# Supplementary material for: Collective chiroptical activity through the interplay of excitonic and charge-transfer effects in localized plasmonic fields
Source: PubMed Central journal article supplement (PMC11156920; doi:10.1038/s41467-024-49086-3), 2024-06-06
Supplement: 41467_2024_49086_MOESM3_ESM.pdf [file 41467_2024_49086_MOESM3_ESM.pdf]

## **Description of Additional Supplementary Files**

**File Name:** Supplementary Data 1

**Description:** LCMS chromatogram and ESI mass spectrum of cBDP-DNA conjugates

**File Name:** Supplementary Data 2

**Description:** DFT data of cBDP Dimer 1-3

**File Name:** Supplementary Data 3

**Description:** Electron tomography tilt images of superstructures

**File Name:** Supplementary Movie 1

**Description:** Tomography analysis of superstructures
