# Supplementary material for: Collective chiroptical activity through the interplay of excitonic and charge-transfer effects in localized plasmonic fields
Source: Nat Commun. 2024 Jun 6;15:4846. doi: 10.1038/s41467-024-49086-3 (PMC11156920; doi:10.1038/s41467-024-49086-3)
Supplement: Supplementary file 5 — Supplementary Data 2 [file 41467_2024_49086_MOESM5_ESM.xlsx]

## Sheet: bodipy
Entering Gaussian System, Link 0=g09
Input=bodipy.gjf
Output=bodipy.log
Initial command:
/public/apps/gs/g09/l1.exe "/tmp/jianghao/scratch/13844.master/Gau-59852.inp" -scrdir="/tmp/jianghao/scratch/13844.master/"
Entering Link 1 = /public/apps/gs/g09/l1.exe PID= 59853.
Copyright (c) 1988,1990,1992,1993,1995,1998,2003,2009,2015,
Gaussian, Inc. All Rights Reserved.
This is part of the Gaussian(R) 09 program. It is based on
the Gaussian(R) 03 system (copyright 2003, Gaussian, Inc.),
the Gaussian(R) 98 system (copyright 1998, Gaussian, Inc.),
the Gaussian(R) 94 system (copyright 1995, Gaussian, Inc.),
the Gaussian 92(TM) system (copyright 1992, Gaussian, Inc.),
the Gaussian 90(TM) system (copyright 1990, Gaussian, Inc.),
the Gaussian 88(TM) system (copyright 1988, Gaussian, Inc.),
the Gaussian 86(TM) system (copyright 1986, Carnegie Mellon
University), and the Gaussian 82(TM) system (copyright 1983,
Carnegie Mellon University). Gaussian is a federally registered
trademark of Gaussian, Inc.
This software contains proprietary and confidential information,
including trade secrets, belonging to Gaussian, Inc.
This software is provided under written license and may be
used, copied, transmitted, or stored only in accord with that
written license.
The following legend is applicable only to US Government
contracts under FAR:
RESTRICTED RIGHTS LEGEND
Use, reproduction and disclosure by the US Government is
subject to restrictions as set forth in subparagraphs (a)
and (c) of the Commercial Computer Software - Restricted
Rights clause in FAR 52.227-19.
Gaussian, Inc.
340 Quinnipiac St., Bldg. 40, Wallingford CT 06492
---------------------------------------------------------------
Warning -- This program may not be used in any manner that
competes with the business of Gaussian, Inc. or will provide
assistance to any competitor of Gaussian, Inc. The licensee
of this program is prohibited from giving any competitor of
Gaussian, Inc. access to this program. By using this program,
the user acknowledges that Gaussian, Inc. is engaged in the
business of creating and licensing software in the field of
computational chemistry and represents and warrants to the
licensee that it is not a competitor of Gaussian, Inc. and that
it will not use this program in any manner prohibited above.
---------------------------------------------------------------
Cite this work as:
Gaussian 09, Revision E.01,
M. J. Frisch, G. W. Trucks, H. B. Schlegel, G. E. Scuseria,
M. A. Robb, J. R. Cheeseman, G. Scalmani, V. Barone, B. Mennucci,
G. A. Petersson, H. Nakatsuji, M. Caricato, X. Li, H. P. Hratchian,
A. F. Izmaylov, J. Bloino, G. Zheng, J. L. Sonnenberg, M. Hada,
M. Ehara, K. Toyota, R. Fukuda, J. Hasegawa, M. Ishida, T. Nakajima,
Y. Honda, O. Kitao, H. Nakai, T. Vreven, J. A. Montgomery, Jr.,
J. E. Peralta, F. Ogliaro, M. Bearpark, J. J. Heyd, E. Brothers,
K. N. Kudin, V. N. Staroverov, T. Keith, R. Kobayashi, J. Normand,
K. Raghavachari, A. Rendell, J. C. Burant, S. S. Iyengar, J. Tomasi,
M. Cossi, N. Rega, J. M. Millam, M. Klene, J. E. Knox, J. B. Cross,
V. Bakken, C. Adamo, J. Jaramillo, R. Gomperts, R. E. Stratmann,
O. Yazyev, A. J. Austin, R. Cammi, C. Pomelli, J. W. Ochterski,
R. L. Martin, K. Morokuma, V. G. Zakrzewski, G. A. Voth,
P. Salvador, J. J. Dannenberg, S. Dapprich, A. D. Daniels,
O. Farkas, J. B. Foresman, J. V. Ortiz, J. Cioslowski,
and D. J. Fox, Gaussian, Inc., Wallingford CT, 2013.
******************************************
Gaussian 09: ES64L-G09RevE.01 30-Nov-2015
17-May-2023
******************************************
%nprocshared=32
Will use up to 32 processors via shared memory.
%chk=bodipy.chk
%mem=32GB
----------------------------------------------------------------------
#p opt freq b3lyp/6-311g(d,p) empiricaldispersion=gd3bj scrf=(solvent=
water,pcm)
----------------------------------------------------------------------
1/14=-1,18=20,19=15,26=3,38=1/1,3;
2/9=110,12=2,17=6,18=5,40=1/2;
3/5=4,6=6,7=101,11=2,16=1,25=1,30=1,70=2201,71=1,72=1,74=-5,124=41/1,2,3;
4//1;
5/5=2,38=5,53=1/2;
6/7=2,8=2,9=2,10=2,28=1/1;
7//1,2,3,16;
1/14=-1,18=20,19=15,26=3/3(2);
2/9=110/2;
99//99;
2/9=110/2;
3/5=4,6=6,7=101,11=2,16=1,25=1,30=1,70=2205,71=1,72=1,74=-5,124=41/1,2,3;
4/5=5,16=3,69=1/1;
5/5=2,38=5,53=1/2;
7//1,2,3,16;
1/14=-1,18=20,19=15,26=3/3(-5);
2/9=110/2;
6/7=2,8=2,9=2,10=2,19=2,28=1/1;
99/9=1/99;
Leave Link 1 at Wed May 17 23:33:57 2023, MaxMem= 4294967296 cpu: 2.4
(Enter /public/apps/gs/g09/l101.exe)
-
T
-
Symbolic Z-matrix:
Charge = 0 Multiplicity = 1
C 4.74122 -8.09279 0.4533
C 4.98946 -8.27711 -0.89485
C 3.89469 -7.98501 -1.86795
C 3.31436 -6.72956 -1.84891
C 5.75597 -8.39657 1.40295
C 6.9827 -8.86642 1.0012
C 7.27503 -9.01386 -0.38628
C 6.28818 -8.69246 -1.33817
C 3.41738 -8.98866 -2.77466
C 2.42699 -8.65251 -3.71662
C 1.87757 -7.33697 -3.71721
C 1.96725 -9.63027 -4.65029
C 8.56069 -9.46349 -0.81325
C 8.85538 -9.55561 -2.15253
B 3.05611 -5.8773 0.76728
O 3.40229 -7.56276 0.9141
O 3.75844 -5.70184 -0.83189
C 2.29801 -6.413 -2.79115
C 3.87898 -10.34144 -2.73317
C 3.42252 -11.27322 -3.63481
C 2.46198 -10.91151 -4.61464
C 7.8851 -9.18037 -3.11909
C 6.64109 -8.7495 -2.72237
H 5.55509 -8.25293 2.47429
H 7.74216 -9.12953 1.75297
H 1.11565 -7.06011 -4.461
H 1.21195 -9.3566 -5.40155
H 9.32076 -9.7377 -0.06622
H 9.84186 -9.91981 -2.47573
H 1.83942 -5.41262 -2.77782
H 4.61014 -10.6416 -1.96746
H 3.80421 -12.30407 -3.59701
H 2.11398 -11.65655 -5.34566
H 8.12982 -9.23446 -4.18981
H 5.90614 -8.44471 -3.48232
C 0.86738 -1.58419 3.18624
C 0.00496 -0.75831 3.90792
C 1.495 -3.755 2.487
N 1.93127 -6.12339 2.33298
C 2.41868 -4.11456 5.37454
N 3.10206 -3.89002 0.54137
C 2.57414 -8.54396 2.84008
C 0.13304 -1.52835 0.71981
C -1.0557 -1.31383 4.62402
C -1.25408 -2.69364 4.61778
C -0.39251 -3.5191 3.8958
C 0.669 -2.964 3.18
C 4.139 -3.4211 -1.61017
C 1.932 -3.374 1.283
C 1.884 -4.927 3.
C 2.30937 -5.14408 4.29235
C 2.62351 -6.51892 4.40805
C 2.38006 -7.09954 3.18274
C 3.09553 -3.20375 -0.55894
C 2.0416 -2.21347 -0.7418
C 1.34886 -2.33588 0.38862
H 1.70321 -1.14582 2.62163
H 0.16228 0.33116 3.91279
H 2.10042 -3.12419 4.97832
H 1.76265 -4.40139 6.22613
H 3.47393 -4.0538 5.72257
H 2.94889 -9.09087 3.7344
H 1.60193 -8.98191 2.51887
H 3.31317 -8.63318 2.01315
H -0.08728 -0.82761 -0.11667
H -0.73461 -2.21013 0.87079
H 0.31523 -0.94814 1.65178
H -1.73506 -0.66231 5.19319
H -2.0899 -3.132 5.18239
H -0.54852 -4.60866 3.89041
H 4.84336 -4.21569 -1.27474
H 3.64908 -3.73705 -2.55809
H 4.69981 -2.47536 -1.77855
H 2.99316 -7.02932 5.30919
H 1.8648 -1.53923 -1.59264
Add virtual bond connecting atoms H64 and O16 Dist= 2.90D+00.
Add virtual bond connecting atoms O16 and B15 Dist= 3.26D+00.
Add virtual bond connecting atoms O17 and B15 Dist= 3.32D+00.
NAtoms= 75 NQM= 75 NQMF= 0 NMMI= 0 NMMIF= 0
NMic= 0 NMicF= 0.
Isotopes and Nuclear Properties:
(Nuclear quadrupole moments (NQMom) in fm**2, nuclear magnetic moments (NMagM)
in nuclear magnetons)
Atom 1 2 3 4 5 6 7 8 9 10
IAtWgt= 12 12 12 12 12 12 12 12 12 12
AtmWgt= 12.0000000 12.0000000 12.0000000 12.0000000 12.0000000 12.0000000 12.0000000 12.0000000 12.0000000 12.0000000
NucSpn= 0 0 0 0 0 0 0 0 0 0
AtZEff= 0.0000000 0.0000000 0.0000000 0.0000000 0.0000000 0.0000000 0.0000000 0.0000000 0.0000000 0.0000000
NQMom= 0.0000000 0.0000000 0.0000000 0.0000000 0.0000000 0.0000000 0.0000000 0.0000000 0.0000000 0.0000000
NMagM= 0.0000000 0.0000000 0.0000000 0.0000000 0.0000000 0.0000000 0.0000000 0.0000000 0.0000000 0.0000000
AtZNuc= 6.0000000 6.0000000 6.0000000 6.0000000 6.0000000 6.0000000 6.0000000 6.0000000 6.0000000 6.0000000
Atom 11 12 13 14 15 16 17 18 19 20
IAtWgt= 12 12 12 12 11 16 16 12 12 12
AtmWgt= 12.0000000 12.0000000 12.0000000 12.0000000 11.0093053 15.9949146 15.9949146 12.0000000 12.0000000 12.0000000
NucSpn= 0 0 0 0 3 0 0 0 0 0
AtZEff= 0.0000000 0.0000000 0.0000000 0.0000000 0.0000000 0.0000000 0.0000000 0.0000000 0.0000000 0.0000000
NQMom= 0.0000000 0.0000000 0.0000000 0.0000000 4.0590000 0.0000000 0.0000000 0.0000000 0.0000000 0.0000000
NMagM= 0.0000000 0.0000000 0.0000000 0.0000000 2.6886370 0.0000000 0.0000000 0.0000000 0.0000000 0.0000000
AtZNuc= 6.0000000 6.0000000 6.0000000 6.0000000 5.0000000 8.0000000 8.0000000 6.0000000 6.0000000 6.0000000
Atom 21 22 23 24 25 26 27 28 29 30
IAtWgt= 12 12 12 1 1 1 1 1 1 1
AtmWgt= 12.0000000 12.0000000 12.0000000 1.0078250 1.0078250 1.0078250 1.0078250 1.0078250 1.0078250 1.0078250
NucSpn= 0 0 0 1 1 1 1 1 1 1
AtZEff= 0.0000000 0.0000000 0.0000000 0.0000000 0.0000000 0.0000000 0.0000000 0.0000000 0.0000000 0.0000000
NQMom= 0.0000000 0.0000000 0.0000000 0.0000000 0.0000000 0.0000000 0.0000000 0.0000000 0.0000000 0.0000000
NMagM= 0.0000000 0.0000000 0.0000000 2.7928460 2.7928460 2.7928460 2.7928460 2.7928460 2.7928460 2.7928460
AtZNuc= 6.0000000 6.0000000 6.0000000 1.0000000 1.0000000 1.0000000 1.0000000 1.0000000 1.0000000 1.0000000
Atom 31 32 33 34 35 36 37 38 39 40
IAtWgt= 1 1 1 1 1 12 12 12 14 12
AtmWgt= 1.0078250 1.0078250 1.0078250 1.0078250 1.0078250 12.0000000 12.0000000 12.0000000 14.0030740 12.0000000
NucSpn= 1 1 1 1 1 0 0 0 2 0
AtZEff= 0.0000000 0.0000000 0.0000000 0.0000000 0.0000000 0.0000000 0.0000000 0.0000000 0.0000000 0.0000000
NQMom= 0.0000000 0.0000000 0.0000000 0.0000000 0.0000000 0.0000000 0.0000000 0.0000000 2.0440000 0.0000000
NMagM= 2.7928460 2.7928460 2.7928460 2.7928460 2.7928460 0.0000000 0.0000000 0.0000000 0.4037610 0.0000000
AtZNuc= 1.0000000 1.0000000 1.0000000 1.0000000 1.0000000 6.0000000 6.0000000 6.0000000 7.0000000 6.0000000
Atom 41 42 43 44 45 46 47 48 49 50
IAtWgt= 14 12 12 12 12 12 12 12 12 12
AtmWgt= 14.0030740 12.0000000 12.0000000 12.0000000 12.0000000 12.0000000 12.0000000 12.0000000 12.0000000 12.0000000
NucSpn= 2 0 0 0 0 0 0 0 0 0
AtZEff= 0.0000000 0.0000000 0.0000000 0.0000000 0.0000000 0.0000000 0.0000000 0.0000000 0.0000000 0.0000000
NQMom= 2.0440000 0.0000000 0.0000000 0.0000000 0.0000000 0.0000000 0.0000000 0.0000000 0.0000000 0.0000000
NMagM= 0.4037610 0.0000000 0.0000000 0.0000000 0.0000000 0.0000000 0.0000000 0.0000000 0.0000000 0.0000000
AtZNuc= 7.0000000 6.0000000 6.0000000 6.0000000 6.0000000 6.0000000 6.0000000 6.0000000 6.0000000 6.0000000
Atom 51 52 53 54 55 56 57 58 59 60
IAtWgt= 12 12 12 12 12 12 1 1 1 1
AtmWgt= 12.0000000 12.0000000 12.0000000 12.0000000 12.0000000 12.0000000 1.0078250 1.0078250 1.0078250 1.0078250
NucSpn= 0 0 0 0 0 0 1 1 1 1
AtZEff= 0.0000000 0.0000000 0.0000000 0.0000000 0.0000000 0.0000000 0.0000000 0.0000000 0.0000000 0.0000000
NQMom= 0.0000000 0.0000000 0.0000000 0.0000000 0.0000000 0.0000000 0.0000000 0.0000000 0.0000000 0.0000000
NMagM= 0.0000000 0.0000000 0.0000000 0.0000000 0.0000000 0.0000000 2.7928460 2.7928460 2.7928460 2.7928460
AtZNuc= 6.0000000 6.0000000 6.0000000 6.0000000 6.0000000 6.0000000 1.0000000 1.0000000 1.0000000 1.0000000
Atom 61 62 63 64 65 66 67 68 69 70
IAtWgt= 1 1 1 1 1 1 1 1 1 1
AtmWgt= 1.0078250 1.0078250 1.0078250 1.0078250 1.0078250 1.0078250 1.0078250 1.0078250 1.0078250 1.0078250
NucSpn= 1 1 1 1 1 1 1 1 1 1
AtZEff= 0.0000000 0.0000000 0.0000000 0.0000000 0.0000000 0.0000000 0.0000000 0.0000000 0.0000000 0.0000000
NQMom= 0.0000000 0.0000000 0.0000000 0.0000000 0.0000000 0.0000000 0.0000000 0.0000000 0.0000000 0.0000000
NMagM= 2.7928460 2.7928460 2.7928460 2.7928460 2.7928460 2.7928460 2.7928460 2.7928460 2.7928460 2.7928460
AtZNuc= 1.0000000 1.0000000 1.0000000 1.0000000 1.0000000 1.0000000 1.0000000 1.0000000 1.0000000 1.0000000
Atom 71 72 73 74 75
IAtWgt= 1 1 1 1 1
AtmWgt= 1.0078250 1.0078250 1.0078250 1.0078250 1.0078250
NucSpn= 1 1 1 1 1
AtZEff= 0.0000000 0.0000000 0.0000000 0.0000000 0.0000000
NQMom= 0.0000000 0.0000000 0.0000000 0.0000000 0.0000000
NMagM= 2.7928460 2.7928460 2.7928460 2.7928460 2.7928460
AtZNuc= 1.0000000 1.0000000 1.0000000 1.0000000 1.0000000
Leave Link 101 at Wed May 17 23:33:57 2023, MaxMem= 4294967296 cpu: 16.4
(Enter /public/apps/gs/g09/l103.exe)
GradGradGradGradGradGradGradGradGradGradGradGradGradGradGradGradGradGrad
Berny optimization.
Initialization pass.
----------------------------
! Initial Parameters !
! (Angstroms and Degrees) !
-------------------------- --------------------------
! Name Definition Value Derivative Info. !
--------------------------------------------------------------------------------
! R1 R(1,2) 1.3831 estimate D2E/DX2 !
! R2 R(1,5) 1.4226 estimate D2E/DX2 !
! R3 R(1,16) 1.512 estimate D2E/DX2 !
! R4 R(2,3) 1.4936 estimate D2E/DX2 !
! R5 R(2,8) 1.4338 estimate D2E/DX2 !
! R6 R(3,4) 1.3832 estimate D2E/DX2 !
! R7 R(3,9) 1.4343 estimate D2E/DX2 !
! R8 R(4,17) 1.5125 estimate D2E/DX2 !
! R9 R(4,18) 1.4216 estimate D2E/DX2 !
! R10 R(5,6) 1.3737 estimate D2E/DX2 !
! R11 R(5,24) 1.0994 estimate D2E/DX2 !
! R12 R(6,7) 1.4256 estimate D2E/DX2 !
! R13 R(6,25) 1.1005 estimate D2E/DX2 !
! R14 R(7,8) 1.4083 estimate D2E/DX2 !
! R15 R(7,13) 1.4274 estimate D2E/DX2 !
! R16 R(8,23) 1.4296 estimate D2E/DX2 !
! R17 R(9,10) 1.4075 estimate D2E/DX2 !
! R18 R(9,19) 1.43 estimate D2E/DX2 !
! R19 R(10,11) 1.4257 estimate D2E/DX2 !
! R20 R(10,12) 1.428 estimate D2E/DX2 !
! R21 R(11,18) 1.3741 estimate D2E/DX2 !
! R22 R(11,26) 1.1002 estimate D2E/DX2 !
! R23 R(12,21) 1.3739 estimate D2E/DX2 !
! R24 R(12,27) 1.0999 estimate D2E/DX2 !
! R25 R(13,14) 1.3744 estimate D2E/DX2 !
! R26 R(13,28) 1.1004 estimate D2E/DX2 !
! R27 R(14,22) 1.42 estimate D2E/DX2 !
! R28 R(14,29) 1.1001 estimate D2E/DX2 !
! R29 R(15,16) 1.7269 estimate D2E/DX2 !
! R30 R(15,17) 1.7554 estimate D2E/DX2 !
! R31 R(16,64) 1.5368 estimate D2E/DX2 !
! R32 R(18,30) 1.1006 estimate D2E/DX2 !
! R33 R(19,20) 1.3746 estimate D2E/DX2 !
! R34 R(19,31) 1.1005 estimate D2E/DX2 !
! R35 R(20,21) 1.419 estimate D2E/DX2 !
! R36 R(20,32) 1.0999 estimate D2E/DX2 !
! R37 R(21,33) 1.1003 estimate D2E/DX2 !
! R38 R(22,23) 1.375 estimate D2E/DX2 !
! R39 R(22,34) 1.0997 estimate D2E/DX2 !
! R40 R(23,35) 1.1003 estimate D2E/DX2 !
! R41 R(36,37) 1.3952 estimate D2E/DX2 !
! R42 R(36,47) 1.394 estimate D2E/DX2 !
! R43 R(36,57) 1.0998 estimate D2E/DX2 !
! R44 R(37,44) 1.3951 estimate D2E/DX2 !
! R45 R(37,58) 1.1008 estimate D2E/DX2 !
! R46 R(38,47) 1.3372 estimate D2E/DX2 !
! R47 R(38,49) 1.3363 estimate D2E/DX2 !
! R48 R(38,50) 1.3372 estimate D2E/DX2 !
! R49 R(39,50) 1.3706 estimate D2E/DX2 !
! R50 R(39,53) 1.3698 estimate D2E/DX2 !
! R51 R(40,51) 1.4977 estimate D2E/DX2 !
! R52 R(40,59) 1.1131 estimate D2E/DX2 !
! R53 R(40,60) 1.1126 estimate D2E/DX2 !
! R54 R(40,61) 1.1128 estimate D2E/DX2 !
! R55 R(41,49) 1.4783 estimate D2E/DX2 !
! R56 R(41,54) 1.2968 estimate D2E/DX2 !
! R57 R(42,53) 1.4971 estimate D2E/DX2 !
! R58 R(42,62) 1.1133 estimate D2E/DX2 !
! R59 R(42,63) 1.1136 estimate D2E/DX2 !
! R60 R(42,64) 1.1126 estimate D2E/DX2 !
! R61 R(43,56) 1.4967 estimate D2E/DX2 !
! R62 R(43,65) 1.1132 estimate D2E/DX2 !
! R63 R(43,66) 1.1137 estimate D2E/DX2 !
! R64 R(43,67) 1.1128 estimate D2E/DX2 !
! R65 R(44,45) 1.394 estimate D2E/DX2 !
! R66 R(44,68) 1.1 estimate D2E/DX2 !
! R67 R(45,46) 1.3946 estimate D2E/DX2 !
! R68 R(45,69) 1.0998 estimate D2E/DX2 !
! R69 R(46,47) 1.3955 estimate D2E/DX2 !
! R70 R(46,70) 1.1007 estimate D2E/DX2 !
! R71 R(48,54) 1.497 estimate D2E/DX2 !
! R72 R(48,71) 1.1136 estimate D2E/DX2 !
! R73 R(48,72) 1.1128 estimate D2E/DX2 !
! R74 R(48,73) 1.1123 estimate D2E/DX2 !
! R75 R(49,56) 1.4892 estimate D2E/DX2 !
! R76 R(50,51) 1.3778 estimate D2E/DX2 !
! R77 R(51,52) 1.415 estimate D2E/DX2 !
! R78 R(52,53) 1.3776 estimate D2E/DX2 !
! R79 R(52,74) 1.0996 estimate D2E/DX2 !
! R80 R(54,55) 1.4577 estimate D2E/DX2 !
! R81 R(55,56) 1.3314 estimate D2E/DX2 !
! R82 R(55,75) 1.0999 estimate D2E/DX2 !
! A1 A(2,1,5) 119.6155 estimate D2E/DX2 !
! A2 A(2,1,16) 120.1796 estimate D2E/DX2 !
! A3 A(5,1,16) 120.2036 estimate D2E/DX2 !
! A4 A(1,2,3) 118.5173 estimate D2E/DX2 !
! A5 A(1,2,8) 120.1686 estimate D2E/DX2 !
! A6 A(3,2,8) 121.275 estimate D2E/DX2 !
! A7 A(2,3,4) 118.4283 estimate D2E/DX2 !
! A8 A(2,3,9) 121.2612 estimate D2E/DX2 !
! A9 A(4,3,9) 120.2776 estimate D2E/DX2 !
! A10 A(3,4,17) 120.1842 estimate D2E/DX2 !
! A11 A(3,4,18) 119.5333 estimate D2E/DX2 !
! A12 A(17,4,18) 120.2824 estimate D2E/DX2 !
! A13 A(1,5,6) 120.9836 estimate D2E/DX2 !
! A14 A(1,5,24) 119.4892 estimate D2E/DX2 !
! A15 A(6,5,24) 119.5272 estimate D2E/DX2 !
! A16 A(5,6,7) 120.2078 estimate D2E/DX2 !
! A17 A(5,6,25) 119.8846 estimate D2E/DX2 !
! A18 A(7,6,25) 119.9076 estimate D2E/DX2 !
! A19 A(6,7,8) 119.3774 estimate D2E/DX2 !
! A20 A(6,7,13) 120.5581 estimate D2E/DX2 !
! A21 A(8,7,13) 120.0579 estimate D2E/DX2 !
! A22 A(2,8,7) 119.4624 estimate D2E/DX2 !
! A23 A(2,8,23) 122.3127 estimate D2E/DX2 !
! A24 A(7,8,23) 118.1875 estimate D2E/DX2 !
! A25 A(3,9,10) 119.3468 estimate D2E/DX2 !
! A26 A(3,9,19) 122.4257 estimate D2E/DX2 !
! A27 A(10,9,19) 118.1957 estimate D2E/DX2 !
! A28 A(9,10,11) 119.4603 estimate D2E/DX2 !
! A29 A(9,10,12) 120.0382 estimate D2E/DX2 !
! A30 A(11,10,12) 120.4963 estimate D2E/DX2 !
! A31 A(10,11,18) 120.1521 estimate D2E/DX2 !
! A32 A(10,11,26) 119.9595 estimate D2E/DX2 !
! A33 A(18,11,26) 119.8884 estimate D2E/DX2 !
! A34 A(10,12,21) 120.3738 estimate D2E/DX2 !
! A35 A(10,12,27) 119.8227 estimate D2E/DX2 !
! A36 A(21,12,27) 119.8034 estimate D2E/DX2 !
! A37 A(7,13,14) 120.3793 estimate D2E/DX2 !
! A38 A(7,13,28) 119.8386 estimate D2E/DX2 !
! A39 A(14,13,28) 119.7822 estimate D2E/DX2 !
! A40 A(13,14,22) 119.9373 estimate D2E/DX2 !
! A41 A(13,14,29) 120.0487 estimate D2E/DX2 !
! A42 A(22,14,29) 120.014 estimate D2E/DX2 !
! A43 A(16,15,17) 95.44 estimate D2E/DX2 !
! A44 A(1,16,15) 119.5882 estimate D2E/DX2 !
! A45 A(1,16,64) 91.441 estimate D2E/DX2 !
! A46 A(15,16,64) 136.8028 estimate D2E/DX2 !
! A47 A(4,17,15) 115.2884 estimate D2E/DX2 !
! A48 A(4,18,11) 121.0448 estimate D2E/DX2 !
! A49 A(4,18,30) 119.49 estimate D2E/DX2 !
! A50 A(11,18,30) 119.4651 estimate D2E/DX2 !
! A51 A(9,19,20) 121.0002 estimate D2E/DX2 !
! A52 A(9,19,31) 119.5186 estimate D2E/DX2 !
! A53 A(20,19,31) 119.4812 estimate D2E/DX2 !
! A54 A(19,20,21) 120.326 estimate D2E/DX2 !
! A55 A(19,20,32) 119.8363 estimate D2E/DX2 !
! A56 A(21,20,32) 119.8377 estimate D2E/DX2 !
! A57 A(12,21,20) 119.9591 estimate D2E/DX2 !
! A58 A(12,21,33) 120.0229 estimate D2E/DX2 !
! A59 A(20,21,33) 120.0179 estimate D2E/DX2 !
! A60 A(14,22,23) 120.305 estimate D2E/DX2 !
! A61 A(14,22,34) 119.8473 estimate D2E/DX2 !
! A62 A(23,22,34) 119.8477 estimate D2E/DX2 !
! A63 A(8,23,22) 121.0115 estimate D2E/DX2 !
! A64 A(8,23,35) 119.5252 estimate D2E/DX2 !
! A65 A(22,23,35) 119.4632 estimate D2E/DX2 !
! A66 A(37,36,47) 120.0168 estimate D2E/DX2 !
! A67 A(37,36,57) 119.9582 estimate D2E/DX2 !
! A68 A(47,36,57) 120.025 estimate D2E/DX2 !
! A69 A(36,37,44) 119.9818 estimate D2E/DX2 !
! A70 A(36,37,58) 119.9863 estimate D2E/DX2 !
! A71 A(44,37,58) 120.0319 estimate D2E/DX2 !
! A72 A(47,38,49) 120.0176 estimate D2E/DX2 !
! A73 A(47,38,50) 119.9551 estimate D2E/DX2 !
! A74 A(49,38,50) 120.0273 estimate D2E/DX2 !
! A75 A(50,39,53) 109.3564 estimate D2E/DX2 !
! A76 A(51,40,59) 109.4827 estimate D2E/DX2 !
! A77 A(51,40,60) 109.4399 estimate D2E/DX2 !
! A78 A(51,40,61) 109.4344 estimate D2E/DX2 !
! A79 A(59,40,60) 109.4647 estimate D2E/DX2 !
! A80 A(59,40,61) 109.5037 estimate D2E/DX2 !
! A81 A(60,40,61) 109.5019 estimate D2E/DX2 !
! A82 A(49,41,54) 103.7069 estimate D2E/DX2 !
! A83 A(53,42,62) 109.4961 estimate D2E/DX2 !
! A84 A(53,42,63) 109.4059 estimate D2E/DX2 !
! A85 A(53,42,64) 109.4864 estimate D2E/DX2 !
! A86 A(62,42,63) 109.4131 estimate D2E/DX2 !
! A87 A(62,42,64) 109.5161 estimate D2E/DX2 !
! A88 A(63,42,64) 109.5097 estimate D2E/DX2 !
! A89 A(56,43,65) 109.5192 estimate D2E/DX2 !
! A90 A(56,43,66) 109.4242 estimate D2E/DX2 !
! A91 A(56,43,67) 109.4901 estimate D2E/DX2 !
! A92 A(65,43,66) 109.4514 estimate D2E/DX2 !
! A93 A(65,43,67) 109.4807 estimate D2E/DX2 !
! A94 A(66,43,67) 109.4617 estimate D2E/DX2 !
! A95 A(37,44,45) 120.0014 estimate D2E/DX2 !
! A96 A(37,44,68) 119.9528 estimate D2E/DX2 !
! A97 A(45,44,68) 120.0458 estimate D2E/DX2 !
! A98 A(44,45,46) 120.0176 estimate D2E/DX2 !
! A99 A(44,45,69) 120.025 estimate D2E/DX2 !
! A100 A(46,45,69) 119.9574 estimate D2E/DX2 !
! A101 A(45,46,47) 120.0026 estimate D2E/DX2 !
! A102 A(45,46,70) 120.0581 estimate D2E/DX2 !
! A103 A(47,46,70) 119.9393 estimate D2E/DX2 !
! A104 A(36,47,38) 119.994 estimate D2E/DX2 !
! A105 A(36,47,46) 119.9799 estimate D2E/DX2 !
! A106 A(38,47,46) 120.0261 estimate D2E/DX2 !
! A107 A(54,48,71) 109.4486 estimate D2E/DX2 !
! A108 A(54,48,72) 109.4212 estimate D2E/DX2 !
! A109 A(54,48,73) 109.5287 estimate D2E/DX2 !
! A110 A(71,48,72) 109.4181 estimate D2E/DX2 !
! A111 A(71,48,73) 109.4741 estimate D2E/DX2 !
! A112 A(72,48,73) 109.5366 estimate D2E/DX2 !
! A113 A(38,49,41) 127.6849 estimate D2E/DX2 !
! A114 A(38,49,56) 127.721 estimate D2E/DX2 !
! A115 A(41,49,56) 104.5941 estimate D2E/DX2 !
! A116 A(38,50,39) 126.0435 estimate D2E/DX2 !
! A117 A(38,50,51) 125.9987 estimate D2E/DX2 !
! A118 A(39,50,51) 107.9578 estimate D2E/DX2 !
! A119 A(40,51,50) 126.3001 estimate D2E/DX2 !
! A120 A(40,51,52) 126.3432 estimate D2E/DX2 !
! A121 A(50,51,52) 107.3568 estimate D2E/DX2 !
! A122 A(51,52,53) 107.3105 estimate D2E/DX2 !
! A123 A(51,52,74) 126.3421 estimate D2E/DX2 !
! A124 A(53,52,74) 126.3474 estimate D2E/DX2 !
! A125 A(39,53,42) 126.0161 estimate D2E/DX2 !
! A126 A(39,53,52) 108.0186 estimate D2E/DX2 !
! A127 A(42,53,52) 125.9653 estimate D2E/DX2 !
! A128 A(41,54,48) 121.0285 estimate D2E/DX2 !
! A129 A(41,54,55) 118.0079 estimate D2E/DX2 !
! A130 A(48,54,55) 120.9635 estimate D2E/DX2 !
! A131 A(54,55,56) 101.9592 estimate D2E/DX2 !
! A132 A(54,55,75) 129.0279 estimate D2E/DX2 !
! A133 A(56,55,75) 129.0129 estimate D2E/DX2 !
! A134 A(43,56,49) 124.1476 estimate D2E/DX2 !
! A135 A(43,56,55) 124.1205 estimate D2E/DX2 !
! A136 A(49,56,55) 111.7318 estimate D2E/DX2 !
! A137 A(16,64,42) 120.9438 estimate D2E/DX2 !
! D1 D(5,1,2,3) 178.3946 estimate D2E/DX2 !
! D2 D(5,1,2,8) -3.8543 estimate D2E/DX2 !
! D3 D(16,1,2,3) -2.0133 estimate D2E/DX2 !
! D4 D(16,1,2,8) 175.7378 estimate D2E/DX2 !
! D5 D(2,1,5,6) 0.2393 estimate D2E/DX2 !
! D6 D(2,1,5,24) -179.7671 estimate D2E/DX2 !
! D7 D(16,1,5,6) -179.3527 estimate D2E/DX2 !
! D8 D(16,1,5,24) 0.6409 estimate D2E/DX2 !
! D9 D(2,1,16,15) -77.3167 estimate D2E/DX2 !
! D10 D(2,1,16,64) 134.158 estimate D2E/DX2 !
! D11 D(5,1,16,15) 102.2729 estimate D2E/DX2 !
! D12 D(5,1,16,64) -46.2523 estimate D2E/DX2 !
! D13 D(1,2,3,4) 55.5659 estimate D2E/DX2 !
! D14 D(1,2,3,9) -122.3519 estimate D2E/DX2 !
! D15 D(8,2,3,4) -122.1592 estimate D2E/DX2 !
! D16 D(8,2,3,9) 59.923 estimate D2E/DX2 !
! D17 D(1,2,8,7) 5.0513 estimate D2E/DX2 !
! D18 D(1,2,8,23) -172.6837 estimate D2E/DX2 !
! D19 D(3,2,8,7) -177.2607 estimate D2E/DX2 !
! D20 D(3,2,8,23) 5.0042 estimate D2E/DX2 !
! D21 D(2,3,4,17) -1.898 estimate D2E/DX2 !
! D22 D(2,3,4,18) 178.1286 estimate D2E/DX2 !
! D23 D(9,3,4,17) 176.0411 estimate D2E/DX2 !
! D24 D(9,3,4,18) -3.9324 estimate D2E/DX2 !
! D25 D(2,3,9,10) -177.0838 estimate D2E/DX2 !
! D26 D(2,3,9,19) 5.0044 estimate D2E/DX2 !
! D27 D(4,3,9,10) 5.0365 estimate D2E/DX2 !
! D28 D(4,3,9,19) -172.8753 estimate D2E/DX2 !
! D29 D(3,4,17,15) -80.7893 estimate D2E/DX2 !
! D30 D(18,4,17,15) 99.184 estimate D2E/DX2 !
! D31 D(3,4,18,11) 0.3268 estimate D2E/DX2 !
! D32 D(3,4,18,30) -179.7711 estimate D2E/DX2 !
! D33 D(17,4,18,11) -179.6466 estimate D2E/DX2 !
! D34 D(17,4,18,30) 0.2555 estimate D2E/DX2 !
! D35 D(1,5,6,7) 2.1858 estimate D2E/DX2 !
! D36 D(1,5,6,25) -177.8311 estimate D2E/DX2 !
! D37 D(24,5,6,7) -177.8078 estimate D2E/DX2 !
! D38 D(24,5,6,25) 2.1753 estimate D2E/DX2 !
! D39 D(5,6,7,8) -0.9426 estimate D2E/DX2 !
! D40 D(5,6,7,13) 178.125 estimate D2E/DX2 !
! D41 D(25,6,7,8) 179.0743 estimate D2E/DX2 !
! D42 D(25,6,7,13) -1.8581 estimate D2E/DX2 !
! D43 D(6,7,8,2) -2.6235 estimate D2E/DX2 !
! D44 D(6,7,8,23) 175.2048 estimate D2E/DX2 !
! D45 D(13,7,8,2) 178.3042 estimate D2E/DX2 !
! D46 D(13,7,8,23) -3.8675 estimate D2E/DX2 !
! D47 D(6,7,13,14) -177.5087 estimate D2E/DX2 !
! D48 D(6,7,13,28) 2.467 estimate D2E/DX2 !
! D49 D(8,7,13,14) 1.5525 estimate D2E/DX2 !
! D50 D(8,7,13,28) -178.4717 estimate D2E/DX2 !
! D51 D(2,8,23,22) -178.5364 estimate D2E/DX2 !
! D52 D(2,8,23,35) 1.4228 estimate D2E/DX2 !
! D53 D(7,8,23,22) 3.701 estimate D2E/DX2 !
! D54 D(7,8,23,35) -176.3398 estimate D2E/DX2 !
! D55 D(3,9,10,11) -2.527 estimate D2E/DX2 !
! D56 D(3,9,10,12) 178.2957 estimate D2E/DX2 !
! D57 D(19,9,10,11) 175.4731 estimate D2E/DX2 !
! D58 D(19,9,10,12) -3.7041 estimate D2E/DX2 !
! D59 D(3,9,19,20) -178.6101 estimate D2E/DX2 !
! D60 D(3,9,19,31) 1.4368 estimate D2E/DX2 !
! D61 D(10,9,19,20) 3.4551 estimate D2E/DX2 !
! D62 D(10,9,19,31) -176.498 estimate D2E/DX2 !
! D63 D(9,10,11,18) -1.0201 estimate D2E/DX2 !
! D64 D(9,10,11,26) 178.9394 estimate D2E/DX2 !
! D65 D(12,10,11,18) 178.1533 estimate D2E/DX2 !
! D66 D(12,10,11,26) -1.8872 estimate D2E/DX2 !
! D67 D(9,10,12,21) 1.6401 estimate D2E/DX2 !
! D68 D(9,10,12,27) -178.4314 estimate D2E/DX2 !
! D69 D(11,10,12,21) -177.5285 estimate D2E/DX2 !
! D70 D(11,10,12,27) 2.4 estimate D2E/DX2 !
! D71 D(10,11,18,4) 2.174 estimate D2E/DX2 !
! D72 D(10,11,18,30) -177.7281 estimate D2E/DX2 !
! D73 D(26,11,18,4) -177.7856 estimate D2E/DX2 !
! D74 D(26,11,18,30) 2.3123 estimate D2E/DX2 !
! D75 D(10,12,21,20) 0.8186 estimate D2E/DX2 !
! D76 D(10,12,21,33) -179.1526 estimate D2E/DX2 !
! D77 D(27,12,21,20) -179.11 estimate D2E/DX2 !
! D78 D(27,12,21,33) 0.9189 estimate D2E/DX2 !
! D79 D(7,13,14,22) 1.0776 estimate D2E/DX2 !
! D80 D(7,13,14,29) -178.9127 estimate D2E/DX2 !
! D81 D(28,13,14,22) -178.8982 estimate D2E/DX2 !
! D82 D(28,13,14,29) 1.1115 estimate D2E/DX2 !
! D83 D(13,14,22,23) -1.2817 estimate D2E/DX2 !
! D84 D(13,14,22,34) 178.7079 estimate D2E/DX2 !
! D85 D(29,14,22,23) 178.7086 estimate D2E/DX2 !
! D86 D(29,14,22,34) -1.3018 estimate D2E/DX2 !
! D87 D(17,15,16,1) 41.9597 estimate D2E/DX2 !
! D88 D(17,15,16,64) 172.2725 estimate D2E/DX2 !
! D89 D(16,15,17,4) 49.2422 estimate D2E/DX2 !
! D90 D(1,16,64,42) 165.4505 estimate D2E/DX2 !
! D91 D(15,16,64,42) 27.0024 estimate D2E/DX2 !
! D92 D(9,19,20,21) -1.0711 estimate D2E/DX2 !
! D93 D(9,19,20,32) 178.8882 estimate D2E/DX2 !
! D94 D(31,19,20,21) 178.882 estimate D2E/DX2 !
! D95 D(31,19,20,32) -1.1586 estimate D2E/DX2 !
! D96 D(19,20,21,12) -1.1044 estimate D2E/DX2 !
! D97 D(19,20,21,33) 178.8668 estimate D2E/DX2 !
! D98 D(32,20,21,12) 178.9363 estimate D2E/DX2 !
! D99 D(32,20,21,33) -1.0925 estimate D2E/DX2 !
! D100 D(14,22,23,8) -1.151 estimate D2E/DX2 !
! D101 D(14,22,23,35) 178.8897 estimate D2E/DX2 !
! D102 D(34,22,23,8) 178.8595 estimate D2E/DX2 !
! D103 D(34,22,23,35) -1.0998 estimate D2E/DX2 !
! D104 D(47,36,37,44) 0.0363 estimate D2E/DX2 !
! D105 D(47,36,37,58) 179.9789 estimate D2E/DX2 !
! D106 D(57,36,37,44) 179.9822 estimate D2E/DX2 !
! D107 D(57,36,37,58) -0.0752 estimate D2E/DX2 !
! D108 D(37,36,47,38) 179.9283 estimate D2E/DX2 !
! D109 D(37,36,47,46) 0.001 estimate D2E/DX2 !
! D110 D(57,36,47,38) -0.0176 estimate D2E/DX2 !
! D111 D(57,36,47,46) -179.9449 estimate D2E/DX2 !
! D112 D(36,37,44,45) -0.0363 estimate D2E/DX2 !
! D113 D(36,37,44,68) 179.972 estimate D2E/DX2 !
! D114 D(58,37,44,45) -179.9788 estimate D2E/DX2 !
! D115 D(58,37,44,68) 0.0295 estimate D2E/DX2 !
! D116 D(49,38,47,36) -39.9606 estimate D2E/DX2 !
! D117 D(49,38,47,46) 139.9667 estimate D2E/DX2 !
! D118 D(50,38,47,36) 139.9972 estimate D2E/DX2 !
! D119 D(50,38,47,46) -40.0755 estimate D2E/DX2 !
! D120 D(47,38,49,41) 161.4258 estimate D2E/DX2 !
! D121 D(47,38,49,56) -18.6195 estimate D2E/DX2 !
! D122 D(50,38,49,41) -18.532 estimate D2E/DX2 !
! D123 D(50,38,49,56) 161.4227 estimate D2E/DX2 !
! D124 D(47,38,50,39) 135.0784 estimate D2E/DX2 !
! D125 D(47,38,50,51) -44.9962 estimate D2E/DX2 !
! D126 D(49,38,50,39) -44.9638 estimate D2E/DX2 !
! D127 D(49,38,50,51) 134.9616 estimate D2E/DX2 !
! D128 D(53,39,50,38) 179.972 estimate D2E/DX2 !
! D129 D(53,39,50,51) 0.0354 estimate D2E/DX2 !
! D130 D(50,39,53,42) -179.9613 estimate D2E/DX2 !
! D131 D(50,39,53,52) -0.0437 estimate D2E/DX2 !
! D132 D(59,40,51,50) -0.0228 estimate D2E/DX2 !
! D133 D(59,40,51,52) 179.987 estimate D2E/DX2 !
! D134 D(60,40,51,50) 119.957 estimate D2E/DX2 !
! D135 D(60,40,51,52) -60.0331 estimate D2E/DX2 !
! D136 D(61,40,51,50) -120.0471 estimate D2E/DX2 !
! D137 D(61,40,51,52) 59.9628 estimate D2E/DX2 !
! D138 D(54,41,49,38) 179.9954 estimate D2E/DX2 !
! D139 D(54,41,49,56) 0.0324 estimate D2E/DX2 !
! D140 D(49,41,54,48) 179.9499 estimate D2E/DX2 !
! D141 D(49,41,54,55) -0.0315 estimate D2E/DX2 !
! D142 D(62,42,53,39) 179.9771 estimate D2E/DX2 !
! D143 D(62,42,53,52) 0.0739 estimate D2E/DX2 !
! D144 D(63,42,53,39) -60.1188 estimate D2E/DX2 !
! D145 D(63,42,53,52) 119.978 estimate D2E/DX2 !
! D146 D(64,42,53,39) 59.8975 estimate D2E/DX2 !
! D147 D(64,42,53,52) -120.0057 estimate D2E/DX2 !
! D148 D(53,42,64,16) -33.7432 estimate D2E/DX2 !
! D149 D(62,42,64,16) -153.8105 estimate D2E/DX2 !
! D150 D(63,42,64,16) 86.2096 estimate D2E/DX2 !
! D151 D(65,43,56,49) 179.983 estimate D2E/DX2 !
! D152 D(65,43,56,55) 0.0059 estimate D2E/DX2 !
! D153 D(66,43,56,49) -60.0407 estimate D2E/DX2 !
! D154 D(66,43,56,55) 119.9822 estimate D2E/DX2 !
! D155 D(67,43,56,49) 59.9303 estimate D2E/DX2 !
! D156 D(67,43,56,55) -120.0467 estimate D2E/DX2 !
! D157 D(37,44,45,46) -0.001 estimate D2E/DX2 !
! D158 D(37,44,45,69) 179.9822 estimate D2E/DX2 !
! D159 D(68,44,45,46) 179.9907 estimate D2E/DX2 !
! D160 D(68,44,45,69) -0.0261 estimate D2E/DX2 !
! D161 D(44,45,46,47) 0.0383 estimate D2E/DX2 !
! D162 D(44,45,46,70) 179.9995 estimate D2E/DX2 !
! D163 D(69,45,46,47) -179.9449 estimate D2E/DX2 !
! D164 D(69,45,46,70) 0.0163 estimate D2E/DX2 !
! D165 D(45,46,47,36) -0.0383 estimate D2E/DX2 !
! D166 D(45,46,47,38) -179.9656 estimate D2E/DX2 !
! D167 D(70,46,47,36) -179.9996 estimate D2E/DX2 !
! D168 D(70,46,47,38) 0.0731 estimate D2E/DX2 !
! D169 D(71,48,54,41) 0.0471 estimate D2E/DX2 !
! D170 D(71,48,54,55) -179.972 estimate D2E/DX2 !
! D171 D(72,48,54,41) 119.9376 estimate D2E/DX2 !
! D172 D(72,48,54,55) -60.0815 estimate D2E/DX2 !
! D173 D(73,48,54,41) -119.9778 estimate D2E/DX2 !
! D174 D(73,48,54,55) 60.0031 estimate D2E/DX2 !
! D175 D(38,49,56,43) 0.0318 estimate D2E/DX2 !
! D176 D(38,49,56,55) -179.9886 estimate D2E/DX2 !
! D177 D(41,49,56,43) 179.9948 estimate D2E/DX2 !
! D178 D(41,49,56,55) -0.0256 estimate D2E/DX2 !
! D179 D(38,50,51,40) 0.0583 estimate D2E/DX2 !
! D180 D(38,50,51,52) -179.95 estimate D2E/DX2 !
! D181 D(39,50,51,40) 179.9949 estimate D2E/DX2 !
! D182 D(39,50,51,52) -0.0135 estimate D2E/DX2 !
! D183 D(40,51,52,53) 179.9787 estimate D2E/DX2 !
! D184 D(40,51,52,74) -0.0033 estimate D2E/DX2 !
! D185 D(50,51,52,53) -0.013 estimate D2E/DX2 !
! D186 D(50,51,52,74) -179.995 estimate D2E/DX2 !
! D187 D(51,52,53,39) 0.0344 estimate D2E/DX2 !
! D188 D(51,52,53,42) 179.9521 estimate D2E/DX2 !
! D189 D(74,52,53,39) -179.9836 estimate D2E/DX2 !
! D190 D(74,52,53,42) -0.0659 estimate D2E/DX2 !
! D191 D(41,54,55,56) 0.016 estimate D2E/DX2 !
! D192 D(41,54,55,75) 179.9708 estimate D2E/DX2 !
! D193 D(48,54,55,56) -179.9655 estimate D2E/DX2 !
! D194 D(48,54,55,75) -0.0107 estimate D2E/DX2 !
! D195 D(54,55,56,43) 179.9877 estimate D2E/DX2 !
! D196 D(54,55,56,49) 0.0081 estimate D2E/DX2 !
! D197 D(75,55,56,43) 0.0329 estimate D2E/DX2 !
! D198 D(75,55,56,49) -179.9467 estimate D2E/DX2 !
--------------------------------------------------------------------------------
Trust Radius=3.00D-01 FncErr=1.00D-07 GrdErr=1.00D-06
Number of steps in this run= 427 maximum allowed number of steps= 450.
GradGradGradGradGradGradGradGradGradGradGradGradGradGradGradGradGradGrad
Leave Link 103 at Wed May 17 23:33:57 2023, MaxMem= 4294967296 cpu: 0.5
(Enter /public/apps/gs/g09/l202.exe)
Stoichiometry C39H31BN2O2
Framework group C1[X(C39H31BN2O2)]
Deg. of freedom 219
Full point group C1 NOp 1
Largest Abelian subgroup C1 NOp 1
Largest concise Abelian subgroup C1 NOp 1
Standard orientation:
---------------------------------------------------------------------
Center Atomic Atomic Coordinates (Angstroms)
Number Number Type X Y Z
---------------------------------------------------------------------
1 6 0 -1.917723 1.558685 -0.189429
2 6 0 -2.935313 0.683270 0.144112
3 6 0 -2.787625 -0.756118 -0.226164
4 6 0 -1.665119 -1.436478 0.210183
5 6 0 -2.049175 2.940694 0.121408
6 6 0 -3.170890 3.419838 0.753234
7 6 0 -4.207230 2.525410 1.151103
8 6 0 -4.078388 1.151011 0.872347
9 6 0 -3.757523 -1.415587 -1.051798
10 6 0 -3.611423 -2.788573 -1.325151
11 6 0 -2.474593 -3.486546 -0.822211
12 6 0 -4.587814 -3.467974 -2.115196
13 6 0 -5.357651 3.009701 1.843488
14 6 0 -6.330310 2.137507 2.270346
15 5 0 0.535252 0.228425 0.055339
16 8 0 -0.669043 1.048022 -0.872084
17 8 0 -0.599891 -0.715014 1.005490
18 6 0 -1.520091 -2.817427 -0.094689
19 6 0 -4.854414 -0.720474 -1.650491
20 6 0 -5.783138 -1.387039 -2.413831
21 6 0 -5.655823 -2.781943 -2.640874
22 6 0 -6.181722 0.743717 2.042806
23 6 0 -5.080851 0.263461 1.373454
24 1 0 -1.240725 3.635319 -0.148113
25 1 0 -3.269501 4.497573 0.953055
26 1 0 -2.361028 -4.563532 -1.016130
27 1 0 -4.483812 -4.546361 -2.305042
28 1 0 -5.466699 4.087443 2.037222
29 1 0 -7.223305 2.518500 2.787685
30 1 0 -0.628498 -3.358967 0.256089
31 1 0 -4.956461 0.364673 -1.498652
32 1 0 -6.629484 -0.836561 -2.850231
33 1 0 -6.412205 -3.313860 -3.237138
34 1 0 -6.950556 0.045232 2.403743
35 1 0 -4.970606 -0.820576 1.220865
36 6 0 5.827797 -0.348691 0.908942
37 6 0 7.201045 -0.491729 0.707922
38 6 0 3.678826 0.102264 0.029263
39 7 0 1.802222 0.942906 -1.233670
40 6 0 4.670988 2.982663 -0.168937
41 7 0 1.711548 -0.538506 1.480328
42 6 0 0.175211 2.431143 -2.525014
43 6 0 4.786738 -2.702502 0.946699
44 6 0 7.740857 -0.318287 -0.566798
45 6 0 6.908173 -0.002906 -1.639387
46 6 0 5.535430 0.139307 -1.438622
47 6 0 4.995113 -0.033310 -0.163647
48 6 0 0.296754 -1.830790 2.981197
49 6 0 3.033626 -0.733544 0.848340
50 6 0 3.008893 1.075224 -0.597326
51 6 0 3.409795 2.388055 -0.715597
52 6 0 2.410192 3.070254 -1.448850
53 6 0 1.429425 2.152992 -1.756240
54 6 0 1.538421 -1.622118 2.171337
55 6 0 2.589533 -2.631481 2.136468
56 6 0 3.485160 -2.069298 1.327446
57 1 0 5.402633 -0.485790 1.913928
58 1 0 7.858151 -0.740432 1.555310
59 1 0 5.253695 2.195460 0.360085
60 1 0 5.278609 3.394978 -1.004786
61 1 0 4.417029 3.798872 0.543575
62 1 0 0.149773 3.504687 -2.818657
63 1 0 0.153568 1.796545 -3.439889
64 1 0 -0.708484 2.198355 -1.890334
65 1 0 4.875864 -3.695855 1.441259
66 1 0 4.825488 -2.833683 -0.158611
67 1 0 5.626740 -2.049170 1.272207
68 1 0 8.823632 -0.430716 -0.724651
69 1 0 7.333337 0.134194 -2.644373
70 1 0 4.877344 0.388323 -2.285039
71 1 0 -0.371435 -0.946971 2.869845
72 1 0 -0.231372 -2.741615 2.620802
73 1 0 0.568420 -1.957673 4.052355
74 1 0 2.415487 4.135204 -1.722802
75 1 0 2.632237 -3.604883 2.646812
---------------------------------------------------------------------
Rotational constants (GHZ): 0.1479645 0.0476139 0.0434127
Leave Link 202 at Wed May 17 23:33:58 2023, MaxMem= 4294967296 cpu: 0.3
(Enter /public/apps/gs/g09/l301.exe)
Standard basis: 6-311G(d,p) (5D, 7F)
Ernie: Thresh= 0.10000D-02 Tol= 0.10000D-05 Strict=F.
There are 1022 symmetry adapted cartesian basis functions of A symmetry.
There are 978 symmetry adapted basis functions of A symmetry.
978 basis functions, 1656 primitive gaussians, 1022 cartesian basis functions
150 alpha electrons 150 beta electrons
nuclear repulsion energy 5042.7051281742 Hartrees.
IExCor= 402 DFT=T Ex+Corr=B3LYP ExCW=0 ScaHFX= 0.200000
ScaDFX= 0.800000 0.720000 1.000000 0.810000 ScalE2= 1.000000 1.000000
IRadAn= 0 IRanWt= -1 IRanGd= 0 ICorTp=0 IEmpDi=141
NAtoms= 75 NActive= 75 NUniq= 75 SFac= 1.00D+00 NAtFMM= 60 NAOKFM=T Big=T
Integral buffers will be 131072 words long.
Raffenetti 2 integral format.
Two-electron integral symmetry is turned on.
R6Disp: Grimme-D3(BJ) Dispersion energy= -0.2061472451 Hartrees.
Nuclear repulsion after empirical dispersion term = 5042.4989809291 Hartrees.
------------------------------------------------------------------------------
Polarizable Continuum Model (PCM)
=================================
Model : PCM (using non-symmetric T matrix).
Atomic radii : UFF (Universal Force Field).
Polarization charges : Total charges.
Charge compensation : None.
Solution method : On-the-fly selection.
Cavity type : Scaled VdW (van der Waals Surface) (Alpha=1.100).
Cavity algorithm : GePol (No added spheres)
Default sphere list used, NSphG= 75.
Lebedev-Laikov grids with approx. 5.0 points / Ang**2.
Smoothing algorithm: York/Karplus (Gamma=1.0000).
Polarization charges: spherical gaussians, with
point-specific exponents (IZeta= 3).
Self-potential: point-specific (ISelfS= 7).
Self-field : sphere-specific E.n sum rule (ISelfD= 2).
1st derivatives : Analytical E(r).r(x)/FMM algorithm (CHGder, D1EAlg=3).
Cavity 1st derivative terms included.
Solvent : Water, Eps= 78.355300 Eps(inf)= 1.777849
------------------------------------------------------------------------------
GePol: Number of generator spheres = 75
GePol: Total number of spheres = 75
GePol: Number of exposed spheres = 75 (100.00%)
GePol: Number of points = 4990
GePol: Average weight of points = 0.13
GePol: Minimum weight of points = 0.17D-11
GePol: Maximum weight of points = 0.20577
GePol: Number of points with low weight = 386
GePol: Fraction of low-weight points (<1% of avg) = 7.74%
GePol: Cavity surface area = 628.198 Ang**2
GePol: Cavity volume = 761.178 Ang**3
Leave Link 301 at Wed May 17 23:33:58 2023, MaxMem= 4294967296 cpu: 2.7
(Enter /public/apps/gs/g09/l302.exe)
NPDir=0 NMtPBC= 1 NCelOv= 1 NCel= 1 NClECP= 1 NCelD= 1
NCelK= 1 NCelE2= 1 NClLst= 1 CellRange= 0.0.
One-electron integrals computed using PRISM.
NBasis= 978 RedAO= T EigKep= 8.26D-05 NBF= 978
NBsUse= 978 1.00D-06 EigRej= -1.00D+00 NBFU= 978
Precomputing XC quadrature grid using
IXCGrd= 4 IRadAn= 0 IRanWt= -1 IRanGd= 0 AccXCQ= 0.00D+00.
Generated NRdTot= 0 NPtTot= 0 NUsed= 0 NTot= 32
NSgBfM= 969 969 969 969 969 MxSgAt= 75 MxSgA2= 75.
Leave Link 302 at Wed May 17 23:34:00 2023, MaxMem= 4294967296 cpu: 65.7
(Enter /public/apps/gs/g09/l303.exe)
DipDrv: MaxL=1.
Leave Link 303 at Wed May 17 23:34:01 2023, MaxMem= 4294967296 cpu: 4.7
(Enter /public/apps/gs/g09/l401.exe)
ExpMin= 9.89D-02 ExpMax= 8.59D+03 ExpMxC= 1.30D+03 IAcc=2 IRadAn= 4 AccDes= 0.00D+00
Harris functional with IExCor= 402 and IRadAn= 4 diagonalized for initial guess.
HarFok: IExCor= 402 AccDes= 0.00D+00 IRadAn= 4 IDoV= 1 UseB2=F ITyADJ=14
ICtDFT= 3500011 ScaDFX= 1.000000 1.000000 1.000000 1.000000
FoFCou: FMM=F IPFlag= 0 FMFlag= 100000 FMFlg1= 2001
NFxFlg= 0 DoJE=T BraDBF=F KetDBF=T FulRan=T
wScrn= 0.000000 ICntrl= 500 IOpCl= 0 I1Cent= 200000004 NGrid= 0
NMat0= 1 NMatS0= 1 NMatT0= 0 NMatD0= 1 NMtDS0= 0 NMtDT0= 0
Petite list used in FoFCou.
Harris En= -1790.15069503934
JPrj=0 DoOrth=F DoCkMO=F.
Leave Link 401 at Wed May 17 23:34:04 2023, MaxMem= 4294967296 cpu: 93.3
(Enter /public/apps/gs/g09/l502.exe)
Closed shell SCF:
Using DIIS extrapolation, IDIIS= 1040.
Integral symmetry usage will be decided dynamically.
IVT= 3192310 IEndB= 3192310 NGot= 4294967296 MDV= 4292837133
LenX= 4292837133 LenY= 4291791627
Requested convergence on RMS density matrix=1.00D-08 within 128 cycles.
Requested convergence on MAX density matrix=1.00D-06.
Requested convergence on energy=1.00D-06.
No special actions if energy rises.
Fock matrices will be formed incrementally for 20 cycles.
Cycle 1 Pass 1 IDiag 1:
FoFJK: IHMeth= 1 ICntrl= 0 DoSepK=F KAlg= 0 I1Cent= 0 FoldK=F
IRaf= 650000000 NMat= 1 IRICut= 1 DoRegI=T DoRafI=F ISym2E= 0.
FoFCou: FMM=T IPFlag= 0 FMFlag= 100000 FMFlg1= 2001
NFxFlg= 0 DoJE=F BraDBF=F KetDBF=F FulRan=T
wScrn= 0.000000 ICntrl= 0 IOpCl= 0 I1Cent= 0 NGrid= 0
NMat0= 1 NMatS0= 1 NMatT0= 0 NMatD0= 1 NMtDS0= 0 NMtDT0= 0
Symmetry not used in FoFCou.
FMM levels: 10 Number of levels for PrismC: 9
Inv3: Mode=1 IEnd= 74700300.
Iteration 1 A*A^-1 deviation from unit magnitude is 7.99D-15 for 4974.
Iteration 1 A*A^-1 deviation from orthogonality is 4.99D-15 for 2681 2310.
Iteration 1 A^-1*A deviation from unit magnitude is 7.33D-15 for 4974.
Iteration 1 A^-1*A deviation from orthogonality is 4.73D-08 for 2710 2695.
Iteration 2 A*A^-1 deviation from unit magnitude is 2.89D-15 for 12.
Iteration 2 A*A^-1 deviation from orthogonality is 3.73D-15 for 3653 208.
Iteration 2 A^-1*A deviation from unit magnitude is 7.77D-16 for 1312.
Iteration 2 A^-1*A deviation from orthogonality is 3.48D-16 for 2562 1639.
E= -1788.92980476845
DIIS: error= 2.75D-02 at cycle 1 NSaved= 1.
NSaved= 1 IEnMin= 1 EnMin= -1788.92980476845 IErMin= 1 ErrMin= 2.75D-02
ErrMax= 2.75D-02 0.00D+00 EMaxC= 1.00D-01 BMatC= 1.16D+00 BMatP= 1.16D+00
IDIUse=3 WtCom= 7.25D-01 WtEn= 2.75D-01
Coeff-Com: 0.100D+01
Coeff-En: 0.100D+01
Coeff: 0.100D+01
Gap= 0.100 Goal= None Shift= 0.000
GapD= 0.100 DampG=0.500 DampE=0.500 DampFc=0.2500 IDamp=-1.
Damping current iteration by 2.50D-01
RMSDP=2.50D-03 MaxDP=3.80D-01 OVMax= 7.02D-01
Cycle 2 Pass 1 IDiag 1:
RMSU= 6.18D-04 CP: 9.86D-01
E= -1789.25773593125 Delta-E= -0.327931162804 Rises=F Damp=T
DIIS: error= 1.56D-02 at cycle 2 NSaved= 2.
NSaved= 2 IEnMin= 2 EnMin= -1789.25773593125 IErMin= 2 ErrMin= 1.56D-02
ErrMax= 1.56D-02 0.00D+00 EMaxC= 1.00D-01 BMatC= 3.06D-01 BMatP= 1.16D+00
IDIUse=3 WtCom= 8.44D-01 WtEn= 1.56D-01
Coeff-Com: -0.675D+00 0.168D+01
Coeff-En: 0.000D+00 0.100D+01
Coeff: -0.570D+00 0.157D+01
Gap= -0.090 Goal= None Shift= 0.000
RMSDP=1.19D-03 MaxDP=1.34D-01 DE=-3.28D-01 OVMax= 5.09D-01
Cycle 3 Pass 1 IDiag 1:
RMSU= 1.18D-03 CP: 9.78D-01 1.08D+00
E= -1789.72145697398 Delta-E= -0.463721042727 Rises=F Damp=F
DIIS: error= 1.31D-02 at cycle 3 NSaved= 3.
NSaved= 3 IEnMin= 3 EnMin= -1789.72145697398 IErMin= 3 ErrMin= 1.31D-02
ErrMax= 1.31D-02 0.00D+00 EMaxC= 1.00D-01 BMatC= 2.43D-01 BMatP= 3.06D-01
IDIUse=3 WtCom= 8.69D-01 WtEn= 1.31D-01
Coeff-Com: -0.503D+00 0.106D+01 0.440D+00
Coeff-En: 0.000D+00 0.000D+00 0.100D+01
Coeff: -0.437D+00 0.923D+00 0.514D+00
Gap= 0.132 Goal= None Shift= 0.000
RMSDP=9.29D-04 MaxDP=1.02D-01 DE=-4.64D-01 OVMax= 2.02D-01
Cycle 4 Pass 1 IDiag 1:
RMSU= 5.05D-04 CP: 9.75D-01 1.28D+00 3.50D-01
E= -1790.00638605391 Delta-E= -0.284929079927 Rises=F Damp=F
DIIS: error= 3.95D-03 at cycle 4 NSaved= 4.
NSaved= 4 IEnMin= 4 EnMin= -1790.00638605391 IErMin= 4 ErrMin= 3.95D-03
ErrMax= 3.95D-03 0.00D+00 EMaxC= 1.00D-01 BMatC= 2.88D-02 BMatP= 2.43D-01
IDIUse=3 WtCom= 9.60D-01 WtEn= 3.95D-02
Coeff-Com: -0.249D+00 0.476D+00 0.271D+00 0.502D+00
Coeff-En: 0.000D+00 0.000D+00 0.000D+00 0.100D+01
Coeff: -0.239D+00 0.457D+00 0.261D+00 0.522D+00
Gap= 0.105 Goal= None Shift= 0.000
RMSDP=2.42D-04 MaxDP=3.18D-02 DE=-2.85D-01 OVMax= 7.47D-02
Cycle 5 Pass 1 IDiag 1:
RMSU= 1.88D-04 CP: 9.76D-01 1.24D+00 4.42D-01 7.94D-01
E= -1790.02519533315 Delta-E= -0.018809279242 Rises=F Damp=F
DIIS: error= 2.99D-03 at cycle 5 NSaved= 5.
NSaved= 5 IEnMin= 5 EnMin= -1790.02519533315 IErMin= 5 ErrMin= 2.99D-03
ErrMax= 2.99D-03 0.00D+00 EMaxC= 1.00D-01 BMatC= 8.82D-03 BMatP= 2.88D-02
IDIUse=3 WtCom= 9.70D-01 WtEn= 2.99D-02
Coeff-Com: -0.930D-01 0.144D+00 0.483D-01 0.332D+00 0.568D+00
Coeff-En: 0.000D+00 0.000D+00 0.000D+00 0.263D+00 0.737D+00
Coeff: -0.902D-01 0.140D+00 0.469D-01 0.330D+00 0.573D+00
Gap= 0.105 Goal= None Shift= 0.000
RMSDP=1.06D-04 MaxDP=1.28D-02 DE=-1.88D-02 OVMax= 3.27D-02
Cycle 6 Pass 1 IDiag 1:
RMSU= 6.08D-05 CP: 9.74D-01 1.28D+00 4.13D-01 8.75D-01 6.62D-01
E= -1790.03351007609 Delta-E= -0.008314742946 Rises=F Damp=F
DIIS: error= 4.58D-04 at cycle 6 NSaved= 6.
NSaved= 6 IEnMin= 6 EnMin= -1790.03351007609 IErMin= 6 ErrMin= 4.58D-04
ErrMax= 4.58D-04 0.00D+00 EMaxC= 1.00D-01 BMatC= 5.59D-04 BMatP= 8.82D-03
IDIUse=3 WtCom= 9.95D-01 WtEn= 4.58D-03
Coeff-Com: -0.334D-01 0.456D-01-0.814D-02 0.113D+00 0.304D+00 0.579D+00
Coeff-En: 0.000D+00 0.000D+00 0.000D+00 0.000D+00 0.000D+00 0.100D+01
Coeff: -0.333D-01 0.454D-01-0.810D-02 0.112D+00 0.303D+00 0.581D+00
Gap= 0.104 Goal= None Shift= 0.000
RMSDP=3.03D-05 MaxDP=1.96D-03 DE=-8.31D-03 OVMax= 7.01D-03
Cycle 7 Pass 1 IDiag 1:
RMSU= 2.64D-05 CP: 9.74D-01 1.28D+00 4.16D-01 8.81D-01 7.14D-01
CP: 8.39D-01
E= -1790.03398588145 Delta-E= -0.000475805351 Rises=F Damp=F
DIIS: error= 2.25D-04 at cycle 7 NSaved= 7.
NSaved= 7 IEnMin= 7 EnMin= -1790.03398588145 IErMin= 7 ErrMin= 2.25D-04
ErrMax= 2.25D-04 0.00D+00 EMaxC= 1.00D-01 BMatC= 9.25D-05 BMatP= 5.59D-04
IDIUse=3 WtCom= 9.98D-01 WtEn= 2.25D-03
Coeff-Com: -0.943D-02 0.108D-01-0.152D-01 0.220D-01 0.116D+00 0.356D+00
Coeff-Com: 0.520D+00
Coeff-En: 0.000D+00 0.000D+00 0.000D+00 0.000D+00 0.000D+00 0.000D+00
Coeff-En: 0.100D+01
Coeff: -0.941D-02 0.107D-01-0.152D-01 0.220D-01 0.116D+00 0.355D+00
Coeff: 0.521D+00
Gap= 0.105 Goal= None Shift= 0.000
RMSDP=1.34D-05 MaxDP=1.57D-03 DE=-4.76D-04 OVMax= 2.84D-03
Cycle 8 Pass 1 IDiag 1:
RMSU= 8.12D-06 CP: 9.74D-01 1.28D+00 4.10D-01 8.88D-01 7.33D-01
CP: 8.82D-01 7.50D-01
E= -1790.03407751564 Delta-E= -0.000091634192 Rises=F Damp=F
DIIS: error= 8.86D-05 at cycle 8 NSaved= 8.
NSaved= 8 IEnMin= 8 EnMin= -1790.03407751564 IErMin= 8 ErrMin= 8.86D-05
ErrMax= 8.86D-05 0.00D+00 EMaxC= 1.00D-01 BMatC= 9.26D-06 BMatP= 9.25D-05
IDIUse=1 WtCom= 1.00D+00 WtEn= 0.00D+00
Coeff-Com: -0.317D-02 0.388D-02-0.717D-02-0.137D-03 0.310D-01 0.123D+00
Coeff-Com: 0.279D+00 0.574D+00
Coeff: -0.317D-02 0.388D-02-0.717D-02-0.137D-03 0.310D-01 0.123D+00
Coeff: 0.279D+00 0.574D+00
Gap= 0.105 Goal= None Shift= 0.000
RMSDP=5.00D-06 MaxDP=3.71D-04 DE=-9.16D-05 OVMax= 1.46D-03
Cycle 9 Pass 1 IDiag 1:
RMSU= 4.35D-06 CP: 9.74D-01 1.28D+00 4.10D-01 8.88D-01 7.37D-01
CP: 8.69D-01 7.76D-01 7.55D-01
E= -1790.03408559197 Delta-E= -0.000008076337 Rises=F Damp=F
DIIS: error= 3.54D-05 at cycle 9 NSaved= 9.
NSaved= 9 IEnMin= 9 EnMin= -1790.03408559197 IErMin= 9 ErrMin= 3.54D-05
ErrMax= 3.54D-05 0.00D+00 EMaxC= 1.00D-01 BMatC= 2.16D-06 BMatP= 9.26D-06
IDIUse=1 WtCom= 1.00D+00 WtEn= 0.00D+00
Coeff-Com: -0.435D-03 0.639D-03-0.174D-02-0.348D-02-0.633D-03 0.559D-02
Coeff-Com: 0.486D-01 0.356D+00 0.596D+00
Coeff: -0.435D-03 0.639D-03-0.174D-02-0.348D-02-0.633D-03 0.559D-02
Coeff: 0.486D-01 0.356D+00 0.596D+00
Gap= 0.105 Goal= None Shift= 0.000
RMSDP=1.99D-06 MaxDP=1.44D-04 DE=-8.08D-06 OVMax= 8.03D-04
Cycle 10 Pass 1 IDiag 1:
RMSU= 1.08D-06 CP: 9.74D-01 1.28D+00 4.10D-01 8.89D-01 7.38D-01
CP: 8.83D-01 8.00D-01 8.81D-01 8.23D-01
E= -1790.03408788137 Delta-E= -0.000002289391 Rises=F Damp=F
DIIS: error= 9.09D-06 at cycle 10 NSaved= 10.
NSaved=10 IEnMin=10 EnMin= -1790.03408788137 IErMin=10 ErrMin= 9.09D-06
ErrMax= 9.09D-06 0.00D+00 EMaxC= 1.00D-01 BMatC= 1.99D-07 BMatP= 2.16D-06
IDIUse=1 WtCom= 1.00D+00 WtEn= 0.00D+00
Coeff-Com: 0.126D-03-0.131D-03-0.409D-03-0.238D-02-0.359D-02-0.940D-02
Coeff-Com: -0.108D-02 0.163D+00 0.337D+00 0.518D+00
Coeff: 0.126D-03-0.131D-03-0.409D-03-0.238D-02-0.359D-02-0.940D-02
Coeff: -0.108D-02 0.163D+00 0.337D+00 0.518D+00
Gap= 0.105 Goal= None Shift= 0.000
RMSDP=6.65D-07 MaxDP=5.33D-05 DE=-2.29D-06 OVMax= 1.72D-04
Cycle 11 Pass 1 IDiag 1:
RMSU= 4.87D-07 CP: 9.74D-01 1.28D+00 4.10D-01 8.89D-01 7.39D-01
CP: 8.83D-01 8.01D-01 9.03D-01 8.81D-01 7.98D-01
E= -1790.03408808363 Delta-E= -0.000000202261 Rises=F Damp=F
DIIS: error= 4.34D-06 at cycle 11 NSaved= 11.
NSaved=11 IEnMin=11 EnMin= -1790.03408808363 IErMin=11 ErrMin= 4.34D-06
ErrMax= 4.34D-06 0.00D+00 EMaxC= 1.00D-01 BMatC= 2.82D-08 BMatP= 1.99D-07
IDIUse=1 WtCom= 1.00D+00 WtEn= 0.00D+00
Coeff-Com: 0.790D-04-0.964D-04 0.103D-03-0.500D-03-0.109D-02-0.457D-02
Coeff-Com: -0.929D-02 0.232D-01 0.609D-01 0.286D+00 0.645D+00
Coeff: 0.790D-04-0.964D-04 0.103D-03-0.500D-03-0.109D-02-0.457D-02
Coeff: -0.929D-02 0.232D-01 0.609D-01 0.286D+00 0.645D+00
Gap= 0.105 Goal= None Shift= 0.000
RMSDP=2.78D-07 MaxDP=2.86D-05 DE=-2.02D-07 OVMax= 1.42D-04
Cycle 12 Pass 1 IDiag 1:
RMSU= 1.82D-07 CP: 9.74D-01 1.28D+00 4.10D-01 8.89D-01 7.39D-01
CP: 8.83D-01 8.01D-01 9.16D-01 8.93D-01 9.30D-01
CP: 8.18D-01
E= -1790.03408811312 Delta-E= -0.000000029496 Rises=F Damp=F
DIIS: error= 1.91D-06 at cycle 12 NSaved= 12.
NSaved=12 IEnMin=12 EnMin= -1790.03408811312 IErMin=12 ErrMin= 1.91D-06
ErrMax= 1.91D-06 0.00D+00 EMaxC= 1.00D-01 BMatC= 5.27D-09 BMatP= 2.82D-08
IDIUse=1 WtCom= 1.00D+00 WtEn= 0.00D+00
Coeff-Com: 0.367D-04-0.442D-04 0.122D-03-0.537D-04-0.242D-03-0.163D-02
Coeff-Com: -0.547D-02-0.393D-02-0.111D-02 0.108D+00 0.387D+00 0.517D+00
Coeff: 0.367D-04-0.442D-04 0.122D-03-0.537D-04-0.242D-03-0.163D-02
Coeff: -0.547D-02-0.393D-02-0.111D-02 0.108D+00 0.387D+00 0.517D+00
Gap= 0.105 Goal= None Shift= 0.000
RMSDP=1.15D-07 MaxDP=1.19D-05 DE=-2.95D-08 OVMax= 3.21D-05
Cycle 13 Pass 1 IDiag 1:
RMSU= 6.42D-08 CP: 9.74D-01 1.28D+00 4.10D-01 8.89D-01 7.39D-01
CP: 8.83D-01 8.02D-01 9.18D-01 9.00D-01 9.44D-01
CP: 8.98D-01 7.54D-01
E= -1790.03408811835 Delta-E= -0.000000005225 Rises=F Damp=F
DIIS: error= 4.99D-07 at cycle 13 NSaved= 13.
NSaved=13 IEnMin=13 EnMin= -1790.03408811835 IErMin=13 ErrMin= 4.99D-07
ErrMax= 4.99D-07 0.00D+00 EMaxC= 1.00D-01 BMatC= 6.61D-10 BMatP= 5.27D-09
IDIUse=1 WtCom= 1.00D+00 WtEn= 0.00D+00
Coeff-Com: 0.223D-04-0.325D-04 0.488D-04 0.368D-04 0.548D-04 0.229D-04
Coeff-Com: -0.121D-02-0.648D-02-0.118D-01 0.233D-02 0.946D-01 0.268D+00
Coeff-Com: 0.654D+00
Coeff: 0.223D-04-0.325D-04 0.488D-04 0.368D-04 0.548D-04 0.229D-04
Coeff: -0.121D-02-0.648D-02-0.118D-01 0.233D-02 0.946D-01 0.268D+00
Coeff: 0.654D+00
Gap= 0.105 Goal= None Shift= 0.000
RMSDP=4.42D-08 MaxDP=3.77D-06 DE=-5.23D-09 OVMax= 1.55D-05
Cycle 14 Pass 1 IDiag 1:
RMSU= 2.47D-08 CP: 9.74D-01 1.28D+00 4.10D-01 8.89D-01 7.39D-01
CP: 8.84D-01 8.02D-01 9.19D-01 9.03D-01 9.58D-01
CP: 9.28D-01 8.38D-01 7.59D-01
E= -1790.03408811896 Delta-E= -0.000000000613 Rises=F Damp=F
DIIS: error= 2.48D-07 at cycle 14 NSaved= 14.
NSaved=14 IEnMin=14 EnMin= -1790.03408811896 IErMin=14 ErrMin= 2.48D-07
ErrMax= 2.48D-07 0.00D+00 EMaxC= 1.00D-01 BMatC= 1.68D-10 BMatP= 6.61D-10
IDIUse=1 WtCom= 1.00D+00 WtEn= 0.00D+00
Coeff-Com: 0.790D-05-0.122D-04 0.155D-04 0.321D-04 0.836D-04 0.286D-03
Coeff-Com: 0.358D-04-0.320D-02-0.643D-02-0.120D-01 0.109D-01 0.933D-01
Coeff-Com: 0.409D+00 0.508D+00
Coeff: 0.790D-05-0.122D-04 0.155D-04 0.321D-04 0.836D-04 0.286D-03
Coeff: 0.358D-04-0.320D-02-0.643D-02-0.120D-01 0.109D-01 0.933D-01
Coeff: 0.409D+00 0.508D+00
Gap= 0.105 Goal= None Shift= 0.000
RMSDP=1.69D-08 MaxDP=1.04D-06 DE=-6.13D-10 OVMax= 5.24D-06
Cycle 15 Pass 1 IDiag 1:
RMSU= 9.27D-09 CP: 9.74D-01 1.28D+00 4.10D-01 8.89D-01 7.39D-01
CP: 8.84D-01 8.02D-01 9.19D-01 9.04D-01 9.60D-01
CP: 9.32D-01 8.42D-01 8.76D-01 6.95D-01
E= -1790.03408811907 Delta-E= -0.000000000110 Rises=F Damp=F
DIIS: error= 8.77D-08 at cycle 15 NSaved= 15.
NSaved=15 IEnMin=15 EnMin= -1790.03408811907 IErMin=15 ErrMin= 8.77D-08
ErrMax= 8.77D-08 0.00D+00 EMaxC= 1.00D-01 BMatC= 1.70D-11 BMatP= 1.68D-10
IDIUse=1 WtCom= 1.00D+00 WtEn= 0.00D+00
Coeff-Com: 0.154D-05-0.238D-05 0.248D-05 0.139D-04 0.385D-04 0.159D-03
Coeff-Com: 0.202D-03-0.832D-03-0.169D-02-0.741D-02-0.937D-02 0.490D-02
Coeff-Com: 0.117D+00 0.278D+00 0.618D+00
Coeff: 0.154D-05-0.238D-05 0.248D-05 0.139D-04 0.385D-04 0.159D-03
Coeff: 0.202D-03-0.832D-03-0.169D-02-0.741D-02-0.937D-02 0.490D-02
Coeff: 0.117D+00 0.278D+00 0.618D+00
Gap= 0.105 Goal= None Shift= 0.000
RMSDP=6.28D-09 MaxDP=4.11D-07 DE=-1.10D-10 OVMax= 1.17D-06
Error on total polarization charges = 0.02049
SCF Done: E(RB3LYP) = -1790.03408812 A.U. after 15 cycles
NFock= 15 Conv=0.63D-08 -V/T= 2.0045
KE= 1.781960352780D+03 PE=-1.424956141845D+04 EE= 5.635067996625D+03
Leave Link 502 at Wed May 17 23:37:36 2023, MaxMem= 4294967296 cpu: 6598.0
(Enter /public/apps/gs/g09/l601.exe)
Copying SCF densities to generalized density rwf, IOpCl= 0 IROHF=0.
**********************************************************************
Population analysis using the SCF density.
**********************************************************************
Orbital symmetries:
Occupied (A) (A) (A) (A) (A) (A) (A) (A) (A) (A) (A) (A)
(A) (A) (A) (A) (A) (A) (A) (A) (A) (A) (A) (A)
(A) (A) (A) (A) (A) (A) (A) (A) (A) (A) (A) (A)
(A) (A) (A) (A) (A) (A) (A) (A) (A) (A) (A) (A)
(A) (A) (A) (A) (A) (A) (A) (A) (A) (A) (A) (A)
(A) (A) (A) (A) (A) (A) (A) (A) (A) (A) (A) (A)
(A) (A) (A) (A) (A) (A) (A) (A) (A) (A) (A) (A)
(A) (A) (A) (A) (A) (A) (A) (A) (A) (A) (A) (A)
(A) (A) (A) (A) (A) (A) (A) (A) (A) (A) (A) (A)
(A) (A) (A) (A) (A) (A) (A) (A) (A) (A) (A) (A)
(A) (A) (A) (A) (A) (A) (A) (A) (A) (A) (A) (A)
(A) (A) (A) (A) (A) (A) (A) (A) (A) (A) (A) (A)
(A) (A) (A) (A) (A) (A)
Virtual (A) (A) (A) (A) (A) (A) (A) (A) (A) (A) (A) (A)
(A) (A) (A) (A) (A) (A) (A) (A) (A) (A) (A) (A)
(A) (A) (A) (A) (A) (A) (A) (A) (A) (A) (A) (A)
(A) (A) (A) (A) (A) (A) (A) (A) (A) (A) (A) (A)
(A) (A) (A) (A) (A) (A) (A) (A) (A) (A) (A) (A)
(A) (A) (A) (A) (A) (A) (A) (A) (A) (A) (A) (A)
(A) (A) (A) (A) (A) (A) (A) (A) (A) (A) (A) (A)
(A) (A) (A) (A) (A) (A) (A) (A) (A) (A) (A) (A)
(A) (A) (A) (A) (A) (A) (A) (A) (A) (A) (A) (A)
(A) (A) (A) (A) (A) (A) (A) (A) (A) (A) (A) (A)
(A) (A) (A) (A) (A) (A) (A) (A) (A) (A) (A) (A)
(A) (A) (A) (A) (A) (A) (A) (A) (A) (A) (A) (A)
(A) (A) (A) (A) (A) (A) (A) (A) (A) (A) (A) (A)
(A) (A) (A) (A) (A) (A) (A) (A) (A) (A) (A) (A)
(A) (A) (A) (A) (A) (A) (A) (A) (A) (A) (A) (A)
(A) (A) (A) (A) (A) (A) (A) (A) (A) (A) (A) (A)
(A) (A) (A) (A) (A) (A) (A) (A) (A) (A) (A) (A)
(A) (A) (A) (A) (A) (A) (A) (A) (A) (A) (A) (A)
(A) (A) (A) (A) (A) (A) (A) (A) (A) (A) (A) (A)
(A) (A) (A) (A) (A) (A) (A) (A) (A) (A) (A) (A)
(A) (A) (A) (A) (A) (A) (A) (A) (A) (A) (A) (A)
(A) (A) (A) (A) (A) (A) (A) (A) (A) (A) (A) (A)
(A) (A) (A) (A) (A) (A) (A) (A) (A) (A) (A) (A)
(A) (A) (A) (A) (A) (A) (A) (A) (A) (A) (A) (A)
(A) (A) (A) (A) (A) (A) (A) (A) (A) (A) (A) (A)
(A) (A) (A) (A) (A) (A) (A) (A) (A) (A) (A) (A)
(A) (A) (A) (A) (A) (A) (A) (A) (A) (A) (A) (A)
(A) (A) (A) (A) (A) (A) (A) (A) (A) (A) (A) (A)
(A) (A) (A) (A) (A) (A) (A) (A) (A) (A) (A) (A)
(A) (A) (A) (A) (A) (A) (A) (A) (A) (A) (A) (A)
(A) (A) (A) (A) (A) (A) (A) (A) (A) (A) (A) (A)
(A) (A) (A) (A) (A) (A) (A) (A) (A) (A) (A) (A)
(A) (A) (A) (A) (A) (A) (A) (A) (A) (A) (A) (A)
(A) (A) (A) (A) (A) (A) (A) (A) (A) (A) (A) (A)
(A) (A) (A) (A) (A) (A) (A) (A) (A) (A) (A) (A)
(A) (A) (A) (A) (A) (A) (A) (A) (A) (A) (A) (A)
(A) (A) (A) (A) (A) (A) (A) (A) (A) (A) (A) (A)
(A) (A) (A) (A) (A) (A) (A) (A) (A) (A) (A) (A)
(A) (A) (A) (A) (A) (A) (A) (A) (A) (A) (A) (A)
(A) (A) (A) (A) (A) (A) (A) (A) (A) (A) (A) (A)
(A) (A) (A) (A) (A) (A) (A) (A) (A) (A) (A) (A)
(A) (A) (A) (A) (A) (A) (A) (A) (A) (A) (A) (A)
(A) (A) (A) (A) (A) (A) (A) (A) (A) (A) (A) (A)
(A) (A) (A) (A) (A) (A) (A) (A) (A) (A) (A) (A)
(A) (A) (A) (A) (A) (A) (A) (A) (A) (A) (A) (A)
(A) (A) (A) (A) (A) (A) (A) (A) (A) (A) (A) (A)
(A) (A) (A) (A) (A) (A) (A) (A) (A) (A) (A) (A)
(A) (A) (A) (A) (A) (A) (A) (A) (A) (A) (A) (A)
(A) (A) (A) (A) (A) (A) (A) (A) (A) (A) (A) (A)
(A) (A) (A) (A) (A) (A) (A) (A) (A) (A) (A) (A)
(A) (A) (A) (A) (A) (A) (A) (A) (A) (A) (A) (A)
(A) (A) (A) (A) (A) (A) (A) (A) (A) (A) (A) (A)
(A) (A) (A) (A) (A) (A) (A) (A) (A) (A) (A) (A)
(A) (A) (A) (A) (A) (A) (A) (A) (A) (A) (A) (A)
(A) (A) (A) (A) (A) (A) (A) (A) (A) (A) (A) (A)
(A) (A) (A) (A) (A) (A) (A) (A) (A) (A) (A) (A)
(A) (A) (A) (A) (A) (A) (A) (A) (A) (A) (A) (A)
(A) (A) (A) (A) (A) (A) (A) (A) (A) (A) (A) (A)
(A) (A) (A) (A) (A) (A) (A) (A) (A) (A) (A) (A)
(A) (A) (A) (A) (A) (A) (A) (A) (A) (A) (A) (A)
(A) (A) (A) (A) (A) (A) (A) (A) (A) (A) (A) (A)
(A) (A) (A) (A) (A) (A) (A) (A) (A) (A) (A) (A)
(A) (A) (A) (A) (A) (A) (A) (A) (A) (A) (A) (A)
(A) (A) (A) (A) (A) (A) (A) (A) (A) (A) (A) (A)
(A) (A) (A) (A) (A) (A) (A) (A) (A) (A) (A) (A)
(A) (A) (A) (A) (A) (A) (A) (A) (A) (A) (A) (A)
(A) (A) (A) (A) (A) (A) (A) (A) (A) (A) (A) (A)
(A) (A) (A) (A) (A) (A) (A) (A) (A) (A) (A) (A)
(A) (A) (A) (A) (A) (A) (A) (A) (A) (A) (A) (A)
The electronic state is 1-A.
Alpha occ. eigenvalues -- -19.12573 -19.12306 -14.34944 -14.34146 -10.24058
Alpha occ. eigenvalues -- -10.23708 -10.23140 -10.20842 -10.20057 -10.19550
Alpha occ. eigenvalues -- -10.19531 -10.19491 -10.19431 -10.19291 -10.19257
Alpha occ. eigenvalues -- -10.19137 -10.19129 -10.19100 -10.19027 -10.19015
Alpha occ. eigenvalues -- -10.18703 -10.18658 -10.18640 -10.18583 -10.18578
Alpha occ. eigenvalues -- -10.18494 -10.18485 -10.18393 -10.18280 -10.18220
Alpha occ. eigenvalues -- -10.18213 -10.18154 -10.18146 -10.18107 -10.18080
Alpha occ. eigenvalues -- -10.18018 -10.17657 -10.17261 -10.16818 -10.16637
Alpha occ. eigenvalues -- -10.16212 -10.15790 -10.14544 -6.93744 -0.99275
Alpha occ. eigenvalues -- -0.97753 -0.97298 -0.95223 -0.90031 -0.89104
Alpha occ. eigenvalues -- -0.87946 -0.84365 -0.83183 -0.82388 -0.81191
Alpha occ. eigenvalues -- -0.80169 -0.78760 -0.76888 -0.76618 -0.76455
Alpha occ. eigenvalues -- -0.75506 -0.74680 -0.74443 -0.73864 -0.72591
Alpha occ. eigenvalues -- -0.71151 -0.70360 -0.69160 -0.67384 -0.64282
Alpha occ. eigenvalues -- -0.63934 -0.62586 -0.62268 -0.62196 -0.61568
Alpha occ. eigenvalues -- -0.61021 -0.59680 -0.58005 -0.57439 -0.55626
Alpha occ. eigenvalues -- -0.54747 -0.54155 -0.53087 -0.52632 -0.52443
Alpha occ. eigenvalues -- -0.52028 -0.51242 -0.50556 -0.49909 -0.49156
Alpha occ. eigenvalues -- -0.48377 -0.47965 -0.47489 -0.46356 -0.45848
Alpha occ. eigenvalues -- -0.45507 -0.45219 -0.45039 -0.44743 -0.44433
Alpha occ. eigenvalues -- -0.43921 -0.43726 -0.43349 -0.43202 -0.42937
Alpha occ. eigenvalues -- -0.42661 -0.42457 -0.41998 -0.41814 -0.41401
Alpha occ. eigenvalues -- -0.41224 -0.41002 -0.40181 -0.39983 -0.39835
Alpha occ. eigenvalues -- -0.39585 -0.39329 -0.38742 -0.38469 -0.37778
Alpha occ. eigenvalues -- -0.37614 -0.36720 -0.36572 -0.36285 -0.35929
Alpha occ. eigenvalues -- -0.35717 -0.35625 -0.35279 -0.35198 -0.34767
Alpha occ. eigenvalues -- -0.34359 -0.33685 -0.33116 -0.32174 -0.31720
Alpha occ. eigenvalues -- -0.31297 -0.30184 -0.29605 -0.29108 -0.28829
Alpha occ. eigenvalues -- -0.27033 -0.26180 -0.25893 -0.25386 -0.24689
Alpha occ. eigenvalues -- -0.24489 -0.24239 -0.22745 -0.21952 -0.20327
Alpha virt. eigenvalues -- -0.09829 -0.06897 -0.05965 -0.05025 -0.04902
Alpha virt. eigenvalues -- -0.02718 -0.02319 -0.01856 -0.01367 0.00724
Alpha virt. eigenvalues -- 0.02072 0.02997 0.03911 0.04159 0.04750
Alpha virt. eigenvalues -- 0.04936 0.05331 0.05729 0.06015 0.06524
Alpha virt. eigenvalues -- 0.06845 0.07180 0.07427 0.07507 0.07870
Alpha virt. eigenvalues -- 0.08491 0.08578 0.08636 0.09007 0.09195
Alpha virt. eigenvalues -- 0.09660 0.10325 0.10535 0.10709 0.11210
Alpha virt. eigenvalues -- 0.11637 0.11979 0.12361 0.12397 0.12777
Alpha virt. eigenvalues -- 0.13157 0.13204 0.13586 0.13665 0.13989
Alpha virt. eigenvalues -- 0.14059 0.14774 0.15253 0.16039 0.17239
Alpha virt. eigenvalues -- 0.17589 0.17800 0.18328 0.18510 0.18627
Alpha virt. eigenvalues -- 0.20059 0.20736 0.21531 0.21783 0.22102
Alpha virt. eigenvalues -- 0.22204 0.23191 0.23495 0.24448 0.24649
Alpha virt. eigenvalues -- 0.25067 0.25433 0.25724 0.26032 0.26629
Alpha virt. eigenvalues -- 0.26845 0.27023 0.27090 0.27382 0.27588
Alpha virt. eigenvalues -- 0.27777 0.27817 0.27949 0.28256 0.28944
Alpha virt. eigenvalues -- 0.29117 0.29788 0.29936 0.30348 0.30488
Alpha virt. eigenvalues -- 0.31037 0.31514 0.31900 0.32399 0.32561
Alpha virt. eigenvalues -- 0.33591 0.33889 0.34448 0.34747 0.35251
Alpha virt. eigenvalues -- 0.35373 0.35437 0.36143 0.36325 0.36596
Alpha virt. eigenvalues -- 0.36752 0.36946 0.37239 0.37691 0.37953
Alpha virt. eigenvalues -- 0.38161 0.38464 0.38710 0.38918 0.39580
Alpha virt. eigenvalues -- 0.39736 0.39889 0.40054 0.40275 0.40539
Alpha virt. eigenvalues -- 0.40911 0.41038 0.41451 0.41969 0.42081
Alpha virt. eigenvalues -- 0.42341 0.42636 0.42800 0.42906 0.43331
Alpha virt. eigenvalues -- 0.43478 0.43755 0.44093 0.44333 0.44605
Alpha virt. eigenvalues -- 0.44971 0.45213 0.45377 0.45467 0.45931
Alpha virt. eigenvalues -- 0.46307 0.46758 0.47048 0.47490 0.47839
Alpha virt. eigenvalues -- 0.48103 0.48374 0.48536 0.48870 0.49608
Alpha virt. eigenvalues -- 0.50131 0.50420 0.50753 0.50935 0.51112
Alpha virt. eigenvalues -- 0.51346 0.51520 0.51817 0.52259 0.52778
Alpha virt. eigenvalues -- 0.53071 0.53158 0.53409 0.53660 0.54150
Alpha virt. eigenvalues -- 0.54311 0.54572 0.54912 0.55380 0.55967
Alpha virt. eigenvalues -- 0.56217 0.56624 0.56922 0.57204 0.57272
Alpha virt. eigenvalues -- 0.57705 0.58248 0.58637 0.58893 0.59531
Alpha virt. eigenvalues -- 0.59669 0.59799 0.59857 0.60021 0.60395
Alpha virt. eigenvalues -- 0.60499 0.60657 0.61020 0.61160 0.61505
Alpha virt. eigenvalues -- 0.61798 0.61980 0.62155 0.62908 0.63163
Alpha virt. eigenvalues -- 0.63325 0.63615 0.63692 0.63766 0.64029
Alpha virt. eigenvalues -- 0.64698 0.64893 0.65470 0.65727 0.65807
Alpha virt. eigenvalues -- 0.66235 0.66751 0.67036 0.67452 0.67717
Alpha virt. eigenvalues -- 0.67884 0.68555 0.68749 0.69307 0.69526
Alpha virt. eigenvalues -- 0.69737 0.70288 0.70654 0.70964 0.71266
Alpha virt. eigenvalues -- 0.72109 0.72668 0.72751 0.73147 0.73357
Alpha virt. eigenvalues -- 0.73483 0.73941 0.74683 0.75028 0.75766
Alpha virt. eigenvalues -- 0.75906 0.76312 0.76578 0.77138 0.77351
Alpha virt. eigenvalues -- 0.77980 0.78512 0.78577 0.78887 0.79417
Alpha virt. eigenvalues -- 0.79534 0.79840 0.80843 0.81347 0.81672
Alpha virt. eigenvalues -- 0.81801 0.81901 0.82443 0.83447 0.84093
Alpha virt. eigenvalues -- 0.84547 0.85001 0.85313 0.86146 0.86822
Alpha virt. eigenvalues -- 0.86968 0.87712 0.88127 0.88148 0.88418
Alpha virt. eigenvalues -- 0.88865 0.89073 0.89689 0.89831 0.90392
Alpha virt. eigenvalues -- 0.90911 0.91421 0.91684 0.92630 0.92958
Alpha virt. eigenvalues -- 0.93920 0.94262 0.94835 0.95422 0.96077
Alpha virt. eigenvalues -- 0.96939 0.97025 0.97654 0.98190 0.98937
Alpha virt. eigenvalues -- 0.99677 1.00111 1.00813 1.01059 1.01281
Alpha virt. eigenvalues -- 1.01626 1.02235 1.02647 1.02988 1.03604
Alpha virt. eigenvalues -- 1.03641 1.04385 1.04585 1.05041 1.05501
Alpha virt. eigenvalues -- 1.05674 1.06023 1.06918 1.07369 1.07514
Alpha virt. eigenvalues -- 1.07718 1.08108 1.08403 1.08757 1.09209
Alpha virt. eigenvalues -- 1.09397 1.10075 1.10564 1.10704 1.11500
Alpha virt. eigenvalues -- 1.11551 1.11820 1.13127 1.13495 1.13731
Alpha virt. eigenvalues -- 1.14505 1.15370 1.15622 1.16178 1.16511
Alpha virt. eigenvalues -- 1.17517 1.18117 1.19423 1.20724 1.20808
Alpha virt. eigenvalues -- 1.21254 1.22953 1.23278 1.23792 1.24997
Alpha virt. eigenvalues -- 1.26060 1.26971 1.27523 1.28398 1.28513
Alpha virt. eigenvalues -- 1.28907 1.30161 1.30338 1.30789 1.32334
Alpha virt. eigenvalues -- 1.33621 1.33946 1.34328 1.34885 1.36253
Alpha virt. eigenvalues -- 1.37144 1.37465 1.37705 1.38227 1.39103
Alpha virt. eigenvalues -- 1.39357 1.39893 1.40595 1.40911 1.41436
Alpha virt. eigenvalues -- 1.41885 1.42270 1.42898 1.43440 1.43655
Alpha virt. eigenvalues -- 1.44154 1.45396 1.45608 1.45764 1.46409
Alpha virt. eigenvalues -- 1.46635 1.47096 1.48053 1.48143 1.48367
Alpha virt. eigenvalues -- 1.48483 1.48980 1.49450 1.49687 1.49764
Alpha virt. eigenvalues -- 1.49981 1.50925 1.51396 1.51928 1.52169
Alpha virt. eigenvalues -- 1.52584 1.52780 1.52992 1.53412 1.53816
Alpha virt. eigenvalues -- 1.54177 1.54359 1.54438 1.54925 1.54955
Alpha virt. eigenvalues -- 1.55189 1.55620 1.55981 1.57213 1.57801
Alpha virt. eigenvalues -- 1.58230 1.58716 1.58742 1.58986 1.59227
Alpha virt. eigenvalues -- 1.59697 1.59825 1.60043 1.60401 1.60625
Alpha virt. eigenvalues -- 1.61396 1.61927 1.62420 1.62489 1.62949
Alpha virt. eigenvalues -- 1.63008 1.64327 1.64421 1.65058 1.65418
Alpha virt. eigenvalues -- 1.65686 1.65985 1.66289 1.66844 1.67374
Alpha virt. eigenvalues -- 1.68352 1.68835 1.69394 1.69570 1.69774
Alpha virt. eigenvalues -- 1.70139 1.70521 1.71542 1.71773 1.71944
Alpha virt. eigenvalues -- 1.72704 1.72951 1.73116 1.73595 1.74169
Alpha virt. eigenvalues -- 1.74611 1.74792 1.75269 1.75364 1.76157
Alpha virt. eigenvalues -- 1.76373 1.76760 1.77353 1.77730 1.77916
Alpha virt. eigenvalues -- 1.78412 1.78570 1.79220 1.79697 1.80577
Alpha virt. eigenvalues -- 1.81561 1.81724 1.82385 1.83330 1.83578
Alpha virt. eigenvalues -- 1.84434 1.84684 1.85024 1.85406 1.85789
Alpha virt. eigenvalues -- 1.86385 1.87115 1.87758 1.88125 1.88561
Alpha virt. eigenvalues -- 1.88882 1.89163 1.89837 1.89935 1.89975
Alpha virt. eigenvalues -- 1.90812 1.91289 1.91531 1.91712 1.91993
Alpha virt. eigenvalues -- 1.92252 1.92530 1.92731 1.93050 1.93680
Alpha virt. eigenvalues -- 1.94079 1.94208 1.94860 1.94942 1.95406
Alpha virt. eigenvalues -- 1.95811 1.96408 1.96751 1.97152 1.97899
Alpha virt. eigenvalues -- 1.98297 1.98574 1.99405 1.99585 2.00132
Alpha virt. eigenvalues -- 2.00552 2.01386 2.01907 2.02784 2.02914
Alpha virt. eigenvalues -- 2.03464 2.04478 2.05264 2.05580 2.05828
Alpha virt. eigenvalues -- 2.06713 2.07290 2.07886 2.08576 2.09062
Alpha virt. eigenvalues -- 2.09214 2.09859 2.10408 2.10472 2.11353
Alpha virt. eigenvalues -- 2.12368 2.12677 2.13224 2.13573 2.14217
Alpha virt. eigenvalues -- 2.15411 2.16511 2.16965 2.17822 2.18567
Alpha virt. eigenvalues -- 2.19049 2.19988 2.20882 2.21149 2.21812
Alpha virt. eigenvalues -- 2.23245 2.23717 2.24336 2.25431 2.25814
Alpha virt. eigenvalues -- 2.27051 2.28305 2.28770 2.29171 2.30166
Alpha virt. eigenvalues -- 2.30881 2.31246 2.32205 2.32985 2.33380
Alpha virt. eigenvalues -- 2.34234 2.34498 2.34825 2.35814 2.36379
Alpha virt. eigenvalues -- 2.36859 2.36888 2.37642 2.37859 2.38362
Alpha virt. eigenvalues -- 2.38654 2.39107 2.39391 2.39843 2.40534
Alpha virt. eigenvalues -- 2.40581 2.41312 2.41783 2.43203 2.43947
Alpha virt. eigenvalues -- 2.44512 2.45120 2.46121 2.46858 2.47787
Alpha virt. eigenvalues -- 2.48366 2.49622 2.50331 2.50566 2.50766
Alpha virt. eigenvalues -- 2.51590 2.52031 2.53080 2.53768 2.54228
Alpha virt. eigenvalues -- 2.54810 2.55358 2.55644 2.56390 2.57138
Alpha virt. eigenvalues -- 2.57830 2.58369 2.58763 2.59169 2.59404
Alpha virt. eigenvalues -- 2.59769 2.59835 2.60597 2.60913 2.60995
Alpha virt. eigenvalues -- 2.61507 2.61907 2.62102 2.62147 2.62616
Alpha virt. eigenvalues -- 2.62709 2.62900 2.63353 2.63926 2.64325
Alpha virt. eigenvalues -- 2.64365 2.64907 2.65296 2.65855 2.66515
Alpha virt. eigenvalues -- 2.66919 2.67055 2.67282 2.67571 2.67653
Alpha virt. eigenvalues -- 2.68692 2.68959 2.69398 2.69620 2.70452
Alpha virt. eigenvalues -- 2.71502 2.72320 2.72364 2.73231 2.73388
Alpha virt. eigenvalues -- 2.73537 2.73749 2.74477 2.75397 2.75672
Alpha virt. eigenvalues -- 2.76477 2.76628 2.77030 2.77576 2.78352
Alpha virt. eigenvalues -- 2.78576 2.79037 2.79550 2.80112 2.80979
Alpha virt. eigenvalues -- 2.81262 2.82924 2.83968 2.84629 2.85311
Alpha virt. eigenvalues -- 2.85534 2.86160 2.86493 2.86873 2.87625
Alpha virt. eigenvalues -- 2.88014 2.88164 2.88485 2.90033 2.90580
Alpha virt. eigenvalues -- 2.91282 2.92531 2.92900 2.93164 2.93275
Alpha virt. eigenvalues -- 2.94394 2.95275 2.96502 2.97028 2.98408
Alpha virt. eigenvalues -- 2.99279 3.00660 3.00894 3.01548 3.03142
Alpha virt. eigenvalues -- 3.04066 3.04449 3.04791 3.05576 3.06054
Alpha virt. eigenvalues -- 3.07283 3.09537 3.09650 3.10070 3.12575
Alpha virt. eigenvalues -- 3.13410 3.13810 3.14743 3.16536 3.17631
Alpha virt. eigenvalues -- 3.18323 3.18385 3.19614 3.19730 3.20440
Alpha virt. eigenvalues -- 3.21492 3.21648 3.22448 3.23722 3.26710
Alpha virt. eigenvalues -- 3.27865 3.29179 3.30216 3.30549 3.32499
Alpha virt. eigenvalues -- 3.32991 3.33369 3.34109 3.34691 3.34968
Alpha virt. eigenvalues -- 3.35454 3.37150 3.39864 3.40221 3.40764
Alpha virt. eigenvalues -- 3.41106 3.41650 3.43357 3.44953 3.46275
Alpha virt. eigenvalues -- 3.46470 3.46914 3.47163 3.48163 3.49158
Alpha virt. eigenvalues -- 3.49566 3.51555 3.52168 3.54135 3.54703
Alpha virt. eigenvalues -- 3.57512 3.59423 3.60556 3.60928 3.61917
Alpha virt. eigenvalues -- 3.62322 3.65919 3.67523 3.69275 3.76760
Alpha virt. eigenvalues -- 3.77580 3.78112 3.78799 3.79556 3.80749
Alpha virt. eigenvalues -- 3.81489 3.82616 3.83307 3.86780 3.89655
Alpha virt. eigenvalues -- 3.91458 3.92858 3.93336 3.95797 3.96745
Alpha virt. eigenvalues -- 3.98516 3.99597 3.99760 4.00173 4.00636
Alpha virt. eigenvalues -- 4.00956 4.02937 4.05264 4.08953 4.11425
Alpha virt. eigenvalues -- 4.12125 4.13521 4.16857 4.17513 4.19545
Alpha virt. eigenvalues -- 4.22800 4.25354 4.29049 4.31041 4.32250
Alpha virt. eigenvalues -- 4.35697 4.45183 4.46336 4.50552 4.52756
Alpha virt. eigenvalues -- 4.61879 4.80400 4.81698 4.83066 4.83769
Alpha virt. eigenvalues -- 4.84832 5.03154 5.05198 5.08175 5.19027
Alpha virt. eigenvalues -- 5.25875 5.35438 5.51485 5.52279 13.98989
Alpha virt. eigenvalues -- 23.37130 23.49780 23.50772 23.66397 23.69901
Alpha virt. eigenvalues -- 23.70068 23.70968 23.80859 23.84069 23.85022
Alpha virt. eigenvalues -- 23.87776 23.88740 23.88931 23.90037 23.90512
Alpha virt. eigenvalues -- 23.90794 23.91086 23.91986 23.93129 23.94465
Alpha virt. eigenvalues -- 23.96473 24.00784 24.01526 24.02065 24.02275
Alpha virt. eigenvalues -- 24.08947 24.10504 24.10702 24.11272 24.13102
Alpha virt. eigenvalues -- 24.14228 24.15162 24.15582 24.16828 24.17574
Alpha virt. eigenvalues -- 24.19728 24.24444 24.27253 24.38958 35.60536
Alpha virt. eigenvalues -- 35.62306 49.94772 49.96310
Condensed to atoms (all electrons):
Mulliken charges:
1
1 C 0.201824
2 C -0.017084
3 C -0.027048
4 C 0.197550
5 C -0.101049
6 C -0.049428
7 C -0.060112
8 C -0.060645
9 C -0.058588
10 C -0.060550
11 C -0.052700
12 C -0.075708
13 C -0.075213
14 C -0.106455
15 B 0.766038
16 O -0.583042
17 O -0.566335
18 C -0.100834
19 C -0.073438
20 C -0.107489
21 C -0.107345
22 C -0.107231
23 C -0.073033
24 H 0.122441
25 H 0.109141
26 H 0.107954
27 H 0.105652
28 H 0.106211
29 H 0.112227
30 H 0.119228
31 H 0.120323
32 H 0.112004
33 H 0.111424
34 H 0.112640
35 H 0.121243
36 C -0.163878
37 C -0.071216
38 C 0.292364
39 N -0.447995
40 C -0.249515
41 N -0.455400
42 C -0.244647
43 C -0.218973
44 C -0.086710
45 C -0.100332
46 C -0.036211
47 C -0.229747
48 C -0.264785
49 C 0.051456
50 C 0.042813
51 C -0.107593
52 C -0.131688
53 C 0.074508
54 C 0.165500
55 C -0.090751
56 C -0.132572
57 H 0.151234
58 H 0.120043
59 H 0.128032
60 H 0.122223
61 H 0.123049
62 H 0.087164
63 H 0.103451
64 H 0.161167
65 H 0.112062
66 H 0.137126
67 H 0.151661
68 H 0.121537
69 H 0.117443
70 H 0.123412
71 H 0.140922
72 H 0.123132
73 H 0.114336
74 H 0.090851
75 H 0.113956
Sum of Mulliken charges = -0.00000
Mulliken charges with hydrogens summed into heavy atoms:
1
1 C 0.201824
2 C -0.017084
3 C -0.027048
4 C 0.197550
5 C 0.021392
6 C 0.059714
7 C -0.060112
8 C -0.060645
9 C -0.058588
10 C -0.060550
11 C 0.055253
12 C 0.029944
13 C 0.030998
14 C 0.005771
15 B 0.766038
16 O -0.583042
17 O -0.566335
18 C 0.018394
19 C 0.046884
20 C 0.004515
21 C 0.004079
22 C 0.005410
23 C 0.048210
36 C -0.012644
37 C 0.048827
38 C 0.292364
39 N -0.447995
40 C 0.123789
41 N -0.455400
42 C 0.107135
43 C 0.181876
44 C 0.034827
45 C 0.017112
46 C 0.087201
47 C -0.229747
48 C 0.113605
49 C 0.051456
50 C 0.042813
51 C -0.107593
52 C -0.040838
53 C 0.074508
54 C 0.165500
55 C 0.023204
56 C -0.132572
Electronic spatial extent (au): <R**2>= 25365.1507
Charge= -0.0000 electrons
Dipole moment (field-independent basis, Debye):
X= 5.5411 Y= -2.5211 Z= 2.0305 Tot= 6.4174
Quadrupole moment (field-independent basis, Debye-Ang):
XX= -197.8002 YY= -228.7471 ZZ= -254.7904
XY= -8.8810 XZ= 2.8173 YZ= -0.6123
Traceless Quadrupole moment (field-independent basis, Debye-Ang):
XX= 29.3123 YY= -1.6345 ZZ= -27.6778
XY= -8.8810 XZ= 2.8173 YZ= -0.6123
Octapole moment (field-independent basis, Debye-Ang**2):
XXX= 220.6850 YYY= -13.0651 ZZZ= 11.4637 XYY= -41.4385
XXY= -34.1649 XXZ= 6.8701 XZZ= 22.8934 YZZ= -24.4486
YYZ= 16.4750 XYZ= -60.1242
Hexadecapole moment (field-independent basis, Debye-Ang**3):
XXXX= -22203.7878 YYYY= -5787.0406 ZZZZ= -3656.7639 XXXY= -351.4610
XXXZ= -141.9320 YYYX= -43.1513 YYYZ= 75.0824 ZZZX= 21.4573
ZZZY= -42.6088 XXYY= -5155.9948 XXZZ= -4483.1508 YYZZ= -1599.8782
XXYZ= 121.2540 YYXZ= 64.7595 ZZXY= -13.7170
N-N= 5.042498980929D+03 E-N=-1.424956144119D+04 KE= 1.781960352780D+03
No NMR shielding tensors so no spin-rotation constants.
Leave Link 601 at Wed May 17 23:37:38 2023, MaxMem= 4294967296 cpu: 26.8
(Enter /public/apps/gs/g09/l701.exe)
Compute integral first derivatives.
... and contract with generalized density number 0.
R6Disp: Adding Grimme-D3(BJ) dispersion energy 1st derivatives to the gradient.
D1PCM: PCM CHGder 1st derivatives, ID1Alg=3 FixD1E=F DoIter=F DoCFld=F I1PDM=0.
GePol: Maximum number of non-zero 1st derivatives = 204
Leave Link 701 at Wed May 17 23:37:43 2023, MaxMem= 4294967296 cpu: 167.5
(Enter /public/apps/gs/g09/l702.exe)
L702 exits ... SP integral derivatives will be done elsewhere.
Leave Link 702 at Wed May 17 23:37:43 2023, MaxMem= 4294967296 cpu: 0.5
(Enter /public/apps/gs/g09/l703.exe)
Compute integral first derivatives, UseDBF=F ICtDFT= 0.
Integral derivatives from FoFJK, PRISM(SPDF).
Calling FoFJK, ICntrl= 2127 FMM=T ISym2X=0 I1Cent= 0 IOpClX= 0 NMat=1 NMatS=1 NMatT=0.
FoFJK: IHMeth= 1 ICntrl= 2127 DoSepK=F KAlg= 0 I1Cent= 0 FoldK=F
IRaf= 0 NMat= 1 IRICut= 1 DoRegI=T DoRafI=F ISym2E= 0.
FoFCou: FMM=T IPFlag= 0 FMFlag= 100000 FMFlg1= 2001
NFxFlg= 0 DoJE=F BraDBF=F KetDBF=F FulRan=T
wScrn= 0.000000 ICntrl= 2127 IOpCl= 0 I1Cent= 0 NGrid= 0
NMat0= 1 NMatS0= 1 NMatT0= 0 NMatD0= 1 NMtDS0= 0 NMtDT0= 0
Symmetry not used in FoFCou.
FMM levels: 10 Number of levels for PrismC: 9
Leave Link 703 at Wed May 17 23:38:14 2023, MaxMem= 4294967296 cpu: 981.9
(Enter /public/apps/gs/g09/l716.exe)
Dipole = 2.18004491D+00-9.91871473D-01 7.98869716D-01
***** Axes restored to original set *****
-------------------------------------------------------------------
Center Atomic Forces (Hartrees/Bohr)
Number Number X Y Z
-------------------------------------------------------------------
1 6 -0.033246223 0.025528436 0.003734187
2 6 -0.014203022 0.004159103 -0.003307755
3 6 0.009013037 0.003408511 0.010832602
4 6 0.012633896 0.025381043 0.035226672
5 6 -0.010950046 0.005476803 0.015418266
6 6 0.000022988 -0.002644757 0.000630612
7 6 0.016137003 -0.005337786 0.017092374
8 6 -0.008225759 0.003510240 -0.011683513
9 6 0.010101011 -0.006142402 0.009824786
10 6 -0.017356611 0.006117064 -0.016785888
11 6 0.001070024 0.001522053 -0.001524834
12 6 -0.002407916 -0.000081122 -0.002686206
13 6 0.003794676 -0.001423657 0.001274572
14 6 0.006695343 -0.003690731 -0.003004213
15 5 0.021592041 -0.055632560 -0.039470304
16 8 0.075271065 0.070867952 -0.070078639
17 8 -0.065521429 -0.081291404 0.003345162
18 6 -0.003201502 0.017946514 0.006233585
19 6 0.006946550 -0.001425060 0.006493633
20 6 0.001548193 -0.006287775 -0.000146692
21 6 -0.001649694 -0.006032587 -0.006531963
22 6 0.002254953 -0.000253903 -0.005234248
23 6 -0.006813087 0.001697324 -0.006416484
24 1 0.000654223 -0.000526398 -0.010572210
25 1 -0.006890391 0.003377183 -0.008286967
26 1 0.006929138 -0.003961909 0.007649998
27 1 0.006823646 -0.000559002 0.008069039
28 1 -0.008775235 0.003394858 -0.005579591
29 1 -0.009498175 0.004162174 0.002585188
30 1 0.005842703 -0.009364785 0.001383254
31 1 -0.007966950 0.004423980 -0.008707395
32 1 -0.004248846 0.009716864 -0.000070635
33 1 0.003399765 0.006703637 0.007663968
34 1 -0.001969389 0.001027031 0.010260003
35 1 0.007600697 -0.003718983 0.009264520
36 6 0.005016263 0.017784272 0.027894740
37 6 0.006341079 0.008903306 0.004259472
38 6 0.038915633 -0.008899064 -0.067669782
39 7 0.035604613 0.000890277 -0.086694979
40 6 0.000975459 0.005133784 0.002508879
41 7 -0.060714995 -0.021195072 0.070215812
42 6 -0.004600974 -0.024024451 0.023472979
43 6 -0.011994773 0.009819775 -0.015113991
44 6 -0.005572921 0.006906014 0.004320120
45 6 -0.007784731 -0.008417307 0.003723877
46 6 -0.015544522 -0.004022275 0.011585632
47 6 -0.061019194 0.060971091 0.054440059
48 6 0.019378780 0.005744888 -0.002262623
49 6 0.020233707 0.036771330 -0.081495804
50 6 0.025635904 -0.062703886 0.054353252
51 6 -0.002875837 0.001697628 0.028781236
52 6 0.004340019 0.000454219 0.015143288
53 6 0.011847853 -0.015316640 0.006109891
54 6 0.034741059 0.010079405 -0.071069095
55 6 0.032745018 -0.022886428 -0.004599609
56 6 -0.033301008 0.003730973 0.052232732
57 1 -0.002591961 -0.008190106 0.015771109
58 1 -0.001405836 -0.011007282 0.000103780
59 1 0.007503079 -0.013037624 0.012718035
60 1 0.008652684 0.006580724 -0.006286527
61 1 -0.012134799 0.000765977 -0.000313774
62 1 -0.010513470 0.006061114 -0.005104616
63 1 0.011031948 0.000918689 0.001969257
64 1 -0.025793092 -0.014680070 0.036773756
65 1 0.000184485 -0.009327012 0.008465049
66 1 0.006879744 0.011424137 0.001457734
67 1 -0.018076807 -0.004524890 -0.036851145
68 1 0.006843026 -0.006294241 -0.005189575
69 1 0.007979174 0.004214236 -0.005712104
70 1 0.002311263 0.012068297 -0.001015345
71 1 -0.008742778 0.020096655 -0.011454479
72 1 0.008358610 0.004644500 0.009453228
73 1 -0.008414294 -0.005791504 -0.002410827
74 1 -0.005984637 0.004780209 -0.010061630
75 1 0.006140554 -0.010169600 0.010657101
-------------------------------------------------------------------
Cartesian Forces: Max 0.086694979 RMS 0.022638053
Leave Link 716 at Wed May 17 23:38:14 2023, MaxMem= 4294967296 cpu: 0.8
(Enter /public/apps/gs/g09/l103.exe)
GradGradGradGradGradGradGradGradGradGradGradGradGradGradGradGradGradGrad
Berny optimization.
FormGI is forming the generalized inverse of G from B-inverse, IUseBI=4.
GSVD: received Info= 1 from GESDD.
Internal Forces: Max 0.140647839 RMS 0.022483784
Search for a local minimum.
Step number 1 out of a maximum of 427
All quantities printed in internal units (Hartrees-Bohrs-Radians)
RMS Force = .22484D-01 SwitMx=.10000D-02 MixMth= 1
Mixed Optimization -- RFO/linear search
Second derivative matrix not updated -- first step.
ITU= 0
Eigenvalues --- 0.00230 0.00230 0.00788 0.00797 0.00804
Eigenvalues --- 0.00805 0.00810 0.01100 0.01324 0.01380
Eigenvalues --- 0.01395 0.01436 0.01447 0.01452 0.01544
Eigenvalues --- 0.01600 0.01694 0.01748 0.01754 0.01795
Eigenvalues --- 0.01797 0.01806 0.01807 0.01861 0.01935
Eigenvalues --- 0.01961 0.01968 0.01971 0.01976 0.02032
Eigenvalues --- 0.02038 0.02043 0.02055 0.02064 0.02068
Eigenvalues --- 0.02068 0.02098 0.02114 0.02122 0.02130
Eigenvalues --- 0.02152 0.02153 0.02154 0.02158 0.02160
Eigenvalues --- 0.02162 0.02163 0.02164 0.02167 0.02175
Eigenvalues --- 0.02184 0.02188 0.02223 0.02244 0.02263
Eigenvalues --- 0.02269 0.02392 0.02401 0.02540 0.02919
Eigenvalues --- 0.02920 0.02923 0.02931 0.05840 0.06297
Eigenvalues --- 0.07054 0.07552 0.07554 0.07555 0.07560
Eigenvalues --- 0.07565 0.07567 0.10432 0.11022 0.12428
Eigenvalues --- 0.13800 0.14285 0.16000 0.16000 0.16000
Eigenvalues --- 0.16000 0.16000 0.16000 0.16000 0.16000
Eigenvalues --- 0.16000 0.16000 0.16000 0.16000 0.16000
Eigenvalues --- 0.16000 0.16000 0.16000 0.16000 0.16000
Eigenvalues --- 0.16000 0.16000 0.16000 0.16000 0.16000
Eigenvalues --- 0.16000 0.16000 0.16000 0.16000 0.16000
Eigenvalues --- 0.16000 0.16125 0.18340 0.21532 0.21997
Eigenvalues --- 0.21998 0.22000 0.22000 0.22371 0.22412
Eigenvalues --- 0.22661 0.22733 0.23234 0.23486 0.23784
Eigenvalues --- 0.23794 0.24347 0.24365 0.24380 0.24672
Eigenvalues --- 0.24676 0.24946 0.24950 0.25000 0.25000
Eigenvalues --- 0.25000 0.25000 0.25000 0.25000 0.25000
Eigenvalues --- 0.25000 0.25000 0.25000 0.25000 0.25000
Eigenvalues --- 0.29895 0.30304 0.32207 0.32218 0.32226
Eigenvalues --- 0.32256 0.32260 0.32269 0.32272 0.32302
Eigenvalues --- 0.32302 0.32303 0.32324 0.32328 0.32354
Eigenvalues --- 0.32475 0.32623 0.32679 0.32689 0.32729
Eigenvalues --- 0.33596 0.33606 0.33619 0.33624 0.33631
Eigenvalues --- 0.33634 0.33653 0.33653 0.33662 0.33670
Eigenvalues --- 0.33684 0.33693 0.33693 0.33694 0.33704
Eigenvalues --- 0.33704 0.33719 0.33723 0.33746 0.33751
Eigenvalues --- 0.36426 0.37658 0.37717 0.38573 0.38648
Eigenvalues --- 0.39085 0.39138 0.40177 0.40198 0.40855
Eigenvalues --- 0.41457 0.41476 0.41734 0.41807 0.42125
Eigenvalues --- 0.42367 0.43151 0.43279 0.44039 0.45053
Eigenvalues --- 0.46017 0.46407 0.46456 0.46524 0.46627
Eigenvalues --- 0.48129 0.48140 0.48197 0.49071 0.49150
Eigenvalues --- 0.49530 0.49613 0.49803 0.50610 0.56084
Eigenvalues --- 0.57828 0.57840 0.58038 0.65164
RFO step: Lambda=-3.65724363D-01 EMin= 2.30000000D-03
Linear search not attempted -- first point.
Maximum step size ( 0.300) exceeded in Quadratic search.
-- Step size scaled by 0.490
Iteration 1 RMS(Cart)= 0.29788880 RMS(Int)= 0.00866008
Iteration 2 RMS(Cart)= 0.11459353 RMS(Int)= 0.00098197
Iteration 3 RMS(Cart)= 0.00300613 RMS(Int)= 0.00011129
Iteration 4 RMS(Cart)= 0.00000240 RMS(Int)= 0.00011128
Iteration 5 RMS(Cart)= 0.00000000 RMS(Int)= 0.00011128
ITry= 1 IFail=0 DXMaxC= 1.64D+00 DCOld= 1.00D+10 DXMaxT= 3.00D-01 DXLimC= 3.00D+00 Rises=F
Variable Old X -DE/DX Delta X Delta X Delta X New X
(Linear) (Quad) (Total)
R1 2.61377 -0.01368 0.00000 -0.00791 -0.00793 2.60584
R2 2.68836 -0.01054 0.00000 -0.00700 -0.00699 2.68138
R3 2.85717 -0.06505 0.00000 -0.04726 -0.04723 2.80994
R4 2.82244 -0.01461 0.00000 -0.00962 -0.00966 2.81278
R5 2.70945 -0.00213 0.00000 -0.00139 -0.00139 2.70807
R6 2.61391 -0.02046 0.00000 -0.01205 -0.01209 2.60182
R7 2.71047 -0.00215 0.00000 -0.00136 -0.00136 2.70910
R8 2.85826 -0.07613 0.00000 -0.05563 -0.05565 2.80261
R9 2.68647 -0.01066 0.00000 -0.00706 -0.00705 2.67942
R10 2.59590 -0.00349 0.00000 -0.00195 -0.00195 2.59395
R11 2.07761 -0.01049 0.00000 -0.00731 -0.00731 2.07030
R12 2.69397 -0.00405 0.00000 -0.00208 -0.00209 2.69188
R13 2.07970 -0.01122 0.00000 -0.00783 -0.00783 2.07187
R14 2.66128 0.01303 0.00000 0.00850 0.00849 2.66977
R15 2.69735 -0.00539 0.00000 -0.00328 -0.00328 2.69407
R16 2.70157 -0.00546 0.00000 -0.00337 -0.00337 2.69820
R17 2.65986 0.01369 0.00000 0.00890 0.00888 2.66874
R18 2.70223 -0.00586 0.00000 -0.00362 -0.00362 2.69861
R19 2.69410 -0.00360 0.00000 -0.00182 -0.00183 2.69227
R20 2.69847 -0.00568 0.00000 -0.00346 -0.00346 2.69501
R21 2.59663 -0.00387 0.00000 -0.00219 -0.00219 2.59444
R22 2.07904 -0.01097 0.00000 -0.00765 -0.00765 2.07139
R23 2.59631 -0.00152 0.00000 -0.00093 -0.00093 2.59538
R24 2.07851 -0.01034 0.00000 -0.00721 -0.00721 2.07130
R25 2.59725 -0.00213 0.00000 -0.00128 -0.00127 2.59598
R26 2.07952 -0.01069 0.00000 -0.00746 -0.00746 2.07205
R27 2.68348 -0.00290 0.00000 -0.00198 -0.00198 2.68150
R28 2.07890 -0.01065 0.00000 -0.00743 -0.00743 2.07147
R29 3.26337 -0.07317 0.00000 -0.06739 -0.06733 3.19603
R30 3.31722 -0.06177 0.00000 -0.05850 -0.05847 3.25875
R31 2.90407 0.03759 0.00000 0.03919 0.03919 2.94326
R32 2.07977 -0.01093 0.00000 -0.00763 -0.00763 2.07214
R33 2.59762 -0.00191 0.00000 -0.00118 -0.00118 2.59644
R34 2.07957 -0.01256 0.00000 -0.00877 -0.00877 2.07080
R35 2.68149 -0.00215 0.00000 -0.00152 -0.00152 2.67997
R36 2.07850 -0.01058 0.00000 -0.00738 -0.00738 2.07112
R37 2.07920 -0.01071 0.00000 -0.00747 -0.00747 2.07173
R38 2.59835 -0.00244 0.00000 -0.00148 -0.00148 2.59687
R39 2.07806 -0.01048 0.00000 -0.00731 -0.00731 2.07076
R40 2.07919 -0.01251 0.00000 -0.00873 -0.00873 2.07046
R41 2.63661 -0.00248 0.00000 -0.00147 -0.00146 2.63515
R42 2.63430 0.01105 0.00000 0.00668 0.00669 2.64100
R43 2.07832 -0.01333 0.00000 -0.00930 -0.00930 2.06902
R44 2.63642 -0.00282 0.00000 -0.00184 -0.00185 2.63456
R45 2.08017 -0.01110 0.00000 -0.00775 -0.00775 2.07242
R46 2.52701 0.14065 0.00000 0.07301 0.07301 2.60003
R47 2.52528 0.06955 0.00000 0.03602 0.03602 2.56130
R48 2.52692 0.10399 0.00000 0.05397 0.05397 2.58090
R49 2.59003 0.07048 0.00000 0.04113 0.04117 2.63120
R50 2.58856 0.05415 0.00000 0.03146 0.03152 2.62008
R51 2.83018 0.00621 0.00000 0.00440 0.00440 2.83458
R52 2.10355 -0.01827 0.00000 -0.01301 -0.01301 2.09054
R53 2.10249 -0.01161 0.00000 -0.00826 -0.00826 2.09423
R54 2.10292 -0.01157 0.00000 -0.00823 -0.00823 2.09469
R55 2.79356 -0.01639 0.00000 -0.01131 -0.01139 2.78217
R56 2.45059 0.04029 0.00000 0.01895 0.01891 2.46950
R57 2.82919 0.01322 0.00000 0.00936 0.00936 2.83854
R58 2.10377 -0.01062 0.00000 -0.00756 -0.00756 2.09621
R59 2.10446 -0.01056 0.00000 -0.00752 -0.00752 2.09694
R60 2.10255 -0.01508 0.00000 -0.01072 -0.01072 2.09183
R61 2.82830 0.01338 0.00000 0.00946 0.00946 2.83775
R62 2.10370 -0.01227 0.00000 -0.00873 -0.00873 2.09497
R63 2.10467 -0.01215 0.00000 -0.00866 -0.00866 2.09601
R64 2.10295 -0.03618 0.00000 -0.02574 -0.02574 2.07721
R65 2.63431 -0.00160 0.00000 -0.00111 -0.00113 2.63318
R66 2.07866 -0.01064 0.00000 -0.00742 -0.00742 2.07124
R67 2.63544 -0.00407 0.00000 -0.00240 -0.00240 2.63304
R68 2.07832 -0.01067 0.00000 -0.00744 -0.00744 2.07088
R69 2.63703 0.01397 0.00000 0.00843 0.00844 2.64547
R70 2.07999 -0.01227 0.00000 -0.00857 -0.00857 2.07143
R71 2.82901 0.00847 0.00000 0.00600 0.00600 2.83501
R72 2.10432 -0.02332 0.00000 -0.01661 -0.01661 2.08771
R73 2.10296 -0.01305 0.00000 -0.00929 -0.00929 2.09367
R74 2.10200 -0.00880 0.00000 -0.00626 -0.00626 2.09575
R75 2.81415 0.02387 0.00000 0.01654 0.01653 2.83068
R76 2.60360 0.02003 0.00000 0.01127 0.01124 2.61483
R77 2.67399 -0.02271 0.00000 -0.01582 -0.01589 2.65809
R78 2.60327 0.00843 0.00000 0.00389 0.00388 2.60716
R79 2.07801 -0.01248 0.00000 -0.00870 -0.00870 2.06931
R80 2.75464 -0.02709 0.00000 -0.01786 -0.01781 2.73683
R81 2.51604 0.04092 0.00000 0.02092 0.02099 2.53703
R82 2.07852 -0.01547 0.00000 -0.01079 -0.01079 2.06773
A1 2.08769 0.01308 0.00000 0.01023 0.01022 2.09791
A2 2.09753 0.00022 0.00000 -0.00155 -0.00151 2.09602
A3 2.09795 -0.01330 0.00000 -0.00866 -0.00870 2.08925
A4 2.06852 -0.00758 0.00000 -0.00709 -0.00711 2.06141
A5 2.09734 -0.00442 0.00000 -0.00364 -0.00363 2.09371
A6 2.11665 0.01208 0.00000 0.01085 0.01085 2.12749
A7 2.06696 -0.00704 0.00000 -0.00579 -0.00581 2.06115
A8 2.11641 0.01168 0.00000 0.00984 0.00984 2.12625
A9 2.09924 -0.00470 0.00000 -0.00414 -0.00413 2.09511
A10 2.09761 -0.00537 0.00000 -0.00549 -0.00548 2.09213
A11 2.08625 0.01517 0.00000 0.01175 0.01176 2.09801
A12 2.09932 -0.00980 0.00000 -0.00626 -0.00628 2.09305
A13 2.11156 -0.00531 0.00000 -0.00524 -0.00523 2.10633
A14 2.08548 0.00109 0.00000 0.00116 0.00115 2.08663
A15 2.08614 0.00423 0.00000 0.00408 0.00408 2.09022
A16 2.09802 0.00130 0.00000 0.00149 0.00148 2.09950
A17 2.09238 0.00020 0.00000 0.00004 0.00005 2.09243
A18 2.09278 -0.00150 0.00000 -0.00154 -0.00153 2.09125
A19 2.08353 -0.00137 0.00000 -0.00039 -0.00041 2.08312
A20 2.10414 0.00435 0.00000 0.00276 0.00277 2.10691
A21 2.09541 -0.00297 0.00000 -0.00236 -0.00235 2.09305
A22 2.08501 -0.00349 0.00000 -0.00271 -0.00272 2.08230
A23 2.13476 0.00336 0.00000 0.00232 0.00233 2.13709
A24 2.06276 0.00017 0.00000 0.00044 0.00044 2.06320
A25 2.08299 -0.00322 0.00000 -0.00229 -0.00230 2.08070
A26 2.13673 0.00311 0.00000 0.00198 0.00199 2.13872
A27 2.06290 0.00013 0.00000 0.00032 0.00032 2.06323
A28 2.08497 -0.00214 0.00000 -0.00090 -0.00092 2.08405
A29 2.09506 -0.00276 0.00000 -0.00221 -0.00221 2.09286
A30 2.10306 0.00490 0.00000 0.00311 0.00313 2.10619
A31 2.09705 0.00060 0.00000 0.00100 0.00099 2.09804
A32 2.09369 -0.00132 0.00000 -0.00145 -0.00145 2.09224
A33 2.09245 0.00072 0.00000 0.00045 0.00046 2.09290
A34 2.10092 0.00097 0.00000 0.00096 0.00096 2.10188
A35 2.09130 -0.00282 0.00000 -0.00266 -0.00266 2.08864
A36 2.09096 0.00185 0.00000 0.00170 0.00170 2.09266
A37 2.10101 0.00101 0.00000 0.00097 0.00097 2.10198
A38 2.09158 -0.00288 0.00000 -0.00270 -0.00270 2.08888
A39 2.09059 0.00187 0.00000 0.00173 0.00173 2.09233
A40 2.09330 0.00080 0.00000 0.00041 0.00041 2.09371
A41 2.09525 0.00020 0.00000 0.00035 0.00035 2.09560
A42 2.09464 -0.00100 0.00000 -0.00076 -0.00077 2.09387
A43 1.66574 -0.01124 0.00000 -0.01079 -0.01051 1.65523
A44 2.08721 0.01107 0.00000 0.01244 0.01232 2.09953
A45 1.59595 0.01372 0.00000 0.01756 0.01729 1.61324
A46 2.38766 -0.00580 0.00000 -0.00395 -0.00444 2.38322
A47 2.01216 0.01889 0.00000 0.01696 0.01701 2.02917
A48 2.11263 -0.00589 0.00000 -0.00561 -0.00560 2.10703
A49 2.08549 0.00080 0.00000 0.00080 0.00080 2.08629
A50 2.08506 0.00509 0.00000 0.00481 0.00480 2.08986
A51 2.11185 -0.00086 0.00000 -0.00064 -0.00064 2.11121
A52 2.08599 -0.00055 0.00000 -0.00060 -0.00059 2.08540
A53 2.08534 0.00141 0.00000 0.00124 0.00124 2.08658
A54 2.10009 0.00192 0.00000 0.00131 0.00132 2.10140
A55 2.09154 -0.00080 0.00000 -0.00051 -0.00051 2.09103
A56 2.09156 -0.00112 0.00000 -0.00081 -0.00081 2.09075
A57 2.09368 0.00063 0.00000 0.00028 0.00028 2.09396
A58 2.09480 0.00032 0.00000 0.00045 0.00045 2.09525
A59 2.09471 -0.00095 0.00000 -0.00073 -0.00073 2.09398
A60 2.09972 0.00201 0.00000 0.00138 0.00138 2.10110
A61 2.09173 -0.00119 0.00000 -0.00086 -0.00086 2.09087
A62 2.09174 -0.00082 0.00000 -0.00052 -0.00052 2.09122
A63 2.11205 -0.00096 0.00000 -0.00075 -0.00076 2.11129
A64 2.08611 -0.00045 0.00000 -0.00049 -0.00049 2.08562
A65 2.08503 0.00141 0.00000 0.00125 0.00125 2.08628
A66 2.09469 0.00753 0.00000 0.00642 0.00643 2.10112
A67 2.09366 -0.00167 0.00000 -0.00126 -0.00129 2.09238
A68 2.09483 -0.00585 0.00000 -0.00515 -0.00518 2.08965
A69 2.09408 0.00152 0.00000 0.00090 0.00090 2.09498
A70 2.09416 -0.00081 0.00000 -0.00050 -0.00050 2.09366
A71 2.09495 -0.00071 0.00000 -0.00040 -0.00040 2.09455
A72 2.09470 0.08981 0.00000 0.07147 0.07141 2.16611
A73 2.09361 -0.06060 0.00000 -0.04823 -0.04828 2.04533
A74 2.09487 -0.02922 0.00000 -0.02326 -0.02331 2.07156
A75 1.90863 -0.04259 0.00000 -0.02927 -0.02921 1.87941
A76 1.91083 0.00978 0.00000 0.00926 0.00924 1.92007
A77 1.91009 0.00456 0.00000 0.00423 0.00421 1.91430
A78 1.90999 0.00195 0.00000 0.00171 0.00170 1.91169
A79 1.91052 -0.00564 0.00000 -0.00504 -0.00506 1.90546
A80 1.91120 -0.00546 0.00000 -0.00503 -0.00504 1.90616
A81 1.91117 -0.00519 0.00000 -0.00512 -0.00512 1.90605
A82 1.81003 0.03159 0.00000 0.02478 0.02453 1.83456
A83 1.91107 -0.04660 0.00000 -0.04464 -0.04456 1.86650
A84 1.90949 0.03300 0.00000 0.03212 0.03233 1.94182
A85 1.91090 0.02790 0.00000 0.02680 0.02679 1.93769
A86 1.90962 -0.00080 0.00000 -0.00233 -0.00196 1.90766
A87 1.91142 0.02876 0.00000 0.02899 0.02932 1.94074
A88 1.91130 -0.04230 0.00000 -0.04098 -0.04117 1.87014
A89 1.91147 -0.00620 0.00000 -0.00626 -0.00625 1.90522
A90 1.90981 0.00480 0.00000 0.00463 0.00456 1.91437
A91 1.91096 0.02581 0.00000 0.02439 0.02433 1.93529
A92 1.91029 -0.00394 0.00000 -0.00434 -0.00434 1.90595
A93 1.91080 -0.01197 0.00000 -0.01147 -0.01144 1.89936
A94 1.91047 -0.00850 0.00000 -0.00695 -0.00709 1.90338
A95 2.09442 -0.00052 0.00000 -0.00104 -0.00106 2.09336
A96 2.09357 0.00020 0.00000 0.00047 0.00048 2.09405
A97 2.09519 0.00031 0.00000 0.00057 0.00058 2.09577
A98 2.09470 0.00024 0.00000 -0.00015 -0.00016 2.09454
A99 2.09483 -0.00005 0.00000 0.00014 0.00015 2.09498
A100 2.09365 -0.00020 0.00000 0.00000 0.00001 2.09366
A101 2.09444 0.00859 0.00000 0.00733 0.00735 2.10179
A102 2.09541 -0.00315 0.00000 -0.00260 -0.00261 2.09280
A103 2.09334 -0.00544 0.00000 -0.00473 -0.00474 2.08859
A104 2.09429 0.02645 0.00000 0.02087 0.02079 2.11508
A105 2.09404 -0.01737 0.00000 -0.01346 -0.01348 2.08056
A106 2.09485 -0.00906 0.00000 -0.00739 -0.00746 2.08739
A107 1.91024 0.01204 0.00000 0.01158 0.01156 1.92180
A108 1.90976 0.00267 0.00000 0.00243 0.00241 1.91217
A109 1.91164 -0.00438 0.00000 -0.00437 -0.00436 1.90727
A110 1.90971 -0.00331 0.00000 -0.00251 -0.00255 1.90716
A111 1.91068 -0.00294 0.00000 -0.00261 -0.00261 1.90807
A112 1.91177 -0.00407 0.00000 -0.00449 -0.00450 1.90728
A113 2.22852 -0.10577 0.00000 -0.08391 -0.08384 2.14468
A114 2.22915 0.10430 0.00000 0.08328 0.08335 2.31250
A115 1.82551 0.00146 0.00000 0.00063 0.00048 1.82600
A116 2.19987 0.02415 0.00000 0.01849 0.01852 2.21840
A117 2.19909 -0.03851 0.00000 -0.03138 -0.03135 2.16774
A118 1.88422 0.01436 0.00000 0.01289 0.01283 1.89704
A119 2.20435 0.01601 0.00000 0.01417 0.01425 2.21860
A120 2.20510 -0.01320 0.00000 -0.00908 -0.00900 2.19611
A121 1.87373 -0.00281 0.00000 -0.00509 -0.00526 1.86847
A122 1.87292 0.02379 0.00000 0.01584 0.01560 1.88852
A123 2.20509 -0.01113 0.00000 -0.00720 -0.00723 2.19786
A124 2.20518 -0.01267 0.00000 -0.00864 -0.00866 2.19652
A125 2.19940 0.07691 0.00000 0.06128 0.06129 2.26069
A126 1.88528 0.00723 0.00000 0.00562 0.00559 1.89087
A127 2.19851 -0.08414 0.00000 -0.06690 -0.06689 2.13162
A128 2.11235 0.05274 0.00000 0.04202 0.04203 2.15438
A129 2.05963 -0.04166 0.00000 -0.03324 -0.03327 2.02635
A130 2.11121 -0.01109 0.00000 -0.00878 -0.00877 2.10244
A131 1.77952 0.04173 0.00000 0.03468 0.03474 1.81427
A132 2.25196 -0.02479 0.00000 -0.02100 -0.02104 2.23092
A133 2.25170 -0.01694 0.00000 -0.01368 -0.01371 2.23799
A134 2.16678 0.08439 0.00000 0.06742 0.06739 2.23418
A135 2.16631 -0.05125 0.00000 -0.04054 -0.04056 2.12576
A136 1.95009 -0.03314 0.00000 -0.02687 -0.02687 1.92322
A137 2.11087 -0.03118 0.00000 -0.02482 -0.02482 2.08605
D1 3.11357 -0.00740 0.00000 -0.00974 -0.00977 3.10381
D2 -0.06727 -0.00493 0.00000 -0.00623 -0.00626 -0.07353
D3 -0.03514 -0.00664 0.00000 -0.00831 -0.00833 -0.04347
D4 3.06720 -0.00417 0.00000 -0.00479 -0.00482 3.06238
D5 0.00418 0.00366 0.00000 0.00483 0.00485 0.00903
D6 -3.13753 0.00134 0.00000 0.00183 0.00185 -3.13567
D7 -3.13030 0.00284 0.00000 0.00337 0.00339 -3.12691
D8 0.01119 0.00053 0.00000 0.00037 0.00039 0.01158
D9 -1.34943 -0.00420 0.00000 -0.00541 -0.00526 -1.35469
D10 2.34150 -0.02174 0.00000 -0.03140 -0.03162 2.30988
D11 1.78500 -0.00333 0.00000 -0.00389 -0.00375 1.78125
D12 -0.80726 -0.02086 0.00000 -0.02988 -0.03011 -0.83737
D13 0.96981 -0.00742 0.00000 -0.00898 -0.00901 0.96080
D14 -2.13544 -0.00550 0.00000 -0.00604 -0.00605 -2.14150
D15 -2.13208 -0.00954 0.00000 -0.01219 -0.01224 -2.14432
D16 1.04585 -0.00761 0.00000 -0.00925 -0.00928 1.03657
D17 0.08816 0.00251 0.00000 0.00318 0.00318 0.09134
D18 -3.01390 0.00125 0.00000 0.00154 0.00153 -3.01237
D19 -3.09378 0.00459 0.00000 0.00637 0.00639 -3.08739
D20 0.08734 0.00333 0.00000 0.00474 0.00475 0.09209
D21 -0.03313 -0.00136 0.00000 -0.00016 -0.00018 -0.03331
D22 3.10893 -0.00143 0.00000 -0.00082 -0.00084 3.10809
D23 3.07250 -0.00292 0.00000 -0.00277 -0.00278 3.06971
D24 -0.06863 -0.00298 0.00000 -0.00343 -0.00344 -0.07207
D25 -3.09069 -0.00016 0.00000 -0.00078 -0.00080 -3.09149
D26 0.08734 -0.00067 0.00000 -0.00131 -0.00133 0.08601
D27 0.08790 0.00184 0.00000 0.00225 0.00224 0.09015
D28 -3.01724 0.00133 0.00000 0.00171 0.00171 -3.01553
D29 -1.41004 -0.00753 0.00000 -0.00884 -0.00884 -1.41888
D30 1.73109 -0.00745 0.00000 -0.00817 -0.00818 1.72291
D31 0.00570 0.00171 0.00000 0.00202 0.00203 0.00773
D32 -3.13760 0.00077 0.00000 0.00102 0.00103 -3.13657
D33 -3.13542 0.00164 0.00000 0.00137 0.00137 -3.13405
D34 0.00446 0.00070 0.00000 0.00036 0.00037 0.00483
D35 0.03815 -0.00025 0.00000 -0.00054 -0.00053 0.03762
D36 -3.10374 -0.00181 0.00000 -0.00241 -0.00240 -3.10614
D37 -3.10333 0.00206 0.00000 0.00245 0.00248 -3.10085
D38 0.03797 0.00050 0.00000 0.00059 0.00060 0.03857
D39 -0.01645 -0.00166 0.00000 -0.00214 -0.00215 -0.01860
D40 3.10887 -0.00103 0.00000 -0.00121 -0.00122 3.10765
D41 3.12544 -0.00010 0.00000 -0.00028 -0.00027 3.12517
D42 -0.03243 0.00053 0.00000 0.00065 0.00066 -0.03177
D43 -0.04579 0.00042 0.00000 0.00070 0.00070 -0.04509
D44 3.05790 0.00171 0.00000 0.00232 0.00232 3.06022
D45 3.11200 -0.00027 0.00000 -0.00027 -0.00027 3.11172
D46 -0.06750 0.00102 0.00000 0.00134 0.00135 -0.06615
D47 -3.09811 -0.00085 0.00000 -0.00121 -0.00121 -3.09932
D48 0.04306 -0.00094 0.00000 -0.00129 -0.00129 0.04177
D49 0.02710 -0.00021 0.00000 -0.00025 -0.00025 0.02685
D50 -3.11492 -0.00030 0.00000 -0.00033 -0.00033 -3.11525
D51 -3.11605 -0.00020 0.00000 -0.00023 -0.00023 -3.11628
D52 0.02483 0.00039 0.00000 0.00055 0.00055 0.02539
D53 0.06459 -0.00137 0.00000 -0.00178 -0.00178 0.06281
D54 -3.07771 -0.00078 0.00000 -0.00100 -0.00100 -3.07871
D55 -0.04411 -0.00024 0.00000 -0.00029 -0.00029 -0.04440
D56 3.11185 -0.00015 0.00000 -0.00011 -0.00012 3.11173
D57 3.06258 0.00031 0.00000 0.00026 0.00025 3.06284
D58 -0.06465 0.00040 0.00000 0.00043 0.00043 -0.06422
D59 -3.11733 -0.00023 0.00000 -0.00028 -0.00028 -3.11761
D60 0.02508 0.00004 0.00000 0.00004 0.00004 0.02512
D61 0.06030 -0.00066 0.00000 -0.00075 -0.00075 0.05955
D62 -3.08047 -0.00039 0.00000 -0.00043 -0.00043 -3.08090
D63 -0.01780 -0.00094 0.00000 -0.00113 -0.00113 -0.01893
D64 3.12308 0.00044 0.00000 0.00048 0.00049 3.12357
D65 3.10936 -0.00110 0.00000 -0.00135 -0.00136 3.10801
D66 -0.03294 0.00028 0.00000 0.00026 0.00026 -0.03267
D67 0.02863 -0.00011 0.00000 -0.00007 -0.00007 0.02855
D68 -3.11421 -0.00037 0.00000 -0.00043 -0.00043 -3.11465
D69 -3.09846 0.00004 0.00000 0.00013 0.00014 -3.09832
D70 0.04189 -0.00023 0.00000 -0.00022 -0.00022 0.04167
D71 0.03794 0.00038 0.00000 0.00036 0.00037 0.03831
D72 -3.10194 0.00132 0.00000 0.00136 0.00138 -3.10057
D73 -3.10294 -0.00100 0.00000 -0.00125 -0.00125 -3.10419
D74 0.04036 -0.00005 0.00000 -0.00025 -0.00024 0.04011
D75 0.01429 -0.00011 0.00000 -0.00010 -0.00010 0.01419
D76 -3.12680 -0.00048 0.00000 -0.00058 -0.00058 -3.12738
D77 -3.12606 0.00016 0.00000 0.00026 0.00027 -3.12579
D78 0.01604 -0.00021 0.00000 -0.00022 -0.00022 0.01582
D79 0.01881 -0.00045 0.00000 -0.00057 -0.00057 0.01824
D80 -3.12262 -0.00053 0.00000 -0.00063 -0.00063 -3.12325
[truncated: 133,075 more rows]

## Sheet: bodipy-ex-parallel-negative
Entering Gaussian System, Link 0=g09
Input=bodipy-ex-parallel-negative.gjf
Output=bodipy-ex-parallel-negative.log
Initial command:
/public/apps/gs/g09/l1.exe "/tmp/jianghao/scratch/14022.master/Gau-192354.inp" -scrdir="/tmp/jianghao/scratch/14022.master/"
Entering Link 1 = /public/apps/gs/g09/l1.exe PID= 192355.
Copyright (c) 1988,1990,1992,1993,1995,1998,2003,2009,2015,
Gaussian, Inc. All Rights Reserved.
This is part of the Gaussian(R) 09 program. It is based on
the Gaussian(R) 03 system (copyright 2003, Gaussian, Inc.),
the Gaussian(R) 98 system (copyright 1998, Gaussian, Inc.),
the Gaussian(R) 94 system (copyright 1995, Gaussian, Inc.),
the Gaussian 92(TM) system (copyright 1992, Gaussian, Inc.),
the Gaussian 90(TM) system (copyright 1990, Gaussian, Inc.),
the Gaussian 88(TM) system (copyright 1988, Gaussian, Inc.),
the Gaussian 86(TM) system (copyright 1986, Carnegie Mellon
University), and the Gaussian 82(TM) system (copyright 1983,
Carnegie Mellon University). Gaussian is a federally registered
trademark of Gaussian, Inc.
This software contains proprietary and confidential information,
including trade secrets, belonging to Gaussian, Inc.
This software is provided under written license and may be
used, copied, transmitted, or stored only in accord with that
written license.
The following legend is applicable only to US Government
contracts under FAR:
RESTRICTED RIGHTS LEGEND
Use, reproduction and disclosure by the US Government is
subject to restrictions as set forth in subparagraphs (a)
and (c) of the Commercial Computer Software - Restricted
Rights clause in FAR 52.227-19.
Gaussian, Inc.
340 Quinnipiac St., Bldg. 40, Wallingford CT 06492
---------------------------------------------------------------
Warning -- This program may not be used in any manner that
competes with the business of Gaussian, Inc. or will provide
assistance to any competitor of Gaussian, Inc. The licensee
of this program is prohibited from giving any competitor of
Gaussian, Inc. access to this program. By using this program,
the user acknowledges that Gaussian, Inc. is engaged in the
business of creating and licensing software in the field of
computational chemistry and represents and warrants to the
licensee that it is not a competitor of Gaussian, Inc. and that
it will not use this program in any manner prohibited above.
---------------------------------------------------------------
Cite this work as:
Gaussian 09, Revision E.01,
M. J. Frisch, G. W. Trucks, H. B. Schlegel, G. E. Scuseria,
M. A. Robb, J. R. Cheeseman, G. Scalmani, V. Barone, B. Mennucci,
G. A. Petersson, H. Nakatsuji, M. Caricato, X. Li, H. P. Hratchian,
A. F. Izmaylov, J. Bloino, G. Zheng, J. L. Sonnenberg, M. Hada,
M. Ehara, K. Toyota, R. Fukuda, J. Hasegawa, M. Ishida, T. Nakajima,
Y. Honda, O. Kitao, H. Nakai, T. Vreven, J. A. Montgomery, Jr.,
J. E. Peralta, F. Ogliaro, M. Bearpark, J. J. Heyd, E. Brothers,
K. N. Kudin, V. N. Staroverov, T. Keith, R. Kobayashi, J. Normand,
K. Raghavachari, A. Rendell, J. C. Burant, S. S. Iyengar, J. Tomasi,
M. Cossi, N. Rega, J. M. Millam, M. Klene, J. E. Knox, J. B. Cross,
V. Bakken, C. Adamo, J. Jaramillo, R. Gomperts, R. E. Stratmann,
O. Yazyev, A. J. Austin, R. Cammi, C. Pomelli, J. W. Ochterski,
R. L. Martin, K. Morokuma, V. G. Zakrzewski, G. A. Voth,
P. Salvador, J. J. Dannenberg, S. Dapprich, A. D. Daniels,
O. Farkas, J. B. Foresman, J. V. Ortiz, J. Cioslowski,
and D. J. Fox, Gaussian, Inc., Wallingford CT, 2013.
******************************************
Gaussian 09: ES64L-G09RevE.01 30-Nov-2015
27-May-2023
******************************************
%nprocshared=32
Will use up to 32 processors via shared memory.
%chk=bodipy-ex-parallel-negative.chk
%mem=32GB
----------------------------------------------------------------------
#p opt freq b3lyp/6-311g(d,p) empiricaldispersion=gd3bj scrf=(solvent=
water,pcm) nosymm field=x-20
----------------------------------------------------------------------
1/14=-1,18=20,19=15,26=3,38=1/1,3;
2/9=110,12=2,15=1,17=6,18=5,40=1/2;
3/5=4,6=6,7=101,11=2,14=1,15=-20,16=1,25=1,30=1,70=2201,71=1,72=1,74=-5,124=41/1,2,3;
4//1;
5/5=2,38=5,53=1/2;
6/7=2,8=2,9=2,10=2,28=1/1;
7/30=1/1,2,3,16;
1/14=-1,18=20,19=15,26=3/3(2);
2/9=110,15=1/2;
99//99;
2/9=110,15=1/2;
3/5=4,6=6,7=101,11=2,14=1,15=-20,16=1,25=1,30=1,70=2205,71=1,72=1,74=-5,124=41/1,2,3;
4/5=5,16=3,69=1/1;
5/5=2,38=5,53=1/2;
7/30=1/1,2,3,16;
1/14=-1,18=20,19=15,26=3/3(-5);
2/9=110,15=1/2;
6/7=2,8=2,9=2,10=2,19=2,28=1/1;
99/9=1/99;
Leave Link 1 at Sat May 27 23:53:42 2023, MaxMem= 4294967296 cpu: 2.2
(Enter /public/apps/gs/g09/l101.exe)
-
T
-
Symbolic Z-matrix:
Charge = 0 Multiplicity = 1
C -1.79458 1.23166 -1.1179
C -2.68356 0.65063 -0.21938
C -2.36693 -0.64112 0.43959
C -1.14209 -0.81514 1.06229
C -2.19713 2.3273 -1.92463
C -3.42152 2.91202 -1.7617
C -4.30035 2.46285 -0.74263
C -3.92092 1.33227 0.04733
C -3.2648 -1.75977 0.37654
C -2.93541 -2.96782 1.0724
C -1.70534 -3.0522 1.77432
C -3.8251 -4.07181 1.01908
C -5.53008 3.11912 -0.48371
C -6.35125 2.70678 0.53776
B 0.42074 0.43826 -0.27442
O -0.53468 0.78289 -1.32779
O -0.20234 0.16687 1.02208
C -0.81891 -2.00957 1.74688
C -4.44935 -1.75336 -0.40909
C -5.28034 -2.84713 -0.45752
C -4.97927 -4.01572 0.27756
C -5.96122 1.61885 1.3498
C -4.7836 0.95058 1.11006
H -1.49127 2.68827 -2.66291
H -3.71883 3.74802 -2.38485
H -1.46402 -3.96714 2.30361
H -3.56468 -4.97099 1.56686
H -5.804 3.96611 -1.10352
H -7.2861 3.21928 0.7315
H 0.14447 -2.0685 2.23831
H -4.69297 -0.87356 -0.98721
H -6.17298 -2.81532 -1.07159
H -5.64859 -4.86695 0.23857
H -6.59418 1.31096 2.17416
H -4.4987 0.12509 1.74788
C 5.76486 0.27401 -0.88329
C 7.12889 0.08626 -0.67629
C 3.39187 0.13128 -0.09913
N 1.24623 -0.77822 -0.81631
C 4.37416 -2.86142 -1.04564
N 1.43909 1.5818 0.02937
C -0.58829 -2.17003 -1.90102
C 4.83344 2.88865 0.98672
C 7.58722 -0.4362 0.53192
C 6.67706 -0.77249 1.53263
C 5.3124 -0.5888 1.32536
C 4.85201 -0.0637 0.11677
C -0.21223 3.41628 0.5405
C 2.8211 1.37553 0.17561
C 2.626 -0.93053 -0.58139
C 3.02143 -2.22024 -1.05457
C 1.87682 -2.79871 -1.58253
C 0.80154 -1.90037 -1.43376
C 1.15459 2.83395 0.455
C 2.34833 3.47352 0.83682
C 3.40139 2.58171 0.67601
H 5.40415 0.6802 -1.82084
H 7.83243 0.34841 -1.45751
H 5.09794 -2.28958 -1.63012
H 4.77933 -2.93982 -0.03515
H 4.30647 -3.8644 -1.46953
H -0.54937 -2.8811 -2.72779
H -1.18743 -2.62187 -1.10751
H -1.09107 -1.26328 -2.2242
H 4.90837 3.88811 1.41772
H 5.2599 2.17417 1.69315
H 5.4571 2.85474 0.09085
H 8.64893 -0.58046 0.69299
H 7.02833 -1.17879 2.47368
H 4.60048 -0.85095 2.09893
H -0.59106 3.69805 -0.44414
H -0.91866 2.70494 0.96907
H -0.18598 4.31243 1.16064
H 1.80611 -3.76973 -2.04937
H 2.41615 4.48658 1.20394
NAtoms= 75 NQM= 75 NQMF= 0 NMMI= 0 NMMIF= 0
NMic= 0 NMicF= 0.
Isotopes and Nuclear Properties:
(Nuclear quadrupole moments (NQMom) in fm**2, nuclear magnetic moments (NMagM)
in nuclear magnetons)
Atom 1 2 3 4 5 6 7 8 9 10
IAtWgt= 12 12 12 12 12 12 12 12 12 12
AtmWgt= 12.0000000 12.0000000 12.0000000 12.0000000 12.0000000 12.0000000 12.0000000 12.0000000 12.0000000 12.0000000
NucSpn= 0 0 0 0 0 0 0 0 0 0
AtZEff= 0.0000000 0.0000000 0.0000000 0.0000000 0.0000000 0.0000000 0.0000000 0.0000000 0.0000000 0.0000000
NQMom= 0.0000000 0.0000000 0.0000000 0.0000000 0.0000000 0.0000000 0.0000000 0.0000000 0.0000000 0.0000000
NMagM= 0.0000000 0.0000000 0.0000000 0.0000000 0.0000000 0.0000000 0.0000000 0.0000000 0.0000000 0.0000000
AtZNuc= 6.0000000 6.0000000 6.0000000 6.0000000 6.0000000 6.0000000 6.0000000 6.0000000 6.0000000 6.0000000
Atom 11 12 13 14 15 16 17 18 19 20
IAtWgt= 12 12 12 12 11 16 16 12 12 12
AtmWgt= 12.0000000 12.0000000 12.0000000 12.0000000 11.0093053 15.9949146 15.9949146 12.0000000 12.0000000 12.0000000
NucSpn= 0 0 0 0 3 0 0 0 0 0
AtZEff= 0.0000000 0.0000000 0.0000000 0.0000000 0.0000000 0.0000000 0.0000000 0.0000000 0.0000000 0.0000000
NQMom= 0.0000000 0.0000000 0.0000000 0.0000000 4.0590000 0.0000000 0.0000000 0.0000000 0.0000000 0.0000000
NMagM= 0.0000000 0.0000000 0.0000000 0.0000000 2.6886370 0.0000000 0.0000000 0.0000000 0.0000000 0.0000000
AtZNuc= 6.0000000 6.0000000 6.0000000 6.0000000 5.0000000 8.0000000 8.0000000 6.0000000 6.0000000 6.0000000
Atom 21 22 23 24 25 26 27 28 29 30
IAtWgt= 12 12 12 1 1 1 1 1 1 1
AtmWgt= 12.0000000 12.0000000 12.0000000 1.0078250 1.0078250 1.0078250 1.0078250 1.0078250 1.0078250 1.0078250
NucSpn= 0 0 0 1 1 1 1 1 1 1
AtZEff= 0.0000000 0.0000000 0.0000000 0.0000000 0.0000000 0.0000000 0.0000000 0.0000000 0.0000000 0.0000000
NQMom= 0.0000000 0.0000000 0.0000000 0.0000000 0.0000000 0.0000000 0.0000000 0.0000000 0.0000000 0.0000000
NMagM= 0.0000000 0.0000000 0.0000000 2.7928460 2.7928460 2.7928460 2.7928460 2.7928460 2.7928460 2.7928460
AtZNuc= 6.0000000 6.0000000 6.0000000 1.0000000 1.0000000 1.0000000 1.0000000 1.0000000 1.0000000 1.0000000
Atom 31 32 33 34 35 36 37 38 39 40
IAtWgt= 1 1 1 1 1 12 12 12 14 12
AtmWgt= 1.0078250 1.0078250 1.0078250 1.0078250 1.0078250 12.0000000 12.0000000 12.0000000 14.0030740 12.0000000
NucSpn= 1 1 1 1 1 0 0 0 2 0
AtZEff= 0.0000000 0.0000000 0.0000000 0.0000000 0.0000000 0.0000000 0.0000000 0.0000000 0.0000000 0.0000000
NQMom= 0.0000000 0.0000000 0.0000000 0.0000000 0.0000000 0.0000000 0.0000000 0.0000000 2.0440000 0.0000000
NMagM= 2.7928460 2.7928460 2.7928460 2.7928460 2.7928460 0.0000000 0.0000000 0.0000000 0.4037610 0.0000000
AtZNuc= 1.0000000 1.0000000 1.0000000 1.0000000 1.0000000 6.0000000 6.0000000 6.0000000 7.0000000 6.0000000
Atom 41 42 43 44 45 46 47 48 49 50
IAtWgt= 14 12 12 12 12 12 12 12 12 12
AtmWgt= 14.0030740 12.0000000 12.0000000 12.0000000 12.0000000 12.0000000 12.0000000 12.0000000 12.0000000 12.0000000
NucSpn= 2 0 0 0 0 0 0 0 0 0
AtZEff= 0.0000000 0.0000000 0.0000000 0.0000000 0.0000000 0.0000000 0.0000000 0.0000000 0.0000000 0.0000000
NQMom= 2.0440000 0.0000000 0.0000000 0.0000000 0.0000000 0.0000000 0.0000000 0.0000000 0.0000000 0.0000000
NMagM= 0.4037610 0.0000000 0.0000000 0.0000000 0.0000000 0.0000000 0.0000000 0.0000000 0.0000000 0.0000000
AtZNuc= 7.0000000 6.0000000 6.0000000 6.0000000 6.0000000 6.0000000 6.0000000 6.0000000 6.0000000 6.0000000
Atom 51 52 53 54 55 56 57 58 59 60
IAtWgt= 12 12 12 12 12 12 1 1 1 1
AtmWgt= 12.0000000 12.0000000 12.0000000 12.0000000 12.0000000 12.0000000 1.0078250 1.0078250 1.0078250 1.0078250
NucSpn= 0 0 0 0 0 0 1 1 1 1
AtZEff= 0.0000000 0.0000000 0.0000000 0.0000000 0.0000000 0.0000000 0.0000000 0.0000000 0.0000000 0.0000000
NQMom= 0.0000000 0.0000000 0.0000000 0.0000000 0.0000000 0.0000000 0.0000000 0.0000000 0.0000000 0.0000000
NMagM= 0.0000000 0.0000000 0.0000000 0.0000000 0.0000000 0.0000000 2.7928460 2.7928460 2.7928460 2.7928460
AtZNuc= 6.0000000 6.0000000 6.0000000 6.0000000 6.0000000 6.0000000 1.0000000 1.0000000 1.0000000 1.0000000
Atom 61 62 63 64 65 66 67 68 69 70
IAtWgt= 1 1 1 1 1 1 1 1 1 1
AtmWgt= 1.0078250 1.0078250 1.0078250 1.0078250 1.0078250 1.0078250 1.0078250 1.0078250 1.0078250 1.0078250
NucSpn= 1 1 1 1 1 1 1 1 1 1
AtZEff= 0.0000000 0.0000000 0.0000000 0.0000000 0.0000000 0.0000000 0.0000000 0.0000000 0.0000000 0.0000000
NQMom= 0.0000000 0.0000000 0.0000000 0.0000000 0.0000000 0.0000000 0.0000000 0.0000000 0.0000000 0.0000000
NMagM= 2.7928460 2.7928460 2.7928460 2.7928460 2.7928460 2.7928460 2.7928460 2.7928460 2.7928460 2.7928460
AtZNuc= 1.0000000 1.0000000 1.0000000 1.0000000 1.0000000 1.0000000 1.0000000 1.0000000 1.0000000 1.0000000
Atom 71 72 73 74 75
IAtWgt= 1 1 1 1 1
AtmWgt= 1.0078250 1.0078250 1.0078250 1.0078250 1.0078250
NucSpn= 1 1 1 1 1
AtZEff= 0.0000000 0.0000000 0.0000000 0.0000000 0.0000000
NQMom= 0.0000000 0.0000000 0.0000000 0.0000000 0.0000000
NMagM= 2.7928460 2.7928460 2.7928460 2.7928460 2.7928460
AtZNuc= 1.0000000 1.0000000 1.0000000 1.0000000 1.0000000
Leave Link 101 at Sat May 27 23:53:43 2023, MaxMem= 4294967296 cpu: 14.7
(Enter /public/apps/gs/g09/l103.exe)
GradGradGradGradGradGradGradGradGradGradGradGradGradGradGradGradGradGrad
Berny optimization.
Initialization pass.
----------------------------
! Initial Parameters !
! (Angstroms and Degrees) !
-------------------------- --------------------------
! Name Definition Value Derivative Info. !
--------------------------------------------------------------------------------
! R1 R(1,2) 1.3911 estimate D2E/DX2 !
! R2 R(1,5) 1.4189 estimate D2E/DX2 !
! R3 R(1,16) 1.3538 estimate D2E/DX2 !
! R4 R(2,3) 1.4843 estimate D2E/DX2 !
! R5 R(2,8) 1.4376 estimate D2E/DX2 !
! R6 R(3,4) 1.385 estimate D2E/DX2 !
! R7 R(3,9) 1.4358 estimate D2E/DX2 !
! R8 R(4,17) 1.3598 estimate D2E/DX2 !
! R9 R(4,18) 1.4141 estimate D2E/DX2 !
! R10 R(5,6) 1.3666 estimate D2E/DX2 !
! R11 R(5,24) 1.0833 estimate D2E/DX2 !
! R12 R(6,7) 1.4187 estimate D2E/DX2 !
! R13 R(6,25) 1.0842 estimate D2E/DX2 !
! R14 R(7,8) 1.4305 estimate D2E/DX2 !
! R15 R(7,13) 1.4177 estimate D2E/DX2 !
! R16 R(8,23) 1.421 estimate D2E/DX2 !
! R17 R(9,10) 1.4325 estimate D2E/DX2 !
! R18 R(9,19) 1.4214 estimate D2E/DX2 !
! R19 R(10,11) 1.4188 estimate D2E/DX2 !
! R20 R(10,12) 1.4189 estimate D2E/DX2 !
! R21 R(11,18) 1.3688 estimate D2E/DX2 !
! R22 R(11,26) 1.0842 estimate D2E/DX2 !
! R23 R(12,21) 1.373 estimate D2E/DX2 !
! R24 R(12,27) 1.0846 estimate D2E/DX2 !
! R25 R(13,14) 1.374 estimate D2E/DX2 !
! R26 R(13,28) 1.0847 estimate D2E/DX2 !
! R27 R(14,22) 1.4125 estimate D2E/DX2 !
! R28 R(14,29) 1.0836 estimate D2E/DX2 !
! R29 R(15,16) 1.4633 estimate D2E/DX2 !
! R30 R(15,17) 1.4638 estimate D2E/DX2 !
! R31 R(15,39) 1.5668 estimate D2E/DX2 !
! R32 R(15,41) 1.5611 estimate D2E/DX2 !
! R33 R(18,30) 1.0831 estimate D2E/DX2 !
! R34 R(19,20) 1.3745 estimate D2E/DX2 !
! R35 R(19,31) 1.0806 estimate D2E/DX2 !
! R36 R(20,21) 1.413 estimate D2E/DX2 !
! R37 R(20,32) 1.0839 estimate D2E/DX2 !
! R38 R(21,33) 1.0836 estimate D2E/DX2 !
! R39 R(22,23) 1.3751 estimate D2E/DX2 !
! R40 R(22,34) 1.084 estimate D2E/DX2 !
! R41 R(23,35) 1.0814 estimate D2E/DX2 !
! R42 R(36,37) 1.3924 estimate D2E/DX2 !
! R43 R(36,47) 1.3955 estimate D2E/DX2 !
! R44 R(36,57) 1.0836 estimate D2E/DX2 !
! R45 R(37,44) 1.3938 estimate D2E/DX2 !
! R46 R(37,58) 1.0835 estimate D2E/DX2 !
! R47 R(38,47) 1.4888 estimate D2E/DX2 !
! R48 R(38,49) 1.3962 estimate D2E/DX2 !
! R49 R(38,50) 1.3952 estimate D2E/DX2 !
! R50 R(39,50) 1.4079 estimate D2E/DX2 !
! R51 R(39,53) 1.3558 estimate D2E/DX2 !
! R52 R(40,51) 1.497 estimate D2E/DX2 !
! R53 R(40,59) 1.092 estimate D2E/DX2 !
! R54 R(40,60) 1.0915 estimate D2E/DX2 !
! R55 R(40,61) 1.091 estimate D2E/DX2 !
! R56 R(41,49) 1.405 estimate D2E/DX2 !
! R57 R(41,54) 1.3528 estimate D2E/DX2 !
! R58 R(42,53) 1.4909 estimate D2E/DX2 !
! R59 R(42,62) 1.0912 estimate D2E/DX2 !
! R60 R(42,63) 1.0921 estimate D2E/DX2 !
! R61 R(42,64) 1.086 estimate D2E/DX2 !
! R62 R(43,56) 1.4972 estimate D2E/DX2 !
! R63 R(43,65) 1.091 estimate D2E/DX2 !
! R64 R(43,66) 1.0915 estimate D2E/DX2 !
! R65 R(43,67) 1.0921 estimate D2E/DX2 !
! R66 R(44,45) 1.3939 estimate D2E/DX2 !
! R67 R(44,68) 1.0835 estimate D2E/DX2 !
! R68 R(45,46) 1.3925 estimate D2E/DX2 !
! R69 R(45,69) 1.0835 estimate D2E/DX2 !
! R70 R(46,47) 1.3958 estimate D2E/DX2 !
! R71 R(46,70) 1.0835 estimate D2E/DX2 !
! R72 R(48,54) 1.4882 estimate D2E/DX2 !
! R73 R(48,71) 1.092 estimate D2E/DX2 !
! R74 R(48,72) 1.0903 estimate D2E/DX2 !
! R75 R(48,73) 1.0901 estimate D2E/DX2 !
! R76 R(49,56) 1.429 estimate D2E/DX2 !
! R77 R(50,51) 1.4296 estimate D2E/DX2 !
! R78 R(51,52) 1.3869 estimate D2E/DX2 !
! R79 R(52,53) 1.409 estimate D2E/DX2 !
! R80 R(52,74) 1.0797 estimate D2E/DX2 !
! R81 R(54,55) 1.4071 estimate D2E/DX2 !
! R82 R(55,56) 1.3893 estimate D2E/DX2 !
! R83 R(55,75) 1.0797 estimate D2E/DX2 !
! A1 A(2,1,5) 120.5599 estimate D2E/DX2 !
! A2 A(2,1,16) 123.807 estimate D2E/DX2 !
! A3 A(5,1,16) 115.585 estimate D2E/DX2 !
! A4 A(1,2,3) 120.9255 estimate D2E/DX2 !
! A5 A(1,2,8) 118.1516 estimate D2E/DX2 !
! A6 A(3,2,8) 120.9219 estimate D2E/DX2 !
! A7 A(2,3,4) 119.8416 estimate D2E/DX2 !
! A8 A(2,3,9) 121.6783 estimate D2E/DX2 !
! A9 A(4,3,9) 118.3513 estimate D2E/DX2 !
! A10 A(3,4,17) 120.4729 estimate D2E/DX2 !
! A11 A(3,4,18) 121.7277 estimate D2E/DX2 !
! A12 A(17,4,18) 117.7974 estimate D2E/DX2 !
! A13 A(1,5,6) 121.1175 estimate D2E/DX2 !
! A14 A(1,5,24) 117.3804 estimate D2E/DX2 !
! A15 A(6,5,24) 121.497 estimate D2E/DX2 !
! A16 A(5,6,7) 120.3437 estimate D2E/DX2 !
! A17 A(5,6,25) 120.4682 estimate D2E/DX2 !
! A18 A(7,6,25) 119.1503 estimate D2E/DX2 !
! A19 A(6,7,8) 118.8564 estimate D2E/DX2 !
! A20 A(6,7,13) 121.4639 estimate D2E/DX2 !
! A21 A(8,7,13) 119.6749 estimate D2E/DX2 !
! A22 A(2,8,7) 120.0388 estimate D2E/DX2 !
! A23 A(2,8,23) 122.2693 estimate D2E/DX2 !
! A24 A(7,8,23) 117.6624 estimate D2E/DX2 !
! A25 A(3,9,10) 119.4658 estimate D2E/DX2 !
! A26 A(3,9,19) 122.813 estimate D2E/DX2 !
! A27 A(10,9,19) 117.6397 estimate D2E/DX2 !
! A28 A(9,10,11) 119.3299 estimate D2E/DX2 !
! A29 A(9,10,12) 119.5855 estimate D2E/DX2 !
! A30 A(11,10,12) 121.062 estimate D2E/DX2 !
! A31 A(10,11,18) 120.4145 estimate D2E/DX2 !
! A32 A(10,11,26) 118.9923 estimate D2E/DX2 !
! A33 A(18,11,26) 120.5599 estimate D2E/DX2 !
! A34 A(10,12,21) 121.0386 estimate D2E/DX2 !
! A35 A(10,12,27) 118.3928 estimate D2E/DX2 !
! A36 A(21,12,27) 120.5616 estimate D2E/DX2 !
! A37 A(7,13,14) 121.0158 estimate D2E/DX2 !
! A38 A(7,13,28) 118.4332 estimate D2E/DX2 !
! A39 A(14,13,28) 120.5459 estimate D2E/DX2 !
! A40 A(13,14,22) 119.5727 estimate D2E/DX2 !
! A41 A(13,14,29) 120.4388 estimate D2E/DX2 !
! A42 A(22,14,29) 119.9826 estimate D2E/DX2 !
! A43 A(16,15,17) 113.7867 estimate D2E/DX2 !
! A44 A(16,15,39) 106.1338 estimate D2E/DX2 !
! A45 A(16,15,41) 113.1719 estimate D2E/DX2 !
! A46 A(17,15,39) 112.7456 estimate D2E/DX2 !
! A47 A(17,15,41) 103.9525 estimate D2E/DX2 !
! A48 A(39,15,41) 106.9987 estimate D2E/DX2 !
! A49 A(1,16,15) 125.0366 estimate D2E/DX2 !
! A50 A(4,17,15) 117.0157 estimate D2E/DX2 !
! A51 A(4,18,11) 120.3366 estimate D2E/DX2 !
! A52 A(4,18,30) 117.962 estimate D2E/DX2 !
! A53 A(11,18,30) 121.7009 estimate D2E/DX2 !
! A54 A(9,19,20) 121.3133 estimate D2E/DX2 !
! A55 A(9,19,31) 119.161 estimate D2E/DX2 !
! A56 A(20,19,31) 119.5222 estimate D2E/DX2 !
! A57 A(19,20,21) 120.7285 estimate D2E/DX2 !
! A58 A(19,20,32) 119.6363 estimate D2E/DX2 !
! A59 A(21,20,32) 119.6339 estimate D2E/DX2 !
! A60 A(12,21,20) 119.5946 estimate D2E/DX2 !
! A61 A(12,21,33) 120.4373 estimate D2E/DX2 !
! A62 A(20,21,33) 119.9581 estimate D2E/DX2 !
! A63 A(14,22,23) 120.7014 estimate D2E/DX2 !
! A64 A(14,22,34) 119.6529 estimate D2E/DX2 !
! A65 A(23,22,34) 119.6449 estimate D2E/DX2 !
! A66 A(8,23,22) 121.3162 estimate D2E/DX2 !
! A67 A(8,23,35) 119.0909 estimate D2E/DX2 !
! A68 A(22,23,35) 119.5888 estimate D2E/DX2 !
! A69 A(37,36,47) 120.1093 estimate D2E/DX2 !
! A70 A(37,36,57) 120.3515 estimate D2E/DX2 !
! A71 A(47,36,57) 119.539 estimate D2E/DX2 !
! A72 A(36,37,44) 120.1021 estimate D2E/DX2 !
! A73 A(36,37,58) 119.7546 estimate D2E/DX2 !
! A74 A(44,37,58) 120.1433 estimate D2E/DX2 !
! A75 A(47,38,49) 119.2809 estimate D2E/DX2 !
! A76 A(47,38,50) 119.2625 estimate D2E/DX2 !
! A77 A(49,38,50) 121.4548 estimate D2E/DX2 !
! A78 A(15,39,50) 122.862 estimate D2E/DX2 !
! A79 A(15,39,53) 128.8516 estimate D2E/DX2 !
! A80 A(50,39,53) 107.932 estimate D2E/DX2 !
! A81 A(51,40,59) 111.8038 estimate D2E/DX2 !
! A82 A(51,40,60) 111.821 estimate D2E/DX2 !
! A83 A(51,40,61) 109.5951 estimate D2E/DX2 !
! A84 A(59,40,60) 106.684 estimate D2E/DX2 !
! A85 A(59,40,61) 108.3356 estimate D2E/DX2 !
! A86 A(60,40,61) 108.4638 estimate D2E/DX2 !
! A87 A(15,41,49) 123.6687 estimate D2E/DX2 !
! A88 A(15,41,54) 127.0189 estimate D2E/DX2 !
! A89 A(49,41,54) 108.0606 estimate D2E/DX2 !
! A90 A(53,42,62) 108.789 estimate D2E/DX2 !
! A91 A(53,42,63) 111.0098 estimate D2E/DX2 !
! A92 A(53,42,64) 111.9524 estimate D2E/DX2 !
! A93 A(62,42,63) 107.4854 estimate D2E/DX2 !
! A94 A(62,42,64) 109.58 estimate D2E/DX2 !
! A95 A(63,42,64) 107.9187 estimate D2E/DX2 !
! A96 A(56,43,65) 109.602 estimate D2E/DX2 !
! A97 A(56,43,66) 111.9521 estimate D2E/DX2 !
! A98 A(56,43,67) 111.6926 estimate D2E/DX2 !
! A99 A(65,43,66) 108.4901 estimate D2E/DX2 !
! A100 A(65,43,67) 108.2576 estimate D2E/DX2 !
! A101 A(66,43,67) 106.7062 estimate D2E/DX2 !
! A102 A(37,44,45) 119.8703 estimate D2E/DX2 !
! A103 A(37,44,68) 120.064 estimate D2E/DX2 !
! A104 A(45,44,68) 120.0657 estimate D2E/DX2 !
! A105 A(44,45,46) 120.0816 estimate D2E/DX2 !
! A106 A(44,45,69) 120.1524 estimate D2E/DX2 !
! A107 A(46,45,69) 119.766 estimate D2E/DX2 !
! A108 A(45,46,47) 120.1159 estimate D2E/DX2 !
! A109 A(45,46,70) 120.3803 estimate D2E/DX2 !
! A110 A(47,46,70) 119.5038 estimate D2E/DX2 !
! A111 A(36,47,38) 120.392 estimate D2E/DX2 !
! A112 A(36,47,46) 119.7204 estimate D2E/DX2 !
! A113 A(38,47,46) 119.8875 estimate D2E/DX2 !
! A114 A(54,48,71) 111.5801 estimate D2E/DX2 !
! A115 A(54,48,72) 111.2465 estimate D2E/DX2 !
! A116 A(54,48,73) 109.405 estimate D2E/DX2 !
! A117 A(71,48,72) 107.3386 estimate D2E/DX2 !
! A118 A(71,48,73) 108.0101 estimate D2E/DX2 !
! A119 A(72,48,73) 109.168 estimate D2E/DX2 !
! A120 A(38,49,41) 120.8291 estimate D2E/DX2 !
! A121 A(38,49,56) 130.9278 estimate D2E/DX2 !
! A122 A(41,49,56) 108.1785 estimate D2E/DX2 !
! A123 A(38,50,39) 120.8852 estimate D2E/DX2 !
! A124 A(38,50,51) 130.4788 estimate D2E/DX2 !
! A125 A(39,50,51) 108.2676 estimate D2E/DX2 !
! A126 A(40,51,50) 129.3744 estimate D2E/DX2 !
! A127 A(40,51,52) 124.7072 estimate D2E/DX2 !
! A128 A(50,51,52) 105.9025 estimate D2E/DX2 !
! A129 A(51,52,53) 108.8869 estimate D2E/DX2 !
! A130 A(51,52,74) 126.4225 estimate D2E/DX2 !
! A131 A(53,52,74) 124.6835 estimate D2E/DX2 !
! A132 A(39,53,42) 126.7405 estimate D2E/DX2 !
! A133 A(39,53,52) 108.9943 estimate D2E/DX2 !
! A134 A(42,53,52) 124.264 estimate D2E/DX2 !
! A135 A(41,54,48) 124.9904 estimate D2E/DX2 !
! A136 A(41,54,55) 109.1284 estimate D2E/DX2 !
! A137 A(48,54,55) 125.8567 estimate D2E/DX2 !
! A138 A(54,55,56) 108.6555 estimate D2E/DX2 !
! A139 A(54,55,75) 124.8942 estimate D2E/DX2 !
! A140 A(56,55,75) 126.4461 estimate D2E/DX2 !
! A141 A(43,56,49) 129.3564 estimate D2E/DX2 !
! A142 A(43,56,55) 124.7079 estimate D2E/DX2 !
! A143 A(49,56,55) 105.9356 estimate D2E/DX2 !
! D1 D(5,1,2,3) 168.4221 estimate D2E/DX2 !
! D2 D(5,1,2,8) -11.225 estimate D2E/DX2 !
! D3 D(16,1,2,3) -8.9424 estimate D2E/DX2 !
! D4 D(16,1,2,8) 171.4105 estimate D2E/DX2 !
! D5 D(2,1,5,6) 5.6613 estimate D2E/DX2 !
! D6 D(2,1,5,24) -175.1476 estimate D2E/DX2 !
! D7 D(16,1,5,6) -176.7665 estimate D2E/DX2 !
! D8 D(16,1,5,24) 2.4246 estimate D2E/DX2 !
! D9 D(2,1,16,15) -46.8244 estimate D2E/DX2 !
! D10 D(5,1,16,15) 135.6916 estimate D2E/DX2 !
! D11 D(1,2,3,4) 50.0299 estimate D2E/DX2 !
! D12 D(1,2,3,9) -125.775 estimate D2E/DX2 !
! D13 D(8,2,3,4) -130.3328 estimate D2E/DX2 !
! D14 D(8,2,3,9) 53.8623 estimate D2E/DX2 !
! D15 D(1,2,8,7) 9.1935 estimate D2E/DX2 !
! D16 D(1,2,8,23) -168.7844 estimate D2E/DX2 !
! D17 D(3,2,8,7) -170.4536 estimate D2E/DX2 !
! D18 D(3,2,8,23) 11.5685 estimate D2E/DX2 !
! D19 D(2,3,4,17) -3.0314 estimate D2E/DX2 !
! D20 D(2,3,4,18) 177.4888 estimate D2E/DX2 !
! D21 D(9,3,4,17) 172.9121 estimate D2E/DX2 !
! D22 D(9,3,4,18) -6.5676 estimate D2E/DX2 !
! D23 D(2,3,9,10) -177.6373 estimate D2E/DX2 !
! D24 D(2,3,9,19) 5.7244 estimate D2E/DX2 !
! D25 D(4,3,9,10) 6.4974 estimate D2E/DX2 !
! D26 D(4,3,9,19) -170.1409 estimate D2E/DX2 !
! D27 D(3,4,17,15) -68.9789 estimate D2E/DX2 !
! D28 D(18,4,17,15) 110.5209 estimate D2E/DX2 !
! D29 D(3,4,18,11) 2.1014 estimate D2E/DX2 !
! D30 D(3,4,18,30) -178.1299 estimate D2E/DX2 !
! D31 D(17,4,18,11) -177.3918 estimate D2E/DX2 !
! D32 D(17,4,18,30) 2.377 estimate D2E/DX2 !
! D33 D(1,5,6,7) 2.3311 estimate D2E/DX2 !
! D34 D(1,5,6,25) -179.926 estimate D2E/DX2 !
! D35 D(24,5,6,7) -176.8265 estimate D2E/DX2 !
! D36 D(24,5,6,25) 0.9164 estimate D2E/DX2 !
! D37 D(5,6,7,8) -4.2288 estimate D2E/DX2 !
! D38 D(5,6,7,13) 174.9649 estimate D2E/DX2 !
! D39 D(25,6,7,8) 177.9988 estimate D2E/DX2 !
! D40 D(25,6,7,13) -2.8075 estimate D2E/DX2 !
! D41 D(6,7,8,2) -1.5712 estimate D2E/DX2 !
! D42 D(6,7,8,23) 176.4984 estimate D2E/DX2 !
! D43 D(13,7,8,2) 179.2204 estimate D2E/DX2 !
! D44 D(13,7,8,23) -2.71 estimate D2E/DX2 !
! D45 D(6,7,13,14) -177.5673 estimate D2E/DX2 !
! D46 D(6,7,13,28) 1.617 estimate D2E/DX2 !
! D47 D(8,7,13,14) 1.6199 estimate D2E/DX2 !
! D48 D(8,7,13,28) -179.1958 estimate D2E/DX2 !
! D49 D(2,8,23,22) 179.8232 estimate D2E/DX2 !
! D50 D(2,8,23,35) 0.5656 estimate D2E/DX2 !
! D51 D(7,8,23,22) 1.7996 estimate D2E/DX2 !
! D52 D(7,8,23,35) -177.458 estimate D2E/DX2 !
! D53 D(3,9,10,11) -2.1265 estimate D2E/DX2 !
! D54 D(3,9,10,12) 179.5847 estimate D2E/DX2 !
! D55 D(19,9,10,11) 174.6844 estimate D2E/DX2 !
! D56 D(19,9,10,12) -3.6043 estimate D2E/DX2 !
! D57 D(3,9,19,20) 179.3265 estimate D2E/DX2 !
! D58 D(3,9,19,31) 0.0111 estimate D2E/DX2 !
! D59 D(10,9,19,20) 2.6303 estimate D2E/DX2 !
! D60 D(10,9,19,31) -176.6851 estimate D2E/DX2 !
! D61 D(9,10,11,18) -2.4176 estimate D2E/DX2 !
! D62 D(9,10,11,26) 179.6678 estimate D2E/DX2 !
! D63 D(12,10,11,18) 175.8451 estimate D2E/DX2 !
! D64 D(12,10,11,26) -2.0695 estimate D2E/DX2 !
! D65 D(9,10,12,21) 1.9819 estimate D2E/DX2 !
! D66 D(9,10,12,27) -178.9737 estimate D2E/DX2 !
! D67 D(11,10,12,21) -176.2765 estimate D2E/DX2 !
! D68 D(11,10,12,27) 2.7679 estimate D2E/DX2 !
! D69 D(10,11,18,4) 2.525 estimate D2E/DX2 !
! D70 D(10,11,18,30) -177.235 estimate D2E/DX2 !
! D71 D(26,11,18,4) -179.5933 estimate D2E/DX2 !
! D72 D(26,11,18,30) 0.6467 estimate D2E/DX2 !
! D73 D(10,12,21,20) 0.7513 estimate D2E/DX2 !
! D74 D(10,12,21,33) 179.5997 estimate D2E/DX2 !
! D75 D(27,12,21,20) -178.2724 estimate D2E/DX2 !
! D76 D(27,12,21,33) 0.576 estimate D2E/DX2 !
! D77 D(7,13,14,22) 0.4802 estimate D2E/DX2 !
! D78 D(7,13,14,29) 179.5975 estimate D2E/DX2 !
! D79 D(28,13,14,22) -178.6869 estimate D2E/DX2 !
! D80 D(28,13,14,29) 0.4304 estimate D2E/DX2 !
! D81 D(13,14,22,23) -1.4419 estimate D2E/DX2 !
! D82 D(13,14,22,34) 178.212 estimate D2E/DX2 !
! D83 D(29,14,22,23) 179.4367 estimate D2E/DX2 !
! D84 D(29,14,22,34) -0.9094 estimate D2E/DX2 !
! D85 D(17,15,16,1) 20.1144 estimate D2E/DX2 !
! D86 D(39,15,16,1) 144.6809 estimate D2E/DX2 !
! D87 D(41,15,16,1) -98.2633 estimate D2E/DX2 !
! D88 D(16,15,17,4) 57.0773 estimate D2E/DX2 !
! D89 D(39,15,17,4) -63.8586 estimate D2E/DX2 !
! D90 D(41,15,17,4) -179.377 estimate D2E/DX2 !
! D91 D(16,15,39,50) 141.8685 estimate D2E/DX2 !
! D92 D(16,15,39,53) -45.819 estimate D2E/DX2 !
! D93 D(17,15,39,50) -92.9231 estimate D2E/DX2 !
! D94 D(17,15,39,53) 79.3894 estimate D2E/DX2 !
! D95 D(41,15,39,50) 20.7527 estimate D2E/DX2 !
! D96 D(41,15,39,53) -166.9349 estimate D2E/DX2 !
! D97 D(16,15,41,49) -134.222 estimate D2E/DX2 !
! D98 D(16,15,41,54) 60.1155 estimate D2E/DX2 !
! D99 D(17,15,41,49) 101.8326 estimate D2E/DX2 !
! D100 D(17,15,41,54) -63.8299 estimate D2E/DX2 !
! D101 D(39,15,41,49) -17.6755 estimate D2E/DX2 !
! D102 D(39,15,41,54) 176.662 estimate D2E/DX2 !
! D103 D(9,19,20,21) 0.0468 estimate D2E/DX2 !
! D104 D(9,19,20,32) -179.5403 estimate D2E/DX2 !
! D105 D(31,19,20,21) 179.3598 estimate D2E/DX2 !
! D106 D(31,19,20,32) -0.2273 estimate D2E/DX2 !
! D107 D(19,20,21,12) -1.7959 estimate D2E/DX2 !
! D108 D(19,20,21,33) 179.3501 estimate D2E/DX2 !
! D109 D(32,20,21,12) 177.7912 estimate D2E/DX2 !
! D110 D(32,20,21,33) -1.0628 estimate D2E/DX2 !
! D111 D(14,22,23,8) 0.2626 estimate D2E/DX2 !
! D112 D(14,22,23,35) 179.5166 estimate D2E/DX2 !
! D113 D(34,22,23,8) -179.3914 estimate D2E/DX2 !
! D114 D(34,22,23,35) -0.1374 estimate D2E/DX2 !
! D115 D(47,36,37,44) -0.1753 estimate D2E/DX2 !
! D116 D(47,36,37,58) 179.8657 estimate D2E/DX2 !
! D117 D(57,36,37,44) 179.9783 estimate D2E/DX2 !
! D118 D(57,36,37,58) 0.0192 estimate D2E/DX2 !
! D119 D(37,36,47,38) -179.8485 estimate D2E/DX2 !
! D120 D(37,36,47,46) 0.0727 estimate D2E/DX2 !
! D121 D(57,36,47,38) -0.0008 estimate D2E/DX2 !
! D122 D(57,36,47,46) 179.9204 estimate D2E/DX2 !
! D123 D(36,37,44,45) 0.0926 estimate D2E/DX2 !
! D124 D(36,37,44,68) -179.8952 estimate D2E/DX2 !
! D125 D(58,37,44,45) -179.9485 estimate D2E/DX2 !
! D126 D(58,37,44,68) 0.0636 estimate D2E/DX2 !
! D127 D(49,38,47,36) -85.8327 estimate D2E/DX2 !
! D128 D(49,38,47,46) 94.2462 estimate D2E/DX2 !
! D129 D(50,38,47,36) 93.6757 estimate D2E/DX2 !
! D130 D(50,38,47,46) -86.2454 estimate D2E/DX2 !
! D131 D(47,38,49,41) -177.7017 estimate D2E/DX2 !
! D132 D(47,38,49,56) -0.9942 estimate D2E/DX2 !
! D133 D(50,38,49,41) 2.8011 estimate D2E/DX2 !
! D134 D(50,38,49,56) 179.5085 estimate D2E/DX2 !
! D135 D(47,38,50,39) -179.0754 estimate D2E/DX2 !
! D136 D(47,38,50,51) -6.9139 estimate D2E/DX2 !
! D137 D(49,38,50,39) 0.422 estimate D2E/DX2 !
! D138 D(49,38,50,51) 172.5835 estimate D2E/DX2 !
! D139 D(15,39,50,38) -13.9033 estimate D2E/DX2 !
! D140 D(15,39,50,51) 172.3684 estimate D2E/DX2 !
! D141 D(53,39,50,38) 172.383 estimate D2E/DX2 !
! D142 D(53,39,50,51) -1.3453 estimate D2E/DX2 !
! D143 D(15,39,53,42) 8.2737 estimate D2E/DX2 !
! D144 D(15,39,53,52) -172.1174 estimate D2E/DX2 !
! D145 D(50,39,53,42) -178.5089 estimate D2E/DX2 !
! D146 D(50,39,53,52) 1.1 estimate D2E/DX2 !
! D147 D(59,40,51,50) -61.0363 estimate D2E/DX2 !
! D148 D(59,40,51,52) 117.3097 estimate D2E/DX2 !
! D149 D(60,40,51,50) 58.5186 estimate D2E/DX2 !
! D150 D(60,40,51,52) -123.1354 estimate D2E/DX2 !
! D151 D(61,40,51,50) 178.8272 estimate D2E/DX2 !
! D152 D(61,40,51,52) -2.8268 estimate D2E/DX2 !
! D153 D(15,41,49,38) 7.5094 estimate D2E/DX2 !
! D154 D(15,41,49,56) -169.8728 estimate D2E/DX2 !
! D155 D(54,41,49,38) 175.5062 estimate D2E/DX2 !
! D156 D(54,41,49,56) -1.876 estimate D2E/DX2 !
! D157 D(15,41,54,48) -8.7084 estimate D2E/DX2 !
! D158 D(15,41,54,55) 169.5769 estimate D2E/DX2 !
! D159 D(49,41,54,48) -176.1887 estimate D2E/DX2 !
! D160 D(49,41,54,55) 2.0966 estimate D2E/DX2 !
! D161 D(62,42,53,39) 153.6856 estimate D2E/DX2 !
! D162 D(62,42,53,52) -25.8669 estimate D2E/DX2 !
! D163 D(63,42,53,39) -88.2384 estimate D2E/DX2 !
! D164 D(63,42,53,52) 92.2091 estimate D2E/DX2 !
! D165 D(64,42,53,39) 32.4348 estimate D2E/DX2 !
! D166 D(64,42,53,52) -147.1177 estimate D2E/DX2 !
! D167 D(65,43,56,49) -176.1175 estimate D2E/DX2 !
! D168 D(65,43,56,55) 3.7687 estimate D2E/DX2 !
! D169 D(66,43,56,49) -55.6862 estimate D2E/DX2 !
! D170 D(66,43,56,55) 124.1999 estimate D2E/DX2 !
! D171 D(67,43,56,49) 63.9105 estimate D2E/DX2 !
! D172 D(67,43,56,55) -116.2033 estimate D2E/DX2 !
! D173 D(37,44,45,46) 0.0925 estimate D2E/DX2 !
! D174 D(37,44,45,69) -179.988 estimate D2E/DX2 !
! D175 D(68,44,45,46) -179.9197 estimate D2E/DX2 !
! D176 D(68,44,45,69) -0.0001 estimate D2E/DX2 !
! D177 D(44,45,46,47) -0.1951 estimate D2E/DX2 !
! D178 D(44,45,46,70) 179.8413 estimate D2E/DX2 !
! D179 D(69,45,46,47) 179.8851 estimate D2E/DX2 !
! D180 D(69,45,46,70) -0.0786 estimate D2E/DX2 !
! D181 D(45,46,47,36) 0.1123 estimate D2E/DX2 !
! D182 D(45,46,47,38) -179.9661 estimate D2E/DX2 !
! D183 D(70,46,47,36) -179.9238 estimate D2E/DX2 !
! D184 D(70,46,47,38) -0.0021 estimate D2E/DX2 !
! D185 D(71,48,54,41) -76.1154 estimate D2E/DX2 !
! D186 D(71,48,54,55) 105.8836 estimate D2E/DX2 !
! D187 D(72,48,54,41) 43.7284 estimate D2E/DX2 !
! D188 D(72,48,54,55) -134.2726 estimate D2E/DX2 !
! D189 D(73,48,54,41) 164.4229 estimate D2E/DX2 !
! D190 D(73,48,54,55) -13.5781 estimate D2E/DX2 !
! D191 D(38,49,56,43) 3.793 estimate D2E/DX2 !
! D192 D(38,49,56,55) -176.1097 estimate D2E/DX2 !
! D193 D(41,49,56,43) -179.1825 estimate D2E/DX2 !
! D194 D(41,49,56,55) 0.9148 estimate D2E/DX2 !
! D195 D(38,50,51,40) 6.7224 estimate D2E/DX2 !
! D196 D(38,50,51,52) -171.8638 estimate D2E/DX2 !
! D197 D(39,50,51,40) 179.6425 estimate D2E/DX2 !
! D198 D(39,50,51,52) 1.0563 estimate D2E/DX2 !
! D199 D(40,51,52,53) -179.0627 estimate D2E/DX2 !
! D200 D(40,51,52,74) -0.0026 estimate D2E/DX2 !
! D201 D(50,51,52,53) -0.3921 estimate D2E/DX2 !
! D202 D(50,51,52,74) 178.668 estimate D2E/DX2 !
! D203 D(51,52,53,39) -0.4391 estimate D2E/DX2 !
! D204 D(51,52,53,42) 179.1817 estimate D2E/DX2 !
! D205 D(74,52,53,39) -179.5194 estimate D2E/DX2 !
! D206 D(74,52,53,42) 0.1014 estimate D2E/DX2 !
! D207 D(41,54,55,56) -1.5388 estimate D2E/DX2 !
! D208 D(41,54,55,75) 179.1659 estimate D2E/DX2 !
! D209 D(48,54,55,56) 176.7279 estimate D2E/DX2 !
! D210 D(48,54,55,75) -2.5674 estimate D2E/DX2 !
! D211 D(54,55,56,43) -179.5637 estimate D2E/DX2 !
! D212 D(54,55,56,49) 0.3448 estimate D2E/DX2 !
! D213 D(75,55,56,43) -0.2822 estimate D2E/DX2 !
! D214 D(75,55,56,49) 179.6263 estimate D2E/DX2 !
--------------------------------------------------------------------------------
Trust Radius=3.00D-01 FncErr=1.00D-07 GrdErr=1.00D-06
Number of steps in this run= 450 maximum allowed number of steps= 450.
GradGradGradGradGradGradGradGradGradGradGradGradGradGradGradGradGradGrad
Leave Link 103 at Sat May 27 23:53:43 2023, MaxMem= 4294967296 cpu: 0.5
(Enter /public/apps/gs/g09/l202.exe)
Symmetry turned off by external request.
Stoichiometry C39H31BN2O2
Framework group C1[X(C39H31BN2O2)]
Deg. of freedom 219
Full point group C1 NOp 1
Input orientation:
---------------------------------------------------------------------
Center Atomic Atomic Coordinates (Angstroms)
Number Number Type X Y Z
---------------------------------------------------------------------
1 6 0 -1.794577 1.231657 -1.117903
2 6 0 -2.683558 0.650632 -0.219380
3 6 0 -2.366929 -0.641117 0.439593
4 6 0 -1.142088 -0.815143 1.062286
5 6 0 -2.197133 2.327304 -1.924626
6 6 0 -3.421520 2.912023 -1.761704
7 6 0 -4.300348 2.462854 -0.742628
8 6 0 -3.920917 1.332268 0.047327
9 6 0 -3.264804 -1.759767 0.376538
10 6 0 -2.935411 -2.967821 1.072401
11 6 0 -1.705340 -3.052200 1.774319
12 6 0 -3.825103 -4.071809 1.019084
13 6 0 -5.530081 3.119117 -0.483705
14 6 0 -6.351252 2.706781 0.537764
15 5 0 0.420735 0.438257 -0.274417
16 8 0 -0.534679 0.782885 -1.327794
17 8 0 -0.202344 0.166867 1.022083
18 6 0 -0.818912 -2.009572 1.746881
19 6 0 -4.449354 -1.753356 -0.409085
20 6 0 -5.280335 -2.847133 -0.457522
21 6 0 -4.979265 -4.015721 0.277556
22 6 0 -5.961222 1.618846 1.349801
23 6 0 -4.783604 0.950578 1.110061
24 1 0 -1.491266 2.688266 -2.662913
25 1 0 -3.718828 3.748020 -2.384848
26 1 0 -1.464017 -3.967138 2.303613
27 1 0 -3.564680 -4.970993 1.566858
28 1 0 -5.804001 3.966106 -1.103521
29 1 0 -7.286102 3.219283 0.731499
30 1 0 0.144472 -2.068503 2.238312
31 1 0 -4.692968 -0.873562 -0.987206
32 1 0 -6.172979 -2.815324 -1.071591
33 1 0 -5.648586 -4.866954 0.238568
34 1 0 -6.594177 1.310957 2.174163
35 1 0 -4.498702 0.125090 1.747883
36 6 0 5.764864 0.274007 -0.883293
37 6 0 7.128890 0.086264 -0.676290
38 6 0 3.391867 0.131281 -0.099127
39 7 0 1.246226 -0.778219 -0.816314
40 6 0 4.374163 -2.861423 -1.045636
41 7 0 1.439087 1.581797 0.029374
42 6 0 -0.588288 -2.170027 -1.901016
43 6 0 4.833441 2.888648 0.986716
44 6 0 7.587217 -0.436202 0.531922
45 6 0 6.677056 -0.772493 1.532629
46 6 0 5.312400 -0.588802 1.325357
47 6 0 4.852007 -0.063700 0.116772
48 6 0 -0.212231 3.416279 0.540496
49 6 0 2.821100 1.375527 0.175607
50 6 0 2.625995 -0.930526 -0.581386
51 6 0 3.021433 -2.220238 -1.054573
52 6 0 1.876816 -2.798705 -1.582531
53 6 0 0.801543 -1.900371 -1.433755
54 6 0 1.154588 2.833952 0.455004
55 6 0 2.348333 3.473523 0.836823
56 6 0 3.401394 2.581710 0.676012
57 1 0 5.404153 0.680200 -1.820842
58 1 0 7.832426 0.348408 -1.457508
59 1 0 5.097944 -2.289581 -1.630122
60 1 0 4.779328 -2.939821 -0.035145
61 1 0 4.306468 -3.864403 -1.469532
62 1 0 -0.549368 -2.881102 -2.727788
63 1 0 -1.187427 -2.621869 -1.107510
64 1 0 -1.091070 -1.263275 -2.224199
65 1 0 4.908370 3.888111 1.417721
66 1 0 5.259903 2.174169 1.693146
67 1 0 5.457104 2.854738 0.090854
68 1 0 8.648929 -0.580458 0.692988
69 1 0 7.028329 -1.178790 2.473677
70 1 0 4.600485 -0.850949 2.098928
71 1 0 -0.591055 3.698052 -0.444140
72 1 0 -0.918663 2.704935 0.969067
73 1 0 -0.185977 4.312429 1.160635
74 1 0 1.806106 -3.769726 -2.049370
75 1 0 2.416154 4.486584 1.203944
---------------------------------------------------------------------
Rotational constants (GHZ): 0.1527392 0.0553806 0.0453053
Leave Link 202 at Sat May 27 23:53:43 2023, MaxMem= 4294967296 cpu: 0.2
(Enter /public/apps/gs/g09/l301.exe)
Standard basis: 6-311G(d,p) (5D, 7F)
Ernie: Thresh= 0.10000D-02 Tol= 0.10000D-05 Strict=F.
The following finite field(s) will be applied:
An electric field of -0.0020 0.0000 0.0000
978 basis functions, 1656 primitive gaussians, 1022 cartesian basis functions
150 alpha electrons 150 beta electrons
nuclear repulsion energy 5188.9767310978 Hartrees.
IExCor= 402 DFT=T Ex+Corr=B3LYP ExCW=0 ScaHFX= 0.200000
ScaDFX= 0.800000 0.720000 1.000000 0.810000 ScalE2= 1.000000 1.000000
IRadAn= 0 IRanWt= -1 IRanGd= 0 ICorTp=0 IEmpDi=141
NAtoms= 75 NActive= 75 NUniq= 75 SFac= 1.00D+00 NAtFMM= 60 NAOKFM=T Big=T
Integral buffers will be 131072 words long.
Raffenetti 2 integral format.
Two-electron integral symmetry is turned off.
R6Disp: Grimme-D3(BJ) Dispersion energy= -0.2146226560 Hartrees.
Nuclear repulsion after empirical dispersion term = 5188.7621084418 Hartrees.
------------------------------------------------------------------------------
Polarizable Continuum Model (PCM)
=================================
Model : PCM (using non-symmetric T matrix).
Atomic radii : UFF (Universal Force Field).
Polarization charges : Total charges.
Charge compensation : None.
Solution method : On-the-fly selection.
Cavity type : Scaled VdW (van der Waals Surface) (Alpha=1.100).
Cavity algorithm : GePol (No added spheres)
Default sphere list used, NSphG= 75.
Lebedev-Laikov grids with approx. 5.0 points / Ang**2.
Smoothing algorithm: York/Karplus (Gamma=1.0000).
Polarization charges: spherical gaussians, with
point-specific exponents (IZeta= 3).
Self-potential: point-specific (ISelfS= 7).
Self-field : sphere-specific E.n sum rule (ISelfD= 2).
1st derivatives : Analytical E(r).r(x)/FMM algorithm (CHGder, D1EAlg=3).
Cavity 1st derivative terms included.
Solvent : Water, Eps= 78.355300 Eps(inf)= 1.777849
------------------------------------------------------------------------------
GePol: Number of generator spheres = 75
GePol: Total number of spheres = 75
GePol: Number of exposed spheres = 75 (100.00%)
GePol: Number of points = 4849
GePol: Average weight of points = 0.13
GePol: Minimum weight of points = 0.22D-10
GePol: Maximum weight of points = 0.20577
GePol: Number of points with low weight = 387
GePol: Fraction of low-weight points (<1% of avg) = 7.98%
GePol: Cavity surface area = 614.933 Ang**2
GePol: Cavity volume = 758.357 Ang**3
Leave Link 301 at Sat May 27 23:53:43 2023, MaxMem= 4294967296 cpu: 2.7
(Enter /public/apps/gs/g09/l302.exe)
NPDir=0 NMtPBC= 1 NCelOv= 1 NCel= 1 NClECP= 1 NCelD= 1
NCelK= 1 NCelE2= 1 NClLst= 1 CellRange= 0.0.
One-electron integrals computed using PRISM.
NBasis= 978 RedAO= T EigKep= 7.67D-05 NBF= 978
NBsUse= 978 1.00D-06 EigRej= -1.00D+00 NBFU= 978
Precomputing XC quadrature grid using
IXCGrd= 4 IRadAn= 0 IRanWt= -1 IRanGd= 0 AccXCQ= 0.00D+00.
Generated NRdTot= 0 NPtTot= 0 NUsed= 0 NTot= 32
NSgBfM= 944 949 958 958 959 MxSgAt= 75 MxSgA2= 75.
Leave Link 302 at Sat May 27 23:53:45 2023, MaxMem= 4294967296 cpu: 65.7
(Enter /public/apps/gs/g09/l303.exe)
DipDrv: MaxL=1.
The nuclear repulsion energy is now 5188.7621084531 hartrees.
Leave Link 303 at Sat May 27 23:53:45 2023, MaxMem= 4294967296 cpu: 5.0
(Enter /public/apps/gs/g09/l401.exe)
ExpMin= 9.89D-02 ExpMax= 8.59D+03 ExpMxC= 1.30D+03 IAcc=2 IRadAn= 4 AccDes= 0.00D+00
Harris functional with IExCor= 402 and IRadAn= 4 diagonalized for initial guess.
HarFok: IExCor= 402 AccDes= 0.00D+00 IRadAn= 4 IDoV= 1 UseB2=F ITyADJ=14
ICtDFT= 3500011 ScaDFX= 1.000000 1.000000 1.000000 1.000000
FoFCou: FMM=F IPFlag= 0 FMFlag= 100000 FMFlg1= 2001
NFxFlg= 0 DoJE=T BraDBF=F KetDBF=T FulRan=T
wScrn= 0.000000 ICntrl= 500 IOpCl= 0 I1Cent= 200000004 NGrid= 0
NMat0= 1 NMatS0= 1 NMatT0= 0 NMatD0= 1 NMtDS0= 0 NMtDT0= 0
Symmetry not used in FoFCou.
Harris En= -1790.52767001409
JPrj=0 DoOrth=F DoCkMO=F.
Leave Link 401 at Sat May 27 23:53:48 2023, MaxMem= 4294967296 cpu: 96.9
(Enter /public/apps/gs/g09/l502.exe)
Closed shell SCF:
Using DIIS extrapolation, IDIIS= 1040.
Two-electron integral symmetry not used.
IVT= 3190988 IEndB= 3190988 NGot= 4294967296 MDV= 4292838455
LenX= 4292838455 LenY= 4291792949
Requested convergence on RMS density matrix=1.00D-08 within 128 cycles.
Requested convergence on MAX density matrix=1.00D-06.
Requested convergence on energy=1.00D-06.
No special actions if energy rises.
Fock matrices will be formed incrementally for 20 cycles.
Cycle 1 Pass 1 IDiag 1:
FoFJK: IHMeth= 1 ICntrl= 0 DoSepK=F KAlg= 0 I1Cent= 0 FoldK=F
IRaf= 680000000 NMat= 1 IRICut= 1 DoRegI=T DoRafI=F ISym2E= 0.
FoFCou: FMM=T IPFlag= 0 FMFlag= 100000 FMFlg1= 2001
NFxFlg= 0 DoJE=F BraDBF=F KetDBF=F FulRan=T
wScrn= 0.000000 ICntrl= 0 IOpCl= 0 I1Cent= 0 NGrid= 0
NMat0= 1 NMatS0= 1 NMatT0= 0 NMatD0= 1 NMtDS0= 0 NMtDT0= 0
Symmetry not used in FoFCou.
FMM levels: 10 Number of levels for PrismC: 9
Inv3: Mode=1 IEnd= 70538403.
Iteration 1 A*A^-1 deviation from unit magnitude is 6.99D-15 for 4829.
Iteration 1 A*A^-1 deviation from orthogonality is 7.01D-15 for 4824 4356.
Iteration 1 A^-1*A deviation from unit magnitude is 6.88D-15 for 4829.
Iteration 1 A^-1*A deviation from orthogonality is 3.99D-12 for 3905 3869.
E= -1789.45687079245
DIIS: error= 3.09D-02 at cycle 1 NSaved= 1.
NSaved= 1 IEnMin= 1 EnMin= -1789.45687079245 IErMin= 1 ErrMin= 3.09D-02
ErrMax= 3.09D-02 0.00D+00 EMaxC= 1.00D-01 BMatC= 1.10D+00 BMatP= 1.10D+00
IDIUse=3 WtCom= 6.91D-01 WtEn= 3.09D-01
Coeff-Com: 0.100D+01
Coeff-En: 0.100D+01
Coeff: 0.100D+01
Gap= 0.165 Goal= None Shift= 0.000
GapD= 0.165 DampG=1.000 DampE=0.500 DampFc=0.5000 IDamp=-1.
Damping current iteration by 5.00D-01
RMSDP=1.98D-03 MaxDP=1.45D-01 OVMax= 1.72D-01
Cycle 2 Pass 1 IDiag 1:
RMSU= 9.80D-04 CP: 9.79D-01
E= -1789.92596196188 Delta-E= -0.469091169427 Rises=F Damp=T
DIIS: error= 5.04D-03 at cycle 2 NSaved= 2.
NSaved= 2 IEnMin= 2 EnMin= -1789.92596196188 IErMin= 2 ErrMin= 5.04D-03
ErrMax= 5.04D-03 0.00D+00 EMaxC= 1.00D-01 BMatC= 6.69D-02 BMatP= 1.10D+00
IDIUse=3 WtCom= 9.50D-01 WtEn= 5.04D-02
Coeff-Com: -0.103D-01 0.101D+01
Coeff-En: 0.126D-01 0.987D+00
Coeff: -0.918D-02 0.101D+01
Gap= 0.140 Goal= None Shift= 0.000
RMSDP=5.47D-04 MaxDP=3.01D-02 DE=-4.69D-01 OVMax= 1.43D-01
Cycle 3 Pass 1 IDiag 1:
RMSU= 5.37D-04 CP: 9.75D-01 8.96D-01
E= -1790.38339447815 Delta-E= -0.457432516273 Rises=F Damp=F
DIIS: error= 1.12D-02 at cycle 3 NSaved= 3.
NSaved= 3 IEnMin= 3 EnMin= -1790.38339447815 IErMin= 2 ErrMin= 5.04D-03
ErrMax= 1.12D-02 0.00D+00 EMaxC= 1.00D-01 BMatC= 7.11D-02 BMatP= 6.69D-02
IDIUse=3 WtCom= 8.88D-01 WtEn= 1.12D-01
Coeff-Com: -0.644D-01 0.543D+00 0.521D+00
Coeff-En: 0.000D+00 0.000D+00 0.100D+01
Coeff: -0.571D-01 0.482D+00 0.575D+00
Gap= 0.110 Goal= None Shift= 0.000
RMSDP=4.24D-04 MaxDP=2.07D-02 DE=-4.57D-01 OVMax= 9.27D-02
Cycle 4 Pass 1 IDiag 1:
RMSU= 2.54D-04 CP: 9.77D-01 1.00D+00 3.97D-01
E= -1790.42832293703 Delta-E= -0.044928458882 Rises=F Damp=F
DIIS: error= 5.86D-03 at cycle 4 NSaved= 4.
NSaved= 4 IEnMin= 4 EnMin= -1790.42832293703 IErMin= 2 ErrMin= 5.04D-03
ErrMax= 5.86D-03 0.00D+00 EMaxC= 1.00D-01 BMatC= 2.55D-02 BMatP= 6.69D-02
IDIUse=3 WtCom= 9.41D-01 WtEn= 5.86D-02
Coeff-Com: -0.349D-01 0.156D+00 0.392D+00 0.486D+00
Coeff-En: 0.000D+00 0.000D+00 0.308D+00 0.692D+00
Coeff: -0.328D-01 0.147D+00 0.387D+00 0.498D+00
Gap= 0.113 Goal= None Shift= 0.000
RMSDP=1.82D-04 MaxDP=1.04D-02 DE=-4.49D-02 OVMax= 3.96D-02
Cycle 5 Pass 1 IDiag 1:
RMSU= 6.70D-05 CP: 9.76D-01 9.84D-01 6.06D-01 5.08D-01
E= -1790.45383360625 Delta-E= -0.025510669221 Rises=F Damp=F
DIIS: error= 9.59D-04 at cycle 5 NSaved= 5.
NSaved= 5 IEnMin= 5 EnMin= -1790.45383360625 IErMin= 5 ErrMin= 9.59D-04
ErrMax= 9.59D-04 0.00D+00 EMaxC= 1.00D-01 BMatC= 1.11D-03 BMatP= 2.55D-02
IDIUse=3 WtCom= 9.90D-01 WtEn= 9.59D-03
Coeff-Com: -0.140D-01 0.444D-01 0.180D+00 0.280D+00 0.510D+00
Coeff-En: 0.000D+00 0.000D+00 0.000D+00 0.000D+00 0.100D+01
Coeff: -0.138D-01 0.440D-01 0.178D+00 0.277D+00 0.514D+00
Gap= 0.113 Goal= None Shift= 0.000
RMSDP=3.89D-05 MaxDP=2.76D-03 DE=-2.55D-02 OVMax= 9.01D-03
Cycle 6 Pass 1 IDiag 1:
RMSU= 2.70D-05 CP: 9.75D-01 9.81D-01 6.09D-01 5.45D-01 6.13D-01
E= -1790.45475031225 Delta-E= -0.000916705995 Rises=F Damp=F
DIIS: error= 3.28D-04 at cycle 6 NSaved= 6.
NSaved= 6 IEnMin= 6 EnMin= -1790.45475031225 IErMin= 6 ErrMin= 3.28D-04
ErrMax= 3.28D-04 0.00D+00 EMaxC= 1.00D-01 BMatC= 1.17D-04 BMatP= 1.11D-03
IDIUse=3 WtCom= 9.97D-01 WtEn= 3.28D-03
Coeff-Com: -0.378D-02 0.688D-02 0.534D-01 0.963D-01 0.294D+00 0.553D+00
Coeff-En: 0.000D+00 0.000D+00 0.000D+00 0.000D+00 0.750D-01 0.925D+00
Coeff: -0.376D-02 0.686D-02 0.532D-01 0.960D-01 0.294D+00 0.554D+00
Gap= 0.113 Goal= None Shift= 0.000
RMSDP=1.39D-05 MaxDP=6.83D-04 DE=-9.17D-04 OVMax= 3.20D-03
Cycle 7 Pass 1 IDiag 1:
RMSU= 7.40D-06 CP: 9.75D-01 9.83D-01 6.12D-01 5.43D-01 6.85D-01
CP: 6.18D-01
E= -1790.45485511294 Delta-E= -0.000104800687 Rises=F Damp=F
DIIS: error= 1.10D-04 at cycle 7 NSaved= 7.
NSaved= 7 IEnMin= 7 EnMin= -1790.45485511294 IErMin= 7 ErrMin= 1.10D-04
ErrMax= 1.10D-04 0.00D+00 EMaxC= 1.00D-01 BMatC= 9.79D-06 BMatP= 1.17D-04
IDIUse=3 WtCom= 9.99D-01 WtEn= 1.10D-03
Coeff-Com: -0.126D-02 0.133D-02 0.189D-01 0.367D-01 0.135D+00 0.321D+00
Coeff-Com: 0.489D+00
Coeff-En: 0.000D+00 0.000D+00 0.000D+00 0.000D+00 0.000D+00 0.137D-01
Coeff-En: 0.986D+00
Coeff: -0.126D-02 0.133D-02 0.188D-01 0.366D-01 0.135D+00 0.320D+00
Coeff: 0.489D+00
Gap= 0.113 Goal= None Shift= 0.000
RMSDP=4.26D-06 MaxDP=2.43D-04 DE=-1.05D-04 OVMax= 8.11D-04
Cycle 8 Pass 1 IDiag 1:
RMSU= 2.62D-06 CP: 9.75D-01 9.83D-01 6.12D-01 5.47D-01 6.77D-01
CP: 6.45D-01 5.91D-01
E= -1790.45486489158 Delta-E= -0.000009778646 Rises=F Damp=F
DIIS: error= 3.02D-05 at cycle 8 NSaved= 8.
NSaved= 8 IEnMin= 8 EnMin= -1790.45486489158 IErMin= 8 ErrMin= 3.02D-05
ErrMax= 3.02D-05 0.00D+00 EMaxC= 1.00D-01 BMatC= 9.45D-07 BMatP= 9.79D-06
IDIUse=1 WtCom= 1.00D+00 WtEn= 0.00D+00
Coeff-Com: -0.168D-03-0.203D-03 0.362D-02 0.786D-02 0.372D-01 0.107D+00
Coeff-Com: 0.275D+00 0.570D+00
Coeff: -0.168D-03-0.203D-03 0.362D-02 0.786D-02 0.372D-01 0.107D+00
Coeff: 0.275D+00 0.570D+00
Gap= 0.113 Goal= None Shift= 0.000
RMSDP=1.68D-06 MaxDP=1.40D-04 DE=-9.78D-06 OVMax= 2.39D-04
Cycle 9 Pass 1 IDiag 1:
RMSU= 9.03D-07 CP: 9.75D-01 9.83D-01 6.11D-01 5.47D-01 6.81D-01
CP: 6.54D-01 6.29D-01 5.32D-01
E= -1790.45486567624 Delta-E= -0.000000784657 Rises=F Damp=F
DIIS: error= 1.02D-05 at cycle 9 NSaved= 9.
NSaved= 9 IEnMin= 9 EnMin= -1790.45486567624 IErMin= 9 ErrMin= 1.02D-05
ErrMax= 1.02D-05 0.00D+00 EMaxC= 1.00D-01 BMatC= 1.66D-07 BMatP= 9.45D-07
IDIUse=1 WtCom= 1.00D+00 WtEn= 0.00D+00
Coeff-Com: 0.667D-04-0.306D-03-0.343D-03-0.336D-03 0.452D-02 0.208D-01
Coeff-Com: 0.100D+00 0.347D+00 0.528D+00
Coeff: 0.667D-04-0.306D-03-0.343D-03-0.336D-03 0.452D-02 0.208D-01
Coeff: 0.100D+00 0.347D+00 0.528D+00
Gap= 0.113 Goal= None Shift= 0.000
RMSDP=5.50D-07 MaxDP=3.74D-05 DE=-7.85D-07 OVMax= 8.12D-05
Cycle 10 Pass 1 IDiag 1:
RMSU= 2.31D-07 CP: 9.75D-01 9.83D-01 6.12D-01 5.47D-01 6.81D-01
CP: 6.53D-01 6.39D-01 6.60D-01 6.52D-01
E= -1790.45486583220 Delta-E= -0.000000155964 Rises=F Damp=F
DIIS: error= 2.67D-06 at cycle 10 NSaved= 10.
NSaved=10 IEnMin=10 EnMin= -1790.45486583220 IErMin=10 ErrMin= 2.67D-06
ErrMax= 2.67D-06 0.00D+00 EMaxC= 1.00D-01 BMatC= 7.71D-09 BMatP= 1.66D-07
IDIUse=1 WtCom= 1.00D+00 WtEn= 0.00D+00
Coeff-Com: 0.404D-04-0.121D-03-0.377D-03-0.721D-03-0.238D-03 0.279D-02
Coeff-Com: 0.303D-01 0.127D+00 0.252D+00 0.589D+00
Coeff: 0.404D-04-0.121D-03-0.377D-03-0.721D-03-0.238D-03 0.279D-02
Coeff: 0.303D-01 0.127D+00 0.252D+00 0.589D+00
Gap= 0.113 Goal= None Shift= 0.000
RMSDP=1.08D-07 MaxDP=9.33D-06 DE=-1.56D-07 OVMax= 2.89D-05
Cycle 11 Pass 1 IDiag 1:
RMSU= 7.70D-08 CP: 9.75D-01 9.83D-01 6.12D-01 5.47D-01 6.81D-01
CP: 6.53D-01 6.43D-01 6.67D-01 6.80D-01 7.87D-01
E= -1790.45486583936 Delta-E= -0.000000007158 Rises=F Damp=F
DIIS: error= 9.94D-07 at cycle 11 NSaved= 11.
NSaved=11 IEnMin=11 EnMin= -1790.45486583936 IErMin=11 ErrMin= 9.94D-07
ErrMax= 9.94D-07 0.00D+00 EMaxC= 1.00D-01 BMatC= 9.90D-10 BMatP= 7.71D-09
IDIUse=1 WtCom= 1.00D+00 WtEn= 0.00D+00
Coeff-Com: 0.124D-04-0.254D-04-0.158D-03-0.364D-03-0.630D-03-0.908D-03
Coeff-Com: 0.461D-02 0.245D-01 0.680D-01 0.304D+00 0.601D+00
Coeff: 0.124D-04-0.254D-04-0.158D-03-0.364D-03-0.630D-03-0.908D-03
Coeff: 0.461D-02 0.245D-01 0.680D-01 0.304D+00 0.601D+00
Gap= 0.113 Goal= None Shift= 0.000
RMSDP=3.82D-08 MaxDP=2.89D-06 DE=-7.16D-09 OVMax= 1.18D-05
Cycle 12 Pass 1 IDiag 1:
RMSU= 2.58D-08 CP: 9.75D-01 9.83D-01 6.12D-01 5.47D-01 6.82D-01
CP: 6.53D-01 6.43D-01 6.66D-01 6.91D-01 8.47D-01
CP: 7.54D-01
E= -1790.45486584030 Delta-E= -0.000000000938 Rises=F Damp=F
DIIS: error= 4.07D-07 at cycle 12 NSaved= 12.
NSaved=12 IEnMin=12 EnMin= -1790.45486584030 IErMin=12 ErrMin= 4.07D-07
ErrMax= 4.07D-07 0.00D+00 EMaxC= 1.00D-01 BMatC= 1.15D-10 BMatP= 9.90D-10
IDIUse=1 WtCom= 1.00D+00 WtEn= 0.00D+00
Coeff-Com: 0.231D-05-0.121D-05-0.472D-04-0.129D-03-0.326D-03-0.795D-03
Coeff-Com: -0.655D-03-0.768D-03 0.105D-01 0.104D+00 0.319D+00 0.569D+00
Coeff: 0.231D-05-0.121D-05-0.472D-04-0.129D-03-0.326D-03-0.795D-03
Coeff: -0.655D-03-0.768D-03 0.105D-01 0.104D+00 0.319D+00 0.569D+00
Gap= 0.113 Goal= None Shift= 0.000
RMSDP=1.50D-08 MaxDP=1.23D-06 DE=-9.38D-10 OVMax= 4.22D-06
Cycle 13 Pass 1 IDiag 1:
RMSU= 9.67D-09 CP: 9.75D-01 9.83D-01 6.12D-01 5.47D-01 6.82D-01
CP: 6.53D-01 6.43D-01 6.67D-01 6.94D-01 8.60D-01
CP: 8.30D-01 7.28D-01
E= -1790.45486584034 Delta-E= -0.000000000041 Rises=F Damp=F
DIIS: error= 8.94D-08 at cycle 13 NSaved= 13.
NSaved=13 IEnMin=13 EnMin= -1790.45486584034 IErMin=13 ErrMin= 8.94D-08
ErrMax= 8.94D-08 0.00D+00 EMaxC= 1.00D-01 BMatC= 1.58D-11 BMatP= 1.15D-10
IDIUse=1 WtCom= 1.00D+00 WtEn= 0.00D+00
Coeff-Com: -0.626D-06 0.321D-05-0.300D-05-0.188D-04-0.928D-04-0.314D-03
Coeff-Com: -0.112D-02-0.456D-02-0.489D-02 0.109D-01 0.825D-01 0.309D+00
Coeff-Com: 0.609D+00
Coeff: -0.626D-06 0.321D-05-0.300D-05-0.188D-04-0.928D-04-0.314D-03
Coeff: -0.112D-02-0.456D-02-0.489D-02 0.109D-01 0.825D-01 0.309D+00
Coeff: 0.609D+00
Gap= 0.113 Goal= None Shift= 0.000
RMSDP=5.56D-09 MaxDP=3.66D-07 DE=-4.09D-11 OVMax= 2.08D-06
Error on total polarization charges = 0.01959
SCF Done: E(RB3LYP) = -1790.45486584 A.U. after 13 cycles
NFock= 13 Conv=0.56D-08 -V/T= 2.0043
KE= 1.782863153125D+03 PE=-1.454267845246D+04 EE= 5.780598325039D+03
Leave Link 502 at Sat May 27 23:57:09 2023, MaxMem= 4294967296 cpu: 6235.8
(Enter /public/apps/gs/g09/l601.exe)
Copying SCF densities to generalized density rwf, IOpCl= 0 IROHF=0.
**********************************************************************
Population analysis using the SCF density.
**********************************************************************
Alpha occ. eigenvalues -- -19.12632 -19.11876 -14.33765 -14.33466 -10.24817
Alpha occ. eigenvalues -- -10.23979 -10.22095 -10.21879 -10.21322 -10.20460
Alpha occ. eigenvalues -- -10.20291 -10.20261 -10.20224 -10.19955 -10.19814
Alpha occ. eigenvalues -- -10.19617 -10.19474 -10.19421 -10.19358 -10.19250
Alpha occ. eigenvalues -- -10.19191 -10.19168 -10.19134 -10.19016 -10.18969
Alpha occ. eigenvalues -- -10.18896 -10.18867 -10.18571 -10.18510 -10.18417
Alpha occ. eigenvalues -- -10.18286 -10.17870 -10.17046 -10.16881 -10.16431
Alpha occ. eigenvalues -- -10.16359 -10.16056 -10.15975 -10.15831 -10.15679
Alpha occ. eigenvalues -- -10.15637 -10.15384 -10.15243 -6.81410 -1.06096
Alpha occ. eigenvalues -- -1.02726 -0.98277 -0.96706 -0.90001 -0.88853
Alpha occ. eigenvalues -- -0.86077 -0.84314 -0.83364 -0.81744 -0.81277
Alpha occ. eigenvalues -- -0.80056 -0.79318 -0.77864 -0.76610 -0.75839
Alpha occ. eigenvalues -- -0.75681 -0.75310 -0.75099 -0.73759 -0.72125
Alpha occ. eigenvalues -- -0.71861 -0.70182 -0.69800 -0.67145 -0.66135
Alpha occ. eigenvalues -- -0.64097 -0.63857 -0.62779 -0.62507 -0.62240
Alpha occ. eigenvalues -- -0.60235 -0.59743 -0.59316 -0.58535 -0.56202
Alpha occ. eigenvalues -- -0.55572 -0.54767 -0.54513 -0.54452 -0.53676
Alpha occ. eigenvalues -- -0.52608 -0.52201 -0.51766 -0.50918 -0.50163
Alpha occ. eigenvalues -- -0.48225 -0.47850 -0.47352 -0.46665 -0.46441
Alpha occ. eigenvalues -- -0.45579 -0.45387 -0.45310 -0.45165 -0.44969
Alpha occ. eigenvalues -- -0.44145 -0.43836 -0.43783 -0.43422 -0.43135
Alpha occ. eigenvalues -- -0.42972 -0.42179 -0.41975 -0.41750 -0.41468
Alpha occ. eigenvalues -- -0.41280 -0.41040 -0.40903 -0.40783 -0.40643
Alpha occ. eigenvalues -- -0.40243 -0.40054 -0.39726 -0.39522 -0.39157
Alpha occ. eigenvalues -- -0.38401 -0.37853 -0.37447 -0.37296 -0.37074
Alpha occ. eigenvalues -- -0.36960 -0.36731 -0.36381 -0.35811 -0.35407
Alpha occ. eigenvalues -- -0.34875 -0.34152 -0.33701 -0.33444 -0.33381
Alpha occ. eigenvalues -- -0.32524 -0.31794 -0.30687 -0.29660 -0.29265
Alpha occ. eigenvalues -- -0.28233 -0.25742 -0.25530 -0.25031 -0.24876
Alpha occ. eigenvalues -- -0.24244 -0.24087 -0.23706 -0.21826 -0.20225
Alpha virt. eigenvalues -- -0.08913 -0.06756 -0.05882 -0.03294 -0.02836
Alpha virt. eigenvalues -- -0.00381 -0.00305 -0.00173 0.01623 0.02779
Alpha virt. eigenvalues -- 0.03001 0.03714 0.04380 0.05048 0.05471
Alpha virt. eigenvalues -- 0.05812 0.06323 0.06769 0.07037 0.07247
Alpha virt. eigenvalues -- 0.07637 0.07938 0.07989 0.08510 0.08683
Alpha virt. eigenvalues -- 0.08922 0.09154 0.09515 0.09849 0.10487
Alpha virt. eigenvalues -- 0.10879 0.11324 0.11639 0.11902 0.12477
Alpha virt. eigenvalues -- 0.12907 0.13385 0.13672 0.14328 0.14817
Alpha virt. eigenvalues -- 0.14993 0.15163 0.15262 0.15660 0.15932
Alpha virt. eigenvalues -- 0.16338 0.16575 0.17015 0.17427 0.17675
Alpha virt. eigenvalues -- 0.18024 0.18741 0.19832 0.20633 0.20807
Alpha virt. eigenvalues -- 0.20846 0.21339 0.21963 0.22442 0.23101
Alpha virt. eigenvalues -- 0.23558 0.23696 0.23972 0.24493 0.25209
Alpha virt. eigenvalues -- 0.25477 0.25789 0.26298 0.26596 0.26713
Alpha virt. eigenvalues -- 0.26794 0.27431 0.27573 0.27783 0.28692
Alpha virt. eigenvalues -- 0.28781 0.29138 0.29230 0.29439 0.29686
Alpha virt. eigenvalues -- 0.29808 0.30343 0.30634 0.31420 0.31738
Alpha virt. eigenvalues -- 0.32145 0.32338 0.32640 0.33001 0.33333
Alpha virt. eigenvalues -- 0.33656 0.33842 0.34794 0.35286 0.35483
Alpha virt. eigenvalues -- 0.35615 0.35835 0.36248 0.36539 0.36571
Alpha virt. eigenvalues -- 0.37060 0.37263 0.37899 0.38023 0.38190
Alpha virt. eigenvalues -- 0.38494 0.38847 0.39272 0.39556 0.39696
Alpha virt. eigenvalues -- 0.39998 0.40338 0.40477 0.40802 0.41025
Alpha virt. eigenvalues -- 0.41245 0.41662 0.41768 0.42196 0.42438
Alpha virt. eigenvalues -- 0.42528 0.42875 0.43239 0.43473 0.43630
Alpha virt. eigenvalues -- 0.43899 0.44298 0.44785 0.44875 0.45327
Alpha virt. eigenvalues -- 0.45491 0.45829 0.46171 0.46629 0.47082
Alpha virt. eigenvalues -- 0.47225 0.47438 0.47701 0.48124 0.48318
Alpha virt. eigenvalues -- 0.48502 0.49122 0.49534 0.49974 0.50190
Alpha virt. eigenvalues -- 0.50204 0.50382 0.50576 0.51118 0.51348
Alpha virt. eigenvalues -- 0.51831 0.52031 0.52210 0.52514 0.52905
Alpha virt. eigenvalues -- 0.53653 0.54010 0.54350 0.54721 0.55139
Alpha virt. eigenvalues -- 0.55615 0.56009 0.56112 0.56651 0.56747
Alpha virt. eigenvalues -- 0.56965 0.57538 0.57927 0.58328 0.58546
Alpha virt. eigenvalues -- 0.58846 0.59026 0.59471 0.59547 0.59946
Alpha virt. eigenvalues -- 0.60205 0.60398 0.60553 0.60720 0.60998
Alpha virt. eigenvalues -- 0.61019 0.61227 0.61865 0.62123 0.62462
Alpha virt. eigenvalues -- 0.62576 0.63081 0.63561 0.63745 0.64091
Alpha virt. eigenvalues -- 0.64535 0.64728 0.65005 0.65182 0.65326
Alpha virt. eigenvalues -- 0.65820 0.66227 0.66479 0.66587 0.66791
Alpha virt. eigenvalues -- 0.67234 0.67345 0.67458 0.68608 0.69114
Alpha virt. eigenvalues -- 0.69610 0.70003 0.70221 0.70414 0.70681
Alpha virt. eigenvalues -- 0.71065 0.71316 0.71453 0.71983 0.72002
Alpha virt. eigenvalues -- 0.72861 0.73385 0.73524 0.74185 0.74458
Alpha virt. eigenvalues -- 0.75067 0.75345 0.75552 0.75972 0.76411
Alpha virt. eigenvalues -- 0.76915 0.77503 0.77616 0.77913 0.78455
Alpha virt. eigenvalues -- 0.78642 0.79194 0.79503 0.79818 0.80198
Alpha virt. eigenvalues -- 0.80580 0.80920 0.81232 0.81945 0.82140
Alpha virt. eigenvalues -- 0.82512 0.82891 0.83900 0.84287 0.85379
Alpha virt. eigenvalues -- 0.85513 0.85895 0.86307 0.86528 0.86990
Alpha virt. eigenvalues -- 0.87216 0.87596 0.88270 0.88470 0.88843
Alpha virt. eigenvalues -- 0.88948 0.89401 0.89867 0.91119 0.91746
Alpha virt. eigenvalues -- 0.92666 0.93251 0.93475 0.94430 0.95430
Alpha virt. eigenvalues -- 0.96002 0.96636 0.96697 0.97281 0.98076
Alpha virt. eigenvalues -- 0.98230 0.98706 0.99015 0.99613 0.99928
Alpha virt. eigenvalues -- 1.00254 1.00537 1.01257 1.01580 1.01788
Alpha virt. eigenvalues -- 1.02100 1.02696 1.02792 1.03619 1.03918
Alpha virt. eigenvalues -- 1.04566 1.05067 1.05423 1.05856 1.06142
Alpha virt. eigenvalues -- 1.06390 1.07293 1.07522 1.08021 1.08066
Alpha virt. eigenvalues -- 1.08755 1.09040 1.09302 1.09776 1.09897
Alpha virt. eigenvalues -- 1.10785 1.11377 1.12471 1.12760 1.13064
Alpha virt. eigenvalues -- 1.13683 1.13892 1.14246 1.14789 1.14968
Alpha virt. eigenvalues -- 1.15856 1.16119 1.16829 1.18462 1.19489
Alpha virt. eigenvalues -- 1.20056 1.20108 1.21067 1.21436 1.22216
Alpha virt. eigenvalues -- 1.22837 1.22959 1.24248 1.24535 1.25888
Alpha virt. eigenvalues -- 1.26680 1.27516 1.27782 1.29271 1.29593
Alpha virt. eigenvalues -- 1.29782 1.31523 1.32271 1.32560 1.32975
Alpha virt. eigenvalues -- 1.34423 1.35406 1.35681 1.36523 1.36959
Alpha virt. eigenvalues -- 1.38007 1.38545 1.38957 1.39705 1.40059
Alpha virt. eigenvalues -- 1.40439 1.40997 1.41925 1.42311 1.42621
Alpha virt. eigenvalues -- 1.43569 1.44008 1.44447 1.45014 1.45183
Alpha virt. eigenvalues -- 1.45621 1.45985 1.46262 1.46966 1.47214
Alpha virt. eigenvalues -- 1.47629 1.48072 1.48200 1.48700 1.49026
Alpha virt. eigenvalues -- 1.49114 1.49567 1.50318 1.51064 1.51328
Alpha virt. eigenvalues -- 1.51457 1.51724 1.52257 1.52630 1.52974
Alpha virt. eigenvalues -- 1.53462 1.53694 1.54076 1.54155 1.54369
Alpha virt. eigenvalues -- 1.55248 1.55707 1.55783 1.56131 1.56706
Alpha virt. eigenvalues -- 1.56769 1.57260 1.57347 1.57894 1.58129
Alpha virt. eigenvalues -- 1.58685 1.58787 1.59135 1.59493 1.60012
Alpha virt. eigenvalues -- 1.60360 1.60563 1.61158 1.61893 1.62117
Alpha virt. eigenvalues -- 1.62532 1.63089 1.63292 1.64012 1.64389
Alpha virt. eigenvalues -- 1.64824 1.65036 1.65594 1.65712 1.66190
Alpha virt. eigenvalues -- 1.67135 1.67250 1.68005 1.68523 1.68909
Alpha virt. eigenvalues -- 1.69259 1.69765 1.69984 1.70285 1.71267
Alpha virt. eigenvalues -- 1.71855 1.71968 1.72446 1.72614 1.72794
Alpha virt. eigenvalues -- 1.72999 1.73399 1.74370 1.74689 1.75064
Alpha virt. eigenvalues -- 1.75464 1.75803 1.75843 1.76484 1.76986
Alpha virt. eigenvalues -- 1.77498 1.77804 1.78206 1.78649 1.78927
Alpha virt. eigenvalues -- 1.78979 1.79252 1.79616 1.80523 1.81326
Alpha virt. eigenvalues -- 1.81624 1.82486 1.83024 1.83575 1.83912
Alpha virt. eigenvalues -- 1.84799 1.85509 1.85781 1.86216 1.86665
Alpha virt. eigenvalues -- 1.86949 1.87213 1.87836 1.88304 1.88482
Alpha virt. eigenvalues -- 1.89770 1.89938 1.90785 1.90926 1.91009
Alpha virt. eigenvalues -- 1.91101 1.91789 1.91921 1.92249 1.92547
Alpha virt. eigenvalues -- 1.93328 1.94114 1.94450 1.95274 1.95504
Alpha virt. eigenvalues -- 1.95752 1.96295 1.96583 1.96891 1.97421
Alpha virt. eigenvalues -- 1.97447 1.97683 1.98178 1.99045 1.99536
Alpha virt. eigenvalues -- 2.00166 2.00670 2.00844 2.01668 2.01781
Alpha virt. eigenvalues -- 2.02527 2.03250 2.03656 2.04129 2.04459
Alpha virt. eigenvalues -- 2.05099 2.05811 2.05949 2.06363 2.06738
Alpha virt. eigenvalues -- 2.07065 2.07800 2.08483 2.09440 2.09579
Alpha virt. eigenvalues -- 2.09763 2.10041 2.10760 2.12256 2.12827
Alpha virt. eigenvalues -- 2.13218 2.14252 2.14528 2.15213 2.15692
Alpha virt. eigenvalues -- 2.16775 2.17384 2.17974 2.18242 2.18415
Alpha virt. eigenvalues -- 2.20052 2.20695 2.21606 2.22437 2.24452
Alpha virt. eigenvalues -- 2.25141 2.26137 2.26559 2.26834 2.27829
Alpha virt. eigenvalues -- 2.28988 2.30237 2.31112 2.32259 2.32652
Alpha virt. eigenvalues -- 2.33442 2.34459 2.34822 2.34969 2.35278
Alpha virt. eigenvalues -- 2.35632 2.36168 2.36528 2.36842 2.37116
Alpha virt. eigenvalues -- 2.37180 2.37714 2.37920 2.38516 2.39414
Alpha virt. eigenvalues -- 2.39905 2.40757 2.41410 2.41800 2.42301
Alpha virt. eigenvalues -- 2.43422 2.43806 2.44158 2.44675 2.45169
Alpha virt. eigenvalues -- 2.45705 2.46223 2.46970 2.48863 2.49329
Alpha virt. eigenvalues -- 2.49634 2.50902 2.51120 2.51622 2.52407
Alpha virt. eigenvalues -- 2.52510 2.53716 2.53901 2.55106 2.55485
Alpha virt. eigenvalues -- 2.56065 2.56608 2.57216 2.57679 2.58182
Alpha virt. eigenvalues -- 2.58485 2.58677 2.58933 2.59202 2.60324
Alpha virt. eigenvalues -- 2.60479 2.60782 2.61213 2.62253 2.62519
Alpha virt. eigenvalues -- 2.62740 2.62862 2.63150 2.63784 2.64129
Alpha virt. eigenvalues -- 2.64658 2.65109 2.65364 2.65810 2.65973
Alpha virt. eigenvalues -- 2.66379 2.66926 2.67159 2.67403 2.67791
Alpha virt. eigenvalues -- 2.68030 2.68343 2.68806 2.69400 2.69855
Alpha virt. eigenvalues -- 2.70378 2.70898 2.71128 2.71834 2.71960
Alpha virt. eigenvalues -- 2.72339 2.72932 2.73922 2.74596 2.74952
Alpha virt. eigenvalues -- 2.75166 2.75251 2.75864 2.76265 2.76824
Alpha virt. eigenvalues -- 2.76977 2.77408 2.78001 2.78758 2.79090
Alpha virt. eigenvalues -- 2.79550 2.79793 2.80530 2.81276 2.81876
Alpha virt. eigenvalues -- 2.82487 2.83275 2.83434 2.85780 2.86220
Alpha virt. eigenvalues -- 2.86491 2.87197 2.87298 2.88701 2.89034
Alpha virt. eigenvalues -- 2.89721 2.90024 2.90610 2.90979 2.91891
Alpha virt. eigenvalues -- 2.92439 2.92965 2.93406 2.93630 2.94107
Alpha virt. eigenvalues -- 2.95863 2.96578 2.99345 2.99844 3.00386
Alpha virt. eigenvalues -- 3.01258 3.01547 3.02004 3.03487 3.04813
Alpha virt. eigenvalues -- 3.05452 3.05802 3.06424 3.06823 3.07239
Alpha virt. eigenvalues -- 3.08995 3.09679 3.11432 3.11852 3.13099
Alpha virt. eigenvalues -- 3.14805 3.14963 3.15172 3.17049 3.17861
Alpha virt. eigenvalues -- 3.18296 3.19994 3.21067 3.21477 3.22464
Alpha virt. eigenvalues -- 3.23817 3.25525 3.26600 3.28223 3.29223
Alpha virt. eigenvalues -- 3.31180 3.31652 3.32355 3.33728 3.34537
Alpha virt. eigenvalues -- 3.34804 3.36212 3.37165 3.37725 3.38305
Alpha virt. eigenvalues -- 3.38857 3.40125 3.41147 3.41455 3.41738
Alpha virt. eigenvalues -- 3.42575 3.43830 3.44367 3.44590 3.45574
Alpha virt. eigenvalues -- 3.47182 3.47682 3.49529 3.51245 3.52203
Alpha virt. eigenvalues -- 3.52579 3.53512 3.56395 3.57088 3.57521
Alpha virt. eigenvalues -- 3.59318 3.62393 3.62944 3.65603 3.67650
Alpha virt. eigenvalues -- 3.68196 3.71095 3.73179 3.77312 3.79312
Alpha virt. eigenvalues -- 3.79977 3.80195 3.80702 3.82343 3.84976
Alpha virt. eigenvalues -- 3.85366 3.86252 3.88260 3.88996 3.93066
Alpha virt. eigenvalues -- 3.93780 3.95256 3.96104 3.97216 3.98837
Alpha virt. eigenvalues -- 3.99365 4.00655 4.01077 4.01608 4.02491
Alpha virt. eigenvalues -- 4.04072 4.04969 4.08578 4.10275 4.13388
Alpha virt. eigenvalues -- 4.16388 4.16887 4.17120 4.18317 4.25807
Alpha virt. eigenvalues -- 4.29152 4.31624 4.31845 4.33699 4.39264
Alpha virt. eigenvalues -- 4.40116 4.46549 4.52422 4.61731 4.63423
Alpha virt. eigenvalues -- 4.79792 4.80553 4.81008 4.83183 4.85026
Alpha virt. eigenvalues -- 4.88260 5.12293 5.14127 5.17098 5.19145
Alpha virt. eigenvalues -- 5.22294 5.32750 5.74512 5.77482 14.62881
Alpha virt. eigenvalues -- 23.42367 23.55720 23.56654 23.66339 23.72828
Alpha virt. eigenvalues -- 23.74084 23.77098 23.81557 23.85295 23.87072
Alpha virt. eigenvalues -- 23.89558 23.90191 23.91114 23.92433 23.92887
Alpha virt. eigenvalues -- 23.93600 23.94495 23.96003 23.96268 23.96979
Alpha virt. eigenvalues -- 23.97282 23.99052 23.99198 23.99453 24.02423
Alpha virt. eigenvalues -- 24.02703 24.05140 24.09892 24.10740 24.11258
Alpha virt. eigenvalues -- 24.11501 24.13968 24.15388 24.16936 24.17542
Alpha virt. eigenvalues -- 24.17901 24.18063 24.18446 24.22626 35.58679
Alpha virt. eigenvalues -- 35.59832 49.98495 50.00709
Condensed to atoms (all electrons):
Mulliken charges:
1
1 C 0.169901
2 C 0.026021
3 C -0.071768
4 C 0.138203
5 C -0.109265
6 C -0.061408
7 C -0.043564
8 C -0.111887
9 C -0.103559
10 C -0.062506
11 C -0.062757
12 C -0.065743
13 C -0.075880
14 C -0.119113
15 B 0.586592
16 O -0.430395
17 O -0.412397
18 C -0.081153
19 C -0.070785
20 C -0.117657
21 C -0.115610
22 C -0.116952
23 C -0.070079
24 H 0.119931
25 H 0.099281
26 H 0.107363
27 H 0.103010
28 H 0.095300
29 H 0.095357
30 H 0.117706
31 H 0.115325
32 H 0.097286
33 H 0.099907
34 H 0.099036
35 H 0.117220
36 C -0.045806
37 C -0.091447
38 C 0.005649
39 N -0.455151
40 C -0.226949
41 N -0.435476
42 C -0.274146
43 C -0.227123
44 C -0.087053
45 C -0.097264
46 C -0.042779
47 C -0.247119
48 C -0.280075
49 C 0.245223
50 C 0.228010
51 C -0.123161
52 C -0.166196
53 C 0.151157
54 C 0.149880
55 C -0.160239
56 C -0.123626
57 H 0.107283
58 H 0.126345
59 H 0.144513
60 H 0.140418
61 H 0.120118
62 H 0.125945
63 H 0.152003
64 H 0.138914
65 H 0.121656
66 H 0.142619
67 H 0.143548
68 H 0.130637
69 H 0.122468
70 H 0.102352
71 H 0.140979
72 H 0.133972
73 H 0.128058
74 H 0.097205
75 H 0.099697
Sum of Mulliken charges = -0.00000
Mulliken charges with hydrogens summed into heavy atoms:
1
1 C 0.169901
2 C 0.026021
3 C -0.071768
4 C 0.138203
5 C 0.010666
6 C 0.037873
7 C -0.043564
8 C -0.111887
9 C -0.103559
10 C -0.062506
11 C 0.044605
12 C 0.037267
13 C 0.019420
14 C -0.023756
15 B 0.586592
16 O -0.430395
17 O -0.412397
18 C 0.036553
19 C 0.044540
20 C -0.020371
21 C -0.015702
22 C -0.017916
23 C 0.047140
36 C 0.061476
37 C 0.034898
38 C 0.005649
39 N -0.455151
40 C 0.178100
41 N -0.435476
42 C 0.142716
43 C 0.180700
44 C 0.043585
45 C 0.025204
46 C 0.059574
47 C -0.247119
48 C 0.122934
49 C 0.245223
50 C 0.228010
51 C -0.123161
52 C -0.068991
53 C 0.151157
54 C 0.149880
55 C -0.060542
56 C -0.123626
Electronic spatial extent (au): <R**2>= 23404.4804
Charge= 0.0000 electrons
Dipole moment (field-independent basis, Debye):
X= 10.3024 Y= -0.7442 Z= -0.2596 Tot= 10.3326
Quadrupole moment (field-independent basis, Debye-Ang):
XX= -210.8839 YY= -230.7564 ZZ= -250.1453
XY= -2.0677 XZ= 4.8019 YZ= -5.1489
Traceless Quadrupole moment (field-independent basis, Debye-Ang):
XX= 19.7113 YY= -0.1612 ZZ= -19.5501
XY= -2.0677 XZ= 4.8019 YZ= -5.1489
Octapole moment (field-independent basis, Debye-Ang**2):
XXX= 445.0639 YYY= 4.2842 ZZZ= -2.7264 XYY= 3.6474
XXY= -1.2956 XXZ= 3.4042 XZZ= 37.6849 YZZ= -7.2968
YYZ= -0.2090 XYZ= 12.5806
Hexadecapole moment (field-independent basis, Debye-Ang**3):
XXXX= -20378.5958 YYYY= -7116.7463 ZZZZ= -2050.5172 XXXY= -172.7185
XXXZ= 69.4569 YYYX= 97.2967 YYYZ= -68.7499 ZZZX= 45.2471
ZZZY= -50.2705 XXYY= -4906.5474 XXZZ= -4059.0004 YYZZ= -1512.7883
XXYZ= -86.8532 YYXZ= 73.7656 ZZXY= -57.3006
N-N= 5.188762108453D+03 E-N=-1.454267847330D+04 KE= 1.782863153125D+03
No NMR shielding tensors so no spin-rotation constants.
Leave Link 601 at Sat May 27 23:57:10 2023, MaxMem= 4294967296 cpu: 18.7
(Enter /public/apps/gs/g09/l701.exe)
Compute integral first derivatives.
... and contract with generalized density number 0.
R6Disp: Adding Grimme-D3(BJ) dispersion energy 1st derivatives to the gradient.
D1PCM: PCM CHGder 1st derivatives, ID1Alg=3 FixD1E=F DoIter=F DoCFld=F I1PDM=0.
GePol: Maximum number of non-zero 1st derivatives = 199
Leave Link 701 at Sat May 27 23:57:15 2023, MaxMem= 4294967296 cpu: 170.3
(Enter /public/apps/gs/g09/l702.exe)
L702 exits ... SP integral derivatives will be done elsewhere.
Leave Link 702 at Sat May 27 23:57:15 2023, MaxMem= 4294967296 cpu: 0.5
(Enter /public/apps/gs/g09/l703.exe)
Compute integral first derivatives, UseDBF=F ICtDFT= 0.
Integral derivatives from FoFJK, PRISM(SPDF).
Calling FoFJK, ICntrl= 2127 FMM=T ISym2X=0 I1Cent= 0 IOpClX= 0 NMat=1 NMatS=1 NMatT=0.
FoFJK: IHMeth= 1 ICntrl= 2127 DoSepK=F KAlg= 0 I1Cent= 0 FoldK=F
IRaf= 0 NMat= 1 IRICut= 1 DoRegI=T DoRafI=F ISym2E= 0.
FoFCou: FMM=T IPFlag= 0 FMFlag= 100000 FMFlg1= 2001
NFxFlg= 0 DoJE=F BraDBF=F KetDBF=F FulRan=T
wScrn= 0.000000 ICntrl= 2127 IOpCl= 0 I1Cent= 0 NGrid= 0
NMat0= 1 NMatS0= 1 NMatT0= 0 NMatD0= 1 NMtDS0= 0 NMtDT0= 0
Symmetry not used in FoFCou.
FMM levels: 10 Number of levels for PrismC: 9
Leave Link 703 at Sat May 27 23:57:53 2023, MaxMem= 4294967296 cpu: 1202.0
(Enter /public/apps/gs/g09/l716.exe)
Dipole = 4.05329455D+00-2.92808557D-01-1.02134185D-01
-------------------------------------------------------------------
Center Atomic Forces (Hartrees/Bohr)
Number Number X Y Z
-------------------------------------------------------------------
1 6 0.004664502 -0.001416451 -0.000705432
2 6 -0.001163597 -0.000459721 0.000619862
3 6 -0.000950131 -0.000179482 -0.000125649
4 6 0.002715866 0.002413696 0.000037646
5 6 -0.000779578 0.000531812 -0.000468179
6 6 0.000297625 -0.000188248 -0.000282647
7 6 -0.000230629 0.000404035 -0.000160377
8 6 0.000986482 -0.000453932 -0.000265203
9 6 0.000283827 0.000628650 0.000060087
10 6 -0.000125250 -0.000124672 -0.000043770
11 6 0.000303290 0.000214309 0.000264372
12 6 0.000233367 0.000280308 0.000188721
13 6 0.000281428 -0.000312624 -0.000114232
14 6 -0.000241984 -0.000206730 0.000082206
15 5 0.007211349 -0.000316981 -0.000165173
16 8 -0.006305951 0.002359352 -0.000468784
17 8 -0.004404269 -0.002659930 0.001207017
18 6 -0.000227423 -0.000666159 0.000485628
19 6 -0.000129825 -0.000118501 0.000140201
20 6 -0.000067452 -0.000134113 0.000293768
21 6 -0.000445125 0.000126518 -0.000112568
22 6 -0.000172001 -0.000103783 -0.000089915
23 6 -0.000349441 0.000024697 0.000105641
24 1 0.000009514 -0.000096357 0.000176482
25 1 0.000159237 0.000124963 0.000006443
26 1 0.000187941 0.000086220 -0.000113460
27 1 0.000178917 0.000009191 -0.000068242
28 1 0.000151294 0.000191552 -0.000096770
29 1 -0.000229683 0.000291095 0.000124542
30 1 -0.000113670 0.000000133 -0.000198169
31 1 0.000202252 0.000090167 -0.000128475
32 1 -0.000177463 -0.000005449 -0.000324854
33 1 0.000002224 -0.000311983 -0.000063466
34 1 -0.000002334 -0.000065656 0.000317609
35 1 0.000239181 0.000054297 -0.000029040
36 6 -0.000319700 0.000140398 -0.000229174
37 6 0.000015912 0.000006080 -0.000118764
38 6 0.001607066 0.000451204 0.000479174
39 7 -0.001778820 0.001812628 0.000815388
40 6 -0.000244501 -0.000085325 -0.000050200
41 7 -0.002564815 -0.001666338 -0.000884950
42 6 -0.000480055 -0.000150861 0.000272851
43 6 -0.000273561 0.000175190 0.000072824
44 6 0.000208273 -0.000053097 0.000045659
45 6 -0.000101660 -0.000012375 0.000031944
46 6 -0.000334327 -0.000085638 0.000072105
47 6 0.000359649 -0.000048756 0.000049581
48 6 -0.000361992 -0.000090011 -0.000311579
49 6 0.000291049 -0.000089454 -0.000039751
50 6 -0.000135189 -0.000857536 -0.000302285
51 6 0.001463339 0.001018450 0.000798977
52 6 -0.002657861 0.000482611 -0.000293852
53 6 0.002095917 -0.001904305 -0.000574466
54 6 0.002056152 0.001256005 0.000757064
55 6 -0.002161825 0.000087229 -0.000167181
56 6 0.001308186 -0.000732447 -0.000145214
57 1 0.000181791 0.000062317 -0.000124819
58 1 -0.000049857 -0.000060753 0.000212842
59 1 -0.000129026 0.000014395 0.000214317
60 1 -0.000006338 0.000215184 -0.000157159
61 1 0.000070154 0.000070415 -0.000014509
62 1 0.000036986 0.000059070 -0.000065391
63 1 -0.000112819 -0.000144634 -0.000094192
64 1 -0.000064803 0.000046695 -0.000305953
65 1 0.000054517 -0.000108483 -0.000086253
66 1 -0.000075216 -0.000040279 -0.000233977
67 1 -0.000167361 -0.000130542 0.000157986
68 1 -0.000237988 0.000069608 -0.000062620
69 1 0.000088663 0.000088187 -0.000143918
70 1 0.000033687 -0.000060642 0.000204153
71 1 0.000052594 0.000279267 -0.000085917
72 1 -0.000102034 -0.000010672 0.000314775
73 1 0.000036854 0.000014306 0.000001814
74 1 0.000208828 -0.000005374 -0.000074398
75 1 0.000197643 -0.000021940 -0.000020752
-------------------------------------------------------------------
Cartesian Forces: Max 0.007211349 RMS 0.001007844
Leave Link 716 at Sat May 27 23:57:53 2023, MaxMem= 4294967296 cpu: 4.0
(Enter /public/apps/gs/g09/l103.exe)
GradGradGradGradGradGradGradGradGradGradGradGradGradGradGradGradGradGrad
Berny optimization.
FormGI is forming the generalized inverse of G from B-inverse, IUseBI=4.
Internal Forces: Max 0.003818603 RMS 0.000402557
Search for a local minimum.
Step number 1 out of a maximum of 450
All quantities printed in internal units (Hartrees-Bohrs-Radians)
RMS Force = .40256D-03 SwitMx=.10000D-02 MixMth= 2
Mixed Optimization -- En-DIIS/RFO-DIIS
Second derivative matrix not updated -- first step.
ITU= 0
Eigenvalues --- 0.00569 0.00803 0.00805 0.00887 0.00914
Eigenvalues --- 0.00923 0.01071 0.01243 0.01419 0.01427
Eigenvalues --- 0.01514 0.01515 0.01548 0.01598 0.01636
Eigenvalues --- 0.01714 0.01715 0.01741 0.01747 0.01752
Eigenvalues --- 0.01767 0.01784 0.01793 0.01802 0.01955
Eigenvalues --- 0.01971 0.01991 0.01995 0.02019 0.02033
Eigenvalues --- 0.02035 0.02042 0.02050 0.02065 0.02096
Eigenvalues --- 0.02110 0.02110 0.02116 0.02133 0.02133
Eigenvalues --- 0.02137 0.02142 0.02150 0.02164 0.02168
Eigenvalues --- 0.02169 0.02169 0.02170 0.02171 0.02175
Eigenvalues --- 0.02176 0.02180 0.02180 0.02182 0.02210
Eigenvalues --- 0.02213 0.02247 0.02272 0.02290 0.02296
Eigenvalues --- 0.02361 0.04398 0.06730 0.07149 0.07155
Eigenvalues --- 0.07208 0.07287 0.07331 0.07332 0.07463
Eigenvalues --- 0.07555 0.08075 0.11944 0.13041 0.15988
Eigenvalues --- 0.15989 0.15996 0.15997 0.15998 0.15998
Eigenvalues --- 0.15998 0.15999 0.15999 0.15999 0.15999
Eigenvalues --- 0.16000 0.16000 0.16000 0.16000 0.16000
Eigenvalues --- 0.16000 0.16000 0.16000 0.16000 0.16000
Eigenvalues --- 0.16000 0.16000 0.16000 0.16000 0.16000
Eigenvalues --- 0.16000 0.16000 0.16000 0.16000 0.16000
Eigenvalues --- 0.20500 0.21643 0.21998 0.21999 0.22000
Eigenvalues --- 0.22000 0.22378 0.22413 0.22674 0.22731
Eigenvalues --- 0.23483 0.23715 0.23740 0.23769 0.24008
Eigenvalues --- 0.24319 0.24338 0.24626 0.24652 0.24694
Eigenvalues --- 0.24804 0.24875 0.24878 0.24918 0.24930
Eigenvalues --- 0.24982 0.24988 0.24999 0.24999 0.25000
Eigenvalues --- 0.25000 0.26052 0.26488 0.32103 0.32676
Eigenvalues --- 0.32692 0.33355 0.33577 0.33652 0.34294
Eigenvalues --- 0.34566 0.34572 0.34581 0.34585 0.34639
Eigenvalues --- 0.34639 0.34676 0.34696 0.34700 0.34779
Eigenvalues --- 0.34800 0.35277 0.35431 0.35441 0.35486
Eigenvalues --- 0.35491 0.35518 0.35521 0.35524 0.35566
Eigenvalues --- 0.35567 0.35568 0.35571 0.35574 0.35574
Eigenvalues --- 0.35576 0.35595 0.35623 0.35826 0.35927
Eigenvalues --- 0.36027 0.36035 0.36537 0.36613 0.36637
Eigenvalues --- 0.38334 0.38493 0.38693 0.39232 0.40075
Eigenvalues --- 0.40141 0.40508 0.40870 0.41037 0.41880
Eigenvalues --- 0.41959 0.42256 0.42336 0.42351 0.42719
Eigenvalues --- 0.43007 0.43096 0.43402 0.43821 0.43941
Eigenvalues --- 0.44116 0.45370 0.45603 0.46092 0.46243
Eigenvalues --- 0.46426 0.46506 0.46711 0.46901 0.48273
Eigenvalues --- 0.48384 0.49543 0.49680 0.49914 0.50287
Eigenvalues --- 0.51285 0.51960 0.52463 0.52654
RFO step: Lambda=-2.48236818D-04 EMin= 5.69333669D-03
Linear search not attempted -- first point.
Iteration 1 RMS(Cart)= 0.01068265 RMS(Int)= 0.00002110
Iteration 2 RMS(Cart)= 0.00004589 RMS(Int)= 0.00000400
Iteration 3 RMS(Cart)= 0.00000000 RMS(Int)= 0.00000400
ITry= 1 IFail=0 DXMaxC= 5.14D-02 DCOld= 1.00D+10 DXMaxT= 3.00D-01 DXLimC= 3.00D+00 Rises=F
Variable Old X -DE/DX Delta X Delta X Delta X New X
(Linear) (Quad) (Total)
R1 2.62884 0.00099 0.00000 0.00214 0.00213 2.63097
R2 2.68134 0.00056 0.00000 0.00136 0.00136 2.68270
R3 2.55832 -0.00382 0.00000 -0.00704 -0.00704 2.55129
R4 2.80490 -0.00014 0.00000 -0.00041 -0.00042 2.80448
R5 2.71675 -0.00051 0.00000 -0.00124 -0.00124 2.71551
R6 2.61730 0.00066 0.00000 0.00123 0.00123 2.61852
R7 2.71328 -0.00033 0.00000 -0.00078 -0.00078 2.71250
R8 2.56967 -0.00289 0.00000 -0.00564 -0.00564 2.56402
R9 2.67233 0.00030 0.00000 0.00071 0.00071 2.67304
R10 2.58248 -0.00044 0.00000 -0.00087 -0.00087 2.58161
R11 2.04720 -0.00015 0.00000 -0.00041 -0.00041 2.04679
R12 2.68089 0.00017 0.00000 0.00033 0.00033 2.68122
R13 2.04893 0.00005 0.00000 0.00014 0.00014 2.04907
R14 2.70318 0.00036 0.00000 0.00079 0.00079 2.70397
R15 2.67913 -0.00006 0.00000 -0.00016 -0.00016 2.67896
R16 2.68535 0.00029 0.00000 0.00067 0.00067 2.68603
R17 2.70707 0.00011 0.00000 0.00022 0.00022 2.70730
R18 2.68607 0.00018 0.00000 0.00042 0.00042 2.68650
R19 2.68107 0.00027 0.00000 0.00056 0.00056 2.68163
R20 2.68127 -0.00014 0.00000 -0.00036 -0.00036 2.68091
R21 2.58663 -0.00053 0.00000 -0.00107 -0.00107 2.58556
R22 2.04885 -0.00009 0.00000 -0.00024 -0.00024 2.04861
R23 2.59457 0.00045 0.00000 0.00089 0.00089 2.59546
R24 2.04964 -0.00000 0.00000 -0.00000 -0.00000 2.04964
R25 2.59639 0.00056 0.00000 0.00113 0.00113 2.59752
R26 2.04980 0.00017 0.00000 0.00047 0.00047 2.05027
R27 2.66922 0.00023 0.00000 0.00056 0.00056 2.66978
R28 2.04766 0.00036 0.00000 0.00101 0.00101 2.04867
R29 2.76520 0.00280 0.00000 0.00795 0.00796 2.77316
R30 2.76623 0.00230 0.00000 0.00652 0.00653 2.77276
R31 2.96085 -0.00073 0.00000 -0.00321 -0.00321 2.95764
R32 2.95004 -0.00103 0.00000 -0.00433 -0.00433 2.94571
R33 2.04675 -0.00019 0.00000 -0.00054 -0.00054 2.04621
R34 2.59741 0.00034 0.00000 0.00071 0.00071 2.59812
R35 2.04196 0.00010 0.00000 0.00027 0.00027 2.04224
R36 2.67019 0.00007 0.00000 0.00018 0.00018 2.67037
R37 2.04833 0.00033 0.00000 0.00093 0.00093 2.04926
R38 2.04764 0.00025 0.00000 0.00069 0.00069 2.04833
R39 2.59852 0.00019 0.00000 0.00040 0.00040 2.59892
R40 2.04841 0.00026 0.00000 0.00074 0.00074 2.04916
R41 2.04354 0.00001 0.00000 0.00002 0.00002 2.04356
R42 2.63118 -0.00007 0.00000 -0.00014 -0.00014 2.63103
R43 2.63716 0.00015 0.00000 0.00035 0.00035 2.63751
R44 2.04763 0.00007 0.00000 0.00020 0.00020 2.04783
R45 2.63399 -0.00009 0.00000 -0.00023 -0.00023 2.63376
R46 2.04753 -0.00020 0.00000 -0.00056 -0.00056 2.04697
R47 2.81350 -0.00017 0.00000 -0.00050 -0.00050 2.81300
R48 2.63845 -0.00051 0.00000 -0.00083 -0.00083 2.63762
R49 2.63654 0.00026 0.00000 0.00085 0.00085 2.63738
R50 2.66052 0.00075 0.00000 0.00176 0.00177 2.66229
R51 2.56210 0.00137 0.00000 0.00255 0.00255 2.56465
R52 2.82896 -0.00038 0.00000 -0.00115 -0.00115 2.82781
R53 2.06360 -0.00019 0.00000 -0.00055 -0.00055 2.06305
R54 2.06266 -0.00017 0.00000 -0.00048 -0.00048 2.06217
R55 2.06166 -0.00006 0.00000 -0.00018 -0.00018 2.06148
R56 2.65498 0.00092 0.00000 0.00213 0.00213 2.65711
R57 2.55637 0.00114 0.00000 0.00213 0.00213 2.55850
R58 2.81733 0.00068 0.00000 0.00203 0.00203 2.81936
R59 2.06205 0.00001 0.00000 0.00004 0.00004 2.06208
R60 2.06385 0.00005 0.00000 0.00015 0.00015 2.06400
R61 2.05228 0.00016 0.00000 0.00046 0.00046 2.05274
R62 2.82923 -0.00048 0.00000 -0.00146 -0.00146 2.82777
R63 2.06171 -0.00013 0.00000 -0.00038 -0.00038 2.06133
R64 2.06265 -0.00015 0.00000 -0.00044 -0.00044 2.06222
R65 2.06376 -0.00022 0.00000 -0.00064 -0.00064 2.06312
R66 2.63405 -0.00004 0.00000 -0.00011 -0.00011 2.63394
R67 2.04753 -0.00025 0.00000 -0.00071 -0.00071 2.04682
R68 2.63140 -0.00002 0.00000 -0.00004 -0.00004 2.63136
R69 2.04758 -0.00013 0.00000 -0.00037 -0.00037 2.04721
R70 2.63776 0.00012 0.00000 0.00029 0.00029 2.63805
R71 2.04750 0.00014 0.00000 0.00039 0.00039 2.04789
R72 2.81221 0.00041 0.00000 0.00122 0.00122 2.81342
R73 2.06354 0.00013 0.00000 0.00037 0.00037 2.06390
R74 2.06035 0.00020 0.00000 0.00057 0.00057 2.06091
R75 2.06002 0.00002 0.00000 0.00004 0.00004 2.06006
R76 2.70041 -0.00049 0.00000 -0.00117 -0.00117 2.69924
R77 2.70147 -0.00096 0.00000 -0.00233 -0.00233 2.69915
R78 2.62087 0.00122 0.00000 0.00253 0.00252 2.62340
R79 2.66267 -0.00150 0.00000 -0.00342 -0.00342 2.65925
R80 2.04040 0.00002 0.00000 0.00007 0.00007 2.04046
R81 2.65899 -0.00117 0.00000 -0.00269 -0.00270 2.65629
R82 2.62538 0.00080 0.00000 0.00162 0.00162 2.62700
R83 2.04027 -0.00002 0.00000 -0.00004 -0.00004 2.04022
A1 2.10417 -0.00023 0.00000 -0.00109 -0.00109 2.10308
A2 2.16084 0.00053 0.00000 0.00265 0.00264 2.16348
A3 2.01734 -0.00030 0.00000 -0.00166 -0.00166 2.01568
A4 2.11055 0.00011 0.00000 0.00088 0.00087 2.11142
A5 2.06213 -0.00020 0.00000 -0.00087 -0.00087 2.06127
A6 2.11048 0.00009 0.00000 0.00002 0.00002 2.11050
A7 2.09163 -0.00023 0.00000 -0.00069 -0.00069 2.09094
A8 2.12369 0.00022 0.00000 0.00052 0.00052 2.12421
A9 2.06562 0.00001 0.00000 0.00005 0.00006 2.06568
A10 2.10265 0.00017 0.00000 0.00063 0.00063 2.10328
A11 2.12455 -0.00013 0.00000 -0.00032 -0.00032 2.12423
A12 2.05595 -0.00004 0.00000 -0.00027 -0.00028 2.05567
A13 2.11390 0.00023 0.00000 0.00102 0.00102 2.11492
A14 2.04868 -0.00024 0.00000 -0.00132 -0.00132 2.04735
A15 2.12052 0.00001 0.00000 0.00024 0.00024 2.12076
A16 2.10039 -0.00008 0.00000 -0.00063 -0.00063 2.09976
A17 2.10257 -0.00009 0.00000 -0.00059 -0.00059 2.10197
A18 2.07957 0.00017 0.00000 0.00104 0.00104 2.08060
A19 2.07444 0.00002 0.00000 -0.00014 -0.00014 2.07429
A20 2.11994 0.00007 0.00000 0.00047 0.00046 2.12041
A21 2.08872 -0.00009 0.00000 -0.00036 -0.00036 2.08836
A22 2.09507 0.00025 0.00000 0.00097 0.00097 2.09604
A23 2.13400 -0.00013 0.00000 -0.00045 -0.00046 2.13354
A24 2.05360 -0.00012 0.00000 -0.00062 -0.00062 2.05298
A25 2.08507 -0.00007 0.00000 -0.00021 -0.00022 2.08486
A26 2.14349 0.00017 0.00000 0.00059 0.00059 2.14408
A27 2.05320 -0.00011 0.00000 -0.00060 -0.00060 2.05260
A28 2.08270 0.00012 0.00000 0.00042 0.00042 2.08312
A29 2.08716 -0.00001 0.00000 -0.00013 -0.00013 2.08703
A30 2.11293 -0.00011 0.00000 -0.00037 -0.00038 2.11255
A31 2.10163 0.00001 0.00000 -0.00015 -0.00015 2.10148
A32 2.07681 0.00016 0.00000 0.00107 0.00106 2.07787
A33 2.10417 -0.00018 0.00000 -0.00105 -0.00105 2.10311
A34 2.11252 0.00023 0.00000 0.00099 0.00099 2.11351
A35 2.06634 -0.00025 0.00000 -0.00136 -0.00137 2.06498
A36 2.10420 0.00002 0.00000 0.00030 0.00029 2.10449
A37 2.11213 0.00023 0.00000 0.00102 0.00102 2.11314
A38 2.06705 -0.00028 0.00000 -0.00153 -0.00154 2.06551
A39 2.10392 0.00004 0.00000 0.00045 0.00045 2.10437
A40 2.08694 -0.00014 0.00000 -0.00057 -0.00057 2.08636
A41 2.10205 0.00003 0.00000 -0.00002 -0.00002 2.10203
A42 2.09409 0.00011 0.00000 0.00051 0.00051 2.09460
A43 1.98595 -0.00122 0.00000 -0.00919 -0.00918 1.97677
A44 1.85238 0.00035 0.00000 0.00183 0.00183 1.85422
A45 1.97522 0.00011 0.00000 0.00014 0.00013 1.97535
A46 1.96778 0.00034 0.00000 0.00339 0.00338 1.97116
A47 1.81431 0.00043 0.00000 0.00239 0.00238 1.81669
A48 1.86748 0.00006 0.00000 0.00210 0.00210 1.86958
A49 2.18230 0.00053 0.00000 0.00430 0.00430 2.18660
A50 2.04231 0.00096 0.00000 0.00553 0.00553 2.04784
A51 2.10027 0.00004 0.00000 0.00016 0.00016 2.10043
A52 2.05883 -0.00006 0.00000 -0.00031 -0.00032 2.05851
A53 2.12408 0.00001 0.00000 0.00014 0.00013 2.12421
A54 2.11732 0.00017 0.00000 0.00084 0.00084 2.11816
A55 2.07975 -0.00026 0.00000 -0.00150 -0.00151 2.07824
A56 2.08606 0.00008 0.00000 0.00060 0.00059 2.08665
A57 2.10711 -0.00011 0.00000 -0.00037 -0.00037 2.10674
A58 2.08805 0.00000 0.00000 -0.00015 -0.00016 2.08789
A59 2.08801 0.00010 0.00000 0.00047 0.00046 2.08847
A60 2.08732 -0.00017 0.00000 -0.00073 -0.00073 2.08659
A61 2.10203 -0.00003 0.00000 -0.00044 -0.00044 2.10158
A62 2.09366 0.00020 0.00000 0.00106 0.00105 2.09471
A63 2.10664 -0.00014 0.00000 -0.00058 -0.00058 2.10605
A64 2.08834 0.00019 0.00000 0.00105 0.00104 2.08938
A65 2.08820 -0.00005 0.00000 -0.00049 -0.00050 2.08769
A66 2.11737 0.00026 0.00000 0.00112 0.00112 2.11849
A67 2.07853 -0.00034 0.00000 -0.00192 -0.00193 2.07660
A68 2.08722 0.00008 0.00000 0.00075 0.00074 2.08796
A69 2.09630 -0.00024 0.00000 -0.00098 -0.00098 2.09532
A70 2.10053 -0.00010 0.00000 -0.00089 -0.00089 2.09964
A71 2.08635 0.00034 0.00000 0.00188 0.00188 2.08822
A72 2.09618 0.00005 0.00000 0.00016 0.00016 2.09634
A73 2.09011 0.00008 0.00000 0.00058 0.00058 2.09069
A74 2.09690 -0.00013 0.00000 -0.00074 -0.00074 2.09616
A75 2.08184 0.00044 0.00000 0.00149 0.00148 2.08333
A76 2.08152 0.00039 0.00000 0.00126 0.00126 2.08278
A77 2.11979 -0.00083 0.00000 -0.00278 -0.00278 2.11701
A78 2.14435 -0.00011 0.00000 -0.00121 -0.00121 2.14313
A79 2.24889 0.00079 0.00000 0.00404 0.00402 2.25291
A80 1.88377 -0.00067 0.00000 -0.00194 -0.00195 1.88182
A81 1.95134 -0.00014 0.00000 -0.00128 -0.00128 1.95006
A82 1.95164 -0.00008 0.00000 -0.00066 -0.00067 1.95098
A83 1.91279 0.00017 0.00000 0.00169 0.00169 1.91448
A84 1.86199 -0.00007 0.00000 -0.00154 -0.00155 1.86044
A85 1.89081 0.00003 0.00000 0.00051 0.00051 1.89133
A86 1.89305 0.00008 0.00000 0.00131 0.00131 1.89437
A87 2.15843 0.00006 0.00000 -0.00082 -0.00081 2.15761
A88 2.21690 0.00073 0.00000 0.00368 0.00367 2.22057
A89 1.88601 -0.00078 0.00000 -0.00248 -0.00248 1.88353
A90 1.89873 -0.00018 0.00000 -0.00181 -0.00181 1.89692
A91 1.93749 0.00028 0.00000 0.00236 0.00236 1.93985
A92 1.95394 0.00012 0.00000 0.00082 0.00081 1.95475
A93 1.87597 -0.00007 0.00000 -0.00063 -0.00063 1.87535
A94 1.91253 -0.00015 0.00000 -0.00209 -0.00209 1.91044
A95 1.88354 -0.00000 0.00000 0.00125 0.00125 1.88479
A96 1.91292 0.00019 0.00000 0.00176 0.00176 1.91468
A97 1.95393 -0.00013 0.00000 -0.00100 -0.00100 1.95293
A98 1.94940 -0.00015 0.00000 -0.00134 -0.00134 1.94806
A99 1.89351 0.00008 0.00000 0.00124 0.00124 1.89475
A100 1.88945 0.00004 0.00000 0.00059 0.00059 1.89004
A101 1.86237 -0.00002 0.00000 -0.00121 -0.00121 1.86117
A102 2.09213 0.00011 0.00000 0.00038 0.00038 2.09251
A103 2.09551 -0.00009 0.00000 -0.00044 -0.00044 2.09507
A104 2.09554 -0.00001 0.00000 0.00006 0.00006 2.09560
A105 2.09582 0.00006 0.00000 0.00026 0.00026 2.09608
A106 2.09705 -0.00017 0.00000 -0.00101 -0.00101 2.09605
A107 2.09031 0.00011 0.00000 0.00075 0.00075 2.09106
A108 2.09642 -0.00028 0.00000 -0.00114 -0.00114 2.09528
A109 2.10103 -0.00003 0.00000 -0.00048 -0.00048 2.10056
A110 2.08573 0.00031 0.00000 0.00162 0.00162 2.08735
A111 2.10124 -0.00022 0.00000 -0.00095 -0.00095 2.10029
A112 2.08952 0.00029 0.00000 0.00132 0.00132 2.09084
A113 2.09243 -0.00007 0.00000 -0.00037 -0.00037 2.09206
A114 1.94744 0.00006 0.00000 0.00075 0.00074 1.94818
A115 1.94162 0.00012 0.00000 0.00115 0.00115 1.94276
A116 1.90948 -0.00017 0.00000 -0.00182 -0.00182 1.90766
A117 1.87341 0.00016 0.00000 0.00243 0.00243 1.87584
A118 1.88513 -0.00008 0.00000 -0.00132 -0.00132 1.88381
A119 1.90534 -0.00009 0.00000 -0.00123 -0.00123 1.90411
A120 2.10887 0.00040 0.00000 0.00159 0.00159 2.11046
A121 2.28512 -0.00068 0.00000 -0.00273 -0.00273 2.28239
A122 1.88807 0.00028 0.00000 0.00121 0.00121 1.88928
A123 2.10984 0.00040 0.00000 0.00159 0.00159 2.11143
A124 2.27728 -0.00072 0.00000 -0.00301 -0.00302 2.27427
A125 1.88963 0.00031 0.00000 0.00100 0.00101 1.89063
A126 2.25801 -0.00027 0.00000 -0.00101 -0.00101 2.25700
A127 2.17655 0.00029 0.00000 0.00122 0.00122 2.17777
A128 1.84835 -0.00003 0.00000 -0.00031 -0.00031 1.84804
A129 1.90043 0.00011 0.00000 0.00020 0.00020 1.90063
A130 2.20649 -0.00025 0.00000 -0.00135 -0.00136 2.20513
A131 2.17614 0.00014 0.00000 0.00107 0.00107 2.17720
A132 2.21204 0.00013 0.00000 0.00058 0.00058 2.21262
A133 1.90231 0.00029 0.00000 0.00097 0.00097 1.90328
A134 2.16882 -0.00041 0.00000 -0.00157 -0.00158 2.16724
A135 2.18149 0.00001 0.00000 0.00015 0.00015 2.18164
A136 1.90465 0.00044 0.00000 0.00159 0.00160 1.90625
A137 2.19661 -0.00045 0.00000 -0.00170 -0.00170 2.19492
A138 1.89640 0.00011 0.00000 0.00013 0.00013 1.89652
A139 2.17982 0.00015 0.00000 0.00121 0.00121 2.18102
A140 2.20690 -0.00026 0.00000 -0.00131 -0.00131 2.20559
A141 2.25769 -0.00024 0.00000 -0.00082 -0.00082 2.25688
A142 2.17656 0.00028 0.00000 0.00125 0.00125 2.17782
A143 1.84893 -0.00005 0.00000 -0.00043 -0.00044 1.84849
D1 2.93952 0.00010 0.00000 -0.00022 -0.00022 2.93930
D2 -0.19591 -0.00003 0.00000 -0.00497 -0.00497 -0.20089
D3 -0.15607 0.00012 0.00000 0.00255 0.00255 -0.15352
D4 2.99168 -0.00002 0.00000 -0.00220 -0.00220 2.98948
D5 0.09881 0.00004 0.00000 0.00436 0.00436 0.10317
D6 -3.05690 -0.00004 0.00000 -0.00024 -0.00023 -3.05714
D7 -3.08516 0.00005 0.00000 0.00191 0.00192 -3.08324
D8 0.04232 -0.00004 0.00000 -0.00268 -0.00267 0.03964
D9 -0.81724 0.00041 0.00000 0.00007 0.00007 -0.81717
D10 2.36827 0.00042 0.00000 0.00271 0.00271 2.37098
D11 0.87319 -0.00013 0.00000 -0.00706 -0.00707 0.86611
D12 -2.19519 -0.00007 0.00000 -0.00529 -0.00530 -2.20049
D13 -2.27474 0.00001 0.00000 -0.00218 -0.00219 -2.27693
D14 0.94007 0.00007 0.00000 -0.00041 -0.00042 0.93966
D15 0.16046 0.00003 0.00000 0.00263 0.00263 0.16309
D16 -2.94584 0.00010 0.00000 0.00634 0.00634 -2.93951
D17 -2.97498 -0.00011 0.00000 -0.00212 -0.00212 -2.97710
D18 0.20191 -0.00003 0.00000 0.00158 0.00159 0.20349
D19 -0.05291 0.00010 0.00000 0.00474 0.00474 -0.04817
D20 3.09776 0.00005 0.00000 0.00007 0.00007 3.09784
D21 3.01789 0.00006 0.00000 0.00305 0.00305 3.02093
D22 -0.11463 -0.00000 0.00000 -0.00162 -0.00162 -0.11625
D23 -3.10036 -0.00009 0.00000 -0.00193 -0.00193 -3.10229
D24 0.09991 0.00001 0.00000 0.00269 0.00269 0.10260
D25 0.11340 -0.00002 0.00000 -0.00016 -0.00015 0.11325
D26 -2.96952 0.00008 0.00000 0.00446 0.00447 -2.96505
D27 -1.20391 0.00012 0.00000 -0.00545 -0.00545 -1.20936
D28 1.92895 0.00018 0.00000 -0.00096 -0.00096 1.92799
D29 0.03668 0.00002 0.00000 0.00245 0.00245 0.03912
D30 -3.10895 -0.00007 0.00000 -0.00203 -0.00203 -3.11099
D31 -3.09607 -0.00004 0.00000 -0.00211 -0.00210 -3.09818
D32 0.04149 -0.00013 0.00000 -0.00659 -0.00658 0.03490
D33 0.04069 -0.00002 0.00000 -0.00099 -0.00099 0.03970
D34 -3.14030 -0.00013 0.00000 -0.00617 -0.00617 3.13671
D35 -3.08620 0.00008 0.00000 0.00381 0.00381 -3.08239
D36 0.01599 -0.00004 0.00000 -0.00138 -0.00137 0.01462
D37 -0.07381 -0.00004 0.00000 -0.00151 -0.00151 -0.07532
D38 3.05371 -0.00011 0.00000 -0.00442 -0.00442 3.04929
D39 3.10667 0.00008 0.00000 0.00364 0.00364 3.11031
D40 -0.04900 0.00002 0.00000 0.00073 0.00073 -0.04827
D41 -0.02742 -0.00000 0.00000 0.00061 0.00061 -0.02681
D42 3.08048 -0.00008 0.00000 -0.00292 -0.00292 3.07756
D43 3.12799 0.00006 0.00000 0.00346 0.00346 3.13145
D44 -0.04730 -0.00001 0.00000 -0.00008 -0.00007 -0.04737
D45 -3.09913 0.00008 0.00000 0.00293 0.00293 -3.09621
D46 0.02822 -0.00003 0.00000 -0.00203 -0.00203 0.02619
D47 0.02827 0.00001 0.00000 -0.00000 -0.00000 0.02827
D48 -3.12756 -0.00010 0.00000 -0.00496 -0.00496 -3.13252
D49 3.13851 -0.00006 0.00000 -0.00335 -0.00335 3.13516
D50 0.00987 0.00004 0.00000 0.00159 0.00159 0.01146
D51 0.03141 0.00001 0.00000 0.00024 0.00024 0.03165
D52 -3.09723 0.00011 0.00000 0.00518 0.00517 -3.09205
D53 -0.03711 0.00001 0.00000 0.00108 0.00108 -0.03603
D54 3.13435 0.00008 0.00000 0.00435 0.00434 3.13869
D55 3.04882 -0.00007 0.00000 -0.00326 -0.00326 3.04556
D56 -0.06291 -0.00000 0.00000 0.00000 0.00000 -0.06290
D57 3.12984 -0.00009 0.00000 -0.00423 -0.00424 3.12560
D58 0.00019 0.00004 0.00000 0.00174 0.00174 0.00193
D59 0.04591 0.00001 0.00000 0.00029 0.00029 0.04620
D60 -3.08374 0.00013 0.00000 0.00627 0.00627 -3.07747
D61 -0.04219 -0.00000 0.00000 -0.00029 -0.00029 -0.04249
D62 3.13579 0.00009 0.00000 0.00396 0.00396 3.13975
D63 3.06908 -0.00007 0.00000 -0.00360 -0.00360 3.06548
D64 -0.03612 0.00002 0.00000 0.00065 0.00065 -0.03547
D65 0.03459 0.00000 0.00000 -0.00008 -0.00009 0.03450
D66 -3.12368 -0.00011 0.00000 -0.00534 -0.00534 -3.12902
D67 -3.07661 0.00007 0.00000 0.00322 0.00322 -3.07339
D68 0.04831 -0.00004 0.00000 -0.00204 -0.00204 0.04627
D69 0.04407 -0.00003 0.00000 -0.00147 -0.00147 0.04260
D70 -3.09333 0.00006 0.00000 0.00318 0.00318 -3.09015
D71 -3.13449 -0.00012 0.00000 -0.00574 -0.00574 -3.14023
D72 0.01129 -0.00003 0.00000 -0.00109 -0.00109 0.01020
D73 0.01311 -0.00000 0.00000 -0.00006 -0.00006 0.01305
D74 3.13461 -0.00013 0.00000 -0.00614 -0.00614 3.12847
D75 -3.11144 0.00012 0.00000 0.00533 0.00533 -3.10611
D76 0.01005 -0.00002 0.00000 -0.00075 -0.00075 0.00931
D77 0.00838 -0.00000 0.00000 -0.00002 -0.00002 0.00836
D78 3.13457 -0.00013 0.00000 -0.00583 -0.00583 3.12873
D79 -3.11867 0.00012 0.00000 0.00506 0.00506 -3.11362
D80 0.00751 -0.00001 0.00000 -0.00075 -0.00075 0.00676
D81 -0.02517 -0.00000 0.00000 0.00017 0.00017 -0.02500
D82 3.11039 -0.00013 0.00000 -0.00584 -0.00584 3.10454
D83 3.13176 0.00013 0.00000 0.00596 0.00596 3.13772
D84 -0.01587 0.00000 0.00000 -0.00005 -0.00005 -0.01593
D85 0.35106 0.00014 0.00000 -0.00005 -0.00004 0.35102
D86 2.52516 0.00003 0.00000 -0.00040 -0.00040 2.52476
D87 -1.71502 0.00038 0.00000 0.00338 0.00338 -1.71164
D88 0.99619 0.00011 0.00000 0.00188 0.00188 0.99807
D89 -1.11454 0.00031 0.00000 0.00377 0.00379 -1.11076
D90 -3.13072 -0.00017 0.00000 -0.00172 -0.00172 -3.13244
D91 2.47607 0.00042 0.00000 0.00084 0.00084 2.47691
D92 -0.79969 0.00049 0.00000 0.01026 0.01027 -0.78942
D93 -1.62181 -0.00065 0.00000 -0.00726 -0.00727 -1.62908
D94 1.38561 -0.00058 0.00000 0.00216 0.00217 1.38777
D95 0.36220 0.00007 0.00000 -0.00140 -0.00139 0.36082
D96 -2.91356 0.00014 0.00000 0.00803 0.00805 -2.90552
D97 -2.34261 -0.00059 0.00000 -0.00238 -0.00237 -2.34499
D98 1.04921 -0.00052 0.00000 -0.00416 -0.00416 1.04505
D99 1.77731 0.00056 0.00000 0.00728 0.00728 1.78459
D100 -1.11404 0.00063 0.00000 0.00549 0.00549 -1.10855
D101 -0.30850 -0.00007 0.00000 0.00127 0.00126 -0.30723
D102 3.08333 0.00001 0.00000 -0.00052 -0.00053 3.08281
D103 0.00082 -0.00001 0.00000 -0.00046 -0.00046 0.00036
D104 -3.13357 0.00014 0.00000 0.00621 0.00621 -3.12736
D105 3.13042 -0.00014 0.00000 -0.00647 -0.00648 3.12394
D106 -0.00397 0.00001 0.00000 0.00020 0.00019 -0.00377
D107 -0.03134 0.00001 0.00000 0.00034 0.00034 -0.03100
D108 3.13025 0.00014 0.00000 0.00641 0.00641 3.13666
D109 3.10304 -0.00014 0.00000 -0.00633 -0.00633 3.09671
D110 -0.01855 -0.00000 0.00000 -0.00026 -0.00026 -0.01881
D111 0.00458 -0.00000 0.00000 -0.00028 -0.00027 0.00431
D112 3.13315 -0.00011 0.00000 -0.00526 -0.00526 3.12789
D113 -3.13097 0.00012 0.00000 0.00573 0.00573 -3.12524
D114 -0.00240 0.00002 0.00000 0.00074 0.00074 -0.00166
D115 -0.00306 -0.00001 0.00000 -0.00040 -0.00040 -0.00346
D116 3.13925 0.00001 0.00000 0.00063 0.00063 3.13988
D117 3.14121 -0.00002 0.00000 -0.00094 -0.00094 3.14027
D118 0.00034 0.00000 0.00000 0.00009 0.00009 0.00042
D119 -3.13895 -0.00000 0.00000 -0.00011 -0.00011 -3.13906
D120 0.00127 0.00000 0.00000 0.00004 0.00004 0.00131
D121 -0.00001 0.00001 0.00000 0.00042 0.00042 0.00041
D122 3.14020 0.00001 0.00000 0.00058 0.00058 3.14078
D123 0.00162 0.00001 0.00000 0.00028 0.00028 0.00189
D124 -3.13976 0.00002 0.00000 0.00107 0.00107 -3.13869
D125 -3.14069 -0.00002 0.00000 -0.00076 -0.00076 -3.14145
D126 0.00111 0.00000 0.00000 0.00004 0.00004 0.00115
D127 -1.49806 0.00009 0.00000 0.00574 0.00574 -1.49232
D128 1.64491 0.00009 0.00000 0.00559 0.00559 1.65050
D129 1.63495 -0.00003 0.00000 0.00143 0.00143 1.63638
D130 -1.50527 -0.00003 0.00000 0.00128 0.00128 -1.50399
D131 -3.10148 -0.00005 0.00000 -0.00427 -0.00426 -3.10574
D132 -0.01735 -0.00000 0.00000 -0.00244 -0.00244 -0.01979
D133 0.04889 0.00006 0.00000 0.00012 0.00012 0.04900
D134 3.13301 0.00012 0.00000 0.00194 0.00194 3.13495
D135 -3.12545 0.00011 0.00000 0.00433 0.00433 -3.12113
D136 -0.12067 0.00000 0.00000 0.00002 0.00002 -0.12064
D137 0.00737 -0.00001 0.00000 -0.00006 -0.00005 0.00732
D138 3.01215 -0.00011 0.00000 -0.00437 -0.00435 3.00780
D139 -0.24266 -0.00006 0.00000 0.00112 0.00111 -0.24155
D140 3.00840 0.00011 0.00000 0.00488 0.00487 3.01326
D141 3.00865 -0.00021 0.00000 -0.00700 -0.00699 3.00166
D142 -0.02348 -0.00005 0.00000 -0.00324 -0.00323 -0.02671
D143 0.14440 0.00002 0.00000 -0.00159 -0.00160 0.14280
D144 -3.00402 -0.00003 0.00000 -0.00493 -0.00495 -3.00897
D145 -3.11557 0.00010 0.00000 0.00669 0.00669 -3.10888
D146 0.01920 0.00006 0.00000 0.00335 0.00334 0.02254
D147 -1.06528 0.00014 0.00000 0.00404 0.00404 -1.06125
D148 2.04744 0.00006 0.00000 -0.00124 -0.00124 2.04620
D149 1.02134 -0.00010 0.00000 0.00073 0.00073 1.02207
D150 -2.14912 -0.00018 0.00000 -0.00455 -0.00455 -2.15367
D151 3.12112 0.00007 0.00000 0.00309 0.00309 3.12421
D152 -0.04934 -0.00000 0.00000 -0.00220 -0.00219 -0.05153
D153 0.13106 -0.00005 0.00000 -0.00111 -0.00111 0.12995
D154 -2.96484 -0.00006 0.00000 -0.00244 -0.00244 -2.96728
D155 3.06316 0.00006 0.00000 0.00113 0.00113 3.06429
D156 -0.03274 0.00005 0.00000 -0.00019 -0.00019 -0.03293
D157 -0.15199 -0.00005 0.00000 -0.00066 -0.00066 -0.15265
D158 2.95968 -0.00005 0.00000 0.00102 0.00102 2.96070
D159 -3.07507 -0.00005 0.00000 -0.00227 -0.00227 -3.07734
D160 0.03659 -0.00005 0.00000 -0.00059 -0.00059 0.03600
D161 2.68232 -0.00008 0.00000 -0.00179 -0.00179 2.68053
D162 -0.45146 -0.00003 0.00000 0.00202 0.00203 -0.44944
D163 -1.54005 -0.00012 0.00000 -0.00228 -0.00228 -1.54233
D164 1.60935 -0.00007 0.00000 0.00154 0.00154 1.61089
D165 0.56609 0.00016 0.00000 0.00153 0.00153 0.56762
D166 -2.56769 0.00021 0.00000 0.00534 0.00535 -2.56234
D167 -3.07383 -0.00003 0.00000 0.00012 0.00012 -3.07371
D168 0.06578 -0.00001 0.00000 0.00036 0.00036 0.06614
D169 -0.97191 0.00012 0.00000 0.00222 0.00222 -0.96968
D170 2.16770 0.00014 0.00000 0.00247 0.00247 2.17016
D171 1.11545 -0.00011 0.00000 -0.00093 -0.00093 1.11452
D172 -2.02813 -0.00008 0.00000 -0.00068 -0.00068 -2.02881
D173 0.00161 0.00001 0.00000 0.00022 0.00022 0.00183
D174 -3.14138 0.00002 0.00000 0.00087 0.00087 -3.14052
D175 -3.14019 -0.00001 0.00000 -0.00058 -0.00058 -3.14077
D176 -0.00000 0.00000 0.00000 0.00007 0.00007 0.00007
D177 -0.00341 -0.00001 0.00000 -0.00057 -0.00057 -0.00398
D178 3.13882 0.00001 0.00000 0.00052 0.00052 3.13935
D179 3.13959 -0.00003 0.00000 -0.00122 -0.00122 3.13837
D180 -0.00137 -0.00000 0.00000 -0.00012 -0.00012 -0.00149
D181 0.00196 0.00001 0.00000 0.00044 0.00044 0.00240
[truncated: 25,549 more rows]

## Sheet: bodipy-ex-parallel-positive
Entering Gaussian System, Link 0=g09
Input=bodipy-ex-parallel-positive.gjf
Output=bodipy-ex-parallel-positive.log
Initial command:
/public/apps/gs/g09/l1.exe "/tmp/jianghao/scratch/14021.master/Gau-362661.inp" -scrdir="/tmp/jianghao/scratch/14021.master/"
Entering Link 1 = /public/apps/gs/g09/l1.exe PID= 362662.
Copyright (c) 1988,1990,1992,1993,1995,1998,2003,2009,2015,
Gaussian, Inc. All Rights Reserved.
This is part of the Gaussian(R) 09 program. It is based on
the Gaussian(R) 03 system (copyright 2003, Gaussian, Inc.),
the Gaussian(R) 98 system (copyright 1998, Gaussian, Inc.),
the Gaussian(R) 94 system (copyright 1995, Gaussian, Inc.),
the Gaussian 92(TM) system (copyright 1992, Gaussian, Inc.),
the Gaussian 90(TM) system (copyright 1990, Gaussian, Inc.),
the Gaussian 88(TM) system (copyright 1988, Gaussian, Inc.),
the Gaussian 86(TM) system (copyright 1986, Carnegie Mellon
University), and the Gaussian 82(TM) system (copyright 1983,
Carnegie Mellon University). Gaussian is a federally registered
trademark of Gaussian, Inc.
This software contains proprietary and confidential information,
including trade secrets, belonging to Gaussian, Inc.
This software is provided under written license and may be
used, copied, transmitted, or stored only in accord with that
written license.
The following legend is applicable only to US Government
contracts under FAR:
RESTRICTED RIGHTS LEGEND
Use, reproduction and disclosure by the US Government is
subject to restrictions as set forth in subparagraphs (a)
and (c) of the Commercial Computer Software - Restricted
Rights clause in FAR 52.227-19.
Gaussian, Inc.
340 Quinnipiac St., Bldg. 40, Wallingford CT 06492
---------------------------------------------------------------
Warning -- This program may not be used in any manner that
competes with the business of Gaussian, Inc. or will provide
assistance to any competitor of Gaussian, Inc. The licensee
of this program is prohibited from giving any competitor of
Gaussian, Inc. access to this program. By using this program,
the user acknowledges that Gaussian, Inc. is engaged in the
business of creating and licensing software in the field of
computational chemistry and represents and warrants to the
licensee that it is not a competitor of Gaussian, Inc. and that
it will not use this program in any manner prohibited above.
---------------------------------------------------------------
Cite this work as:
Gaussian 09, Revision E.01,
M. J. Frisch, G. W. Trucks, H. B. Schlegel, G. E. Scuseria,
M. A. Robb, J. R. Cheeseman, G. Scalmani, V. Barone, B. Mennucci,
G. A. Petersson, H. Nakatsuji, M. Caricato, X. Li, H. P. Hratchian,
A. F. Izmaylov, J. Bloino, G. Zheng, J. L. Sonnenberg, M. Hada,
M. Ehara, K. Toyota, R. Fukuda, J. Hasegawa, M. Ishida, T. Nakajima,
Y. Honda, O. Kitao, H. Nakai, T. Vreven, J. A. Montgomery, Jr.,
J. E. Peralta, F. Ogliaro, M. Bearpark, J. J. Heyd, E. Brothers,
K. N. Kudin, V. N. Staroverov, T. Keith, R. Kobayashi, J. Normand,
K. Raghavachari, A. Rendell, J. C. Burant, S. S. Iyengar, J. Tomasi,
M. Cossi, N. Rega, J. M. Millam, M. Klene, J. E. Knox, J. B. Cross,
V. Bakken, C. Adamo, J. Jaramillo, R. Gomperts, R. E. Stratmann,
O. Yazyev, A. J. Austin, R. Cammi, C. Pomelli, J. W. Ochterski,
R. L. Martin, K. Morokuma, V. G. Zakrzewski, G. A. Voth,
P. Salvador, J. J. Dannenberg, S. Dapprich, A. D. Daniels,
O. Farkas, J. B. Foresman, J. V. Ortiz, J. Cioslowski,
and D. J. Fox, Gaussian, Inc., Wallingford CT, 2013.
******************************************
Gaussian 09: ES64L-G09RevE.01 30-Nov-2015
27-May-2023
******************************************
%nprocshared=32
Will use up to 32 processors via shared memory.
%chk=bodipy-ex-parallel-positive.chk
%mem=32GB
----------------------------------------------------------------------
#p opt freq b3lyp/6-311g(d,p) empiricaldispersion=gd3bj scrf=(solvent=
water,pcm) nosymm field=x+20
----------------------------------------------------------------------
1/14=-1,18=20,19=15,26=3,38=1/1,3;
2/9=110,12=2,15=1,17=6,18=5,40=1/2;
3/5=4,6=6,7=101,11=2,14=1,15=20,16=1,25=1,30=1,70=2201,71=1,72=1,74=-5,124=41/1,2,3;
4//1;
5/5=2,38=5,53=1/2;
6/7=2,8=2,9=2,10=2,28=1/1;
7/30=1/1,2,3,16;
1/14=-1,18=20,19=15,26=3/3(2);
2/9=110,15=1/2;
99//99;
2/9=110,15=1/2;
3/5=4,6=6,7=101,11=2,14=1,15=20,16=1,25=1,30=1,70=2205,71=1,72=1,74=-5,124=41/1,2,3;
4/5=5,16=3,69=1/1;
5/5=2,38=5,53=1/2;
7/30=1/1,2,3,16;
1/14=-1,18=20,19=15,26=3/3(-5);
2/9=110,15=1/2;
6/7=2,8=2,9=2,10=2,19=2,28=1/1;
99/9=1/99;
Leave Link 1 at Sat May 27 23:28:50 2023, MaxMem= 4294967296 cpu: 3.1
(Enter /public/apps/gs/g09/l101.exe)
-
T
-
Symbolic Z-matrix:
Charge = 0 Multiplicity = 1
C -1.79458 1.23166 -1.1179
C -2.68356 0.65063 -0.21938
C -2.36693 -0.64112 0.43959
C -1.14209 -0.81514 1.06229
C -2.19713 2.3273 -1.92463
C -3.42152 2.91202 -1.7617
C -4.30035 2.46285 -0.74263
C -3.92092 1.33227 0.04733
C -3.2648 -1.75977 0.37654
C -2.93541 -2.96782 1.0724
C -1.70534 -3.0522 1.77432
C -3.8251 -4.07181 1.01908
C -5.53008 3.11912 -0.48371
C -6.35125 2.70678 0.53776
B 0.42074 0.43826 -0.27442
O -0.53468 0.78289 -1.32779
O -0.20234 0.16687 1.02208
C -0.81891 -2.00957 1.74688
C -4.44935 -1.75336 -0.40909
C -5.28034 -2.84713 -0.45752
C -4.97927 -4.01572 0.27756
C -5.96122 1.61885 1.3498
C -4.7836 0.95058 1.11006
H -1.49127 2.68827 -2.66291
H -3.71883 3.74802 -2.38485
H -1.46402 -3.96714 2.30361
H -3.56468 -4.97099 1.56686
H -5.804 3.96611 -1.10352
H -7.2861 3.21928 0.7315
H 0.14447 -2.0685 2.23831
H -4.69297 -0.87356 -0.98721
H -6.17298 -2.81532 -1.07159
H -5.64859 -4.86695 0.23857
H -6.59418 1.31096 2.17416
H -4.4987 0.12509 1.74788
C 5.76486 0.27401 -0.88329
C 7.12889 0.08626 -0.67629
C 3.39187 0.13128 -0.09913
N 1.24623 -0.77822 -0.81631
C 4.37416 -2.86142 -1.04564
N 1.43909 1.5818 0.02937
C -0.58829 -2.17003 -1.90102
C 4.83344 2.88865 0.98672
C 7.58722 -0.4362 0.53192
C 6.67706 -0.77249 1.53263
C 5.3124 -0.5888 1.32536
C 4.85201 -0.0637 0.11677
C -0.21223 3.41628 0.5405
C 2.8211 1.37553 0.17561
C 2.626 -0.93053 -0.58139
C 3.02143 -2.22024 -1.05457
C 1.87682 -2.79871 -1.58253
C 0.80154 -1.90037 -1.43376
C 1.15459 2.83395 0.455
C 2.34833 3.47352 0.83682
C 3.40139 2.58171 0.67601
H 5.40415 0.6802 -1.82084
H 7.83243 0.34841 -1.45751
H 5.09794 -2.28958 -1.63012
H 4.77933 -2.93982 -0.03515
H 4.30647 -3.8644 -1.46953
H -0.54937 -2.8811 -2.72779
H -1.18743 -2.62187 -1.10751
H -1.09107 -1.26328 -2.2242
H 4.90837 3.88811 1.41772
H 5.2599 2.17417 1.69315
H 5.4571 2.85474 0.09085
H 8.64893 -0.58046 0.69299
H 7.02833 -1.17879 2.47368
H 4.60048 -0.85095 2.09893
H -0.59106 3.69805 -0.44414
H -0.91866 2.70494 0.96907
H -0.18598 4.31243 1.16064
H 1.80611 -3.76973 -2.04937
H 2.41615 4.48658 1.20394
NAtoms= 75 NQM= 75 NQMF= 0 NMMI= 0 NMMIF= 0
NMic= 0 NMicF= 0.
Isotopes and Nuclear Properties:
(Nuclear quadrupole moments (NQMom) in fm**2, nuclear magnetic moments (NMagM)
in nuclear magnetons)
Atom 1 2 3 4 5 6 7 8 9 10
IAtWgt= 12 12 12 12 12 12 12 12 12 12
AtmWgt= 12.0000000 12.0000000 12.0000000 12.0000000 12.0000000 12.0000000 12.0000000 12.0000000 12.0000000 12.0000000
NucSpn= 0 0 0 0 0 0 0 0 0 0
AtZEff= 0.0000000 0.0000000 0.0000000 0.0000000 0.0000000 0.0000000 0.0000000 0.0000000 0.0000000 0.0000000
NQMom= 0.0000000 0.0000000 0.0000000 0.0000000 0.0000000 0.0000000 0.0000000 0.0000000 0.0000000 0.0000000
NMagM= 0.0000000 0.0000000 0.0000000 0.0000000 0.0000000 0.0000000 0.0000000 0.0000000 0.0000000 0.0000000
AtZNuc= 6.0000000 6.0000000 6.0000000 6.0000000 6.0000000 6.0000000 6.0000000 6.0000000 6.0000000 6.0000000
Atom 11 12 13 14 15 16 17 18 19 20
IAtWgt= 12 12 12 12 11 16 16 12 12 12
AtmWgt= 12.0000000 12.0000000 12.0000000 12.0000000 11.0093053 15.9949146 15.9949146 12.0000000 12.0000000 12.0000000
NucSpn= 0 0 0 0 3 0 0 0 0 0
AtZEff= 0.0000000 0.0000000 0.0000000 0.0000000 0.0000000 0.0000000 0.0000000 0.0000000 0.0000000 0.0000000
NQMom= 0.0000000 0.0000000 0.0000000 0.0000000 4.0590000 0.0000000 0.0000000 0.0000000 0.0000000 0.0000000
NMagM= 0.0000000 0.0000000 0.0000000 0.0000000 2.6886370 0.0000000 0.0000000 0.0000000 0.0000000 0.0000000
AtZNuc= 6.0000000 6.0000000 6.0000000 6.0000000 5.0000000 8.0000000 8.0000000 6.0000000 6.0000000 6.0000000
Atom 21 22 23 24 25 26 27 28 29 30
IAtWgt= 12 12 12 1 1 1 1 1 1 1
AtmWgt= 12.0000000 12.0000000 12.0000000 1.0078250 1.0078250 1.0078250 1.0078250 1.0078250 1.0078250 1.0078250
NucSpn= 0 0 0 1 1 1 1 1 1 1
AtZEff= 0.0000000 0.0000000 0.0000000 0.0000000 0.0000000 0.0000000 0.0000000 0.0000000 0.0000000 0.0000000
NQMom= 0.0000000 0.0000000 0.0000000 0.0000000 0.0000000 0.0000000 0.0000000 0.0000000 0.0000000 0.0000000
NMagM= 0.0000000 0.0000000 0.0000000 2.7928460 2.7928460 2.7928460 2.7928460 2.7928460 2.7928460 2.7928460
AtZNuc= 6.0000000 6.0000000 6.0000000 1.0000000 1.0000000 1.0000000 1.0000000 1.0000000 1.0000000 1.0000000
Atom 31 32 33 34 35 36 37 38 39 40
IAtWgt= 1 1 1 1 1 12 12 12 14 12
AtmWgt= 1.0078250 1.0078250 1.0078250 1.0078250 1.0078250 12.0000000 12.0000000 12.0000000 14.0030740 12.0000000
NucSpn= 1 1 1 1 1 0 0 0 2 0
AtZEff= 0.0000000 0.0000000 0.0000000 0.0000000 0.0000000 0.0000000 0.0000000 0.0000000 0.0000000 0.0000000
NQMom= 0.0000000 0.0000000 0.0000000 0.0000000 0.0000000 0.0000000 0.0000000 0.0000000 2.0440000 0.0000000
NMagM= 2.7928460 2.7928460 2.7928460 2.7928460 2.7928460 0.0000000 0.0000000 0.0000000 0.4037610 0.0000000
AtZNuc= 1.0000000 1.0000000 1.0000000 1.0000000 1.0000000 6.0000000 6.0000000 6.0000000 7.0000000 6.0000000
Atom 41 42 43 44 45 46 47 48 49 50
IAtWgt= 14 12 12 12 12 12 12 12 12 12
AtmWgt= 14.0030740 12.0000000 12.0000000 12.0000000 12.0000000 12.0000000 12.0000000 12.0000000 12.0000000 12.0000000
NucSpn= 2 0 0 0 0 0 0 0 0 0
AtZEff= 0.0000000 0.0000000 0.0000000 0.0000000 0.0000000 0.0000000 0.0000000 0.0000000 0.0000000 0.0000000
NQMom= 2.0440000 0.0000000 0.0000000 0.0000000 0.0000000 0.0000000 0.0000000 0.0000000 0.0000000 0.0000000
NMagM= 0.4037610 0.0000000 0.0000000 0.0000000 0.0000000 0.0000000 0.0000000 0.0000000 0.0000000 0.0000000
AtZNuc= 7.0000000 6.0000000 6.0000000 6.0000000 6.0000000 6.0000000 6.0000000 6.0000000 6.0000000 6.0000000
Atom 51 52 53 54 55 56 57 58 59 60
IAtWgt= 12 12 12 12 12 12 1 1 1 1
AtmWgt= 12.0000000 12.0000000 12.0000000 12.0000000 12.0000000 12.0000000 1.0078250 1.0078250 1.0078250 1.0078250
NucSpn= 0 0 0 0 0 0 1 1 1 1
AtZEff= 0.0000000 0.0000000 0.0000000 0.0000000 0.0000000 0.0000000 0.0000000 0.0000000 0.0000000 0.0000000
NQMom= 0.0000000 0.0000000 0.0000000 0.0000000 0.0000000 0.0000000 0.0000000 0.0000000 0.0000000 0.0000000
NMagM= 0.0000000 0.0000000 0.0000000 0.0000000 0.0000000 0.0000000 2.7928460 2.7928460 2.7928460 2.7928460
AtZNuc= 6.0000000 6.0000000 6.0000000 6.0000000 6.0000000 6.0000000 1.0000000 1.0000000 1.0000000 1.0000000
Atom 61 62 63 64 65 66 67 68 69 70
IAtWgt= 1 1 1 1 1 1 1 1 1 1
AtmWgt= 1.0078250 1.0078250 1.0078250 1.0078250 1.0078250 1.0078250 1.0078250 1.0078250 1.0078250 1.0078250
NucSpn= 1 1 1 1 1 1 1 1 1 1
AtZEff= 0.0000000 0.0000000 0.0000000 0.0000000 0.0000000 0.0000000 0.0000000 0.0000000 0.0000000 0.0000000
NQMom= 0.0000000 0.0000000 0.0000000 0.0000000 0.0000000 0.0000000 0.0000000 0.0000000 0.0000000 0.0000000
NMagM= 2.7928460 2.7928460 2.7928460 2.7928460 2.7928460 2.7928460 2.7928460 2.7928460 2.7928460 2.7928460
AtZNuc= 1.0000000 1.0000000 1.0000000 1.0000000 1.0000000 1.0000000 1.0000000 1.0000000 1.0000000 1.0000000
Atom 71 72 73 74 75
IAtWgt= 1 1 1 1 1
AtmWgt= 1.0078250 1.0078250 1.0078250 1.0078250 1.0078250
NucSpn= 1 1 1 1 1
AtZEff= 0.0000000 0.0000000 0.0000000 0.0000000 0.0000000
NQMom= 0.0000000 0.0000000 0.0000000 0.0000000 0.0000000
NMagM= 2.7928460 2.7928460 2.7928460 2.7928460 2.7928460
AtZNuc= 1.0000000 1.0000000 1.0000000 1.0000000 1.0000000
Leave Link 101 at Sat May 27 23:28:50 2023, MaxMem= 4294967296 cpu: 16.1
(Enter /public/apps/gs/g09/l103.exe)
GradGradGradGradGradGradGradGradGradGradGradGradGradGradGradGradGradGrad
Berny optimization.
Initialization pass.
----------------------------
! Initial Parameters !
! (Angstroms and Degrees) !
-------------------------- --------------------------
! Name Definition Value Derivative Info. !
--------------------------------------------------------------------------------
! R1 R(1,2) 1.3911 estimate D2E/DX2 !
! R2 R(1,5) 1.4189 estimate D2E/DX2 !
! R3 R(1,16) 1.3538 estimate D2E/DX2 !
! R4 R(2,3) 1.4843 estimate D2E/DX2 !
! R5 R(2,8) 1.4376 estimate D2E/DX2 !
! R6 R(3,4) 1.385 estimate D2E/DX2 !
! R7 R(3,9) 1.4358 estimate D2E/DX2 !
! R8 R(4,17) 1.3598 estimate D2E/DX2 !
! R9 R(4,18) 1.4141 estimate D2E/DX2 !
! R10 R(5,6) 1.3666 estimate D2E/DX2 !
! R11 R(5,24) 1.0833 estimate D2E/DX2 !
! R12 R(6,7) 1.4187 estimate D2E/DX2 !
! R13 R(6,25) 1.0842 estimate D2E/DX2 !
! R14 R(7,8) 1.4305 estimate D2E/DX2 !
! R15 R(7,13) 1.4177 estimate D2E/DX2 !
! R16 R(8,23) 1.421 estimate D2E/DX2 !
! R17 R(9,10) 1.4325 estimate D2E/DX2 !
! R18 R(9,19) 1.4214 estimate D2E/DX2 !
! R19 R(10,11) 1.4188 estimate D2E/DX2 !
! R20 R(10,12) 1.4189 estimate D2E/DX2 !
! R21 R(11,18) 1.3688 estimate D2E/DX2 !
! R22 R(11,26) 1.0842 estimate D2E/DX2 !
! R23 R(12,21) 1.373 estimate D2E/DX2 !
! R24 R(12,27) 1.0846 estimate D2E/DX2 !
! R25 R(13,14) 1.374 estimate D2E/DX2 !
! R26 R(13,28) 1.0847 estimate D2E/DX2 !
! R27 R(14,22) 1.4125 estimate D2E/DX2 !
! R28 R(14,29) 1.0836 estimate D2E/DX2 !
! R29 R(15,16) 1.4633 estimate D2E/DX2 !
! R30 R(15,17) 1.4638 estimate D2E/DX2 !
! R31 R(15,39) 1.5668 estimate D2E/DX2 !
! R32 R(15,41) 1.5611 estimate D2E/DX2 !
! R33 R(18,30) 1.0831 estimate D2E/DX2 !
! R34 R(19,20) 1.3745 estimate D2E/DX2 !
! R35 R(19,31) 1.0806 estimate D2E/DX2 !
! R36 R(20,21) 1.413 estimate D2E/DX2 !
! R37 R(20,32) 1.0839 estimate D2E/DX2 !
! R38 R(21,33) 1.0836 estimate D2E/DX2 !
! R39 R(22,23) 1.3751 estimate D2E/DX2 !
! R40 R(22,34) 1.084 estimate D2E/DX2 !
! R41 R(23,35) 1.0814 estimate D2E/DX2 !
! R42 R(36,37) 1.3924 estimate D2E/DX2 !
! R43 R(36,47) 1.3955 estimate D2E/DX2 !
! R44 R(36,57) 1.0836 estimate D2E/DX2 !
! R45 R(37,44) 1.3938 estimate D2E/DX2 !
! R46 R(37,58) 1.0835 estimate D2E/DX2 !
! R47 R(38,47) 1.4888 estimate D2E/DX2 !
! R48 R(38,49) 1.3962 estimate D2E/DX2 !
! R49 R(38,50) 1.3952 estimate D2E/DX2 !
! R50 R(39,50) 1.4079 estimate D2E/DX2 !
! R51 R(39,53) 1.3558 estimate D2E/DX2 !
! R52 R(40,51) 1.497 estimate D2E/DX2 !
! R53 R(40,59) 1.092 estimate D2E/DX2 !
! R54 R(40,60) 1.0915 estimate D2E/DX2 !
! R55 R(40,61) 1.091 estimate D2E/DX2 !
! R56 R(41,49) 1.405 estimate D2E/DX2 !
! R57 R(41,54) 1.3528 estimate D2E/DX2 !
! R58 R(42,53) 1.4909 estimate D2E/DX2 !
! R59 R(42,62) 1.0912 estimate D2E/DX2 !
! R60 R(42,63) 1.0921 estimate D2E/DX2 !
! R61 R(42,64) 1.086 estimate D2E/DX2 !
! R62 R(43,56) 1.4972 estimate D2E/DX2 !
! R63 R(43,65) 1.091 estimate D2E/DX2 !
! R64 R(43,66) 1.0915 estimate D2E/DX2 !
! R65 R(43,67) 1.0921 estimate D2E/DX2 !
! R66 R(44,45) 1.3939 estimate D2E/DX2 !
! R67 R(44,68) 1.0835 estimate D2E/DX2 !
! R68 R(45,46) 1.3925 estimate D2E/DX2 !
! R69 R(45,69) 1.0835 estimate D2E/DX2 !
! R70 R(46,47) 1.3958 estimate D2E/DX2 !
! R71 R(46,70) 1.0835 estimate D2E/DX2 !
! R72 R(48,54) 1.4882 estimate D2E/DX2 !
! R73 R(48,71) 1.092 estimate D2E/DX2 !
! R74 R(48,72) 1.0903 estimate D2E/DX2 !
! R75 R(48,73) 1.0901 estimate D2E/DX2 !
! R76 R(49,56) 1.429 estimate D2E/DX2 !
! R77 R(50,51) 1.4296 estimate D2E/DX2 !
! R78 R(51,52) 1.3869 estimate D2E/DX2 !
! R79 R(52,53) 1.409 estimate D2E/DX2 !
! R80 R(52,74) 1.0797 estimate D2E/DX2 !
! R81 R(54,55) 1.4071 estimate D2E/DX2 !
! R82 R(55,56) 1.3893 estimate D2E/DX2 !
! R83 R(55,75) 1.0797 estimate D2E/DX2 !
! A1 A(2,1,5) 120.5599 estimate D2E/DX2 !
! A2 A(2,1,16) 123.807 estimate D2E/DX2 !
! A3 A(5,1,16) 115.585 estimate D2E/DX2 !
! A4 A(1,2,3) 120.9255 estimate D2E/DX2 !
! A5 A(1,2,8) 118.1516 estimate D2E/DX2 !
! A6 A(3,2,8) 120.9219 estimate D2E/DX2 !
! A7 A(2,3,4) 119.8416 estimate D2E/DX2 !
! A8 A(2,3,9) 121.6783 estimate D2E/DX2 !
! A9 A(4,3,9) 118.3513 estimate D2E/DX2 !
! A10 A(3,4,17) 120.4729 estimate D2E/DX2 !
! A11 A(3,4,18) 121.7277 estimate D2E/DX2 !
! A12 A(17,4,18) 117.7974 estimate D2E/DX2 !
! A13 A(1,5,6) 121.1175 estimate D2E/DX2 !
! A14 A(1,5,24) 117.3804 estimate D2E/DX2 !
! A15 A(6,5,24) 121.497 estimate D2E/DX2 !
! A16 A(5,6,7) 120.3437 estimate D2E/DX2 !
! A17 A(5,6,25) 120.4682 estimate D2E/DX2 !
! A18 A(7,6,25) 119.1503 estimate D2E/DX2 !
! A19 A(6,7,8) 118.8564 estimate D2E/DX2 !
! A20 A(6,7,13) 121.4639 estimate D2E/DX2 !
! A21 A(8,7,13) 119.6749 estimate D2E/DX2 !
! A22 A(2,8,7) 120.0388 estimate D2E/DX2 !
! A23 A(2,8,23) 122.2693 estimate D2E/DX2 !
! A24 A(7,8,23) 117.6624 estimate D2E/DX2 !
! A25 A(3,9,10) 119.4658 estimate D2E/DX2 !
! A26 A(3,9,19) 122.813 estimate D2E/DX2 !
! A27 A(10,9,19) 117.6397 estimate D2E/DX2 !
! A28 A(9,10,11) 119.3299 estimate D2E/DX2 !
! A29 A(9,10,12) 119.5855 estimate D2E/DX2 !
! A30 A(11,10,12) 121.062 estimate D2E/DX2 !
! A31 A(10,11,18) 120.4145 estimate D2E/DX2 !
! A32 A(10,11,26) 118.9923 estimate D2E/DX2 !
! A33 A(18,11,26) 120.5599 estimate D2E/DX2 !
! A34 A(10,12,21) 121.0386 estimate D2E/DX2 !
! A35 A(10,12,27) 118.3928 estimate D2E/DX2 !
! A36 A(21,12,27) 120.5616 estimate D2E/DX2 !
! A37 A(7,13,14) 121.0158 estimate D2E/DX2 !
! A38 A(7,13,28) 118.4332 estimate D2E/DX2 !
! A39 A(14,13,28) 120.5459 estimate D2E/DX2 !
! A40 A(13,14,22) 119.5727 estimate D2E/DX2 !
! A41 A(13,14,29) 120.4388 estimate D2E/DX2 !
! A42 A(22,14,29) 119.9826 estimate D2E/DX2 !
! A43 A(16,15,17) 113.7867 estimate D2E/DX2 !
! A44 A(16,15,39) 106.1338 estimate D2E/DX2 !
! A45 A(16,15,41) 113.1719 estimate D2E/DX2 !
! A46 A(17,15,39) 112.7456 estimate D2E/DX2 !
! A47 A(17,15,41) 103.9525 estimate D2E/DX2 !
! A48 A(39,15,41) 106.9987 estimate D2E/DX2 !
! A49 A(1,16,15) 125.0366 estimate D2E/DX2 !
! A50 A(4,17,15) 117.0157 estimate D2E/DX2 !
! A51 A(4,18,11) 120.3366 estimate D2E/DX2 !
! A52 A(4,18,30) 117.962 estimate D2E/DX2 !
! A53 A(11,18,30) 121.7009 estimate D2E/DX2 !
! A54 A(9,19,20) 121.3133 estimate D2E/DX2 !
! A55 A(9,19,31) 119.161 estimate D2E/DX2 !
! A56 A(20,19,31) 119.5222 estimate D2E/DX2 !
! A57 A(19,20,21) 120.7285 estimate D2E/DX2 !
! A58 A(19,20,32) 119.6363 estimate D2E/DX2 !
! A59 A(21,20,32) 119.6339 estimate D2E/DX2 !
! A60 A(12,21,20) 119.5946 estimate D2E/DX2 !
! A61 A(12,21,33) 120.4373 estimate D2E/DX2 !
! A62 A(20,21,33) 119.9581 estimate D2E/DX2 !
! A63 A(14,22,23) 120.7014 estimate D2E/DX2 !
! A64 A(14,22,34) 119.6529 estimate D2E/DX2 !
! A65 A(23,22,34) 119.6449 estimate D2E/DX2 !
! A66 A(8,23,22) 121.3162 estimate D2E/DX2 !
! A67 A(8,23,35) 119.0909 estimate D2E/DX2 !
! A68 A(22,23,35) 119.5888 estimate D2E/DX2 !
! A69 A(37,36,47) 120.1093 estimate D2E/DX2 !
! A70 A(37,36,57) 120.3515 estimate D2E/DX2 !
! A71 A(47,36,57) 119.539 estimate D2E/DX2 !
! A72 A(36,37,44) 120.1021 estimate D2E/DX2 !
! A73 A(36,37,58) 119.7546 estimate D2E/DX2 !
! A74 A(44,37,58) 120.1433 estimate D2E/DX2 !
! A75 A(47,38,49) 119.2809 estimate D2E/DX2 !
! A76 A(47,38,50) 119.2625 estimate D2E/DX2 !
! A77 A(49,38,50) 121.4548 estimate D2E/DX2 !
! A78 A(15,39,50) 122.862 estimate D2E/DX2 !
! A79 A(15,39,53) 128.8516 estimate D2E/DX2 !
! A80 A(50,39,53) 107.932 estimate D2E/DX2 !
! A81 A(51,40,59) 111.8038 estimate D2E/DX2 !
! A82 A(51,40,60) 111.821 estimate D2E/DX2 !
! A83 A(51,40,61) 109.5951 estimate D2E/DX2 !
! A84 A(59,40,60) 106.684 estimate D2E/DX2 !
! A85 A(59,40,61) 108.3356 estimate D2E/DX2 !
! A86 A(60,40,61) 108.4638 estimate D2E/DX2 !
! A87 A(15,41,49) 123.6687 estimate D2E/DX2 !
! A88 A(15,41,54) 127.0189 estimate D2E/DX2 !
! A89 A(49,41,54) 108.0606 estimate D2E/DX2 !
! A90 A(53,42,62) 108.789 estimate D2E/DX2 !
! A91 A(53,42,63) 111.0098 estimate D2E/DX2 !
! A92 A(53,42,64) 111.9524 estimate D2E/DX2 !
! A93 A(62,42,63) 107.4854 estimate D2E/DX2 !
! A94 A(62,42,64) 109.58 estimate D2E/DX2 !
! A95 A(63,42,64) 107.9187 estimate D2E/DX2 !
! A96 A(56,43,65) 109.602 estimate D2E/DX2 !
! A97 A(56,43,66) 111.9521 estimate D2E/DX2 !
! A98 A(56,43,67) 111.6926 estimate D2E/DX2 !
! A99 A(65,43,66) 108.4901 estimate D2E/DX2 !
! A100 A(65,43,67) 108.2576 estimate D2E/DX2 !
! A101 A(66,43,67) 106.7062 estimate D2E/DX2 !
! A102 A(37,44,45) 119.8703 estimate D2E/DX2 !
! A103 A(37,44,68) 120.064 estimate D2E/DX2 !
! A104 A(45,44,68) 120.0657 estimate D2E/DX2 !
! A105 A(44,45,46) 120.0816 estimate D2E/DX2 !
! A106 A(44,45,69) 120.1524 estimate D2E/DX2 !
! A107 A(46,45,69) 119.766 estimate D2E/DX2 !
! A108 A(45,46,47) 120.1159 estimate D2E/DX2 !
! A109 A(45,46,70) 120.3803 estimate D2E/DX2 !
! A110 A(47,46,70) 119.5038 estimate D2E/DX2 !
! A111 A(36,47,38) 120.392 estimate D2E/DX2 !
! A112 A(36,47,46) 119.7204 estimate D2E/DX2 !
! A113 A(38,47,46) 119.8875 estimate D2E/DX2 !
! A114 A(54,48,71) 111.5801 estimate D2E/DX2 !
! A115 A(54,48,72) 111.2465 estimate D2E/DX2 !
! A116 A(54,48,73) 109.405 estimate D2E/DX2 !
! A117 A(71,48,72) 107.3386 estimate D2E/DX2 !
! A118 A(71,48,73) 108.0101 estimate D2E/DX2 !
! A119 A(72,48,73) 109.168 estimate D2E/DX2 !
! A120 A(38,49,41) 120.8291 estimate D2E/DX2 !
! A121 A(38,49,56) 130.9278 estimate D2E/DX2 !
! A122 A(41,49,56) 108.1785 estimate D2E/DX2 !
! A123 A(38,50,39) 120.8852 estimate D2E/DX2 !
! A124 A(38,50,51) 130.4788 estimate D2E/DX2 !
! A125 A(39,50,51) 108.2676 estimate D2E/DX2 !
! A126 A(40,51,50) 129.3744 estimate D2E/DX2 !
! A127 A(40,51,52) 124.7072 estimate D2E/DX2 !
! A128 A(50,51,52) 105.9025 estimate D2E/DX2 !
! A129 A(51,52,53) 108.8869 estimate D2E/DX2 !
! A130 A(51,52,74) 126.4225 estimate D2E/DX2 !
! A131 A(53,52,74) 124.6835 estimate D2E/DX2 !
! A132 A(39,53,42) 126.7405 estimate D2E/DX2 !
! A133 A(39,53,52) 108.9943 estimate D2E/DX2 !
! A134 A(42,53,52) 124.264 estimate D2E/DX2 !
! A135 A(41,54,48) 124.9904 estimate D2E/DX2 !
! A136 A(41,54,55) 109.1284 estimate D2E/DX2 !
! A137 A(48,54,55) 125.8567 estimate D2E/DX2 !
! A138 A(54,55,56) 108.6555 estimate D2E/DX2 !
! A139 A(54,55,75) 124.8942 estimate D2E/DX2 !
! A140 A(56,55,75) 126.4461 estimate D2E/DX2 !
! A141 A(43,56,49) 129.3564 estimate D2E/DX2 !
! A142 A(43,56,55) 124.7079 estimate D2E/DX2 !
! A143 A(49,56,55) 105.9356 estimate D2E/DX2 !
! D1 D(5,1,2,3) 168.4221 estimate D2E/DX2 !
! D2 D(5,1,2,8) -11.225 estimate D2E/DX2 !
! D3 D(16,1,2,3) -8.9424 estimate D2E/DX2 !
! D4 D(16,1,2,8) 171.4105 estimate D2E/DX2 !
! D5 D(2,1,5,6) 5.6613 estimate D2E/DX2 !
! D6 D(2,1,5,24) -175.1476 estimate D2E/DX2 !
! D7 D(16,1,5,6) -176.7665 estimate D2E/DX2 !
! D8 D(16,1,5,24) 2.4246 estimate D2E/DX2 !
! D9 D(2,1,16,15) -46.8244 estimate D2E/DX2 !
! D10 D(5,1,16,15) 135.6916 estimate D2E/DX2 !
! D11 D(1,2,3,4) 50.0299 estimate D2E/DX2 !
! D12 D(1,2,3,9) -125.775 estimate D2E/DX2 !
! D13 D(8,2,3,4) -130.3328 estimate D2E/DX2 !
! D14 D(8,2,3,9) 53.8623 estimate D2E/DX2 !
! D15 D(1,2,8,7) 9.1935 estimate D2E/DX2 !
! D16 D(1,2,8,23) -168.7844 estimate D2E/DX2 !
! D17 D(3,2,8,7) -170.4536 estimate D2E/DX2 !
! D18 D(3,2,8,23) 11.5685 estimate D2E/DX2 !
! D19 D(2,3,4,17) -3.0314 estimate D2E/DX2 !
! D20 D(2,3,4,18) 177.4888 estimate D2E/DX2 !
! D21 D(9,3,4,17) 172.9121 estimate D2E/DX2 !
! D22 D(9,3,4,18) -6.5676 estimate D2E/DX2 !
! D23 D(2,3,9,10) -177.6373 estimate D2E/DX2 !
! D24 D(2,3,9,19) 5.7244 estimate D2E/DX2 !
! D25 D(4,3,9,10) 6.4974 estimate D2E/DX2 !
! D26 D(4,3,9,19) -170.1409 estimate D2E/DX2 !
! D27 D(3,4,17,15) -68.9789 estimate D2E/DX2 !
! D28 D(18,4,17,15) 110.5209 estimate D2E/DX2 !
! D29 D(3,4,18,11) 2.1014 estimate D2E/DX2 !
! D30 D(3,4,18,30) -178.1299 estimate D2E/DX2 !
! D31 D(17,4,18,11) -177.3918 estimate D2E/DX2 !
! D32 D(17,4,18,30) 2.377 estimate D2E/DX2 !
! D33 D(1,5,6,7) 2.3311 estimate D2E/DX2 !
! D34 D(1,5,6,25) -179.926 estimate D2E/DX2 !
! D35 D(24,5,6,7) -176.8265 estimate D2E/DX2 !
! D36 D(24,5,6,25) 0.9164 estimate D2E/DX2 !
! D37 D(5,6,7,8) -4.2288 estimate D2E/DX2 !
! D38 D(5,6,7,13) 174.9649 estimate D2E/DX2 !
! D39 D(25,6,7,8) 177.9988 estimate D2E/DX2 !
! D40 D(25,6,7,13) -2.8075 estimate D2E/DX2 !
! D41 D(6,7,8,2) -1.5712 estimate D2E/DX2 !
! D42 D(6,7,8,23) 176.4984 estimate D2E/DX2 !
! D43 D(13,7,8,2) 179.2204 estimate D2E/DX2 !
! D44 D(13,7,8,23) -2.71 estimate D2E/DX2 !
! D45 D(6,7,13,14) -177.5673 estimate D2E/DX2 !
! D46 D(6,7,13,28) 1.617 estimate D2E/DX2 !
! D47 D(8,7,13,14) 1.6199 estimate D2E/DX2 !
! D48 D(8,7,13,28) -179.1958 estimate D2E/DX2 !
! D49 D(2,8,23,22) 179.8232 estimate D2E/DX2 !
! D50 D(2,8,23,35) 0.5656 estimate D2E/DX2 !
! D51 D(7,8,23,22) 1.7996 estimate D2E/DX2 !
! D52 D(7,8,23,35) -177.458 estimate D2E/DX2 !
! D53 D(3,9,10,11) -2.1265 estimate D2E/DX2 !
! D54 D(3,9,10,12) 179.5847 estimate D2E/DX2 !
! D55 D(19,9,10,11) 174.6844 estimate D2E/DX2 !
! D56 D(19,9,10,12) -3.6043 estimate D2E/DX2 !
! D57 D(3,9,19,20) 179.3265 estimate D2E/DX2 !
! D58 D(3,9,19,31) 0.0111 estimate D2E/DX2 !
! D59 D(10,9,19,20) 2.6303 estimate D2E/DX2 !
! D60 D(10,9,19,31) -176.6851 estimate D2E/DX2 !
! D61 D(9,10,11,18) -2.4176 estimate D2E/DX2 !
! D62 D(9,10,11,26) 179.6678 estimate D2E/DX2 !
! D63 D(12,10,11,18) 175.8451 estimate D2E/DX2 !
! D64 D(12,10,11,26) -2.0695 estimate D2E/DX2 !
! D65 D(9,10,12,21) 1.9819 estimate D2E/DX2 !
! D66 D(9,10,12,27) -178.9737 estimate D2E/DX2 !
! D67 D(11,10,12,21) -176.2765 estimate D2E/DX2 !
! D68 D(11,10,12,27) 2.7679 estimate D2E/DX2 !
! D69 D(10,11,18,4) 2.525 estimate D2E/DX2 !
! D70 D(10,11,18,30) -177.235 estimate D2E/DX2 !
! D71 D(26,11,18,4) -179.5933 estimate D2E/DX2 !
! D72 D(26,11,18,30) 0.6467 estimate D2E/DX2 !
! D73 D(10,12,21,20) 0.7513 estimate D2E/DX2 !
! D74 D(10,12,21,33) 179.5997 estimate D2E/DX2 !
! D75 D(27,12,21,20) -178.2724 estimate D2E/DX2 !
! D76 D(27,12,21,33) 0.576 estimate D2E/DX2 !
! D77 D(7,13,14,22) 0.4802 estimate D2E/DX2 !
! D78 D(7,13,14,29) 179.5975 estimate D2E/DX2 !
! D79 D(28,13,14,22) -178.6869 estimate D2E/DX2 !
! D80 D(28,13,14,29) 0.4304 estimate D2E/DX2 !
! D81 D(13,14,22,23) -1.4419 estimate D2E/DX2 !
! D82 D(13,14,22,34) 178.212 estimate D2E/DX2 !
! D83 D(29,14,22,23) 179.4367 estimate D2E/DX2 !
! D84 D(29,14,22,34) -0.9094 estimate D2E/DX2 !
! D85 D(17,15,16,1) 20.1144 estimate D2E/DX2 !
! D86 D(39,15,16,1) 144.6809 estimate D2E/DX2 !
! D87 D(41,15,16,1) -98.2633 estimate D2E/DX2 !
! D88 D(16,15,17,4) 57.0773 estimate D2E/DX2 !
! D89 D(39,15,17,4) -63.8586 estimate D2E/DX2 !
! D90 D(41,15,17,4) -179.377 estimate D2E/DX2 !
! D91 D(16,15,39,50) 141.8685 estimate D2E/DX2 !
! D92 D(16,15,39,53) -45.819 estimate D2E/DX2 !
! D93 D(17,15,39,50) -92.9231 estimate D2E/DX2 !
! D94 D(17,15,39,53) 79.3894 estimate D2E/DX2 !
! D95 D(41,15,39,50) 20.7527 estimate D2E/DX2 !
! D96 D(41,15,39,53) -166.9349 estimate D2E/DX2 !
! D97 D(16,15,41,49) -134.222 estimate D2E/DX2 !
! D98 D(16,15,41,54) 60.1155 estimate D2E/DX2 !
! D99 D(17,15,41,49) 101.8326 estimate D2E/DX2 !
! D100 D(17,15,41,54) -63.8299 estimate D2E/DX2 !
! D101 D(39,15,41,49) -17.6755 estimate D2E/DX2 !
! D102 D(39,15,41,54) 176.662 estimate D2E/DX2 !
! D103 D(9,19,20,21) 0.0468 estimate D2E/DX2 !
! D104 D(9,19,20,32) -179.5403 estimate D2E/DX2 !
! D105 D(31,19,20,21) 179.3598 estimate D2E/DX2 !
! D106 D(31,19,20,32) -0.2273 estimate D2E/DX2 !
! D107 D(19,20,21,12) -1.7959 estimate D2E/DX2 !
! D108 D(19,20,21,33) 179.3501 estimate D2E/DX2 !
! D109 D(32,20,21,12) 177.7912 estimate D2E/DX2 !
! D110 D(32,20,21,33) -1.0628 estimate D2E/DX2 !
! D111 D(14,22,23,8) 0.2626 estimate D2E/DX2 !
! D112 D(14,22,23,35) 179.5166 estimate D2E/DX2 !
! D113 D(34,22,23,8) -179.3914 estimate D2E/DX2 !
! D114 D(34,22,23,35) -0.1374 estimate D2E/DX2 !
! D115 D(47,36,37,44) -0.1753 estimate D2E/DX2 !
! D116 D(47,36,37,58) 179.8657 estimate D2E/DX2 !
! D117 D(57,36,37,44) 179.9783 estimate D2E/DX2 !
! D118 D(57,36,37,58) 0.0192 estimate D2E/DX2 !
! D119 D(37,36,47,38) -179.8485 estimate D2E/DX2 !
! D120 D(37,36,47,46) 0.0727 estimate D2E/DX2 !
! D121 D(57,36,47,38) -0.0008 estimate D2E/DX2 !
! D122 D(57,36,47,46) 179.9204 estimate D2E/DX2 !
! D123 D(36,37,44,45) 0.0926 estimate D2E/DX2 !
! D124 D(36,37,44,68) -179.8952 estimate D2E/DX2 !
! D125 D(58,37,44,45) -179.9485 estimate D2E/DX2 !
! D126 D(58,37,44,68) 0.0636 estimate D2E/DX2 !
! D127 D(49,38,47,36) -85.8327 estimate D2E/DX2 !
! D128 D(49,38,47,46) 94.2462 estimate D2E/DX2 !
! D129 D(50,38,47,36) 93.6757 estimate D2E/DX2 !
! D130 D(50,38,47,46) -86.2454 estimate D2E/DX2 !
! D131 D(47,38,49,41) -177.7017 estimate D2E/DX2 !
! D132 D(47,38,49,56) -0.9942 estimate D2E/DX2 !
! D133 D(50,38,49,41) 2.8011 estimate D2E/DX2 !
! D134 D(50,38,49,56) 179.5085 estimate D2E/DX2 !
! D135 D(47,38,50,39) -179.0754 estimate D2E/DX2 !
! D136 D(47,38,50,51) -6.9139 estimate D2E/DX2 !
! D137 D(49,38,50,39) 0.422 estimate D2E/DX2 !
! D138 D(49,38,50,51) 172.5835 estimate D2E/DX2 !
! D139 D(15,39,50,38) -13.9033 estimate D2E/DX2 !
! D140 D(15,39,50,51) 172.3684 estimate D2E/DX2 !
! D141 D(53,39,50,38) 172.383 estimate D2E/DX2 !
! D142 D(53,39,50,51) -1.3453 estimate D2E/DX2 !
! D143 D(15,39,53,42) 8.2737 estimate D2E/DX2 !
! D144 D(15,39,53,52) -172.1174 estimate D2E/DX2 !
! D145 D(50,39,53,42) -178.5089 estimate D2E/DX2 !
! D146 D(50,39,53,52) 1.1 estimate D2E/DX2 !
! D147 D(59,40,51,50) -61.0363 estimate D2E/DX2 !
! D148 D(59,40,51,52) 117.3097 estimate D2E/DX2 !
! D149 D(60,40,51,50) 58.5186 estimate D2E/DX2 !
! D150 D(60,40,51,52) -123.1354 estimate D2E/DX2 !
! D151 D(61,40,51,50) 178.8272 estimate D2E/DX2 !
! D152 D(61,40,51,52) -2.8268 estimate D2E/DX2 !
! D153 D(15,41,49,38) 7.5094 estimate D2E/DX2 !
! D154 D(15,41,49,56) -169.8728 estimate D2E/DX2 !
! D155 D(54,41,49,38) 175.5062 estimate D2E/DX2 !
! D156 D(54,41,49,56) -1.876 estimate D2E/DX2 !
! D157 D(15,41,54,48) -8.7084 estimate D2E/DX2 !
! D158 D(15,41,54,55) 169.5769 estimate D2E/DX2 !
! D159 D(49,41,54,48) -176.1887 estimate D2E/DX2 !
! D160 D(49,41,54,55) 2.0966 estimate D2E/DX2 !
! D161 D(62,42,53,39) 153.6856 estimate D2E/DX2 !
! D162 D(62,42,53,52) -25.8669 estimate D2E/DX2 !
! D163 D(63,42,53,39) -88.2384 estimate D2E/DX2 !
! D164 D(63,42,53,52) 92.2091 estimate D2E/DX2 !
! D165 D(64,42,53,39) 32.4348 estimate D2E/DX2 !
! D166 D(64,42,53,52) -147.1177 estimate D2E/DX2 !
! D167 D(65,43,56,49) -176.1175 estimate D2E/DX2 !
! D168 D(65,43,56,55) 3.7687 estimate D2E/DX2 !
! D169 D(66,43,56,49) -55.6862 estimate D2E/DX2 !
! D170 D(66,43,56,55) 124.1999 estimate D2E/DX2 !
! D171 D(67,43,56,49) 63.9105 estimate D2E/DX2 !
! D172 D(67,43,56,55) -116.2033 estimate D2E/DX2 !
! D173 D(37,44,45,46) 0.0925 estimate D2E/DX2 !
! D174 D(37,44,45,69) -179.988 estimate D2E/DX2 !
! D175 D(68,44,45,46) -179.9197 estimate D2E/DX2 !
! D176 D(68,44,45,69) -0.0001 estimate D2E/DX2 !
! D177 D(44,45,46,47) -0.1951 estimate D2E/DX2 !
! D178 D(44,45,46,70) 179.8413 estimate D2E/DX2 !
! D179 D(69,45,46,47) 179.8851 estimate D2E/DX2 !
! D180 D(69,45,46,70) -0.0786 estimate D2E/DX2 !
! D181 D(45,46,47,36) 0.1123 estimate D2E/DX2 !
! D182 D(45,46,47,38) -179.9661 estimate D2E/DX2 !
! D183 D(70,46,47,36) -179.9238 estimate D2E/DX2 !
! D184 D(70,46,47,38) -0.0021 estimate D2E/DX2 !
! D185 D(71,48,54,41) -76.1154 estimate D2E/DX2 !
! D186 D(71,48,54,55) 105.8836 estimate D2E/DX2 !
! D187 D(72,48,54,41) 43.7284 estimate D2E/DX2 !
! D188 D(72,48,54,55) -134.2726 estimate D2E/DX2 !
! D189 D(73,48,54,41) 164.4229 estimate D2E/DX2 !
! D190 D(73,48,54,55) -13.5781 estimate D2E/DX2 !
! D191 D(38,49,56,43) 3.793 estimate D2E/DX2 !
! D192 D(38,49,56,55) -176.1097 estimate D2E/DX2 !
! D193 D(41,49,56,43) -179.1825 estimate D2E/DX2 !
! D194 D(41,49,56,55) 0.9148 estimate D2E/DX2 !
! D195 D(38,50,51,40) 6.7224 estimate D2E/DX2 !
! D196 D(38,50,51,52) -171.8638 estimate D2E/DX2 !
! D197 D(39,50,51,40) 179.6425 estimate D2E/DX2 !
! D198 D(39,50,51,52) 1.0563 estimate D2E/DX2 !
! D199 D(40,51,52,53) -179.0627 estimate D2E/DX2 !
! D200 D(40,51,52,74) -0.0026 estimate D2E/DX2 !
! D201 D(50,51,52,53) -0.3921 estimate D2E/DX2 !
! D202 D(50,51,52,74) 178.668 estimate D2E/DX2 !
! D203 D(51,52,53,39) -0.4391 estimate D2E/DX2 !
! D204 D(51,52,53,42) 179.1817 estimate D2E/DX2 !
! D205 D(74,52,53,39) -179.5194 estimate D2E/DX2 !
! D206 D(74,52,53,42) 0.1014 estimate D2E/DX2 !
! D207 D(41,54,55,56) -1.5388 estimate D2E/DX2 !
! D208 D(41,54,55,75) 179.1659 estimate D2E/DX2 !
! D209 D(48,54,55,56) 176.7279 estimate D2E/DX2 !
! D210 D(48,54,55,75) -2.5674 estimate D2E/DX2 !
! D211 D(54,55,56,43) -179.5637 estimate D2E/DX2 !
! D212 D(54,55,56,49) 0.3448 estimate D2E/DX2 !
! D213 D(75,55,56,43) -0.2822 estimate D2E/DX2 !
! D214 D(75,55,56,49) 179.6263 estimate D2E/DX2 !
--------------------------------------------------------------------------------
Trust Radius=3.00D-01 FncErr=1.00D-07 GrdErr=1.00D-06
Number of steps in this run= 450 maximum allowed number of steps= 450.
GradGradGradGradGradGradGradGradGradGradGradGradGradGradGradGradGradGrad
Leave Link 103 at Sat May 27 23:28:50 2023, MaxMem= 4294967296 cpu: 0.6
(Enter /public/apps/gs/g09/l202.exe)
Symmetry turned off by external request.
Stoichiometry C39H31BN2O2
Framework group C1[X(C39H31BN2O2)]
Deg. of freedom 219
Full point group C1 NOp 1
Input orientation:
---------------------------------------------------------------------
Center Atomic Atomic Coordinates (Angstroms)
Number Number Type X Y Z
---------------------------------------------------------------------
1 6 0 -1.794577 1.231657 -1.117903
2 6 0 -2.683558 0.650632 -0.219380
3 6 0 -2.366929 -0.641117 0.439593
4 6 0 -1.142088 -0.815143 1.062286
5 6 0 -2.197133 2.327304 -1.924626
6 6 0 -3.421520 2.912023 -1.761704
7 6 0 -4.300348 2.462854 -0.742628
8 6 0 -3.920917 1.332268 0.047327
9 6 0 -3.264804 -1.759767 0.376538
10 6 0 -2.935411 -2.967821 1.072401
11 6 0 -1.705340 -3.052200 1.774319
12 6 0 -3.825103 -4.071809 1.019084
13 6 0 -5.530081 3.119117 -0.483705
14 6 0 -6.351252 2.706781 0.537764
15 5 0 0.420735 0.438257 -0.274417
16 8 0 -0.534679 0.782885 -1.327794
17 8 0 -0.202344 0.166867 1.022083
18 6 0 -0.818912 -2.009572 1.746881
19 6 0 -4.449354 -1.753356 -0.409085
20 6 0 -5.280335 -2.847133 -0.457522
21 6 0 -4.979265 -4.015721 0.277556
22 6 0 -5.961222 1.618846 1.349801
23 6 0 -4.783604 0.950578 1.110061
24 1 0 -1.491266 2.688266 -2.662913
25 1 0 -3.718828 3.748020 -2.384848
26 1 0 -1.464017 -3.967138 2.303613
27 1 0 -3.564680 -4.970993 1.566858
28 1 0 -5.804001 3.966106 -1.103521
29 1 0 -7.286102 3.219283 0.731499
30 1 0 0.144472 -2.068503 2.238312
31 1 0 -4.692968 -0.873562 -0.987206
32 1 0 -6.172979 -2.815324 -1.071591
33 1 0 -5.648586 -4.866954 0.238568
34 1 0 -6.594177 1.310957 2.174163
35 1 0 -4.498702 0.125090 1.747883
36 6 0 5.764864 0.274007 -0.883293
37 6 0 7.128890 0.086264 -0.676290
38 6 0 3.391867 0.131281 -0.099127
39 7 0 1.246226 -0.778219 -0.816314
40 6 0 4.374163 -2.861423 -1.045636
41 7 0 1.439087 1.581797 0.029374
42 6 0 -0.588288 -2.170027 -1.901016
43 6 0 4.833441 2.888648 0.986716
44 6 0 7.587217 -0.436202 0.531922
45 6 0 6.677056 -0.772493 1.532629
46 6 0 5.312400 -0.588802 1.325357
47 6 0 4.852007 -0.063700 0.116772
48 6 0 -0.212231 3.416279 0.540496
49 6 0 2.821100 1.375527 0.175607
50 6 0 2.625995 -0.930526 -0.581386
51 6 0 3.021433 -2.220238 -1.054573
52 6 0 1.876816 -2.798705 -1.582531
53 6 0 0.801543 -1.900371 -1.433755
54 6 0 1.154588 2.833952 0.455004
55 6 0 2.348333 3.473523 0.836823
56 6 0 3.401394 2.581710 0.676012
57 1 0 5.404153 0.680200 -1.820842
58 1 0 7.832426 0.348408 -1.457508
59 1 0 5.097944 -2.289581 -1.630122
60 1 0 4.779328 -2.939821 -0.035145
61 1 0 4.306468 -3.864403 -1.469532
62 1 0 -0.549368 -2.881102 -2.727788
63 1 0 -1.187427 -2.621869 -1.107510
64 1 0 -1.091070 -1.263275 -2.224199
65 1 0 4.908370 3.888111 1.417721
66 1 0 5.259903 2.174169 1.693146
67 1 0 5.457104 2.854738 0.090854
68 1 0 8.648929 -0.580458 0.692988
69 1 0 7.028329 -1.178790 2.473677
70 1 0 4.600485 -0.850949 2.098928
71 1 0 -0.591055 3.698052 -0.444140
72 1 0 -0.918663 2.704935 0.969067
73 1 0 -0.185977 4.312429 1.160635
74 1 0 1.806106 -3.769726 -2.049370
75 1 0 2.416154 4.486584 1.203944
---------------------------------------------------------------------
Rotational constants (GHZ): 0.1527392 0.0553806 0.0453053
Leave Link 202 at Sat May 27 23:28:50 2023, MaxMem= 4294967296 cpu: 0.2
(Enter /public/apps/gs/g09/l301.exe)
Standard basis: 6-311G(d,p) (5D, 7F)
Ernie: Thresh= 0.10000D-02 Tol= 0.10000D-05 Strict=F.
The following finite field(s) will be applied:
An electric field of 0.0020 0.0000 0.0000
978 basis functions, 1656 primitive gaussians, 1022 cartesian basis functions
150 alpha electrons 150 beta electrons
nuclear repulsion energy 5188.9767310978 Hartrees.
IExCor= 402 DFT=T Ex+Corr=B3LYP ExCW=0 ScaHFX= 0.200000
ScaDFX= 0.800000 0.720000 1.000000 0.810000 ScalE2= 1.000000 1.000000
IRadAn= 0 IRanWt= -1 IRanGd= 0 ICorTp=0 IEmpDi=141
NAtoms= 75 NActive= 75 NUniq= 75 SFac= 1.00D+00 NAtFMM= 60 NAOKFM=T Big=T
Integral buffers will be 131072 words long.
Raffenetti 2 integral format.
Two-electron integral symmetry is turned off.
R6Disp: Grimme-D3(BJ) Dispersion energy= -0.2146226560 Hartrees.
Nuclear repulsion after empirical dispersion term = 5188.7621084418 Hartrees.
------------------------------------------------------------------------------
Polarizable Continuum Model (PCM)
=================================
Model : PCM (using non-symmetric T matrix).
Atomic radii : UFF (Universal Force Field).
Polarization charges : Total charges.
Charge compensation : None.
Solution method : On-the-fly selection.
Cavity type : Scaled VdW (van der Waals Surface) (Alpha=1.100).
Cavity algorithm : GePol (No added spheres)
Default sphere list used, NSphG= 75.
Lebedev-Laikov grids with approx. 5.0 points / Ang**2.
Smoothing algorithm: York/Karplus (Gamma=1.0000).
Polarization charges: spherical gaussians, with
point-specific exponents (IZeta= 3).
Self-potential: point-specific (ISelfS= 7).
Self-field : sphere-specific E.n sum rule (ISelfD= 2).
1st derivatives : Analytical E(r).r(x)/FMM algorithm (CHGder, D1EAlg=3).
Cavity 1st derivative terms included.
Solvent : Water, Eps= 78.355300 Eps(inf)= 1.777849
------------------------------------------------------------------------------
GePol: Number of generator spheres = 75
GePol: Total number of spheres = 75
GePol: Number of exposed spheres = 75 (100.00%)
GePol: Number of points = 4849
GePol: Average weight of points = 0.13
GePol: Minimum weight of points = 0.22D-10
GePol: Maximum weight of points = 0.20577
GePol: Number of points with low weight = 387
GePol: Fraction of low-weight points (<1% of avg) = 7.98%
GePol: Cavity surface area = 614.933 Ang**2
GePol: Cavity volume = 758.357 Ang**3
Leave Link 301 at Sat May 27 23:28:50 2023, MaxMem= 4294967296 cpu: 3.3
(Enter /public/apps/gs/g09/l302.exe)
NPDir=0 NMtPBC= 1 NCelOv= 1 NCel= 1 NClECP= 1 NCelD= 1
NCelK= 1 NCelE2= 1 NClLst= 1 CellRange= 0.0.
One-electron integrals computed using PRISM.
NBasis= 978 RedAO= T EigKep= 7.67D-05 NBF= 978
NBsUse= 978 1.00D-06 EigRej= -1.00D+00 NBFU= 978
Precomputing XC quadrature grid using
IXCGrd= 4 IRadAn= 0 IRanWt= -1 IRanGd= 0 AccXCQ= 0.00D+00.
Generated NRdTot= 0 NPtTot= 0 NUsed= 0 NTot= 32
NSgBfM= 944 949 958 958 959 MxSgAt= 75 MxSgA2= 75.
Leave Link 302 at Sat May 27 23:28:53 2023, MaxMem= 4294967296 cpu: 66.2
(Enter /public/apps/gs/g09/l303.exe)
DipDrv: MaxL=1.
The nuclear repulsion energy is now 5188.7621084304 hartrees.
Leave Link 303 at Sat May 27 23:28:53 2023, MaxMem= 4294967296 cpu: 5.0
(Enter /public/apps/gs/g09/l401.exe)
ExpMin= 9.89D-02 ExpMax= 8.59D+03 ExpMxC= 1.30D+03 IAcc=2 IRadAn= 4 AccDes= 0.00D+00
Harris functional with IExCor= 402 and IRadAn= 4 diagonalized for initial guess.
HarFok: IExCor= 402 AccDes= 0.00D+00 IRadAn= 4 IDoV= 1 UseB2=F ITyADJ=14
ICtDFT= 3500011 ScaDFX= 1.000000 1.000000 1.000000 1.000000
FoFCou: FMM=F IPFlag= 0 FMFlag= 100000 FMFlg1= 2001
NFxFlg= 0 DoJE=T BraDBF=F KetDBF=T FulRan=T
wScrn= 0.000000 ICntrl= 500 IOpCl= 0 I1Cent= 200000004 NGrid= 0
NMat0= 1 NMatS0= 1 NMatT0= 0 NMatD0= 1 NMtDS0= 0 NMtDT0= 0
Symmetry not used in FoFCou.
Harris En= -1790.51799280685
JPrj=0 DoOrth=F DoCkMO=F.
Leave Link 401 at Sat May 27 23:28:56 2023, MaxMem= 4294967296 cpu: 96.6
(Enter /public/apps/gs/g09/l502.exe)
Closed shell SCF:
Using DIIS extrapolation, IDIIS= 1040.
Two-electron integral symmetry not used.
IVT= 3190988 IEndB= 3190988 NGot= 4294967296 MDV= 4292838455
LenX= 4292838455 LenY= 4291792949
Requested convergence on RMS density matrix=1.00D-08 within 128 cycles.
Requested convergence on MAX density matrix=1.00D-06.
Requested convergence on energy=1.00D-06.
No special actions if energy rises.
Fock matrices will be formed incrementally for 20 cycles.
Cycle 1 Pass 1 IDiag 1:
FoFJK: IHMeth= 1 ICntrl= 0 DoSepK=F KAlg= 0 I1Cent= 0 FoldK=F
IRaf= 680000000 NMat= 1 IRICut= 1 DoRegI=T DoRafI=F ISym2E= 0.
FoFCou: FMM=T IPFlag= 0 FMFlag= 100000 FMFlg1= 2001
NFxFlg= 0 DoJE=F BraDBF=F KetDBF=F FulRan=T
wScrn= 0.000000 ICntrl= 0 IOpCl= 0 I1Cent= 0 NGrid= 0
NMat0= 1 NMatS0= 1 NMatT0= 0 NMatD0= 1 NMtDS0= 0 NMtDT0= 0
Symmetry not used in FoFCou.
FMM levels: 10 Number of levels for PrismC: 9
Inv3: Mode=1 IEnd= 70538403.
Iteration 1 A*A^-1 deviation from unit magnitude is 6.99D-15 for 4829.
Iteration 1 A*A^-1 deviation from orthogonality is 7.34D-15 for 4824 4356.
Iteration 1 A^-1*A deviation from unit magnitude is 6.88D-15 for 4829.
Iteration 1 A^-1*A deviation from orthogonality is 3.41D-12 for 3877 3869.
E= -1789.45208820678
DIIS: error= 3.11D-02 at cycle 1 NSaved= 1.
NSaved= 1 IEnMin= 1 EnMin= -1789.45208820678 IErMin= 1 ErrMin= 3.11D-02
ErrMax= 3.11D-02 0.00D+00 EMaxC= 1.00D-01 BMatC= 1.10D+00 BMatP= 1.10D+00
IDIUse=3 WtCom= 6.89D-01 WtEn= 3.11D-01
Coeff-Com: 0.100D+01
Coeff-En: 0.100D+01
Coeff: 0.100D+01
Gap= 0.075 Goal= None Shift= 0.000
GapD= 0.075 DampG=0.500 DampE=0.500 DampFc=0.2500 IDamp=-1.
Damping current iteration by 2.50D-01
RMSDP=1.99D-03 MaxDP=1.41D-01 OVMax= 1.68D-01
Cycle 2 Pass 1 IDiag 1:
RMSU= 4.94D-04 CP: 9.89D-01
E= -1789.80518148535 Delta-E= -0.353093278574 Rises=F Damp=T
DIIS: error= 1.72D-02 at cycle 2 NSaved= 2.
NSaved= 2 IEnMin= 2 EnMin= -1789.80518148535 IErMin= 2 ErrMin= 1.72D-02
ErrMax= 1.72D-02 0.00D+00 EMaxC= 1.00D-01 BMatC= 3.28D-01 BMatP= 1.10D+00
IDIUse=3 WtCom= 8.28D-01 WtEn= 1.72D-01
Coeff-Com: -0.102D+01 0.202D+01
Coeff-En: 0.000D+00 0.100D+01
Coeff: -0.845D+00 0.185D+01
Gap= 0.096 Goal= None Shift= 0.000
RMSDP=6.88D-04 MaxDP=3.74D-02 DE=-3.53D-01 OVMax= 1.21D-01
Cycle 3 Pass 1 IDiag 1:
RMSU= 4.84D-04 CP: 9.73D-01 1.97D+00
E= -1790.40617028469 Delta-E= -0.600988799338 Rises=F Damp=F
DIIS: error= 8.34D-03 at cycle 3 NSaved= 3.
NSaved= 3 IEnMin= 3 EnMin= -1790.40617028469 IErMin= 3 ErrMin= 8.34D-03
ErrMax= 8.34D-03 0.00D+00 EMaxC= 1.00D-01 BMatC= 3.90D-02 BMatP= 3.28D-01
IDIUse=3 WtCom= 9.17D-01 WtEn= 8.34D-02
Coeff-Com: -0.447D+00 0.870D+00 0.577D+00
Coeff-En: 0.000D+00 0.000D+00 0.100D+01
Coeff: -0.410D+00 0.797D+00 0.612D+00
Gap= 0.092 Goal= None Shift= 0.000
RMSDP=3.38D-04 MaxDP=1.93D-02 DE=-6.01D-01 OVMax= 6.69D-02
Cycle 4 Pass 1 IDiag 1:
RMSU= 2.36D-04 CP: 9.76D-01 1.97D+00 5.02D-01
E= -1790.42597459443 Delta-E= -0.019804309734 Rises=F Damp=F
DIIS: error= 5.19D-03 at cycle 4 NSaved= 4.
NSaved= 4 IEnMin= 4 EnMin= -1790.42597459443 IErMin= 4 ErrMin= 5.19D-03
ErrMax= 5.19D-03 0.00D+00 EMaxC= 1.00D-01 BMatC= 1.92D-02 BMatP= 3.90D-02
IDIUse=3 WtCom= 9.48D-01 WtEn= 5.19D-02
Coeff-Com: -0.101D+00 0.195D+00 0.409D+00 0.497D+00
Coeff-En: 0.000D+00 0.000D+00 0.360D+00 0.640D+00
Coeff: -0.957D-01 0.185D+00 0.406D+00 0.505D+00
Gap= 0.089 Goal= None Shift= 0.000
RMSDP=1.55D-04 MaxDP=9.93D-03 DE=-1.98D-02 OVMax= 3.54D-02
Cycle 5 Pass 1 IDiag 1:
RMSU= 6.24D-05 CP: 9.75D-01 1.96D+00 6.75D-01 5.18D-01
E= -1790.44455368729 Delta-E= -0.018579092864 Rises=F Damp=F
DIIS: error= 8.95D-04 at cycle 5 NSaved= 5.
NSaved= 5 IEnMin= 5 EnMin= -1790.44455368729 IErMin= 5 ErrMin= 8.95D-04
ErrMax= 8.95D-04 0.00D+00 EMaxC= 1.00D-01 BMatC= 9.85D-04 BMatP= 1.92D-02
IDIUse=3 WtCom= 9.91D-01 WtEn= 8.95D-03
Coeff-Com: -0.209D-01 0.401D-01 0.184D+00 0.282D+00 0.515D+00
Coeff-En: 0.000D+00 0.000D+00 0.000D+00 0.000D+00 0.100D+01
Coeff: -0.207D-01 0.397D-01 0.183D+00 0.279D+00 0.519D+00
Gap= 0.090 Goal= None Shift= 0.000
RMSDP=3.60D-05 MaxDP=2.96D-03 DE=-1.86D-02 OVMax= 7.57D-03
Cycle 6 Pass 1 IDiag 1:
RMSU= 2.47D-05 CP: 9.75D-01 1.95D+00 6.80D-01 5.52D-01 6.09D-01
E= -1790.44536223078 Delta-E= -0.000808543487 Rises=F Damp=F
DIIS: error= 2.25D-04 at cycle 6 NSaved= 6.
NSaved= 6 IEnMin= 6 EnMin= -1790.44536223078 IErMin= 6 ErrMin= 2.25D-04
ErrMax= 2.25D-04 0.00D+00 EMaxC= 1.00D-01 BMatC= 9.80D-05 BMatP= 9.85D-04
IDIUse=3 WtCom= 9.98D-01 WtEn= 2.25D-03
Coeff-Com: -0.941D-03 0.149D-02 0.563D-01 0.989D-01 0.292D+00 0.552D+00
Coeff-En: 0.000D+00 0.000D+00 0.000D+00 0.000D+00 0.559D-01 0.944D+00
Coeff: -0.939D-03 0.148D-02 0.561D-01 0.987D-01 0.292D+00 0.553D+00
Gap= 0.090 Goal= None Shift= 0.000
RMSDP=1.27D-05 MaxDP=7.45D-04 DE=-8.09D-04 OVMax= 2.54D-03
Cycle 7 Pass 1 IDiag 1:
RMSU= 6.88D-06 CP: 9.75D-01 1.96D+00 6.84D-01 5.49D-01 6.78D-01
CP: 6.22D-01
E= -1790.44544571745 Delta-E= -0.000083486676 Rises=F Damp=F
DIIS: error= 1.06D-04 at cycle 7 NSaved= 7.
NSaved= 7 IEnMin= 7 EnMin= -1790.44544571745 IErMin= 7 ErrMin= 1.06D-04
ErrMax= 1.06D-04 0.00D+00 EMaxC= 1.00D-01 BMatC= 8.68D-06 BMatP= 9.80D-05
IDIUse=3 WtCom= 9.99D-01 WtEn= 1.06D-03
Coeff-Com: 0.452D-03-0.106D-02 0.215D-01 0.405D-01 0.139D+00 0.326D+00
Coeff-Com: 0.473D+00
Coeff-En: 0.000D+00 0.000D+00 0.000D+00 0.000D+00 0.000D+00 0.212D-01
Coeff-En: 0.979D+00
Coeff: 0.452D-03-0.106D-02 0.215D-01 0.405D-01 0.139D+00 0.326D+00
Coeff: 0.473D+00
Gap= 0.090 Goal= None Shift= 0.000
RMSDP=3.81D-06 MaxDP=2.13D-04 DE=-8.35D-05 OVMax= 7.14D-04
Cycle 8 Pass 1 IDiag 1:
RMSU= 2.31D-06 CP: 9.75D-01 1.96D+00 6.83D-01 5.54D-01 6.70D-01
CP: 6.43D-01 6.06D-01
E= -1790.44545444168 Delta-E= -0.000008724232 Rises=F Damp=F
DIIS: error= 3.15D-05 at cycle 8 NSaved= 8.
NSaved= 8 IEnMin= 8 EnMin= -1790.44545444168 IErMin= 8 ErrMin= 3.15D-05
ErrMax= 3.15D-05 0.00D+00 EMaxC= 1.00D-01 BMatC= 7.18D-07 BMatP= 8.68D-06
IDIUse=1 WtCom= 1.00D+00 WtEn= 0.00D+00
Coeff-Com: 0.457D-03-0.884D-03 0.500D-02 0.103D-01 0.416D-01 0.112D+00
Coeff-Com: 0.261D+00 0.571D+00
Coeff: 0.457D-03-0.884D-03 0.500D-02 0.103D-01 0.416D-01 0.112D+00
Coeff: 0.261D+00 0.571D+00
Gap= 0.090 Goal= None Shift= 0.000
RMSDP=1.48D-06 MaxDP=1.04D-04 DE=-8.72D-06 OVMax= 2.27D-04
Cycle 9 Pass 1 IDiag 1:
RMSU= 8.02D-07 CP: 9.75D-01 1.96D+00 6.83D-01 5.55D-01 6.74D-01
CP: 6.53D-01 6.32D-01 5.28D-01
E= -1790.44545504030 Delta-E= -0.000000598619 Rises=F Damp=F
DIIS: error= 1.03D-05 at cycle 9 NSaved= 9.
NSaved= 9 IEnMin= 9 EnMin= -1790.44545504030 IErMin= 9 ErrMin= 1.03D-05
ErrMax= 1.03D-05 0.00D+00 EMaxC= 1.00D-01 BMatC= 1.32D-07 BMatP= 7.18D-07
IDIUse=1 WtCom= 1.00D+00 WtEn= 0.00D+00
Coeff-Com: 0.214D-03-0.390D-03-0.187D-04 0.323D-03 0.547D-02 0.199D-01
Coeff-Com: 0.881D-01 0.346D+00 0.541D+00
Coeff: 0.214D-03-0.390D-03-0.187D-04 0.323D-03 0.547D-02 0.199D-01
Coeff: 0.881D-01 0.346D+00 0.541D+00
Gap= 0.090 Goal= None Shift= 0.000
RMSDP=4.94D-07 MaxDP=3.07D-05 DE=-5.99D-07 OVMax= 6.06D-05
Cycle 10 Pass 1 IDiag 1:
RMSU= 2.04D-07 CP: 9.75D-01 1.96D+00 6.83D-01 5.54D-01 6.74D-01
CP: 6.51D-01 6.43D-01 6.59D-01 6.46D-01
E= -1790.44545516143 Delta-E= -0.000000121126 Rises=F Damp=F
DIIS: error= 3.01D-06 at cycle 10 NSaved= 10.
NSaved=10 IEnMin=10 EnMin= -1790.44545516143 IErMin=10 ErrMin= 3.01D-06
ErrMax= 3.01D-06 0.00D+00 EMaxC= 1.00D-01 BMatC= 6.31D-09 BMatP= 1.32D-07
IDIUse=1 WtCom= 1.00D+00 WtEn= 0.00D+00
Coeff-Com: 0.616D-04-0.108D-03-0.309D-03-0.561D-03-0.675D-04 0.182D-02
Coeff-Com: 0.246D-01 0.126D+00 0.256D+00 0.592D+00
Coeff: 0.616D-04-0.108D-03-0.309D-03-0.561D-03-0.675D-04 0.182D-02
Coeff: 0.246D-01 0.126D+00 0.256D+00 0.592D+00
Gap= 0.090 Goal= None Shift= 0.000
RMSDP=9.38D-08 MaxDP=8.97D-06 DE=-1.21D-07 OVMax= 2.31D-05
Cycle 11 Pass 1 IDiag 1:
RMSU= 6.61D-08 CP: 9.75D-01 1.96D+00 6.83D-01 5.54D-01 6.74D-01
CP: 6.52D-01 6.46D-01 6.64D-01 6.73D-01 7.57D-01
E= -1790.44545516711 Delta-E= -0.000000005683 Rises=F Damp=F
DIIS: error= 8.56D-07 at cycle 11 NSaved= 11.
NSaved=11 IEnMin=11 EnMin= -1790.44545516711 IErMin=11 ErrMin= 8.56D-07
ErrMax= 8.56D-07 0.00D+00 EMaxC= 1.00D-01 BMatC= 7.66D-10 BMatP= 6.31D-09
IDIUse=1 WtCom= 1.00D+00 WtEn= 0.00D+00
Coeff-Com: 0.517D-05-0.849D-05-0.162D-03-0.360D-03-0.639D-03-0.130D-02
Coeff-Com: 0.326D-02 0.258D-01 0.698D-01 0.302D+00 0.602D+00
Coeff: 0.517D-05-0.849D-05-0.162D-03-0.360D-03-0.639D-03-0.130D-02
Coeff: 0.326D-02 0.258D-01 0.698D-01 0.302D+00 0.602D+00
Gap= 0.090 Goal= None Shift= 0.000
RMSDP=3.20D-08 MaxDP=2.35D-06 DE=-5.68D-09 OVMax= 8.67D-06
Cycle 12 Pass 1 IDiag 1:
RMSU= 2.13D-08 CP: 9.75D-01 1.96D+00 6.83D-01 5.54D-01 6.74D-01
CP: 6.52D-01 6.47D-01 6.64D-01 6.83D-01 8.17D-01
CP: 7.58D-01
E= -1790.44545516780 Delta-E= -0.000000000689 Rises=F Damp=F
DIIS: error= 3.89D-07 at cycle 12 NSaved= 12.
NSaved=12 IEnMin=12 EnMin= -1790.44545516780 IErMin=12 ErrMin= 3.89D-07
ErrMax= 3.89D-07 0.00D+00 EMaxC= 1.00D-01 BMatC= 7.34D-11 BMatP= 7.66D-10
IDIUse=1 WtCom= 1.00D+00 WtEn= 0.00D+00
Coeff-Com: -0.339D-05 0.586D-05-0.535D-04-0.138D-03-0.318D-03-0.842D-03
Coeff-Com: -0.604D-03 0.907D-03 0.120D-01 0.104D+00 0.304D+00 0.581D+00
Coeff: -0.339D-05 0.586D-05-0.535D-04-0.138D-03-0.318D-03-0.842D-03
Coeff: -0.604D-03 0.907D-03 0.120D-01 0.104D+00 0.304D+00 0.581D+00
Gap= 0.090 Goal= None Shift= 0.000
RMSDP=1.20D-08 MaxDP=1.04D-06 DE=-6.89D-10 OVMax= 3.01D-06
Cycle 13 Pass 1 IDiag 1:
RMSU= 8.12D-09 CP: 9.75D-01 1.96D+00 6.83D-01 5.54D-01 6.74D-01
CP: 6.52D-01 6.47D-01 6.64D-01 6.85D-01 8.27D-01
CP: 8.26D-01 7.33D-01
E= -1790.44545516797 Delta-E= -0.000000000168 Rises=F Damp=F
DIIS: error= 7.21D-08 at cycle 13 NSaved= 13.
NSaved=13 IEnMin=13 EnMin= -1790.44545516797 IErMin=13 ErrMin= 7.21D-08
ErrMax= 7.21D-08 0.00D+00 EMaxC= 1.00D-01 BMatC= 1.09D-11 BMatP= 7.34D-11
IDIUse=1 WtCom= 1.00D+00 WtEn= 0.00D+00
Coeff-Com: -0.266D-05 0.449D-05-0.688D-05-0.262D-04-0.838D-04-0.268D-03
Coeff-Com: -0.778D-03-0.330D-02-0.356D-02 0.129D-01 0.729D-01 0.314D+00
Coeff-Com: 0.608D+00
Coeff: -0.266D-05 0.449D-05-0.688D-05-0.262D-04-0.838D-04-0.268D-03
Coeff: -0.778D-03-0.330D-02-0.356D-02 0.129D-01 0.729D-01 0.314D+00
Coeff: 0.608D+00
Gap= 0.090 Goal= None Shift= 0.000
RMSDP=4.39D-09 MaxDP=2.58D-07 DE=-1.68D-10 OVMax= 1.48D-06
Error on total polarization charges = 0.01954
SCF Done: E(RB3LYP) = -1790.44545517 A.U. after 13 cycles
NFock= 13 Conv=0.44D-08 -V/T= 2.0042
KE= 1.782869125910D+03 PE=-1.454303477082D+04 EE= 5.780958081311D+03
Leave Link 502 at Sat May 27 23:32:15 2023, MaxMem= 4294967296 cpu: 6180.2
(Enter /public/apps/gs/g09/l601.exe)
Copying SCF densities to generalized density rwf, IOpCl= 0 IROHF=0.
**********************************************************************
Population analysis using the SCF density.
**********************************************************************
Alpha occ. eigenvalues -- -19.11559 -19.11162 -14.34919 -14.34725 -10.23312
Alpha occ. eigenvalues -- -10.23308 -10.23155 -10.22709 -10.22325 -10.22070
Alpha occ. eigenvalues -- -10.22066 -10.21746 -10.20718 -10.20666 -10.20616
Alpha occ. eigenvalues -- -10.20543 -10.20480 -10.20325 -10.20317 -10.18548
Alpha occ. eigenvalues -- -10.18424 -10.17964 -10.17608 -10.17590 -10.17586
Alpha occ. eigenvalues -- -10.17405 -10.17342 -10.17242 -10.17235 -10.17030
Alpha occ. eigenvalues -- -10.16963 -10.16840 -10.16707 -10.16693 -10.16395
Alpha occ. eigenvalues -- -10.16299 -10.16118 -10.16026 -10.15974 -10.15853
Alpha occ. eigenvalues -- -10.15737 -10.15628 -10.15466 -6.81458 -1.05235
Alpha occ. eigenvalues -- -1.01762 -0.99515 -0.98035 -0.89912 -0.87528
Alpha occ. eigenvalues -- -0.86164 -0.84411 -0.82165 -0.81362 -0.81246
Alpha occ. eigenvalues -- -0.80734 -0.78951 -0.78206 -0.78149 -0.77375
Alpha occ. eigenvalues -- -0.75053 -0.74317 -0.73279 -0.72785 -0.72497
Alpha occ. eigenvalues -- -0.71969 -0.71879 -0.69694 -0.68546 -0.65098
Alpha occ. eigenvalues -- -0.64341 -0.64106 -0.62253 -0.61498 -0.61404
Alpha occ. eigenvalues -- -0.60209 -0.60085 -0.59689 -0.57380 -0.56933
Alpha occ. eigenvalues -- -0.56621 -0.56180 -0.54478 -0.54140 -0.52522
Alpha occ. eigenvalues -- -0.52186 -0.51685 -0.51158 -0.49664 -0.49220
Alpha occ. eigenvalues -- -0.49108 -0.48443 -0.48290 -0.46563 -0.45951
Alpha occ. eigenvalues -- -0.45743 -0.45521 -0.45166 -0.44916 -0.44550
Alpha occ. eigenvalues -- -0.44398 -0.44314 -0.44044 -0.43497 -0.43426
Alpha occ. eigenvalues -- -0.43052 -0.42840 -0.42559 -0.41945 -0.41728
Alpha occ. eigenvalues -- -0.41326 -0.41089 -0.41030 -0.40885 -0.40582
Alpha occ. eigenvalues -- -0.40208 -0.40099 -0.39930 -0.39747 -0.39396
Alpha occ. eigenvalues -- -0.38633 -0.38309 -0.38059 -0.37929 -0.37843
Alpha occ. eigenvalues -- -0.37418 -0.36789 -0.36563 -0.36407 -0.34951
Alpha occ. eigenvalues -- -0.34359 -0.33933 -0.33385 -0.32874 -0.31624
Alpha occ. eigenvalues -- -0.30610 -0.30087 -0.29661 -0.29024 -0.28594
Alpha occ. eigenvalues -- -0.28471 -0.28370 -0.26889 -0.26583 -0.25975
Alpha occ. eigenvalues -- -0.23509 -0.22733 -0.21650 -0.21202 -0.19579
Alpha virt. eigenvalues -- -0.10602 -0.04670 -0.04510 -0.04460 -0.03079
Alpha virt. eigenvalues -- -0.00739 -0.00194 0.01206 0.01668 0.02509
Alpha virt. eigenvalues -- 0.03378 0.04036 0.04531 0.04688 0.05034
Alpha virt. eigenvalues -- 0.05359 0.05960 0.06253 0.06663 0.07336
Alpha virt. eigenvalues -- 0.07500 0.08042 0.08382 0.08620 0.08751
Alpha virt. eigenvalues -- 0.09004 0.09326 0.09720 0.10087 0.10270
Alpha virt. eigenvalues -- 0.10356 0.10757 0.11011 0.11713 0.12262
Alpha virt. eigenvalues -- 0.12345 0.12689 0.13228 0.13454 0.13630
Alpha virt. eigenvalues -- 0.14031 0.14386 0.14952 0.15251 0.15778
Alpha virt. eigenvalues -- 0.16394 0.16877 0.17385 0.17465 0.17504
Alpha virt. eigenvalues -- 0.18229 0.18917 0.19119 0.19609 0.19979
Alpha virt. eigenvalues -- 0.20782 0.21006 0.21104 0.21974 0.22870
Alpha virt. eigenvalues -- 0.23427 0.23498 0.24384 0.24663 0.24911
Alpha virt. eigenvalues -- 0.25265 0.25961 0.26497 0.26790 0.26826
Alpha virt. eigenvalues -- 0.27050 0.27168 0.27484 0.27862 0.28620
Alpha virt. eigenvalues -- 0.28860 0.29189 0.29316 0.29509 0.29602
Alpha virt. eigenvalues -- 0.29915 0.30248 0.30472 0.30810 0.31072
Alpha virt. eigenvalues -- 0.31357 0.31904 0.32151 0.32521 0.32962
Alpha virt. eigenvalues -- 0.33455 0.33873 0.34296 0.34556 0.34695
Alpha virt. eigenvalues -- 0.35387 0.36192 0.36800 0.37064 0.37375
Alpha virt. eigenvalues -- 0.37880 0.38052 0.38416 0.38716 0.38908
Alpha virt. eigenvalues -- 0.39092 0.39267 0.39335 0.39817 0.40122
Alpha virt. eigenvalues -- 0.40314 0.40463 0.40824 0.41340 0.41493
Alpha virt. eigenvalues -- 0.41689 0.41760 0.42271 0.42530 0.42632
Alpha virt. eigenvalues -- 0.43014 0.43476 0.43688 0.44086 0.44289
Alpha virt. eigenvalues -- 0.44621 0.44792 0.45112 0.45398 0.45627
Alpha virt. eigenvalues -- 0.45761 0.45885 0.46085 0.46465 0.46705
Alpha virt. eigenvalues -- 0.46842 0.46968 0.47404 0.47726 0.48148
Alpha virt. eigenvalues -- 0.48418 0.48670 0.48899 0.49395 0.49765
Alpha virt. eigenvalues -- 0.50055 0.50708 0.50929 0.51375 0.51790
Alpha virt. eigenvalues -- 0.52180 0.52283 0.52449 0.52778 0.52938
Alpha virt. eigenvalues -- 0.53829 0.54094 0.54550 0.54720 0.55073
Alpha virt. eigenvalues -- 0.55214 0.55519 0.55752 0.56451 0.56587
Alpha virt. eigenvalues -- 0.56884 0.57025 0.57275 0.57420 0.57803
Alpha virt. eigenvalues -- 0.57907 0.58148 0.58641 0.59392 0.59685
Alpha virt. eigenvalues -- 0.59894 0.60389 0.60836 0.61025 0.61276
Alpha virt. eigenvalues -- 0.61420 0.61628 0.62102 0.62314 0.62497
Alpha virt. eigenvalues -- 0.62821 0.62992 0.63289 0.63476 0.63623
Alpha virt. eigenvalues -- 0.63937 0.64413 0.64555 0.64792 0.65314
Alpha virt. eigenvalues -- 0.65723 0.65956 0.66638 0.67111 0.67468
Alpha virt. eigenvalues -- 0.67757 0.67906 0.68262 0.68370 0.68480
Alpha virt. eigenvalues -- 0.68829 0.69325 0.69797 0.70322 0.70665
Alpha virt. eigenvalues -- 0.71385 0.71849 0.71937 0.72530 0.72663
Alpha virt. eigenvalues -- 0.72961 0.73148 0.73487 0.73722 0.74052
Alpha virt. eigenvalues -- 0.74831 0.75285 0.75394 0.75680 0.76040
Alpha virt. eigenvalues -- 0.76628 0.77030 0.77510 0.77980 0.78785
Alpha virt. eigenvalues -- 0.79020 0.79697 0.79894 0.79971 0.80767
Alpha virt. eigenvalues -- 0.81393 0.81617 0.81912 0.82239 0.82392
Alpha virt. eigenvalues -- 0.82700 0.83034 0.84140 0.84339 0.84548
Alpha virt. eigenvalues -- 0.85073 0.85582 0.86133 0.86835 0.86999
Alpha virt. eigenvalues -- 0.87346 0.87923 0.88530 0.88573 0.89481
Alpha virt. eigenvalues -- 0.90028 0.90785 0.91031 0.91391 0.92190
Alpha virt. eigenvalues -- 0.92343 0.92968 0.93485 0.94223 0.94829
Alpha virt. eigenvalues -- 0.95690 0.96368 0.97120 0.97660 0.97688
Alpha virt. eigenvalues -- 0.98101 0.98230 0.98961 0.99033 0.99615
Alpha virt. eigenvalues -- 1.00096 1.00796 1.01155 1.01825 1.02125
Alpha virt. eigenvalues -- 1.02509 1.02697 1.03137 1.03872 1.03938
Alpha virt. eigenvalues -- 1.04442 1.04784 1.05265 1.06062 1.06400
Alpha virt. eigenvalues -- 1.06709 1.07563 1.07948 1.08646 1.08725
Alpha virt. eigenvalues -- 1.09264 1.09718 1.10212 1.10683 1.10919
Alpha virt. eigenvalues -- 1.11362 1.11611 1.11836 1.12433 1.12565
Alpha virt. eigenvalues -- 1.13361 1.13779 1.14474 1.14956 1.15506
Alpha virt. eigenvalues -- 1.16032 1.16920 1.17388 1.18078 1.18704
Alpha virt. eigenvalues -- 1.19158 1.19512 1.20653 1.21166 1.22026
Alpha virt. eigenvalues -- 1.22729 1.23225 1.23825 1.24866 1.25627
Alpha virt. eigenvalues -- 1.26418 1.28342 1.29633 1.29779 1.31175
Alpha virt. eigenvalues -- 1.31379 1.32044 1.32506 1.32977 1.33939
Alpha virt. eigenvalues -- 1.33954 1.34224 1.34596 1.36863 1.37135
Alpha virt. eigenvalues -- 1.37697 1.38726 1.39027 1.39651 1.40226
Alpha virt. eigenvalues -- 1.40624 1.41136 1.41556 1.42227 1.42738
Alpha virt. eigenvalues -- 1.43101 1.43775 1.44023 1.44760 1.45194
Alpha virt. eigenvalues -- 1.45401 1.45971 1.46108 1.46384 1.46741
Alpha virt. eigenvalues -- 1.47358 1.47915 1.48533 1.48661 1.48729
Alpha virt. eigenvalues -- 1.49043 1.49700 1.50007 1.50498 1.51170
Alpha virt. eigenvalues -- 1.51439 1.51794 1.52122 1.52266 1.52581
Alpha virt. eigenvalues -- 1.53205 1.53410 1.53723 1.54352 1.54669
Alpha virt. eigenvalues -- 1.55279 1.55724 1.55761 1.55894 1.56202
Alpha virt. eigenvalues -- 1.56351 1.56665 1.57353 1.57357 1.57678
Alpha virt. eigenvalues -- 1.57894 1.58441 1.58942 1.59308 1.59465
Alpha virt. eigenvalues -- 1.59957 1.60471 1.60845 1.61006 1.61704
Alpha virt. eigenvalues -- 1.62084 1.62510 1.63139 1.63660 1.64018
Alpha virt. eigenvalues -- 1.64202 1.64757 1.65468 1.65969 1.66604
Alpha virt. eigenvalues -- 1.66706 1.67578 1.68316 1.68449 1.68665
Alpha virt. eigenvalues -- 1.69063 1.69894 1.70244 1.70734 1.71055
Alpha virt. eigenvalues -- 1.71485 1.71627 1.71955 1.72268 1.72820
Alpha virt. eigenvalues -- 1.73179 1.73838 1.74372 1.74759 1.74933
Alpha virt. eigenvalues -- 1.75167 1.75615 1.75867 1.76213 1.76275
Alpha virt. eigenvalues -- 1.76714 1.77670 1.78126 1.78450 1.78956
Alpha virt. eigenvalues -- 1.79248 1.79931 1.80339 1.80799 1.81556
Alpha virt. eigenvalues -- 1.81810 1.82407 1.82962 1.84278 1.84406
Alpha virt. eigenvalues -- 1.85372 1.86162 1.86282 1.86890 1.87557
Alpha virt. eigenvalues -- 1.87761 1.88085 1.88331 1.88885 1.89127
Alpha virt. eigenvalues -- 1.89380 1.89859 1.90053 1.90339 1.90905
Alpha virt. eigenvalues -- 1.91681 1.92146 1.92488 1.92794 1.93302
Alpha virt. eigenvalues -- 1.94104 1.94221 1.94581 1.94714 1.95012
Alpha virt. eigenvalues -- 1.95369 1.95532 1.96616 1.96790 1.97354
Alpha virt. eigenvalues -- 1.97796 1.98217 1.98620 1.98877 1.99275
Alpha virt. eigenvalues -- 1.99856 2.00278 2.01094 2.01315 2.01950
Alpha virt. eigenvalues -- 2.02491 2.02641 2.02874 2.03641 2.03704
Alpha virt. eigenvalues -- 2.04664 2.05354 2.05785 2.06337 2.06683
Alpha virt. eigenvalues -- 2.07258 2.07500 2.08467 2.08846 2.09943
Alpha virt. eigenvalues -- 2.10591 2.10890 2.11251 2.11842 2.12704
Alpha virt. eigenvalues -- 2.13268 2.13685 2.14273 2.15330 2.16025
Alpha virt. eigenvalues -- 2.16563 2.17005 2.18385 2.19716 2.20669
Alpha virt. eigenvalues -- 2.21035 2.22628 2.22775 2.23031 2.23464
Alpha virt. eigenvalues -- 2.24745 2.25173 2.25822 2.27158 2.28314
Alpha virt. eigenvalues -- 2.28652 2.29767 2.31084 2.31762 2.31963
Alpha virt. eigenvalues -- 2.32278 2.32964 2.33258 2.33819 2.34519
Alpha virt. eigenvalues -- 2.35177 2.35243 2.36150 2.36734 2.37302
Alpha virt. eigenvalues -- 2.37820 2.38227 2.38689 2.39392 2.39571
Alpha virt. eigenvalues -- 2.40015 2.40505 2.41294 2.41565 2.42151
Alpha virt. eigenvalues -- 2.42402 2.43142 2.43950 2.44626 2.45226
Alpha virt. eigenvalues -- 2.45335 2.46213 2.46854 2.48120 2.48625
Alpha virt. eigenvalues -- 2.49154 2.49683 2.50565 2.51010 2.51423
Alpha virt. eigenvalues -- 2.52532 2.52941 2.53219 2.54190 2.55657
Alpha virt. eigenvalues -- 2.55851 2.56102 2.56787 2.57307 2.57554
Alpha virt. eigenvalues -- 2.57942 2.58588 2.59671 2.59820 2.60357
Alpha virt. eigenvalues -- 2.60842 2.61534 2.61674 2.62321 2.62708
Alpha virt. eigenvalues -- 2.62741 2.62933 2.63182 2.64141 2.64432
Alpha virt. eigenvalues -- 2.64630 2.64944 2.65380 2.65800 2.66120
Alpha virt. eigenvalues -- 2.66522 2.67092 2.67272 2.67844 2.68352
Alpha virt. eigenvalues -- 2.68776 2.69005 2.69193 2.69644 2.69977
Alpha virt. eigenvalues -- 2.70250 2.70573 2.71107 2.71807 2.72203
Alpha virt. eigenvalues -- 2.72250 2.72769 2.73219 2.73750 2.74208
Alpha virt. eigenvalues -- 2.74565 2.75079 2.75546 2.75900 2.76763
Alpha virt. eigenvalues -- 2.77048 2.77831 2.78244 2.78938 2.79759
Alpha virt. eigenvalues -- 2.80559 2.80970 2.81529 2.81861 2.82811
Alpha virt. eigenvalues -- 2.82911 2.83727 2.84021 2.84895 2.84948
Alpha virt. eigenvalues -- 2.85798 2.87069 2.87850 2.88650 2.88744
Alpha virt. eigenvalues -- 2.89493 2.89931 2.90724 2.91299 2.92132
Alpha virt. eigenvalues -- 2.92268 2.93325 2.93847 2.94627 2.95129
Alpha virt. eigenvalues -- 2.95710 2.96364 2.97362 2.98357 2.99862
Alpha virt. eigenvalues -- 3.00786 3.01412 3.01740 3.02821 3.03730
Alpha virt. eigenvalues -- 3.04633 3.04914 3.05504 3.08004 3.08944
Alpha virt. eigenvalues -- 3.09770 3.10254 3.10490 3.11281 3.12592
Alpha virt. eigenvalues -- 3.13524 3.14026 3.15378 3.17269 3.18892
Alpha virt. eigenvalues -- 3.19403 3.20794 3.22032 3.22799 3.23544
Alpha virt. eigenvalues -- 3.24120 3.24978 3.27100 3.27909 3.29014
Alpha virt. eigenvalues -- 3.30184 3.31058 3.33716 3.34068 3.34131
Alpha virt. eigenvalues -- 3.36103 3.36277 3.36767 3.38608 3.39306
Alpha virt. eigenvalues -- 3.39686 3.40255 3.41289 3.41799 3.42293
Alpha virt. eigenvalues -- 3.42440 3.43494 3.44434 3.46269 3.47152
Alpha virt. eigenvalues -- 3.47787 3.48411 3.50619 3.50704 3.51679
Alpha virt. eigenvalues -- 3.53529 3.54446 3.55638 3.55957 3.59352
Alpha virt. eigenvalues -- 3.61246 3.61576 3.64967 3.65357 3.66169
Alpha virt. eigenvalues -- 3.69000 3.72602 3.74838 3.76795 3.77204
Alpha virt. eigenvalues -- 3.78169 3.79995 3.80554 3.82529 3.83341
Alpha virt. eigenvalues -- 3.84909 3.85289 3.85412 3.86475 3.92193
Alpha virt. eigenvalues -- 3.93461 3.94426 3.94739 3.96091 3.96572
Alpha virt. eigenvalues -- 3.98452 3.99635 4.04052 4.04635 4.04891
Alpha virt. eigenvalues -- 4.05574 4.06687 4.07711 4.09067 4.10649
Alpha virt. eigenvalues -- 4.12780 4.18217 4.20215 4.20836 4.27207
Alpha virt. eigenvalues -- 4.27923 4.29941 4.33540 4.35770 4.37524
Alpha virt. eigenvalues -- 4.38699 4.44301 4.54703 4.60008 4.62521
Alpha virt. eigenvalues -- 4.80638 4.82382 4.83152 4.83742 4.85225
Alpha virt. eigenvalues -- 4.87556 5.11892 5.14056 5.15898 5.19639
Alpha virt. eigenvalues -- 5.23149 5.33489 5.75435 5.78375 14.62821
Alpha virt. eigenvalues -- 23.44923 23.54077 23.58561 23.62607 23.71196
Alpha virt. eigenvalues -- 23.76658 23.79468 23.79960 23.87823 23.87987
Alpha virt. eigenvalues -- 23.89607 23.90318 23.91226 23.91978 23.93142
Alpha virt. eigenvalues -- 23.93458 23.93560 23.95287 23.95564 23.95950
Alpha virt. eigenvalues -- 23.96695 23.97797 24.00943 24.01554 24.01583
Alpha virt. eigenvalues -- 24.02391 24.04458 24.07123 24.11573 24.11826
Alpha virt. eigenvalues -- 24.13696 24.13937 24.14061 24.14393 24.18846
Alpha virt. eigenvalues -- 24.19455 24.20364 24.20900 24.21700 35.57453
Alpha virt. eigenvalues -- 35.58652 49.99260 50.01718
Condensed to atoms (all electrons):
Mulliken charges:
1
1 C 0.161281
2 C 0.026845
3 C -0.068150
4 C 0.132982
5 C -0.122712
6 C -0.052959
7 C -0.045633
8 C -0.109891
9 C -0.103514
10 C -0.059521
11 C -0.063993
12 C -0.069960
13 C -0.071400
14 C -0.103922
15 B 0.578627
16 O -0.441426
17 O -0.420296
18 C -0.098569
19 C -0.070984
20 C -0.103701
21 C -0.102002
22 C -0.102705
23 C -0.076890
24 H 0.102502
25 H 0.103922
26 H 0.098225
27 H 0.101178
28 H 0.106502
29 H 0.120964
30 H 0.093569
31 H 0.125539
32 H 0.121219
33 H 0.118744
34 H 0.117962
35 H 0.116323
36 C -0.037482
37 C -0.100866
38 C 0.000413
39 N -0.448443
40 C -0.235925
41 N -0.427636
42 C -0.267204
43 C -0.236077
44 C -0.100694
45 C -0.103277
46 C -0.032373
47 C -0.248384
48 C -0.271191
49 C 0.244416
50 C 0.229889
51 C -0.129655
52 C -0.163109
53 C 0.157908
54 C 0.152709
55 C -0.161243
56 C -0.130864
57 H 0.110808
58 H 0.107953
59 H 0.127849
60 H 0.130422
61 H 0.119918
62 H 0.126541
63 H 0.166694
64 H 0.151049
65 H 0.117755
66 H 0.130757
67 H 0.127207
68 H 0.104208
69 H 0.112130
70 H 0.114362
71 H 0.148673
72 H 0.149002
73 H 0.128324
74 H 0.099606
75 H 0.097674
Sum of Mulliken charges = -0.00000
Mulliken charges with hydrogens summed into heavy atoms:
1
1 C 0.161281
2 C 0.026845
3 C -0.068150
4 C 0.132982
5 C -0.020209
6 C 0.050963
7 C -0.045633
8 C -0.109891
9 C -0.103514
10 C -0.059521
11 C 0.034232
12 C 0.031218
13 C 0.035102
14 C 0.017041
15 B 0.578627
16 O -0.441426
17 O -0.420296
18 C -0.005000
19 C 0.054555
20 C 0.017518
21 C 0.016741
22 C 0.015257
23 C 0.039433
36 C 0.073327
37 C 0.007087
38 C 0.000413
39 N -0.448443
40 C 0.142264
41 N -0.427636
42 C 0.177080
43 C 0.139642
44 C 0.003514
45 C 0.008853
46 C 0.081989
47 C -0.248384
48 C 0.154808
49 C 0.244416
50 C 0.229889
51 C -0.129655
52 C -0.063503
53 C 0.157908
54 C 0.152709
55 C -0.063569
56 C -0.130864
Electronic spatial extent (au): <R**2>= 23400.9585
Charge= -0.0000 electrons
Dipole moment (field-independent basis, Debye):
X= 1.6583 Y= -0.7239 Z= -0.5222 Tot= 1.8833
Quadrupole moment (field-independent basis, Debye-Ang):
XX= -209.3415 YY= -226.7621 ZZ= -250.9448
XY= -2.3636 XZ= 3.2334 YZ= -3.0486
Traceless Quadrupole moment (field-independent basis, Debye-Ang):
XX= 19.6746 YY= 2.2540 ZZ= -21.9286
XY= -2.3636 XZ= 3.2334 YZ= -3.0486
Octapole moment (field-independent basis, Debye-Ang**2):
XXX= 31.1347 YYY= 1.1698 ZZZ= -4.2360 XYY= -57.5645
XXY= 7.0080 XXZ= 6.4028 XZZ= 21.8448 YZZ= -6.7345
YYZ= -2.9230 XYZ= 5.3060
Hexadecapole moment (field-independent basis, Debye-Ang**3):
XXXX= -20765.7843 YYYY= -7035.8048 ZZZZ= -2057.8249 XXXY= -226.4443
XXXZ= -44.8759 YYYX= 112.5673 YYYZ= -56.1507 ZZZX= 36.4950
ZZZY= -37.3736 XXYY= -4725.1461 XXZZ= -4061.0105 YYZZ= -1513.2743
XXYZ= -76.7227 YYXZ= 68.7231 ZZXY= -60.2213
N-N= 5.188762108430D+03 E-N=-1.454303480419D+04 KE= 1.782869125910D+03
No NMR shielding tensors so no spin-rotation constants.
Leave Link 601 at Sat May 27 23:32:15 2023, MaxMem= 4294967296 cpu: 18.4
(Enter /public/apps/gs/g09/l701.exe)
Compute integral first derivatives.
... and contract with generalized density number 0.
R6Disp: Adding Grimme-D3(BJ) dispersion energy 1st derivatives to the gradient.
D1PCM: PCM CHGder 1st derivatives, ID1Alg=3 FixD1E=F DoIter=F DoCFld=F I1PDM=0.
GePol: Maximum number of non-zero 1st derivatives = 199
Leave Link 701 at Sat May 27 23:32:21 2023, MaxMem= 4294967296 cpu: 169.7
(Enter /public/apps/gs/g09/l702.exe)
L702 exits ... SP integral derivatives will be done elsewhere.
Leave Link 702 at Sat May 27 23:32:21 2023, MaxMem= 4294967296 cpu: 0.5
(Enter /public/apps/gs/g09/l703.exe)
Compute integral first derivatives, UseDBF=F ICtDFT= 0.
Integral derivatives from FoFJK, PRISM(SPDF).
Calling FoFJK, ICntrl= 2127 FMM=T ISym2X=0 I1Cent= 0 IOpClX= 0 NMat=1 NMatS=1 NMatT=0.
FoFJK: IHMeth= 1 ICntrl= 2127 DoSepK=F KAlg= 0 I1Cent= 0 FoldK=F
IRaf= 0 NMat= 1 IRICut= 1 DoRegI=T DoRafI=F ISym2E= 0.
FoFCou: FMM=T IPFlag= 0 FMFlag= 100000 FMFlg1= 2001
NFxFlg= 0 DoJE=F BraDBF=F KetDBF=F FulRan=T
wScrn= 0.000000 ICntrl= 2127 IOpCl= 0 I1Cent= 0 NGrid= 0
NMat0= 1 NMatS0= 1 NMatT0= 0 NMatD0= 1 NMtDS0= 0 NMtDT0= 0
Symmetry not used in FoFCou.
FMM levels: 10 Number of levels for PrismC: 9
Leave Link 703 at Sat May 27 23:32:58 2023, MaxMem= 4294967296 cpu: 1195.4
(Enter /public/apps/gs/g09/l716.exe)
Dipole = 6.52442758D-01-2.84804779D-01-2.05451247D-01
-------------------------------------------------------------------
Center Atomic Forces (Hartrees/Bohr)
Number Number X Y Z
-------------------------------------------------------------------
1 6 -0.004515787 0.001409587 0.000654184
2 6 0.001051685 0.000440697 -0.000531518
3 6 0.000830516 0.000150120 0.000086236
4 6 -0.002598251 -0.002326973 -0.000034194
5 6 0.000855899 -0.000509901 0.000449006
6 6 -0.000382967 0.000190279 0.000314929
7 6 0.000151585 -0.000239461 0.000052306
8 6 -0.000905827 0.000290619 0.000372206
9 6 -0.000304583 -0.000473532 -0.000152699
10 6 0.000151301 -0.000031988 0.000111571
11 6 -0.000331761 -0.000236743 -0.000267904
12 6 -0.000146356 -0.000239057 -0.000150328
13 6 -0.000183411 0.000294927 0.000031683
14 6 0.000156925 0.000188102 -0.000062644
15 5 -0.007074990 0.000293113 0.000139626
16 8 0.006279522 -0.002310725 0.000461892
17 8 0.004356849 0.002607376 -0.001158437
18 6 0.000272986 0.000637901 -0.000478364
19 6 0.000177789 0.000151891 -0.000124441
20 6 0.000016680 0.000129139 -0.000280219
21 6 0.000379563 -0.000142862 0.000119910
22 6 0.000105955 0.000099733 0.000087964
23 6 0.000428703 -0.000037155 -0.000149178
24 1 0.000020517 0.000093686 -0.000208951
25 1 -0.000165679 -0.000123299 -0.000015337
26 1 -0.000181614 -0.000090729 0.000123069
27 1 -0.000173795 -0.000008020 0.000078252
28 1 -0.000160684 -0.000183518 0.000076787
29 1 0.000161981 -0.000260429 -0.000120909
30 1 0.000175157 0.000005297 0.000231713
31 1 -0.000205896 -0.000084215 0.000123521
32 1 0.000123638 -0.000000210 0.000292223
33 1 -0.000032829 0.000283029 0.000063827
34 1 -0.000030084 0.000061200 -0.000292000
35 1 -0.000234161 -0.000057587 0.000027286
36 6 0.000361638 -0.000099671 0.000174053
37 6 -0.000028539 0.000004944 0.000102306
38 6 -0.001466889 -0.000480282 -0.000476209
39 7 0.001771254 -0.001716272 -0.000791372
40 6 0.000182223 0.000070934 0.000056873
41 7 0.002504189 0.001581256 0.000841532
42 6 0.000552205 0.000142095 -0.000311764
43 6 0.000196890 -0.000152888 -0.000070520
44 6 -0.000179225 0.000053781 -0.000028728
45 6 0.000088444 0.000014163 -0.000014372
46 6 0.000345324 0.000047103 -0.000006856
47 6 -0.000526942 0.000069076 -0.000058341
48 6 0.000453214 0.000084049 0.000332749
49 6 -0.000257787 0.000140285 0.000043417
50 6 0.000123561 0.000832108 0.000294470
51 6 -0.001383596 -0.001042107 -0.000780849
52 6 0.002672611 -0.000523171 0.000296303
53 6 -0.002269235 0.001890962 0.000574108
54 6 -0.002143979 -0.001161833 -0.000716352
55 6 0.002092139 -0.000046712 0.000168730
56 6 -0.001197372 0.000695083 0.000137828
57 1 -0.000188530 -0.000062806 0.000122815
58 1 0.000086442 0.000067523 -0.000237993
59 1 0.000180770 0.000009369 -0.000227555
60 1 0.000038932 -0.000210363 0.000189586
61 1 -0.000069601 -0.000078205 0.000017853
62 1 -0.000033946 -0.000080915 0.000068264
63 1 0.000039212 0.000113496 0.000149339
64 1 0.000046712 -0.000015750 0.000309792
65 1 -0.000054947 0.000124201 0.000085268
66 1 0.000108063 0.000012975 0.000250645
67 1 0.000218804 0.000125954 -0.000196860
68 1 0.000317527 -0.000073836 0.000077137
69 1 -0.000077930 -0.000086220 0.000165053
70 1 -0.000053933 0.000063881 -0.000191089
71 1 -0.000116648 -0.000282339 0.000010700
72 1 0.000040880 -0.000027124 -0.000316619
73 1 -0.000035446 0.000000114 -0.000009908
74 1 -0.000207149 -0.000005928 0.000078010
75 1 -0.000197913 0.000032777 0.000017491
-------------------------------------------------------------------
Cartesian Forces: Max 0.007074990 RMS 0.000989864
Leave Link 716 at Sat May 27 23:32:59 2023, MaxMem= 4294967296 cpu: 4.0
(Enter /public/apps/gs/g09/l103.exe)
GradGradGradGradGradGradGradGradGradGradGradGradGradGradGradGradGradGrad
Berny optimization.
FormGI is forming the generalized inverse of G from B-inverse, IUseBI=4.
Internal Forces: Max 0.003815145 RMS 0.000399007
Search for a local minimum.
Step number 1 out of a maximum of 450
All quantities printed in internal units (Hartrees-Bohrs-Radians)
RMS Force = .39901D-03 SwitMx=.10000D-02 MixMth= 2
Mixed Optimization -- En-DIIS/RFO-DIIS
Second derivative matrix not updated -- first step.
ITU= 0
Eigenvalues --- 0.00569 0.00803 0.00805 0.00887 0.00914
Eigenvalues --- 0.00923 0.01071 0.01243 0.01419 0.01427
Eigenvalues --- 0.01514 0.01515 0.01548 0.01598 0.01636
Eigenvalues --- 0.01714 0.01715 0.01741 0.01747 0.01752
Eigenvalues --- 0.01767 0.01784 0.01793 0.01802 0.01955
Eigenvalues --- 0.01971 0.01991 0.01995 0.02019 0.02033
Eigenvalues --- 0.02035 0.02042 0.02050 0.02065 0.02096
Eigenvalues --- 0.02110 0.02110 0.02116 0.02133 0.02133
Eigenvalues --- 0.02137 0.02142 0.02150 0.02164 0.02168
Eigenvalues --- 0.02169 0.02169 0.02170 0.02171 0.02175
Eigenvalues --- 0.02176 0.02180 0.02180 0.02182 0.02210
Eigenvalues --- 0.02213 0.02247 0.02272 0.02290 0.02296
Eigenvalues --- 0.02361 0.04398 0.06730 0.07149 0.07155
Eigenvalues --- 0.07208 0.07287 0.07331 0.07332 0.07463
Eigenvalues --- 0.07555 0.08075 0.11944 0.13041 0.15988
Eigenvalues --- 0.15989 0.15996 0.15997 0.15998 0.15998
Eigenvalues --- 0.15998 0.15999 0.15999 0.15999 0.15999
Eigenvalues --- 0.16000 0.16000 0.16000 0.16000 0.16000
Eigenvalues --- 0.16000 0.16000 0.16000 0.16000 0.16000
Eigenvalues --- 0.16000 0.16000 0.16000 0.16000 0.16000
Eigenvalues --- 0.16000 0.16000 0.16000 0.16000 0.16000
Eigenvalues --- 0.20500 0.21643 0.21998 0.21999 0.22000
Eigenvalues --- 0.22000 0.22378 0.22413 0.22674 0.22731
Eigenvalues --- 0.23483 0.23715 0.23740 0.23769 0.24008
Eigenvalues --- 0.24319 0.24338 0.24626 0.24652 0.24694
Eigenvalues --- 0.24804 0.24875 0.24878 0.24918 0.24930
Eigenvalues --- 0.24982 0.24988 0.24999 0.24999 0.25000
Eigenvalues --- 0.25000 0.26052 0.26488 0.32103 0.32676
Eigenvalues --- 0.32692 0.33355 0.33577 0.33652 0.34294
Eigenvalues --- 0.34566 0.34572 0.34581 0.34585 0.34639
Eigenvalues --- 0.34639 0.34676 0.34696 0.34700 0.34779
Eigenvalues --- 0.34800 0.35277 0.35431 0.35441 0.35486
Eigenvalues --- 0.35491 0.35518 0.35521 0.35524 0.35566
Eigenvalues --- 0.35567 0.35568 0.35571 0.35574 0.35574
Eigenvalues --- 0.35576 0.35595 0.35623 0.35826 0.35927
Eigenvalues --- 0.36027 0.36035 0.36537 0.36613 0.36637
Eigenvalues --- 0.38334 0.38493 0.38693 0.39232 0.40075
Eigenvalues --- 0.40141 0.40508 0.40870 0.41037 0.41880
Eigenvalues --- 0.41959 0.42256 0.42336 0.42351 0.42719
Eigenvalues --- 0.43007 0.43096 0.43402 0.43821 0.43941
Eigenvalues --- 0.44116 0.45370 0.45603 0.46092 0.46243
Eigenvalues --- 0.46426 0.46506 0.46711 0.46901 0.48273
Eigenvalues --- 0.48384 0.49543 0.49680 0.49914 0.50287
Eigenvalues --- 0.51285 0.51960 0.52463 0.52654
RFO step: Lambda=-2.54307149D-04 EMin= 5.69333669D-03
Linear search not attempted -- first point.
Iteration 1 RMS(Cart)= 0.01179840 RMS(Int)= 0.00003244
Iteration 2 RMS(Cart)= 0.00006559 RMS(Int)= 0.00000462
Iteration 3 RMS(Cart)= 0.00000000 RMS(Int)= 0.00000462
ITry= 1 IFail=0 DXMaxC= 7.08D-02 DCOld= 1.00D+10 DXMaxT= 3.00D-01 DXLimC= 3.00D+00 Rises=F
Variable Old X -DE/DX Delta X Delta X Delta X New X
(Linear) (Quad) (Total)
R1 2.62884 -0.00085 0.00000 -0.00176 -0.00176 2.62708
R2 2.68134 -0.00051 0.00000 -0.00121 -0.00121 2.68013
R3 2.55832 0.00382 0.00000 0.00704 0.00704 2.56536
R4 2.80490 0.00015 0.00000 0.00045 0.00045 2.80535
R5 2.71675 0.00052 0.00000 0.00131 0.00131 2.71806
R6 2.61730 -0.00049 0.00000 -0.00079 -0.00079 2.61651
R7 2.71328 0.00030 0.00000 0.00071 0.00071 2.71399
R8 2.56967 0.00289 0.00000 0.00565 0.00566 2.57532
R9 2.67233 -0.00022 0.00000 -0.00049 -0.00050 2.67183
R10 2.58248 0.00056 0.00000 0.00108 0.00108 2.58356
R11 2.04720 0.00019 0.00000 0.00052 0.00052 2.04772
R12 2.68089 -0.00017 0.00000 -0.00036 -0.00036 2.68052
R13 2.04893 -0.00004 0.00000 -0.00012 -0.00012 2.04881
R14 2.70318 -0.00018 0.00000 -0.00038 -0.00038 2.70280
R15 2.67913 0.00006 0.00000 0.00016 0.00016 2.67929
R16 2.68535 -0.00029 0.00000 -0.00066 -0.00066 2.68469
R17 2.70707 0.00003 0.00000 0.00008 0.00008 2.70715
R18 2.68607 -0.00015 0.00000 -0.00036 -0.00036 2.68571
R19 2.68107 -0.00021 0.00000 -0.00048 -0.00048 2.68059
R20 2.68127 0.00013 0.00000 0.00034 0.00034 2.68161
R21 2.58663 0.00061 0.00000 0.00123 0.00123 2.58787
R22 2.04885 0.00010 0.00000 0.00027 0.00027 2.04912
R23 2.59457 -0.00032 0.00000 -0.00064 -0.00065 2.59393
R24 2.04964 0.00000 0.00000 0.00001 0.00001 2.04965
R25 2.59639 -0.00043 0.00000 -0.00088 -0.00088 2.59551
R26 2.04980 -0.00015 0.00000 -0.00042 -0.00042 2.04939
R27 2.66922 -0.00017 0.00000 -0.00042 -0.00042 2.66880
R28 2.04766 -0.00028 0.00000 -0.00080 -0.00080 2.04686
R29 2.76520 -0.00278 0.00000 -0.00800 -0.00799 2.75721
R30 2.76623 -0.00226 0.00000 -0.00649 -0.00648 2.75975
R31 2.96085 0.00067 0.00000 0.00299 0.00300 2.96384
R32 2.95004 0.00095 0.00000 0.00401 0.00401 2.95405
R33 2.04675 0.00026 0.00000 0.00073 0.00073 2.04747
R34 2.59741 -0.00026 0.00000 -0.00054 -0.00054 2.59687
R35 2.04196 -0.00009 0.00000 -0.00024 -0.00024 2.04172
R36 2.67019 -0.00001 0.00000 -0.00006 -0.00006 2.67014
R37 2.04833 -0.00027 0.00000 -0.00075 -0.00075 2.04758
R38 2.04764 -0.00020 0.00000 -0.00057 -0.00057 2.04706
R39 2.59852 -0.00006 0.00000 -0.00013 -0.00013 2.59839
R40 2.04841 -0.00022 0.00000 -0.00062 -0.00062 2.04780
R41 2.04354 0.00000 0.00000 0.00000 0.00000 2.04354
R42 2.63118 0.00013 0.00000 0.00028 0.00028 2.63146
R43 2.63716 -0.00004 0.00000 -0.00011 -0.00011 2.63705
R44 2.04763 -0.00007 0.00000 -0.00019 -0.00019 2.04745
R45 2.63399 0.00016 0.00000 0.00037 0.00037 2.63436
R46 2.04753 0.00024 0.00000 0.00069 0.00069 2.04822
R47 2.81350 0.00016 0.00000 0.00047 0.00047 2.81396
R48 2.63845 0.00060 0.00000 0.00101 0.00100 2.63946
R49 2.63654 -0.00015 0.00000 -0.00061 -0.00061 2.63593
R50 2.66052 -0.00067 0.00000 -0.00153 -0.00152 2.65901
R51 2.56210 -0.00130 0.00000 -0.00241 -0.00241 2.55968
R52 2.82896 0.00039 0.00000 0.00118 0.00118 2.83015
R53 2.06360 0.00025 0.00000 0.00072 0.00072 2.06432
R54 2.06266 0.00020 0.00000 0.00058 0.00058 2.06324
R55 2.06166 0.00007 0.00000 0.00020 0.00020 2.06186
R56 2.65498 -0.00085 0.00000 -0.00201 -0.00201 2.65296
R57 2.55637 -0.00110 0.00000 -0.00207 -0.00207 2.55430
R58 2.81733 -0.00066 0.00000 -0.00197 -0.00197 2.81536
R59 2.06205 0.00000 0.00000 0.00000 0.00000 2.06205
R60 2.06385 0.00004 0.00000 0.00011 0.00011 2.06396
R61 2.05228 -0.00012 0.00000 -0.00035 -0.00035 2.05192
R62 2.82923 0.00049 0.00000 0.00149 0.00149 2.83072
R63 2.06171 0.00014 0.00000 0.00041 0.00041 2.06213
R64 2.06265 0.00020 0.00000 0.00057 0.00057 2.06323
R65 2.06376 0.00028 0.00000 0.00081 0.00081 2.06457
R66 2.63405 0.00010 0.00000 0.00025 0.00025 2.63430
R67 2.04753 0.00033 0.00000 0.00093 0.00093 2.04846
R68 2.63140 0.00008 0.00000 0.00017 0.00017 2.63157
R69 2.04758 0.00015 0.00000 0.00042 0.00042 2.04800
R70 2.63776 -0.00002 0.00000 -0.00008 -0.00008 2.63768
R71 2.04750 -0.00012 0.00000 -0.00033 -0.00033 2.04718
R72 2.81221 -0.00040 0.00000 -0.00119 -0.00119 2.81101
R73 2.06354 -0.00005 0.00000 -0.00013 -0.00013 2.06340
R74 2.06035 -0.00013 0.00000 -0.00038 -0.00038 2.05997
R75 2.06002 -0.00000 0.00000 -0.00001 -0.00001 2.06000
R76 2.70041 0.00051 0.00000 0.00124 0.00124 2.70164
R77 2.70147 0.00100 0.00000 0.00241 0.00241 2.70388
R78 2.62087 -0.00113 0.00000 -0.00236 -0.00236 2.61851
R79 2.66267 0.00159 0.00000 0.00362 0.00362 2.66629
R80 2.04040 -0.00001 0.00000 -0.00004 -0.00004 2.04036
R81 2.65899 0.00121 0.00000 0.00278 0.00277 2.66176
R82 2.62538 -0.00066 0.00000 -0.00130 -0.00131 2.62407
R83 2.04027 0.00002 0.00000 0.00007 0.00007 2.04033
A1 2.10417 0.00021 0.00000 0.00107 0.00107 2.10524
A2 2.16084 -0.00052 0.00000 -0.00241 -0.00241 2.15843
A3 2.01734 0.00031 0.00000 0.00138 0.00138 2.01872
A4 2.11055 -0.00017 0.00000 -0.00088 -0.00089 2.10966
A5 2.06213 0.00023 0.00000 0.00104 0.00103 2.06317
A6 2.11048 -0.00006 0.00000 -0.00021 -0.00022 2.11027
A7 2.09163 0.00026 0.00000 0.00108 0.00107 2.09270
A8 2.12369 -0.00028 0.00000 -0.00102 -0.00102 2.12266
A9 2.06562 0.00003 0.00000 0.00011 0.00011 2.06573
A10 2.10265 -0.00015 0.00000 -0.00030 -0.00030 2.10235
A11 2.12455 0.00010 0.00000 0.00024 0.00024 2.12479
A12 2.05595 0.00004 0.00000 0.00003 0.00002 2.05598
A13 2.11390 -0.00024 0.00000 -0.00094 -0.00095 2.11295
A14 2.04868 0.00024 0.00000 0.00123 0.00122 2.04990
A15 2.12052 0.00001 0.00000 -0.00021 -0.00021 2.12031
A16 2.10039 0.00011 0.00000 0.00081 0.00080 2.10119
A17 2.10257 0.00008 0.00000 0.00057 0.00056 2.10313
A18 2.07957 -0.00019 0.00000 -0.00115 -0.00115 2.07841
A19 2.07444 -0.00003 0.00000 0.00007 0.00007 2.07450
A20 2.11994 -0.00006 0.00000 -0.00042 -0.00043 2.11951
A21 2.08872 0.00010 0.00000 0.00040 0.00040 2.08912
A22 2.09507 -0.00027 0.00000 -0.00091 -0.00092 2.09415
A23 2.13400 0.00018 0.00000 0.00064 0.00063 2.13463
A24 2.05360 0.00009 0.00000 0.00045 0.00045 2.05405
A25 2.08507 0.00005 0.00000 0.00022 0.00022 2.08529
A26 2.14349 -0.00016 0.00000 -0.00054 -0.00055 2.14294
A27 2.05320 0.00012 0.00000 0.00062 0.00062 2.05382
A28 2.08270 -0.00012 0.00000 -0.00044 -0.00044 2.08226
A29 2.08716 -0.00002 0.00000 0.00001 0.00001 2.08717
A30 2.11293 0.00014 0.00000 0.00054 0.00053 2.11346
A31 2.10163 0.00001 0.00000 0.00028 0.00027 2.10191
A32 2.07681 -0.00017 0.00000 -0.00110 -0.00110 2.07571
A33 2.10417 0.00016 0.00000 0.00099 0.00099 2.10515
A34 2.11252 -0.00020 0.00000 -0.00086 -0.00086 2.11166
A35 2.06634 0.00023 0.00000 0.00128 0.00127 2.06762
A36 2.10420 -0.00003 0.00000 -0.00033 -0.00034 2.10386
A37 2.11213 -0.00021 0.00000 -0.00090 -0.00090 2.11122
A38 2.06705 0.00027 0.00000 0.00150 0.00150 2.06854
A39 2.10392 -0.00006 0.00000 -0.00053 -0.00054 2.10339
A40 2.08694 0.00011 0.00000 0.00043 0.00043 2.08736
A41 2.10205 -0.00001 0.00000 0.00010 0.00010 2.10215
A42 2.09409 -0.00010 0.00000 -0.00045 -0.00046 2.09363
A43 1.98595 0.00120 0.00000 0.00894 0.00895 1.99490
A44 1.85238 -0.00032 0.00000 -0.00169 -0.00169 1.85070
A45 1.97522 -0.00017 0.00000 -0.00085 -0.00087 1.97435
A46 1.96778 -0.00036 0.00000 -0.00346 -0.00346 1.96432
A47 1.81431 -0.00038 0.00000 -0.00183 -0.00184 1.81248
A48 1.86748 -0.00004 0.00000 -0.00176 -0.00176 1.86572
A49 2.18230 -0.00046 0.00000 -0.00378 -0.00377 2.17853
A50 2.04231 -0.00098 0.00000 -0.00543 -0.00543 2.03688
A51 2.10027 -0.00007 0.00000 -0.00017 -0.00017 2.10010
A52 2.05883 0.00007 0.00000 0.00028 0.00028 2.05910
A53 2.12408 0.00000 0.00000 -0.00010 -0.00010 2.12398
A54 2.11732 -0.00015 0.00000 -0.00076 -0.00076 2.11656
A55 2.07975 0.00025 0.00000 0.00147 0.00146 2.08121
A56 2.08606 -0.00009 0.00000 -0.00064 -0.00065 2.08540
A57 2.10711 0.00008 0.00000 0.00027 0.00027 2.10738
A58 2.08805 0.00001 0.00000 0.00022 0.00021 2.08826
A59 2.08801 -0.00010 0.00000 -0.00045 -0.00046 2.08755
A60 2.08732 0.00017 0.00000 0.00071 0.00071 2.08803
A61 2.10203 0.00005 0.00000 0.00050 0.00050 2.10252
A62 2.09366 -0.00021 0.00000 -0.00111 -0.00112 2.09254
A63 2.10664 0.00015 0.00000 0.00061 0.00061 2.10725
A64 2.08834 -0.00021 0.00000 -0.00111 -0.00112 2.08721
A65 2.08820 0.00006 0.00000 0.00054 0.00053 2.08872
A66 2.11737 -0.00023 0.00000 -0.00100 -0.00100 2.11637
A67 2.07853 0.00033 0.00000 0.00183 0.00182 2.08035
A68 2.08722 -0.00009 0.00000 -0.00077 -0.00078 2.08644
A69 2.09630 0.00025 0.00000 0.00106 0.00106 2.09737
A70 2.10053 0.00010 0.00000 0.00089 0.00089 2.10142
A71 2.08635 -0.00035 0.00000 -0.00195 -0.00195 2.08440
A72 2.09618 -0.00004 0.00000 -0.00012 -0.00012 2.09606
A73 2.09011 -0.00008 0.00000 -0.00054 -0.00054 2.08957
A74 2.09690 0.00012 0.00000 0.00066 0.00066 2.09756
A75 2.08184 -0.00046 0.00000 -0.00159 -0.00159 2.08025
A76 2.08152 -0.00032 0.00000 -0.00104 -0.00104 2.08048
A77 2.11979 0.00078 0.00000 0.00266 0.00266 2.12245
A78 2.14435 0.00014 0.00000 0.00140 0.00139 2.14574
A79 2.24889 -0.00086 0.00000 -0.00443 -0.00445 2.24443
A80 1.88377 0.00071 0.00000 0.00208 0.00207 1.88584
A81 1.95134 0.00015 0.00000 0.00136 0.00136 1.95270
A82 1.95164 0.00010 0.00000 0.00078 0.00078 1.95242
A83 1.91279 -0.00018 0.00000 -0.00171 -0.00171 1.91108
A84 1.86199 0.00005 0.00000 0.00137 0.00137 1.86335
A85 1.89081 -0.00003 0.00000 -0.00054 -0.00054 1.89027
A86 1.89305 -0.00008 0.00000 -0.00129 -0.00129 1.89176
A87 2.15843 -0.00002 0.00000 0.00119 0.00120 2.15962
A88 2.21690 -0.00081 0.00000 -0.00396 -0.00396 2.21293
A89 1.88601 0.00083 0.00000 0.00269 0.00269 1.88870
A90 1.89873 0.00018 0.00000 0.00180 0.00180 1.90053
A91 1.93749 -0.00024 0.00000 -0.00211 -0.00211 1.93538
A92 1.95394 -0.00013 0.00000 -0.00091 -0.00092 1.95302
A93 1.87597 0.00006 0.00000 0.00057 0.00057 1.87655
A94 1.91253 0.00016 0.00000 0.00216 0.00216 1.91469
A95 1.88354 -0.00002 0.00000 -0.00142 -0.00143 1.88211
A96 1.91292 -0.00019 0.00000 -0.00177 -0.00177 1.91115
A97 1.95393 0.00014 0.00000 0.00107 0.00107 1.95500
A98 1.94940 0.00018 0.00000 0.00149 0.00149 1.95089
A99 1.89351 -0.00009 0.00000 -0.00124 -0.00124 1.89227
A100 1.88945 -0.00004 0.00000 -0.00061 -0.00061 1.88884
A101 1.86237 -0.00000 0.00000 0.00101 0.00101 1.86338
A102 2.09213 -0.00013 0.00000 -0.00049 -0.00049 2.09164
A103 2.09551 0.00010 0.00000 0.00048 0.00047 2.09599
A104 2.09554 0.00003 0.00000 0.00001 0.00001 2.09555
A105 2.09582 -0.00004 0.00000 -0.00015 -0.00015 2.09567
A106 2.09705 0.00015 0.00000 0.00092 0.00092 2.09797
A107 2.09031 -0.00012 0.00000 -0.00077 -0.00077 2.08954
A108 2.09642 0.00028 0.00000 0.00116 0.00116 2.09758
A109 2.10103 0.00004 0.00000 0.00052 0.00052 2.10155
A110 2.08573 -0.00032 0.00000 -0.00168 -0.00168 2.08405
A111 2.10124 0.00023 0.00000 0.00100 0.00100 2.10223
A112 2.08952 -0.00033 0.00000 -0.00146 -0.00146 2.08805
A113 2.09243 0.00010 0.00000 0.00047 0.00047 2.09290
A114 1.94744 -0.00003 0.00000 -0.00060 -0.00060 1.94684
A115 1.94162 -0.00010 0.00000 -0.00109 -0.00109 1.94053
A116 1.90948 0.00016 0.00000 0.00185 0.00185 1.91133
A117 1.87341 -0.00020 0.00000 -0.00278 -0.00279 1.87062
A118 1.88513 0.00008 0.00000 0.00136 0.00136 1.88649
A119 1.90534 0.00009 0.00000 0.00129 0.00129 1.90664
A120 2.10887 -0.00041 0.00000 -0.00161 -0.00161 2.10725
A121 2.28512 0.00071 0.00000 0.00283 0.00283 2.28795
A122 1.88807 -0.00030 0.00000 -0.00129 -0.00129 1.88678
A123 2.10984 -0.00041 0.00000 -0.00147 -0.00147 2.10838
A124 2.27728 0.00074 0.00000 0.00298 0.00297 2.28025
A125 1.88963 -0.00031 0.00000 -0.00104 -0.00104 1.88859
A126 2.25801 0.00026 0.00000 0.00100 0.00099 2.25900
A127 2.17655 -0.00028 0.00000 -0.00117 -0.00117 2.17538
A128 1.84835 0.00002 0.00000 0.00028 0.00028 1.84863
A129 1.90043 -0.00008 0.00000 -0.00007 -0.00007 1.90036
A130 2.20649 0.00023 0.00000 0.00128 0.00128 2.20777
A131 2.17614 -0.00016 0.00000 -0.00114 -0.00114 2.17499
A132 2.21204 -0.00010 0.00000 -0.00050 -0.00050 2.21153
A133 1.90231 -0.00034 0.00000 -0.00115 -0.00114 1.90117
A134 2.16882 0.00044 0.00000 0.00166 0.00166 2.17048
A135 2.18149 -0.00007 0.00000 -0.00035 -0.00036 2.18114
A136 1.90465 -0.00047 0.00000 -0.00176 -0.00175 1.90290
A137 2.19661 0.00054 0.00000 0.00207 0.00207 2.19869
A138 1.89640 -0.00010 0.00000 -0.00004 -0.00004 1.89635
A139 2.17982 -0.00015 0.00000 -0.00124 -0.00124 2.17857
A140 2.20690 0.00025 0.00000 0.00126 0.00126 2.20816
A141 2.25769 0.00023 0.00000 0.00080 0.00080 2.25849
A142 2.17656 -0.00026 0.00000 -0.00119 -0.00119 2.17537
A143 1.84893 0.00003 0.00000 0.00039 0.00039 1.84932
D1 2.93952 -0.00011 0.00000 -0.00032 -0.00032 2.93920
D2 -0.19591 0.00007 0.00000 0.00746 0.00746 -0.18846
D3 -0.15607 -0.00010 0.00000 -0.00147 -0.00147 -0.15755
D4 2.99168 0.00007 0.00000 0.00631 0.00631 2.99798
D5 0.09881 -0.00008 0.00000 -0.00633 -0.00633 0.09247
D6 -3.05690 0.00004 0.00000 -0.00025 -0.00025 -3.05715
D7 -3.08516 -0.00010 0.00000 -0.00537 -0.00537 -3.09052
D8 0.04232 0.00001 0.00000 0.00071 0.00072 0.04303
D9 -0.81724 -0.00041 0.00000 -0.00040 -0.00039 -0.81763
D10 2.36827 -0.00041 0.00000 -0.00149 -0.00149 2.36677
D11 0.87319 0.00007 0.00000 0.00485 0.00484 0.87802
D12 -2.19519 0.00001 0.00000 0.00226 0.00225 -2.19294
D13 -2.27474 -0.00011 0.00000 -0.00314 -0.00315 -2.27788
D14 0.94007 -0.00017 0.00000 -0.00573 -0.00573 0.93434
D15 0.16046 -0.00004 0.00000 -0.00352 -0.00352 0.15694
D16 -2.94584 -0.00015 0.00000 -0.00955 -0.00955 -2.95539
D17 -2.97498 0.00014 0.00000 0.00426 0.00426 -2.97071
D18 0.20191 0.00002 0.00000 -0.00177 -0.00177 0.20014
D19 -0.05291 -0.00008 0.00000 -0.00312 -0.00313 -0.05604
D20 3.09776 -0.00002 0.00000 0.00111 0.00111 3.09887
D21 3.01789 -0.00004 0.00000 -0.00067 -0.00067 3.01721
D22 -0.11463 0.00003 0.00000 0.00356 0.00356 -0.11107
D23 -3.10036 0.00008 0.00000 0.00168 0.00168 -3.09867
D24 0.09991 -0.00005 0.00000 -0.00461 -0.00461 0.09530
D25 0.11340 0.00001 0.00000 -0.00091 -0.00090 0.11250
D26 -2.96952 -0.00012 0.00000 -0.00720 -0.00720 -2.97672
D27 -1.20391 -0.00013 0.00000 0.00488 0.00487 -1.19903
D28 1.92895 -0.00019 0.00000 0.00081 0.00080 1.92976
D29 0.03668 -0.00004 0.00000 -0.00363 -0.00363 0.03305
D30 -3.10895 0.00005 0.00000 0.00147 0.00147 -3.10748
D31 -3.09607 0.00003 0.00000 0.00050 0.00050 -3.09557
D32 0.04149 0.00012 0.00000 0.00560 0.00560 0.04709
D33 0.04069 0.00001 0.00000 0.00076 0.00076 0.04144
D34 -3.14030 0.00016 0.00000 0.00746 0.00746 -3.13284
D35 -3.08620 -0.00011 0.00000 -0.00559 -0.00559 -3.09179
D36 0.01599 0.00004 0.00000 0.00112 0.00112 0.01712
D37 -0.07381 0.00007 0.00000 0.00330 0.00329 -0.07051
D38 3.05371 0.00015 0.00000 0.00728 0.00728 3.06099
D39 3.10667 -0.00008 0.00000 -0.00336 -0.00336 3.10330
D40 -0.04900 0.00001 0.00000 0.00062 0.00062 -0.04838
D41 -0.02742 -0.00002 0.00000 -0.00183 -0.00183 -0.02925
D42 3.08048 0.00009 0.00000 0.00393 0.00394 3.08441
D43 3.12799 -0.00011 0.00000 -0.00574 -0.00574 3.12225
D44 -0.04730 0.00001 0.00000 0.00003 0.00003 -0.04727
D45 -3.09913 -0.00011 0.00000 -0.00453 -0.00453 -3.10367
D46 0.02822 0.00002 0.00000 0.00125 0.00125 0.02947
D47 0.02827 -0.00002 0.00000 -0.00052 -0.00052 0.02776
D48 -3.12756 0.00011 0.00000 0.00526 0.00527 -3.12229
D49 3.13851 0.00011 0.00000 0.00617 0.00618 -3.13850
D50 0.00987 -0.00001 0.00000 0.00023 0.00023 0.01010
D51 0.03141 0.00000 0.00000 0.00030 0.00030 0.03171
D52 -3.09723 -0.00012 0.00000 -0.00564 -0.00565 -3.10287
D53 -0.03711 -0.00003 0.00000 -0.00163 -0.00163 -0.03875
D54 3.13435 -0.00011 0.00000 -0.00577 -0.00578 3.12857
D55 3.04882 0.00009 0.00000 0.00430 0.00431 3.05312
D56 -0.06291 0.00000 0.00000 0.00016 0.00016 -0.06275
D57 3.12984 0.00013 0.00000 0.00637 0.00637 3.13621
D58 0.00019 -0.00002 0.00000 -0.00054 -0.00054 -0.00035
D59 0.04591 0.00001 0.00000 0.00020 0.00019 0.04610
D60 -3.08374 -0.00014 0.00000 -0.00671 -0.00671 -3.09045
D61 -0.04219 0.00002 0.00000 0.00164 0.00164 -0.04055
D62 3.13579 -0.00009 0.00000 -0.00378 -0.00377 3.13202
D63 3.06908 0.00011 0.00000 0.00584 0.00584 3.07492
D64 -0.03612 -0.00000 0.00000 0.00042 0.00042 -0.03569
D65 0.03459 -0.00002 0.00000 -0.00062 -0.00062 0.03397
D66 -3.12368 0.00011 0.00000 0.00543 0.00543 -3.11825
D67 -3.07661 -0.00010 0.00000 -0.00482 -0.00482 -3.08142
D68 0.04831 0.00003 0.00000 0.00123 0.00123 0.04954
D69 0.04407 0.00002 0.00000 0.00094 0.00094 0.04501
D70 -3.09333 -0.00008 0.00000 -0.00435 -0.00435 -3.09768
D71 -3.13449 0.00013 0.00000 0.00640 0.00641 -3.12809
D72 0.01129 0.00003 0.00000 0.00111 0.00111 0.01240
D73 0.01311 0.00002 0.00000 0.00064 0.00064 0.01376
D74 3.13461 0.00015 0.00000 0.00665 0.00665 3.14126
D75 -3.11144 -0.00012 0.00000 -0.00555 -0.00555 -3.11699
D76 0.01005 0.00001 0.00000 0.00046 0.00046 0.01052
D77 0.00838 0.00002 0.00000 0.00062 0.00062 0.00900
D78 3.13457 0.00014 0.00000 0.00636 0.00636 3.14092
D79 -3.11867 -0.00012 0.00000 -0.00530 -0.00529 -3.12397
D80 0.00751 0.00001 0.00000 0.00044 0.00044 0.00795
D81 -0.02517 -0.00000 0.00000 -0.00027 -0.00027 -0.02544
D82 3.11039 0.00013 0.00000 0.00578 0.00578 3.11616
D83 3.13176 -0.00013 0.00000 -0.00599 -0.00598 3.12578
D84 -0.01587 -0.00000 0.00000 0.00007 0.00007 -0.01580
D85 0.35106 -0.00015 0.00000 0.00020 0.00021 0.35128
D86 2.52516 -0.00005 0.00000 0.00042 0.00043 2.52558
D87 -1.71502 -0.00040 0.00000 -0.00325 -0.00325 -1.71826
D88 0.99619 -0.00012 0.00000 -0.00232 -0.00232 0.99387
D89 -1.11454 -0.00033 0.00000 -0.00417 -0.00416 -1.11870
D90 -3.13072 0.00011 0.00000 0.00062 0.00062 -3.13009
D91 2.47607 -0.00046 0.00000 -0.00400 -0.00400 2.47207
D92 -0.79969 -0.00054 0.00000 -0.01409 -0.01409 -0.81378
D93 -1.62181 0.00059 0.00000 0.00385 0.00385 -1.61796
D94 1.38561 0.00052 0.00000 -0.00625 -0.00624 1.37937
D95 0.36220 -0.00007 0.00000 -0.00118 -0.00117 0.36103
D96 -2.91356 -0.00015 0.00000 -0.01128 -0.01126 -2.92482
D97 -2.34261 0.00058 0.00000 0.00505 0.00505 -2.33757
D98 1.04921 0.00049 0.00000 0.00509 0.00509 1.05430
D99 1.77731 -0.00055 0.00000 -0.00425 -0.00425 1.77306
D100 -1.11404 -0.00064 0.00000 -0.00421 -0.00422 -1.11826
D101 -0.30850 0.00007 0.00000 0.00140 0.00140 -0.30710
D102 3.08333 -0.00002 0.00000 0.00144 0.00143 3.08477
D103 0.00082 -0.00001 0.00000 -0.00016 -0.00016 0.00066
D104 -3.13357 -0.00015 0.00000 -0.00672 -0.00671 -3.14028
D105 3.13042 0.00014 0.00000 0.00679 0.00678 3.13720
D106 -0.00397 0.00000 0.00000 0.00023 0.00023 -0.00374
D107 -0.03134 -0.00001 0.00000 -0.00027 -0.00027 -0.03162
D108 3.13025 -0.00014 0.00000 -0.00627 -0.00626 3.12398
D109 3.10304 0.00014 0.00000 0.00629 0.00628 3.10933
D110 -0.01855 0.00000 0.00000 0.00029 0.00029 -0.01826
D111 0.00458 -0.00001 0.00000 -0.00020 -0.00020 0.00438
D112 3.13315 0.00012 0.00000 0.00579 0.00579 3.13894
D113 -3.13097 -0.00014 0.00000 -0.00625 -0.00625 -3.13722
D114 -0.00240 -0.00001 0.00000 -0.00026 -0.00026 -0.00266
D115 -0.00306 0.00001 0.00000 0.00032 0.00032 -0.00273
D116 3.13925 -0.00001 0.00000 -0.00063 -0.00063 3.13862
D117 3.14121 0.00002 0.00000 0.00079 0.00079 -3.14118
D118 0.00034 -0.00000 0.00000 -0.00017 -0.00017 0.00017
D119 -3.13895 -0.00001 0.00000 -0.00033 -0.00033 -3.13928
D120 0.00127 -0.00000 0.00000 -0.00004 -0.00004 0.00123
D121 -0.00001 -0.00002 0.00000 -0.00079 -0.00079 -0.00080
D122 3.14020 -0.00001 0.00000 -0.00049 -0.00049 3.13971
D123 0.00162 -0.00000 0.00000 -0.00019 -0.00019 0.00143
D124 -3.13976 -0.00002 0.00000 -0.00098 -0.00098 -3.14074
D125 -3.14069 0.00002 0.00000 0.00077 0.00077 -3.13992
D126 0.00111 -0.00000 0.00000 -0.00002 -0.00002 0.00109
D127 -1.49806 -0.00008 0.00000 -0.00435 -0.00435 -1.50241
D128 1.64491 -0.00008 0.00000 -0.00464 -0.00464 1.64026
D129 1.63495 0.00005 0.00000 0.00092 0.00092 1.63587
D130 -1.50527 0.00004 0.00000 0.00062 0.00062 -1.50464
D131 -3.10148 0.00005 0.00000 0.00433 0.00434 -3.09714
D132 -0.01735 -0.00000 0.00000 0.00252 0.00252 -0.01483
D133 0.04889 -0.00007 0.00000 -0.00104 -0.00104 0.04784
D134 3.13301 -0.00013 0.00000 -0.00285 -0.00285 3.13016
D135 -3.12545 -0.00010 0.00000 -0.00427 -0.00427 -3.12973
D136 -0.12067 -0.00000 0.00000 0.00056 0.00057 -0.12010
D137 0.00737 0.00002 0.00000 0.00109 0.00111 0.00847
D138 3.01215 0.00012 0.00000 0.00593 0.00595 3.01810
D139 -0.24266 0.00005 0.00000 -0.00017 -0.00018 -0.24284
D140 3.00840 -0.00011 0.00000 -0.00434 -0.00435 3.00404
D141 3.00865 0.00022 0.00000 0.00854 0.00855 3.01720
D142 -0.02348 0.00005 0.00000 0.00437 0.00438 -0.01910
D143 0.14440 -0.00002 0.00000 0.00170 0.00168 0.14609
D144 -3.00402 0.00002 0.00000 0.00469 0.00466 -2.99935
D145 -3.11557 -0.00011 0.00000 -0.00717 -0.00717 -3.12274
D146 0.01920 -0.00006 0.00000 -0.00418 -0.00419 0.01501
D147 -1.06528 -0.00014 0.00000 -0.00432 -0.00433 -1.06961
D148 2.04744 -0.00006 0.00000 0.00144 0.00144 2.04889
D149 1.02134 0.00009 0.00000 -0.00110 -0.00111 1.02024
D150 -2.14912 0.00017 0.00000 0.00466 0.00466 -2.14445
D151 3.12112 -0.00007 0.00000 -0.00337 -0.00338 3.11775
D152 -0.04934 0.00001 0.00000 0.00239 0.00239 -0.04694
D153 0.13106 0.00005 0.00000 -0.00007 -0.00007 0.13099
D154 -2.96484 0.00006 0.00000 0.00123 0.00123 -2.96361
D155 3.06316 -0.00006 0.00000 -0.00092 -0.00093 3.06224
D156 -0.03274 -0.00005 0.00000 0.00038 0.00038 -0.03237
D157 -0.15199 0.00006 0.00000 0.00148 0.00148 -0.15051
D158 2.95968 0.00007 0.00000 0.00020 0.00021 2.95988
D159 -3.07507 0.00004 0.00000 0.00153 0.00153 -3.07355
D160 0.03659 0.00005 0.00000 0.00025 0.00025 0.03685
D161 2.68232 0.00009 0.00000 0.00186 0.00185 2.68418
D162 -0.45146 0.00004 0.00000 -0.00155 -0.00155 -0.45301
D163 -1.54005 0.00013 0.00000 0.00242 0.00242 -1.53763
D164 1.60935 0.00008 0.00000 -0.00098 -0.00098 1.60837
D165 0.56609 -0.00016 0.00000 -0.00149 -0.00149 0.56460
D166 -2.56769 -0.00021 0.00000 -0.00490 -0.00489 -2.57258
D167 -3.07383 0.00004 0.00000 0.00004 0.00004 -3.07379
D168 0.06578 0.00001 0.00000 -0.00020 -0.00020 0.06558
D169 -0.97191 -0.00011 0.00000 -0.00203 -0.00203 -0.97393
D170 2.16770 -0.00014 0.00000 -0.00226 -0.00226 2.16543
D171 1.11545 0.00011 0.00000 0.00103 0.00103 1.11648
D172 -2.02813 0.00008 0.00000 0.00079 0.00079 -2.02734
D173 0.00161 -0.00001 0.00000 -0.00025 -0.00025 0.00137
D174 -3.14138 -0.00002 0.00000 -0.00082 -0.00082 3.14099
D175 -3.14019 0.00001 0.00000 0.00055 0.00055 -3.13964
D176 -0.00000 -0.00000 0.00000 -0.00002 -0.00002 -0.00003
D177 -0.00341 0.00001 0.00000 0.00053 0.00053 -0.00287
D178 3.13882 -0.00001 0.00000 -0.00039 -0.00039 3.13844
D179 3.13959 0.00002 0.00000 0.00110 0.00110 3.14069
D180 -0.00137 0.00000 0.00000 0.00018 0.00018 -0.00119
D181 0.00196 -0.00001 0.00000 -0.00039 -0.00039 0.00157
[truncated: 25,506 more rows]

## Sheet: bodipy-ey-vertical-negative
Entering Gaussian System, Link 0=g09
Input=bodipy-ey-vertical-negative.gjf
Output=bodipy-ey-vertical-negative.log
Initial command:
/public/apps/gs/g09/l1.exe "/tmp/jianghao/scratch/14024.master/Gau-370591.inp" -scrdir="/tmp/jianghao/scratch/14024.master/"
Entering Link 1 = /public/apps/gs/g09/l1.exe PID= 370592.
Copyright (c) 1988,1990,1992,1993,1995,1998,2003,2009,2015,
Gaussian, Inc. All Rights Reserved.
This is part of the Gaussian(R) 09 program. It is based on
the Gaussian(R) 03 system (copyright 2003, Gaussian, Inc.),
the Gaussian(R) 98 system (copyright 1998, Gaussian, Inc.),
the Gaussian(R) 94 system (copyright 1995, Gaussian, Inc.),
the Gaussian 92(TM) system (copyright 1992, Gaussian, Inc.),
the Gaussian 90(TM) system (copyright 1990, Gaussian, Inc.),
the Gaussian 88(TM) system (copyright 1988, Gaussian, Inc.),
the Gaussian 86(TM) system (copyright 1986, Carnegie Mellon
University), and the Gaussian 82(TM) system (copyright 1983,
Carnegie Mellon University). Gaussian is a federally registered
trademark of Gaussian, Inc.
This software contains proprietary and confidential information,
including trade secrets, belonging to Gaussian, Inc.
This software is provided under written license and may be
used, copied, transmitted, or stored only in accord with that
written license.
The following legend is applicable only to US Government
contracts under FAR:
RESTRICTED RIGHTS LEGEND
Use, reproduction and disclosure by the US Government is
subject to restrictions as set forth in subparagraphs (a)
and (c) of the Commercial Computer Software - Restricted
Rights clause in FAR 52.227-19.
Gaussian, Inc.
340 Quinnipiac St., Bldg. 40, Wallingford CT 06492
---------------------------------------------------------------
Warning -- This program may not be used in any manner that
competes with the business of Gaussian, Inc. or will provide
assistance to any competitor of Gaussian, Inc. The licensee
of this program is prohibited from giving any competitor of
Gaussian, Inc. access to this program. By using this program,
the user acknowledges that Gaussian, Inc. is engaged in the
business of creating and licensing software in the field of
computational chemistry and represents and warrants to the
licensee that it is not a competitor of Gaussian, Inc. and that
it will not use this program in any manner prohibited above.
---------------------------------------------------------------
Cite this work as:
Gaussian 09, Revision E.01,
M. J. Frisch, G. W. Trucks, H. B. Schlegel, G. E. Scuseria,
M. A. Robb, J. R. Cheeseman, G. Scalmani, V. Barone, B. Mennucci,
G. A. Petersson, H. Nakatsuji, M. Caricato, X. Li, H. P. Hratchian,
A. F. Izmaylov, J. Bloino, G. Zheng, J. L. Sonnenberg, M. Hada,
M. Ehara, K. Toyota, R. Fukuda, J. Hasegawa, M. Ishida, T. Nakajima,
Y. Honda, O. Kitao, H. Nakai, T. Vreven, J. A. Montgomery, Jr.,
J. E. Peralta, F. Ogliaro, M. Bearpark, J. J. Heyd, E. Brothers,
K. N. Kudin, V. N. Staroverov, T. Keith, R. Kobayashi, J. Normand,
K. Raghavachari, A. Rendell, J. C. Burant, S. S. Iyengar, J. Tomasi,
M. Cossi, N. Rega, J. M. Millam, M. Klene, J. E. Knox, J. B. Cross,
V. Bakken, C. Adamo, J. Jaramillo, R. Gomperts, R. E. Stratmann,
O. Yazyev, A. J. Austin, R. Cammi, C. Pomelli, J. W. Ochterski,
R. L. Martin, K. Morokuma, V. G. Zakrzewski, G. A. Voth,
P. Salvador, J. J. Dannenberg, S. Dapprich, A. D. Daniels,
O. Farkas, J. B. Foresman, J. V. Ortiz, J. Cioslowski,
and D. J. Fox, Gaussian, Inc., Wallingford CT, 2013.
******************************************
Gaussian 09: ES64L-G09RevE.01 30-Nov-2015
28-May-2023
******************************************
%nprocshared=32
Will use up to 32 processors via shared memory.
%chk=bodipy-ey-vertical-negative.chk
%mem=32GB
----------------------------------------------------------------------
#p opt freq b3lyp/6-311g(d,p) empiricaldispersion=gd3bj scrf=(solvent=
water,pcm) nosymm field=y-20
----------------------------------------------------------------------
1/14=-1,18=20,19=15,26=3,38=1/1,3;
2/9=110,12=2,15=1,17=6,18=5,40=1/2;
3/5=4,6=6,7=101,11=2,14=2,15=-20,16=1,25=1,30=1,70=2201,71=1,72=1,74=-5,124=41/1,2,3;
4//1;
5/5=2,38=5,53=1/2;
6/7=2,8=2,9=2,10=2,28=1/1;
7/30=1/1,2,3,16;
1/14=-1,18=20,19=15,26=3/3(2);
2/9=110,15=1/2;
99//99;
2/9=110,15=1/2;
3/5=4,6=6,7=101,11=2,14=2,15=-20,16=1,25=1,30=1,70=2205,71=1,72=1,74=-5,124=41/1,2,3;
4/5=5,16=3,69=1/1;
5/5=2,38=5,53=1/2;
7/30=1/1,2,3,16;
1/14=-1,18=20,19=15,26=3/3(-5);
2/9=110,15=1/2;
6/7=2,8=2,9=2,10=2,19=2,28=1/1;
99/9=1/99;
Leave Link 1 at Sun May 28 01:46:52 2023, MaxMem= 4294967296 cpu: 3.5
(Enter /public/apps/gs/g09/l101.exe)
-
T
-
Symbolic Z-matrix:
Charge = 0 Multiplicity = 1
C -1.79458 1.23166 -1.1179
C -2.68356 0.65063 -0.21938
C -2.36693 -0.64112 0.43959
C -1.14209 -0.81514 1.06229
C -2.19713 2.3273 -1.92463
C -3.42152 2.91202 -1.7617
C -4.30035 2.46285 -0.74263
C -3.92092 1.33227 0.04733
C -3.2648 -1.75977 0.37654
C -2.93541 -2.96782 1.0724
C -1.70534 -3.0522 1.77432
C -3.8251 -4.07181 1.01908
C -5.53008 3.11912 -0.48371
C -6.35125 2.70678 0.53776
B 0.42074 0.43826 -0.27442
O -0.53468 0.78289 -1.32779
O -0.20234 0.16687 1.02208
C -0.81891 -2.00957 1.74688
C -4.44935 -1.75336 -0.40909
C -5.28034 -2.84713 -0.45752
C -4.97927 -4.01572 0.27756
C -5.96122 1.61885 1.3498
C -4.7836 0.95058 1.11006
H -1.49127 2.68827 -2.66291
H -3.71883 3.74802 -2.38485
H -1.46402 -3.96714 2.30361
H -3.56468 -4.97099 1.56686
H -5.804 3.96611 -1.10352
H -7.2861 3.21928 0.7315
H 0.14447 -2.0685 2.23831
H -4.69297 -0.87356 -0.98721
H -6.17298 -2.81532 -1.07159
H -5.64859 -4.86695 0.23857
H -6.59418 1.31096 2.17416
H -4.4987 0.12509 1.74788
C 5.76486 0.27401 -0.88329
C 7.12889 0.08626 -0.67629
C 3.39187 0.13128 -0.09913
N 1.24623 -0.77822 -0.81631
C 4.37416 -2.86142 -1.04564
N 1.43909 1.5818 0.02937
C -0.58829 -2.17003 -1.90102
C 4.83344 2.88865 0.98672
C 7.58722 -0.4362 0.53192
C 6.67706 -0.77249 1.53263
C 5.3124 -0.5888 1.32536
C 4.85201 -0.0637 0.11677
C -0.21223 3.41628 0.5405
C 2.8211 1.37553 0.17561
C 2.626 -0.93053 -0.58139
C 3.02143 -2.22024 -1.05457
C 1.87682 -2.79871 -1.58253
C 0.80154 -1.90037 -1.43376
C 1.15459 2.83395 0.455
C 2.34833 3.47352 0.83682
C 3.40139 2.58171 0.67601
H 5.40415 0.6802 -1.82084
H 7.83243 0.34841 -1.45751
H 5.09794 -2.28958 -1.63012
H 4.77933 -2.93982 -0.03515
H 4.30647 -3.8644 -1.46953
H -0.54937 -2.8811 -2.72779
H -1.18743 -2.62187 -1.10751
H -1.09107 -1.26328 -2.2242
H 4.90837 3.88811 1.41772
H 5.2599 2.17417 1.69315
H 5.4571 2.85474 0.09085
H 8.64893 -0.58046 0.69299
H 7.02833 -1.17879 2.47368
H 4.60048 -0.85095 2.09893
H -0.59106 3.69805 -0.44414
H -0.91866 2.70494 0.96907
H -0.18598 4.31243 1.16064
H 1.80611 -3.76973 -2.04937
H 2.41615 4.48658 1.20394
NAtoms= 75 NQM= 75 NQMF= 0 NMMI= 0 NMMIF= 0
NMic= 0 NMicF= 0.
Isotopes and Nuclear Properties:
(Nuclear quadrupole moments (NQMom) in fm**2, nuclear magnetic moments (NMagM)
in nuclear magnetons)
Atom 1 2 3 4 5 6 7 8 9 10
IAtWgt= 12 12 12 12 12 12 12 12 12 12
AtmWgt= 12.0000000 12.0000000 12.0000000 12.0000000 12.0000000 12.0000000 12.0000000 12.0000000 12.0000000 12.0000000
NucSpn= 0 0 0 0 0 0 0 0 0 0
AtZEff= 0.0000000 0.0000000 0.0000000 0.0000000 0.0000000 0.0000000 0.0000000 0.0000000 0.0000000 0.0000000
NQMom= 0.0000000 0.0000000 0.0000000 0.0000000 0.0000000 0.0000000 0.0000000 0.0000000 0.0000000 0.0000000
NMagM= 0.0000000 0.0000000 0.0000000 0.0000000 0.0000000 0.0000000 0.0000000 0.0000000 0.0000000 0.0000000
AtZNuc= 6.0000000 6.0000000 6.0000000 6.0000000 6.0000000 6.0000000 6.0000000 6.0000000 6.0000000 6.0000000
Atom 11 12 13 14 15 16 17 18 19 20
IAtWgt= 12 12 12 12 11 16 16 12 12 12
AtmWgt= 12.0000000 12.0000000 12.0000000 12.0000000 11.0093053 15.9949146 15.9949146 12.0000000 12.0000000 12.0000000
NucSpn= 0 0 0 0 3 0 0 0 0 0
AtZEff= 0.0000000 0.0000000 0.0000000 0.0000000 0.0000000 0.0000000 0.0000000 0.0000000 0.0000000 0.0000000
NQMom= 0.0000000 0.0000000 0.0000000 0.0000000 4.0590000 0.0000000 0.0000000 0.0000000 0.0000000 0.0000000
NMagM= 0.0000000 0.0000000 0.0000000 0.0000000 2.6886370 0.0000000 0.0000000 0.0000000 0.0000000 0.0000000
AtZNuc= 6.0000000 6.0000000 6.0000000 6.0000000 5.0000000 8.0000000 8.0000000 6.0000000 6.0000000 6.0000000
Atom 21 22 23 24 25 26 27 28 29 30
IAtWgt= 12 12 12 1 1 1 1 1 1 1
AtmWgt= 12.0000000 12.0000000 12.0000000 1.0078250 1.0078250 1.0078250 1.0078250 1.0078250 1.0078250 1.0078250
NucSpn= 0 0 0 1 1 1 1 1 1 1
AtZEff= 0.0000000 0.0000000 0.0000000 0.0000000 0.0000000 0.0000000 0.0000000 0.0000000 0.0000000 0.0000000
NQMom= 0.0000000 0.0000000 0.0000000 0.0000000 0.0000000 0.0000000 0.0000000 0.0000000 0.0000000 0.0000000
NMagM= 0.0000000 0.0000000 0.0000000 2.7928460 2.7928460 2.7928460 2.7928460 2.7928460 2.7928460 2.7928460
AtZNuc= 6.0000000 6.0000000 6.0000000 1.0000000 1.0000000 1.0000000 1.0000000 1.0000000 1.0000000 1.0000000
Atom 31 32 33 34 35 36 37 38 39 40
IAtWgt= 1 1 1 1 1 12 12 12 14 12
AtmWgt= 1.0078250 1.0078250 1.0078250 1.0078250 1.0078250 12.0000000 12.0000000 12.0000000 14.0030740 12.0000000
NucSpn= 1 1 1 1 1 0 0 0 2 0
AtZEff= 0.0000000 0.0000000 0.0000000 0.0000000 0.0000000 0.0000000 0.0000000 0.0000000 0.0000000 0.0000000
NQMom= 0.0000000 0.0000000 0.0000000 0.0000000 0.0000000 0.0000000 0.0000000 0.0000000 2.0440000 0.0000000
NMagM= 2.7928460 2.7928460 2.7928460 2.7928460 2.7928460 0.0000000 0.0000000 0.0000000 0.4037610 0.0000000
AtZNuc= 1.0000000 1.0000000 1.0000000 1.0000000 1.0000000 6.0000000 6.0000000 6.0000000 7.0000000 6.0000000
Atom 41 42 43 44 45 46 47 48 49 50
IAtWgt= 14 12 12 12 12 12 12 12 12 12
AtmWgt= 14.0030740 12.0000000 12.0000000 12.0000000 12.0000000 12.0000000 12.0000000 12.0000000 12.0000000 12.0000000
NucSpn= 2 0 0 0 0 0 0 0 0 0
AtZEff= 0.0000000 0.0000000 0.0000000 0.0000000 0.0000000 0.0000000 0.0000000 0.0000000 0.0000000 0.0000000
NQMom= 2.0440000 0.0000000 0.0000000 0.0000000 0.0000000 0.0000000 0.0000000 0.0000000 0.0000000 0.0000000
NMagM= 0.4037610 0.0000000 0.0000000 0.0000000 0.0000000 0.0000000 0.0000000 0.0000000 0.0000000 0.0000000
AtZNuc= 7.0000000 6.0000000 6.0000000 6.0000000 6.0000000 6.0000000 6.0000000 6.0000000 6.0000000 6.0000000
Atom 51 52 53 54 55 56 57 58 59 60
IAtWgt= 12 12 12 12 12 12 1 1 1 1
AtmWgt= 12.0000000 12.0000000 12.0000000 12.0000000 12.0000000 12.0000000 1.0078250 1.0078250 1.0078250 1.0078250
NucSpn= 0 0 0 0 0 0 1 1 1 1
AtZEff= 0.0000000 0.0000000 0.0000000 0.0000000 0.0000000 0.0000000 0.0000000 0.0000000 0.0000000 0.0000000
NQMom= 0.0000000 0.0000000 0.0000000 0.0000000 0.0000000 0.0000000 0.0000000 0.0000000 0.0000000 0.0000000
NMagM= 0.0000000 0.0000000 0.0000000 0.0000000 0.0000000 0.0000000 2.7928460 2.7928460 2.7928460 2.7928460
AtZNuc= 6.0000000 6.0000000 6.0000000 6.0000000 6.0000000 6.0000000 1.0000000 1.0000000 1.0000000 1.0000000
Atom 61 62 63 64 65 66 67 68 69 70
IAtWgt= 1 1 1 1 1 1 1 1 1 1
AtmWgt= 1.0078250 1.0078250 1.0078250 1.0078250 1.0078250 1.0078250 1.0078250 1.0078250 1.0078250 1.0078250
NucSpn= 1 1 1 1 1 1 1 1 1 1
AtZEff= 0.0000000 0.0000000 0.0000000 0.0000000 0.0000000 0.0000000 0.0000000 0.0000000 0.0000000 0.0000000
NQMom= 0.0000000 0.0000000 0.0000000 0.0000000 0.0000000 0.0000000 0.0000000 0.0000000 0.0000000 0.0000000
NMagM= 2.7928460 2.7928460 2.7928460 2.7928460 2.7928460 2.7928460 2.7928460 2.7928460 2.7928460 2.7928460
AtZNuc= 1.0000000 1.0000000 1.0000000 1.0000000 1.0000000 1.0000000 1.0000000 1.0000000 1.0000000 1.0000000
Atom 71 72 73 74 75
IAtWgt= 1 1 1 1 1
AtmWgt= 1.0078250 1.0078250 1.0078250 1.0078250 1.0078250
NucSpn= 1 1 1 1 1
AtZEff= 0.0000000 0.0000000 0.0000000 0.0000000 0.0000000
NQMom= 0.0000000 0.0000000 0.0000000 0.0000000 0.0000000
NMagM= 2.7928460 2.7928460 2.7928460 2.7928460 2.7928460
AtZNuc= 1.0000000 1.0000000 1.0000000 1.0000000 1.0000000
Leave Link 101 at Sun May 28 01:46:52 2023, MaxMem= 4294967296 cpu: 16.1
(Enter /public/apps/gs/g09/l103.exe)
GradGradGradGradGradGradGradGradGradGradGradGradGradGradGradGradGradGrad
Berny optimization.
Initialization pass.
----------------------------
! Initial Parameters !
! (Angstroms and Degrees) !
-------------------------- --------------------------
! Name Definition Value Derivative Info. !
--------------------------------------------------------------------------------
! R1 R(1,2) 1.3911 estimate D2E/DX2 !
! R2 R(1,5) 1.4189 estimate D2E/DX2 !
! R3 R(1,16) 1.3538 estimate D2E/DX2 !
! R4 R(2,3) 1.4843 estimate D2E/DX2 !
! R5 R(2,8) 1.4376 estimate D2E/DX2 !
! R6 R(3,4) 1.385 estimate D2E/DX2 !
! R7 R(3,9) 1.4358 estimate D2E/DX2 !
! R8 R(4,17) 1.3598 estimate D2E/DX2 !
! R9 R(4,18) 1.4141 estimate D2E/DX2 !
! R10 R(5,6) 1.3666 estimate D2E/DX2 !
! R11 R(5,24) 1.0833 estimate D2E/DX2 !
! R12 R(6,7) 1.4187 estimate D2E/DX2 !
! R13 R(6,25) 1.0842 estimate D2E/DX2 !
! R14 R(7,8) 1.4305 estimate D2E/DX2 !
! R15 R(7,13) 1.4177 estimate D2E/DX2 !
! R16 R(8,23) 1.421 estimate D2E/DX2 !
! R17 R(9,10) 1.4325 estimate D2E/DX2 !
! R18 R(9,19) 1.4214 estimate D2E/DX2 !
! R19 R(10,11) 1.4188 estimate D2E/DX2 !
! R20 R(10,12) 1.4189 estimate D2E/DX2 !
! R21 R(11,18) 1.3688 estimate D2E/DX2 !
! R22 R(11,26) 1.0842 estimate D2E/DX2 !
! R23 R(12,21) 1.373 estimate D2E/DX2 !
! R24 R(12,27) 1.0846 estimate D2E/DX2 !
! R25 R(13,14) 1.374 estimate D2E/DX2 !
! R26 R(13,28) 1.0847 estimate D2E/DX2 !
! R27 R(14,22) 1.4125 estimate D2E/DX2 !
! R28 R(14,29) 1.0836 estimate D2E/DX2 !
! R29 R(15,16) 1.4633 estimate D2E/DX2 !
! R30 R(15,17) 1.4638 estimate D2E/DX2 !
! R31 R(15,39) 1.5668 estimate D2E/DX2 !
! R32 R(15,41) 1.5611 estimate D2E/DX2 !
! R33 R(18,30) 1.0831 estimate D2E/DX2 !
! R34 R(19,20) 1.3745 estimate D2E/DX2 !
! R35 R(19,31) 1.0806 estimate D2E/DX2 !
! R36 R(20,21) 1.413 estimate D2E/DX2 !
! R37 R(20,32) 1.0839 estimate D2E/DX2 !
! R38 R(21,33) 1.0836 estimate D2E/DX2 !
! R39 R(22,23) 1.3751 estimate D2E/DX2 !
! R40 R(22,34) 1.084 estimate D2E/DX2 !
! R41 R(23,35) 1.0814 estimate D2E/DX2 !
! R42 R(36,37) 1.3924 estimate D2E/DX2 !
! R43 R(36,47) 1.3955 estimate D2E/DX2 !
! R44 R(36,57) 1.0836 estimate D2E/DX2 !
! R45 R(37,44) 1.3938 estimate D2E/DX2 !
! R46 R(37,58) 1.0835 estimate D2E/DX2 !
! R47 R(38,47) 1.4888 estimate D2E/DX2 !
! R48 R(38,49) 1.3962 estimate D2E/DX2 !
! R49 R(38,50) 1.3952 estimate D2E/DX2 !
! R50 R(39,50) 1.4079 estimate D2E/DX2 !
! R51 R(39,53) 1.3558 estimate D2E/DX2 !
! R52 R(40,51) 1.497 estimate D2E/DX2 !
! R53 R(40,59) 1.092 estimate D2E/DX2 !
! R54 R(40,60) 1.0915 estimate D2E/DX2 !
! R55 R(40,61) 1.091 estimate D2E/DX2 !
! R56 R(41,49) 1.405 estimate D2E/DX2 !
! R57 R(41,54) 1.3528 estimate D2E/DX2 !
! R58 R(42,53) 1.4909 estimate D2E/DX2 !
! R59 R(42,62) 1.0912 estimate D2E/DX2 !
! R60 R(42,63) 1.0921 estimate D2E/DX2 !
! R61 R(42,64) 1.086 estimate D2E/DX2 !
! R62 R(43,56) 1.4972 estimate D2E/DX2 !
! R63 R(43,65) 1.091 estimate D2E/DX2 !
! R64 R(43,66) 1.0915 estimate D2E/DX2 !
! R65 R(43,67) 1.0921 estimate D2E/DX2 !
! R66 R(44,45) 1.3939 estimate D2E/DX2 !
! R67 R(44,68) 1.0835 estimate D2E/DX2 !
! R68 R(45,46) 1.3925 estimate D2E/DX2 !
! R69 R(45,69) 1.0835 estimate D2E/DX2 !
! R70 R(46,47) 1.3958 estimate D2E/DX2 !
! R71 R(46,70) 1.0835 estimate D2E/DX2 !
! R72 R(48,54) 1.4882 estimate D2E/DX2 !
! R73 R(48,71) 1.092 estimate D2E/DX2 !
! R74 R(48,72) 1.0903 estimate D2E/DX2 !
! R75 R(48,73) 1.0901 estimate D2E/DX2 !
! R76 R(49,56) 1.429 estimate D2E/DX2 !
! R77 R(50,51) 1.4296 estimate D2E/DX2 !
! R78 R(51,52) 1.3869 estimate D2E/DX2 !
! R79 R(52,53) 1.409 estimate D2E/DX2 !
! R80 R(52,74) 1.0797 estimate D2E/DX2 !
! R81 R(54,55) 1.4071 estimate D2E/DX2 !
! R82 R(55,56) 1.3893 estimate D2E/DX2 !
! R83 R(55,75) 1.0797 estimate D2E/DX2 !
! A1 A(2,1,5) 120.5599 estimate D2E/DX2 !
! A2 A(2,1,16) 123.807 estimate D2E/DX2 !
! A3 A(5,1,16) 115.585 estimate D2E/DX2 !
! A4 A(1,2,3) 120.9255 estimate D2E/DX2 !
! A5 A(1,2,8) 118.1516 estimate D2E/DX2 !
! A6 A(3,2,8) 120.9219 estimate D2E/DX2 !
! A7 A(2,3,4) 119.8416 estimate D2E/DX2 !
! A8 A(2,3,9) 121.6783 estimate D2E/DX2 !
! A9 A(4,3,9) 118.3513 estimate D2E/DX2 !
! A10 A(3,4,17) 120.4729 estimate D2E/DX2 !
! A11 A(3,4,18) 121.7277 estimate D2E/DX2 !
! A12 A(17,4,18) 117.7974 estimate D2E/DX2 !
! A13 A(1,5,6) 121.1175 estimate D2E/DX2 !
! A14 A(1,5,24) 117.3804 estimate D2E/DX2 !
! A15 A(6,5,24) 121.497 estimate D2E/DX2 !
! A16 A(5,6,7) 120.3437 estimate D2E/DX2 !
! A17 A(5,6,25) 120.4682 estimate D2E/DX2 !
! A18 A(7,6,25) 119.1503 estimate D2E/DX2 !
! A19 A(6,7,8) 118.8564 estimate D2E/DX2 !
! A20 A(6,7,13) 121.4639 estimate D2E/DX2 !
! A21 A(8,7,13) 119.6749 estimate D2E/DX2 !
! A22 A(2,8,7) 120.0388 estimate D2E/DX2 !
! A23 A(2,8,23) 122.2693 estimate D2E/DX2 !
! A24 A(7,8,23) 117.6624 estimate D2E/DX2 !
! A25 A(3,9,10) 119.4658 estimate D2E/DX2 !
! A26 A(3,9,19) 122.813 estimate D2E/DX2 !
! A27 A(10,9,19) 117.6397 estimate D2E/DX2 !
! A28 A(9,10,11) 119.3299 estimate D2E/DX2 !
! A29 A(9,10,12) 119.5855 estimate D2E/DX2 !
! A30 A(11,10,12) 121.062 estimate D2E/DX2 !
! A31 A(10,11,18) 120.4145 estimate D2E/DX2 !
! A32 A(10,11,26) 118.9923 estimate D2E/DX2 !
! A33 A(18,11,26) 120.5599 estimate D2E/DX2 !
! A34 A(10,12,21) 121.0386 estimate D2E/DX2 !
! A35 A(10,12,27) 118.3928 estimate D2E/DX2 !
! A36 A(21,12,27) 120.5616 estimate D2E/DX2 !
! A37 A(7,13,14) 121.0158 estimate D2E/DX2 !
! A38 A(7,13,28) 118.4332 estimate D2E/DX2 !
! A39 A(14,13,28) 120.5459 estimate D2E/DX2 !
! A40 A(13,14,22) 119.5727 estimate D2E/DX2 !
! A41 A(13,14,29) 120.4388 estimate D2E/DX2 !
! A42 A(22,14,29) 119.9826 estimate D2E/DX2 !
! A43 A(16,15,17) 113.7867 estimate D2E/DX2 !
! A44 A(16,15,39) 106.1338 estimate D2E/DX2 !
! A45 A(16,15,41) 113.1719 estimate D2E/DX2 !
! A46 A(17,15,39) 112.7456 estimate D2E/DX2 !
! A47 A(17,15,41) 103.9525 estimate D2E/DX2 !
! A48 A(39,15,41) 106.9987 estimate D2E/DX2 !
! A49 A(1,16,15) 125.0366 estimate D2E/DX2 !
! A50 A(4,17,15) 117.0157 estimate D2E/DX2 !
! A51 A(4,18,11) 120.3366 estimate D2E/DX2 !
! A52 A(4,18,30) 117.962 estimate D2E/DX2 !
! A53 A(11,18,30) 121.7009 estimate D2E/DX2 !
! A54 A(9,19,20) 121.3133 estimate D2E/DX2 !
! A55 A(9,19,31) 119.161 estimate D2E/DX2 !
! A56 A(20,19,31) 119.5222 estimate D2E/DX2 !
! A57 A(19,20,21) 120.7285 estimate D2E/DX2 !
! A58 A(19,20,32) 119.6363 estimate D2E/DX2 !
! A59 A(21,20,32) 119.6339 estimate D2E/DX2 !
! A60 A(12,21,20) 119.5946 estimate D2E/DX2 !
! A61 A(12,21,33) 120.4373 estimate D2E/DX2 !
! A62 A(20,21,33) 119.9581 estimate D2E/DX2 !
! A63 A(14,22,23) 120.7014 estimate D2E/DX2 !
! A64 A(14,22,34) 119.6529 estimate D2E/DX2 !
! A65 A(23,22,34) 119.6449 estimate D2E/DX2 !
! A66 A(8,23,22) 121.3162 estimate D2E/DX2 !
! A67 A(8,23,35) 119.0909 estimate D2E/DX2 !
! A68 A(22,23,35) 119.5888 estimate D2E/DX2 !
! A69 A(37,36,47) 120.1093 estimate D2E/DX2 !
! A70 A(37,36,57) 120.3515 estimate D2E/DX2 !
! A71 A(47,36,57) 119.539 estimate D2E/DX2 !
! A72 A(36,37,44) 120.1021 estimate D2E/DX2 !
! A73 A(36,37,58) 119.7546 estimate D2E/DX2 !
! A74 A(44,37,58) 120.1433 estimate D2E/DX2 !
! A75 A(47,38,49) 119.2809 estimate D2E/DX2 !
! A76 A(47,38,50) 119.2625 estimate D2E/DX2 !
! A77 A(49,38,50) 121.4548 estimate D2E/DX2 !
! A78 A(15,39,50) 122.862 estimate D2E/DX2 !
! A79 A(15,39,53) 128.8516 estimate D2E/DX2 !
! A80 A(50,39,53) 107.932 estimate D2E/DX2 !
! A81 A(51,40,59) 111.8038 estimate D2E/DX2 !
! A82 A(51,40,60) 111.821 estimate D2E/DX2 !
! A83 A(51,40,61) 109.5951 estimate D2E/DX2 !
! A84 A(59,40,60) 106.684 estimate D2E/DX2 !
! A85 A(59,40,61) 108.3356 estimate D2E/DX2 !
! A86 A(60,40,61) 108.4638 estimate D2E/DX2 !
! A87 A(15,41,49) 123.6687 estimate D2E/DX2 !
! A88 A(15,41,54) 127.0189 estimate D2E/DX2 !
! A89 A(49,41,54) 108.0606 estimate D2E/DX2 !
! A90 A(53,42,62) 108.789 estimate D2E/DX2 !
! A91 A(53,42,63) 111.0098 estimate D2E/DX2 !
! A92 A(53,42,64) 111.9524 estimate D2E/DX2 !
! A93 A(62,42,63) 107.4854 estimate D2E/DX2 !
! A94 A(62,42,64) 109.58 estimate D2E/DX2 !
! A95 A(63,42,64) 107.9187 estimate D2E/DX2 !
! A96 A(56,43,65) 109.602 estimate D2E/DX2 !
! A97 A(56,43,66) 111.9521 estimate D2E/DX2 !
! A98 A(56,43,67) 111.6926 estimate D2E/DX2 !
! A99 A(65,43,66) 108.4901 estimate D2E/DX2 !
! A100 A(65,43,67) 108.2576 estimate D2E/DX2 !
! A101 A(66,43,67) 106.7062 estimate D2E/DX2 !
! A102 A(37,44,45) 119.8703 estimate D2E/DX2 !
! A103 A(37,44,68) 120.064 estimate D2E/DX2 !
! A104 A(45,44,68) 120.0657 estimate D2E/DX2 !
! A105 A(44,45,46) 120.0816 estimate D2E/DX2 !
! A106 A(44,45,69) 120.1524 estimate D2E/DX2 !
! A107 A(46,45,69) 119.766 estimate D2E/DX2 !
! A108 A(45,46,47) 120.1159 estimate D2E/DX2 !
! A109 A(45,46,70) 120.3803 estimate D2E/DX2 !
! A110 A(47,46,70) 119.5038 estimate D2E/DX2 !
! A111 A(36,47,38) 120.392 estimate D2E/DX2 !
! A112 A(36,47,46) 119.7204 estimate D2E/DX2 !
! A113 A(38,47,46) 119.8875 estimate D2E/DX2 !
! A114 A(54,48,71) 111.5801 estimate D2E/DX2 !
! A115 A(54,48,72) 111.2465 estimate D2E/DX2 !
! A116 A(54,48,73) 109.405 estimate D2E/DX2 !
! A117 A(71,48,72) 107.3386 estimate D2E/DX2 !
! A118 A(71,48,73) 108.0101 estimate D2E/DX2 !
! A119 A(72,48,73) 109.168 estimate D2E/DX2 !
! A120 A(38,49,41) 120.8291 estimate D2E/DX2 !
! A121 A(38,49,56) 130.9278 estimate D2E/DX2 !
! A122 A(41,49,56) 108.1785 estimate D2E/DX2 !
! A123 A(38,50,39) 120.8852 estimate D2E/DX2 !
! A124 A(38,50,51) 130.4788 estimate D2E/DX2 !
! A125 A(39,50,51) 108.2676 estimate D2E/DX2 !
! A126 A(40,51,50) 129.3744 estimate D2E/DX2 !
! A127 A(40,51,52) 124.7072 estimate D2E/DX2 !
! A128 A(50,51,52) 105.9025 estimate D2E/DX2 !
! A129 A(51,52,53) 108.8869 estimate D2E/DX2 !
! A130 A(51,52,74) 126.4225 estimate D2E/DX2 !
! A131 A(53,52,74) 124.6835 estimate D2E/DX2 !
! A132 A(39,53,42) 126.7405 estimate D2E/DX2 !
! A133 A(39,53,52) 108.9943 estimate D2E/DX2 !
! A134 A(42,53,52) 124.264 estimate D2E/DX2 !
! A135 A(41,54,48) 124.9904 estimate D2E/DX2 !
! A136 A(41,54,55) 109.1284 estimate D2E/DX2 !
! A137 A(48,54,55) 125.8567 estimate D2E/DX2 !
! A138 A(54,55,56) 108.6555 estimate D2E/DX2 !
! A139 A(54,55,75) 124.8942 estimate D2E/DX2 !
! A140 A(56,55,75) 126.4461 estimate D2E/DX2 !
! A141 A(43,56,49) 129.3564 estimate D2E/DX2 !
! A142 A(43,56,55) 124.7079 estimate D2E/DX2 !
! A143 A(49,56,55) 105.9356 estimate D2E/DX2 !
! D1 D(5,1,2,3) 168.4221 estimate D2E/DX2 !
! D2 D(5,1,2,8) -11.225 estimate D2E/DX2 !
! D3 D(16,1,2,3) -8.9424 estimate D2E/DX2 !
! D4 D(16,1,2,8) 171.4105 estimate D2E/DX2 !
! D5 D(2,1,5,6) 5.6613 estimate D2E/DX2 !
! D6 D(2,1,5,24) -175.1476 estimate D2E/DX2 !
! D7 D(16,1,5,6) -176.7665 estimate D2E/DX2 !
! D8 D(16,1,5,24) 2.4246 estimate D2E/DX2 !
! D9 D(2,1,16,15) -46.8244 estimate D2E/DX2 !
! D10 D(5,1,16,15) 135.6916 estimate D2E/DX2 !
! D11 D(1,2,3,4) 50.0299 estimate D2E/DX2 !
! D12 D(1,2,3,9) -125.775 estimate D2E/DX2 !
! D13 D(8,2,3,4) -130.3328 estimate D2E/DX2 !
! D14 D(8,2,3,9) 53.8623 estimate D2E/DX2 !
! D15 D(1,2,8,7) 9.1935 estimate D2E/DX2 !
! D16 D(1,2,8,23) -168.7844 estimate D2E/DX2 !
! D17 D(3,2,8,7) -170.4536 estimate D2E/DX2 !
! D18 D(3,2,8,23) 11.5685 estimate D2E/DX2 !
! D19 D(2,3,4,17) -3.0314 estimate D2E/DX2 !
! D20 D(2,3,4,18) 177.4888 estimate D2E/DX2 !
! D21 D(9,3,4,17) 172.9121 estimate D2E/DX2 !
! D22 D(9,3,4,18) -6.5676 estimate D2E/DX2 !
! D23 D(2,3,9,10) -177.6373 estimate D2E/DX2 !
! D24 D(2,3,9,19) 5.7244 estimate D2E/DX2 !
! D25 D(4,3,9,10) 6.4974 estimate D2E/DX2 !
! D26 D(4,3,9,19) -170.1409 estimate D2E/DX2 !
! D27 D(3,4,17,15) -68.9789 estimate D2E/DX2 !
! D28 D(18,4,17,15) 110.5209 estimate D2E/DX2 !
! D29 D(3,4,18,11) 2.1014 estimate D2E/DX2 !
! D30 D(3,4,18,30) -178.1299 estimate D2E/DX2 !
! D31 D(17,4,18,11) -177.3918 estimate D2E/DX2 !
! D32 D(17,4,18,30) 2.377 estimate D2E/DX2 !
! D33 D(1,5,6,7) 2.3311 estimate D2E/DX2 !
! D34 D(1,5,6,25) -179.926 estimate D2E/DX2 !
! D35 D(24,5,6,7) -176.8265 estimate D2E/DX2 !
! D36 D(24,5,6,25) 0.9164 estimate D2E/DX2 !
! D37 D(5,6,7,8) -4.2288 estimate D2E/DX2 !
! D38 D(5,6,7,13) 174.9649 estimate D2E/DX2 !
! D39 D(25,6,7,8) 177.9988 estimate D2E/DX2 !
! D40 D(25,6,7,13) -2.8075 estimate D2E/DX2 !
! D41 D(6,7,8,2) -1.5712 estimate D2E/DX2 !
! D42 D(6,7,8,23) 176.4984 estimate D2E/DX2 !
! D43 D(13,7,8,2) 179.2204 estimate D2E/DX2 !
! D44 D(13,7,8,23) -2.71 estimate D2E/DX2 !
! D45 D(6,7,13,14) -177.5673 estimate D2E/DX2 !
! D46 D(6,7,13,28) 1.617 estimate D2E/DX2 !
! D47 D(8,7,13,14) 1.6199 estimate D2E/DX2 !
! D48 D(8,7,13,28) -179.1958 estimate D2E/DX2 !
! D49 D(2,8,23,22) 179.8232 estimate D2E/DX2 !
! D50 D(2,8,23,35) 0.5656 estimate D2E/DX2 !
! D51 D(7,8,23,22) 1.7996 estimate D2E/DX2 !
! D52 D(7,8,23,35) -177.458 estimate D2E/DX2 !
! D53 D(3,9,10,11) -2.1265 estimate D2E/DX2 !
! D54 D(3,9,10,12) 179.5847 estimate D2E/DX2 !
! D55 D(19,9,10,11) 174.6844 estimate D2E/DX2 !
! D56 D(19,9,10,12) -3.6043 estimate D2E/DX2 !
! D57 D(3,9,19,20) 179.3265 estimate D2E/DX2 !
! D58 D(3,9,19,31) 0.0111 estimate D2E/DX2 !
! D59 D(10,9,19,20) 2.6303 estimate D2E/DX2 !
! D60 D(10,9,19,31) -176.6851 estimate D2E/DX2 !
! D61 D(9,10,11,18) -2.4176 estimate D2E/DX2 !
! D62 D(9,10,11,26) 179.6678 estimate D2E/DX2 !
! D63 D(12,10,11,18) 175.8451 estimate D2E/DX2 !
! D64 D(12,10,11,26) -2.0695 estimate D2E/DX2 !
! D65 D(9,10,12,21) 1.9819 estimate D2E/DX2 !
! D66 D(9,10,12,27) -178.9737 estimate D2E/DX2 !
! D67 D(11,10,12,21) -176.2765 estimate D2E/DX2 !
! D68 D(11,10,12,27) 2.7679 estimate D2E/DX2 !
! D69 D(10,11,18,4) 2.525 estimate D2E/DX2 !
! D70 D(10,11,18,30) -177.235 estimate D2E/DX2 !
! D71 D(26,11,18,4) -179.5933 estimate D2E/DX2 !
! D72 D(26,11,18,30) 0.6467 estimate D2E/DX2 !
! D73 D(10,12,21,20) 0.7513 estimate D2E/DX2 !
! D74 D(10,12,21,33) 179.5997 estimate D2E/DX2 !
! D75 D(27,12,21,20) -178.2724 estimate D2E/DX2 !
! D76 D(27,12,21,33) 0.576 estimate D2E/DX2 !
! D77 D(7,13,14,22) 0.4802 estimate D2E/DX2 !
! D78 D(7,13,14,29) 179.5975 estimate D2E/DX2 !
! D79 D(28,13,14,22) -178.6869 estimate D2E/DX2 !
! D80 D(28,13,14,29) 0.4304 estimate D2E/DX2 !
! D81 D(13,14,22,23) -1.4419 estimate D2E/DX2 !
! D82 D(13,14,22,34) 178.212 estimate D2E/DX2 !
! D83 D(29,14,22,23) 179.4367 estimate D2E/DX2 !
! D84 D(29,14,22,34) -0.9094 estimate D2E/DX2 !
! D85 D(17,15,16,1) 20.1144 estimate D2E/DX2 !
! D86 D(39,15,16,1) 144.6809 estimate D2E/DX2 !
! D87 D(41,15,16,1) -98.2633 estimate D2E/DX2 !
! D88 D(16,15,17,4) 57.0773 estimate D2E/DX2 !
! D89 D(39,15,17,4) -63.8586 estimate D2E/DX2 !
! D90 D(41,15,17,4) -179.377 estimate D2E/DX2 !
! D91 D(16,15,39,50) 141.8685 estimate D2E/DX2 !
! D92 D(16,15,39,53) -45.819 estimate D2E/DX2 !
! D93 D(17,15,39,50) -92.9231 estimate D2E/DX2 !
! D94 D(17,15,39,53) 79.3894 estimate D2E/DX2 !
! D95 D(41,15,39,50) 20.7527 estimate D2E/DX2 !
! D96 D(41,15,39,53) -166.9349 estimate D2E/DX2 !
! D97 D(16,15,41,49) -134.222 estimate D2E/DX2 !
! D98 D(16,15,41,54) 60.1155 estimate D2E/DX2 !
! D99 D(17,15,41,49) 101.8326 estimate D2E/DX2 !
! D100 D(17,15,41,54) -63.8299 estimate D2E/DX2 !
! D101 D(39,15,41,49) -17.6755 estimate D2E/DX2 !
! D102 D(39,15,41,54) 176.662 estimate D2E/DX2 !
! D103 D(9,19,20,21) 0.0468 estimate D2E/DX2 !
! D104 D(9,19,20,32) -179.5403 estimate D2E/DX2 !
! D105 D(31,19,20,21) 179.3598 estimate D2E/DX2 !
! D106 D(31,19,20,32) -0.2273 estimate D2E/DX2 !
! D107 D(19,20,21,12) -1.7959 estimate D2E/DX2 !
! D108 D(19,20,21,33) 179.3501 estimate D2E/DX2 !
! D109 D(32,20,21,12) 177.7912 estimate D2E/DX2 !
! D110 D(32,20,21,33) -1.0628 estimate D2E/DX2 !
! D111 D(14,22,23,8) 0.2626 estimate D2E/DX2 !
! D112 D(14,22,23,35) 179.5166 estimate D2E/DX2 !
! D113 D(34,22,23,8) -179.3914 estimate D2E/DX2 !
! D114 D(34,22,23,35) -0.1374 estimate D2E/DX2 !
! D115 D(47,36,37,44) -0.1753 estimate D2E/DX2 !
! D116 D(47,36,37,58) 179.8657 estimate D2E/DX2 !
! D117 D(57,36,37,44) 179.9783 estimate D2E/DX2 !
! D118 D(57,36,37,58) 0.0192 estimate D2E/DX2 !
! D119 D(37,36,47,38) -179.8485 estimate D2E/DX2 !
! D120 D(37,36,47,46) 0.0727 estimate D2E/DX2 !
! D121 D(57,36,47,38) -0.0008 estimate D2E/DX2 !
! D122 D(57,36,47,46) 179.9204 estimate D2E/DX2 !
! D123 D(36,37,44,45) 0.0926 estimate D2E/DX2 !
! D124 D(36,37,44,68) -179.8952 estimate D2E/DX2 !
! D125 D(58,37,44,45) -179.9485 estimate D2E/DX2 !
! D126 D(58,37,44,68) 0.0636 estimate D2E/DX2 !
! D127 D(49,38,47,36) -85.8327 estimate D2E/DX2 !
! D128 D(49,38,47,46) 94.2462 estimate D2E/DX2 !
! D129 D(50,38,47,36) 93.6757 estimate D2E/DX2 !
! D130 D(50,38,47,46) -86.2454 estimate D2E/DX2 !
! D131 D(47,38,49,41) -177.7017 estimate D2E/DX2 !
! D132 D(47,38,49,56) -0.9942 estimate D2E/DX2 !
! D133 D(50,38,49,41) 2.8011 estimate D2E/DX2 !
! D134 D(50,38,49,56) 179.5085 estimate D2E/DX2 !
! D135 D(47,38,50,39) -179.0754 estimate D2E/DX2 !
! D136 D(47,38,50,51) -6.9139 estimate D2E/DX2 !
! D137 D(49,38,50,39) 0.422 estimate D2E/DX2 !
! D138 D(49,38,50,51) 172.5835 estimate D2E/DX2 !
! D139 D(15,39,50,38) -13.9033 estimate D2E/DX2 !
! D140 D(15,39,50,51) 172.3684 estimate D2E/DX2 !
! D141 D(53,39,50,38) 172.383 estimate D2E/DX2 !
! D142 D(53,39,50,51) -1.3453 estimate D2E/DX2 !
! D143 D(15,39,53,42) 8.2737 estimate D2E/DX2 !
! D144 D(15,39,53,52) -172.1174 estimate D2E/DX2 !
! D145 D(50,39,53,42) -178.5089 estimate D2E/DX2 !
! D146 D(50,39,53,52) 1.1 estimate D2E/DX2 !
! D147 D(59,40,51,50) -61.0363 estimate D2E/DX2 !
! D148 D(59,40,51,52) 117.3097 estimate D2E/DX2 !
! D149 D(60,40,51,50) 58.5186 estimate D2E/DX2 !
! D150 D(60,40,51,52) -123.1354 estimate D2E/DX2 !
! D151 D(61,40,51,50) 178.8272 estimate D2E/DX2 !
! D152 D(61,40,51,52) -2.8268 estimate D2E/DX2 !
! D153 D(15,41,49,38) 7.5094 estimate D2E/DX2 !
! D154 D(15,41,49,56) -169.8728 estimate D2E/DX2 !
! D155 D(54,41,49,38) 175.5062 estimate D2E/DX2 !
! D156 D(54,41,49,56) -1.876 estimate D2E/DX2 !
! D157 D(15,41,54,48) -8.7084 estimate D2E/DX2 !
! D158 D(15,41,54,55) 169.5769 estimate D2E/DX2 !
! D159 D(49,41,54,48) -176.1887 estimate D2E/DX2 !
! D160 D(49,41,54,55) 2.0966 estimate D2E/DX2 !
! D161 D(62,42,53,39) 153.6856 estimate D2E/DX2 !
! D162 D(62,42,53,52) -25.8669 estimate D2E/DX2 !
! D163 D(63,42,53,39) -88.2384 estimate D2E/DX2 !
! D164 D(63,42,53,52) 92.2091 estimate D2E/DX2 !
! D165 D(64,42,53,39) 32.4348 estimate D2E/DX2 !
! D166 D(64,42,53,52) -147.1177 estimate D2E/DX2 !
! D167 D(65,43,56,49) -176.1175 estimate D2E/DX2 !
! D168 D(65,43,56,55) 3.7687 estimate D2E/DX2 !
! D169 D(66,43,56,49) -55.6862 estimate D2E/DX2 !
! D170 D(66,43,56,55) 124.1999 estimate D2E/DX2 !
! D171 D(67,43,56,49) 63.9105 estimate D2E/DX2 !
! D172 D(67,43,56,55) -116.2033 estimate D2E/DX2 !
! D173 D(37,44,45,46) 0.0925 estimate D2E/DX2 !
! D174 D(37,44,45,69) -179.988 estimate D2E/DX2 !
! D175 D(68,44,45,46) -179.9197 estimate D2E/DX2 !
! D176 D(68,44,45,69) -0.0001 estimate D2E/DX2 !
! D177 D(44,45,46,47) -0.1951 estimate D2E/DX2 !
! D178 D(44,45,46,70) 179.8413 estimate D2E/DX2 !
! D179 D(69,45,46,47) 179.8851 estimate D2E/DX2 !
! D180 D(69,45,46,70) -0.0786 estimate D2E/DX2 !
! D181 D(45,46,47,36) 0.1123 estimate D2E/DX2 !
! D182 D(45,46,47,38) -179.9661 estimate D2E/DX2 !
! D183 D(70,46,47,36) -179.9238 estimate D2E/DX2 !
! D184 D(70,46,47,38) -0.0021 estimate D2E/DX2 !
! D185 D(71,48,54,41) -76.1154 estimate D2E/DX2 !
! D186 D(71,48,54,55) 105.8836 estimate D2E/DX2 !
! D187 D(72,48,54,41) 43.7284 estimate D2E/DX2 !
! D188 D(72,48,54,55) -134.2726 estimate D2E/DX2 !
! D189 D(73,48,54,41) 164.4229 estimate D2E/DX2 !
! D190 D(73,48,54,55) -13.5781 estimate D2E/DX2 !
! D191 D(38,49,56,43) 3.793 estimate D2E/DX2 !
! D192 D(38,49,56,55) -176.1097 estimate D2E/DX2 !
! D193 D(41,49,56,43) -179.1825 estimate D2E/DX2 !
! D194 D(41,49,56,55) 0.9148 estimate D2E/DX2 !
! D195 D(38,50,51,40) 6.7224 estimate D2E/DX2 !
! D196 D(38,50,51,52) -171.8638 estimate D2E/DX2 !
! D197 D(39,50,51,40) 179.6425 estimate D2E/DX2 !
! D198 D(39,50,51,52) 1.0563 estimate D2E/DX2 !
! D199 D(40,51,52,53) -179.0627 estimate D2E/DX2 !
! D200 D(40,51,52,74) -0.0026 estimate D2E/DX2 !
! D201 D(50,51,52,53) -0.3921 estimate D2E/DX2 !
! D202 D(50,51,52,74) 178.668 estimate D2E/DX2 !
! D203 D(51,52,53,39) -0.4391 estimate D2E/DX2 !
! D204 D(51,52,53,42) 179.1817 estimate D2E/DX2 !
! D205 D(74,52,53,39) -179.5194 estimate D2E/DX2 !
! D206 D(74,52,53,42) 0.1014 estimate D2E/DX2 !
! D207 D(41,54,55,56) -1.5388 estimate D2E/DX2 !
! D208 D(41,54,55,75) 179.1659 estimate D2E/DX2 !
! D209 D(48,54,55,56) 176.7279 estimate D2E/DX2 !
! D210 D(48,54,55,75) -2.5674 estimate D2E/DX2 !
! D211 D(54,55,56,43) -179.5637 estimate D2E/DX2 !
! D212 D(54,55,56,49) 0.3448 estimate D2E/DX2 !
! D213 D(75,55,56,43) -0.2822 estimate D2E/DX2 !
! D214 D(75,55,56,49) 179.6263 estimate D2E/DX2 !
--------------------------------------------------------------------------------
Trust Radius=3.00D-01 FncErr=1.00D-07 GrdErr=1.00D-06
Number of steps in this run= 450 maximum allowed number of steps= 450.
GradGradGradGradGradGradGradGradGradGradGradGradGradGradGradGradGradGrad
Leave Link 103 at Sun May 28 01:46:52 2023, MaxMem= 4294967296 cpu: 0.6
(Enter /public/apps/gs/g09/l202.exe)
Symmetry turned off by external request.
Stoichiometry C39H31BN2O2
Framework group C1[X(C39H31BN2O2)]
Deg. of freedom 219
Full point group C1 NOp 1
Input orientation:
---------------------------------------------------------------------
Center Atomic Atomic Coordinates (Angstroms)
Number Number Type X Y Z
---------------------------------------------------------------------
1 6 0 -1.794577 1.231657 -1.117903
2 6 0 -2.683558 0.650632 -0.219380
3 6 0 -2.366929 -0.641117 0.439593
4 6 0 -1.142088 -0.815143 1.062286
5 6 0 -2.197133 2.327304 -1.924626
6 6 0 -3.421520 2.912023 -1.761704
7 6 0 -4.300348 2.462854 -0.742628
8 6 0 -3.920917 1.332268 0.047327
9 6 0 -3.264804 -1.759767 0.376538
10 6 0 -2.935411 -2.967821 1.072401
11 6 0 -1.705340 -3.052200 1.774319
12 6 0 -3.825103 -4.071809 1.019084
13 6 0 -5.530081 3.119117 -0.483705
14 6 0 -6.351252 2.706781 0.537764
15 5 0 0.420735 0.438257 -0.274417
16 8 0 -0.534679 0.782885 -1.327794
17 8 0 -0.202344 0.166867 1.022083
18 6 0 -0.818912 -2.009572 1.746881
19 6 0 -4.449354 -1.753356 -0.409085
20 6 0 -5.280335 -2.847133 -0.457522
21 6 0 -4.979265 -4.015721 0.277556
22 6 0 -5.961222 1.618846 1.349801
23 6 0 -4.783604 0.950578 1.110061
24 1 0 -1.491266 2.688266 -2.662913
25 1 0 -3.718828 3.748020 -2.384848
26 1 0 -1.464017 -3.967138 2.303613
27 1 0 -3.564680 -4.970993 1.566858
28 1 0 -5.804001 3.966106 -1.103521
29 1 0 -7.286102 3.219283 0.731499
30 1 0 0.144472 -2.068503 2.238312
31 1 0 -4.692968 -0.873562 -0.987206
32 1 0 -6.172979 -2.815324 -1.071591
33 1 0 -5.648586 -4.866954 0.238568
34 1 0 -6.594177 1.310957 2.174163
35 1 0 -4.498702 0.125090 1.747883
36 6 0 5.764864 0.274007 -0.883293
37 6 0 7.128890 0.086264 -0.676290
38 6 0 3.391867 0.131281 -0.099127
39 7 0 1.246226 -0.778219 -0.816314
40 6 0 4.374163 -2.861423 -1.045636
41 7 0 1.439087 1.581797 0.029374
42 6 0 -0.588288 -2.170027 -1.901016
43 6 0 4.833441 2.888648 0.986716
44 6 0 7.587217 -0.436202 0.531922
45 6 0 6.677056 -0.772493 1.532629
46 6 0 5.312400 -0.588802 1.325357
47 6 0 4.852007 -0.063700 0.116772
48 6 0 -0.212231 3.416279 0.540496
49 6 0 2.821100 1.375527 0.175607
50 6 0 2.625995 -0.930526 -0.581386
51 6 0 3.021433 -2.220238 -1.054573
52 6 0 1.876816 -2.798705 -1.582531
53 6 0 0.801543 -1.900371 -1.433755
54 6 0 1.154588 2.833952 0.455004
55 6 0 2.348333 3.473523 0.836823
56 6 0 3.401394 2.581710 0.676012
57 1 0 5.404153 0.680200 -1.820842
58 1 0 7.832426 0.348408 -1.457508
59 1 0 5.097944 -2.289581 -1.630122
60 1 0 4.779328 -2.939821 -0.035145
61 1 0 4.306468 -3.864403 -1.469532
62 1 0 -0.549368 -2.881102 -2.727788
63 1 0 -1.187427 -2.621869 -1.107510
64 1 0 -1.091070 -1.263275 -2.224199
65 1 0 4.908370 3.888111 1.417721
66 1 0 5.259903 2.174169 1.693146
67 1 0 5.457104 2.854738 0.090854
68 1 0 8.648929 -0.580458 0.692988
69 1 0 7.028329 -1.178790 2.473677
70 1 0 4.600485 -0.850949 2.098928
71 1 0 -0.591055 3.698052 -0.444140
72 1 0 -0.918663 2.704935 0.969067
73 1 0 -0.185977 4.312429 1.160635
74 1 0 1.806106 -3.769726 -2.049370
75 1 0 2.416154 4.486584 1.203944
---------------------------------------------------------------------
Rotational constants (GHZ): 0.1527392 0.0553806 0.0453053
Leave Link 202 at Sun May 28 01:46:52 2023, MaxMem= 4294967296 cpu: 1.2
(Enter /public/apps/gs/g09/l301.exe)
Standard basis: 6-311G(d,p) (5D, 7F)
Ernie: Thresh= 0.10000D-02 Tol= 0.10000D-05 Strict=F.
The following finite field(s) will be applied:
An electric field of 0.0000 -0.0020 0.0000
978 basis functions, 1656 primitive gaussians, 1022 cartesian basis functions
150 alpha electrons 150 beta electrons
nuclear repulsion energy 5188.9767310978 Hartrees.
IExCor= 402 DFT=T Ex+Corr=B3LYP ExCW=0 ScaHFX= 0.200000
ScaDFX= 0.800000 0.720000 1.000000 0.810000 ScalE2= 1.000000 1.000000
IRadAn= 0 IRanWt= -1 IRanGd= 0 ICorTp=0 IEmpDi=141
NAtoms= 75 NActive= 75 NUniq= 75 SFac= 1.00D+00 NAtFMM= 60 NAOKFM=T Big=T
Integral buffers will be 131072 words long.
Raffenetti 2 integral format.
Two-electron integral symmetry is turned off.
R6Disp: Grimme-D3(BJ) Dispersion energy= -0.2146226560 Hartrees.
Nuclear repulsion after empirical dispersion term = 5188.7621084418 Hartrees.
------------------------------------------------------------------------------
Polarizable Continuum Model (PCM)
=================================
Model : PCM (using non-symmetric T matrix).
Atomic radii : UFF (Universal Force Field).
Polarization charges : Total charges.
Charge compensation : None.
Solution method : On-the-fly selection.
Cavity type : Scaled VdW (van der Waals Surface) (Alpha=1.100).
Cavity algorithm : GePol (No added spheres)
Default sphere list used, NSphG= 75.
Lebedev-Laikov grids with approx. 5.0 points / Ang**2.
Smoothing algorithm: York/Karplus (Gamma=1.0000).
Polarization charges: spherical gaussians, with
point-specific exponents (IZeta= 3).
Self-potential: point-specific (ISelfS= 7).
Self-field : sphere-specific E.n sum rule (ISelfD= 2).
1st derivatives : Analytical E(r).r(x)/FMM algorithm (CHGder, D1EAlg=3).
Cavity 1st derivative terms included.
Solvent : Water, Eps= 78.355300 Eps(inf)= 1.777849
------------------------------------------------------------------------------
GePol: Number of generator spheres = 75
GePol: Total number of spheres = 75
GePol: Number of exposed spheres = 75 (100.00%)
GePol: Number of points = 4849
GePol: Average weight of points = 0.13
GePol: Minimum weight of points = 0.22D-10
GePol: Maximum weight of points = 0.20577
GePol: Number of points with low weight = 387
GePol: Fraction of low-weight points (<1% of avg) = 7.98%
GePol: Cavity surface area = 614.933 Ang**2
GePol: Cavity volume = 758.357 Ang**3
Leave Link 301 at Sun May 28 01:46:53 2023, MaxMem= 4294967296 cpu: 3.3
(Enter /public/apps/gs/g09/l302.exe)
NPDir=0 NMtPBC= 1 NCelOv= 1 NCel= 1 NClECP= 1 NCelD= 1
NCelK= 1 NCelE2= 1 NClLst= 1 CellRange= 0.0.
One-electron integrals computed using PRISM.
NBasis= 978 RedAO= T EigKep= 7.67D-05 NBF= 978
NBsUse= 978 1.00D-06 EigRej= -1.00D+00 NBFU= 978
Precomputing XC quadrature grid using
IXCGrd= 4 IRadAn= 0 IRanWt= -1 IRanGd= 0 AccXCQ= 0.00D+00.
Generated NRdTot= 0 NPtTot= 0 NUsed= 0 NTot= 32
NSgBfM= 944 949 958 958 959 MxSgAt= 75 MxSgA2= 75.
Leave Link 302 at Sun May 28 01:46:55 2023, MaxMem= 4294967296 cpu: 65.4
(Enter /public/apps/gs/g09/l303.exe)
DipDrv: MaxL=1.
The nuclear repulsion energy is now 5188.7621084531 hartrees.
Leave Link 303 at Sun May 28 01:46:55 2023, MaxMem= 4294967296 cpu: 5.0
(Enter /public/apps/gs/g09/l401.exe)
ExpMin= 9.89D-02 ExpMax= 8.59D+03 ExpMxC= 1.30D+03 IAcc=2 IRadAn= 4 AccDes= 0.00D+00
Harris functional with IExCor= 402 and IRadAn= 4 diagonalized for initial guess.
HarFok: IExCor= 402 AccDes= 0.00D+00 IRadAn= 4 IDoV= 1 UseB2=F ITyADJ=14
ICtDFT= 3500011 ScaDFX= 1.000000 1.000000 1.000000 1.000000
FoFCou: FMM=F IPFlag= 0 FMFlag= 100000 FMFlg1= 2001
NFxFlg= 0 DoJE=T BraDBF=F KetDBF=T FulRan=T
wScrn= 0.000000 ICntrl= 500 IOpCl= 0 I1Cent= 200000004 NGrid= 0
NMat0= 1 NMatS0= 1 NMatT0= 0 NMatD0= 1 NMtDS0= 0 NMtDT0= 0
Symmetry not used in FoFCou.
Harris En= -1790.52276690540
JPrj=0 DoOrth=F DoCkMO=F.
Leave Link 401 at Sun May 28 01:46:58 2023, MaxMem= 4294967296 cpu: 96.1
(Enter /public/apps/gs/g09/l502.exe)
Closed shell SCF:
Using DIIS extrapolation, IDIIS= 1040.
Two-electron integral symmetry not used.
IVT= 3190988 IEndB= 3190988 NGot= 4294967296 MDV= 4292838455
LenX= 4292838455 LenY= 4291792949
Requested convergence on RMS density matrix=1.00D-08 within 128 cycles.
Requested convergence on MAX density matrix=1.00D-06.
Requested convergence on energy=1.00D-06.
No special actions if energy rises.
Fock matrices will be formed incrementally for 20 cycles.
Cycle 1 Pass 1 IDiag 1:
FoFJK: IHMeth= 1 ICntrl= 0 DoSepK=F KAlg= 0 I1Cent= 0 FoldK=F
IRaf= 680000000 NMat= 1 IRICut= 1 DoRegI=T DoRafI=F ISym2E= 0.
FoFCou: FMM=T IPFlag= 0 FMFlag= 100000 FMFlg1= 2001
NFxFlg= 0 DoJE=F BraDBF=F KetDBF=F FulRan=T
wScrn= 0.000000 ICntrl= 0 IOpCl= 0 I1Cent= 0 NGrid= 0
NMat0= 1 NMatS0= 1 NMatT0= 0 NMatD0= 1 NMtDS0= 0 NMtDT0= 0
Symmetry not used in FoFCou.
FMM levels: 10 Number of levels for PrismC: 9
Inv3: Mode=1 IEnd= 70538403.
Iteration 1 A*A^-1 deviation from unit magnitude is 6.99D-15 for 4829.
Iteration 1 A*A^-1 deviation from orthogonality is 7.02D-15 for 4824 4356.
Iteration 1 A^-1*A deviation from unit magnitude is 6.77D-15 for 4829.
Iteration 1 A^-1*A deviation from orthogonality is 2.83D-12 for 3904 3869.
E= -1789.45143893706
DIIS: error= 3.10D-02 at cycle 1 NSaved= 1.
NSaved= 1 IEnMin= 1 EnMin= -1789.45143893706 IErMin= 1 ErrMin= 3.10D-02
ErrMax= 3.10D-02 0.00D+00 EMaxC= 1.00D-01 BMatC= 1.10D+00 BMatP= 1.10D+00
IDIUse=3 WtCom= 6.90D-01 WtEn= 3.10D-01
Coeff-Com: 0.100D+01
Coeff-En: 0.100D+01
Coeff: 0.100D+01
Gap= 0.115 Goal= None Shift= 0.000
GapD= 0.115 DampG=1.000 DampE=0.500 DampFc=0.5000 IDamp=-1.
Damping current iteration by 5.00D-01
RMSDP=1.98D-03 MaxDP=1.42D-01 OVMax= 1.81D-01
Cycle 2 Pass 1 IDiag 1:
RMSU= 9.81D-04 CP: 9.79D-01
E= -1789.92137598659 Delta-E= -0.469937049528 Rises=F Damp=T
DIIS: error= 5.04D-03 at cycle 2 NSaved= 2.
NSaved= 2 IEnMin= 2 EnMin= -1789.92137598659 IErMin= 2 ErrMin= 5.04D-03
ErrMax= 5.04D-03 0.00D+00 EMaxC= 1.00D-01 BMatC= 6.66D-02 BMatP= 1.10D+00
IDIUse=3 WtCom= 9.50D-01 WtEn= 5.04D-02
Coeff-Com: -0.111D-01 0.101D+01
Coeff-En: 0.102D-01 0.990D+00
Coeff: -0.100D-01 0.101D+01
Gap= 0.120 Goal= None Shift= 0.000
RMSDP=5.40D-04 MaxDP=2.83D-02 DE=-4.70D-01 OVMax= 1.51D-01
Cycle 3 Pass 1 IDiag 1:
RMSU= 5.30D-04 CP: 9.75D-01 8.98D-01
E= -1790.38053171360 Delta-E= -0.459155727013 Rises=F Damp=F
DIIS: error= 1.17D-02 at cycle 3 NSaved= 3.
NSaved= 3 IEnMin= 3 EnMin= -1790.38053171360 IErMin= 2 ErrMin= 5.04D-03
ErrMax= 1.17D-02 0.00D+00 EMaxC= 1.00D-01 BMatC= 6.95D-02 BMatP= 6.66D-02
IDIUse=3 WtCom= 8.83D-01 WtEn= 1.17D-01
Coeff-Com: -0.644D-01 0.540D+00 0.524D+00
Coeff-En: 0.000D+00 0.000D+00 0.100D+01
Coeff: -0.569D-01 0.477D+00 0.580D+00
Gap= 0.113 Goal= None Shift= 0.000
RMSDP=4.16D-04 MaxDP=2.03D-02 DE=-4.59D-01 OVMax= 9.28D-02
Cycle 4 Pass 1 IDiag 1:
RMSU= 2.54D-04 CP: 9.77D-01 1.00D+00 4.08D-01
E= -1790.42313600201 Delta-E= -0.042604288408 Rises=F Damp=F
DIIS: error= 6.01D-03 at cycle 4 NSaved= 4.
NSaved= 4 IEnMin= 4 EnMin= -1790.42313600201 IErMin= 2 ErrMin= 5.04D-03
ErrMax= 6.01D-03 0.00D+00 EMaxC= 1.00D-01 BMatC= 2.57D-02 BMatP= 6.66D-02
IDIUse=3 WtCom= 9.40D-01 WtEn= 6.01D-02
Coeff-Com: -0.347D-01 0.156D+00 0.395D+00 0.484D+00
Coeff-En: 0.000D+00 0.000D+00 0.314D+00 0.686D+00
Coeff: -0.326D-01 0.146D+00 0.390D+00 0.496D+00
Gap= 0.108 Goal= None Shift= 0.000
RMSDP=1.80D-04 MaxDP=1.13D-02 DE=-4.26D-02 OVMax= 4.29D-02
Cycle 5 Pass 1 IDiag 1:
RMSU= 6.68D-05 CP: 9.75D-01 9.84D-01 6.14D-01 5.08D-01
E= -1790.44852311943 Delta-E= -0.025387117422 Rises=F Damp=F
DIIS: error= 9.46D-04 at cycle 5 NSaved= 5.
NSaved= 5 IEnMin= 5 EnMin= -1790.44852311943 IErMin= 5 ErrMin= 9.46D-04
ErrMax= 9.46D-04 0.00D+00 EMaxC= 1.00D-01 BMatC= 1.10D-03 BMatP= 2.57D-02
IDIUse=3 WtCom= 9.91D-01 WtEn= 9.46D-03
Coeff-Com: -0.138D-01 0.438D-01 0.181D+00 0.278D+00 0.511D+00
Coeff-En: 0.000D+00 0.000D+00 0.000D+00 0.000D+00 0.100D+01
Coeff: -0.136D-01 0.433D-01 0.179D+00 0.276D+00 0.516D+00
Gap= 0.109 Goal= None Shift= 0.000
RMSDP=3.83D-05 MaxDP=3.03D-03 DE=-2.54D-02 OVMax= 8.97D-03
Cycle 6 Pass 1 IDiag 1:
RMSU= 2.67D-05 CP: 9.75D-01 9.80D-01 6.16D-01 5.45D-01 6.21D-01
E= -1790.44942145942 Delta-E= -0.000898339995 Rises=F Damp=F
DIIS: error= 2.68D-04 at cycle 6 NSaved= 6.
NSaved= 6 IEnMin= 6 EnMin= -1790.44942145942 IErMin= 6 ErrMin= 2.68D-04
ErrMax= 2.68D-04 0.00D+00 EMaxC= 1.00D-01 BMatC= 1.15D-04 BMatP= 1.10D-03
IDIUse=3 WtCom= 9.97D-01 WtEn= 2.68D-03
Coeff-Com: -0.374D-02 0.686D-02 0.541D-01 0.967D-01 0.295D+00 0.551D+00
Coeff-En: 0.000D+00 0.000D+00 0.000D+00 0.000D+00 0.740D-01 0.926D+00
Coeff: -0.373D-02 0.684D-02 0.540D-01 0.964D-01 0.295D+00 0.552D+00
Gap= 0.109 Goal= None Shift= 0.000
RMSDP=1.38D-05 MaxDP=6.40D-04 DE=-8.98D-04 OVMax= 3.19D-03
Cycle 7 Pass 1 IDiag 1:
RMSU= 7.44D-06 CP: 9.75D-01 9.82D-01 6.20D-01 5.43D-01 6.91D-01
CP: 6.18D-01
E= -1790.44952379706 Delta-E= -0.000102337633 Rises=F Damp=F
DIIS: error= 1.09D-04 at cycle 7 NSaved= 7.
NSaved= 7 IEnMin= 7 EnMin= -1790.44952379706 IErMin= 7 ErrMin= 1.09D-04
ErrMax= 1.09D-04 0.00D+00 EMaxC= 1.00D-01 BMatC= 1.04D-05 BMatP= 1.15D-04
IDIUse=3 WtCom= 9.99D-01 WtEn= 1.09D-03
Coeff-Com: -0.126D-02 0.131D-02 0.193D-01 0.374D-01 0.137D+00 0.325D+00
Coeff-Com: 0.482D+00
Coeff-En: 0.000D+00 0.000D+00 0.000D+00 0.000D+00 0.000D+00 0.277D-01
Coeff-En: 0.972D+00
Coeff: -0.126D-02 0.131D-02 0.193D-01 0.373D-01 0.137D+00 0.324D+00
Coeff: 0.482D+00
Gap= 0.109 Goal= None Shift= 0.000
RMSDP=4.31D-06 MaxDP=2.39D-04 DE=-1.02D-04 OVMax= 1.02D-03
Cycle 8 Pass 1 IDiag 1:
RMSU= 2.65D-06 CP: 9.75D-01 9.82D-01 6.19D-01 5.47D-01 6.82D-01
CP: 6.44D-01 5.89D-01
E= -1790.44953427999 Delta-E= -0.000010482930 Rises=F Damp=F
DIIS: error= 3.16D-05 at cycle 8 NSaved= 8.
NSaved= 8 IEnMin= 8 EnMin= -1790.44953427999 IErMin= 8 ErrMin= 3.16D-05
ErrMax= 3.16D-05 0.00D+00 EMaxC= 1.00D-01 BMatC= 9.35D-07 BMatP= 1.04D-05
IDIUse=1 WtCom= 1.00D+00 WtEn= 0.00D+00
Coeff-Com: -0.162D-03-0.215D-03 0.366D-02 0.799D-02 0.374D-01 0.108D+00
Coeff-Com: 0.268D+00 0.576D+00
Coeff: -0.162D-03-0.215D-03 0.366D-02 0.799D-02 0.374D-01 0.108D+00
Coeff: 0.268D+00 0.576D+00
Gap= 0.109 Goal= None Shift= 0.000
RMSDP=1.67D-06 MaxDP=1.35D-04 DE=-1.05D-05 OVMax= 2.67D-04
Cycle 9 Pass 1 IDiag 1:
RMSU= 9.11D-07 CP: 9.75D-01 9.82D-01 6.19D-01 5.48D-01 6.87D-01
CP: 6.54D-01 6.25D-01 5.46D-01
E= -1790.44953505803 Delta-E= -0.000000778045 Rises=F Damp=F
DIIS: error= 9.56D-06 at cycle 9 NSaved= 9.
NSaved= 9 IEnMin= 9 EnMin= -1790.44953505803 IErMin= 9 ErrMin= 9.56D-06
ErrMax= 9.56D-06 0.00D+00 EMaxC= 1.00D-01 BMatC= 1.63D-07 BMatP= 9.35D-07
IDIUse=1 WtCom= 1.00D+00 WtEn= 0.00D+00
Coeff-Com: 0.711D-04-0.312D-03-0.396D-03-0.377D-03 0.411D-02 0.206D-01
Coeff-Com: 0.949D-01 0.347D+00 0.534D+00
Coeff: 0.711D-04-0.312D-03-0.396D-03-0.377D-03 0.411D-02 0.206D-01
Coeff: 0.949D-01 0.347D+00 0.534D+00
Gap= 0.109 Goal= None Shift= 0.000
RMSDP=5.40D-07 MaxDP=3.38D-05 DE=-7.78D-07 OVMax= 8.74D-05
Cycle 10 Pass 1 IDiag 1:
RMSU= 2.38D-07 CP: 9.75D-01 9.82D-01 6.19D-01 5.47D-01 6.87D-01
CP: 6.53D-01 6.36D-01 6.71D-01 6.69D-01
E= -1790.44953521100 Delta-E= -0.000000152972 Rises=F Damp=F
DIIS: error= 3.18D-06 at cycle 10 NSaved= 10.
NSaved=10 IEnMin=10 EnMin= -1790.44953521100 IErMin=10 ErrMin= 3.18D-06
ErrMax= 3.18D-06 0.00D+00 EMaxC= 1.00D-01 BMatC= 7.78D-09 BMatP= 1.63D-07
IDIUse=1 WtCom= 1.00D+00 WtEn= 0.00D+00
Coeff-Com: 0.417D-04-0.122D-03-0.397D-03-0.735D-03-0.445D-03 0.272D-02
Coeff-Com: 0.276D-01 0.127D+00 0.255D+00 0.590D+00
Coeff: 0.417D-04-0.122D-03-0.397D-03-0.735D-03-0.445D-03 0.272D-02
Coeff: 0.276D-01 0.127D+00 0.255D+00 0.590D+00
Gap= 0.109 Goal= None Shift= 0.000
RMSDP=1.11D-07 MaxDP=9.23D-06 DE=-1.53D-07 OVMax= 2.54D-05
Cycle 11 Pass 1 IDiag 1:
RMSU= 8.23D-08 CP: 9.75D-01 9.82D-01 6.19D-01 5.47D-01 6.87D-01
CP: 6.53D-01 6.40D-01 6.79D-01 7.01D-01 7.98D-01
E= -1790.44953521830 Delta-E= -0.000000007293 Rises=F Damp=F
DIIS: error= 1.18D-06 at cycle 11 NSaved= 11.
NSaved=11 IEnMin=11 EnMin= -1790.44953521830 IErMin=11 ErrMin= 1.18D-06
ErrMax= 1.18D-06 0.00D+00 EMaxC= 1.00D-01 BMatC= 1.06D-09 BMatP= 7.78D-09
IDIUse=1 WtCom= 1.00D+00 WtEn= 0.00D+00
Coeff-Com: 0.125D-04-0.241D-04-0.161D-03-0.367D-03-0.730D-03-0.962D-03
Coeff-Com: 0.310D-02 0.235D-01 0.659D-01 0.305D+00 0.605D+00
Coeff: 0.125D-04-0.241D-04-0.161D-03-0.367D-03-0.730D-03-0.962D-03
Coeff: 0.310D-02 0.235D-01 0.659D-01 0.305D+00 0.605D+00
Gap= 0.109 Goal= None Shift= 0.000
RMSDP=4.07D-08 MaxDP=3.47D-06 DE=-7.29D-09 OVMax= 1.91D-05
Cycle 12 Pass 1 IDiag 1:
RMSU= 2.80D-08 CP: 9.75D-01 9.82D-01 6.19D-01 5.47D-01 6.87D-01
CP: 6.53D-01 6.40D-01 6.79D-01 7.13D-01 8.68D-01
CP: 7.67D-01
E= -1790.44953521932 Delta-E= -0.000000001021 Rises=F Damp=F
DIIS: error= 4.84D-07 at cycle 12 NSaved= 12.
NSaved=12 IEnMin=12 EnMin= -1790.44953521932 IErMin=12 ErrMin= 4.84D-07
ErrMax= 4.84D-07 0.00D+00 EMaxC= 1.00D-01 BMatC= 1.46D-10 BMatP= 1.06D-09
IDIUse=1 WtCom= 1.00D+00 WtEn= 0.00D+00
Coeff-Com: 0.204D-05 0.424D-06-0.467D-04-0.130D-03-0.389D-03-0.900D-03
Coeff-Com: -0.173D-02-0.265D-02 0.668D-02 0.101D+00 0.335D+00 0.563D+00
Coeff: 0.204D-05 0.424D-06-0.467D-04-0.130D-03-0.389D-03-0.900D-03
Coeff: -0.173D-02-0.265D-02 0.668D-02 0.101D+00 0.335D+00 0.563D+00
Gap= 0.109 Goal= None Shift= 0.000
RMSDP=1.63D-08 MaxDP=1.30D-06 DE=-1.02D-09 OVMax= 3.84D-06
Cycle 13 Pass 1 IDiag 1:
RMSU= 1.08D-08 CP: 9.75D-01 9.82D-01 6.19D-01 5.47D-01 6.87D-01
CP: 6.53D-01 6.40D-01 6.80D-01 7.17D-01 8.80D-01
CP: 8.55D-01 7.54D-01
E= -1790.44953521946 Delta-E= -0.000000000138 Rises=F Damp=F
DIIS: error= 1.40D-07 at cycle 13 NSaved= 13.
NSaved=13 IEnMin=13 EnMin= -1790.44953521946 IErMin=13 ErrMin= 1.40D-07
ErrMax= 1.40D-07 0.00D+00 EMaxC= 1.00D-01 BMatC= 1.66D-11 BMatP= 1.46D-10
IDIUse=1 WtCom= 1.00D+00 WtEn= 0.00D+00
Coeff-Com: -0.818D-06 0.372D-05 0.177D-07-0.133D-04-0.929D-04-0.289D-03
Coeff-Com: -0.135D-02-0.483D-02-0.622D-02 0.690D-02 0.860D-01 0.289D+00
Coeff-Com: 0.631D+00
Coeff: -0.818D-06 0.372D-05 0.177D-07-0.133D-04-0.929D-04-0.289D-03
Coeff: -0.135D-02-0.483D-02-0.622D-02 0.690D-02 0.860D-01 0.289D+00
Coeff: 0.631D+00
Gap= 0.109 Goal= None Shift= 0.000
RMSDP=5.86D-09 MaxDP=3.55D-07 DE=-1.38D-10 OVMax= 3.67D-06
Error on total polarization charges = 0.01957
SCF Done: E(RB3LYP) = -1790.44953522 A.U. after 13 cycles
NFock= 13 Conv=0.59D-08 -V/T= 2.0043
KE= 1.782864665002D+03 PE=-1.454279186005D+04 EE= 5.780715551374D+03
Leave Link 502 at Sun May 28 01:50:18 2023, MaxMem= 4294967296 cpu: 6215.3
(Enter /public/apps/gs/g09/l601.exe)
Copying SCF densities to generalized density rwf, IOpCl= 0 IROHF=0.
**********************************************************************
Population analysis using the SCF density.
**********************************************************************
Alpha occ. eigenvalues -- -19.11837 -19.11641 -14.34543 -14.33700 -10.23568
Alpha occ. eigenvalues -- -10.23390 -10.22810 -10.22232 -10.22214 -10.21235
Alpha occ. eigenvalues -- -10.20949 -10.19851 -10.19779 -10.19666 -10.19546
Alpha occ. eigenvalues -- -10.18965 -10.18935 -10.18869 -10.18836 -10.18629
Alpha occ. eigenvalues -- -10.18587 -10.18528 -10.18504 -10.18493 -10.18456
Alpha occ. eigenvalues -- -10.18383 -10.18328 -10.18281 -10.18190 -10.18158
Alpha occ. eigenvalues -- -10.17783 -10.17720 -10.17349 -10.17238 -10.16983
Alpha occ. eigenvalues -- -10.16882 -10.16843 -10.16818 -10.16741 -10.16559
Alpha occ. eigenvalues -- -10.16096 -10.16054 -10.15870 -6.81360 -1.05588
Alpha occ. eigenvalues -- -1.02188 -0.98842 -0.97252 -0.89134 -0.87994
Alpha occ. eigenvalues -- -0.87302 -0.83447 -0.83052 -0.81919 -0.80987
Alpha occ. eigenvalues -- -0.80215 -0.79986 -0.77132 -0.76563 -0.76534
Alpha occ. eigenvalues -- -0.76028 -0.75067 -0.73904 -0.73760 -0.72935
Alpha occ. eigenvalues -- -0.71617 -0.70846 -0.70346 -0.67778 -0.65286
Alpha occ. eigenvalues -- -0.63611 -0.63230 -0.62815 -0.61998 -0.61489
Alpha occ. eigenvalues -- -0.61234 -0.60626 -0.59285 -0.58056 -0.56801
Alpha occ. eigenvalues -- -0.56096 -0.55272 -0.54324 -0.53446 -0.53032
Alpha occ. eigenvalues -- -0.52565 -0.52410 -0.51367 -0.50907 -0.49704
Alpha occ. eigenvalues -- -0.48308 -0.47508 -0.47143 -0.46827 -0.46387
Alpha occ. eigenvalues -- -0.45819 -0.45456 -0.45287 -0.44707 -0.44256
Alpha occ. eigenvalues -- -0.44018 -0.43978 -0.43547 -0.43373 -0.43215
Alpha occ. eigenvalues -- -0.43058 -0.42939 -0.42755 -0.42226 -0.41951
Alpha occ. eigenvalues -- -0.41671 -0.41388 -0.40988 -0.40665 -0.40430
Alpha occ. eigenvalues -- -0.40243 -0.39910 -0.39588 -0.39150 -0.39069
Alpha occ. eigenvalues -- -0.38774 -0.38280 -0.37891 -0.37541 -0.37393
Alpha occ. eigenvalues -- -0.36572 -0.36412 -0.36247 -0.35889 -0.35402
Alpha occ. eigenvalues -- -0.35360 -0.34861 -0.34455 -0.33525 -0.32998
Alpha occ. eigenvalues -- -0.31792 -0.30639 -0.29761 -0.29130 -0.28778
Alpha occ. eigenvalues -- -0.28094 -0.26952 -0.26442 -0.26096 -0.25216
Alpha occ. eigenvalues -- -0.24900 -0.23480 -0.22773 -0.20862 -0.20557
Alpha virt. eigenvalues -- -0.09666 -0.05998 -0.04271 -0.02616 -0.02595
Alpha virt. eigenvalues -- -0.02420 -0.01057 0.00839 0.02057 0.02924
Alpha virt. eigenvalues -- 0.03556 0.03865 0.03971 0.05202 0.05441
Alpha virt. eigenvalues -- 0.06059 0.06137 0.06731 0.06869 0.07193
Alpha virt. eigenvalues -- 0.07611 0.08078 0.08344 0.08471 0.08727
Alpha virt. eigenvalues -- 0.08903 0.09360 0.09827 0.10151 0.10198
Alpha virt. eigenvalues -- 0.10765 0.11308 0.11435 0.11573 0.12077
Alpha virt. eigenvalues -- 0.12561 0.12810 0.13141 0.13708 0.13977
Alpha virt. eigenvalues -- 0.14305 0.14468 0.14812 0.15445 0.15919
Alpha virt. eigenvalues -- 0.16216 0.16439 0.16768 0.17129 0.17933
Alpha virt. eigenvalues -- 0.18416 0.18556 0.19405 0.20066 0.20565
Alpha virt. eigenvalues -- 0.21115 0.21326 0.21909 0.22245 0.22802
Alpha virt. eigenvalues -- 0.23130 0.24081 0.24378 0.24827 0.25299
Alpha virt. eigenvalues -- 0.25605 0.26166 0.26708 0.26850 0.26966
Alpha virt. eigenvalues -- 0.27058 0.27435 0.27670 0.27999 0.28257
Alpha virt. eigenvalues -- 0.28682 0.28721 0.29147 0.29312 0.29449
Alpha virt. eigenvalues -- 0.29770 0.30436 0.30518 0.30864 0.31206
Alpha virt. eigenvalues -- 0.31564 0.31991 0.32236 0.32536 0.32764
Alpha virt. eigenvalues -- 0.33407 0.33930 0.34657 0.34923 0.35069
Alpha virt. eigenvalues -- 0.35912 0.36373 0.36552 0.36907 0.37218
Alpha virt. eigenvalues -- 0.37464 0.37669 0.37951 0.38144 0.38578
Alpha virt. eigenvalues -- 0.38924 0.39192 0.39404 0.39625 0.40125
Alpha virt. eigenvalues -- 0.40283 0.40384 0.40911 0.41049 0.41454
Alpha virt. eigenvalues -- 0.41550 0.41893 0.41932 0.42128 0.42586
Alpha virt. eigenvalues -- 0.42764 0.43055 0.43429 0.43675 0.43987
Alpha virt. eigenvalues -- 0.44196 0.44442 0.44586 0.44736 0.44915
Alpha virt. eigenvalues -- 0.45689 0.45876 0.46165 0.46618 0.46792
Alpha virt. eigenvalues -- 0.46947 0.47208 0.47555 0.47825 0.48271
Alpha virt. eigenvalues -- 0.48484 0.48902 0.49136 0.49576 0.49769
Alpha virt. eigenvalues -- 0.49874 0.50347 0.50772 0.51195 0.51337
Alpha virt. eigenvalues -- 0.52029 0.52232 0.52645 0.52918 0.53362
Alpha virt. eigenvalues -- 0.53769 0.54138 0.54367 0.54696 0.54866
Alpha virt. eigenvalues -- 0.55122 0.55447 0.55973 0.56548 0.56755
Alpha virt. eigenvalues -- 0.57046 0.57273 0.57529 0.58050 0.58788
Alpha virt. eigenvalues -- 0.58823 0.59224 0.59246 0.59466 0.59644
Alpha virt. eigenvalues -- 0.59856 0.60046 0.60520 0.60677 0.61090
Alpha virt. eigenvalues -- 0.61455 0.61563 0.61793 0.62196 0.62529
Alpha virt. eigenvalues -- 0.62800 0.63030 0.63246 0.63681 0.63870
Alpha virt. eigenvalues -- 0.64075 0.64447 0.64655 0.64970 0.65226
Alpha virt. eigenvalues -- 0.65727 0.65952 0.66156 0.66505 0.66763
Alpha virt. eigenvalues -- 0.67159 0.67433 0.68027 0.68945 0.69044
Alpha virt. eigenvalues -- 0.69375 0.69731 0.70156 0.70382 0.70725
Alpha virt. eigenvalues -- 0.70824 0.71526 0.71791 0.72249 0.72435
Alpha virt. eigenvalues -- 0.73051 0.73367 0.73467 0.74161 0.74459
Alpha virt. eigenvalues -- 0.74561 0.74594 0.74917 0.75611 0.76225
Alpha virt. eigenvalues -- 0.76413 0.77204 0.77594 0.78131 0.78888
Alpha virt. eigenvalues -- 0.79249 0.79370 0.79519 0.79911 0.80448
Alpha virt. eigenvalues -- 0.80784 0.80946 0.81203 0.81925 0.82599
Alpha virt. eigenvalues -- 0.83088 0.83379 0.83557 0.83830 0.84779
Alpha virt. eigenvalues -- 0.85370 0.85772 0.86109 0.86373 0.87176
Alpha virt. eigenvalues -- 0.87468 0.87643 0.88043 0.88735 0.89225
Alpha virt. eigenvalues -- 0.89298 0.89833 0.90644 0.91200 0.91920
Alpha virt. eigenvalues -- 0.92126 0.93219 0.93683 0.94030 0.95992
Alpha virt. eigenvalues -- 0.96035 0.96415 0.96975 0.97229 0.97949
Alpha virt. eigenvalues -- 0.98137 0.98671 0.99155 0.99406 0.99786
Alpha virt. eigenvalues -- 1.00050 1.01004 1.01196 1.01372 1.01834
Alpha virt. eigenvalues -- 1.02004 1.02627 1.02929 1.03692 1.03866
Alpha virt. eigenvalues -- 1.03945 1.05038 1.05572 1.06166 1.06758
Alpha virt. eigenvalues -- 1.06882 1.07021 1.07379 1.07651 1.08142
Alpha virt. eigenvalues -- 1.08904 1.09482 1.09580 1.10218 1.10371
Alpha virt. eigenvalues -- 1.11381 1.11808 1.12001 1.12683 1.13050
Alpha virt. eigenvalues -- 1.13226 1.13819 1.14111 1.14858 1.15008
Alpha virt. eigenvalues -- 1.15678 1.16344 1.17552 1.18060 1.18806
Alpha virt. eigenvalues -- 1.19225 1.20315 1.20564 1.21100 1.22360
Alpha virt. eigenvalues -- 1.22871 1.23042 1.24778 1.25010 1.25270
Alpha virt. eigenvalues -- 1.26156 1.27714 1.28363 1.29900 1.30435
Alpha virt. eigenvalues -- 1.31111 1.31438 1.32629 1.33077 1.33287
Alpha virt. eigenvalues -- 1.33362 1.35049 1.35416 1.36588 1.37325
Alpha virt. eigenvalues -- 1.37736 1.38471 1.39105 1.39864 1.40547
Alpha virt. eigenvalues -- 1.40627 1.41518 1.42414 1.42709 1.42784
Alpha virt. eigenvalues -- 1.43286 1.43758 1.44145 1.44579 1.44836
Alpha virt. eigenvalues -- 1.45236 1.45620 1.45920 1.46471 1.46977
Alpha virt. eigenvalues -- 1.47402 1.48173 1.48521 1.48768 1.49028
Alpha virt. eigenvalues -- 1.49353 1.49495 1.50281 1.50429 1.50608
Alpha virt. eigenvalues -- 1.51570 1.51725 1.52483 1.53062 1.53233
Alpha virt. eigenvalues -- 1.53703 1.53772 1.53990 1.54222 1.54423
Alpha virt. eigenvalues -- 1.54961 1.55571 1.56006 1.56159 1.56334
Alpha virt. eigenvalues -- 1.56484 1.56869 1.57213 1.57332 1.57562
Alpha virt. eigenvalues -- 1.58521 1.58855 1.59133 1.59435 1.59621
Alpha virt. eigenvalues -- 1.60024 1.60665 1.60916 1.61086 1.61721
Alpha virt. eigenvalues -- 1.62243 1.62860 1.63355 1.63524 1.64229
Alpha virt. eigenvalues -- 1.64693 1.64910 1.65383 1.65896 1.66046
Alpha virt. eigenvalues -- 1.66770 1.67152 1.67833 1.68393 1.68822
Alpha virt. eigenvalues -- 1.69172 1.69557 1.70305 1.70867 1.71022
Alpha virt. eigenvalues -- 1.71635 1.72272 1.72365 1.72904 1.73097
Alpha virt. eigenvalues -- 1.73215 1.73954 1.74161 1.74544 1.74830
Alpha virt. eigenvalues -- 1.75237 1.75892 1.76464 1.76645 1.76725
Alpha virt. eigenvalues -- 1.77203 1.77493 1.77518 1.78031 1.78480
Alpha virt. eigenvalues -- 1.78956 1.79006 1.79825 1.80570 1.81670
Alpha virt. eigenvalues -- 1.81787 1.82513 1.82574 1.83689 1.84238
Alpha virt. eigenvalues -- 1.84894 1.85999 1.86330 1.86686 1.87246
Alpha virt. eigenvalues -- 1.87396 1.87663 1.88068 1.88927 1.89081
Alpha virt. eigenvalues -- 1.89470 1.89941 1.90074 1.90641 1.91259
Alpha virt. eigenvalues -- 1.91599 1.91898 1.92179 1.92758 1.93047
Alpha virt. eigenvalues -- 1.93346 1.93701 1.94111 1.94726 1.95254
Alpha virt. eigenvalues -- 1.95823 1.95932 1.96187 1.96549 1.96815
Alpha virt. eigenvalues -- 1.97565 1.97916 1.98285 1.99159 1.99947
Alpha virt. eigenvalues -- 2.00230 2.00252 2.00709 2.01053 2.01784
Alpha virt. eigenvalues -- 2.02332 2.03073 2.03481 2.04243 2.04374
Alpha virt. eigenvalues -- 2.04813 2.05413 2.05703 2.06354 2.06606
Alpha virt. eigenvalues -- 2.07465 2.07752 2.08149 2.08717 2.09127
Alpha virt. eigenvalues -- 2.10137 2.10922 2.11324 2.11899 2.12457
Alpha virt. eigenvalues -- 2.13361 2.14145 2.14652 2.15204 2.15511
Alpha virt. eigenvalues -- 2.16282 2.17185 2.18398 2.18800 2.19556
Alpha virt. eigenvalues -- 2.20124 2.21831 2.22113 2.23355 2.24064
Alpha virt. eigenvalues -- 2.24756 2.24969 2.26253 2.27176 2.27901
Alpha virt. eigenvalues -- 2.29822 2.30305 2.30563 2.31795 2.32386
Alpha virt. eigenvalues -- 2.33376 2.33639 2.33827 2.34325 2.34546
Alpha virt. eigenvalues -- 2.35529 2.36071 2.36314 2.36990 2.37171
Alpha virt. eigenvalues -- 2.37761 2.37833 2.38140 2.38484 2.39784
Alpha virt. eigenvalues -- 2.40257 2.40698 2.41093 2.41620 2.41992
Alpha virt. eigenvalues -- 2.42438 2.43602 2.43723 2.44447 2.45536
Alpha virt. eigenvalues -- 2.46193 2.46922 2.47172 2.47401 2.48651
Alpha virt. eigenvalues -- 2.48996 2.50505 2.50907 2.51173 2.52110
Alpha virt. eigenvalues -- 2.52687 2.53429 2.54263 2.54582 2.55912
Alpha virt. eigenvalues -- 2.56073 2.56569 2.56882 2.57108 2.57955
Alpha virt. eigenvalues -- 2.58440 2.59053 2.59568 2.59831 2.60396
Alpha virt. eigenvalues -- 2.60627 2.61231 2.61623 2.61818 2.62079
Alpha virt. eigenvalues -- 2.62829 2.63003 2.63499 2.63923 2.64164
Alpha virt. eigenvalues -- 2.64462 2.64627 2.65094 2.65349 2.65639
Alpha virt. eigenvalues -- 2.66499 2.66799 2.67160 2.67358 2.67625
Alpha virt. eigenvalues -- 2.68288 2.68812 2.69128 2.69639 2.70020
Alpha virt. eigenvalues -- 2.70668 2.71198 2.71331 2.71489 2.71893
Alpha virt. eigenvalues -- 2.72508 2.72886 2.73448 2.73784 2.74172
Alpha virt. eigenvalues -- 2.74980 2.75345 2.75561 2.75999 2.76776
Alpha virt. eigenvalues -- 2.77220 2.77490 2.77977 2.78750 2.79053
Alpha virt. eigenvalues -- 2.79296 2.79916 2.81443 2.82049 2.82554
Alpha virt. eigenvalues -- 2.82936 2.83759 2.83786 2.84418 2.84970
Alpha virt. eigenvalues -- 2.86130 2.86885 2.87827 2.88751 2.89425
Alpha virt. eigenvalues -- 2.89817 2.90401 2.90800 2.91256 2.91563
Alpha virt. eigenvalues -- 2.91707 2.92685 2.93426 2.93801 2.94301
Alpha virt. eigenvalues -- 2.95697 2.96700 2.98322 2.99475 3.00542
Alpha virt. eigenvalues -- 3.01225 3.01757 3.01931 3.03052 3.03583
Alpha virt. eigenvalues -- 3.04800 3.05607 3.06048 3.07214 3.08395
Alpha virt. eigenvalues -- 3.09381 3.10028 3.10819 3.11797 3.13009
Alpha virt. eigenvalues -- 3.13837 3.14475 3.15484 3.17037 3.18116
Alpha virt. eigenvalues -- 3.19318 3.20180 3.21223 3.22294 3.22587
Alpha virt. eigenvalues -- 3.24308 3.25041 3.27343 3.27892 3.28966
Alpha virt. eigenvalues -- 3.31066 3.31646 3.32794 3.34295 3.34787
Alpha virt. eigenvalues -- 3.35578 3.36016 3.36357 3.37940 3.39049
Alpha virt. eigenvalues -- 3.39279 3.39945 3.41246 3.41802 3.42068
Alpha virt. eigenvalues -- 3.42667 3.43250 3.43869 3.45470 3.45858
Alpha virt. eigenvalues -- 3.48281 3.49438 3.49861 3.50453 3.50828
Alpha virt. eigenvalues -- 3.52417 3.54389 3.55800 3.56470 3.58183
Alpha virt. eigenvalues -- 3.60292 3.63174 3.63482 3.64494 3.67170
Alpha virt. eigenvalues -- 3.68640 3.71399 3.74102 3.77704 3.77993
Alpha virt. eigenvalues -- 3.79643 3.79723 3.80805 3.82129 3.84424
Alpha virt. eigenvalues -- 3.85270 3.85795 3.86720 3.87874 3.92528
Alpha virt. eigenvalues -- 3.93925 3.95636 3.95756 3.96465 3.96870
Alpha virt. eigenvalues -- 3.98861 4.01591 4.01794 4.02527 4.03284
Alpha virt. eigenvalues -- 4.04467 4.05699 4.08959 4.09767 4.11147
Alpha virt. eigenvalues -- 4.14632 4.17270 4.18665 4.19550 4.26571
Alpha virt. eigenvalues -- 4.28633 4.30952 4.32509 4.34699 4.38480
Alpha virt. eigenvalues -- 4.39452 4.45429 4.53514 4.60946 4.63086
Alpha virt. eigenvalues -- 4.80787 4.81594 4.82677 4.82768 4.84179
Alpha virt. eigenvalues -- 4.87932 5.12300 5.14032 5.16695 5.19313
Alpha virt. eigenvalues -- 5.22914 5.33166 5.75042 5.77985 14.62927
Alpha virt. eigenvalues -- 23.43624 23.55340 23.57088 23.64397 23.72083
Alpha virt. eigenvalues -- 23.75225 23.78277 23.80842 23.86504 23.87937
Alpha virt. eigenvalues -- 23.89178 23.91324 23.91630 23.92348 23.92741
Alpha virt. eigenvalues -- 23.93981 23.94067 23.94872 23.94963 23.96151
Alpha virt. eigenvalues -- 23.97109 23.98500 23.99591 24.01464 24.01922
Alpha virt. eigenvalues -- 24.03300 24.03549 24.09236 24.10752 24.11712
Alpha virt. eigenvalues -- 24.12865 24.13223 24.14591 24.15453 24.17905
Alpha virt. eigenvalues -- 24.18639 24.19865 24.20431 24.20684 35.58226
Alpha virt. eigenvalues -- 35.59277 49.98813 50.01417
Condensed to atoms (all electrons):
Mulliken charges:
1
1 C 0.163460
2 C 0.024724
3 C -0.068543
4 C 0.139843
5 C -0.118249
6 C -0.047913
7 C -0.048770
8 C -0.108690
9 C -0.104514
10 C -0.055611
11 C -0.072816
12 C -0.075137
13 C -0.066740
14 C -0.109305
15 B 0.583708
16 O -0.436549
17 O -0.412955
18 C -0.087019
19 C -0.065805
20 C -0.114415
21 C -0.113560
22 C -0.108994
23 C -0.077524
24 H 0.116838
25 H 0.112124
26 H 0.091710
27 H 0.089666
28 H 0.111669
29 H 0.115085
30 H 0.104402
31 H 0.127547
32 H 0.107931
33 H 0.098006
34 H 0.106201
35 H 0.109053
36 C -0.040106
37 C -0.095093
38 C 0.002572
39 N -0.447628
40 C -0.232397
41 N -0.436256
42 C -0.273707
43 C -0.231283
44 C -0.094902
45 C -0.102331
46 C -0.038048
47 C -0.247812
48 C -0.274663
49 C 0.249760
50 C 0.225036
51 C -0.129358
52 C -0.177703
53 C 0.152682
54 C 0.157331
55 C -0.146553
56 C -0.125434
57 H 0.113566
58 H 0.120119
59 H 0.137348
60 H 0.130058
61 H 0.107179
62 H 0.117163
63 H 0.151064
64 H 0.150166
65 H 0.132045
66 H 0.133924
67 H 0.139685
68 H 0.115879
69 H 0.112532
70 H 0.104998
71 H 0.153821
72 H 0.140272
73 H 0.139878
74 H 0.083664
75 H 0.113671
Sum of Mulliken charges = -0.00000
Mulliken charges with hydrogens summed into heavy atoms:
1
1 C 0.163460
2 C 0.024724
3 C -0.068543
4 C 0.139843
5 C -0.001411
6 C 0.064211
7 C -0.048770
8 C -0.108690
9 C -0.104514
10 C -0.055611
11 C 0.018894
12 C 0.014529
13 C 0.044929
14 C 0.005781
15 B 0.583708
16 O -0.436549
17 O -0.412955
18 C 0.017384
19 C 0.061741
20 C -0.006483
21 C -0.015553
22 C -0.002793
23 C 0.031529
36 C 0.073460
37 C 0.025026
38 C 0.002572
39 N -0.447628
40 C 0.142188
41 N -0.436256
42 C 0.144686
43 C 0.174371
44 C 0.020977
45 C 0.010201
46 C 0.066950
47 C -0.247812
48 C 0.159308
49 C 0.249760
50 C 0.225036
51 C -0.129358
52 C -0.094038
53 C 0.152682
54 C 0.157331
55 C -0.032882
56 C -0.125434
Electronic spatial extent (au): <R**2>= 23402.9313
Charge= -0.0000 electrons
Dipole moment (field-independent basis, Debye):
X= 5.9579 Y= 3.4637 Z= -0.3115 Tot= 6.8986
Quadrupole moment (field-independent basis, Debye-Ang):
XX= -209.6462 YY= -228.9754 ZZ= -251.0804
XY= -3.5292 XZ= 5.8919 YZ= -4.2127
Traceless Quadrupole moment (field-independent basis, Debye-Ang):
XX= 20.2545 YY= 0.9253 ZZ= -21.1797
XY= -3.5292 XZ= 5.8919 YZ= -4.2127
Octapole moment (field-independent basis, Debye-Ang**2):
XXX= 228.8915 YYY= 70.9531 ZZZ= -3.6196 XYY= -20.7917
XXY= 65.2558 XXZ= -0.7812 XZZ= 28.5918 YZZ= 3.5166
YYZ= -0.5192 XYZ= 9.3111
Hexadecapole moment (field-independent basis, Debye-Ang**3):
XXXX= -20539.2292 YYYY= -7093.8969 ZZZZ= -2059.4662 XXXY= -256.4629
XXXZ= 20.5154 YYYX= 37.5479 YYYZ= -53.5353 ZZZX= 50.1373
ZZZY= -47.2200 XXYY= -4817.5980 XXZZ= -4062.6545 YYZZ= -1519.3916
XXYZ= -76.9416 YYXZ= 109.1657 ZZXY= -61.8236
N-N= 5.188762108453D+03 E-N=-1.454279186151D+04 KE= 1.782864665002D+03
No NMR shielding tensors so no spin-rotation constants.
Leave Link 601 at Sun May 28 01:50:19 2023, MaxMem= 4294967296 cpu: 18.5
(Enter /public/apps/gs/g09/l701.exe)
Compute integral first derivatives.
... and contract with generalized density number 0.
R6Disp: Adding Grimme-D3(BJ) dispersion energy 1st derivatives to the gradient.
D1PCM: PCM CHGder 1st derivatives, ID1Alg=3 FixD1E=F DoIter=F DoCFld=F I1PDM=0.
GePol: Maximum number of non-zero 1st derivatives = 199
Leave Link 701 at Sun May 28 01:50:24 2023, MaxMem= 4294967296 cpu: 170.0
(Enter /public/apps/gs/g09/l702.exe)
L702 exits ... SP integral derivatives will be done elsewhere.
Leave Link 702 at Sun May 28 01:50:24 2023, MaxMem= 4294967296 cpu: 0.5
(Enter /public/apps/gs/g09/l703.exe)
Compute integral first derivatives, UseDBF=F ICtDFT= 0.
Integral derivatives from FoFJK, PRISM(SPDF).
Calling FoFJK, ICntrl= 2127 FMM=T ISym2X=0 I1Cent= 0 IOpClX= 0 NMat=1 NMatS=1 NMatT=0.
FoFJK: IHMeth= 1 ICntrl= 2127 DoSepK=F KAlg= 0 I1Cent= 0 FoldK=F
IRaf= 0 NMat= 1 IRICut= 1 DoRegI=T DoRafI=F ISym2E= 0.
FoFCou: FMM=T IPFlag= 0 FMFlag= 100000 FMFlg1= 2001
NFxFlg= 0 DoJE=F BraDBF=F KetDBF=F FulRan=T
wScrn= 0.000000 ICntrl= 2127 IOpCl= 0 I1Cent= 0 NGrid= 0
NMat0= 1 NMatS0= 1 NMatT0= 0 NMatD0= 1 NMtDS0= 0 NMtDT0= 0
Symmetry not used in FoFCou.
FMM levels: 10 Number of levels for PrismC: 9
Leave Link 703 at Sun May 28 01:51:02 2023, MaxMem= 4294967296 cpu: 1198.2
(Enter /public/apps/gs/g09/l716.exe)
Dipole = 2.34400976D+00 1.36274381D+00-1.22568714D-01
-------------------------------------------------------------------
Center Atomic Forces (Hartrees/Bohr)
Number Number X Y Z
-------------------------------------------------------------------
1 6 -0.000767582 0.000521145 -0.000022075
2 6 0.000113379 0.000185769 -0.000220094
3 6 -0.000750994 0.000517578 -0.000657638
4 6 0.001575213 0.001617892 -0.000035291
5 6 0.000061871 -0.000175021 -0.000242706
6 6 0.000084465 -0.000082558 -0.000264702
7 6 -0.000021981 -0.000423441 0.000378138
8 6 -0.000680673 -0.000158625 0.000407509
9 6 0.000712833 0.000142575 0.000443806
10 6 0.000205899 -0.000394882 0.000249180
11 6 -0.000005557 -0.000015691 -0.000147206
12 6 -0.000044273 0.000254707 -0.000228503
13 6 0.000005588 0.000117633 -0.000342485
14 6 -0.000264378 -0.000272819 0.000138112
15 5 0.000148815 0.003182447 -0.001072050
16 8 0.000990814 -0.001592775 0.000450447
17 8 -0.001420948 -0.002758456 0.000736083
18 6 -0.000162275 -0.000315061 -0.000077963
19 6 -0.000179981 -0.000136176 -0.000283764
20 6 -0.000152375 0.000058736 -0.000262137
21 6 0.000206223 -0.000008507 -0.000022479
22 6 -0.000144481 0.000144585 -0.000386933
23 6 0.000174288 -0.000110824 -0.000435192
24 1 -0.000064841 0.000204013 0.000178955
25 1 0.000182553 -0.000034397 0.000223624
26 1 0.000010757 -0.000172995 0.000219876
27 1 0.000123062 -0.000191741 0.000296097
28 1 0.000106067 -0.000064704 0.000285995
29 1 0.000266097 0.000118958 0.000000639
30 1 0.000014672 0.000217121 0.000091786
31 1 0.000113248 0.000087228 0.000214279
32 1 -0.000056789 0.000196182 0.000019359
33 1 -0.000307441 -0.000167005 0.000024991
34 1 -0.000022627 0.000200625 0.000130202
35 1 0.000049620 0.000049503 0.000286153
36 6 -0.000054567 -0.000277438 -0.000149491
37 6 0.000101577 -0.000279637 -0.000131503
38 6 0.000456111 0.007703467 0.002712973
39 7 0.002063111 -0.001483901 0.000198291
40 6 0.000384386 0.000407960 0.000095113
41 7 -0.001940629 -0.001037928 -0.000578091
42 6 -0.000485794 -0.000103348 0.000453379
43 6 -0.000300125 0.000354562 0.000100509
44 6 -0.000050028 -0.000268950 -0.000078299
45 6 -0.000104287 -0.000274563 -0.000183049
46 6 0.000110377 -0.000300416 -0.000154320
47 6 -0.000057572 -0.000067172 -0.000017593
48 6 0.000519794 0.000067156 0.000545125
49 6 0.001374016 -0.005934600 -0.001566894
50 6 -0.002280470 -0.005096826 -0.002278057
51 6 0.000373458 0.003678390 0.001765555
52 6 -0.002968175 0.000341241 -0.000323520
53 6 0.000957712 -0.001303375 -0.000653528
54 6 -0.001663903 -0.001177001 -0.000681299
55 6 0.003395525 -0.000350676 0.000425963
56 6 -0.000084433 0.004172496 0.001458405
57 1 0.000064703 0.000250751 0.000161520
58 1 -0.000048619 0.000292337 0.000125447
59 1 0.000137768 -0.000090111 0.000098729
60 1 0.000253587 0.000067085 0.000039498
61 1 -0.000046316 -0.000431596 -0.000262099
62 1 -0.000003235 -0.000009849 -0.000381737
63 1 -0.000337213 0.000172745 -0.000000023
64 1 -0.000031212 0.000068766 -0.000086006
65 1 -0.000003533 -0.000347017 -0.000261688
66 1 -0.000133576 -0.000048257 0.000120640
67 1 -0.000210389 0.000159610 -0.000100356
68 1 0.000072145 0.000296706 0.000053829
69 1 0.000071527 0.000252663 0.000203137
70 1 -0.000068896 0.000288754 0.000108828
71 1 0.000415723 0.000129304 -0.000021820
72 1 0.000099845 -0.000038907 -0.000003958
73 1 -0.000038147 -0.000166034 -0.000348401
74 1 -0.000031304 -0.000197933 -0.000262293
75 1 -0.000007208 -0.000159475 -0.000216929
-------------------------------------------------------------------
Cartesian Forces: Max 0.007703467 RMS 0.001075806
Leave Link 716 at Sun May 28 01:51:02 2023, MaxMem= 4294967296 cpu: 4.2
(Enter /public/apps/gs/g09/l103.exe)
GradGradGradGradGradGradGradGradGradGradGradGradGradGradGradGradGradGrad
Berny optimization.
FormGI is forming the generalized inverse of G from B-inverse, IUseBI=4.
Internal Forces: Max 0.004506579 RMS 0.000488957
Search for a local minimum.
Step number 1 out of a maximum of 450
All quantities printed in internal units (Hartrees-Bohrs-Radians)
RMS Force = .48896D-03 SwitMx=.10000D-02 MixMth= 2
Mixed Optimization -- En-DIIS/RFO-DIIS
Second derivative matrix not updated -- first step.
ITU= 0
Eigenvalues --- 0.00569 0.00803 0.00805 0.00887 0.00914
Eigenvalues --- 0.00923 0.01071 0.01243 0.01419 0.01427
Eigenvalues --- 0.01514 0.01515 0.01548 0.01598 0.01636
Eigenvalues --- 0.01714 0.01715 0.01741 0.01747 0.01752
Eigenvalues --- 0.01767 0.01784 0.01793 0.01802 0.01955
Eigenvalues --- 0.01971 0.01991 0.01995 0.02019 0.02033
Eigenvalues --- 0.02035 0.02042 0.02050 0.02065 0.02096
Eigenvalues --- 0.02110 0.02110 0.02116 0.02133 0.02133
Eigenvalues --- 0.02137 0.02142 0.02150 0.02164 0.02168
Eigenvalues --- 0.02169 0.02169 0.02170 0.02171 0.02175
Eigenvalues --- 0.02176 0.02180 0.02180 0.02182 0.02210
Eigenvalues --- 0.02213 0.02247 0.02272 0.02290 0.02296
Eigenvalues --- 0.02361 0.04398 0.06730 0.07149 0.07155
Eigenvalues --- 0.07208 0.07287 0.07331 0.07332 0.07463
Eigenvalues --- 0.07555 0.08075 0.11944 0.13041 0.15988
Eigenvalues --- 0.15989 0.15996 0.15997 0.15998 0.15998
Eigenvalues --- 0.15998 0.15999 0.15999 0.15999 0.15999
Eigenvalues --- 0.16000 0.16000 0.16000 0.16000 0.16000
Eigenvalues --- 0.16000 0.16000 0.16000 0.16000 0.16000
Eigenvalues --- 0.16000 0.16000 0.16000 0.16000 0.16000
Eigenvalues --- 0.16000 0.16000 0.16000 0.16000 0.16000
Eigenvalues --- 0.20500 0.21643 0.21998 0.21999 0.22000
Eigenvalues --- 0.22000 0.22378 0.22413 0.22674 0.22731
Eigenvalues --- 0.23483 0.23715 0.23740 0.23769 0.24008
Eigenvalues --- 0.24319 0.24338 0.24626 0.24652 0.24694
Eigenvalues --- 0.24804 0.24875 0.24878 0.24918 0.24930
Eigenvalues --- 0.24982 0.24988 0.24999 0.24999 0.25000
Eigenvalues --- 0.25000 0.26052 0.26488 0.32103 0.32676
Eigenvalues --- 0.32692 0.33355 0.33577 0.33652 0.34294
Eigenvalues --- 0.34566 0.34572 0.34581 0.34585 0.34639
Eigenvalues --- 0.34639 0.34676 0.34696 0.34700 0.34779
Eigenvalues --- 0.34800 0.35277 0.35431 0.35441 0.35486
Eigenvalues --- 0.35491 0.35518 0.35521 0.35524 0.35566
Eigenvalues --- 0.35567 0.35568 0.35571 0.35574 0.35574
Eigenvalues --- 0.35576 0.35595 0.35623 0.35826 0.35927
Eigenvalues --- 0.36027 0.36035 0.36537 0.36613 0.36637
Eigenvalues --- 0.38334 0.38493 0.38693 0.39232 0.40075
Eigenvalues --- 0.40141 0.40508 0.40870 0.41037 0.41880
Eigenvalues --- 0.41959 0.42256 0.42336 0.42351 0.42719
Eigenvalues --- 0.43007 0.43096 0.43402 0.43821 0.43941
Eigenvalues --- 0.44116 0.45370 0.45603 0.46092 0.46243
Eigenvalues --- 0.46426 0.46506 0.46711 0.46901 0.48273
Eigenvalues --- 0.48384 0.49543 0.49680 0.49914 0.50287
Eigenvalues --- 0.51285 0.51960 0.52463 0.52654
RFO step: Lambda=-4.13244327D-04 EMin= 5.69333669D-03
Linear search not attempted -- first point.
Iteration 1 RMS(Cart)= 0.03277003 RMS(Int)= 0.00011228
Iteration 2 RMS(Cart)= 0.00033328 RMS(Int)= 0.00001042
Iteration 3 RMS(Cart)= 0.00000001 RMS(Int)= 0.00001042
ITry= 1 IFail=0 DXMaxC= 1.23D-01 DCOld= 1.00D+10 DXMaxT= 3.00D-01 DXLimC= 3.00D+00 Rises=F
Variable Old X -DE/DX Delta X Delta X Delta X New X
(Linear) (Quad) (Total)
R1 2.62884 0.00006 0.00000 -0.00016 -0.00015 2.62869
R2 2.68134 -0.00026 0.00000 -0.00071 -0.00071 2.68064
R3 2.55832 0.00084 0.00000 0.00139 0.00139 2.55972
R4 2.80490 -0.00020 0.00000 -0.00067 -0.00065 2.80425
R5 2.71675 0.00041 0.00000 0.00104 0.00104 2.71779
R6 2.61730 0.00040 0.00000 0.00103 0.00103 2.61833
R7 2.71328 -0.00038 0.00000 -0.00096 -0.00096 2.71232
R8 2.56967 -0.00185 0.00000 -0.00332 -0.00332 2.56635
R9 2.67233 0.00032 0.00000 0.00083 0.00083 2.67316
R10 2.58248 -0.00034 0.00000 -0.00067 -0.00067 2.58181
R11 2.04720 -0.00009 0.00000 -0.00026 -0.00026 2.04694
R12 2.68089 0.00015 0.00000 0.00041 0.00041 2.68130
R13 2.04893 -0.00020 0.00000 -0.00057 -0.00057 2.04836
R14 2.70318 -0.00021 0.00000 -0.00041 -0.00041 2.70277
R15 2.67913 -0.00017 0.00000 -0.00042 -0.00042 2.67871
R16 2.68535 -0.00011 0.00000 -0.00023 -0.00023 2.68512
R17 2.70707 0.00022 0.00000 0.00042 0.00042 2.70749
R18 2.68607 0.00009 0.00000 0.00017 0.00017 2.68625
R19 2.68107 -0.00000 0.00000 -0.00009 -0.00008 2.68099
R20 2.68127 0.00014 0.00000 0.00034 0.00034 2.68161
R21 2.58663 0.00022 0.00000 0.00044 0.00044 2.58708
R22 2.04885 0.00025 0.00000 0.00071 0.00071 2.04956
R23 2.59457 0.00042 0.00000 0.00087 0.00087 2.59544
R24 2.04964 0.00033 0.00000 0.00093 0.00093 2.05057
R25 2.59639 -0.00017 0.00000 -0.00037 -0.00037 2.59602
R26 2.04980 -0.00024 0.00000 -0.00067 -0.00067 2.04914
R27 2.66922 -0.00028 0.00000 -0.00064 -0.00064 2.66858
R28 2.04766 -0.00017 0.00000 -0.00048 -0.00048 2.04718
R29 2.76520 -0.00081 0.00000 -0.00227 -0.00228 2.76292
R30 2.76623 0.00096 0.00000 0.00288 0.00286 2.76909
R31 2.96085 0.00046 0.00000 0.00173 0.00173 2.96258
R32 2.95004 -0.00056 0.00000 -0.00241 -0.00241 2.94763
R33 2.04675 0.00004 0.00000 0.00011 0.00011 2.04686
R34 2.59741 -0.00011 0.00000 -0.00023 -0.00023 2.59718
R35 2.04196 -0.00006 0.00000 -0.00017 -0.00017 2.04179
R36 2.67019 0.00029 0.00000 0.00070 0.00070 2.67089
R37 2.04833 0.00005 0.00000 0.00013 0.00013 2.04846
R38 2.04764 0.00032 0.00000 0.00089 0.00089 2.04853
R39 2.59852 0.00031 0.00000 0.00063 0.00063 2.59915
R40 2.04841 0.00005 0.00000 0.00015 0.00015 2.04856
R41 2.04354 0.00014 0.00000 0.00039 0.00039 2.04393
R42 2.63118 0.00001 0.00000 0.00002 0.00002 2.63120
R43 2.63716 0.00001 0.00000 0.00001 0.00001 2.63716
R44 2.04763 -0.00007 0.00000 -0.00019 -0.00019 2.04744
R45 2.63399 -0.00002 0.00000 -0.00004 -0.00004 2.63395
R46 2.04753 -0.00005 0.00000 -0.00015 -0.00015 2.04738
R47 2.81350 0.00005 0.00000 0.00014 0.00014 2.81363
R48 2.63845 -0.00445 0.00000 -0.00959 -0.00959 2.62886
R49 2.63654 0.00451 0.00000 0.00990 0.00990 2.64643
R50 2.66052 -0.00107 0.00000 -0.00255 -0.00255 2.65797
R51 2.56210 0.00018 0.00000 0.00019 0.00019 2.56228
R52 2.82896 0.00067 0.00000 0.00205 0.00205 2.83102
R53 2.06360 -0.00001 0.00000 -0.00004 -0.00004 2.06356
R54 2.06266 0.00012 0.00000 0.00035 0.00035 2.06301
R55 2.06166 0.00051 0.00000 0.00146 0.00146 2.06312
R56 2.65498 0.00089 0.00000 0.00197 0.00197 2.65694
R57 2.55637 -0.00004 0.00000 -0.00004 -0.00004 2.55633
R58 2.81733 0.00079 0.00000 0.00238 0.00238 2.81971
R59 2.06205 0.00029 0.00000 0.00085 0.00085 2.06290
R60 2.06385 0.00011 0.00000 0.00033 0.00033 2.06418
R61 2.05228 0.00010 0.00000 0.00029 0.00029 2.05257
R62 2.82923 -0.00061 0.00000 -0.00187 -0.00187 2.82736
R63 2.06171 -0.00043 0.00000 -0.00123 -0.00123 2.06048
R64 2.06265 0.00007 0.00000 0.00019 0.00019 2.06284
R65 2.06376 -0.00004 0.00000 -0.00012 -0.00012 2.06365
R66 2.63405 0.00006 0.00000 0.00013 0.00013 2.63418
R67 2.04753 0.00004 0.00000 0.00011 0.00011 2.04764
R68 2.63140 0.00003 0.00000 0.00007 0.00007 2.63147
R69 2.04758 0.00011 0.00000 0.00030 0.00030 2.04788
R70 2.63776 -0.00000 0.00000 -0.00000 -0.00000 2.63775
R71 2.04750 0.00005 0.00000 0.00015 0.00015 2.04766
R72 2.81221 -0.00093 0.00000 -0.00276 -0.00276 2.80945
R73 2.06354 -0.00010 0.00000 -0.00028 -0.00028 2.06326
R74 2.06035 -0.00004 0.00000 -0.00013 -0.00013 2.06022
R75 2.06002 -0.00033 0.00000 -0.00096 -0.00096 2.05906
R76 2.70041 0.00295 0.00000 0.00723 0.00723 2.70764
R77 2.70147 -0.00261 0.00000 -0.00638 -0.00638 2.69509
R78 2.62087 0.00264 0.00000 0.00581 0.00581 2.62668
R79 2.66267 -0.00166 0.00000 -0.00353 -0.00353 2.65914
R80 2.04040 0.00030 0.00000 0.00082 0.00082 2.04122
R81 2.65899 0.00189 0.00000 0.00411 0.00411 2.66309
R82 2.62538 -0.00275 0.00000 -0.00591 -0.00591 2.61947
R83 2.04027 -0.00023 0.00000 -0.00063 -0.00063 2.03964
A1 2.10417 0.00005 0.00000 0.00044 0.00044 2.10460
A2 2.16084 0.00018 0.00000 -0.00003 -0.00007 2.16077
A3 2.01734 -0.00022 0.00000 -0.00008 -0.00007 2.01726
A4 2.11055 -0.00035 0.00000 -0.00223 -0.00224 2.10831
A5 2.06213 0.00023 0.00000 0.00121 0.00121 2.06335
A6 2.11048 0.00012 0.00000 0.00103 0.00104 2.11152
A7 2.09163 0.00025 0.00000 0.00155 0.00154 2.09317
A8 2.12369 0.00008 0.00000 -0.00014 -0.00013 2.12355
A9 2.06562 -0.00033 0.00000 -0.00138 -0.00138 2.06424
A10 2.10265 -0.00005 0.00000 0.00073 0.00069 2.10334
A11 2.12455 -0.00009 0.00000 -0.00049 -0.00049 2.12406
A12 2.05595 0.00014 0.00000 -0.00017 -0.00016 2.05579
A13 2.11390 -0.00016 0.00000 -0.00110 -0.00111 2.11279
A14 2.04868 0.00022 0.00000 0.00135 0.00134 2.05001
A15 2.12052 -0.00006 0.00000 -0.00037 -0.00039 2.12013
A16 2.10039 0.00019 0.00000 0.00074 0.00075 2.10114
A17 2.10257 -0.00015 0.00000 -0.00086 -0.00088 2.10169
A18 2.07957 -0.00004 0.00000 -0.00016 -0.00018 2.07939
A19 2.07444 0.00020 0.00000 0.00093 0.00093 2.07537
A20 2.11994 -0.00041 0.00000 -0.00176 -0.00178 2.11817
A21 2.08872 0.00020 0.00000 0.00075 0.00074 2.08946
A22 2.09507 -0.00050 0.00000 -0.00208 -0.00208 2.09299
A23 2.13400 0.00060 0.00000 0.00220 0.00218 2.13618
A24 2.05360 -0.00010 0.00000 -0.00039 -0.00039 2.05321
A25 2.08507 0.00055 0.00000 0.00228 0.00227 2.08735
A26 2.14349 -0.00066 0.00000 -0.00245 -0.00246 2.14104
A27 2.05320 0.00012 0.00000 0.00036 0.00036 2.05356
A28 2.08270 -0.00016 0.00000 -0.00077 -0.00077 2.08193
A29 2.08716 -0.00022 0.00000 -0.00084 -0.00085 2.08631
A30 2.11293 0.00038 0.00000 0.00172 0.00171 2.11464
A31 2.10163 -0.00020 0.00000 -0.00088 -0.00088 2.10075
A32 2.07681 0.00010 0.00000 0.00052 0.00051 2.07732
A33 2.10417 0.00010 0.00000 0.00054 0.00054 2.10470
A34 2.11252 0.00007 0.00000 0.00039 0.00039 2.11291
A35 2.06634 -0.00015 0.00000 -0.00086 -0.00087 2.06548
A36 2.10420 0.00008 0.00000 0.00054 0.00053 2.10473
A37 2.11213 -0.00002 0.00000 -0.00013 -0.00013 2.11199
A38 2.06705 0.00006 0.00000 0.00034 0.00033 2.06738
A39 2.10392 -0.00004 0.00000 -0.00031 -0.00032 2.10360
A40 2.08694 -0.00007 0.00000 -0.00037 -0.00037 2.08657
A41 2.10205 -0.00009 0.00000 -0.00068 -0.00069 2.10136
A42 2.09409 0.00017 0.00000 0.00094 0.00093 2.09502
A43 1.98595 -0.00004 0.00000 0.00054 0.00048 1.98643
A44 1.85238 -0.00014 0.00000 -0.00109 -0.00109 1.85130
A45 1.97522 0.00017 0.00000 0.00200 0.00202 1.97725
A46 1.96778 -0.00031 0.00000 -0.00328 -0.00326 1.96453
A47 1.81431 0.00034 0.00000 0.00266 0.00266 1.81698
A48 1.86748 -0.00002 0.00000 -0.00092 -0.00093 1.86655
A49 2.18230 -0.00009 0.00000 -0.00088 -0.00096 2.18134
A50 2.04231 0.00050 0.00000 0.00449 0.00443 2.04674
A51 2.10027 0.00022 0.00000 0.00132 0.00132 2.10159
A52 2.05883 -0.00029 0.00000 -0.00177 -0.00178 2.05705
A53 2.12408 0.00007 0.00000 0.00047 0.00046 2.12454
A54 2.11732 0.00019 0.00000 0.00070 0.00070 2.11801
A55 2.07975 -0.00031 0.00000 -0.00164 -0.00165 2.07810
A56 2.08606 0.00012 0.00000 0.00101 0.00100 2.08706
A57 2.10711 -0.00018 0.00000 -0.00083 -0.00083 2.10628
A58 2.08805 -0.00009 0.00000 -0.00068 -0.00069 2.08736
A59 2.08801 0.00027 0.00000 0.00154 0.00153 2.08954
A60 2.08732 0.00002 0.00000 0.00019 0.00019 2.08751
A61 2.10203 0.00009 0.00000 0.00057 0.00056 2.10259
A62 2.09366 -0.00011 0.00000 -0.00068 -0.00068 2.09298
A63 2.10664 0.00012 0.00000 0.00062 0.00062 2.10726
A64 2.08834 -0.00020 0.00000 -0.00119 -0.00120 2.08713
A65 2.08820 0.00008 0.00000 0.00052 0.00051 2.08870
A66 2.11737 -0.00013 0.00000 -0.00044 -0.00044 2.11693
A67 2.07853 0.00018 0.00000 0.00091 0.00089 2.07942
A68 2.08722 -0.00006 0.00000 -0.00059 -0.00061 2.08661
A69 2.09630 0.00004 0.00000 0.00016 0.00016 2.09646
A70 2.10053 -0.00004 0.00000 -0.00022 -0.00024 2.10029
A71 2.08635 0.00000 0.00000 0.00008 0.00006 2.08641
A72 2.09618 0.00000 0.00000 -0.00001 -0.00001 2.09617
A73 2.09011 -0.00005 0.00000 -0.00030 -0.00033 2.08979
A74 2.09690 0.00005 0.00000 0.00030 0.00027 2.09717
A75 2.08184 0.00014 0.00000 0.00063 0.00062 2.08247
A76 2.08152 -0.00017 0.00000 -0.00064 -0.00065 2.08087
A77 2.11979 0.00003 0.00000 -0.00006 -0.00007 2.11972
A78 2.14435 -0.00054 0.00000 -0.00188 -0.00188 2.14247
A79 2.24889 -0.00057 0.00000 -0.00141 -0.00143 2.24745
A80 1.88377 0.00113 0.00000 0.00414 0.00413 1.88790
A81 1.95134 0.00020 0.00000 0.00104 0.00104 1.95239
A82 1.95164 0.00021 0.00000 0.00143 0.00143 1.95307
A83 1.91279 -0.00011 0.00000 -0.00057 -0.00057 1.91222
A84 1.86199 -0.00025 0.00000 -0.00174 -0.00174 1.86025
A85 1.89081 -0.00008 0.00000 -0.00068 -0.00068 1.89013
A86 1.89305 0.00001 0.00000 0.00044 0.00044 1.89349
A87 2.15843 0.00062 0.00000 0.00164 0.00163 2.16006
A88 2.21690 0.00038 0.00000 0.00205 0.00205 2.21895
A89 1.88601 -0.00099 0.00000 -0.00312 -0.00312 1.88289
A90 1.89873 0.00002 0.00000 0.00027 0.00026 1.89899
A91 1.93749 0.00045 0.00000 0.00336 0.00336 1.94085
A92 1.95394 -0.00016 0.00000 -0.00173 -0.00173 1.95221
A93 1.87597 0.00003 0.00000 0.00169 0.00168 1.87766
A94 1.91253 -0.00013 0.00000 -0.00195 -0.00195 1.91058
A95 1.88354 -0.00021 0.00000 -0.00156 -0.00156 1.88198
A96 1.91292 0.00007 0.00000 0.00019 0.00019 1.91311
A97 1.95393 -0.00012 0.00000 -0.00042 -0.00042 1.95351
A98 1.94940 -0.00025 0.00000 -0.00165 -0.00165 1.94775
A99 1.89351 0.00007 0.00000 0.00064 0.00064 1.89415
A100 1.88945 -0.00002 0.00000 -0.00079 -0.00079 1.88867
A101 1.86237 0.00027 0.00000 0.00209 0.00209 1.86447
A102 2.09213 -0.00001 0.00000 -0.00005 -0.00005 2.09208
A103 2.09551 -0.00006 0.00000 -0.00041 -0.00043 2.09508
A104 2.09554 0.00008 0.00000 0.00045 0.00042 2.09596
A105 2.09582 -0.00001 0.00000 -0.00004 -0.00004 2.09578
A106 2.09705 -0.00001 0.00000 -0.00008 -0.00010 2.09695
A107 2.09031 0.00002 0.00000 0.00013 0.00010 2.09041
A108 2.09642 0.00003 0.00000 0.00013 0.00013 2.09654
A109 2.10103 0.00006 0.00000 0.00039 0.00036 2.10140
A110 2.08573 -0.00009 0.00000 -0.00053 -0.00055 2.08518
A111 2.10124 -0.00000 0.00000 0.00001 -0.00000 2.10124
A112 2.08952 -0.00004 0.00000 -0.00019 -0.00018 2.08933
A113 2.09243 0.00004 0.00000 0.00019 0.00017 2.09261
A114 1.94744 -0.00052 0.00000 -0.00371 -0.00371 1.94373
A115 1.94162 0.00000 0.00000 0.00064 0.00064 1.94225
A116 1.90948 0.00015 0.00000 0.00081 0.00080 1.91028
A117 1.87341 0.00032 0.00000 0.00220 0.00220 1.87561
A118 1.88513 -0.00003 0.00000 -0.00139 -0.00140 1.88374
A119 1.90534 0.00009 0.00000 0.00150 0.00150 1.90684
A120 2.10887 -0.00001 0.00000 -0.00080 -0.00081 2.10806
A121 2.28512 -0.00007 0.00000 0.00023 0.00022 2.28534
A122 1.88807 0.00008 0.00000 0.00086 0.00085 1.88893
A123 2.10984 -0.00010 0.00000 -0.00005 -0.00005 2.10979
A124 2.27728 0.00029 0.00000 0.00118 0.00117 2.27845
A125 1.88963 -0.00020 0.00000 -0.00166 -0.00166 1.88797
A126 2.25801 -0.00019 0.00000 -0.00103 -0.00104 2.25697
A127 2.17655 0.00006 0.00000 -0.00001 -0.00001 2.17654
A128 1.84835 0.00013 0.00000 0.00092 0.00091 1.84926
A129 1.90043 -0.00027 0.00000 -0.00031 -0.00032 1.90012
A130 2.20649 0.00019 0.00000 0.00042 0.00040 2.20689
A131 2.17614 0.00008 0.00000 -0.00022 -0.00023 2.17591
A132 2.21204 -0.00027 0.00000 -0.00107 -0.00107 2.21097
A133 1.90231 -0.00078 0.00000 -0.00313 -0.00312 1.89919
A134 2.16882 0.00105 0.00000 0.00417 0.00417 2.17298
A135 2.18149 0.00018 0.00000 0.00096 0.00096 2.18245
A136 1.90465 0.00072 0.00000 0.00253 0.00253 1.90718
A137 2.19661 -0.00090 0.00000 -0.00334 -0.00335 2.19326
A138 1.89640 0.00022 0.00000 0.00023 0.00023 1.89662
A139 2.17982 -0.00011 0.00000 -0.00011 -0.00012 2.17970
A140 2.20690 -0.00010 0.00000 -0.00005 -0.00006 2.20684
A141 2.25769 0.00021 0.00000 0.00103 0.00102 2.25872
A142 2.17656 -0.00019 0.00000 -0.00055 -0.00055 2.17601
A143 1.84893 -0.00002 0.00000 -0.00048 -0.00048 1.84845
D1 2.93952 0.00008 0.00000 0.00176 0.00176 2.94128
D2 -0.19591 -0.00001 0.00000 0.00025 0.00026 -0.19566
D3 -0.15607 -0.00013 0.00000 -0.00715 -0.00715 -0.16322
D4 2.99168 -0.00021 0.00000 -0.00866 -0.00866 2.98302
D5 0.09881 -0.00000 0.00000 0.00143 0.00142 0.10023
D6 -3.05690 -0.00020 0.00000 -0.00833 -0.00833 -3.06524
D7 -3.08516 0.00020 0.00000 0.00963 0.00963 -3.07553
D8 0.04232 0.00000 0.00000 -0.00012 -0.00012 0.04219
D9 -0.81724 0.00002 0.00000 -0.00650 -0.00648 -0.82372
D10 2.36827 -0.00018 0.00000 -0.01502 -0.01500 2.35327
D11 0.87319 -0.00007 0.00000 -0.00093 -0.00093 0.87225
D12 -2.19519 -0.00010 0.00000 -0.00132 -0.00132 -2.19650
D13 -2.27474 0.00001 0.00000 0.00062 0.00062 -2.27412
D14 0.94007 -0.00002 0.00000 0.00023 0.00024 0.94031
D15 0.16046 -0.00005 0.00000 -0.00258 -0.00258 0.15788
D16 -2.94584 0.00013 0.00000 0.00638 0.00639 -2.93946
D17 -2.97498 -0.00013 0.00000 -0.00407 -0.00408 -2.97905
D18 0.20191 0.00004 0.00000 0.00489 0.00489 0.20680
D19 -0.05291 0.00011 0.00000 0.00920 0.00922 -0.04369
D20 3.09776 -0.00002 0.00000 0.00008 0.00009 3.09785
D21 3.01789 0.00016 0.00000 0.00963 0.00963 3.02752
D22 -0.11463 0.00003 0.00000 0.00050 0.00051 -0.11412
D23 -3.10036 0.00004 0.00000 0.00002 0.00001 -3.10035
D24 0.09991 -0.00005 0.00000 -0.00373 -0.00373 0.09618
D25 0.11340 -0.00001 0.00000 -0.00048 -0.00048 0.11292
D26 -2.96952 -0.00010 0.00000 -0.00423 -0.00422 -2.97374
D27 -1.20391 0.00005 0.00000 0.00032 0.00036 -1.20354
D28 1.92895 0.00018 0.00000 0.00909 0.00914 1.93809
D29 0.03668 0.00001 0.00000 0.00035 0.00035 0.03702
D30 -3.10895 0.00012 0.00000 0.00604 0.00604 -3.10292
D31 -3.09607 -0.00011 0.00000 -0.00854 -0.00854 -3.10461
D32 0.04149 -0.00001 0.00000 -0.00286 -0.00286 0.03863
D33 0.04069 -0.00001 0.00000 -0.00112 -0.00112 0.03956
D34 -3.14030 -0.00019 0.00000 -0.00944 -0.00943 3.13345
D35 -3.08620 0.00019 0.00000 0.00902 0.00901 -3.07719
D36 0.01599 0.00002 0.00000 0.00070 0.00070 0.01670
D37 -0.07381 -0.00001 0.00000 -0.00104 -0.00104 -0.07484
D38 3.05371 -0.00014 0.00000 -0.00779 -0.00778 3.04594
D39 3.10667 0.00017 0.00000 0.00718 0.00718 3.11385
D40 -0.04900 0.00003 0.00000 0.00044 0.00044 -0.04856
D41 -0.02742 0.00004 0.00000 0.00292 0.00291 -0.02451
D42 3.08048 -0.00011 0.00000 -0.00558 -0.00558 3.07490
D43 3.12799 0.00018 0.00000 0.00956 0.00955 3.13754
D44 -0.04730 0.00002 0.00000 0.00106 0.00106 -0.04624
D45 -3.09913 0.00013 0.00000 0.00626 0.00625 -3.09288
D46 0.02822 -0.00004 0.00000 -0.00142 -0.00143 0.02679
D47 0.02827 -0.00001 0.00000 -0.00054 -0.00054 0.02773
D48 -3.12756 -0.00017 0.00000 -0.00822 -0.00822 -3.13578
D49 3.13851 -0.00021 0.00000 -0.00968 -0.00970 3.12881
D50 0.00987 0.00001 0.00000 -0.00004 -0.00005 0.00982
D51 0.03141 -0.00002 0.00000 -0.00089 -0.00089 0.03052
D52 -3.09723 0.00019 0.00000 0.00875 0.00876 -3.08847
D53 -0.03711 0.00000 0.00000 -0.00015 -0.00015 -0.03727
D54 3.13435 -0.00008 0.00000 -0.00423 -0.00423 3.13012
D55 3.04882 0.00006 0.00000 0.00331 0.00330 3.05212
D56 -0.06291 -0.00002 0.00000 -0.00077 -0.00077 -0.06368
D57 3.12984 0.00013 0.00000 0.00473 0.00473 3.13456
D58 0.00019 -0.00001 0.00000 -0.00116 -0.00117 -0.00097
D59 0.04591 0.00003 0.00000 0.00099 0.00099 0.04690
D60 -3.08374 -0.00011 0.00000 -0.00491 -0.00490 -3.08864
D61 -0.04219 -0.00000 0.00000 0.00084 0.00084 -0.04135
D62 3.13579 -0.00010 0.00000 -0.00487 -0.00487 3.13093
D63 3.06908 0.00007 0.00000 0.00493 0.00494 3.07402
D64 -0.03612 -0.00004 0.00000 -0.00077 -0.00077 -0.03689
D65 0.03459 0.00001 0.00000 0.00028 0.00028 0.03487
D66 -3.12368 0.00010 0.00000 0.00469 0.00469 -3.11899
D67 -3.07661 -0.00006 0.00000 -0.00383 -0.00383 -3.08043
D68 0.04831 0.00003 0.00000 0.00058 0.00058 0.04889
D69 0.04407 -0.00002 0.00000 -0.00097 -0.00097 0.04310
D70 -3.09333 -0.00013 0.00000 -0.00687 -0.00688 -3.10021
D71 -3.13449 0.00009 0.00000 0.00482 0.00483 -3.12967
D72 0.01129 -0.00002 0.00000 -0.00108 -0.00108 0.01021
D73 0.01311 0.00000 0.00000 0.00006 0.00006 0.01317
D74 3.13461 0.00010 0.00000 0.00474 0.00475 3.13935
D75 -3.11144 -0.00009 0.00000 -0.00443 -0.00444 -3.11588
D76 0.01005 0.00001 0.00000 0.00025 0.00025 0.01030
D77 0.00838 -0.00001 0.00000 -0.00020 -0.00020 0.00818
D78 3.13457 -0.00018 0.00000 -0.00825 -0.00824 3.12633
D79 -3.11867 0.00016 0.00000 0.00764 0.00763 -3.11104
D80 0.00751 -0.00001 0.00000 -0.00041 -0.00041 0.00711
D81 -0.02517 0.00001 0.00000 0.00041 0.00041 -0.02476
D82 3.11039 -0.00018 0.00000 -0.00824 -0.00823 3.10215
D83 3.13176 0.00019 0.00000 0.00843 0.00843 3.14019
D84 -0.01587 -0.00000 0.00000 -0.00021 -0.00021 -0.01608
D85 0.35106 0.00074 0.00000 0.02346 0.02346 0.37452
D86 2.52516 0.00023 0.00000 0.01884 0.01883 2.54399
D87 -1.71502 0.00021 0.00000 0.01812 0.01812 -1.69690
D88 0.99619 -0.00059 0.00000 -0.02062 -0.02063 0.97556
D89 -1.11454 -0.00014 0.00000 -0.01707 -0.01707 -1.13161
D90 -3.13072 -0.00017 0.00000 -0.01597 -0.01597 3.13650
D91 2.47607 0.00005 0.00000 0.00621 0.00622 2.48230
D92 -0.79969 0.00027 0.00000 0.01569 0.01570 -0.78399
D93 -1.62181 -0.00030 0.00000 0.00398 0.00395 -1.61786
D94 1.38561 -0.00008 0.00000 0.01346 0.01343 1.39903
D95 0.36220 -0.00006 0.00000 0.00493 0.00492 0.36712
D96 -2.91356 0.00016 0.00000 0.01442 0.01440 -2.89917
D97 -2.34261 -0.00003 0.00000 -0.00695 -0.00698 -2.34959
D98 1.04921 0.00004 0.00000 -0.00974 -0.00976 1.03945
D99 1.77731 -0.00031 0.00000 -0.01061 -0.01060 1.76671
D100 -1.11404 -0.00025 0.00000 -0.01340 -0.01339 -1.12743
D101 -0.30850 -0.00012 0.00000 -0.00776 -0.00777 -0.31626
D102 3.08333 -0.00005 0.00000 -0.01055 -0.01056 3.07278
D103 0.00082 -0.00001 0.00000 -0.00065 -0.00065 0.00017
D104 -3.13357 -0.00012 0.00000 -0.00534 -0.00534 -3.13891
D105 3.13042 0.00012 0.00000 0.00526 0.00526 3.13568
D106 -0.00397 0.00002 0.00000 0.00056 0.00057 -0.00340
D107 -0.03134 -0.00000 0.00000 0.00012 0.00012 -0.03123
D108 3.13025 -0.00010 0.00000 -0.00456 -0.00456 3.12569
D109 3.10304 0.00011 0.00000 0.00480 0.00480 3.10785
D110 -0.01855 0.00000 0.00000 0.00012 0.00013 -0.01842
D111 0.00458 0.00000 0.00000 0.00015 0.00015 0.00474
D112 3.13315 -0.00021 0.00000 -0.00952 -0.00952 3.12363
D113 -3.13097 0.00020 0.00000 0.00880 0.00881 -3.12216
D114 -0.00240 -0.00002 0.00000 -0.00087 -0.00087 -0.00327
D115 -0.00306 0.00002 0.00000 0.00092 0.00092 -0.00214
D116 3.13925 0.00027 0.00000 0.01222 0.01222 -3.13172
D117 3.14121 -0.00023 0.00000 -0.01059 -0.01059 3.13063
D118 0.00034 0.00002 0.00000 0.00071 0.00071 0.00105
D119 -3.13895 -0.00016 0.00000 -0.00778 -0.00778 3.13645
D120 0.00127 -0.00005 0.00000 -0.00159 -0.00159 -0.00032
D121 -0.00001 0.00009 0.00000 0.00363 0.00363 0.00362
D122 3.14020 0.00021 0.00000 0.00983 0.00983 -3.13316
D123 0.00162 0.00000 0.00000 0.00008 0.00008 0.00170
D124 -3.13976 0.00025 0.00000 0.01133 0.01133 -3.12843
D125 -3.14069 -0.00025 0.00000 -0.01126 -0.01126 3.13123
D126 0.00111 -0.00000 0.00000 -0.00001 -0.00001 0.00110
D127 -1.49806 0.00013 0.00000 0.00948 0.00948 -1.48858
D128 1.64491 0.00001 0.00000 0.00327 0.00328 1.64818
D129 1.63495 0.00003 0.00000 0.00106 0.00106 1.63601
D130 -1.50527 -0.00009 0.00000 -0.00514 -0.00514 -1.51041
D131 -3.10148 -0.00000 0.00000 -0.00432 -0.00432 -3.10580
D132 -0.01735 0.00006 0.00000 0.00306 0.00306 -0.01429
D133 0.04889 0.00010 0.00000 0.00429 0.00429 0.05318
D134 3.13301 0.00017 0.00000 0.01168 0.01168 -3.13850
D135 -3.12545 0.00009 0.00000 0.00232 0.00232 -3.12314
D136 -0.12067 -0.00005 0.00000 -0.00345 -0.00346 -0.12413
D137 0.00737 -0.00001 0.00000 -0.00628 -0.00629 0.00108
D138 3.01215 -0.00015 0.00000 -0.01206 -0.01206 3.00009
D139 -0.24266 0.00002 0.00000 0.00121 0.00121 -0.24145
D140 3.00840 0.00010 0.00000 0.00564 0.00564 3.01404
D141 3.00865 -0.00007 0.00000 -0.00626 -0.00627 3.00238
D142 -0.02348 0.00001 0.00000 -0.00182 -0.00184 -0.02532
D143 0.14440 -0.00002 0.00000 -0.00150 -0.00151 0.14289
D144 -3.00402 -0.00008 0.00000 -0.00504 -0.00503 -3.00905
D145 -3.11557 0.00009 0.00000 0.00655 0.00656 -3.10901
D146 0.01920 0.00003 0.00000 0.00302 0.00303 0.02223
D147 -1.06528 0.00003 0.00000 0.00231 0.00231 -1.06297
D148 2.04744 -0.00005 0.00000 -0.00428 -0.00428 2.04316
D149 1.02134 -0.00001 0.00000 0.00179 0.00179 1.02313
D150 -2.14912 -0.00008 0.00000 -0.00480 -0.00480 -2.15392
D151 3.12112 0.00007 0.00000 0.00287 0.00287 3.12400
D152 -0.04934 -0.00001 0.00000 -0.00372 -0.00372 -0.05306
D153 0.13106 -0.00002 0.00000 0.00349 0.00349 0.13456
D154 -2.96484 -0.00007 0.00000 -0.00237 -0.00237 -2.96721
D155 3.06316 0.00006 0.00000 0.00636 0.00635 3.06951
D156 -0.03274 0.00001 0.00000 0.00049 0.00049 -0.03225
D157 -0.15199 0.00001 0.00000 -0.00264 -0.00265 -0.15464
D158 2.95968 0.00009 0.00000 0.00249 0.00249 2.96217
D159 -3.07507 -0.00010 0.00000 -0.00553 -0.00554 -3.08061
D160 0.03659 -0.00001 0.00000 -0.00040 -0.00039 0.03620
D161 2.68232 -0.00021 0.00000 -0.00226 -0.00226 2.68006
D162 -0.45146 -0.00013 0.00000 0.00181 0.00182 -0.44965
D163 -1.54005 0.00011 0.00000 0.00195 0.00195 -1.53810
D164 1.60935 0.00019 0.00000 0.00603 0.00603 1.61538
D165 0.56609 0.00005 0.00000 0.00111 0.00111 0.56720
D166 -2.56769 0.00012 0.00000 0.00519 0.00519 -2.56250
D167 -3.07383 -0.00010 0.00000 -0.00440 -0.00440 -3.07823
D168 0.06578 -0.00003 0.00000 0.00268 0.00268 0.06846
D169 -0.97191 -0.00005 0.00000 -0.00373 -0.00373 -0.97564
D170 2.16770 0.00003 0.00000 0.00334 0.00334 2.17104
D171 1.11545 0.00004 0.00000 -0.00249 -0.00249 1.11296
D172 -2.02813 0.00011 0.00000 0.00459 0.00459 -2.02354
D173 0.00161 -0.00001 0.00000 -0.00041 -0.00041 0.00120
D174 -3.14138 0.00025 0.00000 0.01133 0.01133 -3.13005
D175 -3.14019 -0.00026 0.00000 -0.01166 -0.01166 3.13133
D176 -0.00000 0.00000 0.00000 0.00008 0.00008 0.00008
D177 -0.00341 -0.00001 0.00000 -0.00026 -0.00026 -0.00367
D178 3.13882 0.00024 0.00000 0.01095 0.01095 -3.13341
D179 3.13959 -0.00027 0.00000 -0.01196 -0.01196 3.12762
D180 -0.00137 -0.00002 0.00000 -0.00075 -0.00075 -0.00212
D181 0.00196 0.00004 0.00000 0.00126 0.00126 0.00322
[truncated: 52,289 more rows]

## Sheet: bodipy-ey-vertical-positive
Entering Gaussian System, Link 0=g09
Input=bodipy-ey-vertical-positive.gjf
Output=bodipy-ey-vertical-positive.log
Initial command:
/public/apps/gs/g09/l1.exe "/tmp/jianghao/scratch/14023.master/Gau-46641.inp" -scrdir="/tmp/jianghao/scratch/14023.master/"
Entering Link 1 = /public/apps/gs/g09/l1.exe PID= 46642.
Copyright (c) 1988,1990,1992,1993,1995,1998,2003,2009,2015,
Gaussian, Inc. All Rights Reserved.
This is part of the Gaussian(R) 09 program. It is based on
the Gaussian(R) 03 system (copyright 2003, Gaussian, Inc.),
the Gaussian(R) 98 system (copyright 1998, Gaussian, Inc.),
the Gaussian(R) 94 system (copyright 1995, Gaussian, Inc.),
the Gaussian 92(TM) system (copyright 1992, Gaussian, Inc.),
the Gaussian 90(TM) system (copyright 1990, Gaussian, Inc.),
the Gaussian 88(TM) system (copyright 1988, Gaussian, Inc.),
the Gaussian 86(TM) system (copyright 1986, Carnegie Mellon
University), and the Gaussian 82(TM) system (copyright 1983,
Carnegie Mellon University). Gaussian is a federally registered
trademark of Gaussian, Inc.
This software contains proprietary and confidential information,
including trade secrets, belonging to Gaussian, Inc.
This software is provided under written license and may be
used, copied, transmitted, or stored only in accord with that
written license.
The following legend is applicable only to US Government
contracts under FAR:
RESTRICTED RIGHTS LEGEND
Use, reproduction and disclosure by the US Government is
subject to restrictions as set forth in subparagraphs (a)
and (c) of the Commercial Computer Software - Restricted
Rights clause in FAR 52.227-19.
Gaussian, Inc.
340 Quinnipiac St., Bldg. 40, Wallingford CT 06492
---------------------------------------------------------------
Warning -- This program may not be used in any manner that
competes with the business of Gaussian, Inc. or will provide
assistance to any competitor of Gaussian, Inc. The licensee
of this program is prohibited from giving any competitor of
Gaussian, Inc. access to this program. By using this program,
the user acknowledges that Gaussian, Inc. is engaged in the
business of creating and licensing software in the field of
computational chemistry and represents and warrants to the
licensee that it is not a competitor of Gaussian, Inc. and that
it will not use this program in any manner prohibited above.
---------------------------------------------------------------
Cite this work as:
Gaussian 09, Revision E.01,
M. J. Frisch, G. W. Trucks, H. B. Schlegel, G. E. Scuseria,
M. A. Robb, J. R. Cheeseman, G. Scalmani, V. Barone, B. Mennucci,
G. A. Petersson, H. Nakatsuji, M. Caricato, X. Li, H. P. Hratchian,
A. F. Izmaylov, J. Bloino, G. Zheng, J. L. Sonnenberg, M. Hada,
M. Ehara, K. Toyota, R. Fukuda, J. Hasegawa, M. Ishida, T. Nakajima,
Y. Honda, O. Kitao, H. Nakai, T. Vreven, J. A. Montgomery, Jr.,
J. E. Peralta, F. Ogliaro, M. Bearpark, J. J. Heyd, E. Brothers,
K. N. Kudin, V. N. Staroverov, T. Keith, R. Kobayashi, J. Normand,
K. Raghavachari, A. Rendell, J. C. Burant, S. S. Iyengar, J. Tomasi,
M. Cossi, N. Rega, J. M. Millam, M. Klene, J. E. Knox, J. B. Cross,
V. Bakken, C. Adamo, J. Jaramillo, R. Gomperts, R. E. Stratmann,
O. Yazyev, A. J. Austin, R. Cammi, C. Pomelli, J. W. Ochterski,
R. L. Martin, K. Morokuma, V. G. Zakrzewski, G. A. Voth,
P. Salvador, J. J. Dannenberg, S. Dapprich, A. D. Daniels,
O. Farkas, J. B. Foresman, J. V. Ortiz, J. Cioslowski,
and D. J. Fox, Gaussian, Inc., Wallingford CT, 2013.
******************************************
Gaussian 09: ES64L-G09RevE.01 30-Nov-2015
28-May-2023
******************************************
%nprocshared=32
Will use up to 32 processors via shared memory.
%chk=bodipy-ey-vertical-positive.chk
%mem=32GB
----------------------------------------------------------------------
#p opt freq b3lyp/6-311g(d,p) empiricaldispersion=gd3bj scrf=(solvent=
water,pcm) nosymm field=y+20
----------------------------------------------------------------------
1/14=-1,18=20,19=15,26=3,38=1/1,3;
2/9=110,12=2,15=1,17=6,18=5,40=1/2;
3/5=4,6=6,7=101,11=2,14=2,15=20,16=1,25=1,30=1,70=2201,71=1,72=1,74=-5,124=41/1,2,3;
4//1;
5/5=2,38=5,53=1/2;
6/7=2,8=2,9=2,10=2,28=1/1;
7/30=1/1,2,3,16;
1/14=-1,18=20,19=15,26=3/3(2);
2/9=110,15=1/2;
99//99;
2/9=110,15=1/2;
3/5=4,6=6,7=101,11=2,14=2,15=20,16=1,25=1,30=1,70=2205,71=1,72=1,74=-5,124=41/1,2,3;
4/5=5,16=3,69=1/1;
5/5=2,38=5,53=1/2;
7/30=1/1,2,3,16;
1/14=-1,18=20,19=15,26=3/3(-5);
2/9=110,15=1/2;
6/7=2,8=2,9=2,10=2,19=2,28=1/1;
99/9=1/99;
Leave Link 1 at Sun May 28 01:18:43 2023, MaxMem= 4294967296 cpu: 2.6
(Enter /public/apps/gs/g09/l101.exe)
-
T
-
Symbolic Z-matrix:
Charge = 0 Multiplicity = 1
C -1.79458 1.23166 -1.1179
C -2.68356 0.65063 -0.21938
C -2.36693 -0.64112 0.43959
C -1.14209 -0.81514 1.06229
C -2.19713 2.3273 -1.92463
C -3.42152 2.91202 -1.7617
C -4.30035 2.46285 -0.74263
C -3.92092 1.33227 0.04733
C -3.2648 -1.75977 0.37654
C -2.93541 -2.96782 1.0724
C -1.70534 -3.0522 1.77432
C -3.8251 -4.07181 1.01908
C -5.53008 3.11912 -0.48371
C -6.35125 2.70678 0.53776
B 0.42074 0.43826 -0.27442
O -0.53468 0.78289 -1.32779
O -0.20234 0.16687 1.02208
C -0.81891 -2.00957 1.74688
C -4.44935 -1.75336 -0.40909
C -5.28034 -2.84713 -0.45752
C -4.97927 -4.01572 0.27756
C -5.96122 1.61885 1.3498
C -4.7836 0.95058 1.11006
H -1.49127 2.68827 -2.66291
H -3.71883 3.74802 -2.38485
H -1.46402 -3.96714 2.30361
H -3.56468 -4.97099 1.56686
H -5.804 3.96611 -1.10352
H -7.2861 3.21928 0.7315
H 0.14447 -2.0685 2.23831
H -4.69297 -0.87356 -0.98721
H -6.17298 -2.81532 -1.07159
H -5.64859 -4.86695 0.23857
H -6.59418 1.31096 2.17416
H -4.4987 0.12509 1.74788
C 5.76486 0.27401 -0.88329
C 7.12889 0.08626 -0.67629
C 3.39187 0.13128 -0.09913
N 1.24623 -0.77822 -0.81631
C 4.37416 -2.86142 -1.04564
N 1.43909 1.5818 0.02937
C -0.58829 -2.17003 -1.90102
C 4.83344 2.88865 0.98672
C 7.58722 -0.4362 0.53192
C 6.67706 -0.77249 1.53263
C 5.3124 -0.5888 1.32536
C 4.85201 -0.0637 0.11677
C -0.21223 3.41628 0.5405
C 2.8211 1.37553 0.17561
C 2.626 -0.93053 -0.58139
C 3.02143 -2.22024 -1.05457
C 1.87682 -2.79871 -1.58253
C 0.80154 -1.90037 -1.43376
C 1.15459 2.83395 0.455
C 2.34833 3.47352 0.83682
C 3.40139 2.58171 0.67601
H 5.40415 0.6802 -1.82084
H 7.83243 0.34841 -1.45751
H 5.09794 -2.28958 -1.63012
H 4.77933 -2.93982 -0.03515
H 4.30647 -3.8644 -1.46953
H -0.54937 -2.8811 -2.72779
H -1.18743 -2.62187 -1.10751
H -1.09107 -1.26328 -2.2242
H 4.90837 3.88811 1.41772
H 5.2599 2.17417 1.69315
H 5.4571 2.85474 0.09085
H 8.64893 -0.58046 0.69299
H 7.02833 -1.17879 2.47368
H 4.60048 -0.85095 2.09893
H -0.59106 3.69805 -0.44414
H -0.91866 2.70494 0.96907
H -0.18598 4.31243 1.16064
H 1.80611 -3.76973 -2.04937
H 2.41615 4.48658 1.20394
NAtoms= 75 NQM= 75 NQMF= 0 NMMI= 0 NMMIF= 0
NMic= 0 NMicF= 0.
Isotopes and Nuclear Properties:
(Nuclear quadrupole moments (NQMom) in fm**2, nuclear magnetic moments (NMagM)
in nuclear magnetons)
Atom 1 2 3 4 5 6 7 8 9 10
IAtWgt= 12 12 12 12 12 12 12 12 12 12
AtmWgt= 12.0000000 12.0000000 12.0000000 12.0000000 12.0000000 12.0000000 12.0000000 12.0000000 12.0000000 12.0000000
NucSpn= 0 0 0 0 0 0 0 0 0 0
AtZEff= 0.0000000 0.0000000 0.0000000 0.0000000 0.0000000 0.0000000 0.0000000 0.0000000 0.0000000 0.0000000
[truncated: 31,066 more rows]

## Sheet: bodipy-ez-vertical-negative
Entering Gaussian System, Link 0=g09
[truncated: 27,584 more rows]

## Sheet: bodipy-ez-vertical-positive
Entering Gaussian System, Link 0=g09
[truncated: 31,256 more rows]

[truncated: 6 more sheets: Dimer 1-Structure, Dimer 2-Structure, Dimer 3-Structure, Dimer 1-Charge density, Dimer 2-Charge density, Dimer 3-Charge density]
