# Supplementary material for: Collective chiroptical activity through the interplay of excitonic and charge-transfer effects in localized plasmonic fields
Source: Nat Commun. 2024 Jun 6;15:4846. doi: 10.1038/s41467-024-49086-3 (PMC11156920; doi:10.1038/s41467-024-49086-3)
Supplement: Supplementary file 9 — Source Data [file 41467_2024_49086_MOESM9_ESM.xlsx]

## Sheet: Figure 1c
	2nt (S)	2nt (R)
Wavelength (nm)	CD (mdeg)	CD (mdeg)
700	-0.14958	0.05636
698	-0.05446	0.06062
696	-0.05547	0.02999
694	-0.02321	0.02394
692	-0.06246	0.05216
690	0.03445	0.14473
688	0.06286	0.18543
686	-0.0698	0.01846
684	0.00867	0.10723
682	0.01292	0.10436
680	-0.06051	0.07606
678	-0.00612	0.09426
676	-0.01425	0.09182
674	-0.04105	0.03377
672	-0.04098	0.08849
670	0.02345	0.11348
668	0.05821	0.14858
666	-0.01281	0.05752
664	-0.04188	0.08594
662	-0.03032	0.07265
660	0.08198	0.17069
658	0.06208	0.13467
656	0.02888	0.05455
654	0.08989	0.08785
652	0.09624	0.1682
650	0.05953	0.13817
648	0.09012	0.09399
646	0.06514	0.17482
644	0.06294	0.13084
642	0.13014	0.16159
640	0.05685	0.14379
638	0.03629	0.05898
636	0.08684	0.16036
634	0.06796	0.12274
632	0.16833	0.13361
630	0.09317	0.13553
628	0.19583	0.18014
626	0.10227	0.17134
624	0.12154	0.18865
622	0.10617	0.21108
620	0.10981	0.16761
618	0.11493	0.18749
616	0.14037	0.22008
614	0.08445	0.2122
612	0.11035	0.16739
610	0.19569	0.16445
608	0.1591	0.18398
606	0.19168	0.18184
604	0.15877	0.18977
602	0.17454	0.232
600	0.2501	0.25178
598	0.18654	0.18694
596	0.24664	0.21516
594	0.14199	0.09021
592	0.20646	0.17362
590	0.18267	0.15438
588	0.22765	0.20206
586	0.26212	0.2339
584	0.30437	0.26736
582	0.29115	0.31792
580	0.22969	0.23182
578	0.25768	0.30705
576	0.23945	0.20612
574	0.25636	0.22701
572	0.3319	0.26504
570	0.26103	0.23835
568	0.32913	0.31127
566	0.34104	0.28246
564	0.38164	0.34399
562	0.3939	0.38064
560	0.35596	0.32396
558	0.45348	0.29548
556	0.47472	0.2931
554	0.48726	0.30842
552	0.62265	0.24409
550	0.59115	0.27385
548	0.68706	0.21562
546	0.83065	0.20262
544	0.94166	0.05494
542	1.23465	-0.03287
540	1.57349	-0.24756
538	2.13461	-0.54329
536	2.7766	-1.13371
534	3.57045	-1.86048
532	4.58265	-3.07782
530	5.79594	-4.12324
528	7.13382	-5.35531
526	8.05625	-6.53615
524	8.84999	-7.34206
522	9.48108	-8.02582
520	9.70722	-8.17339
518	9.79765	-7.88065
516	9.5543	-7.39628
514	9.11138	-6.44389
512	8.37207	-5.41604
510	7.50632	-4.24362
508	6.3668	-3.12216
506	5.38623	-2.28964
504	4.33611	-1.45868
502	3.50165	-0.9857
500	2.75856	-0.50745
498	2.23882	-0.26279
496	1.86528	-0.08352
494	1.63999	-0.06915
492	1.50183	-0.0144
490	1.26728	0.10611
488	1.14271	0.16893
486	0.95279	0.33731
484	0.72037	0.38205
482	0.57008	0.50566
480	0.38701	0.57025
478	0.36338	0.46603
476	0.30393	0.56128
474	0.30904	0.42022
472	0.29241	0.3121
470	0.33265	0.25742
468	0.33587	0.25706
466	0.34421	0.18653
464	0.3835	0.18015
462	0.35405	0.11445
460	0.35294	0.16736
458	0.26971	0.17564
456	0.33265	0.22175
454	0.33013	0.19624
452	0.32993	0.19381
450	0.2769	0.19375
448	0.27245	0.16466
446	0.2424	0.24404
444	0.24043	0.21708
442	0.20665	0.2484
440	0.23759	0.28457
438	0.14971	0.32039
436	0.17482	0.2888
434	0.20832	0.2836
432	0.1736	0.34873
430	0.15564	0.36272
428	0.20149	0.34769
426	0.17302	0.35301
424	0.11996	0.37309
422	0.17885	0.41095
420	0.15461	0.38753
418	0.18668	0.36967
416	0.18117	0.44916
414	0.22037	0.45549
412	0.15559	0.4309
410	0.16851	0.4319
408	0.18505	0.44909
406	0.23434	0.48182
404	0.27885	0.41965
402	0.25863	0.41869
400	0.28915	0.39839
398	0.31886	0.42031
396	0.3468	0.3548
394	0.38671	0.42211
392	0.43359	0.45821
390	0.44179	0.39838
388	0.47809	0.4068
386	0.51698	0.40176
384	0.48176	0.33665
382	0.56923	0.40192
380	0.60738	0.48525
378	0.66503	0.44946
376	0.64952	0.50894
374	0.63562	0.51676
372	0.59402	0.48604
370	0.59652	0.44542
368	0.65196	0.5953
366	0.57471	0.64945
364	0.5022	0.73675
362	0.36491	1.00715
360	0.17874	1.19601
358	-0.06659	1.51929
356	-0.38369	1.79939
354	-0.66632	2.18608
352	-1.02811	2.56899
350	-1.37882	2.85437
348	-1.58923	3.11011
346	-1.67762	3.21602
344	-1.697	3.28626
342	-1.80654	3.26485
340	-1.84497	3.26267
338	-1.77194	3.29252
336	-1.76104	3.36341
334	-1.74379	3.32206
332	-1.59336	3.26966
330	-1.45162	3.23262
328	-1.25403	3.00477
326	-0.96974	2.82489
324	-0.69363	2.69681
322	-0.46206	2.58832
320	-0.21191	2.50906
318	-0.07637	2.46868
316	0.15199	2.3574
314	0.35313	2.36819
312	0.62288	2.29946
310	0.76812	2.28228
308	0.96309	2.2976
306	1.15129	2.41007
304	1.28319	2.38218
302	1.68087	2.52472
300	2.03517	2.79195

## Sheet: Figure 1d
	14nt	7nt	2nt	cBDP (S)
Wavelength (nm)	CD (mdeg)	CD (mdeg)	CD (mdeg)	CD (mdeg)
700	-0.25703	-0.14263	-0.23434	-0.20692
698	-0.28996	-0.1846	-0.26246	-0.21066
696	-0.25822	-0.13862	-0.25512	-0.21081
694	-0.26855	-0.14057	-0.26604	-0.20959
692	-0.25986	-0.15956	-0.26592	-0.20916
690	-0.22994	-0.14568	-0.2496	-0.21034
688	-0.20771	-0.11644	-0.23049	-0.2106
686	-0.22515	-0.16967	-0.23404	-0.21172
684	-0.22364	-0.19083	-0.23258	-0.2136
682	-0.20753	-0.17093	-0.22394	-0.21208
680	-0.19765	-0.17486	-0.22763	-0.20578
678	-0.19902	-0.19346	-0.23051	-0.21142
676	-0.20821	-0.18732	-0.23455	-0.20803
674	-0.20619	-0.19358	-0.22353	-0.20969
672	-0.22489	-0.20787	-0.22663	-0.20982
670	-0.26911	-0.21977	-0.24728	-0.20959
668	-0.28136	-0.20084	-0.23507	-0.21253
666	-0.28477	-0.21699	-0.23377	-0.20782
664	-0.28347	-0.20768	-0.25442	-0.20888
662	-0.29212	-0.22512	-0.26395	-0.20853
660	-0.25486	-0.20054	-0.23573	-0.20871
658	-0.27289	-0.19709	-0.24784	-0.21036
656	-0.30381	-0.22316	-0.26452	-0.20592
654	-0.3196	-0.25319	-0.25872	-0.21108
652	-0.29648	-0.22872	-0.2336	-0.20875
650	-0.32289	-0.2388	-0.24957	-0.20829
648	-0.30858	-0.26326	-0.26498	-0.20855
646	-0.27687	-0.2421	-0.26189	-0.21068
644	-0.26026	-0.22389	-0.24453	-0.20735
642	-0.24658	-0.22891	-0.23919	-0.20982
640	-0.23038	-0.24469	-0.22707	-0.21004
638	-0.22384	-0.25327	-0.21479	-0.20938
636	-0.18691	-0.22244	-0.19117	-0.20755
634	-0.17514	-0.20686	-0.18083	-0.2074
632	-0.18785	-0.19209	-0.19108	-0.20707
630	-0.16056	-0.15463	-0.17265	-0.20725
628	-0.17178	-0.16272	-0.18409	-0.20789
626	-0.18271	-0.18328	-0.17886	-0.20507
624	-0.19814	-0.17499	-0.18707	-0.20672
622	-0.19672	-0.16571	-0.17246	-0.20939
620	-0.19858	-0.18257	-0.19343	-0.20766
618	-0.17698	-0.18227	-0.17997	-0.20991
616	-0.15473	-0.14829	-0.16336	-0.20749
614	-0.14516	-0.16076	-0.1716	-0.20941
612	-0.16394	-0.18058	-0.17759	-0.20852
610	-0.15208	-0.1639	-0.16536	-0.20701
608	-0.17674	-0.16472	-0.17733	-0.20563
606	-0.18024	-0.17748	-0.1862	-0.20675
604	-0.17375	-0.15999	-0.1683	-0.21034
602	-0.16423	-0.1545	-0.17234	-0.20467
600	-0.20143	-0.16601	-0.19585	-0.20634
598	-0.18689	-0.15418	-0.19475	-0.20774
596	-0.19992	-0.15382	-0.19397	-0.20733
594	-0.17788	-0.14659	-0.18928	-0.20976
592	-0.19793	-0.16369	-0.1887	-0.20897
590	-0.19255	-0.16651	-0.15956	-0.20884
588	-0.20033	-0.19097	-0.16253	-0.20745
586	-0.18747	-0.20814	-0.16979	-0.20583
584	-0.2087	-0.22096	-0.17905	-0.20877
582	-0.17687	-0.20922	-0.17238	-0.2085
580	-0.16949	-0.23142	-0.17689	-0.20826
578	-0.17708	-0.2112	-0.16761	-0.20715
576	-0.17216	-0.19817	-0.16647	-0.20717
574	-0.15038	-0.18163	-0.16916	-0.20626
572	-0.1977	-0.20369	-0.20663	-0.20792
570	-0.18464	-0.17979	-0.21192	-0.20783
568	-0.17832	-0.17034	-0.19765	-0.20617
566	-0.20657	-0.1617	-0.21698	-0.20913
564	-0.24116	-0.18332	-0.21047	-0.20713
562	-0.20781	-0.17526	-0.19442	-0.20565
560	-0.22556	-0.18226	-0.18665	-0.2048
558	-0.22786	-0.20135	-0.19587	-0.20652
556	-0.21696	-0.21852	-0.18986	-0.20685
554	-0.1935	-0.20894	-0.18884	-0.2064
552	-0.1906	-0.18635	-0.17671	-0.2041
550	-0.19189	-0.18698	-0.1715	-0.20428
548	-0.17936	-0.15093	-0.14586	-0.20552
546	-0.18184	-0.10773	-0.11035	-0.20502
544	-0.1695	-0.05774	-0.07338	-0.20372
542	-0.14751	-0.00018876	-0.01033	-0.20201
540	-0.1249	0.09504	0.0711	-0.19961
538	-0.06653	0.19231	0.16443	-0.19721
536	-0.02222	0.2919	0.30226	-0.19331
534	-0.00107	0.43681	0.47364	-0.18562
532	0.04013	0.58407	0.66323	-0.17726
530	0.08586	0.7569	0.86451	-0.16584
528	0.11388	0.93402	1.08908	-0.14713
526	0.16989	1.08878	1.26251	-0.1238
524	0.22677	1.18075	1.41956	-0.09044
522	0.26948	1.22604	1.5427	-0.04705
520	0.3273	1.24889	1.60446	0.00819
518	0.33611	1.20682	1.58824	0.07613
516	0.33734	1.1546	1.55824	0.16502
514	0.33715	1.08093	1.45447	0.2487
512	0.32954	1.00558	1.3014	0.32627
510	0.29149	0.9052	1.1383	0.37458
508	0.27939	0.79402	0.97848	0.39456
506	0.22269	0.66713	0.78223	0.37211
504	0.19201	0.54455	0.62079	0.32699
502	0.16356	0.44525	0.48544	0.26676
500	0.12397	0.32333	0.36043	0.1981
498	0.07596	0.24477	0.26319	0.13789
496	0.05304	0.17829	0.20923	0.08888
494	0.01125	0.12944	0.16346	0.04826
492	-0.04557	0.08774	0.11609	0.01597
490	-0.06198	0.08049	0.09953	-0.0068
488	-0.06635	0.04829	0.0646	-0.0267
486	-0.07504	0.01306	0.03758	-0.04131
484	-0.10427	-0.01266	-0.000995969	-0.05015
482	-0.11673	-0.04537	-0.02562	-0.05456
480	-0.12365	-0.07742	-0.05487	-0.05953
478	-0.15268	-0.09273	-0.07291	-0.06473
476	-0.16055	-0.07769	-0.08714	-0.07135
474	-0.12943	-0.08279	-0.09053	-0.08122
472	-0.12552	-0.05229	-0.09631	-0.09526
470	-0.11501	-0.04986	-0.11842	-0.11059
468	-0.09322	-0.02721	-0.12509	-0.12228
466	-0.09931	-0.01723	-0.12608	-0.13684
464	-0.12161	-0.01434	-0.12309	-0.14641
462	-0.10186	-0.03185	-0.11459	-0.1566
460	-0.13518	-0.02783	-0.09966	-0.16499
458	-0.14558	-0.01815	-0.07319	-0.16862
456	-0.13709	0.003	-0.05371	-0.17578
454	-0.14046	0.00622	-0.04165	-0.17931
452	-0.11768	0.03625	-0.02945	-0.18286
450	-0.07955	0.05556	-0.00842	-0.18859
448	-0.06278	0.03998	-0.00759	-0.18845
446	-0.05372	0.02396	-0.01499	-0.19143
444	-0.03901	0.03308	-2.51773e-05	-0.19617
442	-0.03826	0.01401	0.01556	-0.19868
440	-0.03537	0.01546	0.01542	-0.20214
438	-0.02649	0.02776	0.01995	-0.2045
436	-0.02242	0.03699	0.02546	-0.20659
434	0.04346	0.07793	0.03174	-0.20723
432	0.05776	0.10808	0.04817	-0.21076
430	0.06413	0.12686	0.05676	-0.21079
428	0.07227	0.16945	0.08095	-0.21416
426	0.08323	0.20343	0.0802	-0.21404
424	0.06692	0.18678	0.08058	-0.21436
422	0.05246	0.17553	0.09357	-0.21531
420	0.0464	0.16483	0.10893	-0.21528
418	0.05968	0.15639	0.12654	-0.21511
416	0.09492	0.16669	0.18335	-0.21578
414	0.09513	0.18133	0.22962	-0.21714
412	0.13796	0.21199	0.21392	-0.21677
410	0.13415	0.1994	0.19459	-0.21572
408	0.14765	0.19578	0.16171	-0.21491
406	0.13522	0.19207	0.14264	-0.21492
404	0.09932	0.20605	0.11665	-0.21155
402	0.0608	0.16159	0.13473	-0.21042
400	0.08055	0.17985	0.14953	-0.20863
398	0.07902	0.167	0.1404	-0.20639
396	0.06498	0.15756	0.12237	-0.20422
394	0.045	0.13189	0.07048	-0.20431
392	0.04217	0.12572	-0.00955	-0.20155
390	0.05033	0.09024	-0.05507	-0.19969
388	0.03863	0.10492	-0.08829	-0.1983
386	0.0319	0.05475	-0.13509	-0.1981
384	0.07447	0.02709	-0.16038	-0.19813
382	0.07744	0.03749	-0.15468	-0.19817
380	0.05874	0.05287	-0.17968	-0.19863
378	0.05406	0.02107	-0.19501	-0.19607
376	0.07257	0.0066	-0.2301	-0.19722
374	0.05711	0.02343	-0.25807	-0.19644
372	0.05329	0.00521	-0.29465	-0.19706
370	0.05482	-0.01837	-0.31019	-0.19876
368	0.03392	-0.06095	-0.35763	-0.2018
366	-0.00444	-0.06881	-0.39995	-0.20498
364	-0.03543	-0.13096	-0.45212	-0.21466
362	-0.08995	-0.16035	-0.50526	-0.22759
360	-0.14563	-0.22343	-0.58426	-0.24544
358	-0.19962	-0.30048	-0.65886	-0.27017
356	-0.2549	-0.39537	-0.73834	-0.30213
354	-0.28724	-0.46768	-0.80888	-0.33876
352	-0.34257	-0.56834	-0.89706	-0.37847
350	-0.39643	-0.64033	-0.95861	-0.41655
348	-0.44881	-0.69973	-1.02695	-0.44026
346	-0.45651	-0.74218	-1.05654	-0.45542
344	-0.50449	-0.77792	-1.08512	-0.45832
342	-0.51096	-0.80686	-1.08221	-0.45454
340	-0.50796	-0.81019	-1.06965	-0.44994
338	-0.5176	-0.80006	-1.03971	-0.44511
336	-0.54877	-0.80799	-1.03393	-0.44528
334	-0.5221	-0.79426	-1.01538	-0.44654
332	-0.49763	-0.78664	-0.9962	-0.44474
330	-0.49807	-0.78725	-0.98738	-0.43599
328	-0.47987	-0.75736	-0.95544	-0.41584
326	-0.42424	-0.6924	-0.89277	-0.39275
324	-0.4175	-0.64034	-0.83871	-0.37221
322	-0.42096	-0.57853	-0.79561	-0.35353
320	-0.38094	-0.50442	-0.73813	-0.33823
318	-0.33443	-0.44804	-0.69543	-0.3264
316	-0.31305	-0.40561	-0.67354	-0.31735
314	-0.27558	-0.36118	-0.63536	-0.30144
312	-0.246	-0.32618	-0.60168	-0.2886
310	-0.20208	-0.29026	-0.58245	-0.2799
308	-0.16673	-0.24389	-0.53562	-0.26614
306	-0.16214	-0.22101	-0.50464	-0.25539
304	-0.14732	-0.16597	-0.47105	-0.24964
302	-0.13127	-0.09719	-0.4228	-0.23798
300	-0.14088	0.02519	-0.36691	-0.23076

## Sheet: Figure 1e
	14nt	7nt	2nt	cBDP (S)
Wavelength (nm)	CD (mdeg)	CD (mdeg)	CD (mdeg)	CD (mdeg)
700	0.1922	-0.00456	0.00649	0.03828
698	0.12621	-0.00608	-0.00974	0.02903
696	0.08794	-0.01385	0.00043	0.02865
694	0.08912	-0.01678	0.00077	0.03166
692	0.09118	-0.00975	0.00525	0.03273
690	0.10686	-0.00241	0.00723	0.02981
688	0.10075	-0.01775	0.00888	0.02917
686	0.13037	-0.00219	0.01023	0.02639
684	0.09599	-0.02043	0.01291	0.02176
682	0.09584	-0.01414	0.00424	0.02552
680	0.07048	-0.01927	0.00428	0.0411
678	0.0879	-0.01011	-0.000594471	0.02715
676	0.05031	-0.000994415	0.01754	0.03552
674	0.05034	0.00806	0.01991	0.03142
672	0.05058	-0.00256	0.01011	0.03109
670	0.04677	-0.000350415	0.01905	0.03167
668	0.0534	0.01008	0.01628	0.0244
666	0.08064	0.02014	0.00137	0.03603
664	0.08409	0.0255	0.00223	0.03343
662	0.08848	0.02721	0.01657	0.0343
660	0.09523	0.02327	0.01809	0.03383
658	0.08812	0.01024	0.02043	0.02977
656	0.07791	-0.02183	0.01938	0.04075
654	0.08293	-0.02125	0.01479	0.02797
652	0.07824	-0.01677	0.01985	0.03376
650	0.08841	-0.00559	0.01298	0.03488
648	0.07743	8.8e-05	0.00896	0.03423
646	0.06243	0.02104	0.00823	0.02897
644	0.06367	0.02723	0.01625	0.03722
642	0.06373	0.02201	0.01537	0.0311
640	0.04987	0.01547	0.0298	0.03055
638	0.06225	0.01343	0.02387	0.03218
636	0.07899	0.01331	0.03252	0.03671
634	0.05339	0.00381	0.03633	0.03709
632	0.05089	0.01026	0.04538	0.03791
630	0.05569	0.00387	0.04056	0.03745
628	0.04194	0.01718	0.05598	0.03586
626	0.0419	0.0197	0.04614	0.04284
624	0.06586	0.03019	0.03296	0.03877
622	0.05947	0.02554	0.04663	0.03217
620	0.04073	0.01758	0.05161	0.03644
618	0.05214	0.01135	0.0547	0.03089
616	0.04951	0.00655	0.06088	0.03685
614	0.03819	-0.00731	0.06071	0.03212
612	0.01702	-0.02649	0.05291	0.03431
610	0.02841	-0.01825	0.04244	0.03805
608	0.02261	-0.01523	0.0354	0.04147
606	0.00814	-0.02362	0.03944	0.03868
604	0.01388	-0.01014	0.05072	0.02982
602	0.03706	0.01728	0.05114	0.04384
600	0.04452	0.03292	0.06189	0.03971
598	0.04877	0.01751	0.06478	0.03625
596	0.04854	0.01369	0.06739	0.03725
594	0.04191	-0.00306	0.06609	0.03124
592	0.02679	-0.00829	0.05105	0.0332
590	0.00726	-0.03596	0.05963	0.03352
588	-0.01525	-0.04289	0.06836	0.03696
586	-0.02229	-0.02282	0.07088	0.04097
584	-0.00974	0.000676	0.08425	0.03369
582	0.000134	-0.00817	0.09837	0.03437
580	-0.00279	0.00446	0.08143	0.03495
578	0.00138	-0.00218	0.09078	0.0377
576	-0.00639	-0.03172	0.10384	0.03765
574	-0.0377	-0.05023	0.09955	0.03991
572	-0.05363	-0.06283	0.09158	0.03579
570	-0.03997	-0.06836	0.13476	0.03602
568	-0.03167	-0.04974	0.13972	0.04012
566	-0.02927	-0.04521	0.14938	0.03281
564	-0.02828	-0.04493	0.16245	0.03774
562	-0.02272	-0.0376	0.18777	0.0414
560	-0.03495	-0.05218	0.19144	0.04352
558	-0.05136	-0.05079	0.2043	0.03926
556	-0.05478	-0.06125	0.22329	0.03844
554	-0.05328	-0.05499	0.25013	0.03955
552	-0.05125	-0.02857	0.2867	0.04525
550	-0.04785	-0.00258	0.32773	0.04479
548	-0.05863	0.01578	0.36624	0.04174
546	-0.03891	0.0512	0.42372	0.04297
544	-0.02216	0.06721	0.50312	0.0462
542	-0.01904	0.09912	0.6009	0.05041
540	0.02905	0.17344	0.72116	0.05635
538	0.11818	0.26969	0.91806	0.06229
536	0.22744	0.41727	1.14729	0.07194
534	0.36825	0.63888	1.43179	0.09095
532	0.55673	0.87658	1.75574	0.11163
530	0.74471	1.12866	2.08814	0.13989
528	0.95452	1.35607	2.39409	0.18617
526	1.14637	1.54548	2.6695	0.24388
524	1.31166	1.61451	2.89827	0.32638
522	1.43289	1.59479	3.03862	0.4337
520	1.51523	1.50699	3.1004	0.57035
518	1.51969	1.35941	3.09031	0.73839
516	1.49365	1.18755	2.99171	0.95828
514	1.44418	1.05139	2.78995	1.16524
512	1.35702	0.91707	2.55048	1.35713
510	1.21937	0.79367	2.25744	1.47662
508	1.07413	0.69667	1.94269	1.52603
506	0.89968	0.5876	1.63421	1.47049
504	0.69706	0.48311	1.3407	1.35889
502	0.51703	0.39581	1.08111	1.20991
500	0.36881	0.33047	0.87764	1.04008
498	0.2555	0.26959	0.72073	0.89115
496	0.16758	0.23653	0.60004	0.76993
494	0.10085	0.18504	0.52498	0.66947
492	0.03497	0.14421	0.462	0.58958
490	-0.02308	0.10515	0.39846	0.53327
488	-0.05796	0.06199	0.32592	0.48405
486	-0.10659	0.0368	0.2682	0.4479
484	-0.11621	0.03974	0.21176	0.42605
482	-0.14579	0.03309	0.14341	0.41514
480	-0.1597	0.03136	0.11038	0.40285
478	-0.1826	0.03819	0.09267	0.38999
476	-0.18783	0.03119	0.06517	0.3736
474	-0.21064	0.02779	0.04684	0.3492
472	-0.20772	0.04646	0.05583	0.31447
470	-0.21119	0.04605	0.0521	0.27654
468	-0.21966	0.05717	0.05876	0.24763
466	-0.23082	0.05441	0.05895	0.21163
464	-0.21631	0.04897	0.05768	0.18795
462	-0.21892	0.04388	0.05622	0.16274
460	-0.2069	0.03388	0.05223	0.14199
458	-0.19029	0.03185	0.04481	0.133
456	-0.1866	0.0281	0.04952	0.1153
454	-0.19976	0.0292	0.05436	0.10656
452	-0.18967	0.01907	0.05481	0.09777
450	-0.20252	0.02372	0.0504	0.08361
448	-0.21405	0.00788	0.04667	0.08395
446	-0.20853	0.01675	0.04158	0.0766
444	-0.20094	0.01478	0.03675	0.06487
442	-0.18361	0.01537	0.02959	0.05866
440	-0.1493	0.01935	0.05562	0.0501
438	-0.14481	0.01887	0.04683	0.04427
436	-0.1316	0.01305	0.04951	0.03909
434	-0.12199	0.00658	0.05654	0.0375
432	-0.11481	0.01244	0.06242	0.02878
430	-0.13661	-0.01258	0.04807	0.02869
428	-0.11663	-0.01041	0.05026	0.02036
426	-0.10624	-0.01976	0.04902	0.02067
424	-0.09654	-0.02335	0.03932	0.01987
422	-0.09345	-0.03225	0.03613	0.01751
420	-0.07963	-0.02076	0.04002	0.0176
418	-0.07522	-0.03674	0.05615	0.01803
416	-0.06638	-0.024	0.07109	0.01635
414	-0.04879	-0.02677	0.07751	0.013
412	-0.03664	-0.03563	0.08411	0.0139
410	-0.01976	-0.04703	0.08286	0.0165
408	-0.00851	-0.03749	0.08674	0.01851
406	-0.000915768	-0.02369	0.0833	0.01849
404	0.01315	-0.00512	0.09605	0.02682
402	0.02825	0.0129	0.11159	0.02962
400	0.06123	0.02942	0.12953	0.03405
398	0.07155	0.03357	0.14854	0.03958
396	0.06829	0.02569	0.17139	0.04495
394	0.06157	0.03469	0.18406	0.04472
392	0.05459	0.03684	0.19405	0.05156
390	0.0365	0.04382	0.19861	0.05617
388	0.06047	0.0564	0.21096	0.05959
386	0.08573	0.06132	0.21384	0.06009
384	0.08606	0.06858	0.21373	0.06
382	0.09306	0.07585	0.21428	0.05991
380	0.10391	0.0707	0.21889	0.05878
378	0.09109	0.07709	0.21897	0.0651
376	0.08462	0.08564	0.22569	0.06225
374	0.09526	0.07206	0.24997	0.0642
372	0.09798	0.06647	0.25492	0.06266
370	0.08205	0.05397	0.25484	0.05846
368	0.06084	0.02874	0.25385	0.05093
366	0.03325	-0.00342	0.23051	0.04306
364	0.00342	-0.03389	0.21005	0.01912
362	-0.04789	-0.07539	0.16924	-0.01286
360	-0.09712	-0.11171	0.12319	-0.05702
358	-0.15399	-0.16535	0.04162	-0.11818
356	-0.21867	-0.24193	-0.03746	-0.19723
354	-0.29806	-0.31877	-0.13698	-0.28784
352	-0.36793	-0.39364	-0.22297	-0.38606
350	-0.45712	-0.45096	-0.304	-0.48025
348	-0.52514	-0.50419	-0.35566	-0.53889
346	-0.57225	-0.52853	-0.39083	-0.57639
344	-0.60935	-0.53464	-0.40484	-0.58356
342	-0.62629	-0.53932	-0.41069	-0.57422
340	-0.6263	-0.55051	-0.40187	-0.56283
338	-0.61829	-0.5238	-0.39187	-0.55088
336	-0.61643	-0.51287	-0.37814	-0.55131
334	-0.58074	-0.50217	-0.36567	-0.55444
332	-0.55055	-0.46753	-0.32125	-0.54998
330	-0.48214	-0.40894	-0.27812	-0.52834
328	-0.43514	-0.35438	-0.23858	-0.4785
326	-0.37164	-0.29101	-0.167	-0.42137
324	-0.31818	-0.21263	-0.08294	-0.37058
322	-0.26027	-0.14625	-0.02442	-0.32437
320	-0.21143	-0.08761	0.02564	-0.28653
318	-0.1537	-0.04752	0.10696	-0.25727
316	-0.07564	0.00823	0.15114	-0.23487
314	-0.0378	0.06608	0.20141	-0.19553
312	0.0176	0.09119	0.25682	-0.16377
310	0.04169	0.14722	0.3236	-0.14224
308	0.07873	0.20724	0.39225	-0.10821
306	0.11145	0.27878	0.46242	-0.08163
304	0.17181	0.30619	0.55107	-0.06739
302	0.23419	0.377	0.65756	-0.03856
300	0.30836	0.3579	0.80765	-0.02069

## Sheet: Figure 2g
	7nt (low)	7nt (high)	7nt with T6	7nt with T30
Wavelength (nm)	CD (mdeg)	CD (mdeg)	CD (mdeg)	CD (mdeg)
700	0.44405	-0.07614	-0.29387	-0.15038
698	0.47792	-0.03429	-0.29503	-0.0956
696	0.50463	-0.00593	-0.29436	-0.0547
694	0.52419	0.00894	-0.29188	-0.02767
692	0.53658	0.01031	-0.28757	-0.01453
690	0.54182	-0.00182	-0.28143	-0.01526
688	0.50672	-0.06376	-0.2706	-0.06792
686	0.51263	-0.07762	-0.26881	-0.08934
684	0.51126	-0.07216	-0.22567	-0.07811
682	0.5234	-0.04239	-0.23104	-0.08398
680	0.57759	-0.02745	-0.25437	-0.10313
678	0.58096	-0.04949	-0.263	-0.14697
676	0.64086	-0.04418	-0.26261	-0.10414
674	0.61936	-0.01267	-0.31207	-0.08445
672	0.50874	-0.01276	-0.33755	-0.08276
670	0.42429	0.08014	-0.3537	-0.04528
668	0.31753	0.03952	-0.3503	-0.02739
666	0.27226	0.07522	-0.32978	-0.0269
664	0.24976	0.09247	-0.3075	0.03509
662	0.2456	0.1104	-0.28386	0.03151
660	0.2909	0.11305	-0.26226	0.05331
658	0.32934	0.00971	-0.22271	0.0171
656	0.41229	-0.06578	-0.21667	-0.00598
654	0.47188	-0.09318	-0.26644	-0.03198
652	0.46371	-0.09066	-0.29599	-0.07687
650	0.44948	-0.00482	-0.29702	-0.05882
648	0.43595	0.01256	-0.29339	-0.0883
646	0.38478	0.04652	-0.28071	-0.11417
644	0.37405	0.0901	-0.29901	-0.07936
642	0.32701	0.11111	-0.27025	-0.04815
640	0.30708	0.11524	-0.25902	-0.01347
638	0.32367	0.04414	-0.27519	-0.01226
636	0.35505	0.03102	-0.29704	-0.01654
634	0.35366	0.00837	-0.32315	-0.01503
632	0.38033	0.01008	-0.33254	-0.02788
630	0.35995	0.05826	-0.32375	-0.04255
628	0.31714	0.0703	-0.3162	-0.06861
626	0.25691	0.10224	-0.28284	-0.07392
624	0.24867	0.08436	-0.29237	-0.09085
622	0.21543	0.07681	-0.27969	-0.07105
620	0.24177	0.12466	-0.27698	-0.06856
618	0.25476	0.07933	-0.30742	-0.02576
616	0.29206	0.01609	-0.28675	-0.0099
614	0.2802	-0.09172	-0.26766	0.01471
612	0.30605	-0.08619	-0.28101	0.00565
610	0.28198	-0.07612	-0.28502	-0.01689
608	0.26896	-0.09386	-0.27855	0.00202
606	0.24296	-0.07077	-0.26113	-0.02695
604	0.24696	-0.02944	-0.28008	-0.05322
602	0.22965	0.05326	-0.26461	-0.06414
600	0.2578	0.14137	-0.24817	-0.06922
598	0.26727	0.09313	-0.24802	-0.05477
596	0.27077	0.05233	-0.24036	-0.04828
594	0.22888	-0.0044	-0.24334	-0.03802
592	0.19775	-0.0724	-0.27276	-0.06702
590	0.17912	-0.12642	-0.30872	-0.06796
588	0.14264	-0.14229	-0.31782	-0.10531
586	0.09277	-0.11669	-0.33805	-0.12307
584	0.10405	-0.01595	-0.35497	-0.13715
582	0.11035	0.01962	-0.33671	-0.11863
580	0.14706	0.00757	-0.30715	-0.10105
578	0.18313	-0.0586	-0.28288	-0.03949
576	0.17886	-0.09366	-0.27459	0.00662
574	0.18901	-0.18888	-0.26021	0.02988
572	0.23786	-0.25446	-0.26076	0.05671
570	0.26586	-0.25102	-0.29481	0.06328
568	0.2168	-0.23651	-0.264	0.03197
566	0.2271	-0.19445	-0.3213	-0.01938
564	0.26238	-0.18778	-0.32496	-0.05204
562	0.26378	-0.15166	-0.30407	-0.05708
560	0.21205	-0.18799	-0.31419	-0.0999
558	0.1986	-0.24919	-0.29111	-0.05687
556	0.12467	-0.24685	-0.2525	-0.02984
554	0.13108	-0.23085	-0.2291	-0.07396
552	0.11836	-0.11792	-0.23896	-0.06139
550	0.1353	-0.01312	-0.23075	-0.07253
548	0.12965	0.02237	-0.2279	-0.06858
546	0.16916	0.09551	-0.27946	-0.12328
544	0.21695	0.16351	-0.22094	-0.08222
542	0.27055	0.36944	-0.17852	-0.0879
540	0.34825	0.55645	-0.07143	-0.03559
538	0.50216	0.93308	0.10885	0.23254
536	0.73936	1.59998	0.30457	0.61459
534	1.09086	2.47595	0.58105	1.07318
532	1.57848	3.53758	0.83195	1.7067
530	2.11513	4.67431	1.06214	2.45024
528	2.538	5.60626	1.18237	3.05154
526	2.83718	6.28853	1.26238	3.36209
524	2.96494	6.66047	1.24459	3.35351
522	2.89915	6.61113	1.16791	2.86993
520	2.74842	6.17294	1.07311	2.21627
518	2.50572	5.57456	0.90797	1.47998
516	2.21307	4.87061	0.7248	0.76424
514	1.95392	4.20475	0.64091	0.15002
512	1.78045	3.63223	0.48603	-0.2556
510	1.55142	3.16368	0.34414	-0.4089
508	1.31391	2.7084	0.24896	-0.47875
506	1.12784	2.25548	0.14424	-0.42773
504	0.96674	1.91567	0.06392	-0.37143
502	0.83271	1.56454	0.05401	-0.3791
500	0.77937	1.30561	0.02756	-0.27722
498	0.71251	1.08818	0.0135	-0.18661
496	0.62082	0.84708	-0.01291	-0.11863
494	0.54696	0.70623	-0.03983	-0.09362
492	0.45619	0.54996	-0.09119	-0.14543
490	0.37761	0.38179	-0.13033	-0.19151
488	0.30759	0.27394	-0.1359	-0.20325
486	0.28171	0.13191	-0.19954	-0.18118
484	0.28213	0.11054	-0.19698	-0.16634
482	0.27351	0.10208	-0.15245	-0.12615
480	0.27257	0.13085	-0.14403	-0.09165
478	0.27775	0.1085	-0.15017	-0.06788
476	0.25481	0.10969	-0.14015	-0.07051
474	0.23467	0.15971	-0.1214	-0.01272
472	0.23205	0.17928	-0.11892	-0.03551
470	0.24921	0.2026	-0.10015	-0.06025
468	0.25988	0.20938	-0.11946	-0.07215
466	0.24311	0.19974	-0.13658	-0.07171
464	0.24228	0.20341	-0.15061	-0.03721
462	0.20056	0.20592	-0.13935	0.01306
460	0.18821	0.158	-0.15166	-0.01148
458	0.16032	0.11347	-0.16565	-0.01927
456	0.13192	0.0907	-0.17295	-0.01878
454	0.10713	0.10504	-0.17577	0.02289
452	0.10238	0.10187	-0.18061	-0.00217
450	0.09235	0.07765	-0.17756	-0.0587
448	0.10143	0.04752	-0.16027	-0.08721
446	0.1074	0.03814	-0.13537	-0.08212
444	0.15923	0.06112	-0.15757	-0.06196
442	0.15257	0.08949	-0.14774	-0.06126
440	0.20436	0.07922	-0.12895	-0.03882
438	0.23305	0.04682	-0.1699	-0.05589
436	0.22876	0.06494	-0.23402	-0.04498
434	0.19164	0.05712	-0.26201	0.0053
432	0.20403	0.02056	-0.25232	-0.01537
430	0.20526	-0.01122	-0.25291	-0.05702
428	0.17111	-0.06998	-0.18105	-0.06615
426	0.14873	-0.10751	-0.12807	-0.06757
424	0.16584	-0.06272	-0.05197	-0.07853
422	0.1717	-0.11835	0.02437	-0.06669
420	0.21407	-0.11446	0.06098	-0.05348
418	0.21901	-0.1335	0.02233	-0.08357
416	0.18773	-0.09438	-0.01219	-0.07531
414	0.14958	-0.12559	-0.0328	-0.0572
412	0.19285	-0.17705	-0.02793	-0.06228
410	0.22881	-0.17878	-0.05878	-0.06449
408	0.23323	-0.16126	-0.04142	-0.02564
406	0.28073	-0.08547	-0.0055	-0.02119
404	0.38189	0.01803	0.02061	-0.03858
402	0.4493	0.01973	-0.0102	-0.04608
400	0.44365	0.07435	-0.00788	-0.05294
398	0.4549	0.12234	-0.02272	-0.02931
396	0.40343	0.16339	-0.03247	-0.00544
394	0.32347	0.17009	-0.03784	0.00155
392	0.28612	0.13154	0.01687	0.000371935
390	0.25408	0.15104	0.02186	0.00351
388	0.24172	0.19511	0.07371	0.04799
386	0.30516	0.27925	0.11085	-0.0053
384	0.3639	0.30938	0.09116	-0.0376
382	0.39687	0.27468	0.039	-0.06904
380	0.41991	0.2924	-0.00065324	-0.04488
378	0.46091	0.31626	-0.01991	-0.0273
376	0.45748	0.35665	-0.00528	-0.00315
374	0.44465	0.35036	0.01399	-0.04562
372	0.43792	0.2749	0.07395	-0.05514
370	0.45972	0.1942	0.07169	-0.04194
368	0.42181	0.12691	0.15374	-0.03695
366	0.41672	0.04688	0.17154	-0.08063
364	0.33223	-0.09055	0.1616	-0.06868
362	0.26712	-0.25038	0.12845	-0.07481
360	0.16869	-0.43709	0.04046	-0.1024
358	0.03469	-0.69414	0.00959	-0.14687
356	-0.09324	-0.96915	-0.07156	-0.22212
354	-0.28457	-1.25786	-0.15337	-0.35436
352	-0.38797	-1.57975	-0.23507	-0.44953
350	-0.55214	-1.85584	-0.31208	-0.5154
348	-0.69548	-2.04798	-0.31815	-0.55346
346	-0.75067	-2.14844	-0.33116	-0.56944
344	-0.8364	-2.21786	-0.27307	-0.5662
342	-0.81896	-2.19996	-0.27401	-0.57186
340	-0.8661	-2.1807	-0.23452	-0.62438
338	-0.81212	-2.16635	-0.17376	-0.67637
336	-0.75851	-2.131	-0.17754	-0.69499
334	-0.72147	-2.01803	-0.11371	-0.74537
332	-0.64256	-1.86725	-0.0816	-0.71254
330	-0.6232	-1.69113	-0.06366	-0.59639
328	-0.48396	-1.43116	0.00104	-0.4571
326	-0.33592	-1.15769	0.08966	-0.29739
324	-0.22052	-0.87531	0.15428	-0.15264
322	-0.08566	-0.58099	0.18796	-0.06843
320	0.02037	-0.36837	0.26744	0.0035
318	0.13448	-0.1115	0.32096	0.01984
316	0.21328	0.02373	0.36598	0.0975
314	0.26775	0.20869	0.41091	0.15577
312	0.30415	0.38604	0.47958	0.21631
310	0.36938	0.62124	0.52946	0.20116
308	0.46017	0.82553	0.64672	0.24857
306	0.56668	1.03596	0.79355	0.29871
304	0.68891	1.25255	0.96997	0.35158
302	0.82687	1.47528	1.17597	0.40717
300	0.98054	1.70416	1.41155	0.46549

## Sheet: Figure 2h
	2nt (low)	2nt (middle)	2nt (high)	2nt with T30
Wavelength (nm)	CD (mdeg)	CD (mdeg)	CD (mdeg)	CD (mdeg)
700	0.000993497	-0.12218	-0.00182	-0.35139
698	0.000376671	-0.02163	0.000267091	-0.28464
696	0.000800615	0.06222	0.00359	-0.23172
694	0.00227	0.12937	0.00816	-0.19263
692	0.00477	0.17981	0.01396	-0.16736
690	0.00832	0.21356	0.02101	-0.15591
688	0.02354	0.20916	0.04789	-0.16803
686	0.0297	0.15577	0.06958	-0.19115
684	0.07785	0.15942	0.01904	-0.20515
682	0.09464	0.19368	-0.00343	-0.26184
680	0.0937	0.12534	0.00789	-0.27754
678	0.04395	0.17502	0.06256	-0.27228
676	0.02152	0.19973	0.06956	-0.26042
674	-0.05759	0.12278	0.04132	-0.25645
672	-0.10952	0.04722	0.05387	-0.23585
670	-0.07095	-0.04396	0.04204	-0.23301
668	-0.10367	-0.04173	0.06589	-0.21697
666	-0.08249	-0.00891	0.0574	-0.23301
664	0.01961	0.02738	0.02448	-0.23332
662	0.04799	0.08668	0.01574	-0.27309
660	0.11228	0.11185	0.06166	-0.25519
658	0.13316	0.16662	0.09624	-0.25253
656	0.15803	0.1698	0.08593	-0.25857
654	0.15517	0.18504	0.08179	-0.25386
652	0.17586	0.12245	0.06397	-0.22283
650	0.15601	0.05272	0.02943	-0.22762
648	0.12761	0.05857	0.04073	-0.22302
646	0.09266	0.09875	0.03251	-0.25906
644	0.10867	0.11866	0.07786	-0.23295
642	0.04931	0.14825	0.07449	-0.24743
640	0.03575	0.11388	0.07068	-0.26549
638	0.08792	0.12481	0.08813	-0.267
636	0.07106	0.18996	0.1474	-0.28775
634	0.10992	0.25159	0.16662	-0.25543
632	0.15962	0.25478	0.1935	-0.24286
630	0.16265	0.20242	0.1866	-0.24041
628	0.15939	0.2298	0.14584	-0.22179
626	0.15024	0.18809	0.16522	-0.20836
624	0.16352	0.17752	0.20626	-0.15689
622	0.15972	0.14586	0.19669	-0.14434
620	0.18856	0.10713	0.20924	-0.17875
618	0.2887	0.12042	0.18887	-0.19476
616	0.30736	0.14633	0.2373	-0.22939
614	0.32954	0.11677	0.24059	-0.23902
612	0.36571	0.14703	0.23253	-0.27496
610	0.38518	0.16384	0.18484	-0.29087
608	0.35798	0.20911	0.10989	-0.26506
606	0.35041	0.20498	0.15912	-0.26327
604	0.31882	0.2518	0.19498	-0.24559
602	0.28902	0.27504	0.22602	-0.22593
600	0.27225	0.26066	0.24577	-0.19914
598	0.2603	0.21809	0.24451	-0.21564
596	0.26841	0.22223	0.26089	-0.214
594	0.21128	0.14609	0.25122	-0.25997
592	0.20859	0.14991	0.24513	-0.2747
590	0.22284	0.14671	0.22841	-0.29966
588	0.17618	0.17622	0.2439	-0.28037
586	0.19813	0.18442	0.32599	-0.26135
584	0.21527	0.17216	0.32525	-0.23046
582	0.26936	0.18313	0.3266	-0.17565
580	0.32208	0.20942	0.36793	-0.14431
578	0.38678	0.2105	0.41178	-0.16351
576	0.45526	0.26418	0.34247	-0.12434
574	0.44628	0.17481	0.38779	-0.18398
572	0.48806	0.12465	0.42529	-0.24068
570	0.47681	0.15051	0.48008	-0.29062
568	0.44912	0.14542	0.56015	-0.32108
566	0.48568	0.06114	0.61754	-0.36052
564	0.52696	0.00926	0.64457	-0.39282
562	0.56686	0.01895	0.6973	-0.35961
560	0.56846	0.15296	0.78077	-0.38481
558	0.63175	0.27722	0.83367	-0.3477
556	0.66836	0.39275	0.83638	-0.28939
554	0.72011	0.46035	1.0046	-0.28944
552	0.73289	0.54162	1.10607	-0.25894
550	0.66758	0.67372	1.24913	-0.21703
548	0.73423	0.63987	1.40871	-0.23876
546	0.79818	0.64345	1.61215	-0.23681
544	0.90658	0.73879	1.88523	-0.17071
542	1.01703	0.9017	2.25185	-0.08968
540	1.18881	1.18427	2.77437	-0.03522
538	1.47903	1.50579	3.49532	0.05556
536	1.79934	1.96716	4.48478	0.14295
534	2.12022	2.53389	5.71341	0.23541
532	2.44052	3.10054	7.00251	0.29787
530	2.77412	3.73145	8.33741	0.44456
528	3.19321	4.22711	9.69249	0.53613
526	3.55491	4.79172	10.9073	0.60315
524	3.83706	5.25876	11.8211	0.6508
522	4.07249	5.58262	12.4471	0.62638
520	4.28065	5.7113	12.7145	0.59998
518	4.3362	5.67104	12.6045	0.51082
516	4.25476	5.53389	12.2054	0.42899
514	4.01224	5.21104	11.423	0.32621
512	3.69791	4.7549	10.343	0.31129
510	3.33657	4.23575	9.09754	0.3964
508	2.94963	3.58191	7.79297	0.34577
506	2.50296	3.04091	6.49813	0.24606
504	2.07623	2.5282	5.25411	0.19275
502	1.78131	2.01677	4.21232	0.15819
500	1.50749	1.58964	3.37862	0.10338
498	1.29044	1.26211	2.73257	-0.02565
496	1.10088	1.04794	2.34367	-0.09925
494	0.93186	0.88791	2.01974	-0.0815
492	0.85989	0.74065	1.74419	-0.02158
490	0.79013	0.61005	1.52677	-0.0018
488	0.7391	0.50147	1.30797	-0.06435
486	0.60157	0.44236	1.06125	-0.11025
484	0.53946	0.32929	0.79416	-0.10054
482	0.49051	0.22381	0.58816	-0.09399
480	0.43033	0.15885	0.41141	-0.12744
478	0.44637	0.10143	0.28239	-0.20401
476	0.42815	0.12384	0.24738	-0.23752
474	0.45348	0.19592	0.19224	-0.21853
472	0.50713	0.22434	0.1834	-0.2772
470	0.51402	0.24149	0.20807	-0.32526
468	0.56215	0.32842	0.23314	-0.33993
466	0.4801	0.33924	0.22992	-0.32729
464	0.42442	0.32244	0.21924	-0.30361
462	0.32938	0.36882	0.22632	-0.31006
460	0.30639	0.30283	0.21196	-0.28738
458	0.30324	0.30748	0.19117	-0.27138
456	0.29583	0.29799	0.21663	-0.25988
454	0.30933	0.33042	0.19377	-0.29054
452	0.34864	0.33162	0.21847	-0.32211
450	0.35895	0.31783	0.20585	-0.32315
448	0.34389	0.36836	0.18296	-0.23527
446	0.29085	0.31187	0.1413	-0.22658
444	0.28686	0.32767	0.16232	-0.21558
442	0.21964	0.3054	0.16685	-0.2413
440	0.23813	0.24219	0.16387	-0.23166
438	0.22632	0.23942	0.17994	-0.23083
436	0.20094	0.1607	0.21629	-0.24647
434	0.18577	0.14691	0.23444	-0.29813
432	0.18613	0.11763	0.23911	-0.27848
430	0.14823	0.11571	0.23087	-0.2657
428	0.14332	0.12627	0.19498	-0.23193
426	0.20792	0.12242	0.13736	-0.23908
424	0.24748	0.11835	0.16852	-0.21625
422	0.22108	0.13427	0.14834	-0.21842
420	0.24026	0.20088	0.18268	-0.23324
418	0.22179	0.21698	0.21779	-0.25329
416	0.17219	0.22254	0.26155	-0.28031
414	0.13612	0.23248	0.30196	-0.32823
412	0.11401	0.23456	0.32866	-0.29902
410	0.14106	0.23395	0.34954	-0.30113
408	0.1612	0.23968	0.33822	-0.28884
406	0.15466	0.24248	0.34042	-0.24156
404	0.20617	0.24233	0.36177	-0.18418
402	0.21792	0.23924	0.42304	-0.19918
400	0.26289	0.23322	0.53677	-0.17724

## Sheet: Figure 2i
	With T30	Low surface concentration	High surface concentration
Site (nt)	g-factor	g-factor	g-factor
14	0.29	0.48	2
7	0.52	1.07	2.22
2	0.35	1.33	3.99

## Sheet: Figure 2j
Surface concentration, ρ	Enhancement factor	Internal ratio
4.41	1.12
11.89	2.42	3.74
18.2	3.72	5.62
22.66	7.07	7.61
29.59	5.98	4.24

## Sheet: Figure 3b
	D1	D2	D3	D4	D5
Wavelength (nm)	CD (mdeg)	CD (mdeg)	CD (mdeg)	CD (mdeg)	CD (mdeg)
700	-0.14395	0.07725	-0.12995	-0.07018	0.46119
698	0.00839	0.02271	-0.05257	0.04596	0.33504
696	0.05046	0.05555	-0.05167	0.08247	0.3288
694	0.0596	0.04181	-0.05909	0.10007	0.26872
692	0.01707	0.06852	-0.08486	0.10707	0.24275
690	-0.00383	0.05293	-0.14352	0.09385	0.2331
688	-0.03591	0.03798	-0.14271	0.11071	0.24436
686	-0.07996	0.02619	-0.12233	0.07694	0.2407
684	-0.07427	0.01745	-0.11179	0.07371	0.21473
682	-0.03655	0.0291	-0.09438	0.06799	0.24955
680	-0.03104	0.03861	-0.10289	0.03346	0.22286
678	0.000698	0.03827	-0.14529	-0.02466	0.18552
676	0.03985	0.0619	-0.13817	-0.01106	0.20362
674	0.08172	0.0579	-0.10321	0.00623	0.26713
672	0.08248	0.07153	-0.03278	0.02596	0.28881
670	0.11574	0.07169	-0.00139	0.04487	0.31035
668	0.06724	0.03574	0.01669	0.0429	0.28992
666	0.06302	0.00459	0.03444	0.04848	0.26682
664	0.04384	0.01554	0.01802	0.02831	0.24496
662	0.05319	0.01301	-0.02951	0.02899	0.22491
660	0.03304	-0.00156	-0.01018	0.08841	0.26229
658	0.0555	0.01451	0.04252	0.16215	0.33293
656	0.03052	0.05637	-0.02354	0.12614	0.30121
654	0.04747	0.06266	-0.0177	0.14994	0.29991
652	0.02764	0.0704	-0.01487	0.11922	0.27745
650	0.05713	0.09843	-0.00677	0.10516	0.28549
648	0.07969	0.14977	-0.05137	0.07617	0.2277
646	0.05045	0.08822	0.0095	0.13386	0.25163
644	0.0068	0.09507	-0.01807	0.12235	0.25457
642	-0.01145	0.07652	-0.01463	0.11345	0.23604
640	-0.04548	0.09455	-0.03812	0.09467	0.20481
638	-0.01894	0.06145	-0.04385	0.0857	0.20553
636	0.03756	0.12748	-0.14444	0.01779	0.12848
634	0.06489	0.11451	-0.1609	0.01226	0.09862
632	0.09088	0.1219	-0.18495	0.000854	0.09782
630	0.09604	0.07138	-0.20428	0.00248	0.04157
628	0.06738	0.07414	-0.19745	0.00602	0.05109
626	0.01338	0.02124	-0.14684	0.03417	0.11084
624	-0.00239	0.03425	-0.14997	0.02717	0.11309
622	0.00164	0.04401	-0.15254	0.01708	0.10454
620	-0.02783	0.0687	-0.11348	0.02737	0.17682
618	-0.05397	0.07452	-0.09728	0.02988	0.17773
616	-0.02852	0.07859	-0.09125	0.03993	0.17089
614	-0.0462	0.05374	-0.06696	0.07596	0.15995
612	-0.0347	0.02784	-0.02985	0.12304	0.17071
610	-0.06976	-0.03553	-0.04686	0.10248	0.15467
608	-0.06124	-0.01638	-0.06591	0.11741	0.15448
606	-0.09188	-0.02789	-0.05017	0.13349	0.18296
604	-0.07202	-0.00937	-0.03036	0.1167	0.19457
602	-0.12508	-0.04035	-0.03331	0.11734	0.18514
600	-0.08328	4.8e-05	0.00851	0.15972	0.19238
598	-0.07637	-0.01946	0.02713	0.1724	0.20747
596	-0.07013	-0.00299	0.00444	0.16243	0.20382
594	-0.10695	-0.03132	0.000888	0.14995	0.21271
592	-0.08587	-0.00855	-0.02505	0.13771	0.19189
590	-0.08928	0.01086	-0.07291	0.10786	0.16803
588	-0.11015	-0.02488	-0.11618	0.06561	0.10821
586	-0.0997	-0.03448	-0.07509	0.0583	0.08895
584	-0.06555	-0.01727	-0.05377	0.08247	0.07196
582	-0.09627	-0.02882	-0.05919	0.06604	0.09295
580	-0.11844	-0.07167	-0.06419	0.04011	0.08877
578	-0.11539	-0.0292	-0.02597	0.04573	0.12523
576	-0.09007	-0.02102	-0.01297	0.04025	0.12568
574	-0.10298	-0.05701	-0.02401	0.02263	0.10111
572	-0.11107	-0.0429	-0.00845	0.03175	0.12035
570	-0.11042	-0.03885	0.00498	0.03083	0.12362
568	-0.11443	-0.04647	0.01387	0.04977	0.12622
566	-0.13787	-0.05234	-0.00828	0.07352	0.1225
564	-0.15539	-0.03151	-0.025	0.07354	0.13085
562	-0.10564	-0.02955	-0.04164	0.08333	0.09616
560	-0.10499	0.00216	-0.04375	0.07254	0.07046
558	-0.09785	-0.01097	-0.08413	0.01726	0.0462
556	-0.10667	-0.00976	-0.07222	-0.000742	0.05073
554	-0.10407	0.02918	-0.08062	-0.000752	0.0706
552	-0.12782	0.03664	-0.0636	0.01212	0.07184
550	-0.12895	0.06805	-0.0143	0.0613	0.11783
548	-0.15289	0.11105	0.07967	0.15008	0.13738
546	-0.17614	0.17357	0.16795	0.23351	0.17018
544	-0.15543	0.25351	0.31403	0.39975	0.24967
542	-0.16368	0.4081	0.55699	0.6205	0.36754
540	-0.17371	0.60232	0.86558	0.96165	0.51668
538	-0.13785	0.89243	1.29037	1.46389	0.77671
536	-0.08529	1.36353	1.88419	2.16921	1.11323
534	-0.07092	1.94612	2.64357	3.04958	1.5854
532	0.00264	2.60638	3.46663	4.11019	2.20419
530	0.11638	3.41919	4.34309	5.29088	3.00454
528	0.25249	4.25279	5.19987	6.49803	3.91752
526	0.43326	5.03263	5.92562	7.62315	4.95467
524	0.69524	5.7982	6.56337	8.56703	5.96903
522	1.00356	6.47435	7.04363	9.29763	6.93644
520	1.37089	6.99744	7.33553	9.74721	7.66767
518	1.83407	7.38038	7.41701	9.91727	8.14267
516	2.35014	7.51799	7.34294	9.7779	8.27322
514	2.95428	7.37521	6.99653	9.37296	8.07651
512	3.55903	6.97133	6.43407	8.66933	7.53854
510	4.15879	6.35883	5.75829	7.74148	6.80823
508	4.61037	5.58719	5.01635	6.62671	5.91471
506	4.89533	4.73331	4.19249	5.42823	4.9109
504	4.97078	3.91121	3.39302	4.24243	3.94232
502	4.80512	3.2118	2.68759	3.16313	3.02899
500	4.46666	2.58964	2.05301	2.28008	2.21883
498	4.03042	2.0937	1.56752	1.60694	1.59484
496	3.5585	1.72451	1.2126	1.14213	1.13593
494	3.09804	1.46321	0.93144	0.78026	0.79032
492	2.67667	1.23878	0.7374	0.57697	0.59961
490	2.32755	1.06689	0.54605	0.35265	0.44586
488	2.04062	0.93912	0.30913	0.12769	0.2836
486	1.82834	0.80541	0.05008	-0.11891	0.15533
484	1.61469	0.6675	-0.13486	-0.28419	0.07082
482	1.4952	0.58563	-0.32541	-0.46153	-0.04248
480	1.39487	0.49296	-0.44004	-0.57448	-0.08726
478	1.29704	0.40168	-0.4945	-0.60651	-0.08829
476	1.19975	0.37895	-0.47125	-0.55111	-0.0547
474	1.11205	0.347	-0.43361	-0.49512	-0.02941
472	1.018	0.30441	-0.39225	-0.45233	0.00623
470	0.9221	0.29969	-0.31808	-0.3627	0.02103
468	0.81868	0.27428	-0.27788	-0.31253	0.02418
466	0.6989	0.23247	-0.24564	-0.28711	0.00507
464	0.56928	0.21083	-0.21103	-0.24983	-0.0024
462	0.46121	0.16677	-0.16273	-0.18931	0.0084
460	0.34697	0.12248	-0.17525	-0.19818	-0.03683
458	0.26122	0.10232	-0.12894	-0.17656	-0.03669
456	0.17898	0.08291	-0.11778	-0.14719	-0.02858
454	0.14041	0.07125	-0.10966	-0.14235	-0.03263
452	0.07626	0.07366	-0.09863	-0.13424	-0.05058
450	0.03887	0.05998	-0.08849	-0.12414	-0.04237
448	-0.00481	0.03753	-0.09332	-0.12129	-0.05964
446	-0.04868	0.02157	-0.08018	-0.12583	-0.07532
444	-0.06672	0.00561	-0.08318	-0.14047	-0.08365
442	-0.0899	-0.0253	-0.08175	-0.16309	-0.06474
440	-0.11991	-0.03112	-0.06686	-0.1544	-0.04627
438	-0.13837	-0.04107	-0.09123	-0.18196	-0.06355
436	-0.14591	-0.05517	-0.10803	-0.1974	-0.08194
434	-0.1713	-0.04806	-0.12775	-0.20765	-0.11175
432	-0.19569	-0.05461	-0.15113	-0.22141	-0.15465
430	-0.24928	-0.08505	-0.15476	-0.22875	-0.15581
428	-0.26662	-0.08471	-0.14663	-0.22632	-0.16377
426	-0.28993	-0.08999	-0.15911	-0.24018	-0.16239
424	-0.33392	-0.13996	-0.14639	-0.26894	-0.15959
422	-0.32886	-0.13432	-0.15389	-0.27612	-0.14345
420	-0.33599	-0.13023	-0.17909	-0.27225	-0.15816
418	-0.38485	-0.11978	-0.18284	-0.27251	-0.15031
416	-0.38979	-0.11161	-0.18466	-0.28147	-0.15042
414	-0.40311	-0.1089	-0.21748	-0.25356	-0.15489
412	-0.42765	-0.11131	-0.21863	-0.23655	-0.15451
410	-0.42545	-0.10941	-0.19184	-0.23781	-0.12851
408	-0.39133	-0.10844	-0.18587	-0.22836	-0.11547
406	-0.37827	-0.0974	-0.15167	-0.20506	-0.10184
404	-0.35419	-0.09722	-0.12112	-0.17758	-0.07444
402	-0.3471	-0.08639	-0.09894	-0.15637	-0.04921
400	-0.29911	-0.06524	-0.10409	-0.14387	-0.05557
398	-0.3151	-0.06688	-0.08085	-0.10119	-0.00696
396	-0.32484	-0.05675	-0.0704	-0.07304	0.03695
394	-0.33754	-0.01114	-0.0495	-0.06608	0.05264
392	-0.30311	0.02686	-0.03894	-0.06963	0.04766
390	-0.30077	0.0573	-0.01274	-0.03289	0.10345
388	-0.27311	0.07789	-0.01592	-0.05783	0.11362
386	-0.26068	0.08965	-0.01254	-0.05061	0.11284
384	-0.21535	0.11262	0.01121	-0.03469	0.12941
382	-0.23718	0.11133	0.05051	0.0093	0.18213
380	-0.22278	0.11981	0.05091	0.01345	0.16294
378	-0.19432	0.15018	0.06421	0.04023	0.13421
376	-0.18048	0.14662	0.08264	0.04817	0.13547
374	-0.19013	0.13782	0.05874	0.03206	0.12897
372	-0.18374	0.12105	0.01014	-0.02391	0.07134
370	-0.22581	0.10751	0.01044	-0.05825	0.07024
368	-0.28724	0.04417	-0.04449	-0.11083	0.03828
366	-0.33011	0.01576	-0.14805	-0.2048	-0.04467
364	-0.43212	-0.10139	-0.23649	-0.32904	-0.15014
362	-0.54245	-0.22555	-0.37017	-0.51042	-0.30355
360	-0.6776	-0.43632	-0.57373	-0.76	-0.53154
358	-0.87492	-0.68249	-0.81691	-1.10374	-0.81265
356	-1.09805	-0.96552	-1.08194	-1.49419	-1.13142
354	-1.35357	-1.25763	-1.38512	-1.91236	-1.50362
352	-1.66112	-1.57552	-1.69494	-2.33192	-1.84631
350	-1.98087	-1.84916	-1.99617	-2.73812	-2.22452
348	-2.28203	-2.07981	-2.20627	-3.05589	-2.52543
346	-2.58569	-2.30557	-2.33088	-3.26882	-2.73664
344	-2.81968	-2.43371	-2.4339	-3.43218	-2.90331
342	-2.98681	-2.52539	-2.4605	-3.49576	-2.99981
340	-3.13984	-2.59335	-2.44597	-3.50198	-3.01801
338	-3.21364	-2.62553	-2.43845	-3.47791	-3.02895
336	-3.2656	-2.60461	-2.46369	-3.47086	-3.05314
334	-3.27353	-2.57574	-2.40509	-3.39467	-2.981
332	-3.27356	-2.52481	-2.33909	-3.28648	-2.92022
330	-3.17102	-2.37623	-2.20138	-3.10025	-2.77952
328	-3.07652	-2.19604	-2.02464	-2.8585	-2.5665
326	-2.93066	-2.03772	-1.79239	-2.56873	-2.31072
324	-2.76893	-1.85955	-1.60367	-2.27663	-2.05751
322	-2.60248	-1.67	-1.36757	-1.95387	-1.7778
320	-2.43445	-1.54307	-1.19095	-1.71776	-1.53342
318	-2.28287	-1.43246	-1.03206	-1.46847	-1.28292
316	-2.12215	-1.27783	-0.88094	-1.24374	-1.05016
314	-1.97389	-1.14123	-0.74833	-1.02878	-0.86187
312	-1.79183	-0.98178	-0.64029	-0.87188	-0.70667
310	-1.68425	-0.82891	-0.55502	-0.69481	-0.53015
308	-1.51825	-0.71173	-0.46383	-0.531	-0.38607
306	-1.40198	-0.61414	-0.40956	-0.37497	-0.23273
304	-1.23946	-0.43771	-0.31856	-0.19229	-0.03224
302	-1.09204	-0.35081	-0.25014	0.00779	0.17791
300	-0.84342	0.02346	-0.11792	0.24953	0.42796

## Sheet: Figure 3c
Dimer	λabsorption (nm)	Internal ratio
D1	500.5	1.65
D2	501	3.05
D3	505	3.12
D4	503.5	2.85
D5	503	2.75

## Sheet: Figure 3d
Time (ps) Wavelength (nm)	-11.4383	-10.4383	-9.43833	-8.43833	-7.43833	-6.43833	-5.43833	-4.43833	-3.43833	-2.43833	-1.43833	-1.39833	-1.35833	-1.31833	-1.27833	-1.23833	-1.19833	-1.15833	-1.11833	-1.07833	-1.03833	-0.998329	-0.958329	-0.918329	-0.878329	-0.838329	-0.798329	-0.758329	-0.718329	-0.678329	-0.638329	-0.598329	-0.558329	-0.518329	-0.478329	-0.438329	-0.398329	-0.358329	-0.318329	-0.278329	-0.238329	-0.198329	-0.158329	-0.118329	-0.078329	-0.038329	0.00167102	0.041671	0.081671
324.675	0	0	-7.1185e-05	-8.42068e-05	2.77071e-05	-1.98482e-05	9.41071e-06	-3.21645e-05	-0.000102405	-4.18544e-05	4.86108e-05	5.51417e-05	6.16726e-05	6.82035e-05	7.47344e-05	8.12653e-05	8.77962e-05	9.43271e-05	0.000100858	0.000107389	0.00011392	0.000120451	0.000126982	0.000133512	0.000144215	0.00016605	0.000187884	0.000209719	0.000231553	0.000253388	0.000275222	0.000297057	0.000318891	0.000340726	0.00036256	0.000384395	0.000406229	0.000428064	0.000449898	0.000471733	0.000493567	0.000515402	0.000537236	0.000559071	0.000580905	0.00060274	0.000624574	0.000646408	0.000668243
325.31	0	0	-0.000169311	-0.000198813	4.20741e-06	0.000115964	2.47012e-05	-2.91796e-05	-9.2938e-05	-7.76544e-05	9.02572e-06	1.41414e-05	1.92571e-05	2.43728e-05	2.94885e-05	3.46042e-05	3.97199e-05	4.48356e-05	4.99514e-05	5.50671e-05	6.01828e-05	6.52985e-05	7.04142e-05	7.55299e-05	0.000105842	0.000157457	0.000209072	0.000260687	0.000312302	0.000363917	0.000415532	0.000467147	0.000518762	0.000570377	0.000621992	0.000673607	0.000725223	0.000776838	0.000828453	0.000880068	0.000931683	0.000983298	0.00103	0.00109	0.00114	0.00119	0.00124	0.00129	0.00134
325.945	0	0	-0.00014764	-0.000113413	7.73836e-05	-2.94919e-06	-4.74589e-05	2.36122e-05	3.08918e-05	9.69024e-05	9.16859e-05	8.60609e-05	8.04359e-05	7.48109e-05	6.91859e-05	6.35609e-05	5.79359e-05	5.23109e-05	4.66859e-05	4.10609e-05	3.54359e-05	2.98109e-05	2.41859e-05	1.85609e-05	5.68904e-05	0.000105625	0.000154359	0.000203094	0.000251828	0.000300563	0.000349297	0.000398031	0.000446766	0.0004955	0.000544235	0.000592969	0.000641704	0.000690438	0.000739172	0.000787907	0.000836641	0.000885376	0.00093411	0.000982845	0.00103	0.00108	0.00113	0.00118	0.00123
326.58	0	0	-5.46681e-05	-2.04717e-05	-1.0966e-05	-6.10917e-05	7.9032e-06	-1.89464e-05	-7.11429e-05	6.84496e-05	0.0001278	0.000125536	0.000123271	0.000121007	0.000118742	0.000116478	0.000114213	0.000111949	0.000109684	0.00010742	0.000105155	0.000102891	0.000100626	0.000100979	0.000134642	0.000168305	0.000201968	0.000235631	0.000269295	0.000302958	0.000336621	0.000370284	0.000403948	0.000437611	0.000471274	0.000504937	0.0005386	0.000572264	0.000605927	0.00063959	0.000673253	0.000706916	0.00074058	0.000774243	0.000807906	0.000841569	0.000875233	0.000908896	0.001
327.215	0	0	-5.95466e-06	-0.000107307	-8.62341e-05	-5.39004e-05	3.68412e-05	7.74804e-05	-2.1883e-05	-2.29903e-05	7.80666e-05	8.05882e-05	8.31099e-05	8.56315e-05	8.81531e-05	9.06747e-05	9.31963e-05	9.57179e-05	9.82395e-05	0.000100761	0.000103283	0.000105804	0.000108326	0.000117132	0.000138434	0.000159737	0.000181039	0.000202341	0.000223644	0.000244946	0.000266248	0.00028755	0.000308853	0.000330155	0.000351457	0.00037276	0.000394062	0.000415364	0.000436666	0.000457969	0.000479271	0.000500573	0.000521876	0.000543178	0.00056448	0.000585782	0.000607085	0.000628387	0.000965787
327.85	0	0	-6.78738e-05	-0.000116374	-2.76045e-05	-4.07132e-05	-4.8625e-05	3.72949e-05	5.44118e-05	4.44261e-05	1.47816e-05	1.43962e-05	1.40109e-05	1.36255e-05	1.32401e-05	1.28547e-05	1.24693e-05	1.20839e-05	1.16985e-05	1.13131e-05	1.09277e-05	1.05424e-05	1.0157e-05	2.15079e-05	4.08803e-05	6.02526e-05	7.96249e-05	9.89972e-05	0.00011837	0.000137742	0.000157114	0.000176487	0.000195859	0.000215231	0.000234603	0.000253976	0.000273348	0.00029272	0.000312093	0.000331465	0.000350837	0.00037021	0.000389582	0.000408954	0.000428327	0.000447699	0.000467071	0.000486444	0.00106
328.486	0	0	-1.62546e-05	-7.14272e-05	-2.5644e-05	-7.21263e-05	8.94904e-06	2.29259e-05	2.49094e-05	-1.34299e-05	-7.70751e-05	-7.2655e-05	-6.82349e-05	-6.38148e-05	-5.93947e-05	-5.49746e-05	-5.05545e-05	-4.61344e-05	-4.17143e-05	-3.72942e-05	-3.28741e-05	-2.8454e-05	-2.40339e-05	-1.75935e-05	-1.07993e-05	-4.00519e-06	2.78896e-06	9.5831e-06	1.63773e-05	2.31714e-05	2.99655e-05	3.67597e-05	4.35538e-05	5.0348e-05	5.71421e-05	6.39363e-05	7.07304e-05	7.75246e-05	8.43187e-05	9.11129e-05	9.7907e-05	0.000104701	0.000111495	0.000118289	0.000125084	0.000131878	0.000138672	0.000145466	0.00112
329.121	0	0	-8.09972e-05	-9.57738e-05	1.05593e-05	-3.49058e-05	-2.83032e-05	6.59327e-06	6.9915e-06	6.54501e-05	8.8413e-05	8.70336e-05	8.56542e-05	8.42748e-05	8.28954e-05	8.1516e-05	8.01365e-05	7.87571e-05	7.73777e-05	7.59983e-05	7.46189e-05	7.32395e-05	7.14975e-05	6.66863e-05	6.18751e-05	5.70639e-05	5.22527e-05	4.74415e-05	4.26303e-05	3.78191e-05	3.30079e-05	2.81966e-05	2.33854e-05	1.85742e-05	1.3763e-05	8.95181e-06	4.14059e-06	-6.70616e-07	-5.48183e-06	-1.0293e-05	-1.51042e-05	-1.99155e-05	-2.47267e-05	-2.95379e-05	-3.43491e-05	-3.91603e-05	-4.39715e-05	5.74941e-05	0.00104
329.757	0	0	-5.04442e-05	-0.000125175	3.21333e-05	2.76019e-05	-5.77266e-05	-2.83667e-06	3.82149e-05	2.92995e-05	4.32726e-05	4.54743e-05	4.76761e-05	4.98779e-05	5.20796e-05	5.42814e-05	5.64831e-05	5.86849e-05	6.08867e-05	6.30884e-05	6.52902e-05	6.74919e-05	6.51539e-05	5.46734e-05	4.41928e-05	3.37123e-05	2.32318e-05	1.27513e-05	2.27078e-06	-8.20974e-06	-1.86903e-05	-2.91708e-05	-3.96513e-05	-5.01318e-05	-6.06123e-05	-7.10928e-05	-8.15733e-05	-9.20539e-05	-0.000102534	-0.000113015	-0.000123495	-0.000133976	-0.000144456	-0.000154937	-0.000165417	-0.000175898	-0.000186378	0.000109239	0.00103
330.392	0	0	-9.46824e-05	-0.000107674	-4.18049e-05	-6.20132e-05	2.66827e-05	0.000105948	7.57978e-05	1.97101e-05	4.9172e-05	5.45993e-05	6.00266e-05	6.5454e-05	7.08813e-05	7.63086e-05	8.17359e-05	8.71633e-05	9.25906e-05	9.80179e-05	0.000103445	0.000108873	0.000102294	8.79736e-05	7.36537e-05	5.93337e-05	4.50138e-05	3.06938e-05	1.63738e-05	2.05388e-06	-1.22661e-05	-2.6586e-05	-4.0906e-05	-5.5226e-05	-6.95459e-05	-8.38659e-05	-9.81858e-05	-0.000112506	-0.000126826	-0.000141146	-0.000155466	-0.000169786	-0.000184106	-0.000198426	-0.000212745	-0.000227065	-0.000241385	0.000149277	0.00108
331.028	0	0	-2.81775e-05	-7.27033e-05	-4.20755e-05	-5.01218e-05	-2.81998e-05	-1.97812e-05	3.6315e-06	-3.06515e-05	1.1616e-05	1.90081e-05	2.64001e-05	3.37922e-05	4.11843e-05	4.85763e-05	5.59684e-05	6.33605e-05	7.07526e-05	7.81446e-05	8.55367e-05	9.29288e-05	7.91379e-05	6.17769e-05	4.44158e-05	2.70547e-05	9.69358e-06	-7.66751e-06	-2.50286e-05	-4.23897e-05	-5.97508e-05	-7.71119e-05	-9.4473e-05	-0.000111834	-0.000129195	-0.000146556	-0.000163917	-0.000181278	-0.00019864	-0.000216001	-0.000233362	-0.000250723	-0.000268084	-0.000285445	-0.000302806	-0.000320167	-0.000337528	7.01234e-05	0.00105
331.663	0	0	6.20358e-06	6.76731e-05	-1.9262e-05	-6.78643e-05	-1.50127e-05	-1.15951e-05	-4.78278e-05	7.97065e-06	8.09245e-05	8.24012e-05	8.38779e-05	8.53545e-05	8.68312e-05	8.83079e-05	8.97846e-05	9.12612e-05	9.27379e-05	9.42146e-05	9.56912e-05	9.49253e-05	7.42645e-05	5.36036e-05	3.29428e-05	1.2282e-05	-8.37889e-06	-2.90397e-05	-4.97006e-05	-7.03614e-05	-9.10223e-05	-0.000111683	-0.000132344	-0.000153005	-0.000173666	-0.000194326	-0.000214987	-0.000235648	-0.000256309	-0.00027697	-0.000297631	-0.000318292	-0.000338952	-0.000359613	-0.000380274	-0.000400935	-0.000377233	9.38054e-05	0.00107
332.299	0	0	-4.26044e-05	-3.1464e-05	-5.94905e-05	-8.19381e-05	3.78136e-05	9.20686e-05	4.31652e-05	-2.57612e-06	3.82578e-05	4.25646e-05	4.68713e-05	5.11781e-05	5.54848e-05	5.97916e-05	6.40983e-05	6.8405e-05	7.27118e-05	7.70185e-05	8.13253e-05	7.67103e-05	5.51297e-05	3.35491e-05	1.19685e-05	-9.61212e-06	-3.11927e-05	-5.27733e-05	-7.43539e-05	-9.59345e-05	-0.000117515	-0.000139096	-0.000160676	-0.000182257	-0.000203838	-0.000225418	-0.000246999	-0.000268579	-0.00029016	-0.000311741	-0.000333321	-0.000354902	-0.000376482	-0.000398063	-0.000419644	-0.000441224	-0.000388792	3.18474e-05	0.00105
332.935	0	0	-1.28727e-06	-2.90207e-05	-5.0697e-05	-2.18981e-05	-4.08105e-05	1.00624e-05	3.2277e-05	-1.50988e-07	6.55089e-05	7.04804e-05	7.54518e-05	8.04233e-05	8.53948e-05	9.03663e-05	9.53378e-05	0.000100309	0.000105281	0.000110252	0.000115224	0.000105393	8.50953e-05	6.47978e-05	4.45004e-05	2.42029e-05	3.9055e-06	-1.6392e-05	-3.66894e-05	-5.69869e-05	-7.72843e-05	-9.75818e-05	-0.000117879	-0.000138177	-0.000158474	-0.000178772	-0.000199069	-0.000219366	-0.000239664	-0.000259961	-0.000280259	-0.000300556	-0.000320854	-0.000341151	-0.000361449	-0.000381746	-0.000309405	9.83143e-05	0.00109
333.57	0	0	-1.61505e-05	-4.77015e-05	1.4086e-05	6.87011e-06	8.59995e-07	1.05525e-05	5.93052e-05	2.95103e-05	-4.36096e-05	-4.53689e-05	-4.71283e-05	-4.88877e-05	-5.06471e-05	-5.24065e-05	-5.41659e-05	-5.59252e-05	-5.76846e-05	-5.9444e-05	-6.12034e-05	-7.23239e-05	-8.54328e-05	-9.85416e-05	-0.00011165	-0.000124759	-0.000137868	-0.000150977	-0.000164086	-0.000177195	-0.000190303	-0.000203412	-0.000216521	-0.00022963	-0.000242739	-0.000255848	-0.000268956	-0.000282065	-0.000295174	-0.000308283	-0.000321392	-0.000334501	-0.00034761	-0.000360718	-0.000373827	-0.000386936	-0.000364324	8.40446e-05	0.00113
334.206	0	0	-2.12417e-05	-3.89019e-05	-6.77538e-05	-3.21704e-05	6.92885e-05	3.48674e-05	1.23283e-05	1.57497e-05	1.44075e-05	1.49887e-05	1.55698e-05	1.61509e-05	1.6732e-05	1.73131e-05	1.78942e-05	1.84753e-05	1.90565e-05	1.96376e-05	1.91053e-05	1.64269e-06	-1.58199e-05	-3.32825e-05	-5.07451e-05	-6.82077e-05	-8.56703e-05	-0.000103133	-0.000120595	-0.000138058	-0.000155521	-0.000172983	-0.000190446	-0.000207908	-0.000225371	-0.000242834	-0.000260296	-0.000277759	-0.000295221	-0.000312684	-0.000330147	-0.000347609	-0.000365072	-0.000382534	-0.000399997	-0.000419671	-0.000445819	-1.60591e-05	0.00109
334.842	0	0	-2.84163e-05	-7.13102e-06	5.69999e-05	2.88456e-05	-5.64996e-06	1.08284e-05	2.9327e-05	-5.94473e-05	-4.01577e-05	-3.50438e-05	-2.99299e-05	-2.4816e-05	-1.97021e-05	-1.45882e-05	-9.47425e-06	-4.36034e-06	7.53568e-07	5.86748e-06	6.11786e-06	-5.17017e-06	-1.64582e-05	-2.77462e-05	-3.90343e-05	-5.03223e-05	-6.16103e-05	-7.28984e-05	-8.41864e-05	-9.54744e-05	-0.000106762	-0.00011805	-0.000129339	-0.000140627	-0.000151915	-0.000163203	-0.000174491	-0.000185779	-0.000197067	-0.000208355	-0.000219643	-0.000230931	-0.000242219	-0.000253507	-0.000264795	-0.000334031	-0.000399157	4.77839e-05	0.00111
335.478	0	0	-1.88967e-05	-2.60192e-05	-1.34573e-06	-4.15458e-05	-2.8361e-05	-1.51442e-06	3.97748e-05	4.78223e-05	-8.88679e-07	-3.41608e-06	-5.94347e-06	-8.47087e-06	-1.09983e-05	-1.35257e-05	-1.60531e-05	-1.85805e-05	-2.11079e-05	-2.36353e-05	-2.99511e-05	-3.96365e-05	-4.93218e-05	-5.90072e-05	-6.86926e-05	-7.8378e-05	-8.80633e-05	-9.77487e-05	-0.000107434	-0.000117119	-0.000126805	-0.00013649	-0.000146176	-0.000155861	-0.000165546	-0.000175232	-0.000184917	-0.000194602	-0.000204288	-0.000213973	-0.000223659	-0.000233344	-0.000243029	-0.000252715	-0.0002624	-0.000371724	-0.000414672	5.54726e-05	0.00116
336.114	0	0	6.61161e-07	-7.12653e-05	-5.17129e-05	-1.28924e-05	5.65006e-06	3.48815e-05	2.06794e-05	3.293e-05	1.94203e-05	1.75224e-05	1.56244e-05	1.37265e-05	1.18285e-05	9.93061e-06	8.03266e-06	6.13472e-06	4.23678e-06	2.33883e-06	-3.999e-06	-1.17391e-05	-1.94792e-05	-2.72193e-05	-3.49594e-05	-4.26995e-05	-5.04396e-05	-5.81798e-05	-6.59199e-05	-7.366e-05	-8.14001e-05	-8.91402e-05	-9.68803e-05	-0.00010462	-0.000112361	-0.000120101	-0.000127841	-0.000135581	-0.000143321	-0.000151061	-0.000158801	-0.000166541	-0.000174281	-0.000182021	-0.000189762	-0.000414899	-0.000499525	-3.55607e-05	0.00119
336.75	0	0	4.24964e-05	-1.84764e-06	-2.51318e-05	-6.57552e-06	-8.76095e-06	-7.03341e-06	4.99751e-06	-4.42498e-05	-1.58713e-05	-1.22457e-05	-8.62009e-06	-4.99449e-06	-1.36889e-06	2.25671e-06	5.8823e-06	9.5079e-06	1.31335e-05	1.67591e-05	8.70069e-06	5.08297e-07	-7.6841e-06	-1.58765e-05	-2.40689e-05	-3.22613e-05	-4.04537e-05	-4.86461e-05	-5.68385e-05	-6.50309e-05	-7.32233e-05	-8.14157e-05	-8.96081e-05	-9.78005e-05	-0.000105993	-0.000114185	-0.000122378	-0.00013057	-0.000138762	-0.000146955	-0.000155147	-0.00016334	-0.000171532	-0.000179724	-0.000187917	-0.000377515	-0.000501726	1.68861e-05	0.00106
337.387	0	0	1.76914e-05	4.91117e-06	-1.63911e-05	-3.00854e-05	1.43787e-05	1.47265e-05	-6.60759e-05	-2.95072e-05	2.62166e-05	2.71902e-05	2.81637e-05	2.91372e-05	3.01107e-05	3.10842e-05	3.20577e-05	3.30312e-05	3.40047e-05	3.32482e-05	2.61892e-05	1.91301e-05	1.20711e-05	5.01204e-06	-2.04701e-06	-9.10606e-06	-1.61651e-05	-2.32242e-05	-3.02832e-05	-3.73423e-05	-4.44013e-05	-5.14604e-05	-5.85194e-05	-6.55785e-05	-7.26375e-05	-7.96966e-05	-8.67556e-05	-9.38147e-05	-0.000100874	-0.000107933	-0.000114992	-0.000122051	-0.00012911	-0.000136169	-0.000199911	-0.000429388	-0.000454526	-7.51704e-05	0.00117
338.023	0	0	4.32096e-06	-0.000104442	-5.16117e-05	4.25459e-06	3.9538e-05	3.38942e-05	3.20155e-05	-2.00923e-05	2.95763e-06	6.16486e-06	9.37209e-06	1.25793e-05	1.57866e-05	1.89938e-05	2.2201e-05	2.54082e-05	2.86155e-05	2.77483e-05	2.16982e-05	1.56481e-05	9.59806e-06	3.54797e-06	-2.50212e-06	-8.55221e-06	-1.46023e-05	-2.06524e-05	-2.67025e-05	-3.27526e-05	-3.88027e-05	-4.48527e-05	-5.09028e-05	-5.69529e-05	-6.3003e-05	-6.90531e-05	-7.51032e-05	-8.11533e-05	-8.72034e-05	-9.32535e-05	-9.93036e-05	-0.000105354	-0.000111404	-0.000117454	-0.000162553	-0.000312209	-0.000431695	-4.54641e-05	0.00121
338.659	0	0	-5.87944e-05	-5.01647e-06	4.27283e-05	3.36953e-05	4.83341e-05	-2.46884e-05	2.03921e-06	-2.53871e-05	-1.07726e-05	-8.04155e-06	-5.31052e-06	-2.5795e-06	1.51518e-07	2.88254e-06	5.61356e-06	8.34458e-06	1.10756e-05	9.82906e-06	6.56016e-06	3.29127e-06	2.23761e-08	-3.24652e-06	-6.51541e-06	-9.78431e-06	-1.30532e-05	-1.63221e-05	-1.9591e-05	-2.28599e-05	-2.61288e-05	-2.93977e-05	-3.26666e-05	-3.59355e-05	-3.92043e-05	-4.24732e-05	-4.57421e-05	-4.9011e-05	-5.22799e-05	-5.55488e-05	-5.88177e-05	-6.20866e-05	-6.53555e-05	-6.86244e-05	-0.000209268	-0.000459536	-0.000536062	-0.000113274	0.00125
339.296	0	0	-6.9815e-05	-6.38043e-05	-2.30576e-06	-2.85347e-05	1.84377e-05	1.06657e-06	3.6508e-05	4.85026e-05	5.06285e-05	5.12339e-05	5.18393e-05	5.24448e-05	5.30502e-05	5.36556e-05	5.4261e-05	5.48664e-05	5.54719e-05	4.90637e-05	4.17337e-05	3.44037e-05	2.70737e-05	1.97437e-05	1.24137e-05	5.08365e-06	-2.24635e-06	-9.57636e-06	-1.69064e-05	-2.42364e-05	-3.15664e-05	-3.88964e-05	-4.62264e-05	-5.35564e-05	-6.08864e-05	-6.82164e-05	-7.55464e-05	-8.28764e-05	-9.02064e-05	-9.75364e-05	-0.000104866	-0.000112196	-0.000119526	-0.000126856	-0.000107456	-0.000399341	-0.000517123	-0.000109986	0.00126
339.932	0	0	-5.28339e-06	-3.51666e-06	2.32033e-05	1.72341e-05	1.42175e-05	-2.96865e-05	8.27905e-07	-3.74243e-05	1.48996e-06	5.44296e-06	9.39597e-06	1.3349e-05	1.7302e-05	2.1255e-05	2.5208e-05	2.9161e-05	3.26725e-05	3.23331e-05	3.19937e-05	3.16543e-05	3.13149e-05	3.09755e-05	3.06361e-05	3.02967e-05	2.99573e-05	2.96178e-05	2.92784e-05	2.8939e-05	2.85996e-05	2.82602e-05	2.79208e-05	2.75814e-05	2.7242e-05	2.69026e-05	2.65631e-05	2.62237e-05	2.58843e-05	2.55449e-05	2.52055e-05	2.48661e-05	2.45267e-05	8.3026e-06	-0.00015677	-0.000403459	-0.00053462	-0.000157876	0.00123
340.569	0	0	-7.6233e-05	-2.49384e-05	2.59922e-06	1.44086e-05	9.42041e-05	2.11146e-05	-1.90334e-05	3.25142e-06	2.19762e-05	2.25666e-05	2.31569e-05	2.37473e-05	2.43376e-05	2.4928e-05	2.55183e-05	2.61087e-05	2.53245e-05	2.16192e-05	1.7914e-05	1.42088e-05	1.05036e-05	6.79833e-06	3.0931e-06	-6.12133e-07	-4.31736e-06	-8.02259e-06	-1.17278e-05	-1.54331e-05	-1.91383e-05	-2.28435e-05	-2.65487e-05	-3.0254e-05	-3.39592e-05	-3.76644e-05	-4.13697e-05	-4.50749e-05	-4.87801e-05	-5.24853e-05	-5.61906e-05	-5.98958e-05	-6.3601e-05	-9.03988e-05	-0.000199957	-0.000399475	-0.000521861	-7.36383e-05	0.00121
341.205	0	0	2.85996e-05	-3.34995e-05	-2.94059e-05	-3.76912e-05	1.55465e-05	7.84197e-06	-5.94132e-07	-1.37818e-05	6.46243e-05	6.94837e-05	7.43431e-05	7.92025e-05	8.4062e-05	8.89214e-05	9.37808e-05	9.86402e-05	9.89477e-05	9.53035e-05	9.16593e-05	8.80151e-05	8.43709e-05	8.07266e-05	7.70824e-05	7.34382e-05	6.9794e-05	6.61498e-05	6.25056e-05	5.88613e-05	5.52171e-05	5.15729e-05	4.79287e-05	4.42845e-05	4.06403e-05	3.6996e-05	3.33518e-05	2.97076e-05	2.60634e-05	2.24192e-05	1.87749e-05	1.51307e-05	1.14865e-05	-2.05412e-06	-0.00011841	-0.000354878	-0.000483981	-4.9111e-06	0.00126
341.842	0	0	-2.5327e-05	-5.85601e-05	-4.64146e-05	2.34388e-05	2.90061e-05	7.79591e-05	4.9177e-05	-4.50877e-05	4.4409e-07	4.69093e-06	8.93778e-06	1.31846e-05	1.74315e-05	2.16783e-05	2.59252e-05	3.0172e-05	3.12268e-05	3.12106e-05	3.11943e-05	3.11781e-05	3.11618e-05	3.11456e-05	3.11293e-05	3.11131e-05	3.10968e-05	3.10806e-05	3.10644e-05	3.10481e-05	3.10319e-05	3.10156e-05	3.09994e-05	3.09831e-05	3.09669e-05	3.09506e-05	3.09344e-05	3.09182e-05	3.09019e-05	3.08857e-05	3.08694e-05	3.08532e-05	3.08369e-05	-2.89514e-05	-0.000123585	-0.000366978	-0.000570386	-4.55809e-05	0.00124
342.478	0	0	-5.37881e-05	-4.23486e-05	-6.16477e-06	-1.86972e-05	4.45579e-05	2.31546e-05	4.77217e-05	-3.09662e-06	-2.07214e-06	-5.30269e-07	1.0116e-06	2.55347e-06	4.09534e-06	5.63721e-06	7.17908e-06	8.72095e-06	1.0728e-05	1.27541e-05	1.47803e-05	1.68064e-05	1.88326e-05	2.08587e-05	2.28849e-05	2.4911e-05	2.69372e-05	2.89633e-05	3.09895e-05	3.30157e-05	3.50418e-05	3.7068e-05	3.90941e-05	4.11203e-05	4.31464e-05	4.51726e-05	4.71987e-05	4.92249e-05	5.1251e-05	5.32772e-05	5.53034e-05	5.73295e-05	5.93557e-05	-2.32843e-05	-0.000140746	-0.000327344	-0.000505187	-0.000166728	0.00112
343.115	0	0	3.19362e-06	-4.54101e-05	-1.84354e-05	-1.73558e-05	-2.83483e-05	-1.00342e-05	3.02533e-05	3.70695e-05	3.48621e-05	3.48538e-05	3.48455e-05	3.48372e-05	3.48288e-05	3.48205e-05	3.48122e-05	3.45027e-05	3.27265e-05	3.09504e-05	2.91742e-05	2.7398e-05	2.56219e-05	2.38457e-05	2.20695e-05	2.02934e-05	1.85172e-05	1.67411e-05	1.49649e-05	1.31887e-05	1.14126e-05	9.6364e-06	7.86023e-06	6.08407e-06	4.30791e-06	2.53174e-06	7.55578e-07	-1.02059e-06	-2.79675e-06	-4.57291e-06	-6.34908e-06	-8.12524e-06	-1.42924e-05	-3.89083e-05	-0.000109744	-0.000436665	-0.000527264	-0.000198274	0.00113
343.752	0	0	2.26703e-05	-3.73658e-05	7.61218e-06	-1.59033e-05	-9.01301e-06	3.49435e-05	2.34161e-05	-7.62472e-05	-7.92325e-06	-2.42386e-06	3.07554e-06	8.57493e-06	1.40743e-05	1.95737e-05	2.50731e-05	2.78405e-05	2.61221e-05	2.44037e-05	2.26853e-05	2.09669e-05	1.92485e-05	1.75301e-05	1.58117e-05	1.40933e-05	1.23749e-05	1.06565e-05	8.93805e-06	7.21965e-06	5.50125e-06	3.78284e-06	2.06444e-06	3.4603e-07	-1.37237e-06	-3.09078e-06	-4.80918e-06	-6.52759e-06	-8.24599e-06	-9.9644e-06	-1.16828e-05	-1.34012e-05	2.18034e-05	1.68275e-05	-0.000176944	-0.000437147	-0.000573917	-0.000147211	0.00112
344.389	0	0	-2.1103e-05	-3.91972e-05	-1.13091e-05	-1.73239e-05	2.36143e-05	4.28697e-05	4.92829e-05	-4.71104e-05	-8.80585e-06	-4.92062e-06	-1.03538e-06	2.84985e-06	6.73508e-06	1.06203e-05	1.45056e-05	1.56082e-05	1.47362e-05	1.38643e-05	1.29923e-05	1.21204e-05	1.12484e-05	1.03764e-05	9.50446e-06	8.6325e-06	7.76053e-06	6.88857e-06	6.01661e-06	5.14464e-06	4.27268e-06	3.40071e-06	2.52875e-06	1.65679e-06	7.84821e-07	-8.7143e-08	-9.59107e-07	-1.83107e-06	-2.70304e-06	-3.575e-06	-4.44696e-06	-5.31893e-06	2.83013e-05	1.85285e-05	-0.000172376	-0.000466217	-0.000562722	-0.000114543	0.00126
345.026	0	0	-1.8732e-05	-7.65808e-05	1.27265e-05	8.82352e-06	5.37014e-05	-6.78372e-06	-3.03639e-05	-2.08375e-05	3.78935e-05	4.08672e-05	4.38409e-05	4.68146e-05	4.97883e-05	5.2762e-05	5.57357e-05	5.26292e-05	4.79027e-05	4.31762e-05	3.84497e-05	3.37233e-05	2.89968e-05	2.42703e-05	1.95438e-05	1.48173e-05	1.00909e-05	5.36438e-06	6.37902e-07	-4.08858e-06	-8.81506e-06	-1.35415e-05	-1.8268e-05	-2.29945e-05	-2.7721e-05	-3.24475e-05	-3.71739e-05	-4.19004e-05	-4.66269e-05	-5.13534e-05	-5.60798e-05	-6.08063e-05	-2.83593e-05	-2.37201e-05	-0.000152999	-0.000471865	-0.00058836	-0.000244126	0.00119
345.663	0	0	7.6308e-07	-5.29944e-05	-3.3357e-05	1.81122e-05	4.11811e-05	-1.14564e-05	4.13117e-05	-3.30839e-06	1.3962e-05	1.59857e-05	1.80094e-05	2.00332e-05	2.20569e-05	2.40806e-05	2.61043e-05	2.35686e-05	2.0999e-05	1.84295e-05	1.58599e-05	1.32904e-05	1.07208e-05	8.15124e-06	5.58168e-06	3.01212e-06	4.4256e-07	-2.127e-06	-4.69656e-06	-7.26612e-06	-9.83568e-06	-1.24052e-05	-1.49748e-05	-1.75444e-05	-2.01139e-05	-2.26835e-05	-2.5253e-05	-2.78226e-05	-3.03921e-05	-3.29617e-05	-3.55313e-05	-3.81008e-05	-5.58499e-05	-4.40731e-05	-0.000121812	-0.000468096	-0.000599473	-0.000372758	0.00118
346.3	0	0	2.69662e-05	-3.13556e-05	-2.24522e-05	-4.14071e-05	-1.22268e-07	8.88922e-06	2.92718e-05	-3.54571e-05	1.97791e-05	2.37827e-05	2.77863e-05	3.17898e-05	3.57934e-05	3.9797e-05	4.26243e-05	4.05643e-05	3.85043e-05	3.64443e-05	3.43843e-05	3.23244e-05	3.02644e-05	2.82044e-05	2.61444e-05	2.40844e-05	2.20244e-05	1.99644e-05	1.79044e-05	1.58444e-05	1.37844e-05	1.17244e-05	9.66443e-06	7.60443e-06	5.54444e-06	3.48445e-06	1.42445e-06	-6.3554e-07	-2.69553e-06	-4.75553e-06	-6.81552e-06	-6.89811e-06	1.17339e-07	-2.17113e-05	-0.000176093	-0.000445407	-0.000579101	-0.00024111	0.00115
346.937	0	0	9.30923e-06	-1.45376e-05	-5.28736e-05	-3.62988e-05	4.06012e-05	3.89762e-05	-1.5765e-05	-2.14959e-05	8.61633e-06	1.00455e-05	1.14747e-05	1.29038e-05	1.4333e-05	1.57622e-05	1.67152e-05	1.69347e-05	1.71543e-05	1.73739e-05	1.75935e-05	1.78131e-05	1.80326e-05	1.82522e-05	1.84718e-05	1.86914e-05	1.8911e-05	1.91305e-05	1.93501e-05	1.95697e-05	1.97893e-05	2.00089e-05	2.02284e-05	2.0448e-05	2.06676e-05	2.08872e-05	2.11068e-05	2.13263e-05	2.15459e-05	2.17655e-05	2.19851e-05	1.88676e-05	2.38077e-05	1.88975e-05	-8.61198e-05	-0.000359268	-0.000622069	-0.000223932	0.0012
347.574	0	0	-6.46196e-06	-4.00082e-05	-2.43479e-05	-4.14398e-06	8.15442e-05	4.01996e-06	2.96623e-05	-4.35776e-05	2.02161e-05	2.47116e-05	2.9207e-05	3.37025e-05	3.81979e-05	4.26934e-05	4.41475e-05	4.35031e-05	4.28587e-05	4.22143e-05	4.157e-05	4.09256e-05	4.02812e-05	3.96368e-05	3.89925e-05	3.83481e-05	3.77037e-05	3.70594e-05	3.6415e-05	3.57706e-05	3.51262e-05	3.44819e-05	3.38375e-05	3.31931e-05	3.25487e-05	3.19044e-05	3.126e-05	3.06156e-05	2.99713e-05	2.93269e-05	2.86825e-05	5.21888e-05	4.5234e-05	2.45524e-06	-0.000184274	-0.000428968	-0.000655189	-0.000269314	0.00125
348.212	0	0	1.44067e-05	-9.91905e-05	-2.56762e-05	-3.00327e-05	6.95591e-05	8.26846e-06	5.60401e-06	-1.29618e-05	1.20022e-05	1.35843e-05	1.51664e-05	1.67485e-05	1.83306e-05	1.99127e-05	1.94988e-05	1.85485e-05	1.75981e-05	1.66477e-05	1.56973e-05	1.4747e-05	1.37966e-05	1.28462e-05	1.18959e-05	1.09455e-05	9.99511e-06	9.04474e-06	8.09436e-06	7.14399e-06	6.19362e-06	5.24324e-06	4.29287e-06	3.3425e-06	2.39212e-06	1.44175e-06	4.91375e-07	-4.58998e-07	-1.40937e-06	-2.35975e-06	-3.31012e-06	-2.7427e-05	-5.82751e-06	-2.66161e-05	-0.000155286	-0.000450677	-0.000705088	-0.000242081	0.00124
348.849	0	0	-4.86579e-05	-4.7382e-05	-2.47363e-05	-3.32344e-05	9.05485e-05	1.05191e-05	4.52281e-05	-2.76191e-05	4.98787e-06	7.73295e-06	1.0478e-05	1.32231e-05	1.59682e-05	1.87133e-05	1.5608e-05	1.24016e-05	9.19525e-06	5.98886e-06	2.78246e-06	-4.23927e-07	-3.63032e-06	-6.83671e-06	-1.00431e-05	-1.32495e-05	-1.64559e-05	-1.96623e-05	-2.28687e-05	-2.60751e-05	-2.92815e-05	-3.24878e-05	-3.56942e-05	-3.89006e-05	-4.2107e-05	-4.53134e-05	-4.85198e-05	-5.17262e-05	-5.49326e-05	-5.8139e-05	-6.13454e-05	3.25682e-05	-3.50459e-05	-4.06989e-06	-0.000100948	-0.000437856	-0.000734159	-0.000393328	0.00124
349.486	0	0	-3.69587e-05	-4.53188e-05	-1.5239e-05	-3.65466e-05	2.25042e-05	-4.06375e-06	4.46404e-05	-5.87456e-05	5.14075e-05	5.82588e-05	6.511e-05	7.19612e-05	7.88124e-05	8.38824e-05	8.0629e-05	7.73756e-05	7.41222e-05	7.08687e-05	6.76153e-05	6.43619e-05	6.11085e-05	5.78551e-05	5.46017e-05	5.13482e-05	4.80948e-05	4.48414e-05	4.1588e-05	3.83346e-05	3.50811e-05	3.18277e-05	2.85743e-05	2.53209e-05	2.20675e-05	1.88141e-05	1.55606e-05	1.23072e-05	9.05381e-06	5.80039e-06	-3.96716e-06	-2.83452e-05	7.85104e-06	-2.73373e-05	-0.000148569	-0.000478911	-0.000694462	-0.000231557	0.00119
350.124	0	0	-4.93351e-05	-6.37423e-06	-5.55571e-05	1.38493e-05	5.08937e-05	-8.41815e-06	2.77112e-05	-2.78517e-05	3.62455e-05	4.01412e-05	4.40369e-05	4.79326e-05	5.18283e-05	5.33829e-05	5.09165e-05	4.84501e-05	4.59837e-05	4.35173e-05	4.10508e-05	3.85844e-05	3.6118e-05	3.36516e-05	3.11852e-05	2.87188e-05	2.62524e-05	2.3786e-05	2.13196e-05	1.88532e-05	1.63868e-05	1.39204e-05	1.1454e-05	8.98761e-06	6.5212e-06	4.0548e-06	1.5884e-06	-8.78008e-07	-3.34441e-06	-5.81081e-06	5.76943e-06	1.81729e-05	1.16578e-05	2.0131e-05	-0.000109957	-0.000448668	-0.000658522	-0.000195512	0.00128
350.761	0	0	-3.71597e-05	-5.44864e-05	-9.26837e-06	-1.64025e-05	7.17913e-05	-1.61505e-05	6.14489e-05	-5.02686e-05	8.69542e-06	1.29668e-05	1.72382e-05	2.15096e-05	2.57809e-05	2.60416e-05	2.31274e-05	2.02131e-05	1.72989e-05	1.43846e-05	1.14704e-05	8.55613e-06	5.64189e-06	2.72764e-06	-1.86601e-07	-3.10085e-06	-6.01509e-06	-8.92933e-06	-1.18436e-05	-1.47578e-05	-1.76721e-05	-2.05863e-05	-2.35006e-05	-2.64148e-05	-2.9329e-05	-3.22433e-05	-3.51575e-05	-3.80718e-05	-4.0986e-05	-4.39003e-05	-1.49056e-05	-1.16825e-05	7.26864e-06	-3.05927e-05	-0.000162042	-0.000492519	-0.000698533	-0.000235908	0.00127
351.399	0	0	2.2536e-06	-6.10277e-05	-4.05151e-05	-4.3958e-06	7.61921e-05	-1.26971e-05	4.85113e-05	-8.13288e-05	2.47769e-05	3.13414e-05	3.7906e-05	4.44705e-05	5.10351e-05	5.15189e-05	4.99412e-05	4.83635e-05	4.67857e-05	4.5208e-05	4.36302e-05	4.20525e-05	4.04747e-05	3.8897e-05	3.73192e-05	3.57415e-05	3.41638e-05	3.2586e-05	3.10083e-05	2.94305e-05	2.78528e-05	2.6275e-05	2.46973e-05	2.31195e-05	2.15418e-05	1.99641e-05	1.83863e-05	1.68086e-05	1.52308e-05	1.36531e-05	-4.38034e-06	-4.54625e-05	-2.42237e-05	6.49877e-05	-0.000100207	-0.000467703	-0.000636303	-0.000261395	0.00133
352.037	0	0	-2.42216e-05	-1.8671e-05	-1.34058e-05	1.42622e-05	3.572e-05	-2.54422e-05	2.06919e-05	-7.9328e-05	1.59717e-05	2.15578e-05	2.71439e-05	3.27299e-05	3.8316e-05	3.65271e-05	3.42166e-05	3.19062e-05	2.95958e-05	2.72853e-05	2.49749e-05	2.26644e-05	2.0354e-05	1.80435e-05	1.57331e-05	1.34226e-05	1.11122e-05	8.80175e-06	6.4913e-06	4.18085e-06	1.87041e-06	-4.40036e-07	-2.75048e-06	-5.06093e-06	-7.37137e-06	-9.68182e-06	-1.19923e-05	-1.43027e-05	-1.66132e-05	-1.89236e-05	-1.17609e-05	-1.46502e-05	1.87453e-05	1.68021e-06	-0.00015913	-0.000475561	-0.000708752	-0.000408317	0.00132
352.674	0	0	-6.21899e-05	1.50682e-05	-5.80449e-05	2.3285e-08	7.1372e-05	-1.92635e-05	3.33159e-05	-4.76355e-05	1.62191e-05	2.00606e-05	2.39021e-05	2.77437e-05	3.04988e-05	2.52575e-05	2.00161e-05	1.47747e-05	9.53336e-06	4.292e-06	-9.4937e-07	-6.19073e-06	-1.14321e-05	-1.66735e-05	-2.19148e-05	-2.71562e-05	-3.23976e-05	-3.76389e-05	-4.28803e-05	-4.81217e-05	-5.3363e-05	-5.86044e-05	-6.38458e-05	-6.90871e-05	-7.43285e-05	-7.95698e-05	-8.48112e-05	-9.00526e-05	-9.52939e-05	-8.51751e-05	1.81401e-05	-1.86685e-05	-4.48043e-06	2.60177e-05	-0.000156737	-0.000477213	-0.000665413	-0.000362452	0.00125
353.312	0	0	-4.57314e-05	-4.5043e-05	-9.05808e-06	-1.28599e-05	5.4739e-05	9.1323e-06	-1.17132e-06	-2.72136e-05	5.16068e-05	5.55183e-05	5.94298e-05	6.33412e-05	6.50966e-05	6.19108e-05	5.8725e-05	5.55391e-05	5.23533e-05	4.91675e-05	4.59817e-05	4.27958e-05	3.961e-05	3.64242e-05	3.32383e-05	3.00525e-05	2.68667e-05	2.36808e-05	2.0495e-05	1.73092e-05	1.41234e-05	1.09375e-05	7.7517e-06	4.56587e-06	1.38004e-06	-1.80579e-06	-4.99162e-06	-8.17745e-06	-1.13633e-05	5.20371e-06	4.79746e-05	4.77677e-05	4.13586e-05	6.73741e-06	-0.000148969	-0.000489707	-0.000645369	-0.000228582	0.00126
353.95	0	0	-2.73651e-05	-4.57797e-05	7.17831e-06	-6.49221e-06	7.70722e-05	-5.87486e-05	4.56776e-05	-2.78789e-05	4.27768e-05	4.67855e-05	5.07942e-05	5.48028e-05	5.63816e-05	5.53958e-05	5.441e-05	5.34242e-05	5.24385e-05	5.14527e-05	5.04669e-05	4.94812e-05	4.84954e-05	4.75096e-05	4.65239e-05	4.55381e-05	4.45523e-05	4.35665e-05	4.25808e-05	4.1595e-05	4.06092e-05	3.96235e-05	3.86377e-05	3.76519e-05	3.66661e-05	3.56804e-05	3.46946e-05	3.37088e-05	3.27231e-05	1.16554e-05	-1.81193e-05	9.71748e-06	4.62383e-05	1.70402e-05	-0.000154585	-0.000425998	-0.000638643	-0.000211561	0.00131
354.588	0	0	-5.81862e-05	-4.17275e-05	-4.7394e-05	-2.94564e-05	7.21335e-05	-9.24312e-06	2.76983e-05	4.70847e-07	5.99019e-05	6.28945e-05	6.58871e-05	6.88797e-05	6.83058e-05	6.59579e-05	6.361e-05	6.12622e-05	5.89143e-05	5.65664e-05	5.42185e-05	5.18707e-05	4.95228e-05	4.71749e-05	4.4827e-05	4.24792e-05	4.01313e-05	3.77834e-05	3.54356e-05	3.30877e-05	3.07398e-05	2.83919e-05	2.60441e-05	2.36962e-05	2.13483e-05	1.90004e-05	1.66526e-05	1.43047e-05	1.19568e-05	3.21575e-05	5.0498e-06	8.16666e-07	2.21777e-05	3.08146e-05	-0.000190507	-0.000456345	-0.000655777	-0.000215946	0.00135
355.226	0	0	-8.9587e-06	-3.80454e-05	-4.75282e-05	-1.87182e-05	0.000101749	-2.26526e-05	3.41609e-05	-2.44128e-05	2.09452e-05	2.34817e-05	2.60182e-05	2.85546e-05	2.72264e-05	2.52038e-05	2.31813e-05	2.11587e-05	1.91361e-05	1.71136e-05	1.5091e-05	1.30684e-05	1.10459e-05	9.02331e-06	7.00075e-06	4.97818e-06	2.95561e-06	9.33046e-07	-1.08952e-06	-3.11209e-06	-5.13465e-06	-7.15722e-06	-9.17979e-06	-1.12024e-05	-1.32249e-05	-1.52475e-05	-1.72701e-05	-1.92926e-05	-2.13152e-05	-1.72264e-05	-1.33593e-05	-2.14418e-05	1.95665e-05	1.50118e-05	-0.000194911	-0.000447136	-0.000697884	-0.000294995	0.00126
355.864	0	0	-3.28337e-05	1.93558e-05	-1.836e-05	-2.4295e-05	3.94963e-05	-2.09407e-05	5.54769e-05	-6.17527e-05	1.63532e-05	2.06888e-05	2.50244e-05	2.92225e-05	2.83055e-05	2.73885e-05	2.64715e-05	2.55545e-05	2.46375e-05	2.37205e-05	2.28035e-05	2.18864e-05	2.09694e-05	2.00524e-05	1.91354e-05	1.82184e-05	1.73014e-05	1.63844e-05	1.54674e-05	1.45504e-05	1.36333e-05	1.27163e-05	1.17993e-05	1.08823e-05	9.9653e-06	9.04828e-06	8.13127e-06	7.21426e-06	6.58778e-06	1.67105e-05	2.38033e-05	7.50905e-06	4.32229e-05	3.58584e-05	-0.000191606	-0.000420157	-0.000688953	-0.000399807	0.00119
356.502	0	0	-4.17993e-05	2.64079e-05	-2.24964e-05	-2.07778e-05	8.40557e-05	-1.90302e-05	1.04963e-05	-6.56276e-05	5.01517e-05	5.58296e-05	6.15076e-05	6.56668e-05	6.38723e-05	6.20778e-05	6.02833e-05	5.84888e-05	5.66943e-05	5.48998e-05	5.31053e-05	5.13109e-05	4.95164e-05	4.77219e-05	4.59274e-05	4.41329e-05	4.23384e-05	4.05439e-05	3.87495e-05	3.6955e-05	3.51605e-05	3.3366e-05	3.15715e-05	2.9777e-05	2.79825e-05	2.61881e-05	2.43936e-05	2.25991e-05	2.86904e-05	4.56166e-05	5.81213e-06	4.06572e-05	2.87823e-05	-2.18798e-05	-0.000197684	-0.000406194	-0.000696605	-0.000356882	0.00116
357.14	0	0	-3.55352e-05	-2.44614e-05	-2.66695e-05	1.60615e-06	7.28719e-05	1.14066e-06	7.13067e-06	-5.59032e-05	3.16494e-05	3.5901e-05	4.01525e-05	4.14996e-05	3.80865e-05	3.46734e-05	3.12603e-05	2.78472e-05	2.44341e-05	2.1021e-05	1.76079e-05	1.41948e-05	1.07817e-05	7.36863e-06	3.95554e-06	5.42442e-07	-2.87065e-06	-6.28375e-06	-9.69684e-06	-1.31099e-05	-1.6523e-05	-1.99361e-05	-2.33492e-05	-2.67623e-05	-3.01754e-05	-3.35885e-05	-3.70016e-05	-4.04147e-05	-1.14399e-05	2.63261e-05	6.24127e-06	2.78074e-06	1.64596e-05	-2.23509e-05	-0.000203704	-0.000422316	-0.00066113	-0.000286298	0.00122
357.778	0	0	-4.1829e-05	-1.67079e-05	1.72451e-05	-5.94836e-05	1.85379e-05	1.63279e-06	3.85628e-05	-3.29221e-05	3.17861e-05	3.50199e-05	3.82536e-05	3.83561e-05	3.59307e-05	3.35052e-05	3.10797e-05	2.86542e-05	2.62287e-05	2.38032e-05	2.13777e-05	1.89522e-05	1.65267e-05	1.41012e-05	1.16757e-05	9.25022e-06	6.82472e-06	4.39923e-06	1.97374e-06	-4.51758e-07	-2.87725e-06	-5.30275e-06	-7.72824e-06	-1.01537e-05	-1.25792e-05	-1.50047e-05	-1.74302e-05	-1.98557e-05	9.9008e-06	-8.41628e-06	-3.96038e-05	-2.50396e-05	-6.11969e-06	-4.01212e-05	-0.000178339	-0.000465032	-0.000680385	-0.000296032	0.00121
358.417	0	0	-3.34654e-05	-2.85892e-05	-3.9873e-06	-3.88602e-05	2.62192e-05	1.63625e-05	2.43591e-05	-2.30468e-05	2.97364e-05	3.22719e-05	3.48074e-05	3.37923e-05	3.14392e-05	2.9086e-05	2.67329e-05	2.43798e-05	2.20266e-05	1.96735e-05	1.73204e-05	1.49672e-05	1.26141e-05	1.0261e-05	7.90784e-06	5.55471e-06	3.20158e-06	8.48446e-07	-1.50469e-06	-3.85782e-06	-6.21095e-06	-8.56408e-06	-1.09172e-05	-1.32703e-05	-1.56235e-05	-1.79766e-05	-2.03297e-05	-2.26829e-05	3.6153e-05	2.95122e-05	4.72743e-05	2.37051e-05	2.23698e-05	-5.57492e-05	-0.000103856	-0.000424524	-0.000714031	-0.000330157	0.00121
359.055	0	0	3.40616e-06	-1.56902e-05	-1.04877e-05	-2.17022e-05	2.16649e-05	-1.69948e-05	4.0476e-05	-3.11057e-05	8.89878e-06	1.09554e-05	1.30121e-05	1.31832e-05	1.31401e-05	1.3097e-05	1.30539e-05	1.30109e-05	1.29678e-05	1.29247e-05	1.28816e-05	1.28385e-05	1.27954e-05	1.27523e-05	1.27092e-05	1.26661e-05	1.26231e-05	1.258e-05	1.25369e-05	1.24938e-05	1.24507e-05	1.24076e-05	1.23645e-05	1.23214e-05	1.22783e-05	1.22353e-05	1.21922e-05	1.21491e-05	3.03614e-05	7.21275e-06	8.86927e-06	1.55375e-05	7.53281e-05	-3.51176e-05	-7.64792e-05	-0.00040047	-0.000745766	-0.000484445	0.00112
359.693	0	0	-2.79649e-05	-4.62515e-05	1.01925e-05	-3.44839e-05	2.72443e-05	1.46422e-05	3.58533e-05	-2.53317e-05	4.02637e-05	4.33362e-05	4.60112e-05	4.32669e-05	4.05226e-05	3.77783e-05	3.5034e-05	3.22897e-05	2.95453e-05	2.6801e-05	2.40567e-05	2.13124e-05	1.85681e-05	1.58238e-05	1.30795e-05	1.03352e-05	7.59086e-06	4.84655e-06	2.10224e-06	-6.4207e-07	-3.38638e-06	-6.13069e-06	-8.875e-06	-1.16193e-05	-1.43636e-05	-1.71079e-05	-1.98522e-05	-2.24699e-05	-2.70919e-05	-7.0481e-05	4.66633e-05	9.24561e-05	3.13727e-06	-5.27353e-05	-0.000135941	-0.000400349	-0.000746116	-0.000496855	0.0011
360.332	0	0	-4.89958e-05	1.85874e-05	-3.63906e-05	1.67765e-06	6.76936e-05	-1.7203e-05	1.71622e-05	-7.3751e-05	5.70237e-06	9.42853e-06	1.19727e-05	1.07199e-05	9.46712e-06	8.21433e-06	6.96154e-06	5.70875e-06	4.45596e-06	3.20317e-06	1.95038e-06	6.97593e-07	-5.55197e-07	-1.80799e-06	-3.06078e-06	-4.31357e-06	-5.56636e-06	-6.81915e-06	-8.07194e-06	-9.32473e-06	-1.05775e-05	-1.18303e-05	-1.30831e-05	-1.43359e-05	-1.55887e-05	-1.68415e-05	-1.80943e-05	-6.25359e-06	2.39905e-05	-2.87209e-06	1.55706e-05	-2.50781e-06	-4.18102e-06	-5.34997e-05	-9.0932e-05	-0.000435011	-0.000726785	-0.000454553	0.000994747
360.97	0	0	-2.02289e-05	-3.32782e-05	-1.24868e-05	-1.26289e-05	4.13502e-05	-2.78106e-05	9.1498e-05	-4.98078e-05	3.21375e-05	3.60747e-05	3.78096e-05	3.63115e-05	3.48134e-05	3.33153e-05	3.18172e-05	3.03191e-05	2.88209e-05	2.73228e-05	2.58247e-05	2.43266e-05	2.28285e-05	2.13304e-05	1.98322e-05	1.83341e-05	1.6836e-05	1.53379e-05	1.38398e-05	1.23416e-05	1.08435e-05	9.34542e-06	7.8473e-06	6.34918e-06	4.85107e-06	3.35295e-06	1.85483e-06	1.19237e-05	1.04224e-05	-1.18593e-05	2.06485e-05	4.88401e-05	1.27662e-05	-9.88064e-06	-0.000110888	-0.000409844	-0.000681321	-0.000406339	0.000988549
361.609	0	0	-3.89959e-05	-2.77082e-05	5.00553e-05	-2.82024e-05	3.05064e-05	4.12315e-06	1.01173e-05	-4.27499e-05	5.10314e-05	5.51471e-05	5.59745e-05	5.43381e-05	5.27018e-05	5.10655e-05	4.94292e-05	4.77928e-05	4.61565e-05	4.45202e-05	4.28839e-05	4.12475e-05	3.96112e-05	3.79749e-05	3.63386e-05	3.47022e-05	3.30659e-05	3.14296e-05	2.97933e-05	2.81569e-05	2.65206e-05	2.48843e-05	2.32479e-05	2.16116e-05	1.99753e-05	1.8339e-05	1.67026e-05	1.13024e-05	3.41381e-05	4.97952e-05	1.67345e-05	1.94223e-05	-3.44767e-05	-3.58838e-05	-0.00012272	-0.000422573	-0.000724812	-0.000432945	0.00102
362.248	0	0	-2.55797e-05	2.79762e-06	-6.32763e-06	-2.7405e-05	5.29828e-05	-2.05882e-05	2.05939e-05	-5.71e-05	4.80835e-05	5.26943e-05	5.14076e-05	4.80156e-05	4.46236e-05	4.12316e-05	3.78396e-05	3.44476e-05	3.10556e-05	2.76636e-05	2.42716e-05	2.08796e-05	1.74876e-05	1.40955e-05	1.07035e-05	7.31154e-06	3.91953e-06	5.27523e-07	-2.86448e-06	-6.25649e-06	-9.6485e-06	-1.30405e-05	-1.64325e-05	-1.98245e-05	-2.32165e-05	-2.66085e-05	-3.00005e-05	6.92488e-06	-2.19063e-05	7.53849e-06	6.38798e-05	2.87814e-05	-1.68768e-05	2.17413e-05	-0.000102811	-0.000415378	-0.000756102	-0.000492721	0.000966798
362.886	0	0	2.66598e-05	-9.64092e-06	2.48846e-05	-6.04034e-05	6.01091e-05	-3.20202e-05	1.14491e-05	-1.21884e-05	2.09577e-05	2.23943e-05	2.01549e-05	1.75112e-05	1.48675e-05	1.22239e-05	9.58018e-06	6.93651e-06	4.29284e-06	1.64917e-06	-9.94496e-07	-3.63817e-06	-6.28184e-06	-8.92551e-06	-1.15692e-05	-1.42128e-05	-1.68565e-05	-1.95002e-05	-2.21439e-05	-2.47875e-05	-2.74312e-05	-3.00749e-05	-3.27185e-05	-3.53622e-05	-3.80059e-05	-4.06496e-05	-4.32932e-05	-3.38157e-05	-6.62292e-05	6.22074e-06	-3.70075e-05	-3.48387e-05	-5.59884e-05	-2.12588e-06	-0.000139569	-0.000432317	-0.000778081	-0.000618249	0.000896739
363.525	0	0	-2.55317e-08	-6.94936e-05	1.34877e-05	1.90609e-05	3.52498e-05	3.11721e-06	-2.50022e-05	-4.61603e-05	6.32116e-05	6.74042e-05	6.59373e-05	6.44705e-05	6.30036e-05	6.15367e-05	6.00698e-05	5.86029e-05	5.71361e-05	5.56692e-05	5.42023e-05	5.27354e-05	5.12685e-05	4.98017e-05	4.83348e-05	4.68679e-05	4.5401e-05	4.39341e-05	4.24673e-05	4.10004e-05	3.95335e-05	3.80666e-05	3.65997e-05	3.51329e-05	3.3666e-05	3.21991e-05	3.55779e-05	9.9549e-05	1.13109e-05	-1.11724e-05	2.19096e-05	3.1095e-05	1.98811e-06	4.8136e-05	-9.31499e-05	-0.000413689	-0.000733192	-0.000655266	0.000805609
364.164	0	0	3.59184e-05	4.35334e-06	-1.14598e-05	2.32773e-05	2.98854e-05	-6.77172e-05	6.56855e-07	-2.63719e-05	4.60578e-05	4.80313e-05	4.63758e-05	4.47203e-05	4.30648e-05	4.14093e-05	3.97538e-05	3.80983e-05	3.64428e-05	3.47873e-05	3.31318e-05	3.14763e-05	2.98208e-05	2.81653e-05	2.65098e-05	2.48543e-05	2.31988e-05	2.15433e-05	1.98878e-05	1.82323e-05	1.65768e-05	1.49213e-05	1.32658e-05	1.16103e-05	9.9548e-06	8.29929e-06	6.63945e-06	4.07644e-06	9.00137e-06	3.96896e-05	1.75712e-05	-4.43087e-05	-4.51875e-05	-4.85629e-05	-0.000126153	-0.000433252	-0.000749817	-0.000603321	0.000812615
364.803	0	0	-2.72562e-05	-6.50919e-06	-4.54242e-05	-2.42801e-05	2.94424e-05	3.04047e-05	-1.94023e-05	2.82615e-06	3.45306e-05	3.48724e-05	3.37258e-05	3.25792e-05	3.14325e-05	3.02859e-05	2.91393e-05	2.79927e-05	2.68461e-05	2.56994e-05	2.45528e-05	2.34062e-05	2.22596e-05	2.11129e-05	1.99663e-05	1.88197e-05	1.76731e-05	1.65265e-05	1.53798e-05	1.42332e-05	1.30866e-05	1.194e-05	1.07934e-05	9.64674e-06	8.50011e-06	7.35349e-06	-8.39868e-06	-3.50454e-05	-3.78597e-06	2.4412e-05	-3.25573e-06	-7.6363e-06	-2.71697e-05	3.48076e-06	-9.6773e-05	-0.000375619	-0.000754	-0.000532707	0.000922866
365.442	0	0	-2.39963e-05	-4.20565e-06	1.07731e-05	2.05964e-05	-4.85752e-05	2.52366e-05	-3.46513e-05	5.06072e-05	6.53213e-05	6.45135e-05	6.25842e-05	6.06549e-05	5.87256e-05	5.67963e-05	5.4867e-05	5.29377e-05	5.10084e-05	4.90791e-05	4.71498e-05	4.52205e-05	4.32912e-05	4.13619e-05	3.94326e-05	3.75033e-05	3.55741e-05	3.36448e-05	3.17155e-05	2.97862e-05	2.78569e-05	2.59276e-05	2.39983e-05	2.2069e-05	2.01397e-05	1.82104e-05	-2.07622e-05	2.292e-06	2.06422e-05	-2.98355e-05	-1.88691e-05	-5.9286e-06	-2.13168e-06	-2.64207e-05	-0.000171371	-0.000447594	-0.000751211	-0.000539147	0.000869726
366.081	0	0	2.3529e-05	-5.27953e-05	2.08395e-05	2.83091e-06	1.47398e-05	1.28607e-05	-2.39919e-05	-8.13777e-05	3.37474e-05	3.43289e-05	3.3173e-05	3.20172e-05	3.08614e-05	2.97056e-05	2.85498e-05	2.73939e-05	2.62381e-05	2.50823e-05	2.39265e-05	2.27707e-05	2.16149e-05	2.0459e-05	1.93032e-05	1.81474e-05	1.69916e-05	1.58358e-05	1.46799e-05	1.35241e-05	1.23683e-05	1.12125e-05	1.00567e-05	8.90085e-06	7.74503e-06	6.58922e-06	-3.85684e-05	-3.85843e-05	1.4372e-06	2.33998e-05	4.95992e-05	-3.42872e-05	-3.20702e-05	2.39221e-06	-0.000128877	-0.000486749	-0.000780767	-0.00060804	0.000894975
366.72	0	0	-1.0055e-05	-1.29803e-05	-2.49109e-05	-2.88663e-05	2.19998e-05	4.17863e-05	-4.43666e-05	-2.86228e-05	7.91024e-05	7.66797e-05	7.31537e-05	6.96276e-05	6.61015e-05	6.25755e-05	5.90494e-05	5.55233e-05	5.19973e-05	4.84712e-05	4.49452e-05	4.14191e-05	3.7893e-05	3.4367e-05	3.08409e-05	2.73148e-05	2.37888e-05	2.02627e-05	1.67367e-05	1.32106e-05	9.68454e-06	6.15848e-06	2.63242e-06	-8.93645e-07	-4.41971e-06	-7.94577e-06	-2.40569e-05	4.89143e-05	1.52792e-05	-1.72094e-05	3.07567e-05	-6.26637e-05	3.61613e-06	-9.34942e-06	-8.92562e-05	-0.00038551	-0.000815002	-0.000644625	0.000853269
367.359	0	-1.81962e-05	2.59284e-05	-9.60468e-05	-5.24928e-06	-1.9105e-05	6.01236e-05	-1.09702e-05	3.54578e-05	1.26006e-05	1.54718e-05	1.5091e-05	1.47102e-05	1.43295e-05	1.39487e-05	1.35679e-05	1.31871e-05	1.28064e-05	1.24256e-05	1.20448e-05	1.16641e-05	1.12833e-05	1.09025e-05	1.05218e-05	1.0141e-05	9.76022e-06	9.37946e-06	8.99869e-06	8.61792e-06	8.23715e-06	7.85638e-06	7.47561e-06	7.09484e-06	6.71407e-06	6.3333e-06	6.21464e-06	2.23735e-05	-7.0138e-06	-2.48597e-05	9.68579e-06	2.26375e-05	-3.09922e-05	3.01657e-05	-3.66235e-05	-4.62709e-05	-0.000367216	-0.000789218	-0.000717616	0.00077176
367.999	0	2.65409e-05	2.01853e-05	-4.69393e-05	-1.01745e-05	-1.06629e-05	8.73615e-05	-9.47273e-06	-1.23424e-05	-5.09509e-05	6.63173e-06	8.4828e-06	1.03339e-05	1.2185e-05	1.4036e-05	1.58871e-05	1.77382e-05	1.95892e-05	2.14403e-05	2.32914e-05	2.51425e-05	2.69935e-05	2.88446e-05	3.06957e-05	3.25468e-05	3.43978e-05	3.62489e-05	3.81e-05	3.99511e-05	4.18021e-05	4.36532e-05	4.55043e-05	4.73553e-05	4.92064e-05	5.10575e-05	3.72183e-05	-2.3236e-05	3.55713e-05	-3.23484e-05	-2.57214e-05	4.08268e-05	-3.34288e-05	2.8609e-05	5.78971e-05	-7.74258e-05	-0.000408601	-0.000766186	-0.000625679	0.000720495
368.638	0	-5.11217e-06	6.43057e-05	-4.42324e-05	-7.8777e-05	5.75721e-05	-5.09112e-05	-2.77525e-05	0.000113239	1.24353e-05	-3.99077e-05	-3.58402e-05	-3.17728e-05	-2.77053e-05	-2.36379e-05	-1.95704e-05	-1.55029e-05	-1.14355e-05	-7.36802e-06	-3.30057e-06	7.66893e-07	4.83435e-06	8.90181e-06	1.29693e-05	1.70367e-05	2.11042e-05	2.51716e-05	2.92391e-05	3.33066e-05	3.7374e-05	4.14415e-05	4.55089e-05	4.95764e-05	5.36439e-05	5.77113e-05	4.61497e-05	5.79744e-06	-1.09232e-05	-1.56143e-05	-4.02827e-05	-3.39604e-05	-1.41538e-05	5.91039e-05	1.76458e-05	-0.000108684	-0.000366778	-0.000706601	-0.00055362	0.000728617
369.277	0	2.45791e-06	7.65829e-06	-3.59798e-05	9.77515e-06	-1.74066e-05	2.84236e-05	-6.6476e-06	1.45524e-06	1.60813e-05	-5.32025e-06	-3.94158e-06	-2.56291e-06	-1.18423e-06	1.94439e-07	1.57311e-06	2.95179e-06	4.33046e-06	5.70913e-06	7.0878e-06	8.46648e-06	9.84515e-06	1.12238e-05	1.26025e-05	1.39812e-05	1.53598e-05	1.67385e-05	1.81172e-05	1.94959e-05	2.08745e-05	2.22532e-05	2.36319e-05	2.50106e-05	2.63892e-05	2.77679e-05	5.2354e-05	2.92915e-05	-1.29638e-05	-3.33273e-07	3.309e-05	2.39547e-05	-4.85637e-06	-1.3336e-05	-1.48707e-05	-7.78428e-05	-0.000409481	-0.000765138	-0.000539549	0.000760344
369.917	0	-1.20197e-05	8.85242e-05	-1.33093e-05	1.7937e-05	-4.01641e-05	2.0957e-05	-5.98101e-05	-4.67115e-08	-4.36049e-05	4.23578e-05	4.13623e-05	4.03668e-05	3.93713e-05	3.83758e-05	3.73803e-05	3.63848e-05	3.53893e-05	3.43938e-05	3.33983e-05	3.24028e-05	3.14073e-05	3.04119e-05	2.94164e-05	2.84209e-05	2.74254e-05	2.64299e-05	2.54344e-05	2.44389e-05	2.34434e-05	2.24479e-05	2.14524e-05	2.04569e-05	1.94614e-05	1.84659e-05	1.63797e-05	-3.84573e-05	-7.02332e-05	-3.92992e-05	8.36123e-06	4.51307e-06	-2.77511e-05	4.98213e-06	1.27954e-05	-0.000103225	-0.000416621	-0.000767065	-0.000602614	0.000764502
370.556	0	7.3859e-06	1.72115e-05	4.33789e-05	-1.00983e-05	-3.05925e-05	1.28491e-06	-5.13151e-05	4.37915e-05	-2.61993e-05	6.07044e-06	7.33299e-06	8.59555e-06	9.8581e-06	1.11207e-05	1.23832e-05	1.36458e-05	1.49083e-05	1.61709e-05	1.74334e-05	1.8696e-05	1.99585e-05	2.12211e-05	2.24836e-05	2.37462e-05	2.50088e-05	2.62713e-05	2.75339e-05	2.87964e-05	3.0059e-05	3.13215e-05	3.25841e-05	3.38466e-05	3.51092e-05	3.63717e-05	3.67192e-05	-7.03165e-05	-2.57257e-05	3.93641e-05	2.92129e-05	3.72395e-06	5.23005e-05	1.7777e-05	5.43161e-06	-0.000120125	-0.000397777	-0.0007456	-0.000616312	0.000633394
371.196	0	-1.12948e-05	-3.25317e-05	-4.91445e-05	-1.87931e-05	2.45958e-05	-1.07545e-07	7.12531e-05	1.22288e-05	-2.54685e-06	8.22184e-06	9.55442e-06	1.0887e-05	1.22196e-05	1.35522e-05	1.48847e-05	1.62173e-05	1.75499e-05	1.88825e-05	2.0215e-05	2.15476e-05	2.28802e-05	2.42128e-05	2.55454e-05	2.68779e-05	2.82105e-05	2.95431e-05	3.08757e-05	3.22082e-05	3.35408e-05	3.48734e-05	3.6206e-05	3.75386e-05	3.88711e-05	4.02037e-05	-1.28963e-05	8.68205e-06	-3.73452e-05	-1.97378e-05	3.75597e-05	-8.55082e-05	-1.77494e-05	-4.35008e-05	-4.70306e-05	-9.51179e-05	-0.00037828	-0.000772624	-0.000726943	0.000545396
371.835	0	9.7461e-06	5.17189e-06	-5.49535e-05	1.12956e-05	-8.12459e-05	-1.92291e-07	8.0614e-06	7.10483e-05	2.21403e-05	8.64963e-06	8.42763e-06	8.20563e-06	7.98363e-06	7.76163e-06	7.53963e-06	7.31763e-06	7.09563e-06	6.87363e-06	6.65164e-06	6.42964e-06	6.20764e-06	5.98564e-06	5.76364e-06	5.54164e-06	5.31964e-06	5.09764e-06	4.87564e-06	4.65364e-06	4.43164e-06	4.20965e-06	3.98765e-06	3.76565e-06	3.54365e-06	3.9265e-06	9.88299e-06	-7.74967e-06	6.08271e-06	3.97119e-05	-3.63856e-05	-1.09427e-05	6.79846e-06	5.18719e-05	2.42615e-09	-6.89908e-05	-0.00036359	-0.000670103	-0.000705321	0.000564625
372.475	0	5.58333e-06	-3.29517e-05	-4.88544e-05	-4.99517e-05	1.44613e-06	1.56787e-05	5.15081e-06	4.5633e-05	2.41039e-05	3.67792e-05	3.78035e-05	3.88278e-05	3.98521e-05	4.08764e-05	4.19007e-05	4.2925e-05	4.39493e-05	4.49736e-05	4.59979e-05	4.70222e-05	4.80465e-05	4.90708e-05	5.00951e-05	5.11194e-05	5.21437e-05	5.3168e-05	5.41923e-05	5.52166e-05	5.62409e-05	5.72652e-05	5.82895e-05	5.93138e-05	6.03381e-05	4.5548e-05	-3.35867e-06	1.80305e-05	-3.03006e-06	-4.66204e-05	1.4174e-05	-1.96407e-05	3.74436e-05	1.3123e-05	6.8106e-06	-7.14861e-05	-0.000382272	-0.000746875	-0.000639635	0.000566864
373.115	0	3.09674e-05	-1.63832e-05	-5.57037e-08	1.23902e-05	2.90639e-05	-4.35039e-05	-5.45015e-05	4.63544e-05	-3.00185e-05	2.27504e-05	2.09424e-05	1.91344e-05	1.73265e-05	1.55185e-05	1.37106e-05	1.19026e-05	1.00947e-05	8.28671e-06	6.47875e-06	4.6708e-06	2.86284e-06	1.05488e-06	-7.53073e-07	-2.56103e-06	-4.36899e-06	-6.17694e-06	-7.9849e-06	-9.79286e-06	-1.16008e-05	-1.34088e-05	-1.52167e-05	-1.70247e-05	-1.88326e-05	-1.61912e-05	1.92186e-06	4.94208e-06	-3.19976e-05	-1.45698e-05	1.79498e-05	3.09567e-05	8.72911e-05	4.37262e-05	2.73616e-05	-0.000102797	-0.000391662	-0.000696886	-0.000597332	0.000609714
373.754	0	-4.68021e-05	-1.59621e-06	2.07691e-05	-3.57392e-05	-2.29725e-05	9.90764e-05	-3.0287e-05	5.36204e-05	-1.72646e-05	-1.53242e-05	-1.4332e-05	-1.33398e-05	-1.23476e-05	-1.13554e-05	-1.03633e-05	-9.37108e-06	-8.37889e-06	-7.38671e-06	-6.39452e-06	-5.40233e-06	-4.41015e-06	-3.41796e-06	-2.42578e-06	-1.43359e-06	-4.41405e-07	5.50781e-07	1.54297e-06	2.53515e-06	3.52734e-06	4.51952e-06	5.51171e-06	6.5039e-06	7.49608e-06	1.41914e-05	-8.92699e-07	-1.3415e-05	-2.67424e-05	-1.08215e-05	3.90025e-06	-6.50145e-06	8.28857e-06	1.0738e-05	-1.39822e-05	-0.000109457	-0.000379054	-0.000689109	-0.000614969	0.000603255
374.394	0	-1.43451e-05	-4.08338e-05	-1.31532e-05	-1.58955e-05	7.57634e-05	2.60845e-06	1.25516e-06	2.68694e-05	-3.45637e-05	1.31909e-05	1.26777e-05	1.21646e-05	1.16515e-05	1.11384e-05	1.06253e-05	1.01122e-05	9.59908e-06	9.08597e-06	8.57286e-06	8.05975e-06	7.54664e-06	7.03353e-06	6.52043e-06	6.00732e-06	5.49421e-06	4.9811e-06	4.46799e-06	3.95488e-06	3.44177e-06	2.92866e-06	2.41555e-06	1.90244e-06	1.38933e-06	-1.44936e-06	-2.01749e-05	-3.26185e-05	-2.88871e-05	-1.19138e-05	-1.0171e-05	2.06663e-05	-3.13093e-05	5.92778e-05	6.0249e-05	-8.83627e-05	-0.000370521	-0.000728495	-0.000662948	0.000632223
375.034	0	-2.20544e-05	-3.81673e-05	6.33713e-06	1.44803e-05	3.70573e-05	1.91895e-05	-3.82222e-05	4.89312e-05	-4.68434e-05	2.81612e-05	3.13792e-05	3.45972e-05	3.78153e-05	4.10333e-05	4.42513e-05	4.74693e-05	5.06874e-05	5.39054e-05	5.71234e-05	6.03414e-05	6.35594e-05	6.67775e-05	6.99955e-05	7.32135e-05	7.64315e-05	7.96496e-05	8.28676e-05	8.60856e-05	8.93036e-05	9.25217e-05	9.57397e-05	9.89577e-05	0.000102176	6.38493e-05	-4.86053e-06	3.84573e-05	8.7692e-05	8.70335e-06	-4.4865e-05	4.87799e-05	1.76224e-05	3.39717e-05	3.0153e-05	-5.55531e-05	-0.000302776	-0.000730315	-0.000711393	0.000600935
375.674	0	-1.64782e-05	-1.24925e-06	3.16335e-06	-5.0712e-06	-1.65667e-05	-2.77063e-05	-5.03381e-05	-6.92196e-06	6.85894e-05	5.56871e-05	5.42416e-05	5.27961e-05	5.13505e-05	4.9905e-05	4.84595e-05	4.70139e-05	4.55684e-05	4.41229e-05	4.26774e-05	4.12318e-05	3.97863e-05	3.83408e-05	3.68952e-05	3.54497e-05	3.40042e-05	3.25586e-05	3.11131e-05	2.96676e-05	2.8222e-05	2.67765e-05	2.5331e-05	2.38854e-05	2.24399e-05	5.02035e-05	7.35293e-05	1.61637e-05	-1.77336e-05	3.0403e-05	2.29337e-05	5.50634e-05	2.78681e-06	-1.13465e-05	4.45837e-05	-6.48398e-05	-0.000317298	-0.000666998	-0.000685724	0.000590256
376.314	0	-1.57322e-05	2.76276e-05	-5.92345e-05	-2.98028e-05	-4.37201e-05	-1.86548e-06	3.82414e-05	-2.45334e-05	6.13824e-06	0.0001017	9.57532e-05	8.98063e-05	8.38594e-05	7.79125e-05	7.19656e-05	6.60187e-05	6.00718e-05	5.41249e-05	4.8178e-05	4.22311e-05	3.62842e-05	3.03373e-05	2.43904e-05	1.84435e-05	1.24966e-05	6.54972e-06	6.02824e-07	-5.34407e-06	-1.1291e-05	-1.72379e-05	-2.31848e-05	-2.91317e-05	-2.85953e-05	3.29424e-05	-5.71091e-05	-4.55997e-05	-3.29143e-05	7.03836e-05	-4.56496e-05	-6.8904e-05	1.46227e-06	3.44497e-05	9.32542e-06	-6.56908e-05	-0.000311614	-0.00073449	-0.000767159	0.00046316
376.954	0	6.58768e-06	4.55594e-05	-3.69133e-05	3.16547e-07	7.97561e-06	1.85843e-05	-2.35385e-05	-6.58035e-06	2.15878e-06	-6.13685e-06	-1.81844e-06	2.49997e-06	6.81838e-06	1.11368e-05	1.54552e-05	1.97736e-05	2.4092e-05	2.84104e-05	3.27288e-05	3.70472e-05	4.13656e-05	4.56841e-05	5.00025e-05	5.43209e-05	5.86393e-05	6.29577e-05	6.72761e-05	7.15945e-05	7.59129e-05	8.02313e-05	8.45497e-05	8.88681e-05	7.71001e-05	1.64516e-05	-1.1136e-05	-1.31463e-05	3.28091e-05	4.60056e-05	-1.18076e-05	2.38722e-05	-4.51771e-06	-6.99179e-06	-2.44618e-05	-0.000119267	-0.000364347	-0.000680314	-0.000694063	0.000438817
377.595	0	5.80409e-05	-5.17631e-05	-2.07902e-06	6.67898e-06	-1.03842e-05	-4.01112e-05	1.09713e-05	5.40471e-05	1.24352e-08	-3.66758e-05	-3.72377e-05	-3.77996e-05	-3.83615e-05	-3.89234e-05	-3.94853e-05	-4.00473e-05	-4.06092e-05	-4.11711e-05	-4.1733e-05	-4.22949e-05	-4.28568e-05	-4.34187e-05	-4.39807e-05	-4.45426e-05	-4.51045e-05	-4.56664e-05	-4.62283e-05	-4.67902e-05	-4.73522e-05	-4.79141e-05	-4.8476e-05	-4.90379e-05	-5.38882e-05	-4.2231e-05	7.26926e-07	2.2079e-06	1.77297e-05	4.88535e-05	1.72725e-05	4.72736e-05	9.28899e-06	4.6542e-05	1.55893e-05	-0.000142384	-0.000343772	-0.000633717	-0.000629946	0.000511158
378.235	0	1.86325e-05	-1.05019e-05	-2.37697e-05	3.03261e-06	-3.71288e-05	-1.4479e-05	4.38496e-05	-1.65732e-05	-1.34224e-05	4.72799e-05	4.47702e-05	4.22606e-05	3.97509e-05	3.72413e-05	3.47316e-05	3.22219e-05	2.97123e-05	2.72026e-05	2.4693e-05	2.21833e-05	1.96736e-05	1.7164e-05	1.46543e-05	1.21447e-05	9.635e-06	7.12534e-06	4.61568e-06	2.10602e-06	-4.03645e-07	-2.9133e-06	-5.42297e-06	-7.93263e-06	-2.36251e-05	-3.36442e-06	4.65858e-06	-1.37517e-05	7.95521e-07	7.47796e-06	-3.56287e-05	-2.1975e-05	2.03298e-05	-9.94842e-06	-1.99834e-05	-8.67812e-05	-0.000328265	-0.000605753	-0.000537382	0.000557582
378.875	0	5.43638e-06	-2.71611e-05	-6.61439e-05	5.05286e-05	-1.985e-05	9.81732e-07	3.38924e-05	5.48726e-06	1.98701e-05	-1.41265e-07	1.47767e-06	3.0966e-06	4.71554e-06	6.33447e-06	7.95341e-06	9.57234e-06	1.11913e-05	1.28102e-05	1.44291e-05	1.60481e-05	1.7667e-05	1.9286e-05	2.09049e-05	2.25238e-05	2.41428e-05	2.57617e-05	2.73806e-05	2.89996e-05	3.06185e-05	3.22374e-05	3.38564e-05	3.54753e-05	4.68573e-05	-1.20697e-06	6.28696e-06	5.22889e-06	4.46991e-05	2.94871e-05	1.69426e-05	1.55531e-05	3.41056e-05	1.02267e-05	-3.47944e-06	-9.28317e-05	-0.000350016	-0.000668975	-0.000642847	0.000609627
379.516	0	-7.49461e-06	-1.63377e-05	7.56844e-06	2.65351e-05	4.29332e-05	1.7075e-05	8.95873e-06	4.08774e-06	-5.23339e-05	-3.26945e-05	-3.21877e-05	-3.16809e-05	-3.11741e-05	-3.06673e-05	-3.01605e-05	-2.96537e-05	-2.91469e-05	-2.86402e-05	-2.81334e-05	-2.76266e-05	-2.71198e-05	-2.6613e-05	-2.61062e-05	-2.55994e-05	-2.50926e-05	-2.45858e-05	-2.40791e-05	-2.35723e-05	-2.30655e-05	-2.25587e-05	-2.20519e-05	-2.15451e-05	-6.42667e-06	-1.52047e-06	-6.86212e-06	-4.4655e-06	-1.95999e-05	1.4829e-05	8.70003e-06	-3.25719e-05	5.20982e-05	-5.46417e-06	-1.37659e-05	-0.000123866	-0.000368601	-0.000663763	-0.000650666	0.000536058
380.156	0	2.6059e-05	1.3172e-05	-9.10581e-05	5.87791e-05	-1.4056e-05	3.18437e-05	4.31477e-05	-1.74173e-05	-2.56872e-05	-1.75185e-05	-1.27369e-05	-7.95521e-06	-3.17355e-06	1.60811e-06	6.38977e-06	1.11714e-05	1.59531e-05	2.07348e-05	2.55164e-05	3.02981e-05	3.50797e-05	3.98614e-05	4.46431e-05	4.94247e-05	5.42064e-05	5.8988e-05	6.37697e-05	6.85514e-05	7.3333e-05	7.81147e-05	8.28964e-05	8.7678e-05	3.54127e-06	1.40989e-05	2.59664e-07	-1.9672e-05	-2.06436e-05	-2.74276e-05	1.30026e-05	-3.27518e-05	-1.12909e-05	9.60825e-06	5.76719e-05	-5.81327e-05	-0.000303334	-0.000708295	-0.000736024	0.000570131
380.797	0	-9.57011e-06	3.57177e-06	-3.23519e-05	-3.6024e-06	-3.54553e-06	3.25395e-05	3.23472e-05	1.67671e-05	-5.79348e-05	2.79536e-05	2.84414e-05	2.89292e-05	2.94171e-05	2.99049e-05	3.03927e-05	3.08806e-05	3.13684e-05	3.18562e-05	3.23441e-05	3.28319e-05	3.33197e-05	3.38076e-05	3.42954e-05	3.47832e-05	3.52711e-05	3.57589e-05	3.62467e-05	3.67346e-05	3.72224e-05	3.77102e-05	3.81981e-05	3.82198e-05	2.30298e-05	-7.14704e-05	-7.681e-05	-3.77342e-05	9.75532e-06	-2.33264e-05	-1.33616e-05	1.90273e-05	-2.0422e-05	-8.33893e-05	-4.02303e-05	-0.000123818	-0.000352445	-0.000708908	-0.000817913	0.000358282
381.437	0	-1.33145e-06	-2.74669e-05	-3.01039e-05	-2.48064e-05	-9.99554e-06	1.41729e-05	8.87914e-07	5.97301e-05	1.51866e-05	8.68084e-06	1.01826e-05	1.16843e-05	1.3186e-05	1.46877e-05	1.61894e-05	1.76911e-05	1.91928e-05	2.06945e-05	2.21962e-05	2.36979e-05	2.51997e-05	2.67014e-05	2.82031e-05	2.97048e-05	3.12065e-05	3.27082e-05	3.42099e-05	3.57116e-05	3.72133e-05	3.87151e-05	4.02168e-05	4.1586e-05	3.01976e-05	-3.07656e-05	-1.89692e-05	8.85924e-05	2.33951e-05	-1.6548e-05	-1.41431e-05	-3.565e-05	1.98969e-05	5.95019e-05	1.91957e-05	-9.16003e-05	-0.000317168	-0.000647678	-0.00069545	0.000406227
382.078	0	-5.00421e-05	1.76821e-05	-2.53745e-06	-7.69932e-06	4.90864e-06	1.51438e-05	6.61728e-05	-5.62725e-06	-2.48344e-05	-2.25551e-06	-1.14669e-06	-3.78641e-08	1.07096e-06	2.17978e-06	3.2886e-06	4.39743e-06	5.50625e-06	6.61507e-06	7.7239e-06	8.83272e-06	9.94154e-06	1.10504e-05	1.21592e-05	1.3268e-05	1.43768e-05	1.54857e-05	1.65945e-05	1.77033e-05	1.88121e-05	1.99209e-05	2.10298e-05	1.17008e-05	-2.06363e-05	-2.15372e-05	-6.82187e-08	-3.14554e-05	1.47261e-05	-9.27808e-06	-4.25269e-06	-1.57177e-05	-2.62598e-05	-2.82089e-05	-2.63424e-05	-5.49831e-05	-0.000319241	-0.000678079	-0.000626874	0.000432472
382.718	0	-4.1193e-05	-9.82133e-06	-2.55681e-06	4.48199e-05	7.36709e-06	1.0057e-05	-7.03607e-06	-1.78502e-05	-5.10439e-05	7.49891e-05	7.1979e-05	6.89688e-05	6.59586e-05	6.29484e-05	5.99383e-05	5.69281e-05	5.39179e-05	5.09078e-05	4.78976e-05	4.48874e-05	4.18772e-05	3.88671e-05	3.58569e-05	3.28467e-05	2.98365e-05	2.68264e-05	2.38162e-05	2.0806e-05	1.77959e-05	1.47857e-05	1.17755e-05	-5.08245e-06	-1.07537e-05	8.86364e-06	-1.10675e-05	5.46372e-06	-2.66583e-06	-3.87597e-05	1.51217e-05	3.07723e-05	4.29021e-05	-1.11018e-05	-3.86954e-05	-8.88255e-05	-0.000329703	-0.000668944	-0.000600378	0.000389816
383.359	0	2.95162e-05	7.27301e-07	-1.77466e-05	7.81188e-06	3.10001e-05	7.62701e-06	1.99351e-06	-3.61905e-05	-1.12054e-05	-1.68061e-05	-1.5521e-05	-1.42359e-05	-1.29508e-05	-1.16657e-05	-1.03806e-05	-9.0955e-06	-7.81041e-06	-6.52531e-06	-5.24022e-06	-3.95513e-06	-2.67004e-06	-1.38494e-06	-9.98493e-08	1.18524e-06	2.47034e-06	3.75543e-06	5.04052e-06	6.32562e-06	7.61071e-06	8.8958e-06	1.01809e-05	1.8653e-05	2.34816e-05	1.49204e-05	4.05854e-05	2.2586e-05	-2.03784e-05	-3.49715e-05	-2.74465e-05	8.08883e-07	2.01194e-05	3.81704e-05	2.04909e-05	-6.03771e-05	-0.000325386	-0.000659655	-0.000574648	0.000492429
384	0	-2.89748e-05	-3.05032e-05	-1.34007e-05	3.00687e-05	2.16186e-05	7.41955e-05	-2.35182e-05	2.41616e-06	9.53197e-06	-4.38315e-05	-4.38707e-05	-4.39099e-05	-4.39492e-05	-4.39884e-05	-4.40276e-05	-4.40668e-05	-4.41061e-05	-4.41453e-05	-4.41845e-05	-4.42238e-05	-4.4263e-05	-4.43022e-05	-4.43415e-05	-4.43807e-05	-4.44199e-05	-4.44591e-05	-4.44984e-05	-4.45376e-05	-4.45768e-05	-4.46161e-05	-4.46553e-05	6.56077e-06	-1.16789e-05	-3.76446e-06	-1.46337e-05	-4.32609e-06	4.76432e-06	-2.0178e-05	-2.83384e-05	3.86773e-05	-1.16089e-05	-2.99904e-05	2.07922e-05	-2.00701e-05	-0.000314764	-0.000637373	-0.000631372	0.000429724
384.641	0	3.31381e-06	-1.43998e-05	-3.59144e-05	3.57788e-05	2.13999e-05	-2.85643e-05	1.94335e-05	3.14604e-05	-3.96499e-05	2.3756e-06	1.0456e-06	-2.8439e-07	-1.61438e-06	-2.94438e-06	-4.27437e-06	-5.60437e-06	-6.93436e-06	-8.26436e-06	-9.59435e-06	-1.09243e-05	-1.22543e-05	-1.35843e-05	-1.49143e-05	-1.62443e-05	-1.75743e-05	-1.89043e-05	-2.02343e-05	-2.15643e-05	-2.28943e-05	-2.42243e-05	-2.55543e-05	2.02964e-05	-2.6884e-05	5.94771e-05	-1.71567e-05	4.44831e-05	-1.62032e-05	1.14727e-05	3.30024e-05	5.31721e-05	5.91529e-06	1.14379e-05	1.32716e-05	-2.88419e-05	-0.000304086	-0.000646688	-0.000654413	0.000299324
385.282	0	5.01077e-06	9.94069e-06	8.74565e-06	2.99766e-05	-4.0408e-05	-6.77109e-06	3.26116e-05	-4.88004e-06	-1.97016e-05	-3.55354e-06	9.50338e-08	3.74361e-06	7.39218e-06	1.10408e-05	1.46893e-05	1.83379e-05	2.19865e-05	2.5635e-05	2.92836e-05	3.29322e-05	3.65808e-05	4.02293e-05	4.38779e-05	4.75265e-05	5.1175e-05	5.48236e-05	5.84722e-05	6.21208e-05	6.57693e-05	6.94179e-05	7.30665e-05	4.01949e-05	-1.3304e-05	3.48384e-06	-1.50968e-05	5.4547e-05	-4.92262e-05	-3.34746e-05	3.1864e-05	9.58626e-05	2.88504e-06	1.91538e-05	4.77057e-06	-6.78504e-05	-0.000297309	-0.000606391	-0.000722157	0.000247731
385.923	0	-6.02701e-07	-1.2594e-06	-1.87462e-05	-2.68163e-05	-2.54266e-05	4.78727e-06	-9.29506e-06	-2.03009e-05	3.76186e-06	8.80232e-05	8.20424e-05	7.60616e-05	7.00808e-05	6.41001e-05	5.81193e-05	5.21385e-05	4.61578e-05	4.0177e-05	3.41962e-05	2.82155e-05	2.22347e-05	1.62539e-05	1.02731e-05	4.29237e-06	-1.6884e-06	-7.66917e-06	-1.36499e-05	-1.96307e-05	-2.56115e-05	-3.15922e-05	-3.28689e-05	2.12334e-05	5.43255e-05	1.71574e-05	3.75707e-05	5.85991e-05	2.82397e-05	6.5805e-05	2.7971e-05	0.000148232	3.7142e-05	-8.26435e-06	-1.57414e-05	-8.72796e-05	-0.000303028	-0.000640142	-0.00069488	0.000230531
386.564	0	2.04036e-05	4.77675e-05	8.86106e-06	3.73889e-05	-1.75586e-05	2.27568e-05	-6.13481e-06	-6.44906e-06	-6.13291e-05	-5.75496e-05	-5.75477e-05	-5.75457e-05	-5.75437e-05	-5.75417e-05	-5.75398e-05	-5.75378e-05	-5.75358e-05	-5.75339e-05	-5.75319e-05	-5.75299e-05	-5.7528e-05	-5.7526e-05	-5.7524e-05	-5.75221e-05	-5.75201e-05	-5.75181e-05	-5.75161e-05	-5.75142e-05	-5.75122e-05	-5.75102e-05	-4.31633e-05	1.03633e-05	-7.67425e-06	-2.23138e-05	1.8488e-05	-6.99827e-06	-2.05831e-05	2.94531e-05	-1.22211e-05	3.03447e-05	-1.03836e-05	-2.13681e-05	-6.11175e-05	-5.40699e-05	-0.000317671	-0.00067483	-0.000655227	0.000233019
387.205	0	-1.05878e-05	-2.11704e-05	-2.0059e-05	-5.98402e-06	-1.55713e-05	-1.29224e-05	3.05395e-05	4.19384e-05	1.92159e-05	6.2451e-06	8.78704e-06	1.1329e-05	1.38709e-05	1.64128e-05	1.89548e-05	2.14967e-05	2.40387e-05	2.65806e-05	2.91225e-05	3.16645e-05	3.42064e-05	3.67483e-05	3.92903e-05	4.18322e-05	4.43742e-05	4.69161e-05	4.9458e-05	5.2e-05	5.45419e-05	5.70838e-05	4.8491e-05	3.23204e-05	2.79289e-05	8.45527e-06	3.52845e-05	2.26638e-05	-9.98225e-06	1.41905e-05	-1.52345e-05	-7.60795e-06	3.4183e-05	1.35777e-05	-5.30712e-06	-7.19767e-05	-0.000311653	-0.000622538	-0.000683007	0.000298487
387.846	0	8.22303e-06	2.6396e-05	2.25269e-06	-5.45934e-06	-2.91307e-05	-2.71226e-07	-1.23578e-05	1.82456e-05	-2.35339e-05	2.29453e-05	2.39801e-05	2.50148e-05	2.60496e-05	2.70844e-05	2.81192e-05	2.91539e-05	3.01887e-05	3.12235e-05	3.22583e-05	3.3293e-05	3.43278e-05	3.53626e-05	3.63974e-05	3.74321e-05	3.84669e-05	3.95017e-05	4.05365e-05	4.15712e-05	4.2606e-05	4.36408e-05	4.80431e-05	3.59422e-05	1.56476e-05	2.0902e-05	4.54753e-05	2.98644e-05	-1.35324e-05	-4.02089e-05	-2.51321e-06	5.15651e-05	-8.44833e-06	-2.97957e-05	-5.50973e-06	-4.03706e-05	-0.000301689	-0.000665164	-0.000693479	0.000343393
388.488	0	1.74854e-05	-8.75977e-06	-1.69243e-05	6.69179e-06	-6.46892e-06	-1.34499e-05	-6.88726e-06	3.42453e-05	-4.76384e-06	-1.15221e-05	-1.26182e-05	-1.37143e-05	-1.48104e-05	-1.59064e-05	-1.70025e-05	-1.80986e-05	-1.91947e-05	-2.02908e-05	-2.13868e-05	-2.24829e-05	-2.3579e-05	-2.46751e-05	-2.57712e-05	-2.68672e-05	-2.79633e-05	-2.90594e-05	-3.01555e-05	-3.12516e-05	-3.23476e-05	-3.34437e-05	8.35935e-06	4.38547e-05	1.78574e-05	2.28473e-05	4.84841e-05	2.54363e-05	2.07935e-05	2.90198e-05	2.59428e-05	1.54854e-06	2.14577e-05	7.36114e-06	-4.59131e-05	-8.33264e-05	-0.000300112	-0.000593186	-0.000617688	0.00043785
389.129	0	-1.80123e-05	-3.62419e-05	-8.71407e-06	-3.72772e-05	9.69465e-07	6.56797e-05	-1.66957e-05	2.52068e-05	-2.37762e-07	2.01251e-05	1.71846e-05	1.42441e-05	1.13037e-05	8.36319e-06	5.42271e-06	2.48224e-06	-4.5823e-07	-3.3987e-06	-6.33917e-06	-9.27965e-06	-1.22201e-05	-1.51606e-05	-1.81011e-05	-2.10415e-05	-2.3982e-05	-2.69225e-05	-2.9863e-05	-3.28034e-05	-3.57439e-05	-3.86844e-05	-3.36984e-06	-4.5254e-06	-1.85446e-05	2.16917e-06	5.99726e-05	1.84461e-06	-3.8632e-05	1.46157e-05	6.58539e-05	6.62197e-05	5.55013e-05	5.82007e-05	1.44187e-05	-3.49727e-05	-0.00028835	-0.000650278	-0.000713295	0.000467428
389.77	0	-2.08272e-05	-2.8576e-05	-9.00127e-05	5.73435e-06	2.49644e-05	2.08657e-05	1.0089e-05	5.94101e-05	-3.40913e-05	7.29389e-05	7.34164e-05	7.38939e-05	7.43714e-05	7.48489e-05	7.53264e-05	7.58039e-05	7.62814e-05	7.67589e-05	7.72363e-05	7.77138e-05	7.81913e-05	7.86688e-05	7.91463e-05	7.96238e-05	8.01013e-05	8.05788e-05	8.10563e-05	8.15338e-05	8.20112e-05	8.24887e-05	4.35021e-05	-2.02394e-05	-2.87876e-05	3.13235e-07	1.73297e-05	-6.05558e-05	-1.41159e-05	4.07645e-05	9.21526e-05	4.02657e-05	8.59309e-06	-9.01455e-06	-7.9716e-07	-7.95217e-07	-0.000282777	-0.00062756	-0.000703853	0.000436254
390.412	0	-9.46142e-07	3.2168e-05	-7.10204e-05	1.56908e-05	-3.32054e-05	-3.53515e-06	2.3477e-06	2.69089e-05	-1.81985e-05	6.40736e-05	6.36411e-05	6.32086e-05	6.27761e-05	6.23436e-05	6.19111e-05	6.14786e-05	6.10461e-05	6.06136e-05	6.01811e-05	5.97486e-05	5.93162e-05	5.88837e-05	5.84512e-05	5.80187e-05	5.75862e-05	5.71537e-05	5.67212e-05	5.62887e-05	5.58562e-05	5.54237e-05	5.35808e-05	4.44807e-05	1.14379e-05	9.7755e-06	9.85121e-05	9.49003e-06	2.9548e-05	1.40207e-05	4.8023e-05	7.21859e-06	5.4593e-05	1.68216e-05	-2.05764e-05	-4.40741e-05	-0.000240619	-0.000604284	-0.000741824	0.000389737
391.053	0	1.89157e-05	5.39237e-06	-5.02775e-05	7.27078e-06	4.22083e-06	7.62925e-05	8.55721e-06	-1.36246e-05	-4.66079e-05	-1.21652e-05	-1.11685e-05	-1.01718e-05	-9.17508e-06	-8.17837e-06	-7.18166e-06	-6.18495e-06	-5.18824e-06	-4.19153e-06	-3.19482e-06	-2.19811e-06	-1.2014e-06	-2.04689e-07	7.9202e-07	1.78873e-06	2.78544e-06	3.78215e-06	4.77886e-06	5.77557e-06	6.77228e-06	8.15327e-06	2.09331e-05	0.000108242	4.40995e-05	-1.27767e-05	-4.82374e-06	1.10259e-05	3.06053e-05	3.93869e-05	2.94611e-05	4.32059e-05	2.06047e-05	-3.6521e-05	2.56857e-05	7.52746e-07	-0.000283774	-0.000584654	-0.000736864	0.000272222
391.695	0	4.50496e-05	-1.25595e-05	-3.41801e-05	-8.59095e-06	-2.48187e-05	1.02414e-05	-2.20903e-05	2.549e-05	1.6907e-05	-1.59522e-06	-8.27578e-08	1.42971e-06	2.94218e-06	4.45464e-06	5.96711e-06	7.47958e-06	8.99204e-06	1.05045e-05	1.2017e-05	1.35294e-05	1.50419e-05	1.65544e-05	1.80668e-05	1.95793e-05	2.10918e-05	2.26042e-05	2.41167e-05	2.56292e-05	2.71416e-05	2.83091e-05	2.52982e-05	1.61858e-06	-3.6824e-05	2.17791e-05	2.57402e-06	-8.02637e-06	2.79609e-05	5.26309e-05	3.73741e-05	1.62041e-05	-8.7651e-06	4.37227e-05	1.76371e-05	-3.77114e-05	-0.000241439	-0.000600327	-0.000634926	0.000288623
392.337	0	-1.4853e-05	4.84121e-06	-4.55936e-06	7.29869e-06	-1.0162e-05	-9.99672e-07	-1.87044e-05	4.51895e-06	-1.3465e-05	5.10441e-05	4.85657e-05	4.60874e-05	4.3609e-05	4.11307e-05	3.86523e-05	3.6174e-05	3.36956e-05	3.12173e-05	2.87389e-05	2.62606e-05	2.37822e-05	2.13039e-05	1.88255e-05	1.63472e-05	1.38688e-05	1.13905e-05	8.91212e-06	6.43377e-06	3.95541e-06	-8.32814e-07	-1.06169e-05	-3.47457e-06	1.04832e-05	-1.0763e-05	2.29676e-05	-1.39891e-05	-1.4968e-05	4.03139e-05	2.19602e-05	1.92618e-05	7.30667e-06	-2.66763e-05	-9.76168e-06	-6.72415e-05	-0.00031007	-0.00064653	-0.000633413	0.000283592
392.978	0	1.71082e-05	-2.62884e-05	4.04353e-06	3.74941e-05	-1.24766e-05	2.25602e-05	2.72869e-05	-4.65144e-05	-5.32326e-05	2.89066e-05	2.872e-05	2.85334e-05	2.83469e-05	2.81603e-05	2.79737e-05	2.77871e-05	2.76005e-05	2.7414e-05	2.72274e-05	2.70408e-05	2.68542e-05	2.66677e-05	2.64811e-05	2.62945e-05	2.61079e-05	2.59214e-05	2.57348e-05	2.55482e-05	2.53616e-05	-1.14679e-06	-2.0247e-05	6.66359e-06	2.26604e-05	2.14875e-05	-1.1401e-05	-5.08468e-06	3.82323e-06	1.09793e-05	5.1208e-05	7.22808e-05	4.94418e-05	-1.50391e-05	-4.12402e-05	-8.003e-05	-0.00028617	-0.000605966	-0.000590974	0.000282084
393.62	0	-8.15893e-06	-1.51002e-05	-2.57283e-05	-3.46291e-05	3.90775e-05	-3.83361e-06	8.15177e-06	6.488e-07	1.25317e-05	2.98541e-05	2.86512e-05	2.74484e-05	2.62455e-05	2.50426e-05	2.38397e-05	2.26368e-05	2.1434e-05	2.02311e-05	1.90282e-05	1.78253e-05	1.66224e-05	1.54196e-05	1.42167e-05	1.30138e-05	1.18109e-05	1.0608e-05	9.40516e-06	8.20228e-06	6.9994e-06	7.61435e-06	2.91887e-05	4.06163e-05	-1.34954e-05	-1.85012e-05	2.24623e-06	1.6853e-05	5.64148e-06	-1.07811e-05	8.24217e-06	5.37556e-05	4.09209e-05	2.71863e-05	3.43241e-05	-1.98606e-05	-0.000231205	-0.000564432	-0.000633621	0.000312431
394.262	0	1.4995e-05	-3.20756e-06	-6.55998e-06	1.53361e-05	9.45508e-06	-3.90811e-05	-1.07592e-06	2.30081e-05	-4.65377e-05	2.41783e-05	2.17695e-05	1.93608e-05	1.6952e-05	1.45432e-05	1.21345e-05	9.72575e-06	7.31699e-06	4.90824e-06	2.49949e-06	9.07393e-08	-2.31801e-06	-4.72676e-06	-7.13552e-06	-9.54427e-06	-1.1953e-05	-1.43618e-05	-1.67705e-05	-1.91793e-05	-2.1588e-05	4.53075e-05	5.83208e-05	-4.64156e-06	-3.00987e-05	1.64162e-05	-1.06613e-06	-1.15142e-05	-3.69586e-05	3.80963e-06	-5.85512e-06	-2.41535e-05	-3.34047e-05	2.21348e-07	3.48033e-05	-5.59653e-05	-0.000257512	-0.000567637	-0.000665887	0.000275685
394.904	0	1.49051e-05	-1.38941e-05	-1.25357e-05	-4.85112e-07	2.24394e-05	2.30362e-05	-2.69369e-05	-1.39783e-06	-1.74207e-05	-2.15039e-06	-4.07285e-06	-5.99531e-06	-7.91778e-06	-9.84024e-06	-1.17627e-05	-1.36852e-05	-1.56076e-05	-1.75301e-05	-1.94526e-05	-2.1375e-05	-2.32975e-05	-2.52199e-05	-2.71424e-05	-2.90649e-05	-3.09873e-05	-3.29098e-05	-3.48323e-05	-3.67547e-05	-3.86772e-05	-1.51976e-05	-5.15834e-05	-2.76274e-05	-3.01108e-05	-3.54926e-05	-2.03054e-05	-7.781e-06	2.20942e-05	5.16731e-05	1.30374e-05	-5.76663e-05	-5.59206e-05	-2.32035e-05	-8.87646e-06	-9.15217e-05	-0.000304233	-0.00061328	-0.000669203	0.000221341
395.546	0	7.95646e-06	-2.25842e-05	-5.54362e-05	5.03426e-05	-1.96646e-06	4.66841e-06	4.4642e-05	-3.49148e-05	-3.12748e-05	3.95542e-05	3.8266e-05	3.69778e-05	3.56897e-05	3.44015e-05	3.31133e-05	3.18251e-05	3.0537e-05	2.92488e-05	2.79606e-05	2.66724e-05	2.53843e-05	2.40961e-05	2.28079e-05	2.15197e-05	2.02316e-05	1.89434e-05	1.76552e-05	1.6367e-05	1.50789e-05	1.01378e-05	1.51328e-05	2.65715e-05	-4.34324e-06	1.42635e-05	-2.35866e-05	6.50565e-06	-2.03443e-06	2.6203e-05	2.38812e-05	-5.99118e-06	5.59772e-05	5.89924e-06	-2.78507e-05	-7.87073e-05	-0.00026029	-0.000586832	-0.000704933	0.000209756
396.188	0	9.24987e-06	-7.39377e-06	-5.12582e-05	3.33877e-05	3.91282e-05	3.31503e-05	-1.07987e-06	-2.18992e-05	-5.84186e-05	2.51365e-05	2.42102e-05	2.32838e-05	2.23575e-05	2.14311e-05	2.05047e-05	1.95784e-05	1.8652e-05	1.77257e-05	1.67993e-05	1.58729e-05	1.49466e-05	1.40202e-05	1.30939e-05	1.21675e-05	1.12412e-05	1.03148e-05	9.38844e-06	8.46209e-06	7.53573e-06	-3.2809e-05	-1.55553e-05	-1.89179e-05	3.40707e-05	2.26418e-05	-3.41884e-05	4.22067e-05	-2.12645e-05	9.02396e-05	4.03104e-05	2.9838e-05	-2.5748e-05	1.13666e-05	-1.94352e-05	-6.31781e-05	-0.000169572	-0.000582748	-0.000777679	0.000105568
396.83	0	-6.31454e-07	1.15278e-05	-9.12386e-06	9.99476e-06	1.66124e-05	2.89377e-05	1.30876e-05	-1.46969e-05	-7.48821e-05	2.1938e-05	2.09859e-05	2.00338e-05	1.90816e-05	1.81295e-05	1.71774e-05	1.62253e-05	1.52732e-05	1.43211e-05	1.3369e-05	1.24169e-05	1.14648e-05	1.05127e-05	9.56061e-06	8.6085e-06	7.6564e-06	6.7043e-06	5.75219e-06	4.80009e-06	1.06553e-06	-2.55789e-05	-3.86291e-05	4.48855e-05	-3.74584e-05	2.5631e-05	-1.14654e-05	-1.62574e-05	-5.27359e-05	1.95723e-07	-1.15516e-06	2.51833e-06	1.04696e-05	-1.88443e-05	-3.4757e-05	-1.87365e-05	-0.000244108	-0.000605326	-0.000681916	0.000149265
397.472	0	-1.88794e-05	-4.34382e-05	-3.78537e-05	3.51367e-05	-4.15401e-06	1.55733e-05	-2.12957e-05	-6.54419e-06	1.12424e-05	7.65358e-05	7.30999e-05	6.9664e-05	6.62281e-05	6.27923e-05	5.93564e-05	5.59205e-05	5.24846e-05	4.90487e-05	4.56128e-05	4.2177e-05	3.87411e-05	3.53052e-05	3.18693e-05	2.84334e-05	2.49975e-05	2.15616e-05	1.81258e-05	1.46899e-05	5.6082e-06	-1.24992e-05	8.75488e-06	2.45638e-05	1.15349e-05	1.16629e-05	-3.49422e-06	2.48704e-05	1.40951e-05	8.35753e-05	6.1781e-05	5.66375e-05	-7.29621e-06	-1.04774e-05	-1.1302e-05	-3.76985e-05	-0.000223372	-0.000518519	-0.000587975	0.000235127
398.114	0	2.55511e-06	1.24343e-05	1.41428e-05	-4.24205e-05	-2.99906e-05	1.14978e-05	-2.51498e-06	2.66688e-05	-6.90417e-06	1.73286e-05	1.70744e-05	1.68202e-05	1.6566e-05	1.63119e-05	1.60577e-05	1.58035e-05	1.55493e-05	1.52952e-05	1.5041e-05	1.47868e-05	1.45326e-05	1.42785e-05	1.40243e-05	1.37701e-05	1.35159e-05	1.32618e-05	1.30076e-05	1.27534e-05	3.30653e-06	-3.63138e-05	-6.26186e-05	-2.51991e-05	-8.92459e-06	-1.57593e-05	-3.79238e-05	-2.0445e-05	3.36933e-06	3.79286e-05	-1.86101e-05	-9.2191e-06	1.74045e-05	-1.38517e-05	-2.77239e-05	-5.78938e-05	-0.000289308	-0.000554274	-0.000616851	0.000279325
398.757	0	-4.75759e-05	-2.18e-05	-9.30729e-08	1.50357e-05	1.32042e-05	2.16007e-05	1.57487e-05	7.39658e-06	-1.90339e-05	3.99978e-05	4.00162e-05	4.00346e-05	4.0053e-05	4.00714e-05	4.00898e-05	4.01082e-05	4.01266e-05	4.0145e-05	4.01634e-05	4.01818e-05	4.02002e-05	4.02186e-05	4.0237e-05	4.02554e-05	4.02738e-05	4.02922e-05	4.03106e-05	4.0329e-05	8.80118e-06	-2.9906e-06	2.71022e-05	8.84885e-06	-7.84667e-06	-2.04875e-05	-2.86983e-05	-2.63496e-06	6.88415e-05	6.4909e-05	3.46725e-07	3.32868e-05	3.075e-05	2.61189e-05	2.76249e-05	-3.92631e-05	-0.000233507	-0.000545131	-0.000605037	0.000302395
399.399	0	5.99977e-06	-4.28616e-05	-1.73401e-05	-6.83918e-06	2.33718e-05	4.35319e-05	-2.91818e-05	-1.81419e-05	-1.6033e-05	5.30092e-05	5.06351e-05	4.82609e-05	4.58868e-05	4.35126e-05	4.11385e-05	3.87644e-05	3.63902e-05	3.40161e-05	3.16419e-05	2.92678e-05	2.68936e-05	2.45195e-05	2.21453e-05	1.97712e-05	1.73971e-05	1.50229e-05	1.26488e-05	1.02746e-05	2.55341e-05	2.46193e-06	-1.12167e-05	-4.2817e-06	-1.81295e-07	-2.74249e-05	9.53673e-07	2.85625e-05	6.89664e-05	7.744e-05	4.79899e-05	1.37591e-05	-2.99391e-06	5.89134e-06	-1.91978e-05	-8.21095e-05	-0.000261526	-0.000570755	-0.000612406	0.00036825
400.041	0	-4.62031e-06	-3.04333e-05	-6.20257e-06	1.03041e-05	-1.21193e-05	1.96969e-05	3.13461e-05	3.31928e-06	-2.40625e-05	1.69579e-05	1.72504e-05	1.75428e-05	1.78352e-05	1.81276e-05	1.842e-05	1.87124e-05	1.90048e-05	1.92972e-05	1.95896e-05	1.9882e-05	2.01744e-05	2.04668e-05	2.07592e-05	2.10516e-05	2.1344e-05	2.16364e-05	2.19288e-05	2.22212e-05	-6.03323e-06	-6.82138e-05	-4.31015e-05	4.77653e-06	4.8266e-05	-5.27025e-06	-1.49414e-05	-5.64031e-06	4.84084e-05	3.72186e-05	5.2075e-05	3.70891e-05	4.71327e-06	1.39285e-05	8.20984e-06	-1.8584e-05	-0.000212758	-0.000562895	-0.000646618	0.000316036
400.684	0	1.63167e-05	-2.67544e-05	-4.05463e-05	-3.7461e-05	8.95784e-06	4.18835e-05	1.4945e-05	-5.76203e-06	-3.36376e-05	5.18758e-05	4.86597e-05	4.54435e-05	4.22274e-05	3.90113e-05	3.57952e-05	3.2579e-05	2.93629e-05	2.61468e-05	2.29307e-05	1.97145e-05	1.64984e-05	1.32823e-05	1.00662e-05	6.85005e-06	3.63393e-06	4.17805e-07	-2.79832e-06	-6.01444e-06	-1.72119e-05	1.71342e-06	-2.51512e-05	-2.75624e-05	-8.00374e-06	-3.60326e-05	-5.38079e-06	-2.92363e-05	2.2964e-05	3.15693e-06	-1.39086e-05	6.76395e-06	2.92455e-05	7.25318e-06	-5.96481e-06	-5.36605e-05	-0.000284509	-0.000587761	-0.000678594	0.000322222
401.326	0	6.28169e-06	-2.14827e-05	-5.49858e-06	3.5301e-05	2.6033e-05	1.70098e-05	-1.41218e-05	-5.63712e-05	-4.95779e-05	5.2139e-05	4.81211e-05	4.41032e-05	4.00853e-05	3.60674e-05	3.20494e-05	2.80315e-05	2.40136e-05	1.99957e-05	1.59778e-05	1.19599e-05	7.94195e-06	3.92404e-06	-9.38747e-08	-4.11179e-06	-8.1297e-06	-1.21476e-05	-1.61655e-05	-2.01834e-05	3.44709e-07	-8.71452e-06	2.86021e-05	5.32145e-05	9.11326e-06	-6.08968e-05	3.84322e-05	-4.57478e-06	3.89507e-05	2.75281e-05	2.30617e-05	1.68814e-05	-4.25037e-05	6.98189e-06	2.48456e-05	-2.50205e-05	-0.000177797	-0.000554267	-0.000657291	0.000234048
401.969	0	1.96554e-05	5.01524e-06	-2.7667e-05	8.21352e-06	-1.78273e-05	9.05395e-06	1.47849e-06	4.87175e-06	-2.80589e-05	1.59371e-05	1.41677e-05	1.23982e-05	1.06288e-05	8.8593e-06	7.08984e-06	5.32039e-06	3.55093e-06	1.78147e-06	1.20108e-08	-1.75745e-06	-3.52691e-06	-5.29636e-06	-7.06582e-06	-8.83528e-06	-1.06047e-05	-1.23742e-05	-1.41437e-05	-1.59131e-05	1.65893e-05	5.34819e-06	-6.3944e-06	-2.8832e-05	4.71566e-06	4.13087e-06	-6.97943e-06	-4.07597e-06	1.52903e-05	-8.74213e-06	4.73139e-05	-9.41714e-06	1.02497e-05	-3.26134e-05	-1.52747e-05	-6.39355e-05	-0.000191336	-0.000542978	-0.000707443	0.00013376
402.612	0	-1.04301e-05	-1.97669e-06	3.44753e-05	9.01829e-06	-1.09234e-05	-3.23364e-06	6.95083e-06	3.17819e-06	-2.98413e-05	1.23636e-05	1.31661e-05	1.39687e-05	1.47712e-05	1.55738e-05	1.63763e-05	1.71789e-05	1.79814e-05	1.87839e-05	1.95865e-05	2.0389e-05	2.11916e-05	2.19941e-05	2.27966e-05	2.35992e-05	2.44017e-05	2.52043e-05	2.60068e-05	2.45204e-05	2.94958e-06	-4.36052e-06	1.4066e-05	-6.76832e-06	6.3372e-06	-1.88439e-05	5.72589e-06	-2.8484e-05	3.33346e-05	1.9327e-05	4.01139e-05	-2.66142e-05	-3.80425e-06	-5.53643e-05	1.96421e-05	-1.12156e-05	-0.000186004	-0.000507687	-0.000580521	0.000140513
403.254	0	1.07771e-05	3.15362e-06	-7.75736e-06	-7.21517e-06	-8.23265e-06	1.99754e-05	1.02745e-05	1.83964e-06	-5.93363e-06	-3.11322e-05	-3.15056e-05	-3.18791e-05	-3.22526e-05	-3.26261e-05	-3.29996e-05	-3.3373e-05	-3.37465e-05	-3.412e-05	-3.44935e-05	-3.48669e-05	-3.52404e-05	-3.56139e-05	-3.59874e-05	-3.63609e-05	-3.67343e-05	-3.71078e-05	-3.74813e-05	-3.1719e-05	-4.78877e-06	-7.90333e-06	-6.20497e-05	-1.85715e-05	2.07894e-05	-5.52633e-05	-6.24659e-05	-2.89423e-05	-1.11673e-05	1.36677e-05	1.05784e-05	-8.63995e-06	-2.71065e-05	-5.21555e-05	-3.37692e-05	-5.27951e-05	-0.000221109	-0.000521777	-0.000638513	0.000120977
403.897	0	-1.87347e-05	1.26854e-05	-1.56752e-05	-1.78914e-05	1.61905e-05	4.07619e-05	-1.52338e-05	6.92868e-06	-1.59932e-05	3.2828e-05	3.39348e-05	3.50416e-05	3.61484e-05	3.72552e-05	3.83619e-05	3.94687e-05	4.05755e-05	4.16823e-05	4.27891e-05	4.38959e-05	4.50027e-05	4.61094e-05	4.72162e-05	4.8323e-05	4.94298e-05	5.05366e-05	5.16434e-05	4.65097e-05	1.19799e-05	-2.95251e-05	2.1344e-06	3.74812e-05	1.72289e-05	1.51367e-06	5.24238e-06	-5.61524e-06	2.82039e-05	2.25415e-05	1.01733e-05	-8.18977e-06	3.09923e-05	8.67938e-06	1.68873e-05	-3.32066e-05	-0.000227815	-0.000550035	-0.000552171	0.00022708
404.54	0	1.02286e-06	-2.29502e-05	3.54979e-07	1.82194e-05	5.19427e-06	5.02301e-06	-5.33837e-06	2.71067e-05	-2.09653e-06	-2.90219e-05	-2.70876e-05	-2.51532e-05	-2.32188e-05	-2.12844e-05	-1.935e-05	-1.74156e-05	-1.54812e-05	-1.35468e-05	-1.16124e-05	-9.67798e-06	-7.74359e-06	-5.80919e-06	-3.87479e-06	-1.9404e-06	-5.99944e-09	1.9284e-06	3.86279e-06	3.77458e-05	5.51701e-05	7.12027e-06	3.18761e-06	4.49444e-06	-1.05847e-05	2.64627e-06	-2.43551e-06	6.66208e-06	4.84365e-05	-7.6557e-06	-1.13033e-05	1.82359e-05	4.88173e-05	3.64258e-05	9.75651e-06	-3.27606e-05	-0.000197834	-0.000473169	-0.000519217	0.000226149
405.183	0	-2.86719e-05	-1.28478e-05	-6.04035e-07	-1.82524e-05	1.01843e-05	1.91674e-05	1.56906e-06	-6.71294e-06	1.53205e-05	3.38071e-05	3.25623e-05	3.13174e-05	3.00726e-05	2.88277e-05	2.75829e-05	2.6338e-05	2.50932e-05	2.38483e-05	2.26034e-05	2.13586e-05	2.01137e-05	1.88689e-05	1.7624e-05	1.63792e-05	1.51343e-05	1.38895e-05	1.26446e-05	4.217e-05	3.27016e-05	2.11815e-05	1.98104e-05	2.09898e-05	1.83591e-05	3.7781e-06	5.73209e-06	3.62855e-05	3.32739e-05	4.23144e-05	3.97593e-05	-1.4343e-05	-2.00799e-05	1.0917e-05	2.04531e-05	-1.165e-05	-0.000205226	-0.000478521	-0.000591724	0.000200313
405.826	0	1.29268e-05	-3.00801e-05	6.69756e-06	-4.37625e-05	-1.99642e-05	1.82199e-05	2.60025e-05	3.0945e-05	-1.74988e-05	2.29793e-06	1.97709e-06	1.65625e-06	1.33541e-06	1.01457e-06	6.9373e-07	3.7289e-07	5.20503e-08	-2.6879e-07	-5.89629e-07	-9.10469e-07	-1.23131e-06	-1.55215e-06	-1.87299e-06	-2.19383e-06	-2.51467e-06	-2.83551e-06	-3.15635e-06	2.20249e-05	4.10295e-07	5.02628e-06	1.44469e-05	3.52125e-05	1.17547e-05	-5.27812e-06	3.70896e-06	2.39187e-05	3.42923e-05	4.56457e-05	1.47679e-05	2.88272e-05	4.37083e-05	4.1396e-05	2.87365e-05	-8.63227e-06	-0.000195822	-0.000442175	-0.00055605	0.000280508
406.469	0	-2.21621e-05	-4.27308e-05	-3.24287e-06	2.24785e-05	4.66528e-06	1.79549e-05	-2.2909e-05	1.446e-05	-1.219e-05	5.11909e-05	4.91214e-05	4.70519e-05	4.49825e-05	4.2913e-05	4.08435e-05	3.8774e-05	3.67045e-05	3.4635e-05	3.25655e-05	3.0496e-05	2.84265e-05	2.6357e-05	2.42876e-05	2.22181e-05	2.01486e-05	1.80791e-05	1.60096e-05	-1.78309e-05	-1.94759e-05	-4.51902e-06	-2.41083e-05	2.65996e-05	-2.77384e-05	3.73923e-07	-3.557e-07	-1.96205e-06	-1.90217e-05	4.45856e-06	1.62496e-06	-1.14827e-06	1.26039e-05	2.44491e-06	2.8508e-05	-2.64277e-06	-0.000248526	-0.000450544	-0.000595263	0.000228849
407.112	0	-2.51557e-05	-2.79921e-05	-4.91479e-06	8.84767e-06	-4.48978e-06	1.4457e-05	-2.42534e-05	9.60588e-06	2.89745e-05	5.13183e-05	5.19707e-05	5.2623e-05	5.32753e-05	5.39276e-05	5.458e-05	5.52323e-05	5.58846e-05	5.6537e-05	5.71893e-05	5.78416e-05	5.8494e-05	5.91463e-05	5.97986e-05	6.0451e-05	6.11033e-05	6.17556e-05	6.2408e-05	5.52927e-05	4.38906e-06	6.0728e-06	5.52984e-06	6.79278e-05	-1.61353e-05	-8.57348e-07	-4.32203e-06	3.72637e-05	6.13923e-05	7.11845e-05	4.12364e-05	7.58769e-07	-7.33699e-06	2.92483e-06	-4.94495e-05	-2.11587e-05	-0.000233238	-0.000463128	-0.000610027	0.000161704
407.755	0	1.39007e-05	-3.2358e-05	-2.25471e-05	-1.44865e-05	1.87585e-05	5.48336e-06	-1.69635e-05	-1.70204e-05	2.72338e-06	4.26314e-05	3.87053e-05	3.47792e-05	3.08531e-05	2.6927e-05	2.30009e-05	1.90749e-05	1.51488e-05	1.12227e-05	7.29658e-06	3.37049e-06	-5.55603e-07	-4.48169e-06	-8.40779e-06	-1.23339e-05	-1.626e-05	-2.01861e-05	-2.41122e-05	1.23439e-05	-2.65565e-05	2.17989e-05	-9.9318e-07	8.86608e-06	-1.605e-06	2.94258e-05	5.60852e-06	3.51951e-06	3.74517e-05	3.46252e-06	1.57999e-05	5.00083e-06	1.10313e-05	-9.25259e-06	1.41852e-05	2.79455e-05	-0.000170108	-0.000430291	-0.000640499	6.74824e-05
408.398	0	1.7011e-06	-3.7381e-05	8.09897e-07	-6.83342e-06	2.16007e-05	1.98652e-05	-2.11354e-05	-1.04496e-05	-4.3484e-06	4.54474e-05	4.62669e-05	4.70865e-05	4.7906e-05	4.87255e-05	4.95451e-05	5.03646e-05	5.11841e-05	5.20036e-05	5.28232e-05	5.36427e-05	5.44622e-05	5.52818e-05	5.61013e-05	5.69208e-05	5.77404e-05	5.85599e-05	5.88003e-05	3.83562e-05	-5.98993e-05	-3.28465e-06	-8.49124e-06	-2.8327e-05	-2.19157e-05	5.08183e-06	-5.64726e-06	2.27373e-06	1.37825e-05	3.36335e-05	-1.58516e-05	-5.36012e-05	1.41874e-05	2.49514e-05	-2.62593e-05	-1.71349e-05	-0.000218286	-0.000416041	-0.000651181	-2.50042e-05
409.042	0	-3.07744e-05	-1.1718e-05	-2.3148e-05	-1.42958e-05	2.52306e-05	4.14526e-05	-7.1267e-06	4.01901e-06	-1.57015e-06	2.50121e-05	2.2291e-05	1.95699e-05	1.68488e-05	1.41277e-05	1.14066e-05	8.68548e-06	5.96438e-06	3.24329e-06	5.22193e-07	-2.1989e-06	-4.92e-06	-7.6411e-06	-1.03622e-05	-1.30833e-05	-1.58044e-05	-1.85255e-05	-1.27222e-05	3.58024e-05	-9.35487e-07	-5.36418e-06	3.77086e-05	-1.17878e-05	-3.57079e-05	2.30894e-05	-2.32123e-05	2.42103e-05	1.1118e-05	-1.80328e-05	-6.17705e-06	2.38715e-05	2.61887e-05	4.07636e-05	-1.24587e-05	-8.40783e-06	-0.000168087	-0.000386216	-0.000578936	2.76862e-05
409.685	0	-3.14206e-05	-1.54446e-05	4.97871e-06	2.58742e-05	-9.35431e-06	-9.0333e-06	-2.0005e-05	-5.50543e-06	2.50234e-05	5.34837e-05	5.13308e-05	4.9178e-05	4.70251e-05	4.48723e-05	4.27194e-05	4.05665e-05	3.84137e-05	3.62608e-05	3.4108e-05	3.19551e-05	2.98022e-05	2.76494e-05	2.54965e-05	2.33437e-05	2.11908e-05	1.90379e-05	7.75274e-06	-2.07199e-05	-2.41161e-06	2.36614e-05	2.82821e-05	8.06843e-06	1.60044e-05	1.15387e-05	-1.61153e-06	5.50858e-05	5.19086e-05	2.41594e-05	2.30153e-05	1.21942e-05	2.51832e-05	2.542e-05	1.23685e-05	-2.97593e-05	-0.000190706	-0.000399071	-0.000520693	2.68942e-05
410.329	0	6.23677e-06	-2.30076e-05	-5.07516e-06	-2.27752e-05	1.63321e-05	4.17566e-05	-1.52983e-05	6.96884e-06	-1.69429e-05	8.96582e-06	9.59623e-06	1.02266e-05	1.08571e-05	1.14875e-05	1.21179e-05	1.27483e-05	1.33787e-05	1.40091e-05	1.46395e-05	1.52699e-05	1.59004e-05	1.65308e-05	1.71612e-05	1.77916e-05	1.8422e-05	1.90524e-05	1.14302e-05	-1.35869e-05	-2.73623e-05	-8.7522e-06	9.06818e-06	-1.67461e-05	-2.38549e-05	3.09687e-05	2.1238e-05	2.17827e-05	2.07942e-05	1.92795e-05	3.89602e-06	1.27872e-06	-2.23304e-06	5.30115e-06	-2.12696e-05	-2.7893e-05	-0.000142817	-0.000407465	-0.000573793	5.8624e-05
410.972	0	3.34802e-05	-2.37875e-05	-2.55204e-05	-9.19157e-06	1.34813e-05	2.57559e-05	-1.87358e-05	-9.41713e-06	-2.20915e-05	2.09264e-05	2.0588e-05	2.02497e-05	1.99113e-05	1.95729e-05	1.92346e-05	1.88962e-05	1.85578e-05	1.82194e-05	1.78811e-05	1.75427e-05	1.72043e-05	1.6866e-05	1.65276e-05	1.61892e-05	1.58508e-05	1.55125e-05	3.21187e-05	1.66704e-05	-1.00454e-05	-1.16753e-05	-3.31713e-05	-3.13184e-05	-3.62373e-05	-1.46936e-06	9.51268e-07	-2.1625e-06	1.30221e-06	1.68062e-05	-2.54949e-05	-3.625e-05	4.94124e-06	3.26716e-05	2.81719e-05	-1.40789e-05	-0.000166391	-0.00042602	-0.000533256	9.71854e-05
411.616	0	7.08315e-06	-2.33898e-05	-3.04396e-05	-4.38778e-06	1.2796e-05	2.55683e-05	1.53431e-05	-3.48579e-07	-2.89722e-05	1.75905e-05	1.59715e-05	1.43524e-05	1.27333e-05	1.11142e-05	9.49516e-06	7.87608e-06	6.25701e-06	4.63793e-06	3.01886e-06	1.39978e-06	-2.19291e-07	-1.83837e-06	-3.45744e-06	-5.07652e-06	-6.69559e-06	-8.31467e-06	-6.05404e-06	-2.91434e-05	-2.13511e-05	6.19067e-06	2.02158e-05	-8.26793e-07	-8.76882e-06	2.16918e-05	5.47659e-05	5.23159e-05	1.69277e-05	-1.10729e-06	-2.90712e-06	-4.45317e-06	-7.87055e-06	-8.11515e-06	-4.19609e-06	-4.87382e-05	-0.000180087	-0.000417277	-0.000563867	5.28049e-05
412.259	0	1.77113e-05	6.13939e-06	-6.31702e-06	-2.39718e-05	6.80794e-06	-4.57274e-06	-2.92015e-05	-3.68588e-06	-1.42127e-05	2.9464e-05	2.53037e-05	2.11434e-05	1.69831e-05	1.28228e-05	8.66251e-06	4.5022e-06	3.41894e-07	-3.81841e-06	-7.97872e-06	-1.2139e-05	-1.62993e-05	-2.04596e-05	-2.46199e-05	-2.87802e-05	-3.29406e-05	-3.71009e-05	-1.52499e-07	-2.05313e-06	1.62663e-05	-1.2216e-05	-1.09036e-05	-1.70424e-06	8.55869e-06	7.18686e-06	-1.24625e-05	9.22044e-06	1.16724e-05	-1.32617e-05	9.45154e-06	9.26734e-06	-7.96688e-06	1.03318e-05	5.12046e-06	-6.98875e-05	-0.000185493	-0.000427731	-0.000585233	5.21704e-05
412.903	0	-1.75767e-05	-3.28255e-05	-8.89948e-06	2.8933e-05	2.54267e-05	6.67843e-06	-9.34064e-06	6.20676e-06	-6.94631e-07	8.66759e-06	8.77247e-06	8.87735e-06	8.98222e-06	9.0871e-06	9.19198e-06	9.29686e-06	9.40174e-06	9.50662e-06	9.6115e-06	9.71637e-06	9.82125e-06	9.92613e-06	1.0031e-05	1.01359e-05	1.02408e-05	1.03456e-05	6.44306e-06	2.71056e-05	2.13989e-05	-1.39628e-05	2.34778e-05	-2.31786e-05	2.02589e-05	3.00573e-05	3.01026e-05	4.6699e-05	4.3249e-05	1.69158e-05	-9.83251e-07	-4.0586e-05	1.53622e-05	3.42054e-05	5.04667e-05	-4.5516e-05	-0.000149186	-0.000385034	-0.00055834	7.16602e-05
413.547	0	-1.41732e-05	-2.71349e-05	-2.69457e-05	-3.44853e-06	-8.91846e-06	5.93873e-06	1.97134e-05	2.14006e-05	1.12725e-05	2.87265e-05	2.73411e-05	2.59556e-05	2.45702e-05	2.31848e-05	2.17993e-05	2.04139e-05	1.90285e-05	1.7643e-05	1.62576e-05	1.48722e-05	1.34868e-05	1.21013e-05	1.07159e-05	9.33046e-06	7.94503e-06	6.5596e-06	-1.75854e-05	-2.06527e-05	-1.89209e-05	3.69242e-05	-7.11278e-06	-3.49242e-05	4.54242e-06	-5.10469e-06	5.77688e-05	3.78613e-05	4.08473e-05	3.66078e-05	-1.46864e-05	-1.97713e-05	2.42033e-05	-9.10785e-06	3.54107e-05	-5.93878e-06	-0.000128511	-0.000431303	-0.000586276	-1.54061e-05
414.19	0	-8.77183e-06	-3.97428e-05	-2.48088e-05	-4.23342e-05	9.71158e-06	3.84379e-05	-1.23106e-05	3.1995e-05	1.81883e-05	7.40924e-06	4.12905e-06	8.48853e-07	-2.43134e-06	-5.71154e-06	-8.99173e-06	-1.22719e-05	-1.55521e-05	-1.88323e-05	-2.21125e-05	-2.53927e-05	-2.86729e-05	-3.19531e-05	-3.52333e-05	-3.85135e-05	-4.17937e-05	-4.50739e-05	1.82891e-05	-1.4153e-05	-2.38928e-05	-5.18355e-06	5.33855e-05	-6.3763e-06	-3.50646e-05	2.0112e-05	2.78254e-05	4.14269e-05	-3.03e-07	7.52921e-06	1.17146e-05	-2.00741e-06	-3.74592e-06	2.17393e-06	3.84205e-05	-3.60789e-05	-0.000152745	-0.000472143	-0.000681481	-6.87589e-05
414.834	0	1.46983e-05	-1.49388e-05	-1.83393e-05	-2.17239e-05	-1.32902e-05	4.35376e-06	1.01175e-05	8.30198e-06	-1.58392e-07	1.91269e-05	1.77955e-05	1.64642e-05	1.51328e-05	1.38014e-05	1.24701e-05	1.11387e-05	9.80731e-06	8.47594e-06	7.14457e-06	5.8132e-06	4.48183e-06	3.15046e-06	1.81909e-06	4.87716e-07	-8.43655e-07	-1.73314e-06	3.97649e-05	-2.30526e-05	-4.65658e-06	-3.19218e-06	2.07539e-05	-2.32927e-05	2.1206e-05	-1.29487e-05	1.92309e-05	1.4268e-05	-3.33874e-06	-2.64473e-05	3.6239e-06	2.32531e-05	-4.40252e-07	-1.16867e-06	2.74971e-05	-5.50293e-05	-6.42724e-05	-0.000431258	-0.000646755	-0.000132242
415.478	0	-2.57403e-05	-3.49133e-05	-3.74703e-05	-2.48216e-05	1.43873e-05	2.70502e-05	5.56174e-06	2.24724e-05	3.0904e-05	3.77337e-05	3.66344e-05	3.55351e-05	3.44358e-05	3.33365e-05	3.22372e-05	3.11379e-05	3.00385e-05	2.89392e-05	2.78399e-05	2.67406e-05	2.56413e-05	2.4542e-05	2.34427e-05	2.23434e-05	2.1244e-05	2.65568e-05	7.13797e-05	-7.56572e-06	-2.21631e-05	1.25114e-05	7.07208e-05	-8.96237e-06	2.61366e-05	4.00563e-05	5.16759e-05	2.84116e-05	2.09149e-05	3.24152e-05	2.6561e-05	-1.66342e-05	4.00567e-05	1.47906e-05	-1.47023e-05	-5.7123e-06	-0.000107784	-0.000355919	-0.00053883	-1.49769e-05
416.122	0	7.11854e-06	-2.3711e-06	-1.26877e-05	-9.02415e-06	1.56325e-06	1.57395e-06	-1.84808e-05	-1.54288e-05	9.21724e-06	3.62728e-05	3.41449e-05	3.2017e-05	2.98892e-05	2.77613e-05	2.56334e-05	2.35056e-05	2.13777e-05	1.92499e-05	1.7122e-05	1.49941e-05	1.28663e-05	1.07384e-05	8.61054e-06	6.48268e-06	4.35482e-06	6.58845e-06	1.83539e-05	3.37565e-06	8.63958e-06	6.04963e-06	-5.02428e-07	-3.53465e-05	2.42441e-07	-3.69585e-05	-7.17285e-06	1.70491e-05	1.90991e-05	-8.38114e-06	1.11828e-05	-1.49892e-05	2.31488e-05	-6.51962e-06	2.46888e-05	-5.03016e-05	-0.000130763	-0.000409827	-0.000552138	-4.25585e-05
416.766	0	6.79222e-06	-1.54458e-05	3.74151e-06	1.6964e-05	-9.98965e-06	-1.57459e-05	-6.76305e-06	1.37651e-05	-6.84364e-06	1.1802e-05	1.20576e-05	1.23131e-05	1.25686e-05	1.28242e-05	1.30797e-05	1.33353e-05	1.35908e-05	1.38463e-05	1.41019e-05	1.43574e-05	1.46129e-05	1.48685e-05	1.5124e-05	1.53796e-05	1.56351e-05	1.5257e-05	1.35902e-05	2.49593e-05	4.83749e-05	1.81468e-05	-1.34757e-05	3.88504e-06	7.00805e-06	1.23554e-05	2.66854e-05	3.84551e-05	3.03003e-05	2.31306e-05	2.60855e-05	2.40909e-05	2.92592e-05	3.57146e-05	1.10214e-05	-3.44669e-05	-0.000101171	-0.000395554	-0.000511266	4.32702e-05
417.41	0	-7.61064e-06	-4.03125e-05	-1.23826e-05	-1.80418e-05	-2.54516e-05	2.67491e-05	1.45886e-05	5.22812e-06	1.13076e-05	3.34876e-05	3.03463e-05	2.7205e-05	2.40637e-05	2.09224e-05	1.7781e-05	1.46397e-05	1.14984e-05	8.35711e-06	5.21579e-06	2.07448e-06	-1.06683e-06	-4.20815e-06	-7.34946e-06	-1.04908e-05	-1.36321e-05	-3.52709e-07	7.23813e-06	-8.96094e-06	2.19556e-06	9.51711e-06	-7.01992e-06	-4.05734e-05	1.99431e-05	1.91515e-05	3.44062e-06	9.43513e-06	5.68856e-06	9.76048e-06	-1.14984e-05	-3.39378e-05	-7.64651e-06	-2.15798e-05	-2.93695e-06	-2.90248e-05	-0.000124908	-0.000359576	-0.000520119	7.09714e-05
418.055	0	-2.92754e-05	-2.16546e-05	-9.95985e-06	-5.31264e-06	3.03794e-05	3.59202e-05	2.57513e-06	-5.43609e-06	-1.59237e-05	3.38296e-05	3.23832e-05	3.09368e-05	2.94905e-05	2.80441e-05	2.65978e-05	2.51514e-05	2.3705e-05	2.22587e-05	2.08123e-05	1.9366e-05	1.79196e-05	1.64732e-05	1.50269e-05	1.35805e-05	1.21342e-05	-7.18735e-06	-3.74656e-05	-2.97111e-05	-5.96489e-06	7.47174e-06	7.98019e-06	4.30228e-06	5.45935e-06	2.87989e-05	4.89373e-05	3.22944e-05	-1.69659e-06	-2.43251e-06	9.2694e-06	-1.43772e-05	3.60531e-06	1.25426e-05	1.00256e-06	-1.44e-05	-0.000140969	-0.000406852	-0.000535452	0.000109685
418.699	0	-4.2865e-07	-3.69557e-05	-3.23204e-05	-3.51043e-06	5.71063e-06	2.85502e-05	5.77597e-06	6.1394e-06	6.41472e-06	2.6171e-05	2.6377e-05	2.65831e-05	2.67891e-05	2.69952e-05	2.72012e-05	2.74072e-05	2.76133e-05	2.78193e-05	2.80253e-05	2.82314e-05	2.84374e-05	2.86434e-05	2.88495e-05	2.90555e-05	2.92615e-05	3.40151e-05	2.17737e-05	-3.98385e-06	1.19048e-05	3.33625e-05	1.95559e-05	-7.9297e-06	-7.32778e-06	3.80974e-05	4.97505e-05	2.47874e-05	9.35706e-06	2.14438e-05	5.93938e-06	-2.47505e-05	-1.84241e-05	-4.16652e-06	-1.26581e-05	-7.64928e-06	-0.000149635	-0.000403866	-0.000539374	7.76016e-05
419.343	0	-7.92508e-07	-3.14606e-05	-4.0499e-05	-9.27789e-06	3.44627e-05	2.37775e-05	-1.68363e-06	-1.75256e-05	-3.18685e-06	3.48124e-05	3.14961e-05	2.81798e-05	2.48635e-05	2.15473e-05	1.8231e-05	1.49147e-05	1.15985e-05	8.2822e-06	4.96593e-06	1.64966e-06	-1.66661e-06	-4.98288e-06	-8.29915e-06	-1.16154e-05	-1.49317e-05	3.26117e-05	9.89922e-06	1.26945e-05	1.8936e-05	1.12931e-05	-2.79286e-05	6.28786e-06	1.57138e-05	3.16226e-05	2.81474e-05	3.97748e-05	2.38552e-05	-3.1873e-06	-3.82939e-07	9.0659e-06	1.79748e-05	1.28587e-05	-4.37794e-06	-7.85677e-06	-0.000113668	-0.000362042	-0.000531754	7.35685e-05
419.988	0	-1.27746e-06	3.59057e-06	1.97815e-06	-9.28195e-06	-2.57042e-05	-4.20048e-06	7.64768e-06	1.917e-05	-4.05816e-06	5.26555e-06	3.23934e-06	1.21312e-06	-8.13089e-07	-2.8393e-06	-4.86551e-06	-6.89173e-06	-8.91794e-06	-1.09442e-05	-1.29704e-05	-1.49966e-05	-1.70228e-05	-1.9049e-05	-2.10752e-05	-2.31014e-05	-2.51276e-05	-5.16246e-06	-2.15227e-05	-2.13605e-05	1.76024e-05	2.78173e-05	-2.02353e-05	-1.76408e-05	-1.9053e-05	3.07956e-05	6.0996e-05	4.52343e-05	-2.01596e-05	-7.85539e-07	-7.80528e-06	1.22898e-05	2.04471e-05	7.8076e-06	-8.95222e-06	-7.28852e-06	-0.000117061	-0.000383323	-0.000625119	-4.82378e-05
420.632	0	-8.06015e-06	-3.88062e-05	-1.23267e-05	-3.80909e-06	9.85469e-06	3.9258e-05	-1.20525e-06	-1.18351e-05	-4.91852e-06	2.98241e-05	2.86069e-05	2.73897e-05	2.61726e-05	2.49554e-05	2.37382e-05	2.2521e-05	2.13038e-05	2.00866e-05	1.88694e-05	1.76522e-05	1.6435e-05	1.52178e-05	1.40007e-05	1.27835e-05	1.15663e-05	3.09411e-05	1.97304e-05	-5.41583e-07	1.17135e-05	5.30622e-05	4.37668e-06	3.35993e-05	-2.40887e-06	-9.41188e-06	2.66554e-05	4.42747e-05	-5.03059e-06	-6.70736e-06	2.56473e-05	1.14071e-05	2.42126e-05	3.25997e-06	-1.86316e-05	1.62341e-05	-7.86499e-05	-0.000400568	-0.000648793	-0.000109779
421.276	0	9.97603e-06	-7.0659e-07	1.33373e-05	1.84398e-06	-2.74795e-06	-2.09025e-06	-6.52354e-06	-1.58093e-05	-2.40744e-05	2.21447e-05	2.14956e-05	2.08465e-05	2.01974e-05	1.95483e-05	1.88992e-05	1.82501e-05	1.7601e-05	1.69519e-05	1.63027e-05	1.56536e-05	1.50045e-05	1.43554e-05	1.37063e-05	1.30572e-05	1.24081e-05	1.67937e-05	1.62613e-05	-4.43949e-06	-3.10758e-05	1.29857e-05	1.87021e-07	-3.18752e-06	-1.98544e-05	3.23656e-05	3.35992e-05	3.48484e-05	-1.26726e-05	-1.51419e-05	2.08469e-06	8.64843e-06	-1.07536e-05	9.01696e-07	-5.52156e-05	-5.09086e-06	-8.66507e-05	-0.000360393	-0.000690275	-0.000187686
421.921	0	-1.78101e-05	-2.38299e-05	-2.0808e-05	-2.25504e-05	2.03005e-05	3.523e-05	1.86099e-05	3.65241e-06	-4.44665e-06	1.48627e-05	1.39372e-05	1.30116e-05	1.20861e-05	1.11605e-05	1.0235e-05	9.30941e-06	8.38386e-06	7.45831e-06	6.53276e-06	5.60721e-06	4.68166e-06	3.75611e-06	2.83056e-06	1.90501e-06	1.63726e-06	3.04005e-05	2.21041e-06	2.01503e-05	-6.90295e-06	-1.88828e-05	-7.4998e-05	2.99482e-06	-3.57718e-05	-9.77683e-07	2.82533e-06	5.77807e-06	-3.19761e-05	1.62963e-05	1.80006e-05	2.21394e-05	5.08185e-06	7.87647e-06	-3.89566e-05	1.71987e-05	-9.97334e-05	-0.000370898	-0.000665449	-8.57144e-05
422.566	0	2.24639e-06	1.67446e-06	-2.89579e-06	-2.60863e-05	1.2574e-05	2.85154e-05	-1.27322e-05	-1.37427e-05	-9.31816e-06	2.45498e-05	2.42872e-05	2.40247e-05	2.37622e-05	2.34996e-05	2.32371e-05	2.29746e-05	2.27121e-05	2.24495e-05	2.2187e-05	2.19245e-05	2.16619e-05	2.13994e-05	2.11369e-05	2.08744e-05	2.33741e-05	4.00083e-05	-1.69041e-06	2.19658e-05	3.33353e-05	3.98394e-06	-6.32071e-05	4.92627e-06	3.75358e-05	1.0948e-05	3.13902e-05	1.19944e-05	1.99378e-05	4.81543e-05	1.51761e-05	1.70024e-05	-3.792e-05	2.85011e-05	-1.22899e-05	-3.57398e-06	-0.000115465	-0.000389545	-0.000600342	0.000179442
423.21	0	-1.47073e-05	-4.22343e-05	-3.40253e-06	7.15865e-06	-1.19424e-07	-6.96892e-07	4.95118e-06	7.62295e-06	6.69353e-06	2.46395e-05	2.24265e-05	2.02135e-05	1.80006e-05	1.57876e-05	1.35746e-05	1.13617e-05	9.14869e-06	6.93572e-06	4.72275e-06	2.50978e-06	2.96808e-07	-1.91616e-06	-4.12913e-06	-6.3421e-06	-5.86623e-06	7.47248e-06	2.99173e-05	4.25021e-05	2.05039e-05	5.57416e-05	-1.95001e-05	2.01253e-05	-8.69605e-06	4.31839e-05	7.04538e-06	-3.7029e-06	3.27782e-05	2.5866e-05	-7.13032e-06	1.64956e-05	-3.83296e-06	-9.72412e-06	-3.79135e-05	-1.16195e-05	-9.50392e-05	-0.000392221	-0.000456437	0.00066309
423.855	0	-1.02975e-05	-3.52228e-05	-3.85908e-05	8.25885e-06	1.24295e-05	1.19816e-05	3.11292e-05	7.4636e-06	-5.40133e-07	1.80239e-06	-7.004e-07	-3.20319e-06	-5.70598e-06	-8.20877e-06	-1.07116e-05	-1.32144e-05	-1.57171e-05	-1.82199e-05	-2.07227e-05	-2.32255e-05	-2.57283e-05	-2.82311e-05	-3.07339e-05	-3.32367e-05	-2.48528e-05	1.04766e-05	2.28497e-05	-2.64031e-06	1.22141e-05	-1.7457e-05	-7.35271e-05	-4.08775e-06	2.12675e-05	3.4162e-05	2.70422e-05	1.94342e-05	-2.19657e-05	-3.17544e-05	-2.09946e-05	1.2847e-05	-5.99946e-06	4.53915e-06	1.53033e-06	-3.72892e-07	-0.000129755	-0.000351768	-0.000291238	0.00125
424.5	0	2.45472e-05	-1.37419e-05	-2.35017e-05	-1.96536e-05	9.73823e-06	2.08324e-05	-1.02558e-05	-2.50993e-05	-1.30173e-05	3.53075e-05	3.35941e-05	3.18808e-05	3.01674e-05	2.84541e-05	2.67407e-05	2.50274e-05	2.3314e-05	2.16007e-05	1.98873e-05	1.8174e-05	1.64606e-05	1.47473e-05	1.30339e-05	1.13206e-05	1.62841e-05	1.66106e-05	4.24738e-06	5.40103e-06	-5.86421e-06	5.19799e-07	2.40537e-05	1.03311e-05	-1.18593e-05	2.48345e-05	1.07618e-05	9.03975e-06	2.73081e-05	2.44301e-05	-1.18356e-05	-2.06224e-05	8.52221e-07	4.69906e-07	3.44082e-06	8.00132e-07	-9.31269e-05	-0.000301213	-2.5732e-07	0.00205
425.145	0	-3.18286e-05	-3.08722e-05	-9.14184e-06	3.21571e-06	1.32681e-05	2.28483e-05	-4.08069e-06	-5.34537e-06	1.85138e-05	3.15444e-05	2.87071e-05	2.58697e-05	2.30323e-05	2.01949e-05	1.73576e-05	1.45202e-05	1.16828e-05	8.84547e-06	6.0081e-06	3.17073e-06	3.33361e-07	-2.50401e-06	-5.34138e-06	-8.17875e-06	8.53809e-06	3.2238e-05	9.00356e-06	-2.64473e-05	-3.9178e-05	-5.13498e-05	-3.3761e-05	-1.3521e-05	-1.10909e-05	5.52856e-06	7.12986e-06	5.74806e-06	4.75346e-06	-8.45566e-06	7.43933e-06	-8.35184e-06	-3.30202e-05	-3.52803e-05	-5.09452e-05	-2.40547e-05	-0.000123941	-0.000255121	0.000313436	0.00291
425.79	0	-3.47233e-05	-5.35376e-05	-2.30326e-05	-2.36404e-05	1.54188e-05	1.45945e-05	4.66553e-06	6.8067e-06	3.74709e-05	5.22068e-05	4.82634e-05	4.432e-05	4.03765e-05	3.64331e-05	3.24897e-05	2.85463e-05	2.46029e-05	2.06595e-05	1.67161e-05	1.27726e-05	8.82922e-06	4.88581e-06	9.4239e-07	-3.00103e-06	1.27725e-05	-1.11848e-05	-2.86931e-05	-5.39888e-06	2.42367e-06	-3.44755e-05	-3.24742e-05	-1.57487e-05	1.3304e-05	2.96111e-05	1.59794e-05	-1.55079e-05	-9.54449e-06	1.62283e-06	-2.35547e-06	-9.72684e-07	1.06696e-05	4.03602e-06	5.04819e-06	3.26514e-06	-8.76748e-05	-0.000136551	0.000729359	0.00391
426.435	0	9.38041e-07	-7.86822e-06	-6.4059e-06	-1.04659e-05	-8.25762e-06	-8.24718e-07	-2.52925e-06	-3.71736e-06	3.59882e-06	3.79882e-05	3.61536e-05	3.43189e-05	3.24842e-05	3.06496e-05	2.88149e-05	2.69802e-05	2.51456e-05	2.33109e-05	2.14763e-05	1.96416e-05	1.78069e-05	1.59723e-05	1.41376e-05	1.23029e-05	7.47516e-06	-5.30641e-07	4.87882e-06	-1.40867e-05	-2.0365e-05	-4.28907e-05	-8.01887e-06	-3.13793e-05	3.27156e-06	-1.23396e-06	1.2381e-05	1.53647e-06	1.08623e-05	6.93252e-06	-1.41987e-05	-1.94678e-05	8.06033e-06	1.80563e-05	7.70214e-06	-5.02042e-07	-6.65427e-05	-4.03111e-05	0.00118	0.00486
427.08	0	2.241e-05	-1.18143e-05	8.43775e-07	-2.16096e-05	-2.82715e-05	1.18418e-05	8.73799e-06	-6.49151e-06	-1.30148e-05	3.9077e-06	1.72892e-06	-4.49864e-07	-2.62864e-06	-4.80743e-06	-6.98621e-06	-9.16499e-06	-1.13438e-05	-1.35225e-05	-1.57013e-05	-1.78801e-05	-2.00589e-05	-2.22377e-05	-2.44165e-05	-2.65952e-05	3.71379e-06	1.46708e-05	6.74031e-06	1.89385e-05	1.28467e-05	-2.57788e-05	-3.92974e-05	-1.04176e-05	3.85829e-05	1.90646e-06	-3.74689e-05	-4.98506e-05	-3.44676e-05	-1.0624e-05	-6.01023e-06	3.61228e-06	1.68708e-05	-2.69865e-06	-1.80163e-06	-1.99589e-06	-4.04019e-05	3.21672e-05	0.00157	0.0058
427.725	0	1.34814e-05	-2.31587e-05	-3.08155e-05	2.63887e-07	2.43233e-05	1.87953e-05	4.39657e-06	-3.54194e-05	-1.28845e-05	2.89496e-05	2.72823e-05	2.56151e-05	2.39478e-05	2.22806e-05	2.06133e-05	1.8946e-05	1.72788e-05	1.56115e-05	1.39443e-05	1.2277e-05	1.06098e-05	8.94251e-06	7.27526e-06	5.608e-06	3.18602e-05	-5.05572e-06	-3.27105e-06	-9.97356e-07	1.06318e-05	-3.06184e-05	-5.58669e-06	1.09874e-05	5.1735e-05	2.54882e-05	3.36123e-05	-2.43659e-06	9.23426e-06	9.30468e-06	1.05351e-06	2.57916e-05	2.12891e-05	1.4456e-07	-1.72545e-05	2.71982e-06	7.09145e-06	0.000128945	0.00197	0.00653
428.37	0	6.02729e-06	-3.76031e-05	-3.74375e-05	-2.01024e-05	4.07558e-06	1.63885e-05	3.40655e-06	2.27222e-06	1.7753e-05	3.07221e-05	2.85127e-05	2.63033e-05	2.40939e-05	2.18845e-05	1.96751e-05	1.74657e-05	1.52563e-05	1.30469e-05	1.08374e-05	8.62804e-06	6.41864e-06	4.20923e-06	1.99982e-06	-2.09581e-07	4.25004e-05	9.50373e-06	-9.4409e-06	2.24294e-05	2.53062e-05	-5.3298e-05	3.07085e-05	3.88618e-06	2.66799e-05	-4.38672e-05	2.87807e-05	-3.60699e-05	-1.58993e-05	-6.15155e-05	-2.77445e-06	1.54295e-05	1.1181e-06	-4.9433e-05	-1.52549e-05	-3.17263e-06	3.14048e-05	0.000187691	0.00221	0.00703
429.015	0	-1.86701e-06	-4.20941e-05	-5.04445e-05	-2.16736e-05	3.61011e-05	1.25144e-05	-2.23313e-06	2.05773e-05	5.80053e-06	4.21414e-05	4.06539e-05	3.91664e-05	3.76788e-05	3.61913e-05	3.47038e-05	3.32163e-05	3.17288e-05	3.02413e-05	2.87537e-05	2.72662e-05	2.57787e-05	2.42912e-05	2.28037e-05	2.13162e-05	5.10688e-05	-8.09806e-06	3.89333e-05	-2.02341e-06	1.0387e-05	-3.27583e-06	5.95889e-05	2.57649e-06	2.50586e-05	7.07965e-05	4.67604e-05	-4.64892e-05	-2.10973e-06	3.75313e-05	1.62253e-06	-4.93154e-06	7.30477e-05	-1.82715e-05	4.4034e-05	6.40171e-05	9.43329e-05	0.000285449	0.00242	0.00746
429.661	0	-7.45483e-06	-6.43943e-06	-1.5058e-05	-8.08323e-06	2.88884e-05	1.70124e-05	-6.6585e-06	-8.11801e-06	-5.64469e-06	1.48075e-05	1.36938e-05	1.25801e-05	1.14664e-05	1.03527e-05	9.23896e-06	8.12526e-06	7.01155e-06	5.89785e-06	4.78414e-06	3.67044e-06	2.55673e-06	1.44303e-06	3.29323e-07	5.76156e-07	2.44638e-05	3.26003e-05	9.23494e-06	2.79672e-05	1.34792e-05	-7.92128e-05	3.24885e-06	4.71246e-05	5.07101e-05	3.6414e-05	7.81838e-05	-2.41001e-06	2.67866e-05	-1.30731e-05	1.59623e-05	2.6131e-05	2.81997e-05	-3.32814e-05	5.32811e-05	2.32864e-05	7.98091e-05	0.00037076	0.00258	0.0075
430.306	0	-4.28448e-06	-3.2353e-05	-2.17261e-05	2.28895e-06	2.15385e-05	1.86663e-05	1.63158e-05	-2.24205e-05	-2.00175e-05	3.11188e-05	2.84504e-05	2.5782e-05	2.31136e-05	2.04452e-05	1.77768e-05	1.51084e-05	1.244e-05	9.77159e-06	7.10318e-06	4.43478e-06	1.76638e-06	-9.02022e-07	-3.57042e-06	-2.70983e-06	1.53291e-05	2.60523e-06	1.21455e-05	3.53341e-05	4.62011e-05	-6.08144e-06	-1.83767e-05	6.03946e-06	4.90134e-05	5.27926e-05	6.67764e-05	-2.74712e-06	2.40198e-06	2.46832e-05	2.68914e-05	1.76894e-05	3.67475e-05	2.88901e-07	-3.12007e-06	7.28262e-05	0.000110826	0.000514664	0.0027	0.00736
430.952	0	-5.7169e-06	-2.35572e-05	-1.1391e-05	-6.2733e-06	-3.04133e-06	-7.25308e-06	1.98383e-06	2.13557e-06	1.24784e-05	3.80624e-05	3.58885e-05	3.37146e-05	3.15407e-05	2.93668e-05	2.71929e-05	2.5019e-05	2.28451e-05	2.06712e-05	1.84973e-05	1.63234e-05	1.41495e-05	1.19756e-05	9.80172e-06	1.13959e-05	2.67375e-05	2.88643e-05	-9.92922e-06	-3.10219e-06	9.92493e-06	-6.47265e-05	1.36666e-06	3.03575e-05	7.27063e-05	4.38791e-06	-1.71994e-05	-9.90592e-06	3.11199e-06	5.08764e-06	2.7674e-05	1.83529e-05	4.60882e-05	3.24077e-05	2.8392e-05	8.42203e-05	0.000126208	0.000588121	0.00275	0.00708
431.597	0	-3.48276e-06	-4.92775e-05	-5.51618e-05	-4.18356e-05	1.71102e-05	3.51015e-05	2.12369e-05	4.05813e-06	1.70154e-05	4.60722e-05	4.39031e-05	4.1734e-05	3.95649e-05	3.73958e-05	3.52268e-05	3.30577e-05	3.08886e-05	2.87195e-05	2.65504e-05	2.43813e-05	2.22123e-05	2.00432e-05	1.78741e-05	1.61224e-05	1.23807e-05	8.15883e-06	6.76753e-06	-1.55935e-05	-2.94052e-05	-4.07549e-05	-1.07557e-05	-3.74987e-06	1.88672e-05	1.63521e-05	3.81171e-07	-1.19298e-05	-4.16449e-06	1.3723e-05	1.31834e-05	2.65712e-05	1.83199e-05	-2.96197e-05	1.68399e-05	4.23837e-05	0.000108307	0.000583586	0.00266	0.00666
432.243	0	-2.32078e-05	-4.2021e-05	-2.87542e-05	1.16524e-05	5.18452e-05	3.39331e-05	7.49769e-06	-3.53385e-06	-1.04558e-05	1.89002e-06	1.07206e-06	2.54094e-07	-5.63869e-07	-1.38183e-06	-2.19979e-06	-3.01776e-06	-3.83572e-06	-4.65368e-06	-5.47164e-06	-6.28961e-06	-7.10757e-06	-7.92553e-06	-8.74349e-06	-3.27389e-06	6.21841e-06	1.13115e-05	3.64458e-06	-3.19176e-06	5.72655e-07	-3.17078e-05	-1.0896e-05	-6.36585e-06	2.24266e-05	2.40987e-05	6.64964e-06	2.68017e-05	-6.54826e-07	2.04839e-06	7.13069e-07	-2.38761e-06	-9.85084e-06	-3.31123e-05	4.51955e-06	2.47818e-05	8.49965e-05	0.00051784	0.00244	0.00607
432.888	0	9.20969e-07	-3.53898e-05	-1.65238e-05	-1.1805e-05	-1.36693e-05	2.46522e-05	2.22017e-05	-5.73136e-06	1.54464e-07	3.05635e-05	2.93429e-05	2.81223e-05	2.69017e-05	2.5681e-05	2.44604e-05	2.32398e-05	2.20192e-05	2.07985e-05	1.95779e-05	1.83573e-05	1.71367e-05	1.5916e-05	1.46954e-05	3.29995e-05	9.62974e-06	-2.78827e-05	8.22769e-06	2.20759e-05	-2.65781e-05	-3.39102e-05	1.22747e-05	3.2238e-05	3.96623e-05	3.06188e-05	1.0445e-05	3.6476e-06	1.0697e-05	-1.75327e-05	-1.69516e-05	5.69538e-06	1.03463e-06	-5.05847e-06	2.90029e-05	5.48271e-05	7.46979e-05	0.000487691	0.00217	0.00536
433.534	0	5.45151e-06	-4.20578e-05	-3.54906e-05	-3.09004e-05	2.30894e-06	3.33639e-05	1.76835e-05	2.07866e-05	6.71245e-06	1.45259e-05	1.52158e-05	1.59056e-05	1.65955e-05	1.72853e-05	1.79751e-05	1.8665e-05	1.93548e-05	2.00447e-05	2.07345e-05	2.14244e-05	2.21142e-05	2.28041e-05	2.34939e-05	2.1696e-06	-5.75262e-06	1.17589e-05	1.42741e-05	1.90644e-05	2.76702e-06	1.16524e-05	1.10526e-05	5.10169e-05	7.41269e-05	4.25525e-05	1.54473e-06	9.57664e-06	2.21839e-05	-1.10996e-05	-5.70051e-06	1.00841e-05	-2.46224e-05	-1.31769e-05	9.31421e-06	2.73697e-05	3.89836e-05	0.00037901	0.00177	0.00456
434.18	0	-1.30575e-05	-2.84553e-05	-9.47233e-06	9.17496e-06	2.84641e-05	-4.19678e-06	-1.37035e-05	-5.76094e-06	4.78452e-07	2.63825e-05	2.33161e-05	2.02497e-05	1.71834e-05	1.4117e-05	1.10506e-05	7.98427e-06	4.9179e-06	1.85154e-06	-1.21483e-06	-4.28119e-06	-7.34756e-06	-1.04139e-05	-1.34803e-05	2.20774e-05	1.0969e-05	1.31442e-05	-5.12137e-06	1.39196e-05	-1.78808e-05	-2.50404e-05	-2.05835e-05	1.32701e-05	2.77835e-05	4.38028e-05	1.18573e-05	-5.96616e-06	1.00566e-05	2.71262e-05	1.16429e-05	-1.32957e-06	-4.44934e-06	9.64076e-06	1.18771e-05	2.01949e-05	-1.32772e-05	0.000256282	0.00139	0.00374
434.826	0	-3.76554e-05	-1.19498e-05	-1.58477e-05	-1.95214e-05	2.23403e-05	3.52537e-05	2.10257e-05	1.04909e-05	6.6784e-06	2.00904e-05	1.96227e-05	1.9155e-05	1.86873e-05	1.82196e-05	1.77519e-05	1.72842e-05	1.68165e-05	1.63488e-05	1.58811e-05	1.54133e-05	1.49456e-05	1.44779e-05	1.40102e-05	4.49833e-05	1.09741e-05	1.39685e-05	1.47793e-05	1.2997e-05	-2.04458e-05	-1.33067e-05	-1.19944e-06	5.18873e-05	3.65037e-05	1.74324e-05	-1.27145e-05	4.84782e-06	8.40345e-06	1.07192e-05	1.52946e-05	4.48832e-05	1.21024e-05	3.37781e-05	5.38778e-05	7.12668e-05	-2.48768e-05	0.000126617	0.000909424	0.00294
435.472	0	1.28622e-05	-2.13732e-05	-1.23374e-05	-1.82734e-05	-4.44898e-06	1.45396e-05	-2.36203e-05	-9.62952e-06	2.42572e-05	9.31696e-06	6.65953e-06	4.00209e-06	1.34466e-06	-1.31277e-06	-3.97021e-06	-6.62764e-06	-9.28507e-06	-1.19425e-05	-1.45999e-05	-1.72574e-05	-1.99148e-05	-2.25722e-05	-2.52297e-05	-1.34459e-05	1.14457e-05	3.25708e-05	1.25896e-05	6.14358e-05	9.483e-06	2.22802e-07	3.9445e-06	2.99658e-05	9.65158e-06	1.04068e-05	3.7758e-06	1.48076e-05	-1.31486e-05	6.74804e-06	1.29365e-05	4.33127e-05	1.0542e-05	2.38411e-05	3.45414e-05	5.67884e-05	-3.2984e-05	-6.94591e-06	0.00051509	0.00219
436.118	0	9.99021e-07	-1.72793e-05	-6.2118e-06	-1.19267e-05	-5.58336e-06	3.3015e-06	5.39886e-06	-3.22387e-06	1.69708e-06	3.74492e-05	3.68779e-05	3.63066e-05	3.57354e-05	3.51641e-05	3.45928e-05	3.40216e-05	3.34503e-05	3.28791e-05	3.23078e-05	3.17365e-05	3.11653e-05	3.0594e-05	3.00227e-05	3.54066e-05	2.56284e-05	2.85985e-05	1.05538e-05	4.6022e-05	3.67612e-06	1.59141e-05	1.99658e-05	1.54481e-05	4.13081e-05	2.94381e-05	-7.95504e-07	9.56433e-06	2.47245e-05	1.61738e-05	1.4525e-05	4.61964e-05	-2.14758e-05	1.67387e-05	1.67516e-05	8.12045e-05	-8.31422e-05	-0.000143903	9.14892e-05	0.0015
436.764	0	-1.31165e-05	-3.20789e-05	-1.53161e-05	-2.49617e-05	1.34494e-05	3.39468e-05	5.96756e-06	-7.99589e-06	6.38297e-06	3.17511e-05	3.04957e-05	2.92403e-05	2.79849e-05	2.67294e-05	2.5474e-05	2.42186e-05	2.29632e-05	2.17077e-05	2.04523e-05	1.91969e-05	1.79415e-05	1.66861e-05	1.54306e-05	1.44058e-05	-2.43184e-05	1.80901e-05	6.04129e-05	5.9893e-05	-4.39174e-05	-1.36608e-05	3.13873e-05	3.07766e-05	1.38184e-05	-1.5947e-05	-3.61874e-06	-1.5723e-05	-2.132e-05	-1.68537e-05	2.11557e-07	2.38363e-05	-4.74533e-05	-2.13034e-05	3.02327e-05	3.70361e-05	-0.000140281	-0.000255871	-0.00020465	0.000971522
437.41	0	1.08649e-05	-2.01866e-05	-1.63153e-05	-1.35565e-06	6.06891e-06	-1.69512e-05	-1.69854e-05	-1.44351e-05	1.48747e-05	3.06267e-05	2.75445e-05	2.44623e-05	2.13801e-05	1.82978e-05	1.52156e-05	1.21334e-05	9.05118e-06	5.96896e-06	2.88674e-06	-1.95475e-07	-3.27769e-06	-6.35991e-06	-9.49983e-06	-1.60419e-05	-1.80057e-05	8.2156e-07	1.39797e-05	1.31357e-05	-7.4521e-06	3.41248e-05	7.81564e-06	1.12343e-05	-8.55909e-06	8.37306e-06	-1.67728e-05	1.59129e-05	-2.54631e-05	-1.46678e-05	-1.67253e-05	2.04002e-05	-4.54517e-05	-2.98138e-05	6.04842e-06	-1.99266e-05	-0.000159355	-0.000273056	-0.000447634	0.000461111
438.056	0	1.60307e-05	-7.39172e-06	-4.8792e-06	-8.59226e-06	1.59959e-05	7.25549e-06	-1.99771e-05	-1.19529e-05	-9.03193e-06	2.70805e-05	2.8524e-05	2.99675e-05	3.14109e-05	3.28544e-05	3.42979e-05	3.57414e-05	3.71849e-05	3.86284e-05	4.00719e-05	4.15154e-05	4.29589e-05	4.44024e-05	4.48172e-05	3.05001e-05	-2.38297e-05	-1.24709e-05	4.1748e-05	3.84883e-05	-2.72615e-05	-1.36362e-05	6.12248e-06	1.04323e-05	4.77491e-05	3.38541e-05	3.99264e-05	-3.80078e-06	2.81839e-05	-1.75682e-06	1.05062e-05	1.51176e-05	-3.81686e-05	1.87915e-06	4.02271e-05	6.37163e-05	-0.000122369	-0.000405946	-0.000542036	0.000226487
438.702	0	-3.75052e-06	-2.15073e-05	-1.98107e-05	-1.44645e-05	2.69223e-05	2.72422e-05	-9.28718e-06	-1.84673e-05	4.44379e-06	2.62122e-05	2.49288e-05	2.36454e-05	2.2362e-05	2.10785e-05	1.97951e-05	1.85117e-05	1.72283e-05	1.59448e-05	1.46614e-05	1.3378e-05	1.20946e-05	1.08111e-05	2.09715e-05	6.29742e-05	1.66781e-05	7.22541e-05	7.47533e-06	1.94874e-05	-3.64108e-05	-2.25191e-05	-1.38259e-05	6.37326e-05	1.57952e-05	7.13536e-05	6.417e-05	6.59922e-05	5.1552e-05	2.64369e-05	2.79696e-05	5.94167e-05	2.4025e-05	2.75585e-05	2.73916e-05	4.2205e-05	-0.00011537	-0.000360235	-0.000602418	8.63223e-05
439.348	0	-1.24257e-07	-1.21042e-05	6.71583e-06	-6.72816e-06	1.79622e-05	2.3078e-05	-3.08167e-06	-2.85976e-05	-2.22275e-05	-4.60671e-06	-6.37766e-06	-8.14861e-06	-9.91956e-06	-1.16905e-05	-1.34615e-05	-1.52324e-05	-1.70034e-05	-1.87743e-05	-2.05453e-05	-2.23162e-05	-2.40872e-05	-2.58581e-05	-1.18612e-05	2.31464e-05	-4.50893e-06	1.15729e-05	-9.52525e-06	-2.17789e-05	-5.17656e-05	2.34889e-05	2.80823e-05	2.29941e-05	1.23929e-05	1.09711e-05	-7.79249e-06	5.92919e-06	-1.43855e-05	-9.56473e-06	5.00933e-06	-1.96782e-05	-2.66725e-05	1.40821e-05	6.80206e-05	-8.75217e-06	-0.00013713	-0.000417491	-0.00065479	-7.38881e-05
439.995	0	3.25942e-06	-2.9095e-05	-3.68193e-05	-2.2807e-05	2.26199e-05	3.4731e-05	1.27009e-05	-8.69322e-06	-2.22821e-06	2.66911e-05	2.67952e-05	2.68992e-05	2.70033e-05	2.71074e-05	2.72114e-05	2.73155e-05	2.74195e-05	2.75236e-05	2.76276e-05	2.77317e-05	2.78358e-05	2.79398e-05	1.94417e-05	-1.93e-06	-7.25409e-06	-8.16987e-06	6.75892e-06	2.19303e-05	-5.08427e-05	-3.33277e-05	-2.23471e-06	3.68355e-05	3.67994e-05	3.36765e-05	2.96781e-05	1.25499e-05	1.74746e-05	4.92912e-05	2.96066e-05	2.37374e-05	2.95685e-06	1.39359e-05	2.29851e-05	-1.69422e-05	-0.000161233	-0.000449597	-0.000713974	-0.000113232
440.641	0	-6.57266e-06	-2.39779e-05	-2.14619e-05	-2.42505e-05	1.52732e-06	3.10053e-05	-4.36564e-06	1.95585e-06	3.04378e-05	2.96393e-05	2.91333e-05	2.86274e-05	2.81214e-05	2.76154e-05	2.71094e-05	2.66035e-05	2.60975e-05	2.55915e-05	2.50856e-05	2.45796e-05	2.40736e-05	2.35677e-05	9.79913e-06	3.3956e-06	3.88707e-05	3.7198e-05	-9.67494e-06	-3.63861e-05	-4.4951e-06	4.77565e-05	2.92508e-05	1.57647e-05	3.4333e-05	8.9958e-05	3.61982e-05	3.65072e-05	4.35501e-05	2.3544e-05	1.35592e-05	5.66329e-06	4.29789e-06	2.54826e-05	2.08819e-05	2.50924e-06	-0.00016148	-0.000504159	-0.000743996	-0.000163881
441.288	0	-1.84625e-05	-3.78875e-05	-1.04227e-05	-3.07633e-06	1.43826e-05	1.25237e-05	1.4597e-05	-2.05897e-05	-2.53863e-07	4.01673e-05	3.72799e-05	3.43924e-05	3.1505e-05	2.86175e-05	2.57301e-05	2.28426e-05	1.99552e-05	1.70677e-05	1.41802e-05	1.12928e-05	8.40534e-06	5.51789e-06	2.84478e-05	2.82138e-05	3.80017e-06	1.76095e-05	3.42733e-05	1.08954e-06	-3.19081e-05	2.82836e-07	1.95116e-05	2.55965e-05	2.127e-05	1.45907e-06	1.74755e-05	2.96066e-05	2.86758e-05	2.40006e-05	1.36069e-05	3.5622e-06	-1.50858e-05	1.99641e-05	3.4091e-05	-2.42406e-05	-0.000159915	-0.000468495	-0.000763583	-0.000199288
441.934	0	-1.15778e-06	-2.20628e-05	-4.02255e-05	-4.48646e-05	2.32568e-05	3.06784e-05	-5.04846e-06	-4.50158e-06	2.32952e-05	2.86199e-05	2.65627e-05	2.45054e-05	2.24482e-05	2.03909e-05	1.83336e-05	1.62764e-05	1.42191e-05	1.21619e-05	1.01046e-05	8.04738e-06	5.99012e-06	3.93287e-06	8.57129e-07	-1.40729e-05	-1.60775e-05	-4.70074e-06	1.11617e-05	-8.6655e-08	-2.28026e-05	-1.86553e-05	3.92261e-07	3.44295e-05	2.52364e-05	-1.67532e-05	-7.46945e-07	-6.65053e-06	-1.61827e-05	-2.05282e-05	2.46724e-06	5.70225e-06	9.42611e-06	2.15099e-05	1.57318e-05	-5.71385e-05	-0.000209955	-0.000540266	-0.000827216	-0.000251011
442.581	0	-1.20322e-05	-3.02848e-05	-1.76812e-05	3.35369e-06	4.81117e-05	3.41253e-05	-2.82781e-05	-4.33456e-05	1.11656e-05	5.09879e-05	4.89575e-05	4.6927e-05	4.48965e-05	4.28661e-05	4.08356e-05	3.88052e-05	3.67747e-05	3.47443e-05	3.27138e-05	3.06834e-05	2.86529e-05	2.66225e-05	6.66782e-05	2.4321e-05	9.99798e-06	2.70931e-07	1.12795e-05	-1.68635e-05	2.81941e-06	1.38996e-05	-7.99819e-06	2.51775e-06	3.32106e-05	3.10119e-05	3.85611e-05	1.97365e-05	1.50555e-05	2.14558e-05	3.75383e-05	2.23757e-06	7.18636e-08	1.23519e-05	6.13092e-05	1.77488e-06	-0.000159202	-0.00049822	-0.000813572	-0.000305925
443.227	0	-1.88847e-05	-2.18301e-05	2.24565e-07	6.22551e-06	3.71893e-05	4.14419e-05	-2.9764e-06	-3.63121e-05	-1.48753e-05	1.83557e-05	1.8131e-05	1.79063e-05	1.76815e-05	1.74568e-05	1.72321e-05	1.70073e-05	1.67826e-05	1.65579e-05	1.63331e-05	1.61084e-05	1.58837e-05	1.56589e-05	3.37886e-05	-1.80497e-05	-2.70938e-05	1.36288e-05	1.6608e-05	2.90699e-06	2.23664e-05	2.39614e-06	4.43544e-06	3.1569e-05	3.4714e-05	-9.37442e-06	2.25557e-07	-2.31226e-05	4.73841e-06	9.33514e-06	-1.0744e-05	-5.61813e-06	2.72962e-05	6.85572e-05	5.60591e-05	7.57434e-06	-0.000145967	-0.000554563	-0.000840696	-0.000361867
443.874	0	-4.78851e-06	-3.10745e-05	-2.79098e-05	-2.06427e-05	-8.10483e-06	1.43877e-06	3.02225e-05	1.59796e-05	1.29068e-05	4.34617e-05	4.24028e-05	4.13439e-05	4.0285e-05	3.9226e-05	3.81671e-05	3.71082e-05	3.60493e-05	3.49904e-05	3.39314e-05	3.28725e-05	3.18136e-05	3.07547e-05	1.70496e-05	-6.78691e-06	2.35764e-05	-1.10187e-05	1.64432e-05	-5.83779e-05	-2.21001e-05	-1.13605e-05	3.84095e-05	3.88709e-05	1.25665e-05	-1.3135e-05	-1.11761e-05	-1.61522e-05	-2.68491e-05	-3.30026e-05	-7.69512e-06	-3.604e-05	-4.99881e-06	2.92298e-05	2.1105e-05	-3.2584e-05	-0.000169609	-0.000499113	-0.000839677	-0.000453629
444.521	0	-1.34066e-05	-6.23634e-07	-5.32198e-06	-4.58324e-06	3.19702e-05	2.28475e-05	2.49444e-05	-1.58931e-06	-3.49415e-05	4.59178e-06	5.5307e-06	6.46963e-06	7.40855e-06	8.34748e-06	9.28641e-06	1.02253e-05	1.11643e-05	1.21032e-05	1.30421e-05	1.3981e-05	1.492e-05	1.58589e-05	3.16916e-05	-5.3268e-05	-5.84344e-06	-1.90854e-05	-2.49007e-05	-3.95427e-06	8.39981e-06	3.76222e-05	2.5136e-05	3.64441e-06	1.78226e-05	-2.25486e-05	6.91965e-06	-2.11923e-05	3.6438e-06	1.26077e-06	-2.12471e-05	-3.96719e-05	3.34879e-05	2.9563e-05	2.58948e-05	-4.1284e-05	-0.000133957	-0.000507514	-0.000837954	-0.000476228
445.168	0	-1.50271e-05	-1.79824e-05	6.38962e-06	-2.21613e-05	-1.28975e-05	1.13704e-05	4.8088e-06	-1.09942e-05	1.78585e-05	1.88362e-05	1.58061e-05	1.27761e-05	9.74608e-06	6.71606e-06	3.68603e-06	6.56001e-07	-2.37403e-06	-5.40405e-06	-8.43408e-06	-1.14641e-05	-1.44941e-05	-1.75242e-05	4.64995e-05	1.29379e-07	4.8537e-06	2.21563e-05	1.00578e-05	-5.78135e-05	1.9319e-05	9.20861e-06	5.23859e-06	-9.51079e-06	5.47237e-05	-2.65129e-05	1.62905e-05	-7.71951e-07	2.28243e-05	3.47069e-06	-1.33852e-05	-1.17804e-05	1.64292e-05	1.12466e-05	3.69318e-05	-3.55618e-05	-0.000110482	-0.000552083	-0.000822267	-0.000530037
445.815	0	-1.58794e-05	-2.06897e-05	2.05111e-05	1.39658e-05	2.72817e-05	2.31599e-05	-1.88423e-05	-2.1641e-05	-1.15379e-05	1.54911e-06	1.93398e-06	2.31885e-06	2.70372e-06	3.08859e-06	3.47346e-06	3.85832e-06	4.24319e-06	4.62806e-06	5.01293e-06	5.3978e-06	5.78267e-06	6.16754e-06	4.02959e-05	3.56328e-06	-1.2372e-05	4.14855e-05	3.07689e-05	-1.84778e-05	-3.18392e-06	4.86293e-05	4.75136e-05	8.70461e-07	4.50692e-05	1.58217e-06	-1.00831e-05	3.51716e-05	-4.48287e-06	-1.31255e-05	4.3137e-05	1.2316e-05	9.13128e-06	1.17377e-05	2.70312e-05	-2.74647e-05	-8.16174e-05	-0.000523476	-0.000812831	-0.000615211
446.462	0	-1.2619e-05	-3.66913e-05	-3.6548e-05	-3.04826e-06	3.08342e-05	7.36488e-07	-6.64109e-06	1.71924e-06	2.70774e-05	8.06381e-06	3.91605e-06	-2.31715e-07	-4.37947e-06	-8.52723e-06	-1.2675e-05	-1.68228e-05	-2.09705e-05	-2.51183e-05	-2.9266e-05	-3.34138e-05	-3.75616e-05	-3.89751e-05	-2.02331e-06	-2.68061e-06	-5.61314e-06	1.1935e-06	8.6093e-06	-4.12793e-05	3.03157e-05	8.52776e-06	2.1165e-05	3.67879e-05	-6.98916e-07	-2.94378e-05	3.69346e-05	-2.19288e-05	3.15438e-05	-8.60414e-06	1.45657e-05	-4.62982e-07	6.50168e-06	1.4088e-05	5.17795e-05	-1.70884e-05	-0.000121095	-0.000529943	-0.000800726	-0.000550663
447.109	0	-1.44897e-05	-1.49219e-05	-2.88904e-05	-2.55989e-05	2.7952e-05	3.70676e-05	1.72368e-05	-6.75658e-06	-9.51627e-09	1.14678e-05	1.03697e-05	9.27157e-06	8.17347e-06	7.07537e-06	5.97728e-06	4.87918e-06	3.78108e-06	2.68299e-06	1.58489e-06	4.86794e-07	-6.11302e-07	7.37201e-07	1.22457e-05	-6.46536e-06	5.96333e-06	-5.07553e-06	5.32753e-05	-3.97607e-05	-3.55459e-05	-1.2151e-05	5.31197e-05	1.97976e-05	5.17685e-05	-2.28976e-05	1.75391e-05	-1.17246e-05	-2.13298e-05	1.37059e-05	9.76816e-06	1.1737e-05	5.74679e-05	5.28696e-05	1.16661e-05	-3.21584e-05	-8.95925e-05	-0.000488634	-0.00075592	-0.000490226
447.756	0	2.98224e-07	-2.46605e-05	-3.29823e-05	-4.21103e-05	2.73123e-05	5.13312e-05	1.84502e-05	-1.15165e-05	-5.94884e-06	1.34534e-05	1.21047e-05	1.07559e-05	9.40714e-06	8.05837e-06	6.70961e-06	5.36085e-06	4.01208e-06	2.66332e-06	1.31456e-06	-3.4206e-08	-1.38297e-06	-8.3392e-06	-2.81733e-05	-1.11512e-05	1.41215e-05	1.79681e-05	-5.27305e-06	-9.29428e-06	9.23269e-06	-7.34411e-06	2.33247e-05	3.46577e-05	5.03076e-05	-1.33955e-05	1.15661e-05	-4.2419e-05	-2.13165e-05	-1.79893e-05	1.09714e-05	-1.14773e-05	2.20963e-05	9.27951e-06	-2.00145e-05	-4.88248e-05	-0.000110934	-0.000484165	-0.00074061	-0.00046584
448.403	0	5.56181e-06	-1.62867e-05	-3.85619e-06	5.09408e-06	2.81783e-05	1.0638e-06	-1.66339e-05	-1.09989e-05	-1.06733e-05	-6.00887e-07	-7.90077e-07	-9.79266e-07	-1.16846e-06	-1.35765e-06	-1.54684e-06	-1.73603e-06	-1.92522e-06	-2.11441e-06	-2.3036e-06	-2.49279e-06	-2.68197e-06	4.58199e-06	2.58484e-05	2.7691e-05	3.2676e-05	6.03212e-05	2.1859e-05	-2.12664e-05	-4.57866e-06	4.43252e-07	2.23552e-05	-6.03499e-06	3.15923e-05	3.19457e-06	1.76342e-05	-1.17069e-05	1.58692e-05	-2.12193e-05	1.40534e-05	3.15428e-05	3.32316e-05	2.35536e-05	-1.24396e-05	-4.95948e-05	-0.00014901	-0.000462749	-0.000739466	-0.00041222
449.05	0	-2.81541e-05	-4.95835e-05	-9.30517e-06	-1.85808e-06	1.29852e-05	1.85701e-05	2.00681e-05	1.60889e-06	7.45569e-06	1.92862e-05	1.79523e-05	1.66185e-05	1.52847e-05	1.39509e-05	1.26171e-05	1.12833e-05	9.94946e-06	8.61564e-06	7.28183e-06	5.94801e-06	4.6142e-06	-6.92751e-07	7.14758e-07	7.92259e-06	-1.32648e-05	-3.40517e-06	5.86888e-06	-8.87925e-06	1.05039e-05	4.98893e-05	7.03507e-05	3.4515e-05	1.22682e-05	-3.80486e-06	1.75122e-05	1.07135e-05	2.71152e-05	-4.34753e-06	2.55138e-05	2.15523e-05	3.36531e-05	8.98361e-06	-1.86766e-05	-1.11262e-05	-0.000105914	-0.000446889	-0.000720176	-0.00034915
449.698	0	-5.65191e-06	-1.28993e-05	-7.99384e-06	-1.62598e-05	3.59736e-05	3.51612e-06	-2.59536e-05	-2.12346e-05	9.55781e-06	3.04102e-05	2.85817e-05	2.67531e-05	2.49246e-05	2.30961e-05	2.12676e-05	1.9439e-05	1.76105e-05	1.5782e-05	1.39535e-05	1.2125e-05	1.02964e-05	-2.18419e-06	-5.41866e-06	-6.44618e-07	2.46625e-06	3.49384e-05	1.24797e-05	-2.70069e-05	-2.38819e-05	7.30774e-06	4.10974e-05	5.79019e-05	4.61346e-05	1.10853e-06	-9.35308e-08	1.43097e-06	1.8341e-05	2.11524e-05	-1.83239e-05	-1.35934e-05	2.94419e-05	2.38476e-05	-2.94004e-05	-1.03943e-05	-0.000133313	-0.000465954	-0.000754255	-0.000371282
450.345	0	-1.81368e-05	-5.13045e-05	1.8532e-05	9.51873e-06	2.53645e-05	2.16673e-05	-1.70154e-05	-3.64496e-05	-3.00293e-06	1.82787e-05	1.6494e-05	1.47093e-05	1.29246e-05	1.11399e-05	9.35522e-06	7.57052e-06	5.78582e-06	4.00113e-06	2.21643e-06	4.3173e-07	-1.35297e-06	2.67451e-05	2.08613e-05	2.53985e-06	-1.28351e-05	-3.57938e-05	-2.4676e-05	-2.13355e-05	-2.07551e-05	-5.32969e-06	1.25203e-05	-8.53328e-06	-1.8469e-06	1.71949e-05	-1.2498e-05	-1.05264e-05	-5.4085e-06	1.04313e-05	1.24433e-05	-9.92766e-06	1.37703e-06	-4.62033e-06	-2.86461e-05	-4.07493e-05	-0.000146085	-0.00044695	-0.000747941	-0.000366461
450.992	0	-3.73789e-05	-4.3549e-05	-2.14631e-05	-2.41969e-05	3.24743e-05	2.98559e-05	1.89069e-05	7.12235e-06	1.47105e-05	1.16786e-05	8.89952e-06	6.12042e-06	3.34133e-06	5.62239e-07	-2.21685e-06	-4.99595e-06	-7.77504e-06	-1.05541e-05	-1.33332e-05	-1.61123e-05	-1.88914e-05	-2.28003e-05	-1.77798e-05	1.91001e-05	4.60836e-05	2.73981e-05	-1.5462e-05	-3.01537e-05	-2.34372e-05	-1.16759e-06	1.75021e-05	2.29149e-05	1.10377e-05	2.131e-05	1.64211e-05	1.29524e-05	-1.47007e-05	8.59821e-06	4.74119e-05	3.3388e-05	1.77362e-05	2.33131e-05	2.5382e-06	1.36199e-05	-0.000106518	-0.000428694	-0.000735851	-0.00033417
451.64	0	-1.58386e-05	-3.33724e-05	2.85175e-07	-5.23216e-06	7.11536e-06	-2.72908e-08	-3.99218e-06	2.93758e-06	1.4704e-05	2.69997e-05	2.6682e-05	2.63642e-05	2.60465e-05	2.57287e-05	2.54109e-05	2.50932e-05	2.47754e-05	2.44577e-05	2.41399e-05	2.38221e-05	2.35044e-05	3.26843e-05	-5.90286e-07	2.45266e-05	1.09078e-05	1.05418e-05	-6.80873e-06	-1.37914e-05	1.21648e-05	3.25324e-05	2.76574e-05	2.05643e-05	-3.41568e-06	2.29179e-05	2.07359e-05	-3.33819e-06	-8.44104e-06	3.00263e-05	-6.22162e-06	8.33644e-06	2.35887e-05	8.9972e-06	-3.04394e-05	-1.97068e-05	-0.000145767	-0.000453849	-0.000755212	-0.000372204
452.287	0	-1.77906e-05	-3.20344e-05	4.67442e-06	3.06713e-06	1.61339e-05	-2.14682e-07	-6.30928e-06	-9.32122e-06	1.38319e-05	1.50715e-05	1.23128e-05	9.55416e-06	6.79547e-06	4.03678e-06	1.27809e-06	-1.4806e-06	-4.23929e-06	-6.99798e-06	-9.75667e-06	-1.25154e-05	-1.5274e-05	5.73547e-06	1.92755e-05	4.01434e-05	2.23149e-05	4.18451e-05	-1.7107e-05	3.84659e-06	1.27083e-07	3.34533e-05	5.04447e-05	5.94103e-05	4.55592e-06	1.39284e-05	2.30437e-05	3.61899e-05	1.32868e-05	-9.5101e-06	-2.31568e-05	2.54993e-05	7.67169e-05	2.55852e-05	-4.41221e-05	-4.67437e-05	-0.000158958	-0.000427944	-0.000735171	-0.000367821
452.935	0	-8.28397e-06	-3.86852e-05	-2.76486e-05	-3.59818e-05	3.27956e-05	2.88331e-05	4.92041e-06	2.15785e-05	-3.56519e-07	-1.55916e-05	-1.56741e-05	-1.57566e-05	-1.58392e-05	-1.59217e-05	-1.60042e-05	-1.60868e-05	-1.61693e-05	-1.62518e-05	-1.63344e-05	-1.64169e-05	-1.64994e-05	1.19413e-05	-9.19823e-06	2.22723e-05	3.12933e-05	2.89061e-05	-6.45961e-05	2.16436e-05	3.03328e-05	3.13513e-05	5.69858e-06	3.57974e-05	7.13566e-07	-7.46018e-06	-1.95898e-05	1.64432e-05	8.77205e-06	1.26022e-05	-2.97259e-05	9.1174e-06	3.50965e-05	4.58032e-05	-3.64522e-05	-1.27949e-05	-0.000162772	-0.000441415	-0.000758202	-0.000463964
453.583	0	1.62715e-05	-1.41033e-05	-1.88305e-05	-3.72097e-05	-1.02114e-05	5.50121e-06	2.70287e-06	1.03508e-05	1.73119e-05	5.33652e-06	3.79473e-06	2.25295e-06	7.11158e-07	-8.30631e-07	-2.37242e-06	-3.91421e-06	-5.456e-06	-6.99778e-06	-8.53957e-06	-1.00814e-05	-1.16232e-05	-2.99074e-06	1.07627e-05	-3.31966e-06	8.56604e-06	1.77487e-05	-2.1213e-05	-1.17979e-05	-1.56265e-05	5.4506e-05	9.78851e-06	1.06023e-05	-2.76751e-05	1.31195e-05	-1.62657e-05	8.82183e-06	2.19116e-05	1.15343e-05	1.17454e-05	1.71063e-05	2.14273e-05	2.79083e-06	-2.07471e-05	3.6805e-05	-9.60711e-05	-0.000408866	-0.000750904	-0.000478422
454.23	0	2.25924e-05	-2.65382e-05	-2.55303e-05	-2.78275e-05	6.12435e-06	1.43142e-05	2.33335e-05	-2.17993e-05	-1.46972e-05	1.98024e-05	1.86457e-05	1.7489e-05	1.63323e-05	1.51755e-05	1.40188e-05	1.28621e-05	1.17054e-05	1.05487e-05	9.39203e-06	8.23533e-06	7.07863e-06	5.2787e-06	1.91535e-05	4.80653e-05	2.96655e-05	9.12386e-05	-5.6482e-05	3.49248e-05	-1.27439e-05	2.72991e-05	9.26123e-05	8.22664e-05	3.9433e-05	2.38524e-05	2.95465e-05	-2.31041e-05	1.03029e-05	2.58632e-05	-1.60938e-05	5.2711e-06	6.09752e-05	8.10998e-05	1.33225e-05	4.20818e-05	-0.000111271	-0.000417295	-0.000737954	-0.000563864
454.878	0	-9.60068e-06	-1.16531e-05	-1.98171e-07	3.79269e-06	1.21897e-05	4.78741e-06	-1.59425e-05	-3.2414e-05	1.78399e-05	2.33179e-05	2.0498e-05	1.76781e-05	1.48582e-05	1.20383e-05	9.21842e-06	6.39853e-06	3.57863e-06	7.58739e-07	-2.06115e-06	-4.88105e-06	-7.70094e-06	2.98449e-05	-3.55659e-05	3.37139e-05	-1.91695e-05	3.45289e-05	-1.07869e-05	-2.07528e-05	-2.77678e-06	3.11423e-05	1.79441e-05	2.88616e-06	-1.16853e-05	2.76891e-05	6.86005e-06	1.9443e-05	5.63791e-07	1.28922e-05	-3.94133e-05	-2.71059e-06	4.52142e-05	4.08629e-05	2.61173e-05	-1.96482e-05	-0.000119677	-0.000420582	-0.000719134	-0.000625615
455.526	0	-2.59301e-05	-5.21075e-05	-4.07727e-05	1.00133e-05	4.4768e-05	1.61504e-05	1.01605e-07	1.4395e-06	2.14004e-05	2.95177e-05	2.88356e-05	2.81535e-05	2.74714e-05	2.67894e-05	2.61073e-05	2.54252e-05	2.47431e-05	2.4061e-05	2.33789e-05	2.26968e-05	2.32795e-05	5.66932e-05	-1.70084e-05	1.05292e-05	0.000124891	8.83437e-05	-2.92865e-05	-1.41142e-05	5.09843e-05	6.13951e-05	6.11604e-05	4.57254e-05	7.92478e-06	-3.82439e-06	1.71038e-05	1.89803e-05	-1.78643e-05	8.47749e-05	-2.20866e-05	4.44157e-06	2.22612e-05	1.43249e-05	-1.2703e-05	5.06412e-05	-6.43644e-05	-0.000384785	-0.00074777	-0.000597887
456.174	0	-2.67012e-05	-7.15789e-05	-7.26829e-06	4.12064e-05	6.31186e-05	2.47348e-05	-5.17329e-06	-2.59138e-05	-1.09917e-05	2.98642e-05	3.05243e-05	3.11845e-05	3.18447e-05	3.25048e-05	3.3165e-05	3.38251e-05	3.44853e-05	3.51455e-05	3.58056e-05	3.64658e-05	3.5699e-05	1.9825e-05	-1.44986e-05	-2.60383e-05	3.39562e-06	-2.85025e-05	-2.56489e-05	5.40876e-05	9.09712e-06	3.8401e-05	3.5267e-05	3.58528e-05	1.92073e-05	-1.25152e-05	-1.24484e-05	3.48067e-05	-4.71477e-05	3.64601e-07	-5.70863e-05	-2.54317e-05	4.26868e-05	-1.35059e-05	-3.29508e-05	2.0184e-05	-9.40828e-05	-0.000405707	-0.000790607	-0.000623876
456.822	0	-4.98923e-06	-4.5288e-05	-6.39982e-06	-1.20708e-05	-7.69905e-06	3.54967e-06	1.82735e-05	-1.50519e-06	3.71809e-06	2.18332e-05	2.13862e-05	2.09392e-05	2.04923e-05	2.00453e-05	1.95983e-05	1.91513e-05	1.87043e-05	1.82574e-05	1.78104e-05	1.73634e-05	1.64764e-05	1.86545e-05	3.81693e-05	1.00622e-05	-1.17881e-05	2.36159e-05	-4.98306e-05	-1.60612e-05	4.31194e-05	4.10205e-05	1.11138e-05	3.45874e-05	-1.47679e-05	3.44916e-06	-4.79065e-06	1.56456e-05	-3.93865e-05	-2.41957e-05	-2.1607e-05	-4.20872e-06	4.01821e-05	6.38246e-05	-7.9416e-05	5.98089e-07	-0.000121699	-0.000400124	-0.00072403	-0.000558003
457.47	0	-4.68828e-06	-2.74888e-05	-4.56432e-05	-1.03748e-05	1.45932e-05	1.15574e-05	1.53285e-06	-1.41521e-05	2.90412e-05	2.13996e-05	1.84183e-05	1.54369e-05	1.24556e-05	9.47424e-06	6.49289e-06	3.51155e-06	5.30202e-07	-2.45114e-06	-5.43249e-06	-8.41383e-06	-1.27897e-05	-2.27342e-05	-2.59451e-05	7.43738e-06	4.01413e-05	1.45582e-05	-2.37609e-05	1.74921e-05	-1.56752e-05	3.0173e-05	4.87995e-05	3.98063e-05	2.92385e-05	4.72453e-05	5.80845e-06	2.47898e-05	1.92828e-05	3.4213e-05	2.39541e-06	4.31557e-05	5.14632e-05	1.10726e-05	-6.39981e-05	-7.12791e-07	-8.72125e-05	-0.000357761	-0.000722769	-0.000511782
458.118	0	-5.18553e-06	-1.12389e-05	-9.01077e-06	-1.68099e-05	4.33272e-05	5.58879e-05	1.81181e-05	-3.73196e-05	-3.53333e-05	-6.30676e-06	-6.28551e-06	-6.26426e-06	-6.243e-06	-6.22175e-06	-6.2005e-06	-6.17925e-06	-6.158e-06	-6.13675e-06	-6.1155e-06	-6.09425e-06	-7.5654e-06	1.00906e-07	7.17893e-06	-1.91844e-05	1.91237e-05	-2.80435e-05	-8.2605e-05	-1.96349e-05	2.30925e-05	2.68001e-05	3.61747e-06	2.943e-05	2.90217e-05	8.70533e-06	8.82228e-06	-3.45266e-06	6.18179e-06	-3.64185e-06	-4.68711e-05	2.40613e-05	1.72581e-05	-1.34326e-05	-5.16502e-05	-5.21422e-05	-0.000181098	-0.000458067	-0.000764285	-0.000539347
458.766	0	-1.57066e-05	-4.28745e-05	-3.37591e-05	-1.28042e-05	1.94622e-05	2.0116e-05	2.73163e-05	1.37988e-05	1.05776e-05	7.18561e-06	6.00351e-06	4.82141e-06	3.63931e-06	2.45721e-06	1.27511e-06	9.30071e-08	-1.08909e-06	-2.27119e-06	-3.4533e-06	-4.6354e-06	-4.69689e-06	-2.43788e-05	-3.6058e-05	1.71956e-06	1.76324e-06	1.61118e-05	2.82651e-06	2.10564e-06	2.9171e-05	3.64651e-05	2.60645e-05	2.16856e-05	6.32212e-06	2.11751e-05	-1.91797e-05	-2.10842e-05	3.44834e-05	4.08373e-05	3.64571e-06	3.27667e-05	3.00804e-05	1.70905e-05	-1.51913e-05	-9.99294e-06	-0.00012897	-0.000407394	-0.00072228	-0.000477792
459.415	0	-5.35815e-06	-2.3684e-05	-2.31135e-05	-1.19698e-05	1.5878e-05	1.74338e-05	-1.32733e-06	7.96708e-06	7.68868e-06	-6.085e-07	-5.30589e-07	-4.52677e-07	-3.74766e-07	-2.96855e-07	-2.18944e-07	-1.41032e-07	-6.31211e-08	1.47901e-08	9.27014e-08	1.70613e-07	-1.33749e-05	-2.20749e-05	-1.43574e-05	-2.54186e-05	-4.29845e-06	2.18212e-05	-5.18314e-06	2.0861e-06	5.2282e-05	7.12485e-05	5.49506e-05	2.72687e-05	1.24074e-05	-5.91755e-06	-2.09557e-05	-1.67835e-05	-1.64793e-05	-1.96548e-05	-2.21657e-05	1.92918e-05	2.94431e-05	1.6378e-05	2.57093e-05	9.13087e-06	-0.000101047	-0.000369762	-0.000774387	-0.000529305
460.063	0	-8.83492e-06	-3.50619e-05	-3.14324e-05	-1.39091e-05	2.22635e-05	3.88205e-05	1.18285e-05	-1.23671e-05	1.34065e-05	3.53757e-05	3.52944e-05	3.52132e-05	3.51319e-05	3.50506e-05	3.49694e-05	3.48881e-05	3.48068e-05	3.47256e-05	3.46443e-05	3.4563e-05	3.69759e-05	1.62735e-05	-2.84024e-05	-2.38818e-05	-2.7419e-05	-6.51329e-05	-2.54861e-05	1.14735e-05	1.93833e-05	1.60928e-05	2.0002e-05	1.95295e-05	-1.13935e-05	-1.99236e-05	-1.70576e-05	-1.51892e-05	2.21011e-05	3.59146e-05	1.5467e-05	4.64232e-06	3.428e-05	3.57566e-05	1.48722e-05	-6.00223e-06	-0.000151197	-0.000402095	-0.000722506	-0.000482719
460.711	0	-5.35704e-06	-1.99965e-05	-1.50754e-05	1.16376e-05	3.08659e-05	1.90638e-05	1.08688e-05	-2.94882e-05	-1.99579e-05	-9.13513e-06	-1.02967e-05	-1.14582e-05	-1.26198e-05	-1.37814e-05	-1.49429e-05	-1.61045e-05	-1.7266e-05	-1.84276e-05	-1.95891e-05	-2.07507e-05	7.01295e-06	-7.45031e-06	-1.13703e-05	7.95487e-06	1.10375e-05	-1.9276e-06	-2.19685e-05	-1.28851e-05	1.78229e-05	1.54468e-05	1.91751e-05	7.43604e-06	1.08657e-05	-1.6583e-05	-3.00235e-05	-3.03351e-05	-8.10925e-07	-2.47322e-05	-4.30672e-05	2.58909e-05	3.67945e-05	-1.79625e-05	3.36075e-06	-3.2938e-05	-0.000128634	-0.000377503	-0.000741755	-0.000500343
461.36	0	-4.02089e-05	-7.43313e-05	-2.2748e-05	2.84581e-05	3.13702e-05	1.40316e-05	1.35494e-05	-2.46114e-05	1.7716e-05	3.56433e-05	3.34297e-05	3.12161e-05	2.90025e-05	2.67888e-05	2.45752e-05	2.23616e-05	2.0148e-05	1.79343e-05	1.57207e-05	1.35071e-05	1.48111e-05	9.11215e-06	-1.58591e-06	2.12977e-06	3.07575e-05	-5.60263e-06	-1.83387e-05	1.10895e-05	3.37969e-05	1.63202e-05	6.77587e-06	4.36615e-06	-4.10842e-06	-1.4734e-05	4.40263e-06	9.97481e-08	-2.05885e-05	-3.54658e-05	-2.24991e-05	-3.89661e-06	4.6774e-05	1.19072e-05	1.01672e-06	-5.64195e-06	-0.000109375	-0.000399212	-0.000769724	-0.000498138
462.008	0	-2.54326e-05	-4.27323e-05	-2.98791e-05	-1.16622e-06	2.74876e-05	1.01243e-05	1.45501e-05	1.76108e-06	1.86971e-05	2.57142e-05	2.44289e-05	2.31435e-05	2.18581e-05	2.05727e-05	1.92873e-05	1.80019e-05	1.67165e-05	1.54312e-05	1.41458e-05	1.28604e-05	1.69291e-06	1.31502e-05	2.00859e-05	-1.92328e-05	-1.59038e-05	-4.14374e-05	-1.66073e-06	9.96002e-06	-5.77e-07	1.3875e-05	4.80545e-06	-1.78474e-05	-1.26351e-06	-1.53252e-05	-5.45756e-06	-4.67304e-06	-5.95874e-06	-5.10013e-05	-4.75207e-06	6.61555e-06	-4.17845e-06	-4.21686e-05	2.85035e-06	-3.57123e-05	-0.000133336	-0.000418227	-0.000753709	-0.000519031
462.657	0	3.12115e-06	-9.16375e-06	-1.78004e-05	-4.74366e-05	-1.37198e-05	-2.227e-06	1.05381e-05	-2.68641e-06	2.32584e-05	7.56344e-06	4.27296e-06	9.82472e-07	-2.30801e-06	-5.5985e-06	-8.88899e-06	-1.21795e-05	-1.547e-05	-1.87604e-05	-2.20509e-05	-2.53414e-05	3.75448e-05	-2.36621e-06	-1.69465e-05	3.49831e-05	-3.03271e-05	-3.05414e-05	5.12879e-05	3.21911e-05	3.62536e-05	5.24527e-05	5.46416e-05	3.66658e-05	2.38077e-05	2.28887e-05	2.55071e-05	3.42311e-05	3.18027e-05	-1.86766e-05	2.81723e-05	4.25407e-05	6.30028e-05	4.99496e-06	1.88354e-05	-1.33859e-05	-4.33052e-05	-0.000352997	-0.000773265	-0.000539526
463.305	0	-1.07461e-05	-3.53627e-05	-7.43167e-06	-5.49743e-06	2.34508e-05	1.21181e-05	2.0835e-05	-1.5973e-05	-6.6156e-06	1.39947e-05	1.29818e-05	1.19689e-05	1.09561e-05	9.94318e-06	8.9303e-06	7.91743e-06	6.90455e-06	5.89167e-06	4.8788e-06	3.86592e-06	-7.70073e-06	1.48591e-05	2.94254e-05	-9.31904e-06	5.78566e-05	-2.91865e-05	-1.81848e-05	2.9968e-05	4.45638e-05	6.82941e-06	1.41469e-05	-1.51698e-05	-1.14295e-05	2.35425e-05	2.68263e-05	-1.19444e-05	5.57543e-05	-2.92513e-05	7.3772e-06	-7.02819e-06	7.07612e-06	-1.07707e-05	1.50756e-05	-2.48461e-05	-9.82568e-05	-0.000410767	-0.000775458	-0.000589006
463.954	0	-1.06177e-05	-3.22159e-06	4.57599e-06	-9.80409e-06	2.27492e-05	1.03932e-05	-4.60974e-06	-4.51404e-05	9.68571e-06	5.57479e-05	5.47968e-05	5.38457e-05	5.28947e-05	5.19436e-05	5.09925e-05	5.00414e-05	4.90903e-05	4.81392e-05	4.71881e-05	4.6237e-05	3.35406e-05	1.12858e-05	3.07478e-05	3.2532e-06	4.54632e-05	-1.1767e-05	2.76421e-05	3.10787e-05	8.2928e-05	-1.60418e-05	6.81596e-05	9.38793e-06	4.51091e-05	3.93058e-06	-1.04884e-05	2.00903e-05	2.31253e-05	-9.58167e-06	-2.76948e-05	2.78079e-05	4.36013e-05	1.63685e-05	2.98385e-05	-3.82751e-05	-8.11342e-05	-0.000360992	-0.000710879	-0.000594946
464.603	0	-2.33492e-05	-3.50647e-05	1.81179e-05	9.65761e-06	3.16801e-05	2.411e-05	1.97396e-05	-3.87401e-05	-2.6848e-05	-6.89832e-06	-8.31495e-06	-9.73158e-06	-1.11482e-05	-1.25648e-05	-1.39815e-05	-1.53981e-05	-1.68147e-05	-1.82314e-05	-1.9648e-05	-2.10646e-05	1.58835e-06	3.01085e-05	2.98182e-05	-2.95056e-06	5.70496e-05	-4.67632e-05	-2.36662e-05	2.07982e-05	6.00011e-05	1.17898e-05	4.29994e-05	-2.91536e-05	2.54823e-05	-1.1589e-06	3.43477e-05	1.31397e-05	-2.04169e-06	2.07339e-05	7.33987e-05	2.4167e-06	2.85426e-05	-4.32233e-05	3.08516e-06	-6.70662e-05	-7.2667e-05	-0.000383898	-0.000728058	-0.000652411
465.252	0	-1.78689e-05	-4.4434e-05	-7.02341e-06	1.15976e-05	2.60237e-05	-3.39421e-07	-8.55852e-06	-8.65119e-06	1.88563e-05	1.82626e-05	1.66486e-05	1.50345e-05	1.34205e-05	1.18064e-05	1.01923e-05	8.57826e-06	6.96419e-06	5.35013e-06	3.73606e-06	2.122e-06	1.38934e-05	-3.76367e-05	1.04632e-05	-4.41557e-05	4.04411e-06	-5.4871e-05	1.61568e-06	-9.79179e-06	1.52113e-05	6.57331e-05	-6.44019e-06	-8.66772e-06	-4.70162e-05	3.26075e-05	3.87105e-05	-3.09746e-05	-9.06157e-06	-4.86318e-05	-3.86196e-05	1.93297e-05	-5.85244e-07	1.75858e-05	6.30921e-06	-4.13349e-05	-0.000109426	-0.000374656	-0.000739389	-0.000696588
465.901	0	-1.80563e-05	-1.86167e-05	5.01994e-06	-2.48076e-07	1.15789e-05	-1.57288e-05	-2.51134e-05	-1.06857e-05	4.25182e-05	3.74171e-05	3.48098e-05	3.22026e-05	2.95953e-05	2.69881e-05	2.43808e-05	2.17736e-05	1.91664e-05	1.65591e-05	1.39519e-05	1.24858e-05	2.63928e-05	1.11989e-06	2.1176e-05	-8.42099e-06	-2.9191e-05	-6.3232e-05	1.52889e-05	5.44753e-05	0.000106864	-6.69009e-06	4.1938e-05	2.67689e-05	5.48748e-05	-5.61194e-06	-3.0599e-05	-2.07947e-05	2.32751e-05	3.65291e-05	2.37065e-05	3.47391e-05	1.28482e-05	-6.27224e-06	5.48036e-05	-1.44868e-05	-8.45902e-05	-0.000347614	-0.000695088	-0.000678641
466.55	0	3.04107e-06	-2.14265e-05	-7.98132e-06	-3.13341e-05	1.24396e-05	-3.91906e-06	-6.18652e-06	-3.56742e-06	2.59699e-05	2.64941e-05	2.46301e-05	2.27661e-05	2.0902e-05	1.9038e-05	1.7174e-05	1.531e-05	1.3446e-05	1.15819e-05	9.71791e-06	6.23137e-06	-5.73573e-06	3.37675e-06	-1.17249e-05	-2.98888e-05	1.77285e-05	-2.08027e-05	1.74038e-05	-2.06701e-05	1.6764e-05	5.23345e-05	6.77381e-05	5.60664e-05	1.93766e-05	2.40891e-05	3.97132e-05	1.45928e-05	-3.84204e-05	-4.28732e-05	1.55509e-05	3.18333e-05	2.72927e-05	5.33836e-06	1.54657e-05	-3.43334e-05	-7.02574e-05	-0.00039422	-0.000707108	-0.00063639
467.199	0	2.49241e-06	-3.01102e-05	-1.30662e-05	-2.06443e-05	2.20823e-05	2.22689e-05	9.8815e-06	-3.72854e-05	3.08786e-06	3.70339e-05	3.60415e-05	3.5049e-05	3.40566e-05	3.30642e-05	3.20718e-05	3.10793e-05	3.00869e-05	2.90945e-05	2.81021e-05	2.49789e-05	6.54961e-07	-5.46142e-05	-1.35131e-05	2.5008e-05	2.23277e-05	-3.09299e-05	2.21511e-05	7.72599e-06	-3.49364e-06	9.22014e-06	2.47184e-05	-2.58898e-05	-2.42555e-05	-1.54147e-05	3.04836e-06	8.98553e-06	3.67571e-05	-1.00317e-06	3.89079e-05	-3.02564e-05	2.1254e-06	-2.1631e-05	-1.16923e-05	-2.1027e-05	-9.80896e-05	-0.000392458	-0.000748338	-0.000669744
467.848	0	-3.03836e-05	-4.53038e-05	-3.16077e-06	8.69212e-06	1.14827e-05	-3.89538e-06	1.10159e-05	-4.31948e-06	1.4133e-05	-1.42529e-05	-1.77564e-05	-2.126e-05	-2.47636e-05	-2.82672e-05	-3.17708e-05	-3.52744e-05	-3.8778e-05	-4.22816e-05	-4.57852e-05	-3.04008e-05	1.19719e-05	-5.9403e-06	5.42599e-05	-5.41741e-06	-2.0068e-05	-5.48711e-05	-1.46272e-05	5.74097e-06	1.27901e-05	2.94367e-05	5.45125e-05	-6.74895e-08	-4.51995e-05	-9.91362e-06	7.18342e-05	2.5882e-05	5.31232e-05	-1.96744e-05	5.98722e-05	7.89616e-06	-1.83374e-05	-8.53347e-07	-3.17623e-06	-2.09426e-05	-7.81334e-05	-0.00036847	-0.000714314	-0.000674403
468.497	0	-6.38544e-05	-3.59707e-05	1.2807e-05	1.56139e-05	4.54517e-05	4.11959e-05	2.67747e-05	-2.68051e-05	-7.35276e-06	1.44266e-05	1.35993e-05	1.2772e-05	1.19447e-05	1.11174e-05	1.029e-05	9.46273e-06	8.63541e-06	7.80809e-06	6.98077e-06	1.68292e-06	-1.30319e-05	-2.3795e-05	-1.32368e-05	1.87919e-05	2.50174e-06	-1.96679e-05	-9.33482e-06	2.08997e-05	6.88983e-05	4.49334e-05	4.53232e-05	7.19797e-06	7.12901e-06	1.35168e-05	3.4774e-05	-2.01613e-05	-2.7712e-05	-7.0122e-06	-3.57013e-05	1.19716e-05	2.28219e-05	-1.41969e-05	6.4396e-06	-3.30741e-05	-8.44923e-05	-0.000368973	-0.000771235	-0.000682683
469.146	0	-3.1227e-05	-4.61762e-05	-4.1575e-05	-1.63823e-05	3.14121e-05	3.48767e-06	-5.79923e-06	1.1306e-05	5.66659e-05	3.61996e-05	3.31248e-05	3.00499e-05	2.69751e-05	2.39003e-05	2.08255e-05	1.77506e-05	1.46758e-05	1.1601e-05	8.52612e-06	1.5402e-05	2.37136e-05	2.6321e-05	4.25351e-05	3.12295e-05	3.71008e-05	1.07271e-05	-3.0655e-05	-3.10613e-05	-9.27211e-07	-7.16643e-07	-4.17827e-06	-3.17545e-05	3.12182e-05	1.71775e-05	-6.62681e-06	-1.62513e-05	-1.64976e-05	-2.8215e-05	3.25839e-05	3.7753e-05	3.28358e-05	9.85449e-06	-2.83552e-07	-4.06828e-05	-0.00012149	-0.000367741	-0.000729677	-0.000665212
469.795	0	-3.02153e-05	-2.15057e-05	-1.58583e-05	1.7137e-06	1.62426e-05	-2.62321e-05	6.39104e-06	7.79141e-07	5.07766e-05	6.80511e-05	6.60783e-05	6.41056e-05	6.21328e-05	6.01601e-05	5.81874e-05	5.62146e-05	5.42419e-05	5.22692e-05	5.02964e-05	3.19267e-05	1.47863e-05	1.91132e-05	2.78867e-07	8.3869e-06	3.06883e-05	1.67502e-05	-1.27896e-05	-2.24448e-05	3.25992e-05	4.74533e-05	8.39977e-06	-2.91567e-05	2.33397e-05	3.32852e-05	2.73255e-05	2.08103e-05	3.83661e-06	1.03941e-05	5.47123e-05	6.75352e-05	3.92022e-05	1.31108e-05	4.03177e-06	-5.48109e-06	-4.8321e-05	-0.000351658	-0.000775517	-0.000717363
470.445	0	-3.45548e-05	-3.56298e-05	3.86154e-06	7.28243e-06	2.63878e-05	2.84496e-05	-4.8385e-06	-4.21762e-05	2.55999e-05	3.78345e-05	3.53825e-05	3.29305e-05	3.04784e-05	2.80264e-05	2.55744e-05	2.31223e-05	2.06703e-05	1.82182e-05	1.57662e-05	1.12469e-05	4.19246e-05	7.54233e-05	2.62417e-05	1.06778e-05	2.91579e-05	1.63756e-05	3.01521e-05	5.17905e-05	6.29688e-05	5.51368e-05	2.05327e-05	-1.20018e-05	1.12707e-05	3.83642e-05	3.04359e-05	4.50282e-05	3.38524e-05	1.12846e-05	4.95591e-06	-3.59135e-05	-2.12395e-05	2.37927e-05	-4.45195e-06	-3.48913e-05	-0.000100444	-0.000379714	-0.000780241	-0.000712638
471.094	0	1.64121e-06	-2.47649e-05	-5.55542e-06	2.59558e-07	2.36634e-05	5.11707e-06	5.52834e-06	-2.63191e-05	4.36304e-06	3.08328e-05	3.02292e-05	2.96256e-05	2.9022e-05	2.84184e-05	2.78148e-05	2.72112e-05	2.66076e-05	2.6004e-05	2.54003e-05	4.54013e-05	3.1433e-05	7.3423e-06	-3.93354e-06	1.35353e-05	1.08766e-05	4.50221e-05	5.65978e-05	4.5514e-05	4.56185e-05	5.51845e-05	3.11353e-05	1.9749e-05	2.40467e-05	-4.8212e-06	2.63694e-05	5.54177e-05	-3.58886e-06	-1.2718e-05	2.69787e-05	3.72927e-05	2.40279e-05	2.46726e-05	2.81258e-06	-2.08704e-05	-0.000102095	-0.000380369	-0.000760929	-0.000727438
471.743	0	-6.93313e-06	-7.06897e-06	-1.70205e-05	-3.10332e-06	3.7435e-05	-4.78024e-05	-2.1738e-05	-3.50325e-06	2.99004e-05	3.88287e-05	3.73272e-05	3.58258e-05	3.43243e-05	3.28229e-05	3.13214e-05	2.98199e-05	2.83185e-05	2.6817e-05	2.53156e-05	9.92327e-06	1.39475e-06	-1.19262e-05	-1.53346e-05	-9.68828e-06	-3.79662e-05	8.41503e-06	6.17063e-06	5.41668e-05	3.34567e-05	9.16656e-06	-3.70705e-05	-1.96139e-05	-1.32411e-05	2.70628e-05	4.46158e-05	3.85084e-05	1.09666e-05	1.50195e-05	2.42954e-05	2.96551e-05	2.8002e-05	2.163e-05	-7.15211e-06	-3.08932e-05	-0.000125245	-0.000425701	-0.000824627	-0.000791783
472.393	0	1.9232e-05	-9.86902e-06	-4.17848e-07	7.72417e-06	5.7046e-06	-1.53766e-05	9.22945e-07	-3.46821e-05	-8.37558e-07	2.33484e-05	2.23922e-05	2.14359e-05	2.04796e-05	1.95234e-05	1.85671e-05	1.76109e-05	1.66546e-05	1.56984e-05	1.47421e-05	2.37712e-05	6.57307e-09	-6.73745e-08	5.32415e-05	5.75817e-05	1.55606e-05	5.36358e-05	3.08714e-05	3.80957e-05	2.33898e-05	2.10781e-05	2.84445e-05	2.23127e-05	1.93765e-05	2.67646e-05	5.75162e-06	1.93906e-05	4.95533e-05	9.35207e-05	6.17743e-05	4.64663e-05	2.51679e-05	1.11371e-06	-2.15187e-05	6.42509e-06	-8.64076e-05	-0.00041386	-0.000788012	-0.000798019
473.043	0	-2.2634e-05	-2.48826e-05	3.9041e-06	-1.26844e-05	3.432e-05	1.64405e-05	1.66917e-05	-1.97422e-05	-9.29682e-06	1.208e-05	1.18133e-05	1.15467e-05	1.128e-05	1.10133e-05	1.07466e-05	1.048e-05	1.02133e-05	9.9466e-06	9.67992e-06	6.49006e-05	3.48803e-05	1.30475e-05	7.64752e-07	1.7351e-06	1.26425e-05	5.39608e-07	4.79088e-05	9.39387e-05	5.75831e-05	4.74099e-05	-3.28881e-06	3.93984e-06	1.79806e-05	3.81115e-05	-3.32211e-06	-3.28862e-05	-4.57767e-05	1.40167e-05	2.38053e-05	4.27347e-05	4.07646e-06	1.4046e-05	-6.6434e-05	-8.76582e-05	-0.00010701	-0.000377005	-0.000773433	-0.000808258
473.692	0	-2.06669e-05	-3.42327e-05	-4.29942e-05	-1.28365e-05	2.94503e-05	2.96956e-05	4.03481e-05	4.02536e-06	7.44657e-06	-1.11444e-05	-1.34725e-05	-1.58006e-05	-1.81287e-05	-2.04568e-05	-2.27849e-05	-2.5113e-05	-2.74411e-05	-2.97693e-05	-3.20974e-05	-8.20682e-07	-1.68679e-05	6.05421e-06	2.14427e-05	-2.26904e-05	5.19655e-06	5.10953e-06	-2.6619e-05	3.3635e-05	2.76819e-05	2.92404e-06	9.30229e-06	1.18642e-05	4.16202e-05	3.49248e-05	1.97185e-06	1.53748e-05	1.25094e-05	3.58836e-05	-1.41001e-05	1.21443e-05	1.49067e-05	-1.95191e-05	-1.5553e-05	-2.20921e-05	-7.04385e-05	-0.000394141	-0.000754453	-0.000815227
474.342	0	-4.2207e-06	-3.47538e-06	2.028e-05	-3.19758e-07	1.66491e-05	1.72155e-05	-1.87453e-05	-3.68416e-05	4.98781e-07	1.20637e-05	1.13421e-05	1.06205e-05	9.89891e-06	9.17731e-06	8.45571e-06	7.73411e-06	7.01251e-06	6.29091e-06	5.56931e-06	5.38383e-05	7.82341e-06	2.82073e-06	-4.43302e-05	1.91688e-05	-1.30382e-05	-4.20503e-05	-1.92802e-06	7.38917e-05	6.77642e-05	2.45415e-05	-9.34084e-06	-1.84415e-05	2.5723e-05	4.41427e-05	4.36439e-05	2.26537e-05	-4.61642e-06	1.43481e-05	3.84982e-05	2.43596e-05	-7.22633e-06	4.63418e-05	1.75816e-05	-1.35706e-05	-3.49325e-05	-0.000404203	-0.000769461	-0.000841474
474.992	0	-3.24449e-05	-2.33404e-05	-2.6952e-05	-9.53566e-06	2.39877e-05	1.27467e-05	3.56009e-05	-1.21822e-05	2.57185e-05	4.51798e-05	4.36234e-05	4.2067e-05	4.05107e-05	3.89543e-05	3.73979e-05	3.58415e-05	3.42851e-05	3.27288e-05	3.11724e-05	2.79489e-05	-5.13821e-06	3.78372e-05	-2.3318e-05	4.47806e-05	1.37672e-06	3.63821e-05	-4.20793e-05	3.00834e-05	2.96286e-05	4.38762e-05	1.78896e-05	2.36493e-05	2.12198e-05	1.92783e-05	-4.73576e-05	-2.71308e-05	-2.57964e-06	2.70368e-05	9.54429e-05	1.94334e-05	8.03465e-06	6.19747e-06	8.06618e-07	-4.80048e-06	-3.36016e-05	-0.000319531	-0.000717808	-0.000858398
475.641	0	2.09987e-05	-1.71761e-05	3.92375e-06	2.5903e-06	8.84317e-06	-1.85913e-05	6.77846e-06	-1.71315e-05	-2.50269e-05	1.08411e-05	1.23581e-05	1.38751e-05	1.5392e-05	1.6909e-05	1.8426e-05	1.99429e-05	2.14599e-05	2.29769e-05	2.44938e-05	-2.2347e-05	-2.20805e-05	2.25445e-05	-2.10696e-06	5.7695e-05	-7.4004e-06	3.67168e-05	4.06172e-05	3.67002e-05	5.0304e-05	8.27853e-05	7.01132e-06	7.10552e-06	-3.92666e-06	5.72688e-05	5.04299e-05	2.32595e-05	7.07393e-06	6.62509e-05	5.91255e-05	-2.39586e-06	-3.81609e-05	1.68667e-05	-2.02742e-05	-5.63588e-05	-7.05362e-05	-0.000307436	-0.000707982	-0.000896265
476.291	0	-1.53918e-05	-6.5977e-06	1.97057e-05	1.3924e-05	4.26312e-05	4.756e-06	9.42996e-06	-3.01113e-05	-9.04092e-06	1.27997e-05	1.22064e-05	1.1613e-05	1.10197e-05	1.04264e-05	9.83302e-06	9.23968e-06	8.64634e-06	8.053e-06	7.67692e-06	4.25945e-05	-1.87381e-05	1.6435e-05	3.93413e-05	3.7029e-05	-5.50368e-05	-3.52043e-05	-1.78774e-05	2.87641e-05	-1.59551e-05	8.8245e-06	-2.72586e-05	-1.25179e-06	2.42397e-05	3.73477e-05	1.31764e-05	5.70215e-05	2.99732e-05	9.85967e-05	1.834e-05	2.30493e-05	2.35663e-05	4.89361e-05	-4.58204e-05	1.28907e-05	-7.76233e-05	-0.000302264	-0.000717648	-0.000832082
476.941	0	-9.09321e-06	-2.28188e-05	-2.06815e-05	-2.55154e-05	3.92484e-08	2.6784e-05	8.95293e-06	5.54634e-06	1.04396e-05	1.31922e-05	1.33896e-05	1.3587e-05	1.37843e-05	1.39817e-05	1.4179e-05	1.43764e-05	1.45737e-05	1.47711e-05	1.44319e-05	8.04515e-06	2.64545e-05	-1.81814e-05	2.5089e-05	-3.01236e-06	-3.91834e-05	8.82899e-06	1.02506e-05	3.33211e-05	-1.94886e-05	1.97327e-05	-1.36248e-05	2.94208e-05	-1.18265e-05	8.3641e-05	8.93893e-05	7.47394e-06	-6.23044e-05	1.51137e-05	3.93351e-05	2.43097e-05	-3.6822e-05	9.31012e-06	-3.61733e-05	-2.5012e-05	-2.62437e-05	-0.000322508	-0.000740022	-0.000857978
477.591	0	6.28247e-06	-2.83231e-05	-1.831e-05	-3.38218e-05	1.73704e-05	3.24056e-05	1.91898e-05	5.61546e-06	-1.36997e-05	2.37364e-05	2.6478e-05	2.92196e-05	3.19611e-05	3.47027e-05	3.74443e-05	4.01859e-05	4.29275e-05	4.5669e-05	4.75542e-05	4.53027e-05	5.6212e-05	3.39165e-05	-4.54778e-05	1.67063e-05	-3.11927e-05	2.21613e-05	-1.6399e-05	-1.52783e-05	1.97804e-05	1.21799e-05	-2.93078e-06	3.34389e-05	-6.65843e-07	3.32554e-05	6.14492e-06	-6.5162e-05	-3.33168e-06	-1.60347e-06	1.43523e-05	4.50446e-05	3.13634e-06	4.71871e-05	-1.92184e-05	-2.34666e-05	-6.22802e-05	-0.000334171	-0.000704915	-0.000762323
478.241	0	-2.32399e-05	-3.17285e-05	-2.53932e-05	1.20369e-05	4.10677e-05	1.96277e-05	1.49817e-05	-1.6154e-05	-3.51448e-06	2.36662e-05	2.42502e-05	2.48342e-05	2.54183e-05	2.60023e-05	2.65863e-05	2.71703e-05	2.77544e-05	2.83384e-05	3.02584e-05	3.34244e-05	3.33637e-06	-4.37997e-05	2.74719e-05	3.15073e-05	1.16602e-05	1.95569e-05	5.15938e-07	3.19496e-05	1.25944e-05	1.48967e-05	-1.03087e-05	1.77695e-05	-3.85718e-06	1.27355e-05	2.96733e-05	-1.17783e-05	3.11967e-05	1.36766e-05	-3.564e-05	-6.00658e-05	-1.62955e-05	-1.559e-05	-4.3301e-05	2.68448e-05	-9.93783e-05	-0.000351582	-0.000739278	-0.000805015
478.892	0	-7.16117e-06	-7.21681e-06	-3.02933e-05	-3.65635e-05	3.60953e-05	1.53237e-05	-5.76175e-06	-2.73585e-05	1.77976e-05	3.03804e-05	2.91756e-05	2.79708e-05	2.6766e-05	2.55611e-05	2.43563e-05	2.31515e-05	2.19467e-05	2.07419e-05	8.27995e-06	-2.89046e-05	-2.46621e-05	-1.15444e-05	1.8777e-05	-1.81709e-05	-1.80936e-05	3.56672e-05	-3.45053e-06	-2.17522e-05	-1.39922e-06	4.54922e-05	2.64871e-05	-1.13458e-05	2.52705e-05	2.07073e-05	-4.14168e-06	-2.57827e-05	1.95195e-05	2.45609e-05	1.94995e-06	-2.45119e-05	-4.81142e-05	-1.53882e-05	-5.41967e-05	-4.29772e-05	-0.000124402	-0.000373141	-0.000768584	-0.000782331
479.542	0	-1.02635e-05	-1.99052e-05	-6.83916e-06	5.03545e-06	4.57965e-05	2.81313e-05	1.74667e-05	-4.69239e-05	-1.01217e-05	-3.70732e-05	-4.11656e-05	-4.5258e-05	-4.93504e-05	-5.34428e-05	-5.75352e-05	-6.16276e-05	-6.572e-05	-6.98124e-05	-5.26498e-05	-1.10472e-05	-1.38312e-05	3.25812e-05	3.37826e-05	2.42382e-05	2.78806e-05	2.22835e-05	-1.1707e-05	3.0134e-05	3.46313e-05	2.66285e-05	-1.4243e-05	-2.95883e-05	-1.2713e-05	-1.60515e-06	-4.67261e-06	-6.02258e-07	-9.65333e-06	5.53359e-05	2.47895e-05	9.6518e-06	3.78087e-05	3.53886e-05	1.68956e-05	5.69691e-06	-8.63027e-05	-0.00030002	-0.000712788	-0.000741202
480.192	0	-1.20026e-05	-3.56751e-05	1.61874e-05	6.44049e-07	-7.33905e-06	1.73682e-05	-1.44701e-06	-1.41138e-05	1.70274e-05	4.80487e-05	4.89682e-05	4.98877e-05	5.08072e-05	5.17266e-05	5.26461e-05	5.35656e-05	5.44851e-05	5.54046e-05	4.33262e-05	1.24162e-05	-1.25161e-06	-5.40535e-06	9.65086e-06	-2.25326e-06	-5.8546e-05	5.56974e-06	1.93944e-05	4.88895e-05	5.00243e-06	-1.28184e-06	1.99817e-05	1.14842e-05	-8.18574e-06	4.73541e-05	3.63019e-05	-2.12979e-05	-5.91003e-05	-4.756e-05	-2.59284e-05	-1.13424e-05	-2.15962e-06	-1.13158e-05	-6.98162e-05	-7.14235e-05	-6.972e-05	-0.000306533	-0.00070292	-0.000713111
480.842	0	2.70749e-05	3.59344e-06	-8.13187e-06	-2.84988e-05	-4.09622e-06	-4.31524e-05	-2.16907e-05	2.51034e-06	3.96486e-05	3.91417e-05	3.78722e-05	3.66028e-05	3.53334e-05	3.40639e-05	3.27945e-05	3.1525e-05	3.02556e-05	2.89862e-05	1.27361e-05	-7.46622e-07	2.68289e-05	2.15417e-05	3.8875e-06	2.60024e-05	3.13392e-05	3.76603e-05	3.67854e-05	6.37617e-05	6.77258e-05	7.29597e-05	4.16145e-05	3.38333e-05	4.83523e-05	6.82941e-05	4.05271e-05	6.59449e-05	3.30285e-05	2.44328e-05	8.5084e-06	4.12149e-05	4.03287e-05	1.51095e-05	-1.26461e-05	-2.03571e-05	-7.19935e-05	-0.000324469	-0.00068631	-0.000690187
481.493	0	-1.19199e-05	-2.63044e-05	3.73735e-06	-2.43732e-05	3.89173e-05	2.78171e-05	3.00917e-05	-1.11769e-05	-2.17363e-05	-1.01834e-05	-1.00943e-05	-1.00051e-05	-9.91597e-06	-9.82682e-06	-9.73767e-06	-9.64853e-06	-9.55938e-06	-9.47023e-06	1.67128e-05	4.04212e-05	4.19821e-05	2.42734e-05	-1.45201e-05	-1.34798e-05	8.52539e-06	3.46909e-05	4.36132e-05	4.14561e-05	2.19452e-05	-1.46984e-05	-1.13863e-05	3.19261e-05	2.59913e-05	2.2439e-05	2.04164e-05	6.38755e-06	9.53677e-07	-5.91376e-06	-1.0846e-05	-1.94525e-05	1.1203e-05	2.7158e-05	-3.06933e-05	-8.29764e-06	-4.8066e-05	-0.000293584	-0.000638342	-0.000707878
482.143	0	-1.35674e-05	1.82305e-06	-8.59401e-07	4.36025e-06	2.59747e-05	-2.75821e-06	3.452e-06	-5.71078e-05	1.27027e-05	3.36694e-05	3.15864e-05	2.95034e-05	2.74204e-05	2.53374e-05	2.32544e-05	2.11714e-05	1.90885e-05	1.70055e-05	1.70592e-05	2.08615e-05	1.91825e-06	4.25743e-06	3.16275e-05	1.4246e-05	2.49957e-05	2.82179e-05	9.59108e-06	4.36415e-07	1.24798e-05	1.79101e-05	-2.09776e-05	-2.25723e-05	2.62515e-05	3.30016e-05	2.83038e-05	1.27632e-05	-4.61792e-06	1.68693e-05	6.12594e-06	-5.7985e-06	1.45136e-05	3.68736e-06	-1.29779e-05	2.35571e-05	-5.63387e-05	-0.000376651	-0.000681205	-0.000679753
482.794	0	-9.38272e-06	-2.61243e-05	-4.49194e-05	-2.21674e-05	7.94898e-06	3.12092e-05	2.18803e-05	-2.18208e-05	3.07473e-05	5.68804e-05	5.62955e-05	5.57105e-05	5.51256e-05	5.45407e-05	5.39558e-05	5.33708e-05	5.27859e-05	5.2201e-05	2.59086e-05	4.93023e-06	1.80459e-05	3.09502e-05	5.98348e-06	-1.07931e-05	2.06858e-05	4.5833e-06	2.36877e-05	5.97949e-05	2.92292e-05	7.6424e-06	2.94381e-05	-6.72672e-07	-4.79803e-07	-8.54713e-06	-2.93627e-05	9.02333e-06	2.89636e-05	-5.66864e-06	-3.73954e-05	-4.20485e-05	-1.94303e-05	-2.34255e-05	-2.58843e-05	-1.0415e-05	-5.91177e-05	-0.000321868	-0.000686708	-0.000698495
483.444	0	3.78998e-05	-9.07312e-06	-1.90589e-05	-3.86768e-05	9.26169e-06	1.13522e-05	1.52458e-05	-1.90236e-05	7.48425e-06	2.03e-05	1.95921e-05	1.88841e-05	1.81762e-05	1.74682e-05	1.67602e-05	1.60523e-05	1.53443e-05	1.46364e-05	3.44193e-05	3.46966e-05	-3.30486e-06	1.37777e-05	1.50133e-05	2.40577e-06	5.63064e-05	5.12968e-05	6.22515e-05	2.64809e-05	4.23782e-05	1.29033e-05	4.4199e-06	-4.90942e-06	4.025e-05	3.66554e-05	2.97e-06	3.07624e-05	6.88339e-05	6.21642e-05	3.23078e-05	1.32212e-05	1.24101e-05	-2.5666e-05	-4.28229e-05	-2.9957e-05	-9.04195e-05	-0.000365422	-0.000692563	-0.000732346
484.095	0	4.45141e-06	1.72758e-05	-7.12948e-06	-6.06962e-05	-2.02958e-06	-1.30284e-05	-6.97184e-06	9.20173e-06	3.62218e-05	5.67467e-05	5.71788e-05	5.76109e-05	5.8043e-05	5.8475e-05	5.89071e-05	5.93392e-05	5.97713e-05	6.02034e-05	3.26474e-05	1.66985e-05	4.11923e-05	4.00277e-05	4.98349e-05	5.82406e-05	6.83391e-05	2.01045e-05	3.15691e-05	4.42153e-05	3.09378e-05	2.32044e-05	2.33837e-05	1.17915e-05	-1.56152e-05	3.1676e-05	5.37379e-05	4.19756e-05	5.25772e-05	5.9849e-05	5.0914e-06	1.46632e-05	1.8695e-05	-4.15444e-05	-2.3107e-05	3.66239e-07	-4.06292e-05	-0.000310852	-0.00060735	-0.000729367
484.746	0	-1.10375e-05	7.05791e-06	2.30725e-05	1.39187e-06	-1.65111e-05	-3.52394e-05	3.16434e-05	-8.54195e-06	-4.11498e-06	-2.19417e-05	-2.42682e-05	-2.65946e-05	-2.8921e-05	-3.12474e-05	-3.35738e-05	-3.59002e-05	-3.82266e-05	-4.05531e-05	2.05814e-05	-1.33089e-05	5.26355e-06	5.36629e-06	1.36351e-05	6.14185e-06	3.81746e-05	1.26394e-05	2.77968e-05	4.04114e-05	3.23626e-05	-1.01488e-06	-1.73499e-05	-2.91501e-05	-1.27211e-05	6.60224e-06	-8.74169e-06	-6.04418e-06	3.60641e-05	2.79966e-05	-1.55709e-05	-1.12569e-05	4.15765e-05	-1.70596e-05	-3.51524e-06	2.33523e-05	-4.69893e-05	-0.00031858	-0.000644906	-0.000765646
485.397	0	-2.44092e-06	-1.52295e-05	4.50532e-06	-1.48024e-05	1.76367e-05	-9.88361e-06	-7.65679e-06	-1.61127e-05	-1.72902e-06	2.90397e-05	3.0147e-05	3.12543e-05	3.23615e-05	3.34688e-05	3.45761e-05	3.56834e-05	3.67907e-05	3.7898e-05	5.02131e-05	2.1494e-05	5.67023e-05	2.6077e-06	5.03848e-05	6.81383e-06	4.51627e-05	1.32383e-05	7.02797e-05	2.57971e-05	2.46303e-05	-1.07517e-05	-3.88069e-06	3.95729e-05	1.6937e-05	2.02356e-05	3.49484e-05	1.66344e-05	2.64053e-05	4.97645e-05	3.12886e-05	1.05841e-05	1.7644e-05	-1.30797e-05	-1.63362e-05	-3.14975e-05	-6.6195e-05	-0.00035489	-0.000636648	-0.000793183
486.048	0	2.16144e-05	4.83255e-06	-3.33737e-06	-3.12976e-05	-8.14514e-06	-3.16786e-06	2.93281e-05	-7.35072e-06	4.87479e-06	1.53797e-05	1.48698e-05	1.43599e-05	1.385e-05	1.33401e-05	1.28302e-05	1.23203e-05	1.18104e-05	1.13005e-05	2.62634e-05	2.76529e-05	1.74043e-05	1.01426e-05	5.37998e-06	-4.68498e-06	-1.49474e-05	-1.68344e-05	6.00419e-05	5.25098e-05	2.82494e-05	-4.12903e-05	1.06752e-05	1.75349e-05	4.49834e-06	-3.81613e-06	-1.16588e-06	-1.43203e-05	6.43271e-06	1.74005e-05	-1.77506e-05	7.88913e-06	-2.69809e-05	-8.77965e-05	-2.40371e-05	-3.01819e-05	-6.40491e-05	-0.000326884	-0.000591628	-0.000843491
486.698	0	-6.2685e-06	4.94972e-06	-1.47547e-05	-2.17983e-05	1.19922e-05	-3.00592e-07	2.33702e-05	-1.33536e-05	1.79123e-05	1.97411e-05	1.82113e-05	1.66815e-05	1.51518e-05	1.3622e-05	1.20922e-05	1.05624e-05	9.03267e-06	7.50289e-06	9.63942e-06	-3.97336e-05	-1.7089e-05	-4.3073e-06	-5.45347e-05	-3.64333e-05	5.44415e-06	1.5021e-05	-2.07779e-07	2.9851e-05	4.14634e-05	-3.64787e-06	-5.87943e-05	-3.0879e-06	-4.86193e-07	1.98608e-05	1.30583e-05	-3.63075e-06	-2.48517e-05	-9.64383e-06	5.60739e-06	-3.22706e-05	2.3221e-05	-1.31528e-05	-1.91053e-05	-1.79442e-05	-0.000101821	-0.00030947	-0.000645568	-0.000880005
487.349	0	-1.43096e-05	-1.13819e-05	-3.21221e-05	1.08367e-05	5.35675e-05	1.57182e-05	-2.19025e-05	-2.73189e-06	9.70272e-06	4.14422e-05	4.33236e-05	4.5205e-05	4.70864e-05	4.89677e-05	5.08491e-05	5.27305e-05	5.46119e-05	5.64933e-05	1.92604e-05	2.59862e-05	-5.71074e-05	-4.74003e-05	4.20961e-06	-3.57544e-05	5.79571e-06	-6.57081e-05	-1.618e-05	-1.80457e-05	-1.64956e-05	-1.76199e-06	7.02156e-05	-2.74756e-05	3.4414e-06	-4.12772e-05	8.43053e-06	-1.48031e-05	-4.43277e-06	-3.71189e-06	9.96318e-06	-2.77063e-05	3.04458e-05	-1.36392e-05	-6.49912e-05	-9.65939e-05	-6.00549e-05	-0.000298952	-0.000617661	-0.00088386
488	0	-2.21744e-05	2.52615e-05	2.5944e-05	-1.21363e-06	-4.11705e-07	-1.45548e-06	-2.61429e-05	-3.64594e-05	4.49622e-05	3.07741e-05	2.76776e-05	2.45811e-05	2.14846e-05	1.83881e-05	1.52917e-05	1.21952e-05	9.09869e-06	6.0022e-06	-6.54404e-06	-2.98238e-05	2.03079e-05	8.31146e-06	5.40559e-05	7.35644e-06	8.11548e-05	-2.53302e-05	8.02814e-05	-2.32398e-06	2.07176e-05	-2.66062e-05	2.6061e-06	-1.72478e-05	5.20831e-05	-2.48727e-05	-5.33243e-05	-5.46654e-06	-1.25561e-05	1.69866e-05	3.84182e-06	-3.12942e-05	6.40075e-05	2.59678e-07	-5.07924e-05	-1.73455e-05	-8.74438e-05	-0.000287604	-0.000638617	-0.0009436
488.652	0	-2.11956e-05	-1.17369e-05	-1.73712e-05	1.08671e-05	5.38683e-05	7.58847e-06	-3.27887e-06	-2.12649e-05	2.17985e-05	3.01671e-05	2.91443e-05	2.81214e-05	2.70986e-05	2.60758e-05	2.5053e-05	2.40302e-05	2.30074e-05	2.16201e-05	9.80274e-06	-2.87222e-05	3.93318e-05	3.79471e-05	4.17667e-05	4.10994e-05	8.42067e-05	2.7779e-05	6.81169e-05	-2.67792e-05	5.40663e-05	3.66797e-07	4.24257e-05	4.99867e-05	7.07245e-06	-2.09758e-05	3.50392e-05	-1.43251e-05	8.72389e-05	-2.75269e-06	-3.78338e-05	-1.15776e-05	4.26834e-05	-3.48294e-05	-1.54714e-05	-2.43355e-05	-4.66402e-05	-0.000239262	-0.000603903	-0.000921091
489.303	0	-3.20509e-05	-1.82608e-05	7.39699e-07	-1.52984e-05	5.92289e-06	1.10221e-06	2.85791e-05	-1.76893e-05	4.8036e-05	1.70539e-05	1.26689e-05	8.28391e-06	3.89889e-06	-4.86124e-07	-4.87114e-06	-9.25615e-06	-1.36412e-05	-1.3001e-05	2.83719e-05	-2.45203e-05	6.59725e-06	5.95243e-06	3.68313e-05	3.14123e-05	-3.35595e-05	3.41838e-05	6.5897e-05	3.32109e-05	-1.67829e-05	-1.59581e-05	1.83924e-05	3.39327e-05	5.85021e-05	4.95033e-05	-3.38948e-05	-3.50856e-05	2.27383e-05	1.70768e-05	-6.40331e-05	-4.00139e-05	9.62171e-08	8.99851e-06	-1.10046e-05	1.12828e-05	-1.16603e-05	-0.000278746	-0.000611093	-0.000921618
489.954	0	1.55222e-05	2.97493e-06	1.52447e-05	1.88056e-05	1.86003e-05	-2.97615e-05	-1.58622e-05	-1.91667e-05	6.61918e-07	2.01022e-05	2.04587e-05	2.08152e-05	2.11718e-05	2.15283e-05	2.18848e-05	2.22413e-05	2.25978e-05	1.96546e-05	6.95682e-06	4.11723e-05	-6.8002e-06	2.40806e-05	6.38538e-05	-1.4999e-05	5.54044e-05	4.4625e-05	6.3492e-05	4.29138e-05	3.14543e-05	3.65169e-05	-2.83858e-05	-8.00043e-06	3.38363e-06	-3.26294e-05	-2.97035e-05	8.50857e-05	0.000117485	1.87968e-05	-2.45371e-05	-4.81934e-05	7.58356e-06	1.38796e-05	1.78402e-05	1.59949e-07	-5.87261e-06	-0.000243372	-0.000634805	-0.000912879
490.605	0	1.92879e-06	2.21264e-05	1.2736e-05	-3.83737e-05	6.75465e-06	-7.60231e-06	-8.55684e-06	-2.1173e-05	9.58351e-06	4.76232e-05	4.87702e-05	4.99172e-05	5.10641e-05	5.22111e-05	5.33581e-05	5.45051e-05	5.5652e-05	5.22437e-05	3.64008e-05	3.98539e-05	2.12411e-05	5.08008e-05	2.83501e-05	-9.14783e-06	5.11131e-05	2.53463e-05	3.59576e-05	1.69528e-05	2.39097e-05	-3.4109e-05	3.33332e-05	3.19246e-05	4.9237e-05	-8.89317e-06	-1.43041e-05	-3.78218e-06	2.13313e-05	4.29267e-05	-6.69374e-05	-3.21845e-05	1.32377e-05	2.14993e-06	-7.12541e-05	-1.46794e-05	-1.34405e-05	-0.000294035	-0.000647911	-0.000890266
491.257	0	-1.49715e-05	-2.37175e-05	-3.40173e-05	-3.70716e-05	2.81361e-05	-6.01209e-06	2.34127e-05	2.01674e-05	2.86561e-05	8.76889e-05	9.05476e-05	9.34063e-05	9.62651e-05	9.91238e-05	0.000101983	0.000104841	0.0001077	8.03239e-05	-1.15799e-05	-1.55334e-05	-1.83078e-05	-9.73479e-06	-3.43092e-05	3.11734e-05	3.65838e-05	-3.0524e-05	4.40537e-05	-1.58594e-06	1.084e-06	1.63694e-05	-4.066e-05	5.5889e-06	5.55274e-05	6.92199e-05	-1.38424e-05	2.65201e-05	5.69515e-05	4.24645e-05	-1.82498e-05	-9.99346e-06	-5.75377e-06	1.38435e-06	-2.41678e-05	-3.82612e-05	2.38778e-05	-0.000231424	-0.000583322	-0.000879794
491.908	0	4.43145e-05	1.3243e-05	1.39906e-05	-2.63784e-05	1.77842e-05	8.53621e-06	6.11904e-06	-5.89987e-05	-3.76458e-05	2.07059e-05	2.27072e-05	2.47085e-05	2.67098e-05	2.87111e-05	3.07123e-05	3.27136e-05	3.47149e-05	2.20515e-05	-1.18016e-05	-4.00872e-06	1.8935e-05	1.58308e-05	5.17271e-06	3.96503e-05	9.2295e-07	-3.5107e-05	1.8839e-05	6.14532e-06	-9.77716e-06	-4.4906e-05	-2.57104e-05	3.82672e-05	7.43061e-05	3.21128e-06	-4.0624e-05	2.66538e-05	6.12075e-05	2.89014e-05	7.44447e-06	1.89837e-05	-4.36283e-05	-4.98223e-05	-6.90473e-05	4.68883e-06	3.65686e-05	-0.000224782	-0.000679634	-0.000860107
492.56	0	4.65605e-05	7.63926e-05	2.31949e-05	-5.73351e-05	1.89238e-05	1.8178e-05	-1.29874e-05	-4.42042e-05	-2.0796e-05	6.41055e-05	6.81075e-05	7.21094e-05	7.61114e-05	8.01133e-05	8.41152e-05	8.81172e-05	9.21191e-05	6.37103e-05	2.45679e-06	1.88369e-05	4.98686e-05	8.22012e-06	-1.36029e-06	5.36538e-05	1.09658e-05	3.23084e-05	6.76332e-05	4.10932e-06	-6.66186e-06	-4.22888e-05	-2.79085e-05	4.5685e-05	5.96148e-05	-4.10574e-05	-5.54294e-05	5.5544e-05	6.14674e-05	-7.09857e-05	-9.11029e-05	-2.1113e-05	-6.61116e-05	-5.47903e-05	-9.3101e-05	-5.88146e-05	4.18536e-05	-0.000193781	-0.000576095	-0.000808979
493.211	0	8.81168e-05	7.58031e-05	-5.72615e-06	-0.000106773	3.85743e-05	4.87294e-06	-3.49665e-05	-5.45285e-05	2.06521e-05	6.66071e-05	6.70996e-05	6.75921e-05	6.80845e-05	6.8577e-05	6.90695e-05	6.95619e-05	7.00544e-05	6.51828e-05	1.53648e-06	-3.76824e-05	3.14113e-05	2.24079e-05	7.44062e-05	7.33708e-05	-8.52686e-05	-3.10279e-05	3.46625e-05	-1.40724e-05	-2.45851e-05	-7.97667e-05	-4.66209e-05	4.16275e-05	7.42972e-05	-6.21949e-06	-5.55323e-05	9.7045e-05	8.15659e-05	-0.000115794	-0.000128733	7.82407e-06	-6.02022e-05	-8.58425e-05	-9.00629e-05	-8.5911e-06	6.75737e-05	-0.000214118	-0.000601389	-0.000787892
493.863	0	0.000132976	0.000131814	4.1764e-05	-0.000176444	-1.51681e-05	5.09846e-05	-2.38782e-05	-0.00011782	-3.11651e-05	0.000135362	0.000142016	0.00014867	0.000155324	0.000161978	0.000168632	0.000175286	0.00018194	9.17859e-05	-3.66746e-05	-7.18048e-06	4.91114e-05	2.10111e-05	5.95632e-05	0.000146961	-2.0601e-05	-7.1896e-05	8.27646e-05	7.2266e-06	-2.24566e-05	-7.1955e-05	-0.000110939	2.2751e-05	9.53794e-05	-5.10665e-05	-0.000121773	4.57514e-05	2.7052e-05	-0.000171493	-0.000155921	-4.14629e-06	-9.16191e-05	-0.000131786	-0.000136286	2.51385e-05	8.1914e-05	-0.000222589	-0.000595889	-0.000765727
494.514	0	0.000215714	0.000166798	3.98014e-05	-0.000170013	3.60834e-05	8.05236e-05	-8.49814e-05	-0.000176471	-7.59797e-05	7.61647e-05	8.2031e-05	8.78972e-05	9.37635e-05	9.96298e-05	0.000105496	0.000111362	0.000117229	0.000102822	-6.95975e-06	1.13043e-05	0.000106337	2.18476e-05	0.000159183	0.000269129	1.41708e-06	8.33153e-06	0.000141847	6.31112e-05	-5.03045e-05	-0.000143259	-9.47716e-06	0.000164641	0.00015048	-6.02498e-05	-3.31966e-05	0.00017384	5.86581e-05	-0.000216382	-0.000126275	6.64531e-05	-4.76905e-05	-0.000118072	-0.000168123	7.29902e-05	0.000202361	-8.93042e-05	-0.000545772	-0.000696398
495.166	0	0.000301907	0.000228144	6.45633e-05	-0.000252838	1.73968e-05	6.35072e-05	-6.4568e-05	-0.000200998	-0.000100931	0.000198759	0.000212348	0.000225937	0.000239527	0.000253116	0.000266705	0.000280294	0.000293883	0.000190845	-2.91811e-05	3.40688e-05	0.000163288	5.53505e-05	0.000260804	0.000327621	-7.86312e-05	4.25061e-07	0.000150994	4.96105e-05	-8.2204e-05	-0.000223044	-5.05398e-05	0.000178947	0.000200607	-7.92127e-05	-5.65401e-05	0.000219983	3.49983e-05	-0.00038762	-0.000134264	8.3416e-05	-7.79322e-05	-0.000205357	-0.000279245	0.000208788	0.000363665	7.37964e-06	-0.000505079	-0.000609808
495.818	0	0.00041149	0.000292644	0.000137403	-0.000357626	-7.36316e-05	8.84784e-05	-8.99401e-05	-0.000279293	-6.94779e-05	0.000291955	0.000306249	0.000320543	0.000334837	0.000349131	0.000363425	0.000377719	0.000392013	0.000168051	-0.000100796	5.12094e-05	0.00015945	4.40306e-06	0.000365205	0.000492383	-5.507e-05	2.07801e-05	0.000188038	4.51255e-05	-0.000176384	-0.000334561	-5.61555e-05	0.000279065	0.000311229	-0.000109933	9.91281e-06	0.000357596	1.4592e-05	-0.000582705	-0.000210577	0.000107689	-0.000119658	-0.000339565	-0.000416352	0.000269982	0.000460859	0.000118827	-0.000501003	-0.000559201
496.47	0	0.000530738	0.00042632	0.000225088	-0.000434784	-5.92544e-05	0.000105364	-0.000192363	-0.000390702	-0.000101321	0.000399981	0.000420646	0.000441311	0.000461976	0.00048264	0.000503305	0.00052397	0.000544635	0.000210743	-9.70168e-05	0.000155197	0.000269932	3.09387e-05	0.000577259	0.000681487	-9.66239e-05	0.000124237	0.000274833	3.61512e-05	-0.000247894	-0.00047984	1.44487e-05	0.000478469	0.00044656	-0.000188088	7.8558e-05	0.000494827	-2.42095e-05	-0.000823318	-0.000152331	0.000168459	-0.000124842	-0.000470443	-0.000518586	0.000530122	0.000660226	0.000275653	-0.000479833	-0.000415475
497.122	0	0.000749574	0.000588811	0.00028578	-0.000573695	1.34569e-05	0.000127475	-0.00028243	-0.000594614	-0.000190936	0.000498845	0.000526587	0.00055433	0.000582072	0.000609815	0.000637557	0.000665299	0.000693042	0.000264109	-8.88994e-05	0.000317678	0.000369657	3.47526e-05	0.000809934	0.000810639	-0.00023528	0.000128229	0.000299283	2.77939e-05	-0.000326469	-0.000587075	8.31755e-05	0.000599477	0.000547925	-0.000258876	0.000159202	0.00064237	-0.000134335	-0.00118	-3.47709e-05	0.000172915	-0.000234812	-0.000614314	-0.00062359	0.000829909	0.00084744	0.000448821	-0.000483956	-0.000325004
497.774	0	0.000985144	0.000746123	0.000371855	-0.000725156	-2.62662e-05	0.000138138	-0.000358213	-0.000790718	-0.000218176	0.00067067	0.000704928	0.000739187	0.000773445	0.000807703	0.000841962	0.00087622	0.000910478	0.000229168	-0.000168363	0.000481456	0.000458674	2.09447e-06	0.00119	0.00112	-0.000304501	0.000218256	0.000422404	5.49281e-05	-0.000450679	-0.000813959	0.000224188	0.000876321	0.000727737	-0.000409663	0.000330975	0.000812352	-0.000223664	-0.00152	4.85967e-05	0.000263192	-0.000232346	-0.000829373	-0.000789173	0.00119	0.00106	0.000678437	-0.00055163	-0.000314888
498.426	0	0.00121	0.000911264	0.000535193	-0.000938641	-3.00672e-05	0.000194954	-0.000494159	-0.00101	-0.00028495	0.000911778	0.000959807	0.00101	0.00106	0.0011	0.00115	0.0012	0.00125	0.000246557	-0.000236432	0.000612723	0.000517433	-0.000160928	0.00151	0.00135	-0.000484906	0.000323617	0.000558569	4.46118e-05	-0.00057824	-0.00103	0.000312868	0.00105	0.000792985	-0.000583596	0.00050818	0.00098865	-0.000418074	-0.00197	0.000236068	0.000273142	-0.000349922	-0.0011	-0.00089995	0.00163	0.00125	0.000855382	-0.00060319	-0.000363559
499.078	0	0.00146	0.00108	0.000603174	-0.00109	-4.99781e-05	0.000286186	-0.000567071	-0.00129	-0.000331079	0.00114	0.0012	0.00126	0.00132	0.00137	0.00143	0.00149	0.00155	0.000227638	-0.000227196	0.000847321	0.000508572	-0.000242437	0.00191	0.00153	-0.000685761	0.000448427	0.00058808	-1.23291e-05	-0.000755286	-0.00134	0.00048876	0.00132	0.000978524	-0.000730154	0.000713923	0.00118	-0.000652214	-0.00246	0.000482731	0.000269643	-0.000518218	-0.00137	-0.00101	0.00218	0.0014	0.00114	-0.000763422	-0.000680635
499.73	0	0.00168	0.00118	0.000686856	-0.00122	-2.60265e-05	0.000323214	-0.000691478	-0.00147	-0.000375019	0.00137	0.00144	0.00151	0.00158	0.00165	0.00171	0.00178	0.00185	0.000169765	-0.000266557	0.00101	0.000617113	-0.000351651	0.00229	0.00169	-0.000842928	0.00065602	0.000723957	-4.27465e-05	-0.000816964	-0.0014	0.000635937	0.00158	0.00111	-0.00094749	0.00099775	0.00131	-0.000867513	-0.00291	0.000750174	0.000305792	-0.000537606	-0.00169	-0.00118	0.00268	0.00149	0.00125	-0.00104	-0.000966381
500.382	0	0.00182	0.00132	0.000793856	-0.00137	-4.19776e-06	0.000326771	-0.000800933	-0.00167	-0.000365223	0.00147	0.00154	0.00161	0.00168	0.00175	0.00182	0.00189	0.00196	6.21302e-05	-0.000233796	0.00121	0.000613749	-0.000434651	0.00272	0.00189	-0.00103	0.00069337	0.0008136	-5.33565e-05	-0.000964446	-0.00159	0.000826311	0.00178	0.00107	-0.00114	0.00119	0.00146	-0.00112	-0.00335	0.00107	0.000280561	-0.000663411	-0.00188	-0.00113	0.00324	0.00157	0.00145	-0.00128	-0.00152
501.035	0	0.00193	0.00138	0.00084035	-0.00144	-2.13786e-05	0.000348483	-0.000795864	-0.00181	-0.000398193	0.00159	0.00166	0.00173	0.00181	0.00188	0.00196	0.00203	0.00211	-8.01093e-05	-0.000276244	0.00142	0.000596058	-0.000538358	0.00307	0.00196	-0.00126	0.000835812	0.000807749	-0.000143285	-0.000945319	-0.00176	0.00114	0.00199	0.00114	-0.00128	0.00147	0.00156	-0.00137	-0.00357	0.00134	0.000218438	-0.000759315	-0.00207	-0.00115	0.00371	0.00148	0.00156	-0.00164	-0.00219
501.687	0	0.00202	0.0014	0.000838938	-0.00147	4.3175e-05	0.000373039	-0.000900562	-0.00192	-0.000412499	0.00164	0.00171	0.00179	0.00186	0.00194	0.00202	0.00209	0.0021	-0.000185381	-0.000252188	0.00147	0.00055959	-0.000542025	0.00308	0.00179	-0.00122	0.000918535	0.00087353	-0.000148251	-0.000978472	-0.00168	0.00117	0.00203	0.00108	-0.00131	0.00151	0.0015	-0.00149	-0.00352	0.0014	0.000197685	-0.000867841	-0.00216	-0.00104	0.0038	0.00148	0.00152	-0.00202	-0.00297
502.339	0	0.002	0.00138	0.000825509	-0.00149	4.70858e-05	0.000366751	-0.000835926	-0.00193	-0.000420397	0.00164	0.00172	0.00179	0.00187	0.00195	0.00202	0.0021	0.00199	-0.000222415	-0.000110653	0.00138	0.000504226	-0.000353252	0.00296	0.00157	-0.00109	0.000872241	0.0007919	-0.000143175	-0.000989618	-0.00154	0.00116	0.00206	0.000852101	-0.00115	0.00154	0.00124	-0.00156	-0.00322	0.00135	7.74448e-05	-0.000845645	-0.00212	-0.000729375	0.00354	0.00145	0.00126	-0.00235	-0.00367
502.992	0	0.00185	0.00125	0.000776282	-0.00143	0.000111295	0.000390694	-0.000818486	-0.00183	-0.000333949	0.00158	0.00165	0.00172	0.00179	0.00186	0.00193	0.002	0.00178	-0.000202107	-7.31664e-05	0.00131	0.000439387	-0.000189757	0.00273	0.00138	-0.000918515	0.000843135	0.000715825	-0.000210158	-0.000885218	-0.00135	0.00124	0.00191	0.000662769	-0.000919574	0.00141	0.00108	-0.00157	-0.00282	0.00123	0.000131141	-0.000892138	-0.0019	-0.000558248	0.00327	0.00137	0.00103	-0.00253	-0.00424
503.645	0	0.00171	0.00124	0.000716518	-0.00138	0.000124713	0.000367679	-0.000797027	-0.00172	-0.00033688	0.00145	0.00152	0.00158	0.00165	0.00172	0.00178	0.00185	0.00154	-0.000198037	3.60264e-05	0.00111	0.000304989	-5.20064e-05	0.00246	0.00113	-0.000733001	0.000673748	0.000596923	-0.000145044	-0.000814871	-0.00112	0.00114	0.00167	0.000531901	-0.00074798	0.00123	0.00082613	-0.00153	-0.00233	0.00105	1.42491e-05	-0.000854621	-0.00178	-0.000260775	0.00299	0.00133	0.00070831	-0.00275	-0.00472
504.297	0	0.00151	0.00104	0.000597073	-0.00124	9.54401e-05	0.000334744	-0.00066779	-0.00146	-0.000269106	0.00131	0.00137	0.00143	0.00149	0.00155	0.0016	0.00166	0.00132	-0.000114669	9.83098e-05	0.000970315	0.000264926	0.000109016	0.00216	0.000952833	-0.000565452	0.000620407	0.000468973	-0.000149453	-0.00074123	-0.000884145	0.00101	0.00145	0.000325399	-0.00054926	0.00114	0.000652858	-0.00146	-0.00193	0.000811494	1.54356e-05	-0.000787783	-0.00147	-2.73278e-05	0.00258	0.00112	0.000276269	-0.00285	-0.00493
504.95	0	0.00131	0.000848383	0.000504653	-0.0011	5.99371e-05	0.000291301	-0.00058304	-0.00127	-0.000159825	0.00116	0.00121	0.00125	0.0013	0.00135	0.00139	0.00144	0.00104	-0.000193212	0.000116103	0.000822773	0.000107312	0.000198117	0.00177	0.000605713	-0.000422808	0.000507477	0.000384225	-0.000130642	-0.000586215	-0.0006135	0.000942739	0.00125	0.000196553	-0.00037422	0.000978852	0.000496143	-0.00121	-0.00146	0.000639234	-7.43857e-05	-0.000739767	-0.00121	7.88692e-05	0.00203	0.000907361	5.38452e-06	-0.00277	-0.0049
505.603	0	0.00104	0.000708872	0.000423112	-0.00086013	0.000142633	0.000218478	-0.00048212	-0.00103	-0.000183739	0.000927562	0.000968781	0.00101	0.00105	0.00109	0.00113	0.00117	0.000803006	-9.12687e-05	0.00020851	0.000676722	6.50747e-05	0.000269931	0.00138	0.000464645	-0.000238379	0.000499112	0.000371226	-0.000120417	-0.000527772	-0.000410623	0.000832325	0.00102	0.000129379	-0.000206699	0.000793244	0.000328993	-0.00106	-0.00107	0.000513021	-4.93253e-05	-0.000628179	-0.00095027	0.000219111	0.00164	0.000736041	-0.00014637	-0.00264	-0.00477
506.255	0	0.000807123	0.000544591	0.000289062	-0.00073468	8.14721e-05	0.000182867	-0.000314595	-0.000790439	-9.90837e-05	0.000717806	0.000746258	0.00077471	0.000803162	0.000831614	0.000860066	0.000888518	0.000591217	2.1944e-06	0.000210462	0.000485238	2.39042e-05	0.000247618	0.00108	0.00034194	-0.000153318	0.000341879	0.00025247	-4.27182e-05	-0.000354078	-0.000278268	0.000633754	0.000711089	3.86263e-05	-0.000162205	0.000613373	0.00023563	-0.000880085	-0.000689139	0.000388158	-8.1397e-05	-0.000487294	-0.000692218	0.000245002	0.0012	0.000543949	-0.000318306	-0.00242	-0.00452
506.908	0	0.000632145	0.000430352	0.000256507	-0.000533073	7.44237e-05	0.000166346	-0.00031698	-0.000621186	-6.72939e-05	0.000549865	0.00057149	0.000593115	0.00061474	0.000636365	0.00065799	0.000679615	0.000399011	-4.88715e-05	0.000165807	0.00038885	3.56157e-05	0.000221248	0.000738447	0.000165165	-0.000103491	0.000248257	0.000173884	-4.77333e-06	-0.00025723	-0.000138051	0.000510717	0.00053989	-3.30821e-05	-0.000124243	0.000456036	0.000153801	-0.000665436	-0.000476009	0.000254892	-7.9166e-05	-0.000385302	-0.000519774	0.000220545	0.000895968	0.00040876	-0.000383341	-0.00213	-0.00415
507.561	0	0.000457536	0.000293872	0.000149417	-0.000374765	6.70377e-05	6.77263e-05	-0.000197505	-0.000436226	-3.41969e-05	0.000401068	0.000415741	0.000430414	0.000445087	0.00045976	0.000474433	0.000489105	0.000285203	3.54882e-05	0.000176591	0.000234742	3.08747e-05	0.000270165	0.000588382	0.00015257	-4.75415e-05	0.000177674	0.000104822	-2.31967e-05	-0.000159349	-3.55761e-05	0.000413478	0.000433727	3.45881e-05	-1.02679e-05	0.000345468	0.00011354	-0.00045151	-0.000251866	0.000194405	-4.11298e-05	-0.000284432	-0.00035065	0.000226234	0.000611658	0.000315407	-0.000327317	-0.00179	-0.0037
508.214	0	0.000322289	0.000185911	7.18588e-05	-0.000313801	-1.20847e-05	8.38831e-05	-0.000133955	-0.000254532	4.16826e-05	0.000292713	0.000300309	0.000307905	0.0003155	0.000323096	0.000330691	0.000338287	0.000183908	1.41637e-05	7.96174e-05	0.000140218	3.90268e-05	0.000180905	0.000344633	8.14499e-05	1.43241e-05	0.000128592	8.08312e-05	-2.87108e-05	-0.000206829	-6.18325e-05	0.000286815	0.00025916	-2.04388e-05	-6.81687e-06	0.000216553	6.77475e-05	-0.00029609	-0.000158008	0.000111316	-3.15941e-05	-0.000210926	-0.000271543	0.000150722	0.000407944	0.000205801	-0.000388583	-0.00155	-0.00331
508.867	0	0.000195098	0.000142807	9.97644e-05	-0.000159501	5.44901e-05	4.08357e-05	-0.00011748	-0.000212289	-3.4134e-05	0.000203445	0.000212555	0.000221665	0.000230775	0.000239886	0.000248996	0.000258106	0.000131017	1.23531e-05	0.000105279	0.00011624	4.39318e-06	0.000134279	0.000221968	1.68535e-05	-1.45256e-05	0.000107992	8.41386e-05	1.91121e-05	-7.71804e-05	8.08264e-06	0.000221894	0.000177592	-3.59974e-05	4.97103e-05	0.000185155	3.95517e-05	-0.000195222	-8.46223e-05	7.52623e-05	-1.38431e-05	-9.81943e-05	-0.000128008	0.00015341	0.000251798	0.00015317	-0.000282049	-0.00121	-0.00283
509.52	0	8.83947e-05	8.13009e-05	4.24513e-05	-0.00012557	5.77273e-05	-4.91506e-06	-8.53281e-05	-0.000111646	4.33367e-05	0.000140222	0.000142453	0.000144685	0.000146916	0.000149147	0.000151378	0.00015361	7.9966e-05	4.96829e-05	0.000126925	8.2289e-05	-1.9169e-06	8.83382e-05	0.000158123	5.65378e-05	5.14949e-05	7.83176e-05	5.72442e-05	3.25758e-05	-6.37466e-05	3.71754e-05	0.000163231	0.000139255	1.25035e-05	5.45876e-05	0.000164351	6.44957e-05	-0.000146231	-5.59474e-05	4.51227e-05	1.53406e-05	-8.85341e-05	-7.87544e-05	0.000127082	0.000154628	0.00011097	-0.000229478	-0.000981703	-0.00249
510.174	0	3.44591e-05	2.1275e-05	2.94392e-05	-0.000104576	3.9422e-05	6.38166e-05	-5.89402e-06	-7.03031e-05	1.27411e-05	7.04999e-05	7.17897e-05	7.30795e-05	7.43693e-05	7.56591e-05	7.69489e-05	7.82387e-05	4.77604e-05	7.88215e-05	7.36309e-05	3.86663e-05	3.39257e-05	0.000124817	0.000106951	1.49588e-05	5.96046e-05	8.64515e-05	8.04528e-05	4.48388e-05	-2.02955e-06	3.62335e-05	8.35547e-05	8.66784e-05	-2.79277e-05	5.60479e-05	0.000128984	5.24967e-05	-4.73799e-05	-9.23985e-07	6.85784e-05	1.4e-05	-7.26065e-05	-7.13027e-05	5.7207e-05	0.000108915	9.78905e-05	-0.000193783	-0.000812758	-0.00215
510.827	0	1.52473e-05	1.38608e-05	7.25943e-06	-5.71695e-05	2.49499e-05	5.9253e-05	3.04628e-05	-6.73648e-05	2.71694e-05	2.46902e-05	2.22981e-05	1.99059e-05	1.75138e-05	1.51216e-05	1.27295e-05	1.03374e-05	5.87639e-05	-2.70776e-05	3.03551e-05	2.28311e-05	3.8484e-06	1.76809e-05	9.98498e-05	7.10274e-05	4.2999e-05	4.92981e-05	4.98303e-05	-3.61633e-05	-1.20684e-05	1.22655e-05	7.64362e-05	3.4632e-05	1.89123e-05	4.79888e-05	0.000112911	4.89047e-05	-9.64709e-06	3.56964e-05	3.27917e-05	2.04611e-05	-5.79271e-07	-6.09927e-05	6.71136e-05	0.000100895	3.28519e-05	-0.000193443	-0.000735626	-0.00194
511.48	0	-1.79568e-05	-1.34094e-05	6.74566e-05	1.67002e-05	2.20189e-05	-2.02298e-05	-3.50087e-05	-1.2785e-05	4.85636e-06	1.20951e-05	1.22932e-05	1.24914e-05	1.26896e-05	1.28878e-05	1.3086e-05	1.32842e-05	1.65222e-05	9.3347e-06	1.83884e-05	2.32534e-05	-8.0236e-06	2.95874e-05	-1.58116e-05	-1.51009e-05	4.52969e-05	6.06006e-05	6.6322e-05	5.68871e-05	2.37341e-05	1.74453e-05	2.80967e-05	4.63939e-05	7.37605e-06	7.10408e-06	8.38568e-05	2.13464e-05	-5.70778e-05	-1.27603e-06	-5.70341e-06	-3.04746e-05	-5.54482e-05	-5.49483e-05	4.61926e-05	4.74224e-05	4.83988e-05	-0.000194154	-0.000623923	-0.00173
512.134	0	-3.93072e-05	-1.76288e-05	-2.07224e-05	-2.84872e-05	-2.73782e-05	1.22308e-06	7.66999e-06	4.54671e-05	4.47294e-05	3.02309e-05	2.96998e-05	2.91687e-05	2.86375e-05	2.81064e-05	2.75753e-05	2.70442e-05	6.89016e-06	-3.69026e-07	1.96839e-05	1.6444e-05	-1.41509e-05	-3.10961e-05	1.3933e-05	1.9379e-05	5.98042e-05	3.05861e-05	5.19757e-05	3.96598e-05	-2.45813e-05	-3.15961e-05	-5.59237e-08	-1.5703e-05	8.15218e-06	-2.39463e-05	1.98104e-05	3.20336e-05	-3.07859e-05	-1.86347e-05	4.04652e-05	-5.73639e-06	-2.72214e-05	-6.57503e-06	-2.25313e-05	3.77693e-05	5.20241e-05	-0.000167504	-0.000568188	-0.00158
512.787	0	-2.23072e-05	-2.93363e-05	-6.21591e-06	1.11413e-05	5.69021e-05	2.81987e-05	-1.77319e-06	1.71455e-05	-4.14081e-06	7.04913e-06	8.15674e-06	9.26435e-06	1.0372e-05	1.14796e-05	1.25872e-05	1.36948e-05	2.68389e-05	1.38763e-05	2.67472e-05	1.30702e-05	-6.82138e-05	-3.68488e-05	2.1283e-06	-4.1339e-06	1.71569e-05	2.45165e-05	2.33517e-06	1.83865e-06	4.08394e-05	2.98503e-05	7.4995e-05	6.73791e-05	3.18587e-05	3.26947e-05	7.88839e-05	6.5211e-05	2.08012e-05	8.62512e-06	3.07798e-05	-6.19072e-06	1.59978e-05	-1.25866e-05	-4.01428e-06	-8.28812e-06	8.3881e-05	-0.00017962	-0.000512006	-0.00147
513.441	0	-2.94171e-05	4.13701e-05	4.89161e-05	2.47361e-05	2.70865e-05	-8.08155e-06	-1.32734e-05	-2.35055e-05	-7.31625e-06	3.17151e-05	3.34344e-05	3.51536e-05	3.68729e-05	3.85921e-05	4.03113e-05	4.20306e-05	-1.0501e-05	4.32852e-05	6.2409e-07	-6.01898e-06	1.74931e-05	3.36564e-05	1.71207e-05	2.90426e-05	-4.08767e-06	4.14833e-05	8.72855e-06	-4.8854e-06	2.3119e-05	-1.93731e-06	-1.24796e-06	-6.78989e-06	6.19538e-05	4.93701e-05	0.000120138	8.93408e-06	-4.12584e-05	4.47048e-05	9.42658e-06	-3.50541e-05	-2.59589e-05	-2.54248e-06	4.37116e-05	3.76089e-05	-1.10801e-05	-0.000128223	-0.000512946	-0.00138
514.094	0	-2.22725e-05	1.54268e-05	3.97777e-05	-6.68502e-06	3.46466e-05	-2.38401e-05	2.03865e-05	-3.12086e-05	-3.89854e-06	2.22519e-05	2.2759e-05	2.32661e-05	2.37732e-05	2.42803e-05	2.47874e-05	2.52945e-05	-2.25698e-05	3.11869e-05	7.99518e-05	-1.90272e-05	2.56775e-05	-5.25753e-05	4.81504e-06	1.4661e-05	6.92966e-05	6.48218e-05	9.18502e-05	3.66695e-05	4.75321e-05	4.48702e-06	5.80509e-05	3.31885e-05	0.000110248	7.79791e-05	7.14539e-05	5.01909e-05	5.27361e-05	-1.6876e-05	4.36799e-05	3.85062e-06	3.9533e-05	2.95335e-05	4.67042e-05	7.89995e-05	7.19866e-05	-0.000174954	-0.000502632	-0.00135
514.748	0	-1.07528e-05	1.8524e-05	1.99072e-05	-9.63776e-06	3.79699e-05	-2.30134e-06	-2.24007e-05	-2.80309e-05	-1.01375e-05	4.00823e-05	4.2404e-05	4.47256e-05	4.70472e-05	4.93688e-05	5.16904e-05	5.4012e-05	3.70834e-05	6.45005e-05	-4.99357e-06	-4.83518e-05	-1.6774e-05	-2.39213e-05	-3.17457e-05	-4.12828e-05	8.60648e-05	5.01714e-05	-1.42746e-05	-1.44735e-05	2.57755e-05	7.55225e-05	3.04194e-05	8.32362e-05	4.7081e-06	3.05629e-05	9.63709e-06	5.23223e-05	3.76052e-05	1.32333e-05	2.15517e-05	5.68435e-05	-3.69209e-05	2.30197e-05	-3.26966e-05	1.26366e-05	4.10955e-05	-0.000152832	-0.000501014	-0.00126
515.402	0	-2.45793e-05	9.79756e-07	2.65604e-05	-2.67929e-05	4.89312e-05	3.51345e-05	-2.35595e-05	-3.27053e-05	8.28083e-06	3.3979e-05	3.46746e-05	3.53702e-05	3.60658e-05	3.67615e-05	3.74571e-05	3.81527e-05	5.5904e-05	5.57916e-05	-1.11039e-05	2.99788e-06	2.92813e-05	-2.85874e-05	-8.57238e-06	2.3689e-07	3.92062e-05	-2.40353e-06	-1.29083e-05	2.54682e-05	-3.89476e-05	1.45656e-05	2.03415e-06	9.2103e-06	0.000123479	1.36177e-05	6.86616e-05	3.19504e-05	4.39456e-05	9.27656e-06	-3.59749e-05	-1.8553e-05	5.59732e-05	1.73563e-05	2.58271e-05	-2.06188e-05	6.04106e-05	-0.000133351	-0.000545628	-0.00133
516.055	0	1.09391e-05	-1.29744e-05	-1.24247e-05	-3.09252e-05	5.24769e-06	-1.60004e-06	-5.16744e-06	4.79793e-05	2.31943e-05	2.98654e-05	3.08974e-05	3.19295e-05	3.29616e-05	3.39936e-05	3.50257e-05	3.60741e-05	3.95526e-05	0.000119684	1.90513e-05	-2.36432e-05	2.4162e-06	6.58208e-06	5.38888e-05	-4.57516e-05	0.000110226	3.085e-05	8.1497e-05	2.48072e-05	1.66367e-05	-1.70506e-05	4.26311e-05	4.7163e-05	3.07072e-05	5.18168e-05	5.93339e-06	5.95608e-05	-3.90111e-05	2.89925e-05	5.26282e-05	-3.28275e-05	-2.17675e-05	-5.80861e-05	4.64025e-05	2.91251e-05	1.74394e-05	-0.000154276	-0.000494955	-0.00119
516.709	0	-2.26121e-05	-9.17969e-06	1.53425e-05	2.02175e-05	4.9246e-05	-4.98452e-05	8.4551e-06	5.53275e-06	-1.23562e-05	-3.24673e-05	-3.33908e-05	-3.43142e-05	-3.52376e-05	-3.61611e-05	-3.70845e-05	-3.27942e-05	4.32421e-05	2.294e-05	1.60652e-05	-1.86025e-05	1.9427e-05	-2.74646e-05	5.06355e-05	-2.1076e-05	9.57255e-06	3.18867e-05	5.23197e-05	2.27899e-05	-1.93896e-05	1.81643e-05	1.7776e-05	-1.01925e-05	1.08363e-05	2.45003e-05	1.85041e-05	3.77597e-05	-2.30745e-05	-1.90354e-05	-2.61704e-05	-5.20353e-05	-4.30605e-06	-5.94032e-06	1.52926e-06	2.34974e-05	1.87314e-06	-0.000154188	-0.000537148	-0.00124
517.363	0	-1.25106e-05	-6.7516e-05	-2.64441e-05	2.83979e-05	-7.89332e-06	-1.7375e-05	1.55944e-05	1.12811e-05	4.94234e-05	7.61699e-05	7.68842e-05	7.75985e-05	7.83128e-05	7.90271e-05	7.97414e-05	7.38447e-05	1.90175e-05	2.17151e-05	-1.96292e-05	-3.42014e-05	5.89474e-05	3.81994e-05	4.76522e-06	3.00466e-05	0.000136121	1.15767e-05	5.88966e-05	4.75788e-05	2.50107e-05	5.89475e-05	8.11533e-05	9.58248e-05	3.6171e-05	1.36909e-05	7.95992e-05	7.98959e-05	4.51268e-06	7.39854e-05	1.97468e-05	-4.87423e-05	-1.0626e-05	-9.0275e-06	3.91062e-05	2.83836e-05	6.40985e-05	-0.000108244	-0.000550043	-0.00117
518.017	0	1.50812e-05	-1.64228e-05	6.7466e-06	-3.17883e-05	3.05346e-05	-2.34999e-05	-2.60992e-05	-1.81673e-05	1.80282e-05	3.65738e-05	3.69718e-05	3.73698e-05	3.77678e-05	3.81658e-05	3.85638e-05	3.52061e-05	2.08744e-05	4.91849e-05	-2.55155e-05	-3.16445e-05	2.36748e-05	-1.99322e-05	4.55916e-05	2.80654e-05	8.42692e-05	3.8632e-05	0.000101355	3.43398e-05	-5.85692e-06	1.37633e-05	3.30996e-05	-2.62321e-07	1.62541e-05	2.84072e-05	3.79666e-05	3.66484e-05	1.26438e-05	3.84038e-06	5.19839e-05	-4.67763e-05	2.32001e-05	-3.71495e-05	-4.0464e-05	1.37972e-05	2.8718e-06	-0.00015993	-0.000537841	-0.00115
518.671	0	-7.31855e-05	-6.12814e-06	1.48154e-05	-2.80107e-06	5.38592e-05	-4.89559e-05	-6.90319e-06	-3.47578e-05	6.18421e-05	4.60235e-05	4.34279e-05	4.08323e-05	3.82367e-05	3.56411e-05	3.30455e-05	2.61063e-05	2.35903e-05	8.00785e-05	-2.78083e-06	2.00905e-05	-1.48069e-05	-3.23407e-05	3.03495e-06	1.58588e-05	1.7036e-06	3.15369e-05	3.57486e-06	1.01847e-05	1.31506e-05	1.32145e-05	1.67948e-05	2.96565e-05	1.57225e-05	-2.2032e-05	1.65027e-05	3.75678e-06	-2.77882e-05	-1.94851e-05	-2.90092e-05	-3.52202e-05	1.17837e-05	-3.93123e-05	1.27378e-05	-1.2695e-06	-4.92998e-05	-0.000159728	-0.000524137	-0.00116
519.325	0	3.60848e-05	3.18373e-05	-5.4138e-06	-2.01265e-05	2.69645e-05	-1.04013e-06	-5.69505e-05	-6.04813e-05	6.83288e-06	-1.4059e-05	-1.6151e-05	-1.82431e-05	-2.03352e-05	-2.24273e-05	-2.45194e-05	-2.08573e-05	7.61227e-07	1.02293e-05	-1.22913e-06	8.4322e-06	-4.49103e-06	-3.32903e-05	3.21995e-05	3.72135e-05	6.17687e-05	9.7678e-06	4.14758e-05	5.05031e-06	1.19234e-05	6.01591e-05	2.6978e-05	2.04096e-05	4.91345e-05	1.37336e-05	5.3679e-06	2.61721e-05	1.08392e-05	-4.46402e-05	5.76411e-05	2.65632e-05	2.93993e-05	3.45214e-05	-4.98863e-06	7.56555e-05	-3.81336e-05	-0.000105432	-0.000480846	-0.00107
519.979	0	1.17776e-05	-1.25025e-05	1.04638e-05	-1.1232e-05	-2.02553e-05	-3.87831e-05	3.74547e-05	2.163e-05	1.61058e-05	-4.35595e-05	-4.67538e-05	-4.99481e-05	-5.31424e-05	-5.63367e-05	-5.9531e-05	-3.79886e-05	2.01531e-05	2.02408e-05	4.48206e-05	1.14565e-05	-1.34737e-06	-2.89268e-05	-1.29699e-05	8.00774e-06	2.34175e-05	-3.35452e-05	6.74498e-07	-1.688e-05	3.714e-05	2.08913e-05	-1.27704e-05	2.42369e-05	2.83021e-05	4.17095e-05	4.88933e-05	-1.25822e-05	-5.5462e-05	-6.49339e-06	7.68257e-05	-1.77236e-05	6.65357e-06	2.19939e-06	-2.65855e-05	-3.15451e-05	2.3668e-05	-0.000164748	-0.000543666	-0.0011
520.633	0	-4.19389e-05	1.02642e-05	5.36917e-05	2.67847e-05	-1.55224e-05	-1.56479e-05	9.93562e-06	-3.5855e-05	2.13955e-05	3.68764e-05	3.657e-05	3.62636e-05	3.59573e-05	3.56509e-05	3.53445e-05	3.31767e-05	2.25673e-05	2.01995e-05	3.57446e-05	-1.93273e-06	-4.04697e-05	-3.20386e-05	9.36569e-06	5.43102e-05	6.5069e-05	5.91847e-05	1.18015e-05	1.47523e-05	-1.69558e-05	-1.95572e-05	1.85275e-05	5.55343e-05	2.67665e-05	3.7499e-05	4.11767e-05	2.3567e-06	-1.13784e-05	-2.15916e-05	2.22143e-05	-4.19255e-05	5.45891e-06	-5.63557e-06	1.56672e-05	1.33121e-05	-1.60608e-06	-0.000193606	-0.000532047	-0.00101
521.288	0	4.99484e-06	1.56478e-05	1.76342e-05	-1.39496e-05	-5.96471e-06	1.91165e-05	6.68329e-06	-3.42344e-05	-2.28065e-05	3.41401e-05	3.67537e-05	3.93673e-05	4.19809e-05	4.45945e-05	4.72081e-05	5.06833e-05	3.6589e-05	7.91334e-06	1.9108e-05	3.4621e-05	1.33465e-06	-3.86122e-05	2.09895e-05	4.62762e-05	2.39869e-05	-6.71707e-05	-1.66819e-05	1.61577e-05	2.11158e-05	5.13253e-06	4.02826e-05	5.25974e-05	1.5831e-05	2.11469e-05	4.70229e-05	7.02964e-06	7.72424e-06	1.1183e-05	-2.04447e-05	-2.2053e-05	1.69465e-05	7.02552e-06	-6.0684e-06	-1.3723e-05	-1.283e-05	-0.00016755	-0.000513546	-0.000968869
521.942	0	-4.11303e-05	5.07601e-06	8.80645e-06	-1.14173e-05	1.44908e-05	1.11603e-05	-1.56366e-05	-1.30735e-05	2.65627e-05	5.03289e-05	5.10039e-05	5.1679e-05	5.2354e-05	5.3029e-05	5.3704e-05	6.94787e-05	5.97082e-05	4.34542e-06	8.7195e-06	2.66228e-05	3.1265e-05	2.6192e-05	1.79744e-05	6.99766e-05	7.11706e-05	3.21176e-05	4.20339e-05	-6.07468e-06	-8.81091e-06	-9.8446e-06	2.40599e-06	9.74843e-06	2.84305e-05	1.17231e-05	4.80178e-05	8.03931e-05	3.47558e-05	2.51438e-05	1.2878e-05	-2.01327e-05	-9.53165e-06	-9.53648e-06	4.7412e-05	3.19451e-05	-1.41913e-05	-0.000153786	-0.000470001	-0.000947742
522.596	0	-1.25766e-05	-8.58872e-06	1.56348e-05	-1.41149e-05	-1.46538e-06	-1.25981e-05	1.10275e-05	-3.67725e-05	3.65604e-05	0.000110292	0.00011277	0.000115248	0.000117727	0.000120205	0.000122683	8.85161e-05	4.18432e-05	2.87044e-05	2.82408e-05	8.23988e-06	-2.31873e-05	1.88004e-06	4.47336e-05	6.76894e-05	4.34053e-05	9.265e-05	0.000100878	5.96626e-05	2.72836e-05	6.31349e-06	2.1434e-05	1.06761e-07	-1.31056e-05	-7.25084e-06	3.57334e-05	2.9443e-05	1.3951e-05	1.22528e-05	4.55736e-05	4.5837e-05	3.51283e-05	1.27059e-05	1.38499e-05	2.72941e-05	-1.57925e-06	-0.000201869	-0.000528321	-0.000935303
523.251	0	-5.36946e-05	-3.25937e-06	3.85797e-05	2.22327e-05	3.04918e-05	-4.88952e-05	-6.40051e-06	-3.57039e-05	2.50274e-05	1.86906e-05	1.72838e-05	1.5877e-05	1.44703e-05	1.30635e-05	1.16568e-05	3.14216e-05	3.09834e-05	2.34768e-05	5.63185e-05	4.98418e-05	2.75465e-05	1.48245e-05	2.83443e-05	4.08082e-05	2.30211e-05	2.36546e-05	1.67342e-05	1.1237e-05	2.18201e-05	5.4987e-05	6.21162e-05	4.51709e-05	4.52556e-05	5.70748e-05	5.47313e-05	2.55437e-05	1.78469e-05	2.46616e-05	2.89267e-05	3.22981e-05	1.76808e-05	1.89816e-05	4.2255e-05	3.97337e-05	-1.79795e-05	-0.000203893	-0.000508802	-0.000902011
523.906	0	-5.68139e-05	-5.44843e-05	3.96948e-05	-3.42763e-05	3.85265e-05	-5.14603e-06	-3.80977e-05	2.24507e-05	5.06441e-05	4.02408e-05	3.95613e-05	3.88818e-05	3.82023e-05	3.75229e-05	3.68434e-05	4.46886e-05	6.03716e-06	-1.53978e-05	-2.42522e-06	4.82827e-06	3.5606e-05	2.90375e-05	1.30355e-06	2.31302e-05	4.79774e-05	3.16672e-05	1.20773e-05	2.00621e-05	-5.99055e-06	-4.3794e-05	1.36454e-05	6.19161e-05	1.6896e-05	2.2043e-05	2.5177e-05	-7.11063e-06	1.74389e-05	3.41597e-06	-2.50779e-05	-1.08898e-05	1.5705e-05	1.17242e-05	8.47243e-06	1.41588e-05	-2.17923e-05	-0.000172451	-0.000496023	-0.000901114
524.56	0	7.68071e-07	-4.06482e-05	8.15576e-05	-4.36413e-06	3.43486e-05	7.5743e-06	-2.37999e-05	-4.584e-05	2.93045e-05	-1.02969e-05	-1.34564e-05	-1.66159e-05	-1.97754e-05	-2.29349e-05	-2.60944e-05	-1.10304e-05	2.5167e-05	1.30633e-05	-1.91451e-05	-3.09909e-05	-3.66591e-05	-1.01703e-05	2.55275e-05	5.10654e-05	3.11216e-05	3.48928e-05	7.19941e-05	3.98894e-05	1.32891e-05	5.45015e-06	-9.12649e-06	-1.62025e-05	6.55815e-06	2.14506e-05	1.60207e-05	-2.15886e-06	-1.41706e-06	-3.22631e-05	-7.26612e-05	-8.97624e-06	2.21203e-05	3.35558e-05	1.59165e-05	6.73276e-06	-4.84691e-06	-0.000171576	-0.000418687	-0.000815692
525.215	0	-1.56991e-05	-7.75407e-06	-6.15345e-05	-3.39013e-05	3.27678e-05	-6.61662e-06	2.36099e-05	-3.4442e-05	6.10153e-05	4.96709e-05	4.74783e-05	4.52857e-05	4.30931e-05	4.09006e-05	3.8708e-05	1.46385e-05	-1.37751e-05	-6.01272e-06	6.36559e-06	2.42108e-05	-1.64518e-05	2.2322e-06	4.74746e-05	4.059e-05	2.25746e-05	1.40986e-05	2.49337e-05	2.8144e-05	4.36255e-05	8.26774e-06	1.52058e-05	4.80397e-05	1.82805e-05	3.77375e-05	3.71831e-05	5.67773e-06	5.00426e-06	1.79251e-05	-1.76801e-05	-3.09141e-05	-1.64201e-05	2.48456e-05	1.00726e-05	2.06464e-05	6.79689e-07	-0.000160659	-0.000440525	-0.000872549
525.87	0	-9.00009e-06	-3.10095e-05	1.87429e-05	2.01423e-05	2.45786e-06	4.85104e-06	3.72489e-05	-2.69296e-06	3.40265e-06	6.65597e-05	6.95074e-05	7.2455e-05	7.54027e-05	7.83504e-05	8.12981e-05	4.49171e-05	3.27096e-05	4.49002e-05	3.92839e-05	1.44778e-05	4.59436e-05	-4.0431e-06	-2.00432e-06	6.33989e-05	5.40636e-05	3.40387e-05	-1.21096e-05	4.06455e-05	9.35296e-06	-2.62385e-05	-2.53421e-05	-3.26049e-05	-6.47353e-06	4.49506e-05	8.03989e-05	9.98181e-05	4.59834e-05	1.8215e-05	-5.69151e-05	-2.95873e-05	1.14182e-05	-1.45955e-05	-1.45482e-05	3.47514e-05	4.51131e-06	-0.000213883	-0.000467519	-0.000842577
526.524	0	7.46812e-06	2.70248e-05	1.54148e-05	-2.59795e-05	3.44633e-06	1.57924e-05	3.49415e-06	-4.10733e-06	1.82761e-06	-1.5499e-05	-1.64762e-05	-1.74534e-05	-1.84306e-05	-1.94078e-05	-2.0385e-05	-2.84291e-05	2.68882e-05	3.71507e-05	3.48406e-05	-2.45883e-05	7.81242e-06	-1.56829e-05	-3.22428e-05	9.03484e-05	9.40967e-05	5.25145e-05	1.56116e-05	3.34011e-05	8.4005e-06	7.32713e-06	4.25717e-05	9.97369e-06	-3.61457e-05	4.89926e-05	8.67267e-05	7.54203e-05	1.82168e-05	9.84304e-06	-3.17072e-05	-1.67855e-05	-5.97186e-06	-3.22916e-05	-3.29205e-05	3.37073e-06	-4.31465e-06	-0.000154685	-0.000456584	-0.000847529
527.179	0	-3.42574e-05	2.19404e-05	-3.26639e-05	6.29697e-06	3.60733e-05	9.53469e-06	9.51779e-06	-2.00023e-05	4.38422e-05	-2.72559e-05	-3.18423e-05	-3.64287e-05	-4.10151e-05	-4.56015e-05	-5.01878e-05	-2.98414e-05	1.21163e-05	3.43614e-05	-6.66397e-05	-3.0105e-05	-7.52597e-06	-2.04166e-05	1.63103e-05	5.46293e-05	4.17335e-05	5.38381e-05	1.20558e-05	-2.17799e-05	1.60941e-05	3.49759e-05	9.84846e-06	4.53013e-05	-3.28958e-05	-1.96633e-05	-1.60941e-06	2.4117e-05	8.84942e-06	1.65531e-05	3.55699e-05	-2.1028e-05	1.99378e-05	3.95974e-05	5.50797e-05	4.88358e-05	-1.17918e-05	-0.000193639	-0.000481326	-0.000825346
527.834	0	-3.44991e-05	-5.4602e-05	-2.07951e-07	1.81308e-05	5.14106e-05	-5.92923e-06	4.00844e-05	-1.64803e-05	8.84662e-06	8.39862e-05	8.71879e-05	9.03895e-05	9.35911e-05	9.67927e-05	9.99943e-05	4.594e-05	7.13138e-05	1.91393e-05	-7.56867e-07	1.32434e-05	2.96226e-05	1.27404e-05	2.44539e-05	6.29544e-05	6.54963e-05	4.48903e-05	-3.02795e-06	-5.27813e-06	-9.32413e-06	-1.77835e-05	-1.91401e-05	9.94943e-06	1.65213e-05	4.36877e-05	6.65249e-05	5.04826e-05	4.80706e-05	8.48165e-06	-6.89426e-06	-1.35668e-05	3.44872e-05	2.68958e-05	4.27297e-05	3.54078e-05	3.20152e-05	-0.000211773	-0.000459404	-0.000799909
528.489	0	-8.75968e-05	-5.81462e-06	1.46479e-05	1.47507e-05	3.58427e-05	-7.27671e-06	1.14009e-05	-4.56714e-05	5.65643e-05	8.31711e-06	4.29774e-06	2.78364e-07	-3.74101e-06	-7.76038e-06	-1.17798e-05	1.47999e-05	3.585e-05	4.68017e-05	-5.08447e-05	-4.77549e-05	-6.57088e-06	-1.68498e-05	2.2377e-05	4.6082e-05	-1.41572e-05	6.97521e-06	6.43856e-06	2.80654e-05	3.9229e-05	-6.67569e-06	-2.02978e-05	-1.0306e-05	-2.64029e-05	-8.66491e-06	5.17641e-05	2.69696e-05	-6.58339e-05	-1.80356e-05	-4.08984e-05	-7.38948e-05	-6.195e-05	-5.66457e-05	-1.24e-05	-1.58985e-05	-2.15438e-05	-0.000200389	-0.000482482	-0.000827766
529.144	0	-2.83209e-05	-3.53612e-05	-5.15681e-06	-1.81793e-07	7.46199e-07	3.24642e-06	6.30636e-06	8.16192e-06	4.99587e-05	-4.08349e-05	-4.59547e-05	-5.10745e-05	-5.61943e-05	-6.1314e-05	-6.64338e-05	6.65312e-07	2.65671e-05	2.31921e-06	2.44338e-05	7.50055e-06	-7.01698e-05	3.67857e-05	3.8404e-05	-1.18585e-05	3.57017e-06	3.2684e-05	-9.55993e-06	-3.02688e-05	-3.16532e-05	8.08234e-06	3.56841e-05	4.02103e-05	-5.30479e-07	4.3266e-05	2.12595e-05	-1.9583e-05	-3.07878e-05	-6.99958e-05	-4.98633e-05	-5.45217e-06	-1.55957e-05	-6.33626e-05	2.2115e-07	-3.49235e-05	-5.7671e-05	-0.000193411	-0.000462441	-0.000831739
529.799	0	-2.93985e-05	-3.2438e-05	-2.61368e-05	-1.50998e-05	4.6466e-05	-5.54043e-06	3.73504e-05	9.7017e-06	6.08343e-05	2.31384e-05	2.04359e-05	1.77333e-05	1.50308e-05	1.23282e-05	9.62566e-06	7.79032e-06	4.056e-05	6.01285e-05	2.67718e-05	-5.00349e-06	-3.6414e-05	7.08102e-06	-4.45569e-06	2.96466e-05	-2.38819e-05	-3.03293e-05	2.18017e-05	5.4651e-06	-1.31484e-05	3.31475e-05	-2.91351e-06	5.61503e-05	-5.90045e-05	-1.9956e-05	1.10075e-05	-2.38983e-05	-5.0448e-05	-3.69505e-05	-2.66083e-05	-2.28825e-05	-6.54041e-06	-7.70087e-05	1.58652e-05	5.05074e-05	-7.55123e-05	-0.000195588	-0.000452141	-0.000890297
530.454	0	-5.19324e-05	-4.2561e-05	3.9178e-05	-3.78371e-05	1.68925e-05	8.92882e-06	2.76006e-05	6.04869e-05	8.30794e-06	-2.82153e-05	-2.92949e-05	-3.03744e-05	-3.1454e-05	-3.25335e-05	-3.3613e-05	5.94629e-06	-2.67534e-05	-7.70404e-05	5.62971e-06	3.13927e-05	-3.14765e-05	-5.15256e-05	-6.17077e-06	3.16682e-05	1.19907e-05	9.51661e-06	7.76144e-06	-2.30573e-06	1.51455e-05	2.22686e-06	-3.95748e-05	1.978e-07	6.2346e-05	6.32112e-05	-1.2793e-05	1.95579e-07	7.6436e-06	-7.14683e-06	3.11018e-06	-5.882e-05	-7.31319e-05	-2.30246e-05	2.32635e-05	-1.10669e-05	-1.33022e-05	-0.000167239	-0.000450289	-0.000863132
531.11	0	-2.07928e-05	-4.24832e-05	2.96561e-05	1.02273e-05	2.99709e-05	8.51516e-06	-2.69231e-06	-2.92153e-05	1.59386e-06	6.77382e-05	7.05807e-05	7.34233e-05	7.62658e-05	7.91083e-05	8.19509e-05	9.47093e-05	6.46426e-05	1.23242e-05	-4.67716e-05	3.14694e-05	-5.07924e-06	4.42999e-05	-6.66965e-05	1.73169e-05	-6.14234e-06	4.35021e-05	-1.66436e-05	3.99599e-05	1.51633e-05	3.15654e-05	8.23689e-05	-9.25125e-06	9.52563e-05	2.86397e-05	3.85682e-05	1.64337e-05	1.63746e-05	-3.77352e-05	3.27314e-05	2.23784e-06	-2.90588e-05	-2.80266e-05	1.01627e-06	6.19706e-05	-4.94636e-05	-0.000109191	-0.000481714	-0.000840495
531.765	0	-3.14132e-05	-2.67279e-05	2.3303e-05	-1.12714e-05	-2.96813e-05	1.51505e-05	2.17715e-05	1.92206e-05	-6.31103e-07	-6.56064e-06	-6.61283e-06	-6.66501e-06	-6.7172e-06	-6.76939e-06	-6.82157e-06	9.83693e-06	1.5734e-05	-3.84706e-06	1.53624e-05	-5.86972e-05	-5.45455e-05	3.06724e-05	-4.02041e-05	9.52992e-05	5.66008e-05	2.17643e-05	1.06934e-05	1.12091e-05	-1.59483e-05	3.70973e-05	-2.04128e-05	-8.81311e-05	2.50866e-06	-2.32564e-05	6.22522e-05	-9.14237e-06	3.72649e-05	-3.91614e-05	-7.13806e-06	4.94271e-06	-2.76178e-05	-5.48577e-05	-4.76402e-05	-4.65904e-05	-5.31328e-05	-0.000115858	-0.000434818	-0.000839604
532.42	0	-4.26111e-05	2.68198e-05	-2.60144e-05	-4.04677e-05	3.55583e-05	2.62382e-05	3.27865e-05	-2.51005e-05	-1.83062e-05	-3.82548e-05	-3.95221e-05	-4.07895e-05	-4.20568e-05	-4.33241e-05	-4.14758e-05	4.19605e-05	3.57739e-05	2.18285e-05	-2.34353e-05	1.3469e-05	2.90812e-06	-2.04056e-05	4.73491e-05	2.99712e-05	1.26617e-05	5.35877e-05	9.64671e-06	-1.19958e-05	1.44983e-05	2.38627e-05	4.64436e-05	1.26161e-05	-2.8935e-06	-3.17429e-05	1.90921e-05	-3.667e-05	-2.4879e-05	4.40975e-05	-2.64084e-05	2.60664e-05	4.85106e-05	4.35538e-06	-3.37566e-05	3.26558e-05	-5.91291e-05	-0.000140393	-0.000390983	-0.000841716
533.076	0	-2.4046e-05	6.28091e-05	5.16159e-06	1.97334e-05	-6.96458e-06	-5.79341e-05	1.94288e-05	-1.53921e-05	1.5682e-06	-9.78068e-05	-0.000103134	-0.000108461	-0.000113787	-0.000119114	-0.0001134	2.05733e-05	2.217e-05	-2.18481e-05	-3.93581e-05	6.13405e-05	1.54648e-05	-4.23203e-05	-2.44533e-05	5.28603e-05	1.24882e-06	2.28609e-06	-1.15955e-05	-1.3283e-05	-8.83999e-06	-3.77273e-05	2.83887e-05	-2.76078e-06	-2.1472e-05	-4.58408e-05	2.63806e-05	2.27248e-05	-2.21355e-07	5.12272e-05	-4.02399e-05	-1.75112e-05	-2.05645e-05	2.67885e-05	7.07117e-05	1.02962e-05	-4.49526e-05	-0.00016414	-0.000410681	-0.000762736
533.731	0	-6.51543e-07	-1.24637e-05	-1.4576e-05	4.81668e-05	-2.66066e-05	-1.48842e-06	3.07676e-05	1.05008e-06	-3.40113e-06	7.13686e-07	8.69918e-07	1.02615e-06	1.18238e-06	1.33861e-06	6.44183e-06	4.58713e-05	4.31124e-05	1.10615e-05	-1.995e-05	-2.48072e-05	-3.12025e-05	1.67193e-05	-6.67245e-06	6.56636e-06	-3.242e-05	9.06121e-06	-5.91807e-06	1.64115e-05	-3.85816e-05	2.85909e-05	-2.65287e-06	1.61552e-05	4.33418e-05	6.27704e-05	-1.50863e-05	-4.69038e-05	-2.17863e-05	1.04471e-05	-1.97355e-05	-4.49179e-05	1.5234e-05	1.20426e-05	1.21044e-05	1.27625e-06	-2.10193e-05	-9.80388e-05	-0.000481085	-0.000773627
534.387	0	-2.23401e-05	6.74587e-05	3.67125e-05	2.1537e-05	6.90164e-06	2.35156e-05	-6.16241e-05	-4.92404e-05	-2.49288e-05	-6.68722e-06	-5.97448e-06	-5.26174e-06	-4.54901e-06	-3.83627e-06	-1.09999e-06	-2.18907e-06	-6.30027e-05	1.92772e-05	4.98759e-05	4.15276e-05	3.23471e-06	6.27136e-06	1.93284e-05	4.01432e-05	3.51833e-05	0.000106302	1.23042e-05	2.20769e-05	-6.05065e-05	-4.28319e-05	5.09816e-07	-4.72783e-06	6.24175e-05	9.10946e-06	-1.87812e-05	1.25061e-05	-1.99983e-05	2.12795e-05	-3.83557e-05	1.45758e-05	-1.30633e-05	3.60673e-05	2.68321e-05	-1.17643e-05	-3.93385e-05	-0.000155691	-0.000465743	-0.000802285
535.042	0	-6.96002e-05	-3.42027e-05	5.04815e-05	-1.7654e-05	1.6587e-05	-3.62909e-05	9.22273e-06	3.09097e-05	3.52191e-05	1.90857e-05	1.82557e-05	1.74256e-05	1.65956e-05	1.57655e-05	1.55221e-05	2.15371e-05	2.97382e-05	-1.29032e-05	-1.08242e-05	1.30188e-05	2.59355e-05	9.28897e-06	-1.39159e-05	1.4751e-05	5.81964e-05	6.39414e-05	6.71992e-07	-2.19175e-05	6.41927e-06	6.50814e-07	2.04267e-05	1.94635e-05	-1.88962e-05	-2.53443e-05	-3.73566e-05	-6.02619e-05	-4.95825e-05	1.2179e-05	4.63884e-05	-8.11923e-06	2.97904e-05	2.06349e-05	-1.89792e-05	3.07342e-06	-1.45286e-05	-0.000214747	-0.000480338	-0.000845093
535.698	0	2.91701e-06	2.12344e-05	-1.63481e-05	-1.56369e-05	7.09682e-05	7.39061e-06	9.7612e-06	-6.28699e-05	-2.53612e-05	-2.24201e-05	-2.29268e-05	-2.34335e-05	-2.39402e-05	-2.4447e-05	-1.85108e-05	6.08375e-06	2.20123e-05	3.69655e-05	3.17757e-05	6.09074e-05	-6.6082e-06	-2.13631e-05	2.48443e-05	6.1351e-05	5.97889e-05	5.17017e-05	1.78061e-05	5.10256e-05	-1.33142e-06	1.68491e-06	1.09025e-05	3.31039e-05	-2.10012e-06	8.5881e-06	1.54084e-05	2.93526e-05	-1.77313e-05	-1.44954e-08	2.07579e-05	1.95666e-05	-3.31944e-05	-2.05868e-05	-2.32492e-05	3.70603e-05	-3.00571e-05	-0.000151939	-0.000430502	-0.000808241
536.354	0	-7.75866e-05	2.44014e-05	-3.42241e-06	3.87769e-05	2.85171e-05	-1.12254e-05	-4.40261e-05	-8.00354e-06	2.31701e-05	2.94209e-05	2.94825e-05	2.95442e-05	2.96058e-05	2.96674e-05	3.02426e-05	1.57705e-05	-2.78541e-05	-1.71037e-05	8.24661e-06	-3.15681e-06	-4.25238e-05	3.12372e-06	2.99234e-05	6.58187e-05	5.91848e-05	3.49725e-05	1.9853e-05	2.319e-05	4.02887e-06	-3.50922e-05	-1.15226e-05	7.85326e-07	1.88259e-05	3.30929e-05	3.99362e-05	4.8341e-05	3.59642e-05	5.20444e-05	2.04332e-05	2.29232e-05	1.05971e-05	5.34212e-06	5.49788e-06	3.69758e-05	2.16655e-05	-0.000132601	-0.000435323	-0.000774118
537.009	0	-3.07569e-05	1.85122e-05	3.03869e-05	-2.02482e-05	2.29182e-05	-7.46192e-06	-6.12136e-05	-9.83445e-06	3.23906e-05	-1.56705e-05	-1.8357e-05	-2.10435e-05	-2.37301e-05	-2.64166e-05	-1.5511e-05	-9.43269e-06	-2.70975e-05	2.64405e-05	-3.38671e-05	-8.39733e-07	-3.92873e-06	2.97067e-06	-6.34228e-08	3.16746e-05	2.09574e-05	-1.34912e-05	4.34276e-06	3.87368e-05	-2.92722e-05	1.96743e-05	-6.73966e-07	4.88311e-06	2.46445e-05	-3.2541e-06	1.16705e-06	-2.24249e-05	7.49349e-06	3.19126e-05	-3.79758e-05	5.42682e-06	-4.71935e-06	-3.29415e-05	8.5518e-06	-8.24826e-06	-1.69208e-05	-0.000123998	-0.000384254	-0.000758043
537.665	0	-3.27151e-05	-2.37663e-05	1.79167e-05	3.21919e-05	3.30726e-05	-1.44402e-05	-5.2591e-06	-1.44539e-06	7.63641e-06	-5.28498e-05	-5.59282e-05	-5.90066e-05	-6.2085e-05	-6.51634e-05	-4.68373e-05	-2.06425e-05	-2.84033e-05	1.2177e-05	7.65224e-06	-3.08637e-05	-4.4082e-05	-4.94177e-06	8.91279e-06	2.17553e-05	2.22818e-05	1.76903e-05	-1.05871e-05	-2.32071e-05	1.031e-05	-1.03517e-05	4.46402e-06	6.92558e-06	2.14986e-05	2.10918e-05	-4.51323e-05	-2.97803e-06	-2.54127e-06	-2.20308e-05	-6.73534e-05	-4.44638e-05	-4.33142e-05	-2.18416e-05	-2.1096e-05	1.20869e-05	-5.45694e-05	-0.000197756	-0.000465077	-0.000770339
538.321	0	1.31146e-05	1.31556e-05	2.60269e-05	9.7844e-07	-2.93993e-05	-5.07369e-05	9.93706e-06	-1.61611e-05	3.26441e-05	2.97564e-05	2.89682e-05	2.81799e-05	2.73917e-05	2.66034e-05	2.4149e-05	2.46781e-05	2.02559e-05	2.41363e-05	6.43141e-05	3.39004e-05	-1.24151e-05	-5.86007e-07	-1.44527e-06	2.78955e-05	3.17039e-05	4.74691e-05	-1.00148e-05	-5.79408e-05	-2.68788e-05	-1.10327e-05	2.48607e-05	4.09624e-05	4.33349e-05	5.41832e-05	1.21991e-05	2.06997e-06	3.00116e-06	6.9513e-06	-3.72624e-05	-5.0127e-05	-2.94074e-05	4.86861e-05	5.37391e-05	4.23832e-05	-2.46397e-05	-0.000201335	-0.000443601	-0.000744633
538.977	0	-2.45074e-05	-2.85405e-05	-3.27502e-05	3.3946e-05	1.2308e-05	-1.07998e-05	2.40711e-05	3.79449e-05	-2.84934e-05	1.42201e-05	1.70572e-05	1.98944e-05	2.27315e-05	2.55686e-05	4.54537e-05	2.21313e-05	-2.72619e-05	2.73333e-05	8.7395e-05	7.38029e-05	1.47847e-05	1.82571e-05	3.29761e-05	3.3538e-05	2.42055e-05	9.34221e-05	5.50139e-05	2.56998e-05	3.31606e-05	6.83304e-06	-1.39096e-05	-3.10191e-05	1.07581e-05	8.86351e-06	-2.075e-05	2.01072e-05	-4.27153e-06	-2.69601e-05	-3.54744e-06	6.68232e-06	1.23183e-05	6.24619e-05	2.18899e-05	-9.95412e-06	6.68735e-06	-0.000157613	-0.000473339	-0.000776012
539.633	0	-6.19215e-05	8.33504e-06	-3.77178e-05	-2.55421e-05	1.70198e-05	-4.15511e-05	-1.07832e-05	1.32412e-05	3.90039e-05	-3.84927e-05	-4.25292e-05	-4.65656e-05	-5.06021e-05	-5.46385e-05	-5.148e-05	-2.99546e-05	7.93101e-07	2.15249e-05	1.95951e-06	-2.61025e-05	-3.6675e-05	-3.66805e-05	1.05022e-05	2.0898e-05	2.2873e-06	-2.74869e-05	-6.22551e-05	-3.71154e-05	-4.29909e-05	-4.9063e-05	-4.84377e-06	6.19475e-06	1.59769e-05	3.33716e-05	9.69795e-06	-1.90899e-05	-2.95378e-05	-5.86734e-05	-8.08756e-05	-4.69804e-05	-3.0576e-05	-5.71227e-05	-3.19333e-05	3.31018e-05	1.12492e-05	-0.000150642	-0.000477525	-0.00080662
540.289	0	3.57485e-05	5.52883e-05	-5.6806e-07	2.05989e-05	-6.54847e-06	-5.89276e-05	-2.83865e-05	1.83778e-05	5.19048e-06	5.88046e-05	6.16533e-05	6.4502e-05	6.73507e-05	7.01994e-05	6.22315e-05	4.34782e-05	-6.69033e-06	-2.49958e-05	1.47734e-05	1.65917e-05	1.77638e-05	3.06504e-05	4.67057e-05	-2.82204e-06	-4.10777e-05	-6.09341e-06	5.75247e-06	-1.32258e-05	-1.58111e-05	5.56045e-05	2.92053e-05	5.45058e-06	1.28096e-05	-1.68331e-05	-7.82898e-06	-3.08705e-05	-2.94689e-05	1.31932e-05	1.0067e-05	-3.4762e-05	-4.22613e-05	-1.55929e-05	8.45439e-06	1.96823e-05	-1.82435e-05	-0.000172049	-0.000445174	-0.000789986
540.946	0	1.48204e-05	1.65943e-05	-1.48854e-05	-1.49478e-05	-1.00509e-05	-1.29123e-05	2.69033e-05	-1.47235e-06	-6.43576e-07	5.28549e-05	5.53665e-05	5.78782e-05	6.03898e-05	6.29015e-05	4.93927e-05	-4.17156e-05	-3.09563e-05	-9.63e-07	-1.8472e-05	-1.96893e-05	-1.62681e-05	1.13373e-06	1.93503e-05	7.05286e-07	3.58051e-05	5.61658e-05	5.51452e-05	5.79789e-05	3.59063e-06	3.05642e-05	4.7473e-05	3.73682e-05	7.8625e-05	7.60782e-05	6.49944e-05	5.99261e-05	-1.23089e-05	-1.13036e-05	-4.60918e-07	2.54931e-05	6.90289e-05	6.06695e-05	3.09791e-05	-1.03125e-05	-2.24362e-05	-0.000146947	-0.000459454	-0.000851533
541.602	0	-1.13553e-05	1.21821e-05	-4.77049e-05	-1.13709e-05	5.38525e-06	-2.6178e-06	1.86251e-05	2.56805e-05	4.14289e-05	-4.50515e-05	-4.94188e-05	-5.37861e-05	-5.81535e-05	-6.25208e-05	-4.95288e-05	-1.37651e-05	2.02439e-05	-7.81224e-06	-2.46763e-05	7.09227e-06	-3.85329e-05	-1.98259e-05	4.64854e-05	1.9421e-06	3.18523e-06	2.19577e-05	3.96984e-06	-2.27052e-05	-3.65971e-05	-1.53496e-05	-7.61504e-07	-7.20966e-06	1.9177e-05	1.89398e-05	-8.86613e-06	-7.50423e-06	-4.79588e-05	-9.3697e-05	-5.11837e-05	-4.84512e-05	-3.98599e-05	-4.51056e-05	-3.9798e-05	-7.43413e-06	1.4796e-05	-0.000144673	-0.000472079	-0.000850102
542.258	0	-2.54427e-05	-1.49378e-05	-4.17892e-05	-1.76687e-05	3.53147e-06	7.59784e-05	-3.50179e-06	4.64631e-05	4.8322e-06	-4.50015e-05	-4.68331e-05	-4.86647e-05	-5.04962e-05	-5.23278e-05	-4.21944e-05	-4.31076e-05	-3.04425e-05	-8.28624e-06	1.94236e-06	-2.32593e-05	-2.79502e-05	-3.74524e-05	-4.27444e-05	-3.12306e-05	1.48562e-05	-3.12634e-05	-6.93587e-05	-4.11389e-05	1.18378e-05	-4.28787e-06	-2.80028e-05	6.44974e-07	4.48672e-06	9.93224e-06	-1.74199e-05	-5.88103e-05	-2.5382e-05	-2.13045e-05	-7.56027e-06	-4.04009e-06	-1.90523e-05	-2.28088e-05	-4.37385e-05	-4.05443e-05	-6.48121e-05	-0.000187988	-0.000441959	-0.000788094
542.915	0	-2.88156e-05	9.61152e-06	7.98965e-06	-2.87611e-05	-1.79149e-05	-2.00946e-05	-1.88471e-05	-2.0835e-05	7.03445e-05	-1.42916e-05	-1.93352e-05	-2.43789e-05	-2.94225e-05	-3.44662e-05	4.36328e-07	3.57607e-05	9.90826e-06	-3.97225e-05	-4.88991e-05	-1.47632e-05	-1.47476e-05	1.80583e-05	3.35509e-05	3.05341e-05	1.23066e-05	-2.59635e-05	-4.01588e-05	-1.28774e-05	1.88793e-05	6.51115e-06	-7.55584e-06	-5.2255e-06	1.29312e-05	3.90753e-06	1.61408e-05	1.86467e-05	2.80072e-05	1.44393e-05	3.23786e-05	-3.10327e-05	-3.08433e-05	-6.55164e-06	-2.60153e-05	-7.30454e-05	-7.59946e-05	-0.000155276	-0.000416672	-0.000837012
543.571	0	-2.29027e-05	-3.6317e-05	-1.69844e-05	4.04756e-05	4.54463e-06	2.87288e-06	4.01992e-05	1.95903e-05	5.72963e-07	2.41807e-05	2.54562e-05	2.67316e-05	2.80071e-05	2.92826e-05	-8.80786e-07	-1.62243e-05	3.63649e-06	-1.83345e-06	3.99872e-06	-7.00162e-06	-1.25469e-05	2.04043e-05	6.09675e-05	5.44432e-05	-4.96779e-05	-6.53337e-05	-3.74026e-05	-4.38249e-05	-3.98152e-05	-3.23625e-05	-3.35925e-05	1.83091e-05	-1.34164e-05	-2.60605e-05	-3.47646e-05	-3.8064e-05	-4.09676e-05	-1.49945e-05	-6.32427e-05	-9.36479e-05	-4.23206e-05	3.68748e-05	1.45328e-05	-4.81433e-06	-4.25427e-05	-0.000126957	-0.000460254	-0.000858182
544.227	0	-3.00174e-05	1.40713e-05	1.91834e-05	-1.88611e-05	4.17911e-05	-4.30272e-05	6.64287e-07	1.49667e-05	2.18329e-06	-5.5168e-05	-5.78081e-05	-6.04481e-05	-6.30881e-05	-6.57281e-05	-3.24007e-05	-8.67778e-06	-3.53022e-05	-3.80486e-05	-2.32241e-06	-4.75179e-05	-2.54997e-06	1.17027e-05	-4.18839e-05	-8.25117e-05	2.44674e-05	-3.46764e-05	-1.64135e-05	-3.26203e-05	-0.000118023	-7.18535e-05	-1.32046e-05	-1.76436e-05	-6.77143e-06	-2.3305e-05	1.09766e-05	-2.19951e-05	-1.70191e-05	-2.26773e-06	-2.25281e-05	-3.07379e-06	-2.49852e-05	1.85648e-05	1.51143e-06	-1.30522e-06	-4.29298e-05	-0.000189364	-0.000520029	-0.000913186
544.884	0	2.94617e-05	1.99506e-05	-8.2629e-06	2.2729e-06	7.29989e-06	-2.27819e-05	-4.79932e-05	-1.87865e-05	1.00189e-05	1.67221e-05	1.68274e-05	1.69326e-05	1.70378e-05	1.7143e-05	3.51301e-05	2.96197e-05	9.71443e-06	-1.73656e-05	6.6024e-06	3.07886e-05	2.66534e-05	4.02432e-05	5.95307e-05	2.34273e-05	1.29666e-05	-3.33366e-07	8.29655e-06	-1.68868e-05	-6.36243e-05	-4.26244e-05	-3.96388e-05	-5.6854e-05	-4.84114e-06	-2.06642e-05	2.24333e-05	-1.13556e-05	-4.25825e-05	-1.80095e-05	-1.0283e-05	-1.18109e-06	6.10457e-06	2.71929e-05	9.06051e-06	3.77791e-05	3.56729e-05	-0.000115073	-0.000388613	-0.000854594
545.541	0	-3.71878e-05	-6.50027e-05	-2.67348e-05	3.79428e-05	3.10071e-06	7.51163e-05	-1.83444e-05	-2.40537e-05	-1.09003e-05	4.54062e-05	4.8021e-05	5.06358e-05	5.32507e-05	5.58655e-05	-3.36184e-05	-6.71607e-05	8.3197e-06	3.83656e-05	-1.85544e-05	3.81667e-05	3.65155e-05	-3.73425e-05	4.49327e-05	2.66941e-05	2.73512e-05	5.55939e-06	-1.04535e-05	-0.000106793	-5.91279e-05	3.83881e-06	-3.0323e-05	-0.00010075	-4.8003e-05	-1.86535e-05	-3.81476e-05	-5.05927e-05	-1.94599e-05	-2.3291e-05	-5.80045e-05	-7.09464e-05	1.92311e-06	2.00022e-05	1.73169e-05	1.54601e-05	-8.73118e-05	-0.000177654	-0.000494425	-0.000883815
546.197	0	-4.08211e-06	-1.62191e-05	6.27428e-06	2.90283e-06	1.63011e-05	-2.57548e-05	5.10431e-05	-3.82105e-06	-4.06753e-06	1.83385e-05	1.92769e-05	2.02154e-05	2.11539e-05	2.20924e-05	3.67039e-05	2.60646e-05	3.60626e-05	-1.36265e-05	3.18734e-05	-1.41994e-05	5.15217e-05	5.75953e-05	0.000120923	6.21769e-05	6.25725e-05	1.35824e-05	5.12985e-05	4.18664e-05	8.50336e-05	6.11749e-05	2.01552e-05	5.86345e-05	7.78499e-06	8.74653e-06	6.10881e-05	7.29276e-05	3.96579e-05	5.6738e-05	3.15619e-05	3.39925e-05	2.95935e-05	5.44135e-05	5.64368e-05	2.81098e-05	1.98575e-05	-0.000124781	-0.000474789	-0.000826967
546.854	0	-5.93206e-05	-1.99161e-05	2.03587e-05	4.00102e-06	8.05226e-05	7.47383e-05	-2.59582e-05	-7.29675e-05	4.72585e-06	7.90069e-06	7.25697e-06	6.61326e-06	5.96954e-06	5.32583e-06	-1.14715e-05	6.22274e-05	6.80675e-05	-2.44182e-05	-1.29607e-05	3.30621e-05	-3.07566e-05	5.63591e-05	1.53395e-05	-4.44539e-05	-8.10861e-08	-4.08622e-05	-7.90907e-06	-1.30804e-05	1.19139e-05	-1.30264e-05	-7.38279e-06	-2.57926e-06	-2.08267e-06	-3.96944e-05	2.02614e-05	2.73166e-05	3.39314e-05	-1.83414e-07	-9.49963e-06	-3.14659e-05	3.6497e-05	1.4861e-05	-1.69518e-05	2.23443e-05	-6.46852e-05	-0.000163663	-0.000367203	-0.000806772
547.511	0	1.21232e-05	5.41525e-06	3.82269e-05	-3.71455e-05	-6.43649e-05	-6.87099e-06	-3.27076e-06	-5.28605e-06	7.60269e-07	-5.7162e-05	-5.9994e-05	-6.2826e-05	-6.56579e-05	-6.84899e-05	-3.18127e-05	-5.68298e-05	-3.67883e-05	-5.01703e-05	3.25182e-05	-2.36159e-05	-1.19457e-05	5.25772e-05	3.91296e-05	3.06414e-05	2.06861e-06	4.35466e-05	3.73238e-05	7.34045e-05	-3.08269e-05	-2.90797e-05	-1.95725e-05	-1.26636e-05	-9.80054e-05	-6.04742e-05	-4.0472e-05	2.05286e-05	-6.61003e-06	-8.60803e-05	-1.44888e-05	1.34913e-05	-2.09976e-05	-1.67256e-05	-1.66739e-05	-3.04706e-05	-3.03655e-05	-0.000187	-0.000482686	-0.000839889
548.168	0	3.18374e-05	-3.56295e-05	-3.07806e-05	1.91788e-05	-3.09776e-05	5.02733e-06	2.24469e-05	-2.18147e-05	5.37012e-05	-6.38226e-05	-7.02308e-05	-7.66389e-05	-8.3047e-05	-8.94551e-05	1.3917e-05	-8.13264e-06	5.05509e-06	-1.65393e-05	-4.59622e-06	-8.0273e-05	2.51275e-05	6.78541e-05	6.63982e-05	-5.11097e-05	-3.64047e-05	2.47641e-05	1.22404e-05	2.04741e-05	1.06869e-05	0.000119113	4.012e-05	6.35483e-05	0.000109964	-1.21757e-07	2.14554e-05	-9.62009e-07	-1.09991e-05	-7.95132e-05	-1.18407e-05	4.31979e-05	-1.28165e-05	-1.82419e-05	-1.42938e-05	-2.0637e-05	-1.29299e-05	-0.000112331	-0.000457413	-0.000830399
548.825	0	-2.33682e-05	8.48647e-06	-4.03126e-05	-6.82522e-05	-2.56007e-05	1.12093e-05	1.28912e-05	6.2775e-05	5.46067e-05	1.43419e-05	1.25856e-05	1.08293e-05	9.07296e-06	7.31665e-06	8.19658e-06	2.73944e-05	-4.22013e-05	-7.57826e-05	-8.44758e-06	-2.97428e-05	-7.57029e-05	2.7327e-05	0.000125926	1.01154e-05	-1.51577e-06	-9.58764e-06	2.07839e-05	-2.27209e-06	-2.56529e-05	1.15123e-05	5.15074e-05	5.66855e-05	1.08387e-05	8.70779e-06	6.42135e-05	5.95668e-05	2.98524e-05	-2.61587e-05	3.09179e-05	7.00343e-06	-5.83723e-05	-6.15005e-05	4.25918e-05	-2.29075e-06	-7.00513e-05	-2.38375e-05	-0.000430932	-0.000859055
549.482	0	2.98849e-05	8.37816e-06	-3.97084e-05	2.36355e-05	3.24092e-05	-6.28628e-06	-3.67137e-05	-3.72733e-05	1.22488e-05	9.87221e-05	0.000102398	0.000106074	0.00010975	0.000113426	-1.06374e-05	-2.25775e-05	6.41893e-08	-9.22335e-06	3.79782e-05	3.37845e-05	2.12642e-05	-2.1089e-05	1.51093e-05	-4.68876e-05	4.01299e-05	8.62769e-05	2.91363e-05	1.22689e-05	3.35291e-05	6.12738e-06	4.79123e-05	-4.60501e-05	5.5757e-05	0.000112486	-3.91628e-06	2.16523e-05	6.94808e-05	7.90106e-05	4.62733e-05	7.94815e-05	6.15383e-05	7.11667e-05	6.14367e-05	-6.09722e-07	3.74596e-05	-8.34672e-05	-0.000448394	-0.000842689
550.139	0	1.83806e-05	-5.48735e-05	-9.93501e-06	3.64273e-05	1.56678e-05	-6.54595e-06	4.25831e-05	-3.50551e-05	-2.33735e-05	-4.16709e-05	-4.27961e-05	-4.39214e-05	-4.50467e-05	-4.58234e-05	-2.86366e-05	-3.14499e-05	-1.03471e-05	-6.43684e-05	-5.20556e-05	-7.72683e-06	-4.36486e-05	-2.72672e-05	2.53188e-05	-1.31729e-05	-8.11653e-06	-5.97319e-05	-3.1863e-05	4.81965e-05	4.24755e-05	-1.4774e-05	-1.82712e-05	-2.38712e-05	-1.66124e-05	-3.26548e-05	-5.56635e-05	-4.19637e-05	4.16893e-05	2.5538e-05	6.78987e-05	1.58058e-07	-4.70453e-06	-7.68916e-06	5.45443e-05	6.40124e-05	-4.10571e-05	-0.000154125	-0.000475599	-0.000793384
550.796	0	-2.06444e-05	-4.12527e-05	1.13366e-05	-7.97226e-06	2.19582e-05	7.71064e-06	4.56317e-06	1.05252e-05	-3.19129e-06	6.04215e-05	6.35749e-05	6.67283e-05	6.98817e-05	7.17835e-05	4.79961e-05	-2.87078e-05	1.11061e-05	3.72541e-05	3.00349e-05	-1.46866e-05	6.56331e-05	-1.02373e-05	3.50011e-05	9.47753e-05	6.97919e-05	-5.13651e-05	-6.0084e-05	2.17527e-06	8.06114e-05	5.0854e-05	1.81863e-05	-4.48269e-06	-1.27129e-05	5.33766e-06	-1.62583e-05	1.06093e-05	5.06913e-05	-4.51135e-05	1.47993e-05	4.70475e-05	-3.6612e-05	-3.1909e-05	5.14116e-05	2.52456e-05	4.0919e-05	-8.19843e-07	-0.000393243	-0.000721165
551.453	0	-6.11832e-06	-2.28801e-05	1.24679e-06	1.26479e-05	-5.47411e-05	-1.81861e-05	3.07258e-05	8.47695e-07	3.26734e-05	2.68448e-05	2.62275e-05	2.56103e-05	2.4993e-05	1.91194e-05	-3.69879e-05	-3.75623e-05	1.08508e-05	-3.94187e-05	2.19509e-05	-1.34241e-06	-5.66264e-05	-7.50571e-05	-7.17677e-06	5.66767e-06	-5.92592e-05	-3.80212e-05	-1.26425e-06	4.21982e-05	6.5219e-05	3.41123e-05	1.33872e-05	-7.90114e-06	1.93878e-05	-1.77203e-05	-3.92152e-05	1.21025e-05	-6.48365e-05	6.81105e-05	3.57439e-05	3.10089e-05	-2.79362e-05	5.06868e-05	-2.84209e-06	-4.45583e-06	-4.68958e-05	-0.000142958	-0.000445593	-0.000723391
552.11	0	-4.96972e-05	-1.36662e-05	-4.66671e-05	4.53826e-06	1.01202e-05	-1.9305e-05	3.95317e-05	6.71644e-06	2.49398e-05	2.59855e-05	2.58054e-05	2.56253e-05	2.54452e-05	2.52429e-05	1.52813e-05	-4.81565e-05	-3.33691e-06	-1.97093e-05	-5.52014e-05	-3.05318e-05	-4.43317e-05	8.01211e-05	5.15608e-05	-4.21385e-05	-2.7153e-05	5.0447e-05	-6.7925e-05	-6.45781e-06	1.65618e-05	2.04048e-05	3.73496e-05	6.01119e-06	-7.3631e-06	1.2134e-05	4.07793e-05	-7.91127e-05	-8.10778e-05	3.4806e-05	8.18589e-05	-2.36997e-05	-1.89065e-06	-3.89792e-05	-3.62666e-05	-5.38975e-06	-7.00175e-08	-0.000135447	-0.000403655	-0.000654685
552.768	0	-1.84898e-05	-7.43478e-06	5.53194e-05	-2.57533e-05	-1.67592e-05	2.75269e-06	5.43109e-05	-7.80598e-06	-9.60862e-07	9.30231e-06	9.61779e-06	9.93328e-06	1.02488e-05	6.92558e-06	-8.32397e-06	1.7304e-05	2.67901e-05	6.47461e-06	-5.59766e-06	1.00728e-06	4.53322e-05	3.69322e-05	9.26296e-05	-9.10709e-06	-7.01569e-07	-7.85123e-06	1.08807e-05	3.43982e-05	3.66605e-05	4.16495e-05	0.000119854	2.77133e-05	6.93353e-05	4.94868e-05	5.08327e-05	1.929e-05	1.50948e-06	-9.79942e-06	-2.6702e-06	2.18422e-05	9.54223e-06	-2.81485e-05	1.31382e-05	3.44782e-05	-8.76437e-06	-0.00014129	-0.000413784	-0.000626028
553.425	0	5.18811e-05	-1.92779e-05	-2.85561e-05	-2.77259e-05	-2.56738e-05	-1.94828e-05	-2.46462e-05	1.42933e-05	1.33812e-05	3.94796e-05	4.07802e-05	4.20807e-05	4.33813e-05	4.52211e-05	3.80485e-05	-1.01865e-06	3.18213e-05	5.43305e-05	3.3669e-05	4.64521e-05	3.16945e-05	2.1026e-05	4.90828e-05	8.53404e-05	5.50712e-05	6.23154e-05	6.27226e-06	-1.78758e-05	2.03034e-05	4.44815e-05	5.50586e-05	3.65583e-05	6.12422e-06	9.34789e-05	7.31514e-05	5.3148e-05	3.72063e-05	2.94684e-05	2.43212e-05	3.51639e-06	-8.72436e-05	4.44713e-05	2.58051e-06	-4.08858e-05	-7.0475e-05	-8.23111e-05	-0.000425609	-0.000641309
554.083	0	-4.24358e-05	-1.92763e-05	-2.30166e-05	5.77052e-05	2.7979e-05	-1.2193e-05	2.60264e-05	-2.77288e-05	4.13662e-06	2.52095e-05	2.58433e-05	2.64771e-05	2.71109e-05	1.58745e-05	-2.21696e-05	-1.7185e-05	-2.46701e-05	2.98889e-06	-2.26169e-05	-3.18863e-05	-6.04337e-05	-1.79706e-05	-2.15118e-05	4.03668e-06	-2.35482e-05	1.35124e-05	-8.15402e-06	-1.2932e-05	-5.58703e-05	1.62793e-05	5.19388e-06	-3.21525e-05	-1.2226e-05	5.79369e-05	4.65377e-05	5.82304e-05	-1.17285e-05	-3.30562e-05	2.52424e-05	-2.02327e-06	2.18309e-05	-5.62169e-05	-6.40679e-05	-5.46095e-05	2.10092e-05	-0.000119618	-0.00046552	-0.000711237
554.74	0	1.13074e-05	2.85554e-05	3.78271e-05	-4.22389e-06	-4.34368e-05	-3.84923e-05	-2.93458e-06	-1.12878e-05	-1.11456e-05	7.15577e-06	7.99472e-06	8.83367e-06	9.67263e-06	4.6821e-06	-9.60565e-07	3.53897e-05	4.46019e-05	2.25973e-05	1.15148e-06	-2.3357e-05	8.56793e-06	-1.39737e-05	9.55689e-06	-1.83967e-06	-2.0833e-05	-5.05416e-05	-4.93339e-05	-2.28006e-05	-8.03228e-06	-2.39159e-06	-6.90342e-06	2.02033e-05	-3.29362e-06	6.65519e-06	8.07837e-06	-6.99234e-05	-1.61209e-05	-3.62216e-05	-3.1985e-05	-1.40383e-05	1.29062e-05	-1.37989e-05	6.76439e-06	-8.81599e-05	-3.29966e-05	-0.00016239	-0.000437218	-0.00063645
555.398	0	-7.85213e-06	9.24339e-06	2.57578e-05	-4.77911e-06	1.88673e-05	1.99844e-05	-1.69809e-05	-9.6703e-05	1.43133e-05	1.08181e-05	9.6405e-06	8.46285e-06	7.28521e-06	-1.90285e-05	-4.35515e-05	3.78563e-05	-6.20426e-06	-4.41169e-05	-2.32857e-05	3.54664e-05	3.15395e-05	-1.8883e-05	2.99893e-05	-1.01776e-06	2.46143e-05	1.31652e-05	3.73131e-05	1.20689e-05	2.92246e-05	3.29586e-05	3.96292e-05	2.31254e-05	1.04968e-05	2.14897e-05	-2.5505e-05	-5.90247e-05	-7.32248e-05	-4.10769e-05	-6.50808e-06	7.5773e-06	-5.82847e-05	-3.52703e-05	9.04956e-06	-1.88362e-06	3.86372e-05	-6.48165e-05	-0.000398845	-0.000624386
556.055	0	-8.17334e-06	7.49849e-06	2.8146e-05	2.98758e-05	-4.44601e-05	-3.68352e-05	-1.10816e-05	2.89054e-05	3.83855e-07	-2.82421e-05	-2.93035e-05	-3.03649e-05	-3.14263e-05	-2.4276e-05	1.99524e-05	7.07009e-05	4.80409e-05	2.98461e-05	3.32631e-05	4.52381e-05	3.16387e-05	3.51822e-05	3.55817e-05	4.6703e-05	-6.41492e-06	-2.05207e-05	-1.83661e-05	-3.84432e-05	-3.17799e-05	-4.97385e-05	-4.62416e-05	-4.25728e-05	-2.81531e-05	-2.91506e-05	-6.73651e-05	-1.69394e-05	1.53669e-05	-1.17573e-05	-1.42952e-05	2.52187e-05	5.02669e-05	6.8245e-05	5.06794e-05	4.42718e-05	2.79222e-05	-0.000156915	-0.000437061	-0.000665176
556.713	0	1.09597e-05	9.49297e-06	-4.7013e-06	1.45368e-05	1.24906e-05	-7.25214e-05	-5.82173e-06	2.51167e-05	3.52776e-05	-1.17262e-05	-1.3985e-05	-1.62438e-05	-1.85026e-05	-3.55437e-05	-4.26753e-05	-2.24415e-05	-3.57721e-05	1.12745e-05	-1.28333e-05	-6.7172e-05	-2.18405e-05	-5.54511e-05	-3.81559e-05	1.92369e-05	4.59231e-06	-8.13283e-07	-1.71578e-05	6.16987e-06	-2.83008e-05	-1.19328e-05	7.02716e-06	2.21628e-05	7.42398e-06	-9.85518e-06	-1.31377e-05	1.34951e-05	5.68355e-06	-3.85304e-05	-5.2946e-05	-4.34189e-05	-1.62287e-05	3.12214e-06	1.82316e-05	-3.4763e-06	-4.48277e-05	-4.84796e-05	-0.000386437	-0.000663495
557.371	0	-4.52975e-05	-7.34294e-05	-3.20736e-05	3.14807e-05	2.56993e-05	-1.9544e-05	-1.05297e-05	5.89757e-05	4.64083e-05	3.64537e-06	1.83424e-06	2.31122e-08	-1.78802e-06	-3.47782e-05	-2.84765e-05	4.2697e-05	-7.65416e-06	-6.32528e-06	2.12769e-05	-2.01405e-05	3.44611e-05	8.63854e-05	7.69046e-05	8.68897e-05	5.30967e-05	8.31873e-06	1.76046e-05	4.73388e-05	2.61051e-05	1.69689e-05	1.23534e-05	-6.44169e-06	1.94069e-05	-9.94826e-07	6.44539e-06	4.88308e-05	7.4248e-05	1.74192e-05	4.1946e-05	1.87664e-05	2.63513e-05	4.62304e-05	4.99563e-05	4.30178e-05	-3.99463e-06	-0.000139996	-0.000410724	-0.000649947
558.029	0	-1.26796e-06	-1.47063e-05	9.40017e-06	4.05111e-06	5.35546e-05	-6.32683e-05	-9.11356e-06	3.08969e-06	-8.27554e-06	3.58452e-05	3.7993e-05	4.01407e-05	4.22885e-05	3.35463e-05	9.5591e-07	-5.90861e-05	-7.61846e-05	-2.78886e-05	-9.61732e-06	-3.11963e-05	-1.22956e-05	7.84651e-05	7.25968e-05	2.37925e-05	1.78041e-05	4.59087e-05	3.36941e-05	4.8258e-05	-1.85851e-05	-3.09324e-05	1.00371e-05	-1.6216e-05	-4.6766e-07	-2.91305e-06	-4.20219e-06	-2.66794e-05	-6.57537e-06	-8.84902e-06	-3.26419e-05	2.47415e-05	3.79558e-05	2.34272e-05	5.78423e-05	1.7348e-05	-4.20321e-06	-0.000149144	-0.000445565	-0.000633516
558.687	0	1.96515e-05	-1.73594e-05	6.54128e-07	2.87637e-05	5.4802e-05	1.15558e-05	-2.49869e-05	-9.8078e-06	-4.25917e-05	1.27747e-05	1.56332e-05	1.84917e-05	2.13501e-05	-9.03473e-06	-3.26445e-05	7.61338e-06	3.76548e-05	6.55007e-06	-1.47864e-05	-3.80389e-06	-4.87058e-05	-1.9384e-05	7.23171e-06	-5.7657e-05	-2.83154e-05	-1.36103e-05	-2.90901e-05	4.67412e-06	1.04229e-05	-2.45551e-05	-2.92024e-05	-1.30625e-05	-6.63157e-05	-6.64973e-05	5.41034e-06	1.13257e-05	-9.89181e-06	-1.27822e-06	1.48777e-05	-8.2504e-06	-2.36619e-05	-3.87281e-06	-8.70319e-07	-1.01142e-05	-1.43363e-05	-0.000168536	-0.000471447	-0.00070282
559.345	0	-2.38077e-05	-8.19219e-06	6.92987e-05	3.71946e-05	-3.19068e-05	-5.26825e-06	-6.81424e-05	-5.06736e-05	2.92151e-05	5.73297e-05	5.80661e-05	5.88025e-05	5.95388e-05	8.58538e-06	-2.48267e-05	-5.74822e-06	-1.00892e-06	-2.1548e-05	-3.74935e-05	1.6423e-06	1.75669e-05	1.38654e-05	1.31428e-05	4.83824e-06	-2.83184e-05	-1.13471e-05	3.89676e-05	1.55877e-05	-3.37723e-05	-3.56971e-05	-3.89667e-05	-4.39351e-05	-1.68016e-05	-1.91767e-05	7.74941e-06	3.02219e-05	3.19076e-06	-2.03517e-05	-2.027e-05	-2.65173e-05	1.42821e-05	4.79569e-05	-1.17724e-05	-3.67359e-05	3.48973e-06	-0.000100031	-0.000381505	-0.000606225
560.003	0	-4.78762e-05	-3.58616e-05	3.67228e-05	2.87845e-05	5.50546e-05	-4.03639e-05	-7.97314e-05	1.34686e-05	2.78587e-05	5.60181e-05	5.73363e-05	5.86544e-05	5.99726e-05	-9.81942e-06	-6.41376e-06	2.96249e-05	-1.28076e-05	-5.86533e-05	-7.25793e-05	-2.63741e-05	-6.25156e-06	-1.94099e-05	-1.51754e-05	-8.73374e-06	-3.39302e-05	-5.38352e-05	-5.28613e-05	-2.71808e-05	-3.47797e-06	-5.00228e-06	-4.128e-05	-6.37441e-05	8.21788e-06	4.40538e-05	-6.78324e-06	8.99954e-06	-1.35293e-05	-5.62299e-06	1.42811e-05	-1.48962e-05	-1.09809e-05	-1.25032e-06	1.23776e-06	-1.9891e-05	-2.42022e-05	-0.000150321	-0.000430952	-0.000622437
560.661	0	-5.55511e-05	1.56092e-05	-3.85858e-05	-7.43097e-06	-2.15933e-05	2.78202e-05	-5.78754e-05	4.50486e-05	6.06897e-05	3.71343e-05	3.60653e-05	3.49964e-05	3.39274e-05	9.23216e-06	-3.49141e-05	-3.6867e-05	-1.80013e-05	-1.09948e-05	1.58801e-05	-1.25516e-05	-8.51345e-06	6.16698e-05	5.85564e-05	5.91427e-05	5.81787e-05	2.96408e-05	4.83908e-05	6.5184e-05	7.02211e-05	7.12229e-06	-6.41055e-05	-1.64375e-05	2.5233e-05	-2.16048e-05	-2.62272e-05	3.51331e-05	2.55558e-05	9.26851e-06	2.76857e-05	3.01819e-05	-2.67474e-05	-5.53296e-06	2.83549e-05	1.98145e-06	-2.9405e-05	-0.000194459	-0.000422272	-0.000678641
561.319	0	3.67179e-05	-2.55899e-05	-5.2204e-05	-9.66508e-06	-5.61315e-05	2.24398e-06	-1.34951e-05	-3.79614e-05	-3.19936e-06	3.3437e-05	3.48559e-05	3.62749e-05	3.76938e-05	-2.57993e-05	-8.06456e-06	1.09592e-05	-3.23866e-05	-6.33899e-06	3.29736e-05	6.24784e-05	3.59744e-05	8.75737e-06	3.332e-05	4.48507e-05	-4.88693e-06	-3.58203e-05	1.46187e-05	6.97626e-05	1.85055e-05	1.04313e-05	-2.11404e-05	-1.12177e-05	9.9103e-06	4.13656e-05	1.54857e-05	1.05428e-05	4.56323e-06	-3.68185e-05	-3.35911e-05	1.02731e-06	9.4828e-06	4.36261e-05	7.0289e-06	-4.56319e-05	-6.92899e-05	-0.000158434	-0.000423799	-0.00066305
561.977	0	1.95982e-05	1.23593e-06	-5.21503e-05	-6.96005e-05	2.67776e-05	1.233e-05	2.989e-06	1.06283e-05	2.63162e-05	-8.46671e-05	-8.99053e-05	-9.51436e-05	-0.000100382	-1.08049e-05	5.66855e-05	-1.10085e-05	-4.25078e-05	-5.0068e-05	-6.56851e-05	-2.5968e-05	6.96105e-05	9.29305e-05	3.30178e-05	2.38833e-05	1.49345e-05	3.67429e-05	-8.78226e-07	-4.46508e-05	-7.49239e-05	-4.5464e-05	1.50794e-06	7.16598e-06	2.43406e-05	5.07073e-05	3.58835e-05	2.6924e-05	1.59169e-05	-1.39996e-05	-1.02676e-05	9.04021e-06	2.47726e-05	6.00653e-05	8.95054e-06	1.84728e-05	-3.97262e-05	-0.000161402	-0.000414061	-0.000687491
562.635	0	3.34727e-06	-7.36922e-05	7.1325e-05	-3.48145e-05	1.38964e-05	2.59879e-06	5.06453e-05	-2.76207e-05	1.18074e-05	3.64113e-05	3.71704e-05	3.79295e-05	3.86886e-05	-2.71108e-05	-3.82147e-06	6.41017e-05	2.87096e-05	-3.37877e-06	-2.18159e-05	3.60046e-05	3.58287e-05	-2.20604e-05	-2.8388e-05	2.16101e-05	-3.48523e-05	-1.95259e-05	1.84172e-05	1.77026e-05	-5.22587e-05	1.89916e-06	-3.50193e-05	-2.65243e-05	4.5916e-05	6.80915e-06	2.0177e-05	3.25801e-05	9.08027e-06	-1.60359e-05	-2.33544e-05	2.13237e-05	9.13629e-05	8.55058e-05	-3.37702e-06	7.57544e-06	1.75907e-05	-0.000129451	-0.000433041	-0.000654959
563.294	0	3.09048e-06	3.73398e-05	1.25213e-05	-5.88157e-06	-4.12396e-05	-6.54615e-06	2.37738e-05	-4.70278e-05	2.03302e-05	8.52517e-05	8.76899e-05	9.01281e-05	9.25664e-05	-4.8225e-05	-5.07515e-05	3.80029e-06	2.41471e-05	6.50707e-06	8.4106e-06	2.40953e-05	4.4149e-05	7.32501e-05	0.00011578	5.14419e-05	-3.29728e-05	-3.77239e-05	-3.49892e-06	-4.64293e-06	2.07995e-05	-2.28074e-05	-1.05018e-06	5.0945e-05	4.30575e-05	-8.95752e-06	1.67487e-05	-3.99396e-05	-2.60074e-05	2.47059e-05	1.27756e-05	9.54938e-06	-1.14616e-05	8.89998e-05	1.05585e-05	-1.85939e-05	1.63112e-05	-9.42625e-05	-0.000415976	-0.000669432
563.952	0	-3.60602e-05	4.72396e-05	4.2065e-05	2.22701e-05	-3.12466e-05	5.47318e-06	2.45902e-05	-6.80588e-05	-2.73217e-05	-4.40339e-05	-4.51875e-05	-4.63411e-05	-4.74948e-05	-2.17894e-05	2.29378e-05	6.3091e-06	8.69919e-06	-6.80515e-05	-3.03596e-05	-5.69658e-05	-3.89295e-05	-9.98995e-06	3.26965e-05	7.26151e-05	6.05379e-05	9.07904e-06	1.74617e-05	3.6287e-06	6.63409e-07	4.40605e-05	-1.53461e-05	-5.35917e-05	-9.17832e-06	-2.14048e-06	-6.97766e-06	4.69122e-05	5.27473e-05	1.2557e-05	-1.90732e-05	1.79119e-06	3.16052e-05	4.42921e-05	5.96037e-05	6.34237e-05	6.64056e-05	-9.52467e-05	-0.000384841	-0.000682597
564.61	0	-4.87722e-05	1.24132e-05	-2.38371e-05	1.24515e-05	3.5815e-05	-4.32074e-05	6.68175e-06	5.69989e-05	1.34765e-05	-1.6989e-07	-4.55451e-07	-7.41011e-07	-1.02657e-06	-3.66803e-05	-3.85238e-06	-1.19483e-05	1.18102e-05	1.06261e-05	3.36795e-05	4.96704e-05	8.76097e-06	2.83605e-05	5.62341e-05	-7.582e-06	6.33674e-06	-2.02184e-05	-1.77292e-05	-6.8834e-06	-1.81891e-05	-8.98759e-06	-3.22927e-05	-1.98242e-05	-4.38479e-06	2.03688e-05	-3.36618e-06	3.11482e-05	3.99419e-05	-2.64589e-05	-9.14155e-05	-8.18992e-05	-5.89302e-05	3.01295e-05	1.92269e-05	3.10919e-05	3.3197e-05	-0.000132431	-0.000418361	-0.000727149
565.269	0	2.86362e-05	-2.61492e-05	1.63146e-06	-1.98669e-05	-3.45053e-05	1.70651e-05	1.76396e-06	2.52476e-05	2.13413e-05	-1.63169e-05	-1.79926e-05	-1.96683e-05	-2.13441e-05	6.21197e-06	-2.00562e-05	2.80709e-05	-2.35305e-05	-4.69798e-06	-4.45731e-05	-5.37866e-05	-2.21039e-05	7.02686e-05	-8.71885e-06	-4.4162e-05	2.33203e-05	6.56541e-05	-1.54956e-05	5.9525e-05	-4.94467e-05	-8.59017e-05	-6.00196e-06	-3.15476e-05	-2.98772e-05	-5.34624e-05	-2.25814e-05	3.3665e-05	2.82607e-05	-3.4724e-05	-9.87096e-06	-4.08378e-05	-4.57952e-05	-3.95166e-05	8.42241e-07	3.51047e-05	1.83116e-07	-0.000136439	-0.000402394	-0.000678
565.928	0	-1.42006e-05	-4.73489e-05	7.48894e-05	2.19951e-05	-1.32636e-05	-9.8522e-06	-3.77507e-06	-7.1408e-06	-3.84926e-05	6.02856e-06	8.27668e-06	1.05248e-05	1.27729e-05	-4.02125e-05	-2.26503e-05	3.55396e-05	-1.6562e-05	-6.60195e-05	-5.77121e-06	-2.48214e-05	-1.61788e-05	9.42015e-06	1.89547e-05	2.21756e-05	3.38937e-05	-3.68441e-05	4.89869e-05	1.74969e-05	5.98831e-05	4.12241e-05	-8.31711e-06	-1.96209e-05	-1.26287e-05	-2.01025e-05	-4.47684e-06	-1.45824e-05	-9.16679e-05	-4.7741e-05	-2.83703e-06	-7.38519e-05	-5.19542e-06	5.59939e-06	3.12666e-05	-3.85003e-05	-7.19826e-05	-0.000152195	-0.000399794	-0.000671028
566.586	0	-1.16385e-05	-3.99503e-05	8.24855e-05	9.43184e-05	5.9007e-05	-1.64975e-05	-7.21347e-05	-4.3954e-05	9.25818e-07	1.96424e-06	1.74759e-06	1.53094e-06	1.31429e-06	-2.51842e-05	-2.83749e-05	7.53229e-05	4.13179e-05	-1.34344e-05	-2.12309e-05	-6.98199e-05	2.19125e-05	4.60101e-05	-6.36764e-06	-2.90701e-05	-3.94772e-05	4.73995e-05	3.64115e-05	-4.83282e-05	5.04811e-05	8.63146e-05	2.57079e-05	-8.40706e-06	-2.22422e-05	-3.94025e-05	-4.65787e-05	7.16965e-06	-3.98909e-06	1.8536e-05	-4.86874e-05	-1.97813e-06	2.18198e-05	1.17341e-05	5.0855e-06	-4.06791e-05	4.97099e-05	-8.46497e-05	-0.000413998	-0.000690571
567.245	0	4.89861e-05	-3.95707e-05	-7.73137e-05	5.69221e-05	1.21381e-05	-1.82632e-05	4.65847e-05	-6.41301e-05	1.25595e-05	2.93609e-06	1.88114e-06	8.26183e-07	-2.28772e-07	1.823e-05	-7.76506e-05	-1.57861e-05	-6.08877e-07	-3.22231e-05	-1.15819e-05	-0.000102846	4.46393e-06	-2.22949e-05	-1.31115e-05	-3.74657e-05	-1.89771e-05	-4.30502e-05	-4.57178e-05	-1.83506e-05	2.92159e-05	-4.50172e-06	-1.79914e-05	4.53248e-05	3.98255e-06	-4.40134e-05	-3.28603e-05	-2.08824e-05	-3.46212e-06	1.60636e-05	-3.36014e-05	-1.24369e-05	-4.02318e-07	-3.49512e-05	-5.85651e-06	-3.91874e-05	-1.93531e-05	-0.000133608	-0.000411974	-0.000725192
567.904	0	8.75591e-06	-8.14318e-05	1.33965e-05	3.00934e-05	-3.8269e-05	2.46065e-05	-3.44735e-06	1.72286e-05	4.13242e-05	-2.98743e-07	-2.33118e-06	-4.36362e-06	-6.39605e-06	5.84687e-06	8.9555e-06	1.95283e-05	2.43914e-05	2.00961e-05	-2.02754e-05	8.12779e-06	-3.0008e-06	8.06004e-06	-8.62812e-06	9.16038e-06	3.11522e-05	8.48794e-06	-4.07574e-05	3.88755e-05	4.83512e-05	3.22351e-05	5.57085e-05	-6.37921e-05	-2.73972e-05	-2.87186e-05	-3.1795e-05	-7.48667e-05	-3.6918e-05	-3.44745e-05	1.97798e-05	4.87027e-05	9.5729e-05	-3.40933e-05	-1.39013e-05	-1.70224e-05	-1.15196e-05	-9.29609e-05	-0.000322128	-0.000701359
568.563	0	5.4902e-06	-4.83642e-07	4.07953e-05	2.99853e-05	-2.3175e-05	4.09779e-06	-1.88233e-05	-1.38617e-05	-1.71745e-05	-9.63446e-06	-9.26161e-06	-8.88877e-06	-8.51593e-06	-6.32719e-05	-2.50799e-05	-2.89927e-05	-7.06214e-05	-7.67218e-05	2.31097e-05	-1.71461e-05	6.83938e-05	5.76773e-06	9.89853e-06	-1.43734e-05	-4.888e-07	7.24221e-05	-3.7382e-05	4.21755e-05	2.09771e-05	-3.06932e-05	-8.18519e-05	-6.21559e-07	-1.50891e-05	5.12653e-05	-6.22636e-05	-3.75883e-05	-6.92684e-05	-7.82639e-05	2.8363e-05	-5.44307e-05	7.78985e-06	1.32445e-05	-5.03796e-06	-9.63087e-06	-1.01655e-05	-0.000184168	-0.000470187	-0.00066918
569.222	0	-1.71023e-05	-5.26274e-07	-1.23013e-05	6.7458e-05	4.12255e-06	-1.0492e-05	-3.24275e-05	1.49972e-05	-3.54898e-05	-1.37283e-05	-1.23755e-05	-1.10227e-05	-9.6699e-06	-3.51921e-05	1.09114e-05	-0.000114379	-7.06228e-05	-1.40371e-05	2.0113e-05	3.37965e-05	-4.30585e-05	-1.15935e-05	-5.68331e-05	-2.38233e-05	-8.22879e-05	-1.35796e-05	-3.22687e-05	-7.76067e-05	2.39705e-05	2.56025e-05	-1.13091e-05	2.2191e-05	3.14973e-05	-3.67012e-05	-1.51539e-05	-2.43797e-05	-2.49924e-05	1.68495e-05	-6.56623e-05	-1.39851e-05	6.76507e-06	8.63139e-06	-7.36802e-05	-7.79325e-06	9.31043e-06	-8.31869e-05	-0.000466579	-0.000672512
569.88	0	6.04764e-06	-2.11557e-05	3.45611e-05	3.24344e-05	-4.80703e-06	-2.65484e-05	-2.38631e-05	-7.89122e-07	-1.4229e-05	4.29455e-06	5.23944e-06	6.18432e-06	7.12921e-06	-1.49429e-05	-1.91202e-05	6.28191e-05	-2.50177e-05	1.71613e-05	-4.45631e-05	2.92845e-06	-3.5904e-05	3.76021e-05	-2.06051e-05	-3.47809e-05	-9.83719e-05	1.31071e-05	2.40147e-05	-1.96911e-05	-1.90905e-05	3.30843e-05	2.90607e-05	6.53547e-05	-4.54941e-05	3.12464e-05	-8.01281e-05	-7.96402e-05	4.23575e-06	5.20235e-05	-6.0693e-05	2.31648e-07	3.0245e-06	1.04833e-05	8.96946e-06	-4.71185e-05	-5.06216e-06	-6.9302e-05	-0.000461774	-0.000710038
570.54	0	-5.32777e-06	5.03013e-06	-7.5776e-06	-3.10839e-06	-2.42162e-05	1.6231e-05	1.50443e-05	-5.32974e-06	-5.51158e-06	1.98183e-05	2.09534e-05	2.20886e-05	2.38929e-05	5.26268e-05	1.52308e-05	-4.86728e-07	2.39778e-05	-3.51563e-05	5.64975e-05	4.40891e-05	7.14477e-05	-2.51787e-05	3.18522e-05	-8.23025e-06	1.46651e-05	-5.32643e-05	4.53426e-05	-3.9347e-06	4.64342e-05	-2.25255e-05	-4.07692e-05	7.72964e-05	-3.4448e-05	-5.97268e-05	2.37984e-05	2.55746e-05	-7.16234e-05	-1.06389e-05	3.53979e-05	-2.32283e-06	1.56812e-05	4.61407e-05	-8.28201e-06	2.55514e-05	-1.84779e-05	-1.07697e-05	-0.000412081	-0.000653809
571.199	0	-2.66914e-05	-8.27087e-05	5.8544e-05	9.88004e-06	3.2961e-05	3.5442e-05	4.82122e-05	-8.27176e-05	-4.40545e-06	-4.77607e-05	-5.03085e-05	-5.28563e-05	-5.34978e-05	-1.67691e-05	7.9193e-05	0.000101396	-1.00701e-05	-1.89649e-05	-2.94115e-05	7.20897e-05	5.71032e-05	2.77459e-06	-1.41805e-05	5.43466e-06	-3.01827e-05	-1.14416e-05	-7.78559e-05	5.70198e-05	-4.36354e-06	-5.14455e-06	-1.3762e-05	2.76022e-05	-2.7355e-05	-4.56176e-05	6.826e-05	4.17675e-05	-3.0939e-05	-3.60464e-05	-1.72848e-05	-7.05774e-05	2.24948e-05	5.76472e-05	-4.19199e-05	-7.25076e-05	5.58285e-06	-0.000124441	-0.000377604	-0.000615684
571.858	0	4.15806e-05	2.87912e-05	-7.37784e-06	-2.06336e-05	-1.38794e-05	7.36224e-06	-1.78972e-05	-1.37105e-05	-5.52165e-05	7.70232e-06	1.08059e-05	1.39094e-05	1.47518e-05	-6.64255e-06	-2.01488e-06	-1.9337e-05	-6.17904e-05	-4.31501e-05	3.46087e-05	6.77378e-05	8.62255e-05	8.96425e-05	5.49545e-05	3.80783e-05	5.86335e-05	3.98672e-05	1.71485e-05	3.37639e-05	4.26256e-05	-1.3208e-05	2.38178e-05	1.04238e-05	2.22441e-05	4.63611e-05	9.17299e-05	1.96379e-05	1.00789e-05	5.61932e-05	2.41195e-05	-3.58871e-06	-2.82242e-05	5.56272e-05	-2.54082e-05	7.60276e-06	8.71166e-06	-4.36805e-05	-0.000411587	-0.000598866
572.517	0	3.29162e-05	-5.78485e-05	-6.95664e-05	-4.30885e-05	6.9911e-05	2.32638e-05	-5.48157e-07	-1.87558e-05	2.23176e-05	-2.2158e-05	-2.44241e-05	-2.66901e-05	-2.75578e-05	-1.76994e-05	-8.06e-06	1.38646e-07	-5.55382e-05	-3.98153e-05	-8.89268e-05	8.77913e-06	-6.80215e-07	3.94237e-07	-5.97943e-05	2.00907e-05	-1.62056e-05	1.67056e-05	-6.2859e-06	1.75501e-05	6.19521e-06	-2.66005e-05	-9.98799e-06	-7.02222e-05	-3.20879e-06	2.26075e-05	-3.80288e-05	-7.4362e-05	-5.5361e-05	5.72444e-05	4.0218e-06	1.5738e-05	-3.99504e-06	3.95096e-05	-5.6684e-05	1.89699e-05	3.00046e-05	-0.000144822	-0.000420989	-0.000693809
573.176	0	2.59401e-06	-5.95149e-05	4.41626e-05	-2.63865e-05	-5.36865e-06	2.90436e-05	-5.29237e-06	7.20222e-06	4.27497e-05	-3.20532e-05	-3.56252e-05	-3.91972e-05	-2.84037e-05	4.55792e-05	-2.39091e-06	8.18535e-06	-1.89112e-05	-6.45491e-05	4.29476e-05	3.93444e-05	4.32371e-05	2.78959e-05	5.51318e-05	2.94012e-05	-1.63583e-05	1.66004e-05	-2.04256e-05	-8.07226e-05	5.12573e-06	-8.39891e-06	-4.91441e-06	-7.02707e-06	7.39761e-05	3.44991e-05	-5.56583e-05	-5.10941e-05	-1.41762e-05	-1.90845e-05	-5.33244e-05	-2.04638e-05	4.77346e-05	3.81429e-05	5.08567e-05	2.33162e-05	-2.91484e-05	-0.000100985	-0.000415448	-0.000673725
573.836	0	-7.29857e-05	1.98283e-05	-4.60013e-05	1.75839e-05	5.64111e-06	-1.26165e-05	2.01531e-05	3.32952e-05	-4.78239e-06	3.5628e-05	3.76757e-05	3.97234e-05	2.95479e-05	-2.08607e-05	-7.04434e-06	-6.5554e-05	-1.78597e-05	-5.04358e-05	-6.05601e-05	-1.75658e-05	-3.51237e-05	8.41126e-06	-6.00336e-05	-1.76435e-05	-1.48295e-05	-2.66342e-05	-1.84014e-05	3.9908e-05	-3.94968e-05	2.23635e-05	-6.16645e-05	2.27583e-05	2.51856e-06	-1.44003e-05	-1.94746e-05	-1.96865e-05	-4.4413e-05	-3.37184e-05	-4.09622e-05	-2.08082e-05	-4.11642e-05	-1.73009e-06	-4.73622e-05	-3.04023e-05	-7.00055e-05	-0.000136153	-0.000412017	-0.000687265
574.495	0	1.44283e-05	-1.92725e-05	6.36968e-05	-2.91486e-05	3.43072e-05	-2.99508e-05	-4.88733e-05	2.35108e-05	5.85128e-06	-2.70853e-05	-2.84159e-05	-2.97466e-05	-2.14867e-05	1.00895e-05	-4.04004e-06	3.90947e-06	-2.16417e-05	3.61392e-05	-1.57499e-05	-1.57822e-05	-2.01539e-05	7.41663e-05	6.45631e-05	-3.78024e-05	-3.99715e-05	7.1779e-05	1.01921e-05	-1.32e-05	-9.96436e-06	2.74893e-05	1.19285e-05	-2.93502e-05	3.17809e-05	2.49152e-05	2.92953e-05	4.12697e-05	7.78362e-05	4.42062e-05	-4.5704e-05	-2.54887e-05	4.02762e-06	-3.50476e-05	2.67314e-05	-4.11463e-05	-6.06138e-05	-0.000152499	-0.000418567	-0.000699896
575.155	0	5.02797e-05	-1.10927e-05	-4.01016e-05	-2.36535e-05	-2.42995e-05	1.34843e-05	-1.76221e-05	2.34174e-05	-7.74366e-07	-9.32326e-06	-9.54068e-06	-9.7581e-06	-2.68742e-05	-7.5543e-05	-4.11967e-05	-1.52435e-05	-2.71015e-05	3.54872e-05	-8.52175e-06	5.29114e-05	3.6133e-05	1.94014e-05	2.62343e-05	2.19913e-05	-2.6147e-06	-2.52043e-05	-1.6884e-05	-6.20431e-05	-1.50755e-05	-7.01165e-05	-5.23929e-05	-8.90468e-05	-0.000107949	1.08304e-06	2.94106e-05	7.45386e-06	4.35437e-05	-5.11611e-05	-6.74706e-05	-4.3859e-05	1.2712e-05	1.68354e-05	-2.46478e-05	-2.46434e-05	-3.74745e-05	-0.000151019	-0.000527228	-0.000720859
575.814	0	-1.18586e-05	6.48956e-06	-6.286e-05	-2.05308e-06	4.1677e-06	3.49637e-05	5.32932e-05	-2.06296e-05	-3.44425e-05	2.86701e-05	3.15298e-05	3.43896e-05	2.15969e-05	-1.76774e-05	-1.86625e-05	-6.42087e-05	-8.45782e-05	3.45871e-05	1.63836e-05	2.38574e-05	5.0797e-05	4.94355e-05	1.9404e-05	-1.23433e-05	-2.11857e-05	-8.57345e-06	-3.44823e-05	-4.83031e-06	9.30291e-05	-3.37913e-05	2.33916e-05	9.94608e-06	4.13412e-05	2.78826e-08	4.18042e-05	-2.9695e-05	3.68463e-05	6.54263e-05	9.79857e-06	1.7285e-05	3.06785e-05	3.16942e-05	7.40577e-06	3.5148e-05	-1.34799e-05	-0.000125066	-0.000316427	-0.000602963
576.474	0	-8.80516e-06	-3.56234e-05	-2.36658e-05	-1.76323e-05	-1.65777e-05	-5.43553e-05	3.93861e-05	-1.43453e-06	2.40881e-05	2.87864e-05	2.88232e-05	2.886e-05	2.08287e-05	-2.26929e-05	-7.27345e-05	-4.37046e-05	4.06011e-06	6.36949e-05	5.46521e-05	4.63715e-06	-4.78814e-05	3.33918e-05	6.07295e-05	-8.04004e-06	-1.3742e-05	-4.18688e-05	-1.37967e-05	-1.61025e-05	5.7277e-06	1.10347e-05	4.70711e-05	2.42587e-05	-2.53278e-05	1.99028e-05	2.21002e-05	-2.0083e-05	4.52878e-05	4.58098e-06	1.72646e-06	1.77955e-05	-3.01295e-06	-1.7256e-05	1.8022e-05	4.86822e-05	1.64135e-06	-8.74624e-05	-0.000326908	-0.00060591
577.133	0	-4.59072e-05	3.1088e-05	-2.11669e-05	5.79225e-07	-1.16048e-05	2.81242e-05	5.07567e-05	-2.21255e-06	2.73251e-05	-4.28641e-05	-4.62029e-05	-4.95416e-05	-3.96018e-05	1.04931e-05	2.40597e-05	-5.48235e-05	-3.31681e-05	2.46688e-05	3.06724e-05	-3.37785e-05	-2.63578e-05	2.04648e-05	1.38605e-05	5.38415e-06	-3.26439e-05	-5.80219e-05	1.17141e-05	1.56403e-05	4.76285e-06	1.33866e-05	1.48999e-05	3.12791e-05	7.33343e-06	6.78924e-06	-3.14238e-05	-4.23135e-06	2.19571e-05	-2.15197e-05	-2.60405e-05	7.91545e-06	-1.18055e-05	9.84032e-06	1.86596e-05	-3.31196e-06	-1.31917e-05	-0.000172139	-0.000415558	-0.000565017
577.793	0	-3.32231e-05	-2.63613e-05	-1.64595e-05	3.97786e-05	3.29536e-05	2.01082e-05	2.74535e-05	-2.92726e-05	2.26385e-05	-1.70504e-05	-1.91376e-05	-2.12248e-05	-2.98311e-05	-2.1861e-06	4.65338e-05	-1.69662e-05	-6.75258e-06	3.2384e-05	-2.66699e-05	-4.80737e-05	1.24326e-05	9.55668e-05	2.1424e-05	-5.1131e-05	-4.64426e-05	-5.68638e-06	-4.89507e-05	-1.52264e-05	2.14031e-05	-6.09615e-06	-1.20527e-05	4.34986e-06	-1.83651e-05	1.89466e-05	4.18667e-05	4.94118e-05	1.57036e-05	-9.90142e-06	-1.1226e-05	-6.05091e-06	4.45779e-05	3.74596e-05	3.5362e-05	9.30101e-06	-8.49246e-07	-3.24627e-05	-0.000337927	-0.000556275
578.453	0	-7.60244e-06	3.40471e-05	-9.7916e-07	8.11266e-07	-9.45867e-06	-1.92047e-05	5.70573e-05	-4.71368e-05	1.4816e-05	2.15042e-05	2.14097e-05	2.13152e-05	1.12755e-05	2.6611e-05	7.34252e-05	2.98775e-05	-7.39316e-06	3.6195e-05	1.57494e-05	-3.86676e-05	-1.29771e-05	4.34415e-05	4.2124e-05	-3.54297e-05	-2.69919e-05	2.01964e-05	1.66397e-05	1.19797e-05	-3.60892e-06	1.92512e-05	-7.04177e-06	3.90853e-05	3.79142e-05	4.69858e-05	-9.61174e-06	-3.59314e-05	-2.71286e-05	-2.22735e-05	7.38841e-06	2.19991e-05	3.56568e-05	2.3392e-05	7.47635e-05	5.99295e-05	-4.42092e-06	-0.000114249	-0.000400864	-0.000608619
579.113	0	9.84886e-06	-6.2127e-05	-1.86137e-05	3.05885e-05	-2.12652e-05	1.36742e-05	8.34211e-06	-5.80132e-05	5.80275e-05	6.55029e-06	3.61563e-06	6.80975e-07	8.26334e-06	-5.4512e-06	-3.01974e-05	5.91399e-06	-2.31373e-05	-7.45117e-05	1.28426e-05	4.52133e-05	-2.93876e-05	-3.5292e-07	3.43491e-05	-7.94251e-06	-3.08012e-05	-2.71542e-05	-3.45479e-05	-4.1971e-05	-6.84611e-07	1.40101e-05	1.66841e-05	-3.37114e-05	-7.43071e-05	-3.45417e-05	-4.27208e-05	-5.67878e-05	6.30982e-06	-9.84475e-07	-9.61442e-06	-4.01531e-05	-2.23748e-05	1.78478e-05	-1.99132e-05	-5.04541e-05	-6.5155e-05	-0.00016372	-0.000379645	-0.000555128
579.773	0	-6.97505e-06	2.70078e-05	1.73668e-05	2.2036e-05	-4.71761e-05	-3.42667e-05	-2.10936e-05	-2.95399e-05	4.62834e-05	1.37116e-05	1.18686e-05	1.00255e-05	1.81555e-05	2.04825e-05	-2.10635e-05	-2.58676e-05	2.05565e-05	7.98424e-06	6.3255e-06	1.2669e-05	-2.72287e-05	-3.16804e-05	2.55931e-06	5.45553e-05	2.72497e-05	-2.19691e-05	1.28313e-05	1.38274e-05	2.93127e-05	-3.90933e-06	-2.88524e-05	1.22306e-05	1.86352e-05	1.04721e-05	-2.04137e-07	1.65829e-05	3.80789e-05	7.99801e-06	-8.67998e-06	-1.70628e-05	-4.68301e-06	5.82148e-07	-2.26988e-05	-1.28594e-05	1.66965e-05	-8.72182e-05	-0.000323604	-0.000542219
580.433	0	3.25744e-05	1.61275e-05	3.61389e-05	-4.11349e-05	-2.56954e-07	-0.000105623	2.71054e-05	-2.63177e-05	4.47037e-05	6.90016e-05	6.96873e-05	7.03729e-05	2.84259e-05	-9.07997e-06	3.18378e-05	4.86175e-05	1.88482e-05	2.58642e-05	1.6276e-05	5.57351e-05	5.63514e-05	-1.57211e-05	5.99974e-05	9.43449e-05	1.50498e-05	-4.55709e-06	2.72962e-05	3.64034e-05	9.41771e-05	5.334e-05	3.0311e-05	7.98246e-05	1.7227e-05	1.78899e-05	0.00010876	8.01854e-05	-1.47949e-06	-5.17315e-06	5.51986e-05	6.38807e-05	4.43158e-05	4.48322e-06	-3.33421e-05	1.45918e-05	5.3937e-05	-7.35117e-05	-0.000316491	-0.000483992
581.093	0	0.000113035	5.61179e-05	-2.21452e-05	3.92802e-05	-3.25986e-05	-1.49178e-05	-2.87237e-05	-5.71704e-05	-6.50025e-05	-8.14618e-05	-8.21693e-05	-8.28768e-05	-1.14338e-06	3.7411e-05	1.86566e-05	1.08382e-05	-1.49356e-05	1.91473e-06	-1.02487e-05	9.88464e-07	-4.73663e-06	-4.26591e-05	-1.11045e-05	-3.36987e-05	-7.19424e-05	-1.73661e-05	-6.09204e-06	-1.05862e-05	1.17824e-06	-4.13289e-05	-4.57284e-05	-4.65106e-06	-1.55067e-05	-7.9891e-06	1.94852e-05	1.59667e-05	-8.55471e-06	-1.81279e-05	-1.96348e-05	-2.79729e-05	-1.37709e-05	-1.2553e-05	-5.29969e-05	-8.33446e-05	-4.36555e-05	-0.000124123	-0.000445771	-0.000679388
581.753	0	-3.97865e-05	-2.75634e-06	3.23927e-06	2.59014e-05	-2.02725e-05	2.5664e-05	-8.31862e-06	-2.21708e-05	-1.15375e-05	-9.92328e-06	-9.90859e-06	-9.8939e-06	5.00513e-06	5.93014e-05	6.76148e-05	1.66848e-05	-1.1325e-06	-6.09143e-06	2.40363e-05	4.62619e-05	1.95208e-05	-2.94549e-05	3.83664e-05	3.47716e-05	-4.11543e-06	6.69045e-05	3.59738e-05	-1.78371e-05	-9.72715e-06	-1.0988e-05	2.85975e-05	2.83406e-05	9.5401e-06	-2.6431e-06	1.22957e-05	1.37205e-05	-7.04117e-05	-6.24898e-05	2.9816e-05	3.28085e-05	3.54987e-06	-1.31224e-05	9.61248e-06	3.54956e-05	1.80888e-05	-0.000116548	-0.000346222	-0.000599133
582.413	0	3.40991e-06	1.40026e-05	-1.85217e-05	-1.13885e-05	-6.74622e-05	2.8513e-05	7.11043e-05	-8.77563e-06	-2.96437e-05	-1.29536e-05	-1.21566e-05	-1.13596e-05	1.53945e-05	1.7458e-05	5.80852e-06	5.50222e-05	5.51523e-05	7.64733e-05	7.6528e-05	2.84116e-05	6.86457e-05	0.000108786	6.30903e-05	-1.83722e-05	1.38611e-05	4.94905e-05	7.00112e-06	7.4035e-06	9.42883e-07	-4.31459e-05	-2.22605e-05	6.62172e-05	7.76908e-05	4.69438e-05	2.52472e-05	-1.0002e-05	-4.47776e-05	1.65974e-05	1.2608e-05	1.03428e-05	4.52371e-05	-1.56585e-05	-1.83782e-05	-2.50224e-05	-9.67268e-05	-0.000177542	-0.000359768	-0.000557286
583.073	0	3.84327e-05	1.88511e-05	-4.14983e-05	2.99989e-05	2.80447e-05	-4.93304e-05	1.86167e-05	8.55924e-05	-6.42865e-05	9.33849e-06	1.33398e-05	1.7341e-05	3.16019e-05	2.54368e-05	3.89904e-05	4.17533e-05	2.41653e-05	5.22949e-05	8.69881e-06	2.51445e-05	3.30017e-05	1.06481e-05	1.21211e-05	3.856e-05	2.62667e-05	-8.74702e-06	-7.66864e-06	1.97004e-05	2.44603e-05	1.32587e-05	4.07953e-06	7.71732e-05	5.00021e-05	4.45736e-06	3.04808e-05	3.03529e-06	-1.29968e-05	-2.99059e-05	-1.66183e-05	2.30627e-05	9.40268e-05	5.02348e-06	2.29021e-05	7.95689e-05	2.48622e-06	-0.000104367	-0.000332482	-0.000611336
583.734	0	-5.15532e-05	1.21232e-05	-4.48143e-05	6.42015e-05	3.52074e-05	1.62451e-05	6.79476e-05	-3.727e-05	-7.11603e-06	2.53008e-05	2.65388e-05	2.77767e-05	-2.24939e-05	2.08834e-05	3.76851e-06	-4.43924e-06	8.84429e-07	-1.42688e-05	1.4364e-05	1.88389e-05	-7.16749e-06	6.31692e-05	6.505e-05	6.42206e-06	-2.09969e-05	3.11679e-05	-3.78043e-06	-2.86632e-05	3.07704e-05	1.71135e-05	2.07756e-05	5.18076e-05	3.35608e-05	2.6803e-05	-1.34811e-05	-3.35556e-06	3.11393e-05	8.19e-05	9.84002e-05	8.37615e-06	1.52506e-05	1.02979e-05	1.32535e-05	2.30936e-05	3.06056e-05	-7.60725e-05	-0.000372233	-0.000567168
584.394	0	-8.26116e-05	9.65871e-06	-5.97103e-05	-2.80737e-05	8.64032e-06	7.81671e-06	9.99635e-05	2.36004e-05	2.81059e-05	-5.96455e-05	-6.3584e-05	-6.75224e-05	-8.5777e-05	-4.40268e-05	1.56318e-06	3.09325e-05	-3.12382e-05	-3.75253e-05	-7.63393e-06	2.35267e-06	2.62937e-05	-1.29387e-05	-1.72406e-06	-7.0312e-06	-1.62145e-05	-5.0953e-05	3.59908e-06	5.49929e-05	1.18136e-05	-4.76652e-05	-1.21847e-05	4.27646e-05	1.66362e-05	4.25919e-06	-2.08474e-05	-2.29987e-05	-6.87987e-05	-6.52063e-06	-1.83621e-05	-3.158e-05	-5.60421e-05	-5.34948e-05	-6.58474e-05	-1.31785e-05	1.69053e-05	-0.000137401	-0.000335491	-0.000563608
585.054	0	-1.10431e-05	4.77006e-05	1.09759e-05	-4.81031e-05	-5.80768e-05	-6.57869e-06	7.72234e-05	1.80918e-05	5.24761e-06	-2.01185e-05	-2.12107e-05	-2.23029e-05	1.70267e-06	-3.58544e-05	-9.97056e-07	-2.49652e-05	-3.47108e-05	-6.79022e-05	-3.67145e-05	2.75033e-05	5.18597e-05	7.36352e-06	6.17869e-06	2.39032e-05	4.81292e-06	-4.5499e-05	-1.86825e-05	1.55667e-06	-3.93557e-05	-6.84403e-05	-9.41888e-06	5.68752e-05	-3.19823e-05	-3.81804e-05	-6.85976e-05	-4.10891e-05	-5.51137e-05	-3.28935e-05	-6.56068e-06	2.56601e-05	7.53543e-05	7.09504e-06	-1.36741e-05	1.1403e-05	4.76206e-05	-0.000135125	-0.000388776	-0.00056688
585.715	0	-2.25971e-05	-1.30485e-05	5.76508e-05	3.24055e-05	4.83021e-05	-1.05008e-05	5.07284e-06	-4.04375e-05	-6.56391e-05	2.90506e-06	6.01659e-06	9.12813e-06	8.4986e-07	4.15877e-05	-5.46655e-06	-8.14033e-05	-7.6905e-06	-1.33391e-06	-1.21575e-05	-1.63173e-05	3.83745e-05	-2.00367e-05	-5.5638e-05	-2.50671e-05	-3.53891e-05	2.45051e-05	3.72741e-05	1.41555e-05	-4.70015e-05	-6.43735e-05	-2.47055e-05	-1.23993e-05	-8.86998e-05	-5.82452e-05	-5.32119e-05	-2.48898e-06	-3.55447e-05	-7.59893e-06	-4.75461e-05	-1.67206e-05	3.0309e-05	-6.05624e-06	-1.62428e-05	-7.11147e-05	-4.76059e-05	-0.000171508	-0.000414488	-0.000673161
586.375	0	-1.76019e-05	-5.85891e-06	-8.36405e-05	-3.69907e-06	2.81423e-05	-2.03335e-05	1.40845e-05	2.90044e-05	1.17696e-05	-3.94163e-05	-4.15881e-05	-4.376e-05	-1.44563e-05	8.72349e-07	2.40113e-05	-1.10961e-06	1.3143e-05	4.94355e-05	-1.76723e-05	-4.1899e-05	6.41638e-05	-2.56719e-05	-5.86812e-05	-2.65507e-05	3.51655e-06	-5.48328e-05	-3.90284e-05	-2.59143e-05	7.08369e-05	1.29558e-05	4.51408e-06	-3.07679e-06	-6.80294e-06	3.59682e-05	2.35442e-05	3.01213e-05	6.60423e-06	-5.41592e-05	-4.62887e-05	-2.27679e-05	-2.70566e-05	-6.14096e-05	-3.61656e-05	-3.11528e-05	-5.02882e-05	-0.000106627	-0.00032915	-0.000531354
587.036	0	2.48922e-05	-5.03198e-05	1.60385e-05	-4.15721e-05	-5.14155e-06	8.73291e-05	-4.41445e-05	-2.31862e-05	5.61816e-06	9.9106e-05	0.000103105	0.000107104	4.72649e-05	4.17212e-05	2.46384e-05	1.6187e-06	2.07521e-05	1.35238e-06	1.53653e-05	3.9126e-05	3.41909e-05	3.66051e-05	4.58883e-05	-0.00010357	-1.97315e-05	1.38425e-05	-2.92197e-06	-2.11955e-05	1.3325e-05	7.28308e-05	6.58403e-05	-3.90856e-05	-6.95568e-05	-4.87407e-05	-1.22485e-05	-2.0407e-05	1.56606e-05	3.50248e-05	1.9454e-05	-2.25637e-05	2.1302e-05	-3.26885e-06	1.58995e-06	-8.02238e-06	1.01202e-05	-7.62518e-05	-0.000290448	-0.000491701
587.697	0	1.24885e-05	-6.61732e-05	-9.42681e-06	2.44911e-05	-4.69659e-07	6.05136e-05	-2.26191e-05	-8.223e-06	-3.61872e-05	3.76538e-05	4.10252e-05	4.43966e-05	2.09667e-05	2.69254e-05	2.66111e-05	1.26734e-05	-1.25887e-05	3.09548e-05	1.0766e-05	-1.16848e-05	5.35255e-05	1.06426e-05	-3.41723e-05	-9.47941e-08	-5.74368e-05	-8.30925e-06	-1.8638e-05	-7.46882e-05	-4.32237e-05	1.88916e-05	5.21196e-05	1.5213e-05	-4.37569e-05	6.77431e-06	4.59387e-05	1.37533e-05	-5.1124e-06	8.2798e-05	2.5447e-05	-3.35774e-05	-4.78562e-05	-1.26595e-05	1.64368e-05	1.74734e-05	3.36978e-05	-3.99427e-05	-0.000303575	-0.000541907
588.358	0	9.26815e-05	2.71893e-05	-5.58472e-05	3.69287e-06	-2.60412e-05	-2.79058e-05	1.53028e-05	-5.57575e-05	1.40546e-05	-1.62482e-06	-2.63765e-06	-3.65048e-06	6.94457e-06	-2.89958e-05	1.64554e-06	-2.10741e-06	3.37008e-05	-1.45433e-05	4.27244e-05	7.6659e-05	7.03932e-05	2.15368e-05	6.09817e-05	-8.22332e-05	-8.62906e-06	-2.20371e-05	-2.85233e-05	1.43819e-06	1.1471e-05	-4.82094e-05	1.10664e-05	3.21836e-06	-2.22357e-05	3.77382e-06	-1.3638e-05	-6.79403e-05	4.94906e-05	7.75389e-05	-1.28188e-05	-1.36238e-05	3.78439e-05	2.29793e-05	2.9733e-05	-0.000105276	-6.50621e-05	-0.000225083	-0.000429121	-0.000548646
589.018	0	-8.05824e-06	-1.15067e-05	-3.95629e-05	3.2687e-05	9.5848e-05	-3.72416e-05	1.12266e-05	-1.48204e-05	-5.00017e-05	-7.32532e-06	-5.32246e-06	-3.3196e-06	4.93641e-05	-3.38605e-05	-3.66571e-05	-5.48073e-05	-2.04863e-05	5.4974e-05	8.8973e-05	-1.60846e-05	3.40953e-05	2.69316e-05	-4.23542e-05	-7.72645e-06	4.07822e-06	-6.34344e-05	-9.38162e-05	-5.65339e-05	-5.84032e-05	-0.000106517	-3.47121e-05	-7.71129e-05	-2.2057e-05	-4.12783e-05	-5.90455e-06	-6.28018e-05	1.22403e-05	4.09203e-05	-1.98029e-05	-2.14442e-05	-1.60504e-06	3.2775e-06	3.25084e-05	7.75843e-05	-4.26309e-06	-0.000113562	-0.000349434	-0.00057377
589.679	0	1.17115e-05	2.35161e-05	2.61592e-06	2.88001e-05	-4.0783e-05	-3.46164e-05	2.44889e-05	-4.66851e-06	-9.36417e-06	-8.06333e-06	-8.00045e-06	-7.93757e-06	-1.25328e-05	-8.64132e-05	-1.472e-05	-8.52718e-06	0.000122407	1.52051e-06	-7.87022e-06	7.14822e-05	8.73676e-05	2.34067e-05	3.82333e-05	6.47317e-05	1.30147e-05	-9.225e-05	-1.08216e-05	6.50289e-06	3.24341e-05	-0.000100749	5.66984e-05	-3.32353e-05	-3.69841e-06	-7.96265e-05	-3.20108e-05	3.37924e-05	-1.80015e-05	-3.22209e-06	1.92682e-05	3.57677e-05	3.38778e-05	1.06682e-05	-4.51365e-05	2.86095e-05	4.91695e-05	-9.05433e-05	-0.000321108	-0.000572776
590.34	0	-7.32491e-05	1.80117e-05	3.84846e-06	-1.452e-05	2.52374e-05	-4.94957e-05	6.3218e-05	-3.62191e-05	5.51741e-05	-1.48692e-06	-4.37256e-06	-7.2582e-06	-6.55258e-05	-2.40294e-05	3.39656e-05	-7.33285e-05	-7.75579e-06	3.5352e-05	-1.50221e-05	2.58154e-05	0.000134767	-5.27996e-06	-6.42333e-05	7.81109e-06	2.19725e-08	5.01131e-05	-8.05948e-05	-3.58372e-05	-3.13092e-08	-7.32792e-05	-1.99636e-05	1.58871e-05	-5.06612e-05	-3.0667e-05	-7.89258e-07	-9.82917e-05	-4.43735e-05	8.50904e-06	-3.67771e-05	3.61147e-05	2.17335e-05	3.70803e-06	-2.40556e-05	9.59229e-07	1.21351e-05	-5.17317e-05	-0.000325673	-0.000472969
591.001	0	-1.80652e-05	-6.59556e-05	-1.15836e-05	3.42675e-05	6.26052e-06	0.00010649	2.84792e-05	-5.06326e-05	-3.17796e-06	-5.21873e-05	-5.45405e-05	-5.68937e-05	2.71545e-06	-9.21583e-05	-3.30806e-05	4.50885e-06	-7.16356e-05	-8.07594e-05	-3.37389e-05	7.59392e-06	1.74546e-05	-1.16859e-05	-4.68783e-05	-6.87711e-06	-5.34155e-05	-4.84162e-05	-3.55732e-06	2.19549e-05	-5.34848e-05	1.1895e-05	-6.07223e-05	9.1026e-06	-7.88562e-05	-7.37561e-05	-6.65607e-06	4.53104e-05	-9.4593e-07	-5.34844e-05	-9.36688e-06	-4.63278e-05	-2.14735e-05	-6.47157e-05	-3.78266e-05	-1.57067e-06	1.08161e-05	-0.000117046	-0.000440487	-0.000577815
591.662	0	-3.11572e-06	1.57363e-05	3.10851e-05	-1.29878e-05	-4.59403e-06	1.9495e-05	7.15936e-05	-3.78898e-05	-8.62635e-07	-3.07671e-05	-3.22555e-05	-3.3744e-05	1.13985e-05	1.1324e-05	-5.72813e-05	1.20717e-05	-1.39411e-05	-3.54363e-05	2.60847e-05	-6.57762e-06	2.05329e-05	-1.80135e-05	3.3316e-05	-5.27816e-05	3.37789e-05	-5.65724e-05	-3.2769e-05	-6.01538e-05	-0.000117064	-9.11783e-05	-2.64292e-05	-4.01052e-05	-3.18844e-05	-5.16988e-05	-9.61025e-05	3.40809e-05	1.4944e-05	2.99761e-05	4.41481e-05	-5.21505e-05	-5.08407e-05	-9.68797e-05	-3.66048e-05	-5.26817e-06	-6.29466e-05	-8.26244e-05	-0.000293591	-0.00059497
592.323	0	3.22432e-05	5.41586e-05	-2.17213e-05	-4.34325e-05	8.38502e-05	1.15213e-05	2.05243e-05	-0.000165366	-3.47016e-05	-4.4179e-05	-4.51589e-05	-4.61388e-05	-9.96569e-05	4.42115e-05	6.484e-05	-4.80741e-05	-4.1663e-05	-8.31742e-05	3.31306e-05	-2.56184e-05	-0.000104172	-5.01303e-05	-1.55093e-05	-7.53745e-05	-2.82694e-05	-0.000121275	-5.98699e-05	1.84319e-05	-2.99855e-05	-8.64901e-06	1.24353e-05	-6.40922e-05	5.26412e-06	-5.88665e-05	-1.63391e-05	-6.4009e-05	-1.48998e-05	-5.40678e-05	4.44327e-05	-8.97158e-06	-5.45859e-05	-3.18169e-05	-9.28487e-06	2.203e-05	-8.70099e-05	-0.000143444	-0.000434933	-0.000553845
592.985	0	-1.83455e-05	-1.53684e-05	1.62524e-05	3.13803e-05	4.39934e-05	7.3259e-05	-8.00798e-06	-0.000103455	-1.17719e-05	1.74858e-05	1.83813e-05	1.92768e-05	-3.5698e-05	-6.55419e-05	4.74287e-06	2.4227e-05	-7.27279e-05	1.90361e-05	4.43397e-05	2.61967e-06	1.97216e-05	-8.38844e-05	-6.31294e-06	7.36532e-05	9.50432e-05	5.8185e-06	5.4653e-07	-5.85689e-05	-7.59981e-05	9.66937e-07	4.69157e-05	-2.39347e-05	6.44709e-05	1.67207e-05	2.35939e-05	7.18919e-06	-4.67256e-06	5.30105e-05	-2.76945e-05	-2.80276e-05	-2.1982e-05	-1.74204e-06	-3.18778e-05	4.44078e-05	2.15324e-05	-7.94569e-05	-0.000350675	-0.000655338
593.646	0	-2.53103e-05	1.8563e-05	6.95464e-05	-8.53067e-06	2.52538e-05	1.74967e-05	-2.59732e-05	-5.02902e-05	-5.69447e-06	6.5679e-05	6.86062e-05	6.86525e-05	-5.93243e-05	-1.33708e-05	2.88392e-05	-8.48245e-06	-1.47574e-05	0.000110294	5.12168e-05	-6.96037e-06	4.22335e-05	-5.58523e-05	2.84909e-06	1.24937e-05	8.62114e-06	2.41539e-05	6.66491e-05	-6.41235e-05	-3.85806e-05	2.0947e-05	0.000116245	9.28535e-05	8.67027e-05	2.18376e-05	6.41063e-06	-7.54332e-05	-1.47404e-05	-2.22701e-06	-5.25006e-05	6.91422e-05	2.04623e-05	0.000115171	6.76812e-05	3.65068e-05	1.75577e-05	-3.10163e-05	-0.00039734	-0.000737434
594.307	0	-7.48351e-05	8.10664e-05	2.49094e-05	1.07975e-05	1.83082e-06	-2.28654e-05	7.16513e-05	4.57145e-05	-9.66502e-05	-3.57294e-05	-3.25737e-05	-2.57837e-05	4.75031e-05	1.4998e-05	5.15806e-05	1.9623e-05	9.14938e-05	-2.38207e-05	-4.83119e-07	8.61175e-05	1.12681e-05	2.86685e-06	-9.22584e-05	-1.39307e-05	-7.82283e-05	-2.42158e-05	-7.38422e-05	-4.20113e-05	-4.87705e-05	-3.56703e-05	-1.66162e-05	-3.21394e-05	-1.61253e-05	-3.14126e-05	0.000101637	2.1065e-05	0.000122899	4.41735e-05	-1.91439e-05	-2.87365e-06	2.52993e-05	2.15659e-05	-3.35965e-05	-1.26563e-05	-5.80047e-05	-0.000107658	-0.000351594	-0.000782097
594.969	0	-1.24686e-05	1.87748e-05	3.83534e-05	3.27979e-05	-3.05339e-05	-0.000150098	7.95391e-05	3.46877e-05	-1.20992e-07	1.2565e-05	1.32211e-05	8.94835e-06	-4.62176e-05	1.81994e-05	-1.28483e-05	-5.07668e-05	-8.89966e-05	7.58699e-07	5.33469e-05	1.69737e-05	5.84839e-05	6.37179e-05	3.43576e-05	-2.43439e-05	-2.5148e-05	5.21313e-05	-2.14571e-05	2.94416e-05	-4.37477e-05	2.62683e-05	4.77808e-05	-5.90365e-05	-6.65465e-05	-9.5826e-06	2.46741e-05	-2.40613e-05	4.69897e-05	1.19947e-05	-3.75757e-05	6.1639e-05	2.08263e-05	3.46606e-05	9.43333e-05	6.31665e-05	-1.12968e-05	-0.000106223	-0.000371006	-0.000835439
595.63	0	2.2346e-06	4.50889e-06	-5.1481e-05	5.60259e-06	8.74966e-05	-5.14596e-05	-3.56491e-05	3.12425e-05	3.79922e-05	6.90771e-05	7.04176e-05	5.57336e-05	-6.742e-05	7.97101e-05	-5.04821e-05	-3.36655e-05	2.59326e-06	-1.48464e-05	-6.06934e-05	4.55271e-05	0.000124732	-9.86307e-05	-6.22011e-05	1.34915e-05	0.000102049	5.5297e-05	4.48371e-05	1.1559e-05	-7.61703e-06	1.50953e-05	2.52605e-05	-3.59699e-05	1.43909e-05	6.02319e-06	0.000108791	-1.44913e-06	-1.00647e-06	-5.7655e-06	-1.40646e-05	2.37491e-05	-8.01295e-07	-3.74603e-05	-6.41075e-05	-1.30606e-05	1.20264e-05	-0.000132067	-0.000439247	-0.0011
596.292	0	7.85729e-05	-3.44777e-05	6.42066e-05	4.13051e-05	-9.9669e-05	-3.66438e-05	-5.54364e-06	1.96793e-05	-1.49878e-05	2.95512e-05	3.1605e-05	3.42377e-05	4.57592e-05	8.35636e-05	7.7753e-05	0.000112266	7.27129e-05	-5.70593e-07	1.46746e-05	3.66696e-05	-1.00322e-06	-0.000109077	-1.7654e-05	2.85387e-05	7.49601e-05	6.05287e-05	5.9837e-05	5.95744e-05	5.02895e-05	-4.05246e-05	0.000100203	7.67753e-05	9.65636e-05	6.22877e-05	3.90195e-05	4.02241e-05	5.09673e-05	5.78639e-05	3.12453e-05	7.12561e-08	-4.05487e-06	5.31589e-05	2.03031e-05	3.96811e-06	3.79053e-06	-6.6552e-05	-0.000354482	-0.00135
596.953	0	3.66835e-06	-9.28059e-05	6.77518e-06	8.83842e-06	4.76459e-05	-3.96642e-05	2.99002e-05	-4.71557e-05	6.29138e-05	1.87801e-05	1.64721e-05	2.71865e-06	-4.99494e-05	2.11595e-05	2.96176e-05	-2.57113e-05	-3.72114e-05	2.30372e-05	9.59224e-05	-5.72443e-05	4.08222e-05	-0.000118163	-1.30221e-06	-6.18146e-05	-6.93559e-05	-2.28936e-05	-7.54407e-06	4.22795e-05	-9.59768e-05	-5.85587e-05	1.76231e-05	-2.16662e-05	3.005e-05	-8.1767e-05	3.49841e-05	-2.89833e-05	-7.84793e-05	-1.57483e-05	-5.23909e-05	-1.21072e-05	-9.62358e-05	-5.96737e-05	-5.13752e-05	5.4302e-06	3.96261e-05	-8.55408e-05	-0.000456435	-0.00146
597.615	0	-2.07393e-05	4.9903e-05	1.78878e-05	6.97176e-05	2.76637e-05	-8.02297e-05	-7.01681e-05	-9.70114e-06	-5.1585e-05	-2.96262e-05	-2.85213e-05	-1.03831e-05	4.83806e-05	-1.24047e-05	0.000117579	9.04302e-05	6.25763e-05	7.05647e-06	-1.95928e-06	4.88869e-05	9.2506e-05	7.11561e-05	-8.49628e-06	-4.94433e-05	-4.59202e-05	5.27481e-05	0.000113042	2.56527e-05	3.15907e-05	4.3717e-05	2.2062e-05	5.77922e-05	7.19237e-05	5.8913e-05	3.41121e-05	-1.6416e-05	5.78088e-05	7.09447e-05	3.76972e-05	-5.66697e-06	4.96782e-05	-2.13384e-05	1.21052e-05	7.60973e-05	1.80578e-05	-9.71191e-05	-0.00054757	-0.00161
598.276	0	2.6889e-05	-5.40916e-05	4.58703e-05	-3.05341e-05	-7.30284e-05	6.60803e-06	6.83827e-05	2.10963e-05	-7.57988e-06	6.5318e-05	6.85416e-05	5.0577e-05	-1.84555e-05	2.01969e-05	7.58073e-06	-2.78376e-05	2.0496e-06	5.7892e-06	2.73165e-06	-1.00655e-05	-1.7013e-06	-1.09863e-05	-6.22166e-05	-4.66465e-06	2.35144e-05	1.63642e-05	1.6799e-05	-6.33856e-05	-3.38213e-06	-4.20072e-05	-3.07641e-05	-2.37992e-05	6.11903e-05	1.64421e-05	6.09255e-05	3.41886e-05	3.24626e-05	3.48824e-05	8.44098e-06	-4.13327e-05	-6.20326e-05	-6.81429e-05	1.89629e-05	2.41269e-05	2.87051e-05	-0.000139584	-0.000486277	-0.00187
598.938	0	-5.7454e-05	-3.2124e-05	3.87833e-06	8.56e-05	4.95993e-05	-6.21376e-05	-9.00259e-06	2.11073e-05	1.36849e-05	-4.90937e-05	-5.17653e-05	-4.26941e-05	-4.12624e-07	3.37692e-06	-3.54348e-05	-1.7858e-05	-6.38463e-05	-7.83629e-05	6.5692e-06	-6.91686e-06	6.50876e-05	-6.05025e-05	4.61816e-06	-2.34357e-05	-1.92314e-05	5.95724e-06	-5.43079e-05	7.18772e-06	2.34015e-05	-3.22866e-05	-1.83765e-05	-3.07157e-05	8.10587e-06	1.12006e-05	-1.20254e-05	-6.40394e-05	1.64892e-06	5.75674e-05	-6.01359e-05	-1.62425e-05	-7.52459e-05	-7.03244e-05	-5.66524e-05	-4.52945e-05	-0.000111162	-0.000122993	-0.000653272	-0.00211
599.6	0	-1.18038e-06	9.18894e-05	-3.30556e-05	-4.7409e-06	9.62274e-05	-5.51719e-05	-8.70423e-07	-6.87072e-05	7.7457e-06	3.97468e-06	3.54873e-06	-1.20453e-05	-5.98254e-05	-5.77237e-05	-2.09412e-05	-4.09561e-05	-7.69432e-05	-1.5024e-05	-8.30192e-06	-5.67447e-05	8.47181e-05	-5.88478e-07	1.65197e-05	-7.07159e-05	-5.62113e-05	-0.000106681	-5.49919e-05	-2.34759e-05	-7.38315e-05	-2.08648e-05	-2.17587e-05	-2.00598e-05	-6.69714e-05	-2.4376e-05	-2.17807e-05	-3.19525e-05	-4.00317e-05	-1.90275e-05	-3.25739e-05	-0.000108807	-9.40145e-05	-5.94309e-05	-5.52971e-05	-4.7564e-05	-5.49919e-05	-0.000160047	-0.000766705	-0.00235
600.262	0	5.25809e-05	4.18998e-05	2.76431e-05	2.59347e-05	-8.94012e-05	-4.97914e-05	5.78631e-05	-2.32089e-05	-1.34515e-05	2.55215e-05	2.71438e-05	1.20187e-05	-2.97993e-05	-3.38613e-05	-3.5747e-06	8.46845e-05	4.88133e-05	-7.99823e-06	4.23042e-05	8.46424e-05	4.22757e-05	1.19893e-05	4.20735e-05	4.22285e-05	1.72793e-06	2.13278e-05	7.78829e-05	2.03412e-05	8.03079e-06	-1.27884e-06	2.62968e-05	-4.07256e-05	-6.90748e-05	-2.2554e-05	-3.03205e-05	1.18455e-05	-3.27401e-05	-7.31058e-06	-6.59244e-06	-4.01172e-06	-5.82942e-05	-2.06128e-05	-4.56905e-06	-1.10174e-05	-1.18653e-05	-0.000114144	-0.000821136	-0.00254
600.924	0	-4.25625e-05	5.77085e-05	6.36336e-05	-6.17313e-06	-6.62695e-05	5.28287e-05	1.46395e-05	-5.80757e-06	-3.13496e-05	-1.5221e-05	-1.44534e-05	1.09705e-06	3.8991e-05	3.2435e-05	-3.18166e-05	-7.09721e-05	-1.71174e-05	-6.18221e-06	-6.58183e-06	-2.30299e-05	1.66781e-05	2.99087e-05	3.44141e-05	3.08924e-06	5.22406e-06	-4.33694e-05	-2.11926e-05	-6.58119e-05	-1.21801e-05	-4.87017e-05	-4.99896e-06	-3.63198e-05	-5.45853e-05	3.42663e-05	-3.74725e-05	-7.44339e-05	-2.79422e-05	1.73626e-06	-5.47839e-06	-1.03022e-05	-1.77437e-05	2.17275e-05	1.30096e-05	-3.7787e-05	-7.8836e-05	-0.000151748	-0.000835445	-0.00264
601.586	0	7.13541e-06	-3.87524e-05	5.84921e-06	-1.82145e-05	4.02173e-06	-1.70297e-05	4.21655e-05	-1.93048e-05	1.78443e-05	3.67176e-06	2.93645e-06	5.3483e-06	1.66994e-05	1.90029e-05	1.90709e-05	6.11132e-05	3.79963e-05	-9.61227e-06	2.52997e-05	-1.53035e-05	-1.27692e-05	1.11574e-05	1.35255e-05	6.54741e-06	1.93082e-06	-5.2654e-06	-5.07601e-05	3.13257e-05	7.71768e-05	3.4593e-05	2.13511e-05	7.29935e-07	-1.39151e-05	-1.86158e-05	-7.16673e-05	-1.28279e-05	-2.33431e-06	5.84036e-06	-3.34486e-06	-8.84355e-06	2.23381e-05	-2.07006e-05	7.09929e-06	-3.90287e-05	-5.68075e-05	-0.000130903	-0.000887491	-0.00285
602.248	0	-0.000128581	2.42474e-05	5.49406e-06	3.70246e-05	2.2253e-05	2.80216e-05	-5.36188e-05	2.07257e-05	5.64971e-05	-4.67796e-05	-5.12912e-05	-4.70827e-05	-1.38602e-05	6.54768e-06	-1.03099e-05	-5.4158e-06	1.40898e-05	5.84883e-05	-1.47892e-05	-1.20694e-05	-1.06588e-05	-1.96484e-05	8.01185e-06	4.70788e-05	-3.40194e-05	-0.000126862	-0.000132079	-4.3171e-05	-1.00757e-05	-7.2844e-06	-1.14365e-05	1.39571e-05	-2.28554e-05	-4.72153e-05	-2.28346e-05	-6.35247e-05	-3.33925e-05	-1.25669e-05	-5.4539e-05	-7.34461e-05	-2.68045e-05	-3.73181e-05	-2.3348e-05	-2.45891e-05	-8.54365e-05	-0.000206284	-0.000935681	-0.00304
602.91	0	-4.28731e-05	-1.11715e-05	-1.96295e-05	-7.50664e-06	2.83532e-05	-2.23816e-05	-2.44751e-06	-1.79077e-05	4.07996e-05	-9.26267e-05	-9.8509e-05	-8.72786e-05	-5.8519e-05	-4.38186e-05	-1.34764e-05	3.24336e-05	7.12241e-05	9.81784e-05	7.97501e-05	3.23303e-05	1.01988e-05	4.54586e-05	4.69532e-05	-2.15834e-05	1.66813e-05	-7.15682e-06	-4.11759e-05	-3.07087e-07	-5.92635e-05	-1.25361e-05	-2.35964e-05	-3.86173e-05	-4.49203e-05	-4.57196e-05	-7.23937e-07	2.68358e-05	-5.44277e-07	-3.77234e-05	-3.06624e-05	7.93368e-07	-1.02819e-06	1.46437e-05	4.61898e-05	1.5213e-05	-1.60505e-05	-0.000131819	-0.000892004	-0.00309
603.572	0	1.55781e-05	-3.73868e-05	-2.6776e-05	1.76151e-05	6.72222e-05	-1.97723e-05	-2.37492e-05	-2.00405e-06	2.93974e-06	2.49364e-05	2.58659e-05	-6.6552e-07	-3.61425e-05	-1.1129e-05	-5.94011e-06	-4.22882e-05	-5.17264e-05	-2.64814e-05	2.05335e-05	4.83303e-05	1.13845e-05	-1.72526e-05	5.72793e-05	-2.15092e-05	-1.78364e-06	5.17023e-05	6.3341e-05	2.23596e-05	-1.94598e-05	-1.44574e-05	-1.54103e-05	-3.21743e-05	-1.75853e-05	-8.81779e-06	-3.29639e-05	7.88158e-05	4.44093e-05	-6.68293e-05	-1.55316e-05	-2.54589e-05	-4.91416e-06	3.38844e-05	6.85028e-05	2.09866e-05	-5.31277e-05	-0.000238705	-0.000955583	-0.00322
604.235	0	-3.02842e-06	-6.03335e-05	6.34555e-05	6.31533e-05	-1.55902e-06	2.90259e-05	-2.89401e-05	3.40539e-05	7.66327e-06	5.23291e-05	5.43228e-05	6.10881e-05	1.42061e-05	-2.40998e-05	-3.1308e-05	-2.9345e-05	3.89985e-05	2.05895e-05	2.04819e-05	4.13641e-05	1.45794e-05	-1.68874e-05	3.21507e-05	4.45415e-05	4.18894e-05	3.83022e-06	-1.17763e-05	-2.38876e-05	-4.59492e-06	2.37755e-05	-7.44572e-06	1.01094e-05	5.39157e-06	-5.38793e-05	-4.45523e-05	-4.10027e-05	-3.16488e-05	-5.08638e-05	-9.23563e-05	-4.44261e-05	5.02768e-05	5.07188e-05	1.89062e-05	-3.19877e-05	-5.9521e-05	-0.000164958	-0.000951015	-0.00333
604.897	0	-6.10814e-05	7.99786e-05	3.64132e-05	5.05581e-05	5.15521e-05	-2.57566e-06	-8.28038e-05	-4.07261e-05	-1.37284e-05	7.35773e-06	8.18966e-06	7.15837e-06	-1.48512e-05	1.89687e-05	5.94668e-05	2.36059e-05	4.86017e-05	2.00305e-05	1.11889e-05	3.30315e-05	-8.98109e-06	2.61784e-05	3.45624e-05	5.06339e-05	3.71588e-05	-2.95973e-05	-3.54921e-05	-6.27134e-06	4.62503e-06	3.5701e-05	6.53429e-05	2.13638e-05	4.02672e-06	1.23815e-05	-7.65484e-06	3.64871e-05	3.04984e-05	1.80896e-05	1.49262e-05	1.08809e-05	1.49266e-05	-1.90071e-05	-1.24286e-05	1.71273e-05	2.08206e-05	-0.000126727	-0.000996877	-0.00343
605.559	0	-4.04112e-05	7.10516e-06	-1.87081e-05	-7.01087e-05	-4.96603e-05	6.38749e-05	-5.85155e-05	5.28062e-05	-2.04423e-05	-2.58493e-05	-2.58574e-05	-4.31401e-05	-1.95685e-05	6.76914e-05	7.71232e-05	-1.85908e-05	-3.01808e-05	5.37172e-05	0.000134382	0.000142323	6.02425e-05	8.75558e-06	6.30154e-05	0.000106444	4.95733e-05	-5.45468e-07	-2.54729e-05	-2.55806e-05	-4.16585e-06	3.11084e-05	8.56261e-06	-1.07962e-05	2.55281e-05	1.24542e-05	-5.09464e-06	1.408e-05	2.74826e-07	2.49334e-05	3.67132e-05	-2.9849e-05	-7.06169e-05	-5.07212e-05	5.23486e-06	2.00184e-06	-6.46905e-05	-0.000199313	-0.000989562	-0.00349
606.222	0	-5.02313e-05	-5.23124e-05	-7.30923e-05	2.1984e-05	5.77865e-05	1.18716e-05	8.06553e-05	0.000103965	-8.5751e-05	-1.55886e-05	-1.20903e-05	-2.01883e-05	3.21485e-05	0.000103963	5.67965e-05	-3.36294e-05	-7.20057e-05	-1.70438e-05	3.078e-05	4.9541e-06	1.86722e-05	3.07616e-05	-1.50451e-05	-5.45462e-05	-7.23375e-05	-6.16453e-05	2.78335e-05	3.35178e-05	-3.31048e-05	-2.27809e-05	-3.95776e-05	-5.6986e-06	6.27933e-05	4.5095e-05	2.15138e-05	-3.12329e-05	-4.0812e-05	-3.53965e-05	-1.24914e-05	4.68847e-05	-7.74857e-07	-3.00926e-05	8.40856e-06	1.84047e-05	7.69446e-06	-0.000207322	-0.00106	-0.00353
606.884	0	-1.4495e-05	1.38875e-05	-6.59463e-05	-7.41683e-06	7.24702e-05	5.34637e-05	4.16285e-05	7.92848e-05	-0.000124192	1.81384e-05	2.47296e-05	-1.31019e-05	-3.24425e-05	3.22934e-05	7.71342e-06	-5.7236e-05	-5.44986e-05	1.42112e-05	3.65991e-05	-7.96897e-06	7.44331e-05	7.73174e-05	-3.89033e-05	-3.35899e-05	-3.91532e-05	-2.85463e-05	-3.46542e-06	4.62404e-06	6.13246e-05	4.90251e-05	-5.48791e-05	-3.85867e-05	4.29298e-05	0.000103968	8.95558e-05	4.30301e-06	-2.42493e-05	3.02846e-05	4.96248e-05	1.11844e-05	-8.31149e-06	1.91057e-05	8.45118e-05	8.16274e-05	3.42137e-05	-0.000246686	-0.00113	-0.00361
607.547	0	-1.74289e-06	-2.30009e-05	6.59785e-05	3.06678e-05	-3.238e-05	-5.99935e-06	-3.29176e-05	9.10024e-05	-8.35923e-05	-1.87377e-05	-1.55127e-05	-1.22653e-05	4.36488e-05	1.9033e-05	-3.09874e-06	-5.53495e-05	-3.21874e-05	-6.95856e-06	2.92388e-05	4.77917e-05	-3.05591e-06	3.72507e-05	1.99333e-05	-3.13106e-06	-3.41452e-05	-9.31684e-06	6.01633e-06	-3.6291e-05	4.32685e-05	3.51909e-05	-5.1283e-05	1.33508e-05	3.46434e-05	6.87539e-06	-1.99382e-05	-7.3354e-06	-3.7638e-05	-8.37908e-05	-2.47965e-05	2.05636e-06	-5.18809e-05	-3.60387e-05	-8.41145e-06	-2.14138e-05	-1.8668e-05	-0.000203276	-0.00111	-0.00364
608.21	0	1.93849e-05	1.76189e-05	-2.74616e-06	-6.13067e-05	5.64888e-05	8.97078e-05	1.44095e-05	3.38303e-05	-0.000130911	5.27542e-05	6.09638e-05	6.44733e-05	-2.21216e-06	-4.48654e-05	3.86993e-06	-2.33597e-06	-4.69226e-05	-2.63674e-05	1.92823e-05	1.68667e-05	-8.41185e-06	2.05131e-05	2.96929e-05	-7.44627e-06	1.276e-05	5.59177e-05	5.89031e-06	-2.0953e-05	-1.59251e-05	1.14437e-05	1.0215e-05	1.13732e-05	2.34579e-05	2.19673e-05	-6.96913e-06	-1.73217e-05	7.45077e-05	0.000100242	8.23701e-05	3.50604e-05	2.38771e-05	3.68253e-06	-4.4953e-05	-6.10984e-05	-8.29271e-05	-0.000161768	-0.0011	-0.00359
608.872	0	-9.98563e-05	5.49232e-05	2.94045e-05	-1.33278e-07	5.18324e-05	4.6742e-05	-7.75652e-05	5.50397e-05	-7.53802e-05	7.35109e-05	8.01627e-05	-4.92698e-05	-2.96029e-05	-1.22342e-05	-6.01057e-06	-1.67298e-05	-4.80157e-05	9.55189e-06	2.46841e-05	2.83406e-05	3.70055e-05	3.80169e-05	7.88593e-06	2.53723e-05	3.29562e-05	1.35024e-05	3.72867e-05	-1.14328e-05	-2.75664e-05	-9.48599e-06	-3.94901e-05	-6.98848e-05	-2.65908e-05	6.28523e-05	-1.48284e-05	-9.38659e-06	3.11716e-05	2.23292e-05	-3.21247e-05	8.84875e-08	-9.00689e-07	-3.01337e-05	1.84121e-05	-4.22738e-05	-2.55031e-05	-0.00017408	-0.00108	-0.00348
609.535	0	7.48084e-05	-3.88771e-05	-6.85291e-05	8.46809e-05	-3.81363e-05	-3.81494e-05	3.17321e-05	-6.8492e-06	-6.96759e-05	6.60313e-05	7.19207e-05	-0.000102226	1.3875e-05	1.93652e-05	6.00159e-05	6.21466e-05	-3.0245e-06	-2.02346e-05	-1.88405e-05	2.64754e-05	1.20281e-05	-7.21461e-05	-6.50988e-05	2.2833e-05	6.81738e-05	7.10948e-05	1.56292e-05	5.37519e-05	4.35936e-05	-3.58088e-05	-4.17723e-05	-1.76973e-05	1.01473e-05	4.03376e-05	1.33479e-05	4.66593e-05	-6.52324e-05	1.45567e-05	6.77129e-05	3.26847e-05	4.13083e-05	3.93179e-05	6.46564e-05	-3.59064e-05	-2.47212e-05	-0.000172641	-0.00106	-0.00337
610.198	0	9.50339e-06	4.36933e-05	-1.57552e-06	5.04272e-05	-0.000102741	8.05505e-05	2.91677e-05	-6.48677e-05	-9.47627e-05	4.70801e-05	5.31347e-05	-8.80088e-06	-1.67205e-05	-3.95082e-05	-4.48308e-05	3.33246e-06	2.09301e-05	-1.96434e-05	-3.75426e-05	-1.73666e-05	4.11667e-05	-1.52025e-05	-3.05194e-05	-3.66184e-05	-8.18974e-05	-7.23943e-05	-7.45695e-05	-2.95218e-05	-8.47857e-05	-0.000106471	-5.9482e-05	-6.08786e-05	-2.6769e-05	5.45164e-06	-3.24267e-05	-4.28336e-05	-3.2925e-05	-8.34515e-05	-5.45868e-05	-4.70482e-05	-7.93847e-06	2.93887e-05	4.03639e-05	-5.59768e-05	-8.81989e-05	-0.000270594	-0.00113	-0.0033
610.861	0	0.000134048	-1.14795e-05	-3.63045e-05	-9.05969e-06	-6.81981e-05	-6.88851e-06	1.94189e-05	2.06828e-05	-6.70105e-07	-7.3506e-06	-7.58257e-06	-9.57433e-06	1.66629e-05	1.3228e-05	6.38962e-05	5.28727e-05	7.3286e-05	0.000113736	3.88496e-05	4.24992e-05	-7.10793e-06	-1.29214e-05	7.38791e-05	0.000105362	6.07778e-05	4.09825e-05	2.33676e-06	-5.57483e-05	6.24014e-06	2.96975e-05	-1.66005e-05	2.6266e-05	0.000111808	7.88729e-05	-5.48334e-05	2.90202e-05	-1.26137e-05	-2.95297e-05	5.09749e-05	6.25545e-05	4.63557e-06	7.38252e-05	5.8678e-05	4.19434e-05	2.67845e-05	-8.75924e-05	-0.00104	-0.00319
611.524	0	-4.08172e-06	-2.68647e-05	4.90709e-05	9.75629e-06	-9.71352e-06	-7.56046e-05	-1.74904e-05	-2.56407e-05	-9.01881e-06	-5.8269e-05	-6.0386e-05	3.01937e-05	3.71006e-06	-9.54098e-05	-7.44388e-05	2.06091e-05	3.39975e-05	2.28761e-06	4.19958e-06	4.07884e-06	4.82068e-07	-5.7791e-05	-2.62648e-05	8.66156e-06	-6.83481e-05	-2.94956e-05	-1.03348e-05	2.2675e-05	-1.08293e-05	-4.01805e-05	-6.37153e-05	-5.71173e-05	1.09897e-06	-0.000111326	-5.14753e-05	-3.7281e-05	-2.97982e-05	4.15584e-05	-4.65168e-05	-8.24393e-05	4.12397e-05	2.31662e-05	-2.23337e-06	3.36496e-05	-4.53416e-05	-0.000212577	-0.000967668	-0.00294
612.187	0	-7.12894e-05	-4.54629e-05	4.22286e-05	2.5642e-05	5.15917e-05	7.10163e-05	6.13216e-05	2.47381e-06	-1.43831e-05	-7.3102e-05	-7.55453e-05	3.73758e-05	8.34307e-05	-2.27154e-06	3.60378e-05	5.46514e-05	6.6904e-05	3.20837e-05	2.10982e-05	0.000130546	8.49535e-05	-2.24708e-05	-2.69518e-05	4.50923e-07	6.19495e-05	3.15894e-06	-1.68093e-05	7.99925e-05	-2.4938e-05	-6.61057e-06	-8.93252e-06	2.32484e-05	4.4569e-05	3.21335e-05	-1.77312e-05	-3.52181e-05	7.8468e-06	5.71066e-05	9.82757e-08	-2.63813e-05	-7.73587e-06	2.46539e-05	4.05718e-05	3.18047e-05	-3.16174e-05	-0.000151151	-0.000803945	-0.00259
612.85	0	-3.56743e-05	6.41256e-05	5.27447e-05	-2.98914e-05	-1.40706e-05	2.62239e-05	-3.23037e-05	-2.23902e-05	-1.2056e-05	-7.55208e-05	-7.82135e-05	-3.39624e-05	2.42713e-05	-2.26111e-05	-1.5768e-05	-2.95286e-06	8.2035e-05	3.46482e-05	-9.67272e-06	6.25589e-05	7.89189e-05	3.77595e-05	4.73494e-05	4.06782e-05	1.60983e-05	6.00837e-05	0.000102439	2.06915e-05	3.55476e-05	3.21101e-05	5.15878e-05	8.93191e-05	5.92807e-05	3.12292e-05	2.64295e-05	-2.08271e-05	-9.14612e-06	4.03703e-05	2.86408e-05	1.61163e-05	-3.91602e-05	-1.1487e-06	7.83243e-05	-1.48737e-05	-1.89669e-05	-0.000220775	-0.000888678	-0.00246
613.513	0	8.7547e-05	-4.40701e-05	-2.52728e-05	4.97979e-05	-0.000114315	3.96194e-06	-8.06001e-06	-1.58759e-05	1.72867e-05	5.18035e-05	5.31827e-05	-2.45113e-05	4.42666e-05	-4.30112e-05	-0.000119196	9.87963e-06	7.16577e-05	4.93263e-05	4.88607e-05	6.31743e-05	2.77944e-05	2.00353e-05	-5.10915e-05	1.61219e-05	-1.86958e-05	0.000103044	2.77761e-05	-2.95403e-05	4.61665e-05	-3.32883e-05	1.87867e-05	-1.76492e-05	-2.74974e-05	-4.53035e-05	-2.72949e-05	-1.77507e-05	-4.20325e-05	-1.42734e-05	-3.50489e-07	-4.33369e-05	3.2808e-07	5.02116e-05	3.18941e-05	-5.37993e-06	2.40924e-05	-0.000128954	-0.000913521	-0.00225
614.176	0	6.006e-05	-6.8991e-05	-1.00573e-05	4.44639e-05	-5.76506e-05	-1.46338e-05	-6.13428e-05	4.70329e-05	9.77383e-05	-7.02871e-05	-7.7441e-05	4.30296e-05	-8.33828e-06	3.86129e-05	0.000122954	3.72264e-05	1.92312e-05	-1.69971e-05	-8.21434e-07	3.25612e-05	-2.93522e-05	2.584e-05	4.26006e-05	-2.02954e-05	-0.000133159	-5.76704e-05	-3.12019e-05	-1.8887e-05	-5.89367e-05	5.49111e-05	4.69767e-05	3.84501e-05	0.00010489	-5.65574e-05	3.44151e-05	8.08119e-05	0.000108819	2.20554e-05	-7.519e-05	-6.02176e-06	9.03227e-05	-4.49322e-05	9.12749e-06	-4.14648e-06	-1.7693e-05	-0.000153178	-0.000703235	-0.00204
614.84	0	-3.25121e-05	-1.57185e-05	7.33737e-05	-0.000104623	-8.56989e-05	5.49724e-06	-4.64785e-05	7.24807e-05	-6.18204e-06	-5.93399e-05	-6.13961e-05	-5.09233e-06	6.03867e-05	4.08938e-05	1.24659e-05	2.69891e-05	-6.98514e-05	2.40605e-05	4.54792e-05	4.5839e-07	-3.8286e-05	-3.72193e-06	-1.35825e-05	-5.3998e-05	-0.00016021	-3.45172e-05	3.26024e-05	-0.000105291	5.99131e-05	2.57555e-05	-0.00011019	-0.00010121	7.00408e-06	1.26382e-07	-2.5305e-05	-9.57223e-05	-1.75043e-05	-9.26023e-05	-0.000104962	-8.43037e-05	3.0785e-05	-6.3456e-05	-4.53582e-05	2.95424e-05	-1.15791e-05	-0.000137148	-0.000746658	-0.00189
615.503	0	4.67298e-05	-4.56894e-05	-1.27808e-05	-8.1587e-05	1.29272e-05	-2.37037e-05	-3.42801e-05	-1.27647e-05	5.50714e-06	1.67194e-05	1.71547e-05	4.56277e-05	0.000120351	9.72003e-05	-3.71327e-06	7.11099e-05	2.8021e-05	8.09885e-05	6.12948e-05	0.000113155	4.83525e-05	8.10463e-05	1.29715e-05	-3.31896e-05	2.83428e-05	5.10871e-05	-7.18605e-05	-6.90477e-05	1.97481e-05	-2.96376e-05	2.10076e-05	0.000156697	3.11527e-05	0.000112003	2.76094e-05	-1.26604e-05	0.000100125	0.000125585	8.04674e-06	1.91849e-05	7.06916e-05	-1.55189e-05	2.4965e-05	6.79783e-05	4.98441e-05	-8.64093e-05	-0.000644683	-0.00156
616.167	0	-7.23835e-05	-4.00432e-05	-4.78877e-05	-5.60199e-05	3.76441e-05	-1.40536e-05	7.70281e-05	1.01012e-05	2.7788e-05	-2.19098e-05	-2.40328e-05	0.000110088	4.64277e-05	8.35593e-06	-8.48897e-05	1.81552e-05	-1.35888e-05	7.83957e-05	4.62934e-05	3.19291e-05	-1.27119e-06	-4.84734e-05	-4.64082e-05	4.80925e-05	-7.04296e-06	-1.00454e-05	2.09507e-05	8.36545e-06	5.19417e-05	7.49895e-06	5.94239e-05	8.34769e-05	5.88324e-06	-8.04945e-06	5.49097e-06	6.38901e-05	8.0263e-05	1.68e-06	-5.26023e-07	0.000108894	8.19773e-05	3.04666e-05	-7.51453e-05	-3.13473e-05	8.38018e-05	-1.41659e-05	-0.000510684	-0.00137
616.83	0	-6.30151e-05	6.54775e-05	4.10435e-05	-4.73012e-05	0.000104656	-3.75694e-05	-0.000108006	2.43214e-06	-7.47894e-05	-4.77452e-05	-4.64547e-05	1.22819e-08	1.15546e-05	-3.21783e-05	-4.09167e-05	1.99922e-05	5.13423e-05	-1.21564e-05	-7.75217e-05	-4.47792e-06	-2.06066e-05	-2.50351e-06	1.21946e-05	-3.08396e-05	2.06586e-05	3.56849e-05	-0.000105665	9.73293e-05	-3.18494e-05	-4.93658e-05	0.000108181	2.41474e-05	2.73472e-05	4.64112e-05	1.89669e-05	4.38537e-05	3.46526e-05	-4.93412e-05	5.31171e-05	1.42969e-05	-9.78415e-05	-2.52124e-05	1.51005e-05	-4.64393e-05	-3.31818e-06	-9.9458e-05	-0.00051752	-0.00117
617.494	0	-0.000110995	-5.02252e-05	3.2869e-05	5.04939e-05	0.000105166	-6.4458e-05	-3.28125e-05	6.92988e-05	8.00003e-05	6.92718e-05	6.88117e-05	-5.0929e-05	-0.000138559	-4.67667e-05	-3.14843e-05	-4.54114e-05	2.46375e-05	-4.48963e-05	-9.84405e-06	3.6617e-05	4.26979e-05	-1.76164e-05	-8.23557e-06	4.90246e-05	-3.21797e-05	-9.38539e-05	3.25617e-05	-4.64849e-06	-3.79305e-05	-7.64001e-05	8.37298e-06	-0.000111966	-4.81066e-06	6.17378e-05	-4.33279e-05	3.10749e-05	4.38453e-05	2.90466e-05	-5.53687e-05	2.66348e-05	0.0001199	5.50738e-06	-2.74461e-05	1.70066e-06	2.22635e-05	-5.6168e-05	-0.000546778	-0.000997806
618.157	0	3.93299e-05	-6.42005e-05	-6.47639e-05	0.00012097	-7.2003e-05	3.10948e-05	-5.83574e-05	3.98643e-05	-2.78403e-05	0.000152376	0.000160035	5.46458e-05	7.39468e-05	-3.82561e-05	-4.86387e-06	-3.01461e-05	-1.71399e-05	-5.65094e-05	-4.10386e-05	1.84725e-05	6.89157e-06	4.72847e-05	4.89845e-05	9.39426e-06	-1.99691e-05	-4.36788e-05	-6.82056e-06	-6.59181e-05	-1.45087e-05	1.42125e-06	5.74281e-05	8.18423e-05	-3.20672e-05	2.06392e-05	-0.000135585	9.85506e-06	4.77478e-05	3.07629e-05	1.27443e-05	4.1727e-05	2.65614e-05	3.90459e-05	3.68348e-05	1.70919e-05	-7.50624e-06	-6.03463e-05	-0.000388665	-0.000740191
618.821	0	-3.12262e-05	5.43249e-05	-0.000113151	-5.84629e-05	-7.18183e-05	2.21619e-05	-4.29038e-05	0.000131502	-5.50709e-05	-3.80215e-05	-3.69618e-05	-8.56077e-05	-1.43619e-05	-4.98012e-05	3.32e-05	5.05379e-05	6.61882e-05	2.62258e-05	-2.46853e-07	0.000106041	3.47668e-06	-9.38849e-05	6.59562e-05	-4.18247e-05	-0.000103673	-4.86052e-05	-1.02678e-05	1.45183e-07	8.53115e-07	9.66425e-05	8.40308e-05	7.40373e-05	-4.31978e-05	-0.000139185	-1.52556e-05	-7.56483e-05	-6.70869e-05	5.99634e-05	-5.03694e-05	1.63865e-06	-5.25681e-05	2.10876e-05	0.000103041	6.33477e-05	4.04789e-05	3.17586e-05	-0.000301795	-0.000738351
619.485	0	0.000111157	6.60249e-05	-3.72557e-05	-1.65208e-05	-6.21955e-05	-5.41601e-05	-5.01914e-05	0.000119157	3.76053e-06	-6.37167e-05	-6.63147e-05	-0.000131643	1.30979e-05	-6.57421e-05	-7.0984e-05	-6.10689e-05	-0.000134037	0.000123984	-2.28589e-05	4.15849e-06	-1.8392e-05	-9.74999e-05	-7.75001e-05	-1.10842e-05	1.87698e-05	-9.28783e-05	-0.000115489	2.00775e-05	4.33697e-05	-2.28709e-05	5.51843e-05	-0.000111054	2.28309e-07	6.30723e-05	0.000136146	-5.55735e-06	-4.42008e-05	-9.84123e-05	3.12417e-05	1.96497e-05	8.42799e-05	-1.92812e-05	5.31953e-05	3.24092e-06	-3.53484e-05	-0.000114633	-0.000299676	-0.000630608
620.148	0	-6.63549e-06	2.11143e-05	-7.80582e-06	-1.93018e-05	-4.93997e-05	-7.90276e-05	2.35135e-05	0.000139495	-6.67611e-06	3.6846e-05	3.83525e-05	5.16674e-06	1.37381e-05	9.82805e-05	-5.26825e-05	1.04939e-05	0.000142182	0.000193296	-2.02015e-05	9.25185e-05	7.07973e-05	5.39036e-05	0.000127316	2.58685e-05	-5.19752e-05	2.35959e-05	0.000105819	4.76576e-05	8.20076e-05	-5.63648e-05	-1.19713e-05	7.43266e-06	6.80474e-05	0.000110101	3.34259e-05	7.25234e-05	-2.10491e-05	5.03664e-05	-7.02369e-05	3.37277e-05	-6.75629e-06	-1.39641e-05	8.53536e-05	0.000127331	-1.96132e-06	-9.03829e-06	-0.000278745	-0.000578769
620.812	0	-6.44077e-05	6.11141e-05	-2.00549e-05	3.67727e-05	-6.15669e-05	-2.60027e-05	1.62705e-05	8.63061e-05	-3.38126e-05	1.971e-05	1.75441e-05	-8.93353e-05	3.06688e-05	8.76769e-05	-2.84667e-05	-9.5723e-05	2.83855e-05	0.000118625	4.59557e-05	-2.93878e-05	-5.93232e-05	-6.25569e-05	0.000106619	1.72976e-05	-0.000158631	-1.35458e-05	7.19604e-06	4.42313e-05	-3.81362e-05	-2.05403e-05	-8.40475e-05	-0.000166827	7.11136e-05	-0.000130881	6.06811e-05	-0.000105384	6.5301e-05	7.45473e-05	3.92929e-05	-1.50991e-05	-8.22088e-05	-3.73684e-05	1.76519e-05	-7.43379e-06	2.40319e-05	-2.47326e-06	-0.000248818	-0.000444383
621.476	0	-1.33192e-05	1.71107e-05	9.70121e-05	4.04843e-05	-5.72336e-05	-1.03226e-05	-0.000135862	6.39986e-06	4.90055e-07	1.48152e-05	1.65355e-05	3.13761e-05	-2.07686e-06	6.31276e-05	-0.000100158	-0.000179504	-8.20829e-06	-6.8373e-05	4.55638e-05	1.26241e-05	-2.8931e-05	-4.6893e-06	-6.62185e-05	-0.000167274	-5.1854e-05	-8.23706e-05	-8.44823e-05	-9.71822e-05	-6.25818e-05	9.50329e-05	-1.0383e-05	-3.92574e-05	4.01898e-07	-5.03876e-05	-1.81286e-05	-1.09204e-05	4.1865e-05	-2.02647e-05	-7.50636e-05	2.49102e-05	1.39185e-05	5.01698e-06	-9.49756e-05	9.67762e-06	2.67197e-05	-0.000134495	-0.000353614	-0.00052927
622.14	0	5.03366e-05	-1.01989e-05	-5.82958e-05	5.33473e-05	1.36471e-05	-3.73015e-05	3.44697e-05	-6.00448e-05	3.05205e-05	-2.31741e-05	-3.1174e-05	-8.89196e-05	-3.40222e-05	-4.36176e-05	-3.40736e-05	-2.01664e-05	1.0556e-05	0.000106734	0.000150473	-6.54446e-05	9.97679e-05	5.21608e-05	8.65238e-05	2.62227e-05	-7.30086e-06	-7.17942e-05	-5.55614e-05	-1.74092e-05	-4.87826e-05	4.41162e-05	0.000111511	1.0375e-05	1.83248e-05	2.08136e-05	6.01813e-06	3.49891e-05	1.59757e-05	5.17856e-05	-3.64077e-05	4.21895e-05	9.50076e-05	5.61952e-05	3.65377e-05	3.35497e-05	-7.94068e-06	-7.56357e-05	-0.000242375	-0.000453736
622.804	0	-7.57867e-06	8.62722e-05	3.17527e-05	-8.39898e-05	5.89894e-05	3.37913e-05	-3.99981e-05	-4.3321e-05	-7.48059e-05	1.8057e-05	1.27038e-05	-4.88175e-05	4.13911e-05	-2.58787e-05	-6.5304e-05	-2.39329e-05	-1.406e-05	2.3913e-05	-4.04309e-05	7.88296e-05	6.61593e-06	0.000128086	1.55996e-06	-2.64842e-05	-0.000111344	-7.25933e-05	-0.000128115	2.3728e-05	-4.86017e-05	-0.000121059	-0.000114528	3.10134e-05	-1.0952e-05	-4.2029e-05	3.74036e-05	-3.88177e-05	-1.00856e-05	-0.00015618	6.26652e-06	7.92725e-05	-7.34165e-05	-8.63452e-05	2.11229e-05	5.46905e-05	-6.17829e-05	-8.39701e-05	-0.000282648	-0.000507641
623.468	0	3.7931e-05	2.75097e-05	-7.07492e-05	-0.00012995	3.13675e-05	0.000104428	-1.04297e-05	1.63463e-05	8.96843e-06	6.1033e-05	4.4379e-05	-6.13065e-05	6.62163e-05	9.98387e-05	2.05733e-06	8.82894e-06	9.87606e-05	-1.71644e-05	5.34743e-05	0.000104942	6.33985e-05	0.000109117	-1.90837e-05	0.000140028	-5.67937e-05	-5.29409e-05	-9.27254e-05	0.000107784	2.5071e-05	9.20087e-05	0.000124317	3.66363e-05	3.53539e-05	-1.28887e-05	5.20274e-05	3.49344e-05	0.000110571	-3.15527e-05	1.08834e-05	-5.02766e-05	7.45016e-05	5.5789e-05	-9.31992e-05	7.25711e-05	-1.00718e-05	-2.79199e-05	-0.000251903	-0.000442399
624.132	0	2.16464e-05	2.51651e-05	-0.000142304	-1.91343e-05	6.45816e-05	-5.69331e-05	-4.87458e-05	9.83272e-05	-3.6556e-05	1.74753e-05	2.92441e-05	7.47331e-05	2.98659e-05	1.67795e-05	-6.53933e-05	-2.45882e-05	-2.33575e-05	3.13489e-05	5.35801e-05	-3.81507e-06	-8.65634e-05	-1.98838e-05	4.45981e-05	5.27681e-05	-0.000122865	-3.32325e-05	-7.83998e-05	5.03563e-05	1.67621e-05	-4.78666e-05	5.87723e-06	2.12241e-05	-9.45243e-05	-5.24583e-05	-2.16169e-05	-4.90445e-05	-4.23303e-05	-4.72328e-05	2.22449e-05	6.81095e-05	5.90118e-05	-1.43508e-05	-4.25235e-05	1.56665e-05	7.76997e-06	7.36562e-05	-4.94585e-05	-0.000396289
624.797	0	8.48559e-05	-1.16361e-05	-2.35821e-05	-1.53607e-05	-6.62683e-06	1.03722e-05	-6.71852e-05	0.00010905	-2.9049e-05	1.89256e-05	2.17703e-05	1.74106e-05	-3.34366e-05	-6.92867e-05	-6.4445e-05	-2.2977e-05	-2.80042e-05	-4.02806e-05	-5.73969e-05	2.10004e-06	1.23036e-05	6.80785e-05	3.25792e-05	-8.4583e-05	-3.01929e-05	3.79458e-07	-3.06043e-05	1.21734e-05	-4.61342e-05	2.35784e-05	1.36568e-05	-0.000128376	-7.87062e-05	-5.49263e-05	-9.69216e-05	-1.16165e-05	-5.46403e-06	-5.29415e-05	-4.54033e-05	9.9222e-05	-7.76762e-05	-8.70015e-05	-2.93205e-05	2.82599e-05	-2.9655e-05	5.8274e-05	-0.000160774	-0.000421313
625.461	0	-6.93274e-05	-4.20359e-05	4.4635e-05	7.47016e-05	3.2182e-06	-4.60905e-05	1.89912e-05	8.91439e-05	-2.41211e-05	-8.47792e-05	-5.77344e-05	6.7333e-05	8.23487e-05	5.31189e-06	-8.26132e-06	2.79139e-05	-1.55059e-05	4.52356e-05	4.36033e-05	-7.42863e-05	9.18176e-06	4.17804e-05	4.89764e-06	-6.91225e-05	-2.84256e-05	8.66842e-05	7.34279e-05	3.8825e-05	2.16177e-05	2.52203e-05	2.10302e-05	3.59974e-05	5.7853e-05	-3.49471e-05	-8.88433e-05	4.15814e-06	4.61347e-05	-4.33407e-05	-9.28873e-05	-4.59829e-05	7.02125e-05	4.58204e-05	-1.59615e-05	-2.427e-05	-3.44657e-05	-2.26149e-05	-0.000227469	-0.000484978
626.125	0	-5.55475e-05	-6.19223e-05	-0.00012915	-3.99073e-05	0.000123533	-4.29775e-05	-6.99012e-05	3.10961e-05	-2.72405e-05	-7.1493e-05	-5.71753e-05	-1.37122e-05	-3.89234e-05	1.41864e-05	-2.72903e-05	-6.63889e-05	2.12741e-05	-7.22426e-06	-5.91995e-05	-8.34517e-05	-0.000161941	-0.000102123	-6.46831e-05	-1.10541e-06	5.266e-05	8.42847e-05	1.99791e-05	8.91214e-07	-3.66478e-05	-4.28082e-05	-1.81876e-06	-6.88855e-05	-1.79339e-06	2.05823e-05	1.51681e-05	-0.000123401	-7.56058e-06	1.70907e-06	-3.26874e-05	5.57927e-06	-5.44459e-06	-2.42631e-05	-1.65084e-05	-8.46416e-05	-0.000114901	-7.63943e-05	-0.000286653	-0.000510078
626.79	0	2.45296e-06	-0.000109099	0.000115086	1.4128e-05	-4.03243e-05	6.9864e-05	-0.000155241	2.24183e-05	-6.21568e-05	-6.82552e-05	-5.84584e-05	-2.13512e-05	-5.78928e-06	-6.15731e-06	2.04841e-05	-2.9257e-05	-5.99589e-05	-2.48542e-05	-8.58652e-05	-4.68882e-05	-0.000103242	-9.41967e-06	2.49303e-05	-4.82333e-05	-1.84006e-05	-0.000118829	-8.85375e-05	1.80515e-05	-0.000103308	-0.000170226	-0.000140195	-3.25453e-05	1.21448e-05	-0.000125604	-1.77727e-05	-9.95023e-08	-1.50244e-05	-6.84415e-05	7.49507e-05	3.0549e-05	-2.29931e-05	-1.19739e-05	4.01278e-05	6.37893e-05	1.70232e-05	-6.41262e-05	-0.00030845	-0.000405795
627.454	0	-8.27724e-05	8.74626e-05	4.53158e-05	2.13991e-05	-7.58241e-05	-3.76897e-08	6.52109e-05	-7.92502e-05	1.0649e-05	-6.15883e-05	-7.0528e-05	-7.17096e-05	-1.26363e-05	2.18178e-05	8.02108e-06	-6.32918e-05	-4.0715e-05	3.91837e-05	-3.34178e-05	3.79398e-05	-4.57519e-05	-4.7091e-05	-4.75405e-05	-0.000108208	2.57948e-06	-6.39034e-05	1.68832e-05	3.54275e-05	-8.90603e-07	-0.000161495	-6.28928e-05	2.76123e-06	-6.33632e-05	-6.05519e-06	-5.86769e-05	-1.68176e-06	6.04134e-06	-1.20512e-05	-3.41481e-05	-0.000151251	-4.65425e-05	-2.82864e-05	-1.77142e-05	-2.59964e-05	-1.93622e-05	-9.39795e-05	-0.000342811	-0.00040347
628.119	0	4.4071e-05	6.21622e-05	4.72275e-05	-0.000104894	7.21129e-05	1.45354e-05	1.69327e-06	-6.35822e-05	-8.48379e-06	1.7547e-05	-7.60674e-06	-1.77637e-05	9.98959e-05	6.82129e-05	3.31328e-05	-8.81262e-05	-6.67216e-06	5.93794e-05	-2.32009e-05	6.30843e-05	3.2138e-05	3.43113e-06	2.99148e-05	5.34024e-06	4.13099e-06	3.24759e-05	4.50296e-05	5.68207e-05	-3.78095e-05	-5.71703e-05	2.38637e-05	1.62403e-05	-5.22427e-05	3.4471e-05	-3.22929e-05	-4.42914e-05	4.98461e-05	5.49914e-05	-5.54165e-05	-7.11286e-05	4.38666e-05	2.59182e-05	1.91872e-05	2.43104e-05	1.84055e-05	-1.2665e-05	-0.000320511	-0.000418002
628.784	0	-4.95719e-05	-0.000136461	5.16723e-05	-2.97022e-05	7.2699e-05	-8.77356e-05	-2.13002e-05	-1.33342e-05	8.8895e-05	3.54892e-05	1.65711e-05	-2.42225e-05	-3.46019e-05	-3.91199e-05	-6.11885e-05	-0.000128314	-4.91733e-05	1.58153e-06	-6.83953e-06	8.13077e-05	4.18923e-05	-1.47413e-05	-4.97531e-05	-7.35445e-05	-0.00015212	-6.0358e-05	-3.76109e-05	1.13693e-05	-9.30795e-05	-0.000130192	-3.97613e-05	-3.57714e-05	-6.45081e-05	-8.37669e-07	-2.69253e-05	-3.44989e-05	-8.96708e-05	-0.000188441	-7.23361e-05	-3.97183e-05	-2.9201e-05	-4.13897e-05	-1.58258e-05	-7.2969e-05	-8.6641e-05	-0.000164119	-0.00030473	-0.000470014
629.448	0	5.12942e-05	-0.000127594	-2.0925e-05	8.31946e-05	-2.95323e-05	-5.30587e-05	-5.32262e-05	-3.68921e-05	3.4781e-05	-4.13044e-05	-3.80024e-05	-4.14789e-06	4.18437e-05	3.41898e-05	2.44597e-05	-2.2508e-05	-7.57712e-05	3.44221e-05	2.42887e-05	5.32069e-05	-2.11431e-06	-4.63607e-05	-4.17074e-05	-2.25245e-05	5.392e-06	-3.29234e-05	-2.17418e-05	-5.70702e-05	-9.32694e-05	-7.51813e-05	-5.34396e-05	1.42226e-05	-5.08301e-05	-0.000124609	1.07026e-06	-1.19517e-05	-6.82409e-05	-0.000113531	4.35057e-06	-4.64841e-05	-0.000114866	-8.83535e-05	-4.4715e-05	-2.66956e-05	-7.48167e-05	-0.000110902	-0.000244368	-0.000475954
630.113	0	-2.18091e-05	-0.000123542	5.58056e-05	7.61357e-05	-7.61494e-05	-2.09272e-05	1.61306e-05	3.279e-06	8.03792e-05	-5.11826e-05	-8.41378e-05	-0.000119433	-7.55128e-05	-2.93746e-05	-3.18472e-06	-5.58568e-05	-4.10338e-05	-1.24489e-05	-1.84122e-05	3.02338e-05	-3.88711e-05	-5.52237e-05	-3.61839e-05	3.13937e-05	8.71771e-06	1.20816e-05	6.3411e-05	5.61853e-06	-0.000125413	-0.000110199	-6.50984e-05	3.55135e-05	-5.40812e-07	-5.56116e-05	-1.73472e-05	2.02107e-05	4.4701e-05	-4.83724e-05	-2.44532e-05	-3.07426e-06	-3.45394e-05	-7.3634e-05	-6.79851e-06	2.4945e-06	-9.41512e-07	-9.21722e-05	-0.000229548	-0.000513221
630.778	0	1.36318e-05	-8.04479e-05	-5.25487e-05	-5.19086e-06	-6.87448e-05	4.26826e-05	9.03431e-05	-7.04352e-05	3.76928e-06	-0.000145388	-0.000115475	-3.15698e-05	-1.66534e-05	-5.51924e-05	-5.00192e-05	-6.1603e-05	2.98836e-05	5.9698e-05	-7.81834e-05	-9.01352e-05	-5.74845e-05	-1.01459e-05	1.61597e-05	1.38208e-05	-1.42441e-05	-1.58515e-06	2.79651e-05	2.2623e-05	-3.60839e-05	-8.08916e-05	-1.26656e-05	-6.04767e-05	-5.56066e-05	-1.85963e-05	6.85672e-05	1.7227e-05	-5.46755e-05	-3.34227e-05	-1.90831e-05	4.80397e-06	-6.85367e-05	-1.00945e-05	-5.32687e-05	-1.80781e-05	-4.2999e-05	-0.00010394	-0.000332153	-0.000542682
631.443	0	4.11429e-05	-1.1384e-05	-7.18451e-05	5.05634e-06	-3.65184e-06	2.85716e-05	7.86542e-05	-4.48861e-05	-4.2998e-05	8.26311e-05	4.6544e-05	3.75855e-05	9.94948e-05	5.45251e-05	-3.17526e-05	-0.000104564	-1.17541e-05	0.000115267	6.41649e-05	-4.75789e-05	-8.38049e-05	-1.86625e-05	2.51064e-05	3.31798e-05	6.83971e-06	-5.50825e-06	7.69355e-05	6.14244e-05	-1.3551e-05	-0.000108854	-3.83484e-05	4.67415e-05	8.01809e-05	3.98965e-05	7.79067e-06	-6.9683e-05	-2.23723e-05	-1.25122e-05	-7.23383e-05	5.65908e-06	2.39736e-05	6.48009e-05	7.46947e-05	0.00011261	1.40427e-05	-0.000131538	-0.000198872	-0.00036323
632.108	0	8.21124e-05	6.51184e-05	-2.86382e-05	-3.72788e-05	-7.42944e-06	-9.89954e-05	4.1266e-05	-1.7037e-06	-7.83776e-05	5.64889e-05	6.39496e-05	0.000115999	0.000129875	3.38453e-05	-1.72788e-05	-2.35939e-05	-1.67404e-05	1.8593e-05	0.000100551	2.88133e-05	-2.80415e-05	-6.28666e-06	-5.85835e-05	5.45435e-05	0.000102702	2.29107e-05	-2.5765e-05	3.62886e-06	5.59397e-05	-6.09522e-06	1.90742e-05	0.000111524	1.65441e-06	-1.00708e-05	5.21026e-05	-7.00846e-06	-2.53325e-06	6.36301e-05	2.06536e-05	5.01042e-05	5.14113e-05	4.42324e-05	5.52146e-05	5.41528e-05	5.84046e-05	1.70298e-05	-0.000174972	-0.00045562
632.773	0	-3.78878e-05	3.02503e-05	1.49857e-05	0.000117444	-2.09669e-05	-8.75229e-05	0.000122136	-0.000158786	-7.41916e-05	1.37641e-05	3.24275e-06	-5.3781e-05	-5.40968e-05	-2.89468e-05	-6.0426e-05	3.07694e-05	5.34455e-05	1.64701e-05	-3.01565e-05	-0.000119096	-3.59143e-05	-3.95309e-05	3.89992e-06	9.51243e-05	5.11601e-05	4.26116e-05	-8.13101e-06	-2.0129e-05	-6.18934e-06	4.47493e-05	0.000105761	9.60317e-05	4.76731e-05	3.32949e-05	-9.52717e-06	-6.0189e-05	-2.14851e-05	1.08021e-05	-4.99269e-05	-3.94683e-05	-8.93853e-06	-4.71446e-06	-2.55143e-05	-6.86773e-05	-7.19425e-05	-8.04909e-05	-0.000267131	-0.000546384
633.438	0	-4.1989e-05	0.000101236	-4.77802e-05	0.000169254	-1.4929e-05	-7.55135e-05	7.78137e-06	-4.81067e-05	-1.12528e-05	6.03836e-05	4.47218e-05	5.28513e-05	5.29449e-05	1.5001e-05	3.59459e-05	5.3755e-05	2.73469e-05	-2.75645e-05	7.65535e-06	4.01303e-06	-6.15796e-05	-6.44189e-05	-4.2297e-05	1.77378e-05	-3.67522e-05	4.40841e-06	9.63543e-05	4.26185e-05	7.43413e-06	5.63812e-05	3.89794e-05	7.06045e-05	4.18017e-05	-4.97416e-05	-8.37653e-05	-4.61219e-05	-3.86562e-05	-5.35972e-05	-2.07316e-05	-1.4138e-05	2.27538e-05	8.42867e-06	-5.52598e-05	-6.72259e-05	1.04164e-05	-3.97285e-05	-0.000180272	-0.000479416
634.103	0	-2.94008e-05	0.000137303	1.13175e-05	-7.98579e-05	6.37015e-05	-4.0841e-05	2.30954e-05	4.42359e-06	-8.22818e-06	2.9171e-05	5.74106e-05	8.76102e-05	2.0286e-05	-8.62575e-06	5.10764e-05	3.80458e-06	-2.38954e-05	6.03275e-05	9.56992e-05	8.54603e-05	-2.51828e-05	-7.6119e-05	4.5872e-05	6.94885e-05	4.17372e-05	3.84491e-05	6.86701e-05	7.37969e-05	-1.06148e-05	-4.56969e-05	2.36452e-05	8.33153e-05	4.87561e-05	-4.34549e-05	-4.84218e-05	1.60999e-05	-5.86677e-06	-2.28593e-05	2.77853e-05	6.09612e-05	6.62753e-05	-1.42072e-05	-0.000116799	-6.442e-05	-2.26235e-05	-0.000110837	-0.000279499	-0.000492942
634.768	0	-4.55039e-05	-7.61718e-05	5.98271e-05	3.51723e-05	2.49534e-05	-4.45377e-05	4.29795e-05	4.49938e-05	-0.00010738	-7.62092e-05	-2.72254e-05	4.09642e-05	6.14477e-05	4.07178e-05	-1.19907e-05	-3.04049e-05	2.58531e-05	5.39154e-05	-1.71327e-05	6.9853e-06	-1.85694e-05	-8.30739e-05	-7.38098e-05	-6.22755e-06	4.20348e-05	7.74298e-05	2.16243e-05	-1.76253e-05	6.21905e-05	1.21291e-05	-2.38906e-05	-3.67578e-05	2.14575e-06	2.3785e-05	-1.20319e-05	-2.68489e-05	-1.0903e-05	-4.83384e-06	-7.45314e-07	8.06981e-05	0.000114109	5.31845e-05	-5.67987e-06	-4.33692e-05	-4.84551e-05	-9.76163e-05	-0.000222648	-0.000424271
635.433	0	2.75263e-05	4.15973e-05	1.67209e-06	-0.000104838	3.21471e-05	2.10815e-05	-5.29351e-05	-3.27317e-05	-8.28488e-05	-0.00018001	-0.000110707	-2.58403e-05	2.32194e-07	2.86126e-06	-3.16065e-06	-3.39903e-05	2.84013e-05	5.73266e-05	2.63875e-05	-1.60432e-05	-5.26732e-05	2.9994e-06	-0.000108663	-0.000133654	-7.53985e-05	-0.000147344	-7.0443e-05	-3.7652e-05	-3.88253e-05	-4.36463e-05	-5.37539e-05	-4.63561e-05	-8.59164e-06	2.28657e-06	-1.28045e-05	6.85242e-05	8.15524e-05	2.74711e-05	2.32209e-05	-3.00975e-05	-2.68666e-05	1.56754e-05	-6.17836e-05	-9.6127e-05	-9.17189e-05	-0.000155298	-0.000330576	-0.000575098
636.099	0	-3.32224e-05	9.84299e-05	7.21508e-05	-0.000125272	2.05098e-06	-1.13872e-05	-1.06368e-05	-0.000152441	-5.89601e-05	-7.87674e-06	-1.94584e-05	-3.8763e-05	-6.52717e-05	2.76684e-05	9.82e-05	7.22155e-05	1.07948e-05	2.70973e-05	9.76295e-05	5.4652e-05	3.44946e-05	3.05476e-05	-3.18785e-05	-3.89025e-05	1.65037e-05	-2.86898e-05	-5.83675e-05	6.81079e-05	5.462e-05	5.76352e-05	0.000124922	9.93296e-05	6.53334e-05	3.51262e-05	-4.83497e-05	7.92865e-06	2.981e-05	5.63157e-05	7.8468e-05	2.01377e-05	1.32088e-05	1.42804e-05	4.28051e-05	4.91379e-05	-5.83466e-05	-0.000151106	-0.000253022	-0.000563168
636.764	0	-5.5767e-05	-7.66401e-05	3.85905e-05	-0.000147615	0.000105692	-9.09122e-05	6.19838e-05	-7.58401e-05	-3.46814e-05	3.96713e-06	-8.29858e-06	-1.68491e-05	3.15117e-05	1.03379e-05	-2.01575e-05	4.2559e-05	-4.45113e-05	-3.20285e-05	0.000119036	0.000137817	4.067e-05	4.07303e-05	4.19117e-05	2.72027e-05	4.57356e-05	-1.0384e-06	-9.2097e-05	2.31165e-05	0.000100338	0.000113712	7.61453e-05	4.89702e-05	6.70623e-05	-3.72962e-05	-9.4272e-05	-6.86548e-06	3.65029e-05	-3.33037e-06	4.21564e-05	5.34645e-06	1.4612e-06	-5.62259e-05	-8.12616e-05	-5.60555e-05	-6.94723e-05	-0.000151753	-0.000304235	-0.000572624
637.429	0	-8.23535e-05	4.97014e-05	-4.39381e-05	-6.69346e-05	7.02671e-05	5.2943e-05	2.09044e-05	-5.66208e-05	9.09974e-05	-2.52786e-05	-3.00851e-05	-3.71054e-05	-4.85672e-05	-6.38749e-05	3.97682e-06	-4.6654e-05	8.23906e-06	2.37589e-05	1.88761e-05	2.84107e-05	5.18347e-05	3.65086e-05	-6.83978e-05	-7.73893e-05	9.78402e-05	8.6359e-05	1.74504e-05	-2.75198e-05	9.33443e-05	8.20646e-05	1.8844e-05	3.59915e-05	-8.95509e-05	1.65163e-05	9.10738e-05	4.10582e-05	6.73287e-05	7.42102e-06	2.59879e-05	8.71313e-05	-5.20849e-06	-5.09512e-05	-2.47755e-05	1.36553e-05	0.000137378	-1.94191e-05	-0.000273488	-0.000572216
638.095	0	2.94633e-05	-9.10182e-05	2.61214e-05	-2.0616e-05	7.54704e-05	-6.34391e-06	-2.62763e-06	0.000108375	-0.000113851	3.38091e-05	1.76758e-05	4.13234e-05	7.16911e-05	5.72736e-05	4.20832e-05	8.01151e-05	0.000101985	7.97779e-05	4.04425e-05	5.35319e-05	0.000118772	3.9569e-05	4.0684e-05	-6.38354e-05	-1.22896e-05	0.000107689	4.19027e-05	3.99469e-05	2.59528e-05	0.000103917	0.000132965	-5.50736e-05	-2.86262e-05	0.000180374	0.000224852	6.91959e-05	8.36523e-05	8.04141e-05	5.00339e-05	8.44408e-05	3.93749e-05	-5.27901e-05	-3.03959e-05	2.00741e-05	6.82102e-05	4.23102e-05	-0.000201517	-0.000496065
638.76	0	-0.000141046	2.80797e-05	0.000149863	-2.23759e-05	6.40147e-05	-0.000104755	2.51957e-05	2.80662e-05	-0.000138196	-9.49362e-05	-9.46563e-05	-6.53123e-05	7.18346e-05	0.000151342	3.12589e-05	1.79399e-06	9.73883e-05	7.83296e-05	3.79615e-05	6.09166e-05	-4.20472e-05	-2.61329e-05	-2.50026e-05	-0.000125382	-0.000104223	-2.17256e-05	5.68772e-05	-3.60982e-05	2.85197e-06	4.38181e-05	-1.29944e-05	-5.05025e-05	4.36746e-05	4.13524e-05	0.000104159	8.09357e-05	-3.8151e-05	3.75059e-05	7.88214e-05	2.53095e-05	-1.30081e-05	-2.0859e-05	-5.63152e-05	-3.71931e-05	-9.4534e-06	-2.56403e-05	-0.000281092	-0.000542514
639.426	0	-6.17307e-05	-1.41943e-05	1.00445e-05	-3.18283e-06	0.000164946	-0.000124774	-5.87361e-05	9.15729e-05	-1.13839e-06	-2.08591e-05	-4.86257e-05	-3.69499e-05	6.36329e-05	0.000116754	4.52933e-05	-9.23221e-05	-7.20255e-05	8.36837e-05	2.71439e-05	6.66112e-05	-9.84507e-06	-0.000104239	-7.36325e-06	-9.79779e-05	-7.6262e-05	-1.28125e-05	-0.000115924	-0.000146976	1.65931e-06	3.2888e-05	3.05437e-05	-2.3048e-05	-5.35702e-06	2.68785e-05	3.45667e-05	4.56697e-05	-9.54716e-05	-5.4763e-05	-4.47902e-05	-3.36345e-05	-2.84577e-06	-6.61649e-05	-9.47782e-05	-5.7229e-05	-3.06336e-05	-6.09018e-05	-0.000267075	-0.0005868
640.092	0	6.91975e-05	-0.000124321	-6.57535e-05	2.15806e-05	8.11735e-05	6.53015e-05	-3.99021e-05	-3.6264e-06	9.82559e-06	8.72675e-05	4.26019e-05	-2.75785e-05	2.45877e-05	-6.08831e-05	-5.13349e-05	2.94652e-05	-3.89454e-05	-3.07899e-05	7.09746e-05	3.1377e-05	-3.37091e-05	-0.000143901	-8.75465e-05	-8.42457e-05	4.61704e-05	2.56993e-05	-6.61801e-05	-1.26117e-05	6.02694e-05	6.28021e-05	3.55087e-05	-3.42857e-05	-5.33551e-05	-4.96567e-05	0.000126443	0.000130967	-7.97946e-06	-3.23091e-05	1.3609e-05	8.22333e-06	-7.00135e-05	-0.00013236	6.64158e-05	0.000141594	4.65641e-05	-9.14879e-05	-0.000256134	-0.000537253
640.758	0	-5.11956e-05	4.65539e-05	1.14072e-05	-5.19166e-05	3.69234e-05	-7.31428e-05	-2.32904e-05	5.19678e-05	-1.07853e-06	4.12565e-05	-5.46635e-05	-8.40812e-05	5.74636e-05	1.87791e-05	7.34153e-05	5.16514e-05	-7.70706e-05	-8.854e-05	8.722e-06	4.35043e-05	6.82221e-05	-7.75337e-05	-2.25386e-05	-2.85341e-05	0.000122004	0.000157723	3.97501e-05	1.93011e-05	7.02344e-05	7.49566e-05	2.88162e-05	4.0709e-05	-6.07351e-06	4.83372e-05	8.19227e-05	7.5537e-05	-1.3734e-05	-1.71718e-05	8.07938e-05	0.000112482	3.53996e-05	-1.70435e-05	3.70077e-05	4.47458e-05	0.000124097	7.08254e-05	-0.000170669	-0.000487512
641.423	0	-4.59845e-05	0.000128561	-5.35514e-05	8.60597e-05	3.26531e-05	-3.3812e-05	7.12937e-06	-7.98582e-05	-1.64709e-05	-2.22055e-05	6.2085e-05	3.92391e-05	0.0001654	-2.66092e-05	5.21408e-05	2.02e-05	-8.24754e-05	-7.36028e-05	4.34516e-05	-2.18951e-06	-5.36934e-06	-3.56634e-05	3.63111e-05	1.80648e-05	-2.54161e-05	3.67504e-05	0.00011097	0.000141089	0.000101981	3.89031e-05	1.5453e-05	4.51675e-05	7.99869e-05	-5.43425e-06	2.33757e-05	-7.22428e-06	-1.14788e-05	-3.31287e-05	-4.17436e-05	-5.16953e-05	-0.000121701	-9.29004e-05	7.03868e-06	9.02913e-05	0.00014503	0.000129225	-8.17217e-05	-0.000441704
642.089	0	4.3065e-05	0.000101578	4.81298e-05	-2.46179e-05	-4.23564e-05	6.52133e-05	-4.05197e-05	-9.75602e-05	0.000101146	8.42717e-05	4.28239e-05	-3.49383e-05	3.27512e-05	-4.47825e-05	-6.14346e-05	-5.05135e-05	-8.16409e-05	-6.29878e-05	-1.90967e-05	9.4721e-05	3.48642e-05	-3.39722e-05	7.18806e-06	7.04959e-05	-3.90805e-06	5.24658e-05	0.000134596	-5.94185e-05	-0.000101924	-7.39655e-05	-3.46566e-05	-6.52795e-05	4.50979e-05	3.21778e-05	-3.65468e-05	3.1937e-05	2.66719e-05	-0.000147994	-4.58758e-05	8.36562e-05	1.6905e-05	-9.03661e-05	4.77237e-05	-5.50149e-05	-5.26757e-05	-8.63439e-05	-0.0002974	-0.000692854
642.755	0	-0.000224733	1.62821e-05	-7.83908e-05	-2.60924e-05	-0.00017551	-4.34026e-06	7.38667e-05	-4.83493e-05	0.000147297	9.36848e-05	-3.12898e-05	-6.30035e-05	2.39518e-05	-6.56445e-06	-5.04826e-05	-2.85839e-05	-0.000119483	2.29041e-05	-2.70982e-05	-1.74816e-05	5.55528e-06	-3.30415e-05	2.54553e-06	6.83891e-05	-8.23642e-06	2.57546e-05	4.55911e-05	7.18434e-05	-5.99879e-05	-0.000144521	-4.27199e-05	2.4145e-06	-9.44809e-06	-0.00010261	-3.99639e-05	1.26787e-06	4.71873e-05	0.000124822	4.39076e-05	7.039e-05	5.11423e-05	-4.5502e-05	-4.80192e-05	-2.44866e-05	-2.52368e-05	-0.000109098	-0.000258142	-0.000594399
643.421	0	0.00012925	-6.31291e-05	-7.87576e-05	-2.62293e-05	4.05391e-06	-9.49638e-05	0.000126058	5.51073e-06	8.0289e-05	-4.70648e-05	-4.26897e-05	-5.5554e-05	-2.634e-06	-0.000112132	-8.42356e-05	-2.19213e-05	-1.97895e-05	1.18879e-05	-5.17746e-05	-3.2196e-06	4.44384e-05	7.3659e-05	7.86463e-05	-4.1681e-05	5.49188e-05	0.000128214	-8.6913e-05	0.000129275	-1.33352e-05	-0.000161529	5.83923e-05	-2.38628e-06	9.80698e-06	-4.56845e-05	2.87914e-05	7.00583e-05	3.7187e-05	0.000116165	3.58339e-05	5.67916e-05	6.78063e-06	-3.10855e-05	2.32956e-05	0.000102653	0.000154063	4.38346e-05	-0.00011287	-0.000535775
644.087	0	-4.29858e-07	5.82728e-05	5.05584e-05	2.64992e-05	-4.17629e-05	-8.81688e-05	-8.78917e-05	-0.000111996	-7.86518e-06	1.98399e-05	-2.58084e-05	-1.9421e-05	3.32481e-05	4.66005e-05	-8.18043e-06	0.000103235	5.67486e-05	7.28786e-05	-5.10465e-05	2.79006e-05	2.14798e-05	5.22192e-05	-5.34791e-05	-0.00017165	-8.16667e-05	4.92695e-05	3.06515e-05	2.0369e-05	-3.46297e-05	-0.000180853	-5.72318e-05	-6.23251e-05	5.21384e-05	7.36985e-05	7.33451e-05	7.69276e-05	9.79189e-06	-0.000100175	-2.49236e-05	1.35634e-05	5.38594e-05	-6.73152e-05	2.39584e-05	1.80756e-05	0.000121844	1.51395e-06	-0.000146093	-0.000483202
644.753	0	0.000134383	-0.00012402	0.000188413	-9.127e-05	5.09108e-05	-8.02667e-05	4.82439e-05	-1.47031e-06	-0.000114966	8.82173e-05	4.56792e-05	2.57993e-06	-1.02782e-05	6.51607e-06	4.39238e-06	4.31087e-05	2.27448e-05	1.59305e-06	5.45737e-05	-7.75254e-05	7.92377e-06	5.35971e-05	9.44411e-05	3.38311e-05	-1.15774e-05	0.000127687	1.52649e-05	1.13643e-05	-5.81065e-05	-3.25803e-06	9.89771e-05	0.000104161	2.36669e-05	-1.55461e-06	6.38702e-05	8.35371e-05	5.36263e-05	3.62162e-07	0.000121333	2.43432e-05	4.65605e-05	8.34007e-05	-1.5963e-05	-8.33049e-06	2.15915e-05	-0.000117087	-0.000134865	-0.000436681
645.42	0	3.67478e-05	7.34748e-05	-5.41143e-05	-7.58038e-05	-9.85888e-06	-6.77509e-05	-6.7239e-05	1.6733e-05	0.00011634	2.76295e-05	-4.66762e-05	-4.49821e-05	6.63921e-05	-1.44308e-05	8.93237e-05	0.000108409	-2.93945e-05	0.000110752	1.49499e-06	5.75729e-07	2.58811e-05	-1.70133e-05	0.000117738	3.7843e-05	2.21122e-05	0.000115494	-8.63083e-05	-4.9175e-05	8.11886e-05	4.84714e-05	4.60798e-05	0.000202978	9.61117e-05	0.000108457	3.56327e-05	1.14e-05	-5.01356e-05	-5.02357e-05	1.32475e-05	-1.15345e-05	0.000114503	8.58698e-05	-9.99659e-05	-3.13105e-05	8.3168e-05	-8.2929e-05	-0.000237505	-0.000544878
646.086	0	9.49522e-05	2.82214e-06	-0.000163996	5.38838e-05	4.06774e-05	-2.66373e-05	2.73989e-05	2.14005e-05	-2.21627e-05	4.37767e-05	-4.42336e-05	1.92192e-05	0.00015205	9.17767e-05	-5.34618e-06	0.000131644	9.49807e-05	0.000120117	5.67582e-05	7.32284e-05	6.20494e-05	-2.35031e-05	0.000106147	5.80251e-05	1.60552e-05	6.56139e-05	7.20195e-06	4.05529e-05	0.000103387	9.58105e-05	7.88559e-05	7.92727e-05	8.76046e-05	2.78934e-07	5.97794e-05	6.59202e-06	0.000153895	9.65316e-05	0.000111222	0.000119943	7.78731e-05	0.000267719	1.14459e-05	-4.29116e-06	2.29745e-05	-7.14633e-05	-0.000275245	-0.000504974
646.752	0	6.98657e-05	-8.61466e-05	-0.000166187	-5.77548e-05	1.02488e-05	9.056e-05	-8.02664e-05	4.05001e-05	-5.05285e-05	5.22436e-07	-4.96408e-05	-4.84937e-05	-8.63963e-06	-1.44499e-06	-0.000132994	-9.11917e-05	-0.000156438	5.86131e-05	0.000142951	-0.000127914	-1.01164e-05	-4.10053e-05	4.53809e-05	-8.29863e-05	8.91764e-05	-3.95514e-05	-0.000192126	-0.000120249	-8.69408e-06	-0.00017374	0.000127619	0.000117718	1.34307e-05	8.33769e-05	0.000160197	-3.55159e-05	6.66145e-05	-4.50975e-05	1.28372e-05	4.76936e-05	3.69879e-05	0.000188993	0.000118121	0.000159049	-2.49869e-05	-2.59383e-06	-0.000368447	-0.000527895
647.419	0	5.34201e-05	-0.000139587	-0.000168094	-8.75701e-06	2.76375e-06	2.99178e-05	5.94456e-06	-0.000244696	4.90365e-05	2.43747e-05	-8.03154e-05	-8.0465e-05	-5.82744e-05	-8.94002e-05	-9.47192e-05	-2.14978e-05	0.000132281	0.000184535	6.12312e-05	-0.000107324	-1.08491e-05	4.2515e-05	5.15295e-05	0.000149003	1.19598e-05	6.76573e-05	0.000151378	7.49783e-05	3.03478e-05	0.000106467	6.6122e-05	1.27275e-05	5.75796e-06	-1.77134e-05	0.000109906	-4.87142e-05	-5.98822e-05	3.31424e-05	3.98568e-05	2.2098e-05	0.000141544	3.81332e-05	-5.22635e-05	6.28306e-05	2.51101e-05	-9.42237e-05	-0.000224827	-0.000679087
648.085	0	0.000142889	-0.000192749	-0.000117114	0.000193967	-2.85202e-05	4.62894e-05	2.07722e-05	-0.000106289	0.000109549	7.00148e-05	-1.7627e-05	-1.47214e-05	-0.000101006	-9.45669e-05	-4.3189e-05	9.46842e-05	4.33401e-05	8.90914e-05	7.53241e-05	-7.05728e-05	-1.36307e-05	8.50882e-08	8.73672e-06	0.000166525	2.74773e-05	2.9227e-05	5.04739e-05	-2.7979e-05	-0.00011413	1.73435e-06	-0.000191242	4.95003e-05	1.57719e-05	4.12974e-05	-1.5878e-05	3.07919e-05	5.97499e-05	9.76918e-05	-8.72259e-05	-5.0216e-05	-6.87054e-06	8.32254e-05	-2.86366e-05	5.01612e-06	-1.51445e-06	1.69612e-05	-0.000308112	-0.000636428
648.752	0	-5.09617e-05	-6.74334e-05	-9.69649e-05	0.000186496	-0.000110446	-1.04754e-05	4.99841e-05	5.70529e-06	-7.33912e-05	0.000123108	0.000227786	-1.82879e-05	-4.00979e-06	-9.47693e-05	2.25533e-05	9.12077e-05	-4.73454e-05	5.16147e-05	1.30283e-05	2.47064e-05	7.67452e-05	8.54224e-05	0.000107582	0.000197957	-2.07575e-05	6.29236e-05	7.00398e-05	-2.05911e-05	-9.62773e-05	3.91697e-05	5.72848e-05	8.15643e-05	9.28446e-05	0.000128763	3.25145e-05	0.000159038	0.000107239	0.000141449	5.8628e-05	0.000147847	0.000156556	0.000180149	6.85729e-05	0.000243728	-1.90711e-06	0.000100511	-0.000217684	-0.000428646
649.418	0	0.000141124	-0.000272185	-7.75123e-05	-2.07687e-05	9.5284e-05	7.69219e-05	5.66494e-05	-2.15058e-06	-4.93867e-05	0.00016381	0.000146706	-2.17799e-05	1.82153e-05	-0.000106646	1.88295e-05	-0.000103375	0.000216273	3.15964e-05	6.82016e-05	6.37875e-05	0.000114291	5.44108e-05	4.79409e-05	6.92373e-05	0.00011234	3.27683e-05	0.000161315	1.23218e-05	9.96839e-05	6.30468e-05	0.000144097	-2.11761e-05	-0.000181202	-6.12524e-06	0.000119361	0.000206501	9.95527e-05	-4.30288e-05	0.000148569	0.000140575	7.98322e-05	-0.000113357	5.58316e-05	0.000127512	-5.74865e-05	-7.23291e-05	-0.000149429	-0.000557254
650.085	0	7.51176e-05	-0.000130956	-8.92317e-05	8.11698e-05	7.99348e-05	-8.74136e-05	-4.53379e-05	8.42584e-06	6.59939e-05	-1.31188e-05	0.000114896	0.000101054	-0.000111199	-8.6589e-06	-9.98916e-05	-9.02702e-05	0.000104296	-7.40086e-05	8.65539e-05	0.000165429	0.000223428	0.000109463	0.00013715	-0.000140616	3.79243e-05	-0.000140877	0.000170215	4.09591e-05	1.42832e-05	-5.74087e-05	-4.65865e-05	0.000214694	4.03788e-05	7.38254e-05	-3.71677e-05	0.000144338	0.000197701	9.89448e-06	-4.32778e-05	7.75109e-05	0.000109489	-6.33696e-05	-4.18743e-05	0.000108582	-9.76999e-05	3.19821e-05	-0.000262733	-0.000514915
650.752	4.24687e-05	-4.50858e-05	8.34214e-07	-0.000109417	0.000200929	-9.12056e-05	8.49306e-05	-6.15879e-05	-4.86005e-05	2.67348e-05	1.65555e-05	4.30393e-05	-5.34803e-05	3.23335e-05	2.09497e-05	-3.42055e-05	-6.28481e-05	-7.81498e-05	-1.27929e-05	9.50713e-05	-5.10464e-05	0.00020854	-0.000150542	9.3909e-06	6.08454e-05	-0.000152911	-4.99454e-05	5.84621e-05	4.59194e-05	6.24216e-05	-2.94241e-05	-6.72735e-05	8.20146e-05	-7.60965e-06	8.70937e-06	-5.48014e-05	0.000173938	0.000113061	1.99227e-05	0.000101133	5.47225e-05	1.16167e-05	-1.25114e-05	-2.06844e-05	0.000249648	-0.000104839	5.14029e-05	-0.000233577	-0.000496461
[truncated: 173 more columns]

[truncated: 60 more sheets: Figure 3e, Figure 3f, Figure 3g, Figure 4b, Figure 4c, Figure 4d, Figure 4f, Figure 4g, Figure 4h, Figure 4j, Figure 4k, Figure 4l, Supplementary Figure S14a, Supplementary Figure S14b, Supplementary Figure S16, Supplementary Figure S17, Supplementary Figure S18, Supplementary Figure S19, Supplementary Figure S20a, Supplementary Figure S20b …]
